# Supplementary material for: Risk for animal and human health related to the presence of dioxins and dioxin‐like PCBs in feed and food
Source: PubMed Central journal article supplement (PMC7009407; doi:10.2903/j.efsa.2018.5333), 2018-11-20
Supplement: EFS2-16-e05333-s001.pdf [file EFS2-16-e05333-s001.pdf]

Annex to:

EFSA CONTAM Panel (EFSA Panel on Contaminants in the Food Chain), Knutsen HK, Alexander J, Barregård L, Bignami M, Brüschweiler B, Ceccatelli S, Cottrill B, Dinovi M, Edler L, Grasl-Kraupp B, Hogstrand C, Nebbia CS, Oswald IP, Petersen A, Rose M, Roudot AC, Schwerdtle T, Vleminckx C, Vollmer G, Wallace H, Fürst P, Håkansson H, Halldorsson T, Lundebye AK, Pohjanvirta R, Rylander L, Smith A, van Loveren H, Waalkens-Berendsen I, Zeilmaker M, Binaglia M, Gómez Ruiz JA, Horváth Z, Christoph E, Ciccolallo L, Ramos Bordajandi L, Steinkellner H and Hoogenboom LR, 2018. Scientific opinion on the risk for animal and human health related to the presence of dioxins and dioxin-like PCBs in feed and food. *EFSA Journal* 2018;16(11):5333, <https://doi.org/10.2903/j.efsa.2018.5333>

© 2018 European Food Safety Authority. *EFSA Journal* published by John Wiley and Sons Ltd on behalf of European Food Safety Authority.

## Annex A – Additional information for the risk assessment for human and animal health related to the presence of dioxins and DL-PCBs in food and feed

### Table of Contents

|                                                                                                                                                                |            |
|----------------------------------------------------------------------------------------------------------------------------------------------------------------|------------|
| <b>ANNEX A.1. STRATEGY FOR THE RISK ASSESSMENT FOR HUMAN AND ANIMAL HEALTH RELATED TO THE PRESENCE OF PCDD/Fs AND DL-PCBs IN FOOD AND FEED .....</b>           | <b>4</b>   |
| A.1.1. Problem formulation .....                                                                                                                               | 4          |
| A.1.2. Method to address the hazard identification and characterisation sub-questions .....                                                                    | 8          |
| A.1.3. Method to address the exposure assessment sub-questions .....                                                                                           | 43         |
| A.1.4. Method to address the uncertainties in the risk assessment.....                                                                                         | 45         |
| A.1.5. Approach for reaching risks characterisation conclusions.....                                                                                           | 45         |
| A.1.6. Plans for updating the literature searches and dealing with newly available evidence.....                                                               | 45         |
| A.1.7. Human resource, software and timeline for performing the risk assessment.....                                                                           | 46         |
| A.1.8. History of the amendments .....                                                                                                                         | 47         |
| <b>ANNEX A.2. DATA AND METHODOLOGIES – SEARCH STRINGS .....</b>                                                                                                | <b>49</b>  |
| A.2.1. Supporting information for the risk assessment .....                                                                                                    | 49         |
| A.2.2. Adverse effects in farm and companion animals .....                                                                                                     | 50         |
| A.2.3. Toxicokinetics and transfer.....                                                                                                                        | 53         |
| <b>ANNEX A.3. FEED INTAKES AND DIET COMPOSITION FOR LIVESTOCK AND COMPANION ANIMALS.....</b>                                                                   | <b>55</b>  |
| A.3.1. Feed intakes.....                                                                                                                                       | 55         |
| A.3.2. Diet composition.....                                                                                                                                   | 57         |
| <b>ANNEX A.4. STUDIES ON THE TRANSFER OF PCDD/Fs AND DL-PCBs IN FOOD PRODUCING ANIMALS.....</b>                                                                | <b>61</b>  |
| A.4.1. Studies in ruminants .....                                                                                                                              | 61         |
| A.4.2. Studies in poultry.....                                                                                                                                 | 63         |
| A.4.3. Studies in pigs.....                                                                                                                                    | 65         |
| A.4.4. Studies in several species (ruminants, pigs, poultry) .....                                                                                             | 66         |
| A.4.5. Studies in fish.....                                                                                                                                    | 67         |
| <b>ANNEX A.5. STUDIES IN RODENTS WITH EXPOSURE VALIDATED AND AT OR BELOW THE BENCHMARK CUT-OFF, PERFORMED WITH CONGENERS OR MIXTURES OTHER THAN TCDD .....</b> | <b>79</b>  |
| <b>ANNEX A.6. STUDIES IN EXPERIMENTAL ANIMALS (RODENTS AND PRIMATES) .....</b>                                                                                 | <b>82</b>  |
| A.6.1. Studies in rodents.....                                                                                                                                 | 82         |
| A.6.2. Studies in primates .....                                                                                                                               | 93         |
| <b>ANNEX A.7. RISK OF BIAS APPRAISAL OF STUDIES IN EXPERIMENTAL ANIMALS (RODENTS AND PRIMATES) .....</b>                                                       | <b>100</b> |
| A.7.1. Studies in rodents.....                                                                                                                                 | 100        |
| A.7.2. Studies in primates .....                                                                                                                               | 106        |
| <b>ANNEX A.8. EPIDEMIOLOGICAL STUDIES.....</b>                                                                                                                 | <b>110</b> |
| A.8.1. Studies on male reproductive effects .....                                                                                                              | 110        |
| A.8.2. Studies on female reproductive effects.....                                                                                                             | 121        |
| A.8.3. Studies on birth outcomes.....                                                                                                                          | 133        |
| A.8.4. Studies on thyroid disease and thyroid hormones .....                                                                                                   | 146        |
| A.8.5. Studies on type 2 diabetes and obesity .....                                                                                                            | 156        |
| A.8.6. Studies on cardiovascular effects .....                                                                                                                 | 170        |

|                                                                                                                  |            |
|------------------------------------------------------------------------------------------------------------------|------------|
| A.8.7. Studies on hepatic disorders and digestive effects .....                                                  | 176        |
| A.8.8. Studies on effects in the immune system .....                                                             | 180        |
| A.8.9. Studies on effects on the nervous system .....                                                            | 193        |
| A.8.10. Studies on effects on teeth and bone .....                                                               | 208        |
| A.8.11 Studies on cancer .....                                                                                   | 212        |
| <b>ANNEX A.9. RISK OF BIAS APPRAISAL OF EPIDEMIOLOGICAL STUDIES .....</b>                                        | <b>233</b> |
| A.9.1. Studies on male reproductive effects .....                                                                | 233        |
| A.9.2. Studies on female reproductive effects.....                                                               | 239        |
| A.9.3. Studies on birth outcomes.....                                                                            | 248        |
| A.9.4. Studies on thyroid disease and thyroid hormones .....                                                     | 255        |
| A.9.5. Studies on diabetes and obesity .....                                                                     | 262        |
| A.9.6. Studies on cardiovascular effects .....                                                                   | 268        |
| A.9.7. Studies on hepatic disorders and digestive effects .....                                                  | 272        |
| A.9.8. Studies on effects in the immune system .....                                                             | 274        |
| A.9.9. Studies on effects on the nervous system .....                                                            | 282        |
| A.9.10. Studies on effects on teeth and bone .....                                                               | 289        |
| A.8.11 Studies on cancer .....                                                                                   | 291        |
| <b>ANNEX A.10. EFFECTS OF PCDD/Fs AND DL-PCBs ON SERUM LEVELS OF SEX HORMONES<br/>AND RELATED PROTEINS .....</b> | <b>301</b> |
| <b>ANNEX A.11. STUDIES ON THE ADVERSE EFFECTS OF PCDD/Fs and DL-PCBs IN FARM AND<br/>COMPANION ANIMALS .....</b> | <b>303</b> |
| A.11.1. Studies in ruminants .....                                                                               | 303        |
| A.11.2. Studies in pigs .....                                                                                    | 308        |
| A.11.3. Studies in rabbits .....                                                                                 | 309        |
| A.11.4. Studies in horses .....                                                                                  | 310        |
| A.11.5. Studies in poultry.....                                                                                  | 311        |
| A.11.6. Studies in fish.....                                                                                     | 334        |
| A.11.7. Studies in cats and dogs.....                                                                            | 360        |
| A.11.8. Studies in fur animals.....                                                                              | 361        |
| References.....                                                                                                  | 368        |
| Abbreviations .....                                                                                              | 420        |

## **ANNEX A.1. STRATEGY FOR THE RISK ASSESSMENT FOR HUMAN AND ANIMAL HEALTH RELATED TO THE PRESENCE OF PCDD/Fs AND DL-PCBs IN FOOD AND FEED**

In the context of the on-going EFSA Prometheus project (PROMoting METHods for Evidence Use in Science) aimed at further enhancing the methodological rigour, transparency and openness of EFSA scientific assessments, this risk assessment was chosen as a case-study to test the importance of performing the assessment in two steps, i.e. planning phase and implementing phase. For the planning phase of the risk assessment, the current strategy is being developed with the aim of performing a priori the whole process of problem formulation and defining as much as possible beforehand the strategy for gathering the data, the criteria for selecting and appraising the evidence, and for the synthesis of the results.

The experience gained with this specific risk assessment will provide guidance for further refinement of the Methodological Framework developed in the Prometheus project.

### **A.1.1. Problem formulation**

#### **A.1.1.1. Objectives of the risk assessment**

This present risk assessment aims at assessing (i) the risk for adverse effects in humans associated with the dietary exposure to polychlorinated dibenzo-*p*-dioxins (PCDDs), polychlorinated dibenzofurans (PCDFs) and dioxin-like polychlorinated biphenyls (DL-PCBs) in food, and (ii) the risk for adverse effects in farm and companion animals associated to the dietary exposure to PCDD/Fs and DL-PCBs in feed.

The scientific evidence needed to directly address these two main objectives will be dealt with by applying a narrative or a structured approach according to the specific sub-questions identified for each risk assessment pillar and by target population (humans/farm and companion animals).

In order not to exclude any related papers the bibliography of the key full text papers will be checked for further potential relevant studies. This technique is known as snowballing. The expertise of the working group will be used in deciding whether to pursue these further to complement the evidence collection.

Relevant information about previous risk assessments by international bodies, chemistry, analytical methods, current EU legislation, previously reported occurrence data in food and feed and exposure assessments (including time trends), as reported in the literature, will be gathered and summarised in a narrative way based on expert knowledge/judgement.

#### **A.1.1.2. Target populations**

The target population of the human risk assessment is the EU population, including specific vulnerable groups (foetus and breast-fed infants) and groups with high exposure due to dietary preferences, e.g. people eating fish from contaminated areas.

The target populations of the animals risk assessment are farm and companion animals including cattle, sheep, goats, pigs, poultry, rabbits, farmed fish, fur producing animals, horses, dogs and cats.

#### **A.1.1.3. PCDD/Fs and DL-PCBs of concern and route of exposure**

The risk assessment is limited to the dietary exposure to the 17 PCDD/Fs substituted in the 2,3,7,8-positions, and the 12 DL-PCBs (Table 1). Other persistent dioxin-like compounds (e.g. brominated dioxins) are not part of the Terms of Reference for the scientific opinion, their potential influence on the outcome of epidemiological studies will be addressed in the uncertainty analysis.

In order to assess and compare the toxicity of a mixture of congeners analysed in complex samples, the CONTAM Panel applied the concept of toxic equivalents (TEQs) based on different toxicity equivalency factors (TEFs) for the toxic congeners. It should be noted that the TEFs are an order of magnitude estimates of the toxicity of TCDD, which adds uncertainty to the risk assessment and will be addressed in the uncertainty analysis.

In the European legislation, all regulatory levels for PCDD/Fs and DL-PCBs in food and feed are presently expressed as TEQs using the WHO<sub>2005</sub>-TEFs proposed by the World Health Organization (WHO) in 2005 (van den Berg et al., 2006). Therefore, current occurrence data are generally expressed as WHO<sub>2005</sub>-TEQs. If relevant for this opinion, older data which are expressed as WHO<sub>1998</sub>-TEQs are recalculated with the WHO<sub>2005</sub>-TEFs.

The effect of potential deviations of the WHO<sub>2005</sub>-TEF values, based on the outcome of studies published since its last revision, will be addressed in the uncertainty analysis.

In addition, consideration will be given to potential non-dietary sources of exposure (such as soil and air) to indicate the relative importance of the diet to the overall PCDD/Fs and DL-PCBs exposure.

**Table 1.** Compounds of concern for the risk assessment

| Congener                         | Structure                                              | WHO-TEF <sub>2005</sub> value <sup>(a)</sup> |
|----------------------------------|--------------------------------------------------------|----------------------------------------------|
| <b>PCDDs</b>                     |                                                        |                                              |
| 2,3,7,8-TCDD                     | 2,3,7,8-Tetrachlorodibenzo- <i>p</i> -dioxin           | 1                                            |
| 1,2,3,7,8-PeCDD                  | 1,2,3,7,8-Pentachlorodibenzo- <i>p</i> -dioxin         | 1                                            |
| 1,2,3,4,7,8-HxCDD                | 1,2,3,4,7,8-Hexachlorodibenzo- <i>p</i> -dioxin        | 0.1                                          |
| 1,2,3,6,7,8-HxCDD                | 1,2,3,6,7,8-Hexachlorodibenzo- <i>p</i> -dioxin        | 0.1                                          |
| 1,2,3,7,8,9-HxCDD                | 1,2,3,7,8,9-Hexachlorodibenzo- <i>p</i> -dioxin        | 0.1                                          |
| 1,2,3,4,6,7,8-HpCDD              | 1,2,3,4,6,7,8-Heptachlorodibenzo- <i>p</i> -dioxin     | 0.01                                         |
| 1,2,3,4,6,7,8,9-OCDD             | 1,2,3,4,6,7,8,9-Octachlorodibenzo- <i>p</i> -dioxin    | 0.0003                                       |
| <b>PCDFs</b>                     |                                                        |                                              |
| 2,3,7,8-TCDF                     | 2,3,7,8-Tetrachlorodibenzofuran                        | 0.1                                          |
| 1,2,3,7,8-PeCDF                  | 1,2,3,7,8-Pentachlorodibenzofuran                      | 0.03                                         |
| 2,3,4,7,8-PeCDF                  | 2,3,4,7,8-Pentachlorodibenzofuran                      | 0.3                                          |
| 1,2,3,4,7,8-HxCDF                | 1,2,3,4,7,8-Hexachlorodibenzofuran                     | 0.1                                          |
| 1,2,3,6,7,8-HxCDF                | 1,2,3,6,7,8-Hexachlorodibenzofuran                     | 0.1                                          |
| 2,3,4,6,7,8-HxCDF                | 2,3,4,6,7,8-Hexachlorodibenzofuran                     | 0.1                                          |
| 1,2,3,7,8,9-HxCDF                | 1,2,3,7,8,9-Hexachlorodibenzofuran                     | 0.1                                          |
| 1,2,3,4,6,7,8-HpCDF              | 1,2,3,4,6,7,8-Heptachlorodibenzofuran                  | 0.01                                         |
| 1,2,3,4,7,8,9-HpCDF              | 1,2,3,4,7,8,9-Heptachlorodibenzofuran                  | 0.01                                         |
| 1,2,3,4,6,7,8,9-OCDF             | 1,2,3,4,6,7,8,9-Octachlorodibenzofuran                 | 0.0003                                       |
| <b>DL-PCBs (non-ortho PCBs)</b>  |                                                        |                                              |
| PCB-77                           | 3,3',4,4'-Tetrachlorobiphenyl                          | 0.0001                                       |
| PCB-81                           | 3,4,4',5-Tetrachlorobiphenyl                           | 0.0003                                       |
| PCB-126                          | 3,3',4,4',5-Pentachlorobiphenyl                        | 0.1                                          |
| PCB-169                          | 3,3',4,4',5,5'-Hexachlorobiphenyl                      | 0.03                                         |
| <b>DL-PCBs (mono-ortho PCBs)</b> |                                                        |                                              |
| PCB-105                          | 2,3,3',4,4'-Pentachlorobiphenyl                        | 0.00003                                      |
| PCB-114                          | 2,3,4,4',5-Pentachlorobiphenyl                         | 0.00003                                      |
| PCB-118                          | 2,3',4,4',5-Pentachlorobiphenyl                        | 0.00003                                      |
| PCB-123                          | 2,3',4,4',5'-Pentachlorobiphenyl                       | 0.00003                                      |
| PCB-156                          | 2,3,3',4,4',5-Hexachlorobiphenyl                       | 0.00003                                      |
| PCB-157                          | 2,3,3',4,4',5'-Hexachlorobiphenyl                      | 0.00003                                      |
| PCB-167                          | 2,3',4,4',5,5'-Hexachlorobiphenyl                      | 0.00003                                      |
| PCB-189                          | 2,3,3',4,4',5,5'-Heptachlorobiphenyl                   | 0.00003                                      |
| <b>Toxic equivalents</b>         |                                                        |                                              |
| WHO <sub>2005</sub> -TEQs        | Toxic equivalents (based on WHO <sub>2005</sub> -TEFs) |                                              |

DL-PCBs: dioxin-like polychlorinated biphenyls; PCDDs: polychlorinated dibenzo-*p*-dioxins; PCDFs: polychlorinated dibenzofurans; TEQ: toxic equivalent; WHO: World Health Organization.

(a): According to Van den Berg et al. (2006).

#### A.1.1.4. Adverse effects and endpoints

The human and animal risk assessments will address the adverse effects associated with the exposure to PCDD/Fs and DL-PCBs as identified in the hazard identification step.

Adverse effects of PCDD/Fs and DL-PCBs are well known based on animal and human data, and are addressed in previous risk assessments. These have identified skin lesions, i.e. chloracne, hepatic

alterations and cancer after exposure to high levels of PCDD/Fs and other dioxin-like compounds (WHO/FAO, 2002). Exposure to lower levels has been documented to cause developmental and reproductive toxicity, immunotoxicity and neurodevelopmental effects, among others. However, they are not considered to be genotoxic.

#### A.1.1.5. Identification of the risk assessment sub-questions

The general principles of the risk assessment process for chemicals in food as described by WHO/IPCS (2009) will be applied, which include hazard identification and characterisation, exposure assessment and risk characterisation. In addition, the following EFSA guidances pertaining to risk assessment will be followed for the development of the risk assessment:

- Guidance of the Scientific Committee on a request from EFSA related to uncertainties in Dietary Exposure Assessment (EFSA Scientific Committee, 2006);
- Guidance of the Scientific Committee on use of the benchmark dose approach in risk assessment (EFSA Scientific Committee, 2009a);
- Guidance of the Scientific Committee on transparency in the scientific aspects of risk assessments carried out by EFSA. Part 2: General principles (EFSA Scientific Committee, 2009b);
- Management of left-censored data in dietary exposure assessment of chemical substances (EFSA, 2010a);
- Use of BMDS and PROAST software packages by EFSA Scientific Panels and Units for applying the Benchmark Dose (BMD) approach risk assessment (EFSA, 2011a);
- Guidance of EFSA on the use of the EFSA Comprehensive European Food Consumption Database in exposure assessment (EFSA, 2011b);
- Overview of the procedures currently used at EFSA for the assessment of dietary exposure to different chemical substances (EFSA, 2011c);
- Guidance on selected default values to be used by the EFSA Scientific Committee, Scientific Panels and Units in the absence of actual measured data (EFSA Scientific Committee, 2012a);
- Scientific Opinion on Risk Assessment terminology (EFSA Scientific Committee, 2012b).

This section illustrates the objectives of each risk assessment pillar (i.e. hazard identification, hazard characterisation and exposure assessment) and identifies the risk assessment sub-questions that will be answered and combined for performing the assessment for humans (Table 2), and for farm and companion animals (Table 3).

As indicated in the EFSA Prometheus deliverable, 'EFSA assessments are rarely represented by narrow, focussed questions; in most cases they are broad and require more than one sub-question to be answered. A sub-question is a scientific question that does not need to be further broken down to be answered and is formulated in a way that is directly answerable in an experimental or observational study (or as a single question in an expert elicitation study) (EFSA, 2015). Most common sub-questions fall into three main types (EFSA, 2010b): (1) sub-questions on the association between an exposure or intervention and outcome(s); (2) sub-questions on occurrence (or prevalence or incidence) of a given condition (i.e. descriptive statistics); and (3) sub-questions on test accuracy. The degree to which the question is broken down into sub-questions depends in part on several factors including: i) the complexity of the problem, ii) the different expertise needed for each part, iii) the time available. This must be discussed explicitly by the assessors'.

For the human risk assessment, studies on both humans and experimental animals will be used for the hazard identification and characterisation. In experimental animals, PCDD/Fs and DL-PCBs cause adverse effects, and these have been extensively described in previous risk assessment by international bodies such as SCF (2000, 2001), WHO/FAO (2002) and US-EPA (2012). The dose levels used in these studies vary considerably. The Working Group concluded that studies in which the

target compounds have been administered at doses that result in higher body burdens<sup>1</sup> in the animal than those that formed the basis of the point of departure in these previous assessments are not informative for the hazard characterisation. SCF (2000, 2001) evaluated studies with lowest-observed-adverse-effects levels (LOAELs) corresponding to estimated maternal body burdens of 40–100 ng/kg bw or a no-observed-adverse-effect level (NOAEL) corresponding to 20 ng/kg bw for deriving the estimated human daily intake leading to these body burdens and subsequently the tolerable weekly intake (TWI) of 14 pg TEQ/kg bw. Therefore, only experimental animal studies in which the administration of the target compounds included measured/estimated body burdens lower than 100 ng WHO-TEQ<sub>2005</sub>/kg bw will be considered to answer the sub-question. The present assessment will therefore include all studies after the WHO (1998) and the SCF assessments (2000, 2001), with focus in the adverse effects observed at low levels of exposure as indicated above.

For the farm and companion animal risk assessment, studies in the target species will be used for the hazard identification and characterisation. No previous risk assessments have addressed the adverse effects of the target compounds in the target species. The European Commission's former Scientific Committee on Animal Nutrition (SCAN, 2000) evaluated the contribution of PCDD/Fs and PCBs (including DL-PCBs) in feedingstuffs to the contamination of food of animal origin, but did not include a risk assessment of PCDD/Fs and/or DL-PCBs in feed for the farm/companion target species. Therefore, the farm and companion animal risk assessment will include studies published in the open literature since 1950.

The potential association between the target compound(s) and the endpoints of interest for the human and farm/companion animal risk assessment will be evaluated. It will include an assessment of the dose-response relationship and an evaluation of possible uncertainties, for example those derived from consideration of the toxicokinetic and toxicodynamic properties of the target compounds and from considerations of inter-species variability in case animal data are being used for deriving a health based guidance value (HBGV).

As a next step, the human and the farm and companion animal dietary exposure to the target compounds will be estimated.

The final step will be the comparison of the exposure estimates to the HBGVs established (e.g. tolerable intake), or estimation of the margin of exposure.

**Table 2.** Human risk assessment sub-questions to be answered

| Risk assessment step    | N. | Risk assessment sub-questions                                                                                                                                                             | Approach                          |
|-------------------------|----|-------------------------------------------------------------------------------------------------------------------------------------------------------------------------------------------|-----------------------------------|
| Hazard identification   | 1  | What adverse outcomes are associated with exposure to PCDD/Fs and DL-PCBs in humans?                                                                                                      | Structured approach A             |
| Hazard identification   | 2  | What adverse outcomes are caused by exposure to PCDD/Fs and DL-PCBs in experimental animals?                                                                                              | Narrative approach                |
| Hazard identification   | 3  | Which adverse outcomes occur following exposure to PCDD/Fs and DL-PCBs in experimental animals at body burdens measured/estimated to be lower than 100 ng WHO <sub>2005</sub> -TEQ/kg bw? | Structured approach B             |
| Hazard identification   | 4  | Are PCDD/Fs and DL-PCBs genotoxic?                                                                                                                                                        | Narrative approach                |
| Hazard characterisation | 5  | What is the absorption, distribution, metabolism and excretion (ADME) of the target compounds in humans?                                                                                  | Structured approach C             |
| Hazard characterisation | 6  | What is the ADME of the target compounds in experimental animal species/strains?                                                                                                          | Structured approach D             |
| Hazard characterisation | 7  | What is the difference in ADME of the target compounds between humans and experimental animals?                                                                                           | Informed by sub-questions 5 and 6 |
| Hazard characterisation | 8  | What is the dose-response relationship between PCDD/Fs and DL-PCBs and relevant endpoints in humans?                                                                                      | Structured approach A             |

<sup>1</sup> The total amount of a chemical in the body.



| Risk assessment step    | N. | Risk assessment sub-questions                                                                                                                                                                                | Approach                           |
|-------------------------|----|--------------------------------------------------------------------------------------------------------------------------------------------------------------------------------------------------------------|------------------------------------|
| Hazard characterisation | 9  | What is the dose-response relationship between PCDD/Fs and DL-PCBs and relevant endpoints in experimental animals at body burdens measured/estimated to be lower than 100 ng WHO <sub>2005</sub> -TEQ/kg bw? | Structured approach B              |
| Hazard characterisation | 10 | What molecular mechanisms can explain the observed adverse effects?                                                                                                                                          | Narrative approach                 |
| Exposure assessment     | 11 | What are the levels of PCDD/Fs and DL-PCBs in food in Europe?                                                                                                                                                | Structured approach E              |
| Exposure assessment     | 12 | What is the effect of processing on the levels of PCDD/Fs and DL-PCBs in food?                                                                                                                               | Narrative approach                 |
| Exposure assessment     | 13 | What are the consumption levels of foods among the target European population?                                                                                                                               | Structured approach F              |
| Exposure assessment     | 14 | What is the estimate of exposure to PCDD/Fs and DL-PCBs from the diet in the target European population?                                                                                                     | Informed by Sub-question 11 and 13 |
| Exposure assessment     | 15 | What are the concentrations of PCDD/Fs and DL-PCBs in, e.g. blood, breast milk, adipose tissue, placenta in the target European population?                                                                  | Narrative approach                 |

bw: body weight; DL-PCBs: dioxin-like polychlorinated biphenyls; PCDD/Fs: polychlorinated dibenzo-*p*-dioxins/dibenzofurans; TEQ: toxic equivalents; WHO: World Health Organization.

**Table 3.** Farm and companion animals risk assessment sub-questions to be answered

| Risk assessment step    | N. | Risk assessment sub-questions                                                                                              | Approach                            |
|-------------------------|----|----------------------------------------------------------------------------------------------------------------------------|-------------------------------------|
| Hazard identification   | 16 | What adverse outcomes are caused by exposure to PCDD/Fs and DL-PCBs in farm and companion animals?                         | Structured approach G               |
| Hazard characterisation | 17 | What are the dose-response relationships between PCDD/Fs and DL-PCBs and relevant endpoints in farm and companion animals? | Structured approach G               |
| Hazard characterisation | 18 | What is the ADME of the target compounds in the different farm and companion animal species?                               | Structured approach H               |
| Hazard characterisation | 19 | What is the transfer of PCDD/Fs and DL-PCBs from feed to products of animal origin?                                        | Structured approach H               |
| Hazard characterisation | 20 | What levels in feed result in non-compliant levels in food?                                                                | Informed by sub-questions 18 and 19 |
| Exposure assessment     | 21 | What are the levels of PCDD/Fs and DL-PCBs in feed in Europe?                                                              | Structured approach E               |
| Exposure assessment     | 22 | What are the consumption levels of feeds among the farm and companion animals?                                             | Narrative approach                  |
| Exposure assessment     | 23 | What is the estimate of exposure to PCDD/Fs and DL-PCBs from the diet in the target farm and companion animal populations? | Informed by sub-questions 21 and 22 |

ADME: absorption, distribution, metabolism and excretion; DL-PCBs: dioxin-like polychlorinated biphenyls; PCDD/Fs: polychlorinated dibenzo-*p*-dioxins/dibenzofurans.

### A.1.2. Method to address the hazard identification and characterisation sub-questions

#### A.1.2.1. Narrative approach to evidence identification, selection and appraisal

Sub-question 2 will be addressed narratively by a literature search carried out to identify review/meta-analysis/systematic review papers relevant for the hazard identification of PCDD/Fs and DL-PCBs in



experimental animals. These will be screened and evaluated by relevant domain experts from the Working Group. For details of the search strategy, see Table 4.

**Table 4.** Preliminary keywords for the narrative approach to address sub-question 2 (hazard identification all doses experimental animals)

|                             |                                                                                                      |
|-----------------------------|------------------------------------------------------------------------------------------------------|
| <b>Database</b>             | Web of Science™                                                                                      |
| <b>Preliminary keywords</b> | Dioxins, Tetrachlorodibenzodioxin, Polychlorinated Biphenyls, Dioxin-like, TEQ, Coplanar, PCBs, TCDD |

Sub-question 4 will be addressed narratively. The genotoxicity of TCDD, as well as that of other PCDD/Fs and DL-PCBs, has been studied intensively (IARC, 1997; ATSDR 1998). The evidence for the genotoxicity of PCDD/Fs and DL-PCBs is negative or equivocal for a large range of *in vitro* and *in vivo* end points. Therefore, a literature search will be carried out to identify review/meta-analysis/systematic review papers relevant to the genotoxicity of the target compounds, as well as other peer-reviewed single studies published in the open literature that will be screened and evaluated by relevant domain experts from the Working Group. For details of the search strategy see Table 5.

**Table 5.** Preliminary search strings for the narrative approach to address sub-question 4 (genotoxicity)

|                             |                                                                                                                                                                                                                                                                                                                                                                                                             |
|-----------------------------|-------------------------------------------------------------------------------------------------------------------------------------------------------------------------------------------------------------------------------------------------------------------------------------------------------------------------------------------------------------------------------------------------------------|
| <b>Database</b>             | Web of Science™                                                                                                                                                                                                                                                                                                                                                                                             |
| <b>Preliminary Keywords</b> | Micronucleus, Gene mutations, Mutagenicity, Single strand breaks, DNA damage, Oxidative DNA damage, DNA repair, Chromosomal breaks/deletions/aberrations, Unscheduled DNA synthesis, Clastogenic, Polyploidy, nongenotoxicity, nongenotoxic, Epigenetic, Gene methylation, Transgenerational <b>AND</b> Dioxins, Tetrachlorodibenzodioxin, TCDD, Polychlorinated Biphenyls, Dioxin-like, TEQ, Coplanar, PCB |

Sub-question 10 will be addressed narratively by a literature search to be carried out to identify review/meta-analysis/systematic review papers relevant to inform the modes of action of the target compounds, as well as other peer-reviewed single studies published in the open literature that will be screened and evaluated by relevant domain experts from the Working Group. This task will be performed by EFSA/Working Group members. For details of the literature search, see Table 6.

**Table 6.** Preliminary key words for the narrative approach to address sub-question 10 (mode of action)

|                             |                                                                                                                                                                                                                                                                                                                                                                                                                                                                                                          |
|-----------------------------|----------------------------------------------------------------------------------------------------------------------------------------------------------------------------------------------------------------------------------------------------------------------------------------------------------------------------------------------------------------------------------------------------------------------------------------------------------------------------------------------------------|
| <b>Database</b>             | Web of Science™                                                                                                                                                                                                                                                                                                                                                                                                                                                                                          |
| <b>Preliminary keywords</b> | Ah receptor, aryl hydrocarbon receptor, AhR, structure, phylogenesis, signal transduction, gene regulation, response element, genomic pathway, non-genomic pathway, alternative pathway, nuclear receptor, protein-protein interactions, DNA-protein interactions, cross-talk, ARNT, AHRR, chaperone, co-activator, co-repressor, AhR-knockout, AhR-deficient <b>AND</b> Dioxins, Tetrachlorodibenzodioxin, Polychlorinated Biphenyls, Dioxin-like, TEQ, Coplanar, Polychlorinated biphenyls, PCBs, TCDD |

For these narrative approaches, the scientific citation research platform interrogated will be Web Of Science™, encompassing the databases described in Section A.1.2.2.2 below and covering the vast majority of the published relevant studies. The output will be exported into a reference management software, i.e. Endnote X7 file.

### A.1.2.2. Structured approach to evidence identification, selection and appraisal

**Structured approach A** will address sub-questions 1 and 8 on the adverse effects of the target compounds in humans by performing an extensive literature search (ELS) followed by a selection of relevant evidence based on eligibility criteria (see Table 7 below), and a structured appraisal and synthesis of the relevant evidence. This task will be carried out by an external contractor.

**Structured approach B** will address sub-questions 3 and 9 on the adverse effects of the target compounds in experimental animals at low doses, by performing an ELS and selection of relevant studies (see Table 8 below) to identify which are the adverse effects that occur following exposure to the target compounds in experimental animals at body burdens measured/estimated to be lower than 100 ng WHO<sub>2005</sub>-TEQs/kg bw, i.e. at levels in the range of or lower than the body burdens previously used to derive HBGVs. The eligible studies will be appraised and synthesised following a structured approach. The outcome of this approach will also inform sub-question 2 in case effects not previously described are reported to occur at low levels (i.e. body burdens measured/estimated to be not higher than 100 ng WHO<sub>2005</sub>-TEQ/kg bw). This task will be carried out by an external contractor.

**Structured approach C and D** will address sub-questions 5 and 6 related to the toxicokinetics of the target compounds in humans and experimental animals, respectively, by performing two ELS to define differences related to inter-species toxicokinetics, including inter-individual variability, that need to be taken into account when establishing a health-based guidance value (see Tables 9 and 10 below). This includes potential toxicokinetic models for experimental animals and humans. The evidence will be then appraised and described in a narrative way. This task will be performed by EFSA/Working Group members.

**Structured approach G** will address sub-questions 16 and 17 on the adverse effects of the target compounds in farm and companion animals, by performing an ELS, followed by a selection of relevant evidence (see Table 11 below), and a structured synthesis and appraisal of the relevant evidence. This task will be performed by EFSA/Working Group members.

**Structured approach H** will address sub-questions 18 and 19 by performing an ELS to identify information on the toxicokinetics of the target compounds in the farm and companion animals considered, and the transfer of these contaminants from feed to animal-derived food products (see **Table 12** below). Soil, as a possible source of the target compounds, will also be considered. The evidence will be described in a narrative way. This task will be performed by EFSA/Working Group members.

#### A.1.2.2.1. Review questions and eligibility criteria for study selection

The selection of the studies relevant to the sub-questions addressed by a structured approach will be performed using the eligibility criteria described in the Tables 7-12 below.

**Table 7.** Eligibility criteria for the **structured approach A** (sub-questions 1 and 8)

| Sub-question 1 - <b>What adverse outcomes are associated with exposure to PCDD/Fs and DL-PCBs in humans?</b>                 |     |                                                                                                                                                                                                                                                                                                                                                                     |
|------------------------------------------------------------------------------------------------------------------------------|-----|---------------------------------------------------------------------------------------------------------------------------------------------------------------------------------------------------------------------------------------------------------------------------------------------------------------------------------------------------------------------|
| Sub-question 8 - <b>What is the dose-response relationship between PCDD/Fs and DL-PCBs and relevant endpoints in humans?</b> |     |                                                                                                                                                                                                                                                                                                                                                                     |
| <b>Study design</b>                                                                                                          | In  | Cross-sectional studies<br>Cohort studies<br>Case-control studies (retrospective and nested)<br>Case series/Case reports <sup>(d)</sup>                                                                                                                                                                                                                             |
|                                                                                                                              | Out | Animal studies<br><i>In vitro</i> studies                                                                                                                                                                                                                                                                                                                           |
| <b>Study characteristics:</b>                                                                                                | In  | Any study duration<br>Any number of subjects                                                                                                                                                                                                                                                                                                                        |
|                                                                                                                              | Out | /                                                                                                                                                                                                                                                                                                                                                                   |
| <b>Population</b>                                                                                                            | In  | All populations groups, all ages, males and females<br>Study location: all countries                                                                                                                                                                                                                                                                                |
|                                                                                                                              | Out | /                                                                                                                                                                                                                                                                                                                                                                   |
| <b>Exposure/intervention</b>                                                                                                 | In  | All routes of exposure (dietary, dermal, inhalation, transplacental exposure).<br>Studies in which levels of the following target compounds have been measured in human tissues (including by bioassays),<br>OR<br>Studies in which the total dietary exposure to the following target compounds has been estimated <sup>(a)</sup> ,<br>– 17 PCDD/Fs and 12 DL-PCBs |
|                                                                                                                              | Out | /                                                                                                                                                                                                                                                                                                                                                                   |

|                                     |     |                                                                                                                                                                                                                                                                                                              |
|-------------------------------------|-----|--------------------------------------------------------------------------------------------------------------------------------------------------------------------------------------------------------------------------------------------------------------------------------------------------------------|
|                                     |     | <ul style="list-style-type: none"> <li>- 17 PCDD/Fs</li> <li>- 12 DL-PCBs</li> <li>- 17 PCDD/Fs plus non-<i>ortho</i> PCBs, at least one PCB being PCB-126</li> <li>- TCDD (when dominates the TEQs, as in the Seveso incident) or any of the individual target congeners that dominates the TEQs</li> </ul> |
|                                     | Out | Studies on mono- <i>ortho</i> PCBs only<br>Studies on non dioxin-like (indicator) PCBs <sup>(b)</sup><br>Studies on mixtures in which the contribution from the target compounds does not allow the calculation of TEQs                                                                                      |
| <b>Specific outcome of interest</b> | In  | All endpoints, including hormone levels                                                                                                                                                                                                                                                                      |
|                                     | Out | Studies on gene expression only<br>Studies on drug metabolising enzyme activity/levels only                                                                                                                                                                                                                  |
| <b>Language</b>                     | In  | English                                                                                                                                                                                                                                                                                                      |
| <b>Time</b>                         | In  | From 1998 onwards                                                                                                                                                                                                                                                                                            |
| <b>Publication type</b>             | In  | Peer-reviewed primary research studies (i.e. studies generating new data)<br>Systematic reviews, reviews and meta-analyses <sup>(c)</sup>                                                                                                                                                                    |
|                                     | Out | Expert opinions, editorials, and letters to the editor<br>PhD Theses<br>Extended abstracts, conference proceedings                                                                                                                                                                                           |

DL-PCBs: dioxin-like polychlorinated biphenyls; PCB: dioxin-like polychlorinated biphenyl; PCDD/Fs: polychlorinated dibenzo-*p*-dioxins/dibenzofurans; TCDD: 2,3,7,8- tetrachlorodibenzo-*p*-dioxin; TEQ: toxic equivalents.

(a): Although these studies will not serve for the hazard characterisation, they are informative and serve as supporting information.

(b): Indicator PCBs: PCB-28, -52, -101, -138, -153, and -180.

(c): Systematic reviews, reviews and meta-analysis will be included and used as background information. These types of publications will not go through the data extraction process.

(d): Case series/case report studies will be included to inform the hazard identification. This type of studies will not go through the data extraction process.

**Table 8.** Eligibility criteria for the **structured approach B** (sub-questions 3 and 9)

|                                                                                                                                                                                                                                    |     |                                                                                                                                                                                                                                                                                                                                                                                                                                                                                                                                                                                                                                                                  |
|------------------------------------------------------------------------------------------------------------------------------------------------------------------------------------------------------------------------------------|-----|------------------------------------------------------------------------------------------------------------------------------------------------------------------------------------------------------------------------------------------------------------------------------------------------------------------------------------------------------------------------------------------------------------------------------------------------------------------------------------------------------------------------------------------------------------------------------------------------------------------------------------------------------------------|
| <b>Sub-question 3 – Which adverse outcomes occur following exposure to PCDD/Fs and DL-PCBs in experimental animals at body burdens measured/estimated to be lower than 100 ng WHO<sub>2005</sub>-TEQ/kg bw?</b>                    |     |                                                                                                                                                                                                                                                                                                                                                                                                                                                                                                                                                                                                                                                                  |
| <b>Sub-question 9 - What is the dose-response relationship between PCDD/Fs and DL-PCBs and relevant endpoints in experimental animals at body burdens measured/estimated to be lower than 100 ng WHO<sub>2005</sub>-TEQ/kg bw?</b> |     |                                                                                                                                                                                                                                                                                                                                                                                                                                                                                                                                                                                                                                                                  |
| <b>Study design</b>                                                                                                                                                                                                                | In  | Experimental animal studies (e.g. rats, mice, monkeys, guinea pig, mini pigs, rabbit, hamster, dog, cat, mink)<br>Including <sup>(a)</sup> TCDD-sensitive and resistant animals, and<br>In relation to metabolic effects, including: <ul style="list-style-type: none"> <li>• diabetic animal models,</li> <li>• animals on high/low fat diets,</li> <li>• lean/obese animals,</li> </ul> In relation to immunotox endpoint, including: <ul style="list-style-type: none"> <li><input type="checkbox"/> Lupus-like autoimmune animals</li> <li><input type="checkbox"/> Immunised animals</li> <li><input type="checkbox"/> Pathogen infected animals</li> </ul> |
|                                                                                                                                                                                                                                    | Out | Studies on transgenic animals <sup>(b)</sup><br>Human studies<br><i>In vitro</i> studies                                                                                                                                                                                                                                                                                                                                                                                                                                                                                                                                                                         |
| <b>Study characteristics:</b>                                                                                                                                                                                                      | In  | Any study duration<br>Any number of animals                                                                                                                                                                                                                                                                                                                                                                                                                                                                                                                                                                                                                      |
|                                                                                                                                                                                                                                    | Out | /                                                                                                                                                                                                                                                                                                                                                                                                                                                                                                                                                                                                                                                                |
| <b>Population</b>                                                                                                                                                                                                                  | In  | Any experimental animal study, all ages, males and females                                                                                                                                                                                                                                                                                                                                                                                                                                                                                                                                                                                                       |
|                                                                                                                                                                                                                                    | Out | /                                                                                                                                                                                                                                                                                                                                                                                                                                                                                                                                                                                                                                                                |
| <b>Exposure/ intervention</b>                                                                                                                                                                                                      | In  | <u>Route of administration:</u> Oral (feeding, gavage studies), inhalation, <i>s.c.</i> , <i>i.p.</i> , <i>i.m.</i><br><u>Compounds:</u> Levels measured in animal tissues (including by bioassays) of any of the 17 2,3,7,8-substituted PCDD/Fs and/or 12 DL-PCBs, administered individually or as mixtures OR Estimated exposure validated<br><u>Number of doses:</u> single or repeated administration<br><u>Dose groups:</u> ≥ 2 dose groups + control group<br><u>Cut-off values:</u> studies in which the lowest measured/estimated body burden is not                                                                                                     |

|                                     |     |                                                                                                                                                                                                                                                                                                      |
|-------------------------------------|-----|------------------------------------------------------------------------------------------------------------------------------------------------------------------------------------------------------------------------------------------------------------------------------------------------------|
|                                     | Out | higher than 100 ng WHO <sub>2005</sub> -TEQ/kg bw<br>Dermal application<br>Studies on non dioxin-like (indicator) PCBs <sup>(c)</sup><br>Studies on mixtures with compounds other than the target PCDD/Fs and DL-PCBs (e.g. organochlorinated compounds, brominated flame retardants, etc).          |
| <b>Specific outcome of interest</b> | In  | All endpoints                                                                                                                                                                                                                                                                                        |
|                                     | Out | Studies on enzyme induction only (e.g. CYP modulation)<br>Studies on gene expression only<br>Studies on co-administration of pro-carcinogens (CON A, DMBA, NKK) only<br>Studies on -omics profiles<br>Studies on the protective effects of certain substances against PCDD/Fs and/or DL-PCB toxicity |
| <b>Language</b>                     | In  | English                                                                                                                                                                                                                                                                                              |
| <b>Time</b>                         | In  | From 1998 onwards                                                                                                                                                                                                                                                                                    |
| <b>Publication type</b>             | In  | Peer-reviewed primary research studies (i.e. studies generating new data)<br>Systematic reviews, reviews and meta-analyses <sup>(d)</sup>                                                                                                                                                            |
|                                     | Out | Expert opinions, editorials, and letters to the editor.<br>PhD Theses<br>Extended abstracts, conference proceedings                                                                                                                                                                                  |

bw: body weight; CYP: cytochrome P450; DL-PCBs: dioxin-like polychlorinated biphenyls; *i.m.*: intramuscular; *i.p.*: intraperitoneal; PCB: dioxin-like polychlorinated biphenyl; PCDD/Fs: polychlorinated dibenzo-*p*-dioxins/dibenzofurans; *s.c.*: subcutaneous; TCDD: 2,3,7,8- tetrachlorodibenzo-*p*-dioxin; TEQ: toxic equivalents.

(a): It is considered that these studies are informative, although they may not necessarily be directly used for hazard characterization.

(b): It is considered that studies on transgenic animals are helpful in terms of mechanism of action but these are not informative in terms of risk assessment.

(c): Indicator PCBs: PCB-28, -52, -101, -138, -153, and -180.

(d): Systematic reviews, reviews and meta-analysis will be included and used as background information. These types of publications will not go through the data extraction process.

**Table 9.** Eligibility criteria for the **structured approach C** (sub-question 5)

| Sub-question 5 – What is the ADME of the target compounds in humans? |     |                                                                                                                                                                 |
|----------------------------------------------------------------------|-----|-----------------------------------------------------------------------------------------------------------------------------------------------------------------|
| <b>Study design / Test system</b>                                    | In  | <i>In vivo</i> studies in humans                                                                                                                                |
|                                                                      | Out | <i>In vivo</i> studies in experimental animals<br><i>In vivo</i> studies in farm and companion animals<br><i>In vitro</i> studies in human culture cells/models |
| <b>Exposure/ intervention</b>                                        | In  | Any of the 17 2,3,7,8-substituted PCDD/Fs and/or 12 DL-PCBs, individually or as mixtures                                                                        |
|                                                                      | Out | Studies on mixtures with compounds other than the target PCDD/Fs and DL-PCBs (e.g. organochlorinated compounds, brominated flame retardants, etc)               |
| <b>Specific outcome of interest</b>                                  | In  | Any outcome related to the ADME of the target compounds                                                                                                         |
| <b>Language</b>                                                      | In  | English                                                                                                                                                         |
| <b>Time</b>                                                          | In  | From 1998 onwards                                                                                                                                               |
| <b>Publication type</b>                                              | In  | Peer-reviewed primary research studies (i.e. studies generating new data)<br>Systematic reviews, reviews and meta-analyses                                      |
|                                                                      | Out | Expert opinions, editorials, and letters to the editor<br>PhD Theses<br>Extended abstracts, conference proceedings                                              |

ADME: absorption, distribution, metabolism and excretion; DL-PCBs: dioxin-like polychlorinated biphenyls; PCDD/Fs: polychlorinated dibenzo-*p*-dioxins/dibenzofurans.

**Table 10.** Eligibility criteria for the **structured approach D** (sub-question 6)

| Sub-question 6 – What is the ADME of the target compounds in experimental animals? |     |                                                                                                                                                                  |
|------------------------------------------------------------------------------------|-----|------------------------------------------------------------------------------------------------------------------------------------------------------------------|
| <b>Study design / Test system</b>                                                  | In  | <i>In vivo</i> studies in experimental animals                                                                                                                   |
|                                                                                    | Out | <i>In vivo</i> studies in farm and companion animals<br><i>In vivo</i> studies in humans<br><i>In vitro</i> studies in experimental animals culture cells/models |
| <b>Exposure/ intervention</b>                                                      | In  | Any of the 17 2,3,7,8-substituted PCDD/Fs and/or 12 DL-PCBs, individually or as mixtures                                                                         |
|                                                                                    | Out | Studies on mixtures with compounds other than the target PCDD/Fs and DL-PCBs (e.g. organochlorinated compounds, brominated flame retardants, etc)                |
| <b>Specific outcome of interest</b>                                                | In  | Any outcome related to the ADME of the target compounds                                                                                                          |
| <b>Language</b>                                                                    | In  | English                                                                                                                                                          |
| <b>Time</b>                                                                        | In  | From 1998 onwards                                                                                                                                                |
| <b>Publication type</b>                                                            | In  | Peer-reviewed primary research studies (i.e. studies generating new data)<br>Systematic reviews, reviews and meta-analyses                                       |
|                                                                                    | Out | Expert opinions, editorials, and letters to the editor<br>PhD Theses<br>Extended abstracts, conference proceedings                                               |

ADME: absorption, distribution, metabolism and excretion; DL-PCBs: dioxin-like polychlorinated biphenyls; PCB: dioxin-like polychlorinated biphenyl; PCDD/Fs: polychlorinated dibenzo-*p*-dioxins/dibenzofurans.

**Table 11.** Eligibility criteria for the **structured approach G** (sub-questions 16 and 17)

| Sub-question 16 - Is there an association between dietary exposure to PCDD/Fs and DL-PCBs and adverse effects in the farm and companion animal target populations? |     |                                                                                                                                                                                                                                                                                                                                                                                                                                                                                                                                                                                                                                                                                                                                                                                                                                                                                 |
|--------------------------------------------------------------------------------------------------------------------------------------------------------------------|-----|---------------------------------------------------------------------------------------------------------------------------------------------------------------------------------------------------------------------------------------------------------------------------------------------------------------------------------------------------------------------------------------------------------------------------------------------------------------------------------------------------------------------------------------------------------------------------------------------------------------------------------------------------------------------------------------------------------------------------------------------------------------------------------------------------------------------------------------------------------------------------------|
| Sub-question 17 - What are the dose-response relationships between PCDD/Fs and DL-PCBs and relevant endpoints in farm and companion animals?                       |     |                                                                                                                                                                                                                                                                                                                                                                                                                                                                                                                                                                                                                                                                                                                                                                                                                                                                                 |
| <b>Study design / Test system</b>                                                                                                                                  | In  | Studies on adverse effects in the following species: <ul style="list-style-type: none"> <li>– Ruminants: cows, sheep, goat, cattle, buffalo, bovine</li> <li>– Pigs: swine</li> <li>– Poultry: chicken, turkeys, goose, ducks, quails</li> <li>– Rabbits (<i>captured in the experimental animal search</i>)</li> <li>– Fish: trout, salmon, seabass, seabream, turbot, carp, eel, tilapia, cod, halibut, sturgeon</li> <li>– Horses</li> <li>– Companion animals (cats and dogs) (<i>captured in the experimental animal search</i>)</li> <li>– Fur animals (mink) (<i>captured in the experimental animal search</i>)</li> </ul>                                                                                                                                                                                                                                              |
|                                                                                                                                                                    | Out | <i>In vitro</i> studies<br>Human studies<br>Studies in experimental animals<br>Studies in experimental fish species (e.g. zebrafish, medaka)                                                                                                                                                                                                                                                                                                                                                                                                                                                                                                                                                                                                                                                                                                                                    |
| <b>Exposure/ intervention</b>                                                                                                                                      | In  | <u>Route of administration</u> : oral, inhalation, <i>s.c.</i> , <i>i.p.</i> , <i>in ovo</i><br><u>Compounds</u> : Levels measured in animal tissues (including by bioassays) of any of the 17 2,3,7,8-substituted PCDD/Fs and/or 12 DL-PCBs, administered individually or as mixtures OR Estimated exposure from feed (either reported or can be calculated)<br><u>Number of doses</u> : single or repeated exposure<br><u>Dose groups</u> : ≥ 1 dose groups + control group<br>Field exposure studies in which the following target compounds have been analysed: <ul style="list-style-type: none"> <li>– 17 PCDD/Fs and 12 DL-PCBs</li> <li>– 17 PCDD/Fs</li> <li>– 12 DL-PCBs</li> <li>– 17 PCDD/Fs plus non-<i>ortho</i> PCBs, at least one PCB being PCB-126</li> <li>– TCDD (when dominates the TEQs) or any of the target congeners that dominates the TEQs</li> </ul> |
|                                                                                                                                                                    | Out | Studies on non dioxin-like (indicator) PCBs <sup>(a)</sup><br>Studies on mixtures with compounds other than the target PCDD/Fs and DL-PCBs (e.g. organochlorinated compounds, brominated flame retardants, etc).                                                                                                                                                                                                                                                                                                                                                                                                                                                                                                                                                                                                                                                                |

|                                     |     |                                                                                                                                           |
|-------------------------------------|-----|-------------------------------------------------------------------------------------------------------------------------------------------|
| <b>Specific outcome of interest</b> | In  | Any outcome                                                                                                                               |
|                                     | Out | Studies on enzyme induction only (e.g. EROD)<br>Studies on gene expression only<br>Studies on CYP modulation only                         |
| <b>Language</b>                     | In  | English                                                                                                                                   |
| <b>Time</b>                         | In  | From 1950 onwards                                                                                                                         |
| <b>Publication type</b>             | In  | Peer reviewed primary research studies (i.e. studies generating new data)<br>Systematic reviews, reviews and meta-analysis <sup>(b)</sup> |
|                                     | Out | Expert opinions, editorials, letters to the editor<br>PhD theses<br>Extended abstracts, conference proceedings                            |

CYP: cytochrome P450; DL-PCBs: dioxin-like polychlorinated biphenyls; *i.p.*: intraperitoneal; PCB: dioxin-like polychlorinated biphenyl; PCDD/Fs: polychlorinated dibenzo-*p*-dioxins/dibenzofurans; *s.c.*: subcutaneous; TCDD: 2,3,7,8- tetrachlorodibenzo-*p*-dioxin; TEQ: toxic equivalents.

(a): Indicator PCBs: PCB-28, -52, -101, -138, -153, and -180.

(b): Systematic reviews, reviews and meta-analysis will be included and used as background information. These types of publication will not go through the data extraction process.

**Table 12.** Eligibility criteria for the **structured approach H** (sub-question 18 and 19)

|                                                                                                                      |     |                                                                                                                                                                                                               |
|----------------------------------------------------------------------------------------------------------------------|-----|---------------------------------------------------------------------------------------------------------------------------------------------------------------------------------------------------------------|
| <b>Sub-question 17 – What is the ADME of PCDD/Fs and DL-PCBs in the different farm and companion animal species?</b> |     |                                                                                                                                                                                                               |
| <b>Sub-question 18 – What is the transfer of PCDD/Fs and DL-PCBs from feed to products of animal origin?</b>         |     |                                                                                                                                                                                                               |
| <b>Study design / Test system</b>                                                                                    | In  | <i>In vivo</i> studies in farm and companion animals                                                                                                                                                          |
|                                                                                                                      | Out | <i>In vivo</i> studies in experimental animals<br><i>In vivo</i> studies in humans<br><i>In vitro</i> studies in farm/companion animal culture cells/models                                                   |
| <b>Exposure/ intervention</b>                                                                                        | In  | Any of the 17 2,3,7,8-substituted PCDD/Fs and/or 12 DL-PCBs, individually or as mixtures                                                                                                                      |
|                                                                                                                      | Out | Studies on non dioxin-like (indicator) PCBs <sup>2</sup><br>Studies on mixtures with compounds other than the target PCDD/Fs and DL-PCBs (e.g. organochlorinated compounds, brominated flame retardants, etc) |
| <b>Specific outcome of interest</b>                                                                                  | In  | Any outcome related to the ADME of the target compounds and their transfer from the feed to the products of animal origin                                                                                     |
| <b>Language</b>                                                                                                      | In  | English                                                                                                                                                                                                       |
| <b>Time</b>                                                                                                          | In  | From 1950 onwards                                                                                                                                                                                             |
| <b>Publication type</b>                                                                                              | In  | Peer-reviewed primary research studies (i.e. studies generating new data)<br>Systematic reviews, reviews and meta-analyses                                                                                    |
|                                                                                                                      | Out | Expert opinions, editorials, and letters to the editor<br>PhD Theses<br>Extended abstracts, conference proceedings                                                                                            |

ADME: absorption, distribution, metabolism and excretion; DL-PCBs: dioxin-like polychlorinated biphenyls; PCB: dioxin-like polychlorinated biphenyl; PCDD/Fs: polychlorinated dibenzo-*p*-dioxins/dibenzofurans.

#### A.1.2.2.2. Literature searches

The ELSs will be performed searching the following bibliographic databases or scientific citation research platforms:

1. PubMed
2. Web of Science<sup>TM</sup>, encompassing the following databases:
  - Web of Science<sup>TM</sup> Core Collection
  - BIOSIS Citation Index<sup>SM</sup>
  - CABI: CAB Abstracts<sup>®</sup>
  - Current Contents Connect<sup>®</sup>
  - Data Citation Index<sup>SM</sup>
  - FSTA<sup>®</sup> – the food science resource

<sup>2</sup> Indicator PCBs: PCB-28, -52, -101, -138, -153, and -180.



- MEDLINE®
- SciELO Citation Index
- Zoological Record®

For the structured approaches A and B, the ELS will be performed by an external contractor. The Working Group will agree on the draft preliminary keywords that will be provided to the external contractor (Table 13 for structured approach A and Table 14 for structured approach B) who will develop search strings. The final version of the search strings will, ultimately, be agreed by the Working Group.

**Table 13.** Databases and preliminary keywords for the ELS in **structured approach A** (sub-question 1 and 8, hazard identification and characterisation in humans)

|                             |                                                                                                                                                                                                                                                             |
|-----------------------------|-------------------------------------------------------------------------------------------------------------------------------------------------------------------------------------------------------------------------------------------------------------|
| <b>Database</b>             | Web of Science™<br>PubMed                                                                                                                                                                                                                                   |
| <b>Preliminary Keywords</b> | Dioxins, Tetrachlorodibenzodioxin, TCDD, Dioxin-like, TEQ, Coplanar, Polychlorinated biphenyls, PCBs <b>AND</b> Epidemiology, Cohort Studies, Case-Control Studies, adverse effects, Observational Study, Cross-Sectional Studies, case series/case reports |

**Table 14.** Databases and preliminary keywords for the ELS in structured approach B (sub-questions 3 and 9, hazard identification and characterisation in experimental animal studies)

|                             |                                                                                                                                                                                          |
|-----------------------------|------------------------------------------------------------------------------------------------------------------------------------------------------------------------------------------|
| <b>Database</b>             | Web of Science™<br>PubMed                                                                                                                                                                |
| <b>Preliminary Keywords</b> | Dioxins, Tetrachlorodibenzodioxin, Dioxin-like, TEQ, Coplanar, Polychlorinated biphenyls, PCBs <b>AND</b> Rats, Mice, Monkey, Guinea pigs, Mini pigs, Rabbits, Hamster, Dogs, Cats, Mink |

For the structured approaches C (ADME in humans), D (ADME in experimental animals), G (HI/HC in farm and companion animals) and H (ADME and transfer in farm/companion animals), the ELS will be performed by the EFSA/Working Group. The preliminary keywords are reported in Table 15 for structured approach C, Table 16 for structured approach D, Table 17 for structured approach G and Table 18 for structured approach H.

**Table 15.** Preliminary search strings for **structured approach C** (sub-question 5, Toxicokinetics/ADME in humans)

|                             |                                                                                                                                                                                                                                                                                                                                          |
|-----------------------------|------------------------------------------------------------------------------------------------------------------------------------------------------------------------------------------------------------------------------------------------------------------------------------------------------------------------------------------|
| <b>Database</b>             | Web of Science™<br>PubMed                                                                                                                                                                                                                                                                                                                |
| <b>Preliminary keywords</b> | Dioxins, Tetrachlorodibenzodioxin, Dioxin-like, TEQ, Coplanar, Polychlorinated biphenyls, PCBs <b>AND</b> Half-life, absorption, absorption rate, distribution, metabolism, excretion, elimination, bioconcentration, BCFs, PBPK, PBK, modelling, carry-over, transfer, placental transfer, human milk, <b>AND</b> Humans, child, infant |

**Table 16.** Preliminary search strings for Structured approach D (sub-question 6, Toxicokinetics/ADME in experimental animals)

|                             |                                                                                                                                                                                                                                                                                                                                                                                     |
|-----------------------------|-------------------------------------------------------------------------------------------------------------------------------------------------------------------------------------------------------------------------------------------------------------------------------------------------------------------------------------------------------------------------------------|
| <b>Database</b>             | Web of Science™<br>PubMed                                                                                                                                                                                                                                                                                                                                                           |
| <b>Preliminary keywords</b> | Dioxins, Tetrachlorodibenzodioxin, Dioxin-like, TEQ, Coplanar, Polychlorinated biphenyls, PCBs <b>AND</b> Half-life, absorption, absorption rate, distribution, metabolism, excretion, elimination, bioconcentration, BCFs, PBPK, PBK, modelling, carry-over, transfer, placental transfer <b>AND</b> Rats, mice, monkey guinea pigs, mini pigs, rabbits, hamster, dogs, cats, mink |



**Table 17.** Preliminary search strings for **structured approach G** (sub-question 16 and 17, Hazard identification and characterisation in farm and companion animal studies)

|                             |                                                                                                                                                                                                                                                                                                                                   |
|-----------------------------|-----------------------------------------------------------------------------------------------------------------------------------------------------------------------------------------------------------------------------------------------------------------------------------------------------------------------------------|
| <b>Database</b>             | PubMed<br>Web of Science™                                                                                                                                                                                                                                                                                                         |
| <b>Preliminary keywords</b> | Dioxins, Tetrachlorodibenzodioxin, Dioxin-like, TEQ, Coplanar, Polychlorinated biphenyls, PCBs <b>AND</b> Ruminants, Cattle, cows, bovine, Sheep, goats, buffaloes, swine, pigs, poultry, chickens, turkeys, ducks, Quail, Goose, Rabbits, Fish, Trout, Salmon, Sea Bream, Sea Bass, sturgeon, Flatfish, Horses, Cats, Dogs, mink |

**Table 18.** Preliminary search strings for **structured approach H** (sub-question 18 and 19, Toxicokinetics/ADME/transfer in farm and companion animals)

|                             |                                                                                                                                                                                                                                                                                                                                                                                                                                                                                                                                             |
|-----------------------------|---------------------------------------------------------------------------------------------------------------------------------------------------------------------------------------------------------------------------------------------------------------------------------------------------------------------------------------------------------------------------------------------------------------------------------------------------------------------------------------------------------------------------------------------|
| <b>Database</b>             | Web of Science™<br>PubMed                                                                                                                                                                                                                                                                                                                                                                                                                                                                                                                   |
| <b>Preliminary keywords</b> | Dioxins, Tetrachlorodibenzodioxin, Dioxin-like, TEQ, Coplanar, Polychlorinated biphenyls, PCBs <b>AND</b> Half-life, absorption, absorption rate, distribution, metabolism, excretion, elimination, bioconcentration, BCFs, PBPK, PBK, modelling, carry-over, transfer, placental transfer, <b>AND</b> Ruminants, Cattle, cows, bovine, Sheep, goats, buffaloes, swine, pigs, poultry, chickens, turkeys, ducks, Quail, Goose, Rabbits, Fishes, Trout, Salmon, Sea Bream, Sea Bass, sturgeon, Flatfish, Zebrafish, Horses, Cats, Dogs, mink |

The output from the searched databases, i.e. the bibliographic references including relevant information, e.g. title, authors, abstract, will be exported into separate Endnote X7 files, allowing a count of the individual hits per database. Files will then be combined and duplicate records will be removed.

The files obtained will be transferred into a web-based systematic review software, e.g. DistillerSR® (Evidence Partners, Ottawa, Canada), for the study selection procedure, see Section A.1.2.2.3.

### A.1.2.2.3. Study selection process

The whole selection process will be performed in the same web-based systematic review software, e.g. with DistillerSR® (Evidence Partners, Ottawa, Canada). Studies to be included in the assessment will be selected by a two-step selection procedure applying the eligibility criteria described in Section A.1.2.2.1.:

1. **Screening of title and abstract** to identify potentially relevant studies that will be included for full text screening applying the eligibility criteria. If the information contained in the title or abstract is not relevant to the research objectives, the article is not selected for full text assessment. Articles that will be excluded during screening of title and abstract will be stored in DistillerSR®.

This step will be conducted in duplicate by an external contractor (for the **structured approach A** and **B**) or by the Working Group/EFSA (for the **structured approach C, D, G** and **H**).

For those cases where the relevance of the study is uncertain, a conservative approach will be taken and the article will proceed through the second step. In case of doubts or divergences between the two reviewers, the full article will be screened.

2. **Screening of full article** to assess whether the article is relevant to the risk assessment for the references that have passed the first step.

This step will be conducted in duplicate by an external contractor or by the Working Group/EFSA, depending on the structured approach. When conducted by the external contractor, interaction between the external contractor and the Working Group/EFSA will be ensured, e.g. in case possible divergences arise, and in case these would highlight the need for amendments to the inclusion/exclusion criteria.

Previous to the outsourcing to the external contractor, the eligibility criteria were pilot tested by the Working Group members on a subset of records, and were refined if prone to misinterpretation.

The results of the different phases of the study selection process will be reported in a flowchart as recommended in the PRISMA statement on preferred reporting items for systematic reviews and meta-analyses (Moher et al., 2009).

#### A.1.2.2.4. Data extraction from included studies

For the structured approaches C, D and H related to the toxicokinetics (ADME) of the target compounds in humans, experimental animals and farm/companion animals (including transfer), respectively, the eligible studies will be considered and described in a narrative way by the relevant domain experts from the Working Group.

For the structured approach A, B and G the studies that will be considered eligible for inclusion will undergo data extraction and pre-defined information on e.g. the study design, intervention/exposure, methodology and results will be retrieved to allow an appraisal of their reliability and a descriptive synthesis of their results.

Outlines of the data extraction forms for structured approach A (epidemiological studies, Table 19), structured approach B (experimental animal studies, Table 20) and structured approach G (farm and companion animal studies, Table 21) will be used for collecting the data from the included studies.

This process will be carried out either by the external contractor (for structured approach A and B) or by the Working Group/EFSA (for structured approach G) based on the outlines of the data extraction forms developed by the Working Group members. Previously, the data extraction forms will be pilot tested in a subset of studies by the Working Group members. The data extraction forms will be set up into a web-based systematic review software, e.g. DistillerSR<sup>®</sup> (Evidence Partners, Ottawa, Canada), and data extraction will be performed. Instructions for extracting data will be made available to data extractors. Interaction between the external contractor and EFSA/the Working Group will be ensured in case of missing data, and a decision will be taken by the Working Group on how to proceed for inclusion of the study or whether to exclude it.

**Table 19.** Outline of the data extraction form for structured approach A (human studies, sub-questions 1 and 8)

|                                   |                                                                                                                                                                     |
|-----------------------------------|---------------------------------------------------------------------------------------------------------------------------------------------------------------------|
| <b>Study ID</b>                   | Reference <sup>(a)</sup> :                                                                                                                                          |
|                                   | Trial/study name and acronym (if applicable):                                                                                                                       |
|                                   | Total number of subjects:                                                                                                                                           |
| <b>Funding</b>                    | Funding source(s):                                                                                                                                                  |
| <b>Study design</b>               | Type: Cross-sectional studies, Cohort studies, Case control studies, Meta-analysis                                                                                  |
|                                   | Type of blinding:                                                                                                                                                   |
|                                   | Year the study was conducted (start):                                                                                                                               |
|                                   | Duration/length of follow-up:                                                                                                                                       |
|                                   | Dates of sampling (when relevant):                                                                                                                                  |
|                                   | Dates of analysis of the target compounds in the samples:                                                                                                           |
| <b>Subjects</b>                   | Number of participants in the present study:                                                                                                                        |
|                                   | Participation rates (%):                                                                                                                                            |
|                                   | Number of subject with measured levels:                                                                                                                             |
|                                   | Number of subjects per group:                                                                                                                                       |
|                                   | Follow-up rates by group (%):                                                                                                                                       |
|                                   | Sex (male/female):                                                                                                                                                  |
|                                   | Geography (country, region, state, etc.):                                                                                                                           |
|                                   | Race and ethnicity, socioeconomic background, other variables (e.g. age, BMI, parity) as reported:                                                                  |
|                                   | Age at exposure and outcome assessment (e.g. mean, median, measures of variance as presented in paper such as SD, SEM, 75th/90th/95th percentile, minimum/maximum): |
| Inclusion and exclusion criteria: |                                                                                                                                                                     |
| <b>Intervention/exposure</b>      | Compounds (e.g. PCDD/Fs and/or DL-PCBs):                                                                                                                            |
|                                   | <u>Exposure:</u>                                                                                                                                                    |
|                                   | - Measured levels in tissues (e.g. breast milk, blood, fat):<br>Lipid adjusted:                                                                                     |
|                                   | - Estimated dietary exposure:                                                                                                                                       |

|                                                                                                                 |                                                                                                                                                                               |
|-----------------------------------------------------------------------------------------------------------------|-------------------------------------------------------------------------------------------------------------------------------------------------------------------------------|
|                                                                                                                 | Method for assessing the dietary exposure:<br>Validation of the method:                                                                                                       |
|                                                                                                                 | Levels measured in human tissues:                                                                                                                                             |
|                                                                                                                 | Dietary intake (pg WHO-TEQ/kg bw per day):                                                                                                                                    |
|                                                                                                                 | TEF scheme (NATO, WHO <sub>1998</sub> , WHO <sub>2005</sub> , other, no TEF scheme applied):                                                                                  |
| <b>Methods:<br/>health outcome<br/>assessment</b>                                                               | End-point health category <sup>(b)</sup> :                                                                                                                                    |
|                                                                                                                 | Parameters measured:                                                                                                                                                          |
|                                                                                                                 | Diagnostic or method to measure health outcome (including self-reporting):                                                                                                    |
|                                                                                                                 | Were sub-groups analyses predefined (yes/no, if not, how was it justified?):                                                                                                  |
|                                                                                                                 | Confounders (other exposures), modifying factors, or other potential sources of bias considered in the analysis, and how they were considered:                                |
|                                                                                                                 |                                                                                                                                                                               |
| <b>Results: Main findings<br/>as reported by the<br/>authors and<br/>statistically significant<br/>findings</b> | Measures of effect and confidence interval at each exposure level as reported in the paper, and for each sub-group when applicable:                                           |
|                                                                                                                 | Statistical test used:                                                                                                                                                        |
|                                                                                                                 | How were the variables treated (continuous or transformed or categorical):                                                                                                    |
|                                                                                                                 | Shape of dose-response if reported by the authors (e.g. description of whether shape appears to be monotonic, non-monotonic, <i>p</i> value, according to the study authors): |
|                                                                                                                 |                                                                                                                                                                               |

ADME: absorption, distribution, metabolism and excretion; BMI: body mass index; DL-PCBs: dioxin-like polychlorinated biphenyls; PCB: dioxin-like polychlorinated biphenyl; PCDD/Fs: polychlorinated dibenzo-*p*-dioxins/dibenzofurans; SD: standard deviation; SEM: Standard error of the mean; TEF: toxicity equivalency factor; TEQ: toxic equivalents; WHO: World Health Organization.

(a): Relevant information on the particular study/trial not provided in the paper can be retrieved from the references provided therein.

(b): Reproductive effects (including organs), hepatotoxicity/gastrointestinal effects, immunotoxicity, cardiovascular effects, behavioural effects, neurotoxicity, carcinogenicity, metabolic effects (diabetes, thyroid function, obesity), effects on other hormone levels, teeth, musculoskeletal/bones, other (more than one option should be possible).

**Table 20.** Outline of the data extraction form for structured approach B (experimental animal studies, sub-question 3 and 9)

|                                        |                                                                                                      |
|----------------------------------------|------------------------------------------------------------------------------------------------------|
| <b>Study ID</b>                        | Reference <sup>(c)</sup> :                                                                           |
|                                        | Year the study was conducted (start, if available):                                                  |
| <b>Funding</b>                         | Funding source(s):                                                                                   |
| <b>Animal model</b>                    | Species/(sub-)strain/line:                                                                           |
|                                        | Disease models (e.g. infection, diabetes, allergy, obesity, autoimmune disease):                     |
| <b>Type of study and<br/>guideline</b> | Type of study <sup>(a)</sup> :                                                                       |
|                                        | Guideline compliance <sup>(b)</sup> :                                                                |
|                                        | GLP (yes/no):                                                                                        |
|                                        | Non-GLP, but consistent with guideline study (yes/no):                                               |
| <b>Exposure</b>                        | Compounds or mixture administered:                                                                   |
|                                        | Dose regimen (dose level or concentration of compounds or mixtures per group, and frequency):        |
|                                        | Duration of the exposure:                                                                            |
|                                        | Route of administration (diet, gavage, <i>i.p.</i> , <i>s.c.</i> ):                                  |
|                                        | Compound purity (if available, specify impurities identified):                                       |
|                                        | Vehicle used:                                                                                        |
| <b>Diet</b>                            | Diet name and source:<br>Control of background levels of contaminants in the diet (type and levels): |
| <b>Study design</b>                    | Sex and age of the initially exposed animals:                                                        |
|                                        | Number of groups/ number of animals per group:                                                       |
|                                        | Total doses applied during the study period (per kg bw) <sup>(e)</sup> :                             |
|                                        | TEF scheme (NATO, WHO <sub>1998</sub> , WHO <sub>2005</sub> , other, no TEF scheme applied):         |
|                                        | Randomization procedures at start of the study:                                                      |
|                                        | Reducing (culling) of litters and method:                                                            |
|                                        | Number of pups per litter for next generation and methodology:                                       |
|                                        | Number of pups per litter/animals for certain measurements and methodology:                          |
|                                        | Period (pre-mating, gestation, lactation):                                                           |
|                                        | End-point health category <sup>(d)</sup> :                                                           |
|                                        | Parameters measured:                                                                                 |
|                                        | Methods to measure outcome :                                                                         |
| <b>Statistical analysis</b>            | Statistical method used:                                                                             |

|                                                                                                                                                                                  |                                                                                                             |
|----------------------------------------------------------------------------------------------------------------------------------------------------------------------------------|-------------------------------------------------------------------------------------------------------------|
| <b>Results: Main findings as reported by the authors and statistically significant finding</b>                                                                                   | Concentration of the test compound in vehicle (analysed, stated, unclear):                                  |
|                                                                                                                                                                                  | Documentation of details for dose conversion when conducted:                                                |
|                                                                                                                                                                                  | Level of test compound(s) in tissue or blood:                                                               |
|                                                                                                                                                                                  | Main findings per dose or concentration (e.g., mean, median, frequency, measures of precision or variance): |
|                                                                                                                                                                                  | NOEL, LOEL, BMD/BMDL, and statistical significance of other dose levels (author's interpretation):          |
| Shape of dose response if reported by the authors (e.g., description of whether shape appears to be monotonic, non-monotonic, NA for single exposure or treatment group studies) |                                                                                                             |

BMD: benchmark dose; BMDL: benchmark dose lower confidence limit; bw: body weight; GLP: Good Laboratory Practice; *i.p.*: intraperitoneal; LOEL: lowest-observed-effect level; NA: not applicable; NOEL: no-observed-effect level; *s.c.*: subcutaneous; TEF: toxicity equivalency factor.

- (a): e.g. acute, sub-acute (i.e. 4 weeks), subchronic (i.e. 13 weeks), chronic (i.e. 104 weeks), multigenerational, developmental, carcinogenicity.
- (b): i.e. use of Environmental Protection Agency (EPA), Organisation for Economic Co-Operation (OECD), Food and Drug Administration (FDA) or other guideline for study design.
- (c): Relevant information on the particular study/trial not provided in the paper can be retrieved from the references provided therein.
- (d): Reproductive effects (including organs), hepatotoxicity/gastrointestinal effects, immunotoxicity, cardiovascular effects, behavioural effects, neurotoxicity, carcinogenicity, metabolic effects (diabetes, thyroid function, obesity), effects on other hormone levels, teeth, musculoskeletal/bones, others (more than one option should be possible).
- (e): Total dose applied during the study period, estimated using default values (EFSA Scientific Committee, 2012a) if feed consumption not provided.

**Table 21.** Outline of the data extraction form for structured approach G (farm and companion animal studies, sub-questions 16 and 17)

|                                                                                                 |                                                                                                             |
|-------------------------------------------------------------------------------------------------|-------------------------------------------------------------------------------------------------------------|
| <b>Study ID</b>                                                                                 | Reference:                                                                                                  |
|                                                                                                 | Year the study was conducted (start, if available):                                                         |
| <b>Funding</b>                                                                                  | Funding source(s):                                                                                          |
| <b>Animal model</b>                                                                             | Species:                                                                                                    |
|                                                                                                 | Strain/breed:                                                                                               |
|                                                                                                 | Disease models (e.g. infection, diabetes, allergy, obesity, autoimmune disease):                            |
| <b>Type of study and guidelines</b>                                                             | Type of study <sup>(a)</sup>                                                                                |
|                                                                                                 | Guideline compliance <sup>(b)</sup> :                                                                       |
|                                                                                                 | GLP (yes/no):                                                                                               |
|                                                                                                 | Non-GLP but consistent with guideline study (yes/no):                                                       |
| <b>Exposure</b>                                                                                 | Compounds or mixture administered/exposed to:                                                               |
|                                                                                                 | Source in case of contamination incident:                                                                   |
|                                                                                                 | Dose regime (dose level or concentration of compounds or mixtures per group, and frequency):                |
|                                                                                                 | Duration of exposure:                                                                                       |
|                                                                                                 | Route of administration (diet, gavage, <i>i.p.</i> , <i>s.c.</i> , <i>in ovo</i> ):                         |
|                                                                                                 | Compound purity (if available, specify impurities identified):                                              |
|                                                                                                 | Vehicle used:                                                                                               |
|                                                                                                 |                                                                                                             |
| <b>Diet</b>                                                                                     | Diet name and source:                                                                                       |
|                                                                                                 | Control of background levels of contaminants in the diet (type and levels):                                 |
| <b>Study design</b>                                                                             | Sex and age of the initially exposed animals:                                                               |
|                                                                                                 | Number of groups / number of animals per group:                                                             |
|                                                                                                 | TEF scheme (NATO, WHO <sub>1998</sub> or WHO <sub>2005</sub> ):                                             |
|                                                                                                 | Randomization procedures at start of study:                                                                 |
|                                                                                                 | Period (pre-mating, mating, gestation, lactation):                                                          |
|                                                                                                 | Frequency of exposure (e.g. daily, 5 days per week, 7 days per week):                                       |
|                                                                                                 | End-point health category <sup>(c)</sup> :                                                                  |
|                                                                                                 | Parameters measured:                                                                                        |
|                                                                                                 | Method to measure outcome:                                                                                  |
|                                                                                                 | Quality assurance system:                                                                                   |
| <b>Statistical analysis</b>                                                                     | Statistical methods used:                                                                                   |
| <b>Results: Main findings as reported by the authors and statistically significant findings</b> | Concentration of the test compound in vehicle:                                                              |
|                                                                                                 | Documentation of details for dose conversion when conducted:                                                |
|                                                                                                 | Levels of test compound(s) in tissue or blood:                                                              |
|                                                                                                 | Main findings per dose or concentration (e.g., mean, median, frequency, measures of precision or variance): |

|  |                                                                                                                                                                                    |
|--|------------------------------------------------------------------------------------------------------------------------------------------------------------------------------------|
|  | Feed intake:                                                                                                                                                                       |
|  | NOEL, LOEL, BMD/BMDL, and statistical significance of other dose levels (author's interpretation):                                                                                 |
|  | Shape of dose response, if reported by the authors (e.g., description of whether shape appears to be monotonic, non-monotonic, NA for single exposure or treatment group studies): |

BMD: benchmark dose; BMDL: benchmark dose lower confidence limit; bw: body weight; GLP: Good Laboratory Practice; *i.p.*: intraperitoneal; LOEL: lowest-observed-effect level; NA: not applicable; NOEL: no-observed-effect level; *s.c.*: subcutaneous; TEF: toxicity equivalency factor.

- (a): Acute, sub-acute (i.e. up to 4 weeks), subchronic (i.e. up to 13 weeks), chronic (i.e. up to 104 weeks), multigenerational, developmental, *in ovo*.  
 (b): i.e. use of EPA, OECD, NTP, EFSA or other guideline for study design.  
 (c): Reproductive effects (including organs), hepatotoxicity/gastrointestinal effects, immunotoxicity, cardiovascular effects, behavioural effects, carcinogenicity, metabolic effects (diabetes, thyroid function, obesity), effects on other hormone levels, others.

#### A.1.2.2.5. Assessment of reliability of included studies

The studies retrieved to inform the human risk assessment (structured approach A, human studies, and structured approach B, experimental animal studies), and the farm and companion animal risk assessment (structured approach G) will be appraised for reliability.

The studies retrieved and data extracted by each structured approach will be sorted as follows:

- The human studies (structured approach A, addressing sub-questions 1 and 8) will be sorted by: (i) endpoint, (ii) target compound(s) analysed and (iii) study design.
- The experimental animal studies (structured approach B, addressing sub-questions 3 and 9) will be sorted by: (i) animal species, (ii) endpoint, (iii) target compound(s) applied and (iii) study duration (e.g. acute, subchronic, chronic, multigenerational, developmental, carcinogenicity).

Once sorted, the studies performed in animal models (e.g. diabetic models, animals on high/low fat diets, lean/obese animals, TCDD-sensitive and -resistant animals) will be identified and it will be decided whether they are informative to address the corresponding sub-questions. If they are, they will be appraised as described below, otherwise they will be excluded from the process.

- The farm and companion animal studies (structured approach G, addressing sub-questions 16 and 17) will be sorted as the experimental animal studies above.

The reliability of the individual studies will be appraised by considering the internal validity or risk of bias, defined as 'the extent to which the design and conduct of a study are likely to have prevented bias', i.e. non-random error (Higgins and Green, 2011).

The elements that will be considered for appraising the reliability of each individual study are illustrated in the critical appraisal tools (CATs) reported below for human, experimental animal and farm/companion animal studies, respectively. These tools have been developed by tailoring the current OHAT Risk of Bias Tool as included in the NTP-OHAT Approach for Systematic Review (Rooney et al., 2014). Specific forms will be implemented in the web-based systematic review software (e.g. DistillerSR<sup>®</sup>) by the external contractor to allow the study appraisal by the Working Group.

The appraisal of the studies will be done independently by two reviewers (experts from the Working Group) and possible discrepancies will be discussed by the whole Working Group.

For each element considered in the appraisal, expert judgement will be translated into the rating scale shown in Table 22.

**Table 22.** Proposed rating scale for appraising the studies

| Rating | Internal validity                       | Explanation                                                                                                                                                                                                                                                 |
|--------|-----------------------------------------|-------------------------------------------------------------------------------------------------------------------------------------------------------------------------------------------------------------------------------------------------------------|
| + +    | Definitively low risk of bias           | There is direct evidence of low risk-of-bias practices                                                                                                                                                                                                      |
| +      | Probably low risk of bias               | There is indirect evidence of low risk-of-bias practices OR it is deemed that deviations from low risk-of-bias practices for these criteria during the study would not appreciably bias results, including consideration of direction and magnitude of bias |
| -/NR   | Probably high risk of bias/Not reported | There is indirect evidence of high risk-of-bias practices OR there is insufficient information (e.g., not reported or 'NR') provided about relevant risk-of-bias practices                                                                                  |
| - -    | Definitively high risk of bias          | There is direct evidence of high risk-of-bias practices                                                                                                                                                                                                     |
| NA     | Not applicable                          | /                                                                                                                                                                                                                                                           |

#### A.1.2.2.6. Study allocation to different tiers of reliability

Once the individual studies have been appraised for internal validity, they will be assigned to tiers of reliability, with an explanation for their allocation. This will then be considered for the analysis (see Section A.1.2.3. above).

For the purpose of creating a classification of the reliability of the evidence, the Working Group identified 3 key questions among the elements that need to be considered for the appraisal of internal validity of the studies (see Tables 23, 24, 25 and 26).

#### Human studies

The 3 key questions for the appraisal of human studies are the following:

- **Key question A:** Did the study design or analysis account for important confounding and modifying variables?
- **Key question B:** Can we be confident in the exposure characterisation?
- **Key question C:** Can we be confident in the outcome assessment?

Each study will be assigned to Tier-1 or Tier-2 or Tier-3 of reliability using the method described below:

- A human study is classified in Tier-1 if: it is rated as 'definitely low' or 'probably low' for the three key questions A-B-C **AND** it has at least half of the other three applicable questions answered 'definitely low' or 'probably low' risk of bias (see Table 23);
- A study is classified in Tier-3 if: it is rated as 'definitely high' or 'probably high' for the three key questions A-B-C **AND** it has at least half of the other three applicable questions answered 'definitely high' or 'probably high' risk of bias (see Table 23),
- A study is classified in the Tier-2 if it falls neither in Tier-1 nor Tier-3.

#### Experimental animal studies

The 3 key questions for the appraisal of experimental animal studies are the following:

- **Key question A:** Was allocation to study groups adequately randomised (including selection of groups during the study)?
- **Key question B:** Can we be confident in the exposure characterisation?
- **Key question C:** Can we be confident in the outcome Assessment? Are we confident that valid, reliable and sensitive methods to assess the outcome have been consistently applied across groups?

Each study will be assigned to Tier-1 or Tier-2 or Tier-3 of reliability using the method described below:



- A study is classified in the Tier-1 if: it is rated as 'definitely low' or 'probably low' for the three key questions A-B-C **AND** it has at least half of the other six applicable questions answered 'definitely low' or 'probably low' risk of bias (see Table 24);
- A study is classified in the Tier-3 if: it is rated as 'definitely high' or 'probably high' for the three key questions A-B-C **AND** it has at least half of the other six applicable questions answered 'definitely high' or 'probably high' risk of bias (see Table 24),
- A study is classified in Tier-2 if it falls neither in Tier-1 nor Tier-3.

### Farm and companion animal studies

The key questions for the appraisal of farm and companion animal studies are the following based on the study type:

For studies following an experimental design with controlled exposure:

- **Key question A:** Was allocation to study groups adequately randomised (including selection of groups during the study)?
- **Key question B:** Can we be confident in the exposure characterisation?
- **Key question C:** Can we be confident in the outcome Assessment? Are we confident that valid, reliable and sensitive methods to assess the outcome have been consistently applied across groups?

For field exposure studies:

- **Key question D:** Did the study design or analysis account for important confounding and modifying variables?
- **Key question E:** Can we be confident in the exposure characterisation?
- **Key question F:** Can we be confident in the outcome assessment?

Each study will be assigned to Tier-1 or Tier-2 or Tier-3 of reliability using the method described below:

- A farm or companion animal study is classified in the Tier-1 if: it is rated as 'definitely low' or 'probably low' for the three key questions A-B-C or D-E-F depending on the study design (see **Tables 25** and **26**, respectively);
- A study is classified in the Tier-3 if: it is rated as 'definitely high' or 'probably high' for the three key questions A-B-C or D-E-F depending on the study design (see **Tables 25** and **26**, respectively);
- A study is classified in Tier-2 if it falls neither in Tier-1 nor Tier-3.

#### A.1.2.2.7. Summary of the results from individual studies

The results of the studies for the human hazard identification sub-questions (structured approach A and B) and the farm and companion animal hazard identification sub-question (structured approach G) will be presented in a tabulated format considering the following characteristics as a minimum set. The Working Group may identify additional aspects at a later stage:

- Lines of evidence (i.e. human studies, experimental animal studies, or farm/companion animal studies),
- Type of study (e.g. cohort, cross-sectional, case-control or acute, subchronic, chronic, multigenerational, developmental, carcinogenicity, other, or field exposure)
- Species
- Compound(s) analysed
- Doses (or dietary exposure)



- Direct exposure or indirect via the dams
- Levels in tissues
- End-point(s), e.g. developmental effects, reproductive organs/effects, hepatotoxicity/gastrointestinal effects, immunotoxicity, cardiovascular effects, behavioural effects, carcinogenicity, metabolic effects (diabetes, thyroid function, obesity), effects on other hormone levels<sup>3</sup>.
- Internal validity or risk of bias (see Sections A.1.2.2.5 and A.1.2.2.6)

---

<sup>3</sup> Hormones of the oestrogen, androgen, thyroid, or steroidogenesis (EATS) modalities.

**Table 23.** Appraisal tool for human observational studies (adapted from NTP Risk of Bias tool)

| Q | Target organ:<br>Endpoint:<br>Intervention/Exposure:                                                       | Rating | Explanation for expert judgement                                                                                                                                                                                                                                                                                                                                                                                                                                                                                                                                                                                                                                                                                                                                                                                                                                                                                                                                                       |
|---|------------------------------------------------------------------------------------------------------------|--------|----------------------------------------------------------------------------------------------------------------------------------------------------------------------------------------------------------------------------------------------------------------------------------------------------------------------------------------------------------------------------------------------------------------------------------------------------------------------------------------------------------------------------------------------------------------------------------------------------------------------------------------------------------------------------------------------------------------------------------------------------------------------------------------------------------------------------------------------------------------------------------------------------------------------------------------------------------------------------------------|
| 1 | <b>Selection bias:</b><br><br>Did selection of study participants result in appropriate comparison groups? | ++     | <p>There is direct evidence that subjects (both exposed and non-exposed) were similar (e.g. recruited from the same eligible population, recruited with the same method of ascertainment using the same inclusion and exclusion criteria, and were of similar age and health status), recruited within the same time frame, and had the similar participation/response rates.</p> <p><i>For case-control studies:</i> There is direct evidence that cases and controls were similar (e.g. recruited from the same eligible population including being of similar age, gender, ethnicity, and eligibility criteria other than outcome of interest as appropriate), recruited within the same time frame, and controls are described as having no history of the outcome.</p> <p><i>Note: A study will be considered low risk of bias if baseline characteristics of groups differed but these differences were considered as potential confounding or stratification variables.</i></p> |
|   |                                                                                                            | +      | <p>There is indirect evidence that subjects (both exposed and non-exposed) were similar (e.g., recruited from the same eligible population, recruited with the same method of ascertainment using the same inclusion and exclusion criteria, and were of similar age and health status), recruited within the same time frame, and had the similar participation/response rates <b>OR</b> differences between groups would not appreciably bias results.</p> <p><i>For case-control studies:</i> There is indirect evidence that cases and controls were similar (e.g., recruited from the same eligible population, recruited with the same method of ascertainment using the same inclusion and exclusion criteria, and were of similar age), recruited within the same time frame, and controls are described as having no history of the outcome <b>OR</b> differences between cases and controls would not appreciably bias results.</p>                                          |
|   |                                                                                                            | -      | <p>There is indirect evidence that subjects (both exposed and non-exposed) were not similar, recruited within very different time frames, or had the very different participation/response rates <b>OR</b> there is insufficient information provided about the comparison group including a different rate of non-response without an explanation.</p> <p><i>For case-control studies:</i> There is direct evidence that controls were drawn from a very dissimilar population than cases or recruited within very different time frames <b>OR</b> there is insufficient information provided about the appropriateness of controls including rate of response reported for cases only.</p>                                                                                                                                                                                                                                                                                           |
|   |                                                                                                            | --     | <p>There is direct evidence that subjects (both exposed and non-exposed) were not similar, recruited within very different time frames, or had very different participation/response rates.</p> <p><i>For case-control studies:</i> There is direct evidence that controls were drawn from a very dissimilar population than cases or recruited within very different time frames.</p>                                                                                                                                                                                                                                                                                                                                                                                                                                                                                                                                                                                                 |
|   |                                                                                                            | NA     | Not applicable                                                                                                                                                                                                                                                                                                                                                                                                                                                                                                                                                                                                                                                                                                                                                                                                                                                                                                                                                                         |

| Q | Target organ:<br>Endpoint:<br>Intervention/Exposure:                                                                                                                                                                                                | Rating                                                                                                            | Explanation for expert judgement                                                                                                                                                                                                                                                                                                                                                                                                                                                                                                                                                                                                                                                                                                                                                                                                                                                                                                                                                                                                                                                                                                                                                                                                                                                                                                                                                                                                                                                                                                                                                                                                                                                                                                                                                                                                                                                                                                                                                                                                                                                                                                                                                                                                                                                                                                                                                                                                                                                                                                                                                                                                                                                                                                                                                                                                                                                                                                                                                                                                                                                                                                                                                                                                                                                                                                                                                                                                                                                                                                                                                                                                                                                                                                                                                                                                                                                                                                                                                                                                                                                                                                                                                                                                                                                                                                                                                                                                                                                  |
|---|-----------------------------------------------------------------------------------------------------------------------------------------------------------------------------------------------------------------------------------------------------|-------------------------------------------------------------------------------------------------------------------|-----------------------------------------------------------------------------------------------------------------------------------------------------------------------------------------------------------------------------------------------------------------------------------------------------------------------------------------------------------------------------------------------------------------------------------------------------------------------------------------------------------------------------------------------------------------------------------------------------------------------------------------------------------------------------------------------------------------------------------------------------------------------------------------------------------------------------------------------------------------------------------------------------------------------------------------------------------------------------------------------------------------------------------------------------------------------------------------------------------------------------------------------------------------------------------------------------------------------------------------------------------------------------------------------------------------------------------------------------------------------------------------------------------------------------------------------------------------------------------------------------------------------------------------------------------------------------------------------------------------------------------------------------------------------------------------------------------------------------------------------------------------------------------------------------------------------------------------------------------------------------------------------------------------------------------------------------------------------------------------------------------------------------------------------------------------------------------------------------------------------------------------------------------------------------------------------------------------------------------------------------------------------------------------------------------------------------------------------------------------------------------------------------------------------------------------------------------------------------------------------------------------------------------------------------------------------------------------------------------------------------------------------------------------------------------------------------------------------------------------------------------------------------------------------------------------------------------------------------------------------------------------------------------------------------------------------------------------------------------------------------------------------------------------------------------------------------------------------------------------------------------------------------------------------------------------------------------------------------------------------------------------------------------------------------------------------------------------------------------------------------------------------------------------------------------------------------------------------------------------------------------------------------------------------------------------------------------------------------------------------------------------------------------------------------------------------------------------------------------------------------------------------------------------------------------------------------------------------------------------------------------------------------------------------------------------------------------------------------------------------------------------------------------------------------------------------------------------------------------------------------------------------------------------------------------------------------------------------------------------------------------------------------------------------------------------------------------------------------------------------------------------------------------------------------------------------------------------------------------|
| 2 | <p data-bbox="237 280 580 464"><b>Confounding bias:</b></p> <p data-bbox="237 344 580 464">Did the study design or analysis account for important confounding and modifying variables?</p> <p data-bbox="237 488 454 520"><b>KEY QUESTION A</b></p> | <p data-bbox="602 280 647 312">++</p> <p data-bbox="602 751 629 783">+</p> <p data-bbox="602 1023 620 1054">-</p> | <p data-bbox="714 280 2065 552">There is direct evidence that appropriate adjustments or explicit considerations were made for primary covariates and confounders in the final analyses through the use of statistical models to reduce research-specific bias including standardization, matching, adjustment in multivariate model, stratification, propensity scoring, or other methods that were appropriately justified. Acceptable consideration of appropriate adjustment factors includes cases when the factor is not included in the final adjustment model because the author conducted analyses that indicated it did not need to be included, <b>AND</b> there is direct evidence that primary covariates and confounders were assessed using valid and reliable measurements, <b>AND</b> there is direct evidence that other exposures anticipated to bias results were not present or were appropriately measured and adjusted for. In occupational studies or studies of contaminated sites, other chemical exposures known to be associated with those settings were appropriately considered.</p> <p data-bbox="714 576 2065 751"><i>For case-control studies:</i> There is direct evidence that appropriate adjustments were made for primary covariates and confounders in the final analyses through the use of statistical models to reduce research specific bias including standardization, matching of cases and controls, adjustment in multivariate model, stratification, propensity scoring, or other methods were appropriately justified, <b>AND</b> there is direct evidence that primary covariates and confounders were assessed using valid and reliable measurements, <b>AND</b> there is direct evidence that other exposures anticipated to bias results were not present or were appropriately measured and adjusted for.</p> <p data-bbox="714 759 2065 959">There is indirect evidence that appropriate adjustments were made, <b>OR</b> it is deemed that not considering or only considering a partial list of covariates or confounders in the final analyses would not appreciably bias results. <b>AND</b> there is evidence (direct or indirect) that primary covariates and confounders were assessed using valid and reliable measurements, <b>OR</b> it is deemed that the measures used would not appreciably bias results (i.e., the authors justified the validity of the measures from previously published research), <b>AND</b> there is evidence (direct or indirect) that other co-exposures anticipated to bias results were not present or were appropriately adjusted for, <b>OR</b> it is deemed that co-exposures present would not appreciably bias results.</p> <p data-bbox="714 983 1984 1015"><i>Note: As discussed above, this includes insufficient information provided on co-exposures in general population studies.</i></p> <p data-bbox="714 1023 2065 1286">There is indirect evidence that the distribution of primary covariates and known confounders differed between the groups and was not appropriately adjusted for in the final analyses, <b>OR</b> there is insufficient information provided about the distribution of known confounders (record 'NR' as basis for answer), <b>OR</b> there is indirect evidence that primary covariates and confounders were assessed using measurements of unknown validity, <b>OR</b> there is insufficient information provided about the measurement techniques used to assess primary covariates and confounders (record 'NR' as basis for answer), <b>OR</b> there is indirect evidence that there was an unbalanced provision of additional co-exposures across the primary study groups, which were not appropriately adjusted for, <b>OR</b> there is insufficient information provided about co-exposures in occupational studies or studies of contaminated sites where high exposures to other chemical exposures would have been reasonably anticipated (record 'NR' as basis for answer).</p> <p data-bbox="714 1310 2065 1402"><i>For case-control studies:</i> There is indirect evidence that the distribution of primary covariates and known confounders differed between cases and controls and was not investigated further, <b>OR</b> there is insufficient information provided about the distribution of known confounders in cases and controls (record 'NR' as basis for answer), <b>OR</b> there is indirect evidence that</p> |

| Q | Target organ:<br>Endpoint:<br>Intervention/Exposure:                                                                               | Rating | Explanation for expert judgement                                                                                                                                                                                                                                                                                                                                                                                                                                                                                                                                                                                                                                                                                                                                                                                                                                                                                                                                                                                                                                             |
|---|------------------------------------------------------------------------------------------------------------------------------------|--------|------------------------------------------------------------------------------------------------------------------------------------------------------------------------------------------------------------------------------------------------------------------------------------------------------------------------------------------------------------------------------------------------------------------------------------------------------------------------------------------------------------------------------------------------------------------------------------------------------------------------------------------------------------------------------------------------------------------------------------------------------------------------------------------------------------------------------------------------------------------------------------------------------------------------------------------------------------------------------------------------------------------------------------------------------------------------------|
|   |                                                                                                                                    |        | <p>primary covariates and confounders were assessed using measurements of unknown validity, OR there is insufficient information provided about the measurement techniques used (record 'NR' as basis for answer), OR there is indirect evidence that there was an unbalanced provision of additional co-exposures across cases and controls, which were not appropriately adjusted for, OR there is insufficient information provided about co-exposures in occupational studies or studies of contaminated sites where high exposures to other chemical exposures would have been reasonably anticipated (record 'NR' as basis for answer).</p>                                                                                                                                                                                                                                                                                                                                                                                                                            |
|   |                                                                                                                                    | --     | <p>There is direct evidence that the distribution of primary covariates and known confounders differed between the groups, confounding was demonstrated, and was not appropriately adjusted for in the final analyses, OR there is direct evidence that primary covariates and confounders were assessed using non valid measurements, OR there is direct evidence that there was an unbalanced provision of additional co-exposures across the primary study groups, which were not appropriately adjusted for.</p> <p><i>For case-control studies:</i> There is direct evidence that the distribution of primary covariates and known confounders differed between cases and controls, confounding was demonstrated, but was not appropriately adjusted for in the final analyses, OR there is direct evidence that primary covariates and confounders were assessed using non valid measurements, OR there is direct evidence that there was an unbalanced provision of additional co-exposures across cases and controls, which were not appropriately adjusted for.</p> |
|   |                                                                                                                                    | NA     | Not applicable                                                                                                                                                                                                                                                                                                                                                                                                                                                                                                                                                                                                                                                                                                                                                                                                                                                                                                                                                                                                                                                               |
| 3 | <p><b>Attrition/exclusion bias:</b></p> <p>Were outcome data completely reported without attrition or exclusion from analysis?</p> | ++     | <p>There is direct evidence that loss of subjects (i.e., incomplete outcome data) was adequately addressed and reasons were documented when human subjects were removed from a study. Acceptable handling of subject attrition includes: very little missing outcome data; reasons for missing subjects unlikely to be related to outcome (for survival data, censoring unlikely to be introducing bias); missing outcome data balanced in numbers across study groups, with similar reasons for missing data across groups, OR missing data have been imputed using appropriate methods and characteristics of subjects lost to follow up or with unavailable records are described in identical way and are not significantly different from those of the study participants.</p> <p><i>For case-control and cross sectional studies:</i> There is direct evidence that exclusion of subjects from analyses was adequately addressed, and reasons were documented when subjects were removed from the study or excluded from analyses.</p>                                 |
|   |                                                                                                                                    | +      | <p>There is indirect evidence that loss of subjects (i.e. incomplete outcome data) was adequately addressed and reasons were documented when human subjects were removed from a study <b>OR</b> it is deemed that the proportion lost to follow-up would not appreciably bias results. This would include reports of no statistical differences in characteristics of subjects lost to follow up or with unavailable records from those of the study participants. Generally, the higher the ratio of participants with missing data to participants with events, the greater potential there is for bias. For studies with a long duration of follow-up, some withdrawals for such reasons are inevitable.</p> <p><i>For case-control and cross sectional studies:</i> There is indirect evidence that exclusion of subjects from analyses was adequately addressed, and reasons were documented when subjects were removed from the study or excluded from</p>                                                                                                             |

| Q | Target organ:<br>Endpoint:<br>Intervention/Exposure:                                                                    | Rating | Explanation for expert judgement                                                                                                                                                                                                                                                                                                                                                                                                                                                                                                                                                                                                                                                                                                                                                                                                                                                                                                                                                                                                                                                                                                                                                                                                                                                                                                                                                                                                                                                                                                                                                                                                                                                                                                                                                                                           |
|---|-------------------------------------------------------------------------------------------------------------------------|--------|----------------------------------------------------------------------------------------------------------------------------------------------------------------------------------------------------------------------------------------------------------------------------------------------------------------------------------------------------------------------------------------------------------------------------------------------------------------------------------------------------------------------------------------------------------------------------------------------------------------------------------------------------------------------------------------------------------------------------------------------------------------------------------------------------------------------------------------------------------------------------------------------------------------------------------------------------------------------------------------------------------------------------------------------------------------------------------------------------------------------------------------------------------------------------------------------------------------------------------------------------------------------------------------------------------------------------------------------------------------------------------------------------------------------------------------------------------------------------------------------------------------------------------------------------------------------------------------------------------------------------------------------------------------------------------------------------------------------------------------------------------------------------------------------------------------------------|
|   |                                                                                                                         |        | <p>analyses.</p> <p>- There is indirect evidence that loss of subjects (i.e. incomplete outcome data) was unacceptably large and not adequately addressed <b>OR</b> there is insufficient information provided about numbers of subjects lost to follow-up.</p> <p><i>For case-control and cross sectional studies:</i> There is indirect evidence that exclusion of subjects from analyses was not adequately addressed, <b>OR</b> there is insufficient information provided about why subjects were removed from the study or excluded from analyses.</p> <p>-- There is direct evidence that loss of subjects (i.e. incomplete outcome data) was unacceptably large and not adequately addressed. Unacceptable handling of subject attrition includes: reason for missing outcome data likely to be related to true outcome, with either imbalance in numbers or reasons for missing data across study groups; or potentially inappropriate application of imputation.</p> <p><i>For case-control and cross sectional studies:</i> There is direct evidence that exclusion of subjects from analyses was not adequately addressed. Unacceptable handling of subject exclusion from analyses includes: reason for exclusion likely to be related to true outcome, with either imbalance in numbers or reasons for exclusion across study groups.</p> <p>NA Not applicable</p>                                                                                                                                                                                                                                                                                                                                                                                                                                           |
| 4 | <p><b>Detection bias:</b></p> <p>Can we be confident in the exposure characterisation?</p> <p><b>KEY QUESTION B</b></p> |        | <p>++ There is direct evidence that exposure was consistently assessed (i.e. under the same method and time-frame) using well-established methods that directly measure exposure (e.g., measurement of the chemical in air or measurement of the chemical in blood, plasma, urine, etc.), <b>OR</b> exposure was assessed using less-established methods that directly measure exposure and are validated against well-established methods.</p> <p>+ There is indirect evidence that the exposure was consistently assessed using well-established methods that directly measure exposure, <b>OR</b> exposure was assessed using indirect measures (e.g., questionnaire or occupational exposure assessment by a certified industrial hygienist) that have been validated or empirically shown to be consistent with methods that directly measure exposure (i.e., inter-methods validation: one method vs. another) .</p> <p>- There is indirect evidence that the exposure was assessed using poorly validated methods that directly measure exposure, <b>OR</b> there is direct evidence that the exposure was assessed using indirect measures that have not been validated or empirically shown to be consistent with methods that directly measure exposure (e.g., a job-exposure matrix or self-report without validation) (record 'NR' as basis for answer), <b>OR</b> there is insufficient information provided about the exposure assessment, including validity and reliability, but no evidence for concern about the method used (record 'NR' as basis for answer).</p> <p>-- There is direct evidence that the exposure was assessed using methods with poor validity, <b>OR</b> evidence of exposure misclassification (e.g., differential recall of self-reported exposure).</p> <p>NA Not applicable</p> |

| Q | Target organ:<br>Endpoint:<br>Intervention/Exposure:                                                                                                                                                 | Rating                                                                      | Explanation for expert judgement                                                                                                                                                                                                                                                                                                                                                                                                                                                                                                                                                                                                                                                                                                                                                                                                                                                                                                                                                                                                                                                                                                                                                                                                                                                                                                                                                                                                                                                                                                                                                                                                                                                                                                                                                                                                                                                                                                                                                                                                                                                                                                                                                                                                                                                                                                                                                                                                                                                                                                                                                                                                                                                                                                                                                                                                                                                                                                                                                                                                                                                                                                                                                                                                                                                                                                                                                                                                                                                                                                                                                                                                                                                                                                                                                                                                                                                                                                                                                                                                                                                         |
|---|------------------------------------------------------------------------------------------------------------------------------------------------------------------------------------------------------|-----------------------------------------------------------------------------|------------------------------------------------------------------------------------------------------------------------------------------------------------------------------------------------------------------------------------------------------------------------------------------------------------------------------------------------------------------------------------------------------------------------------------------------------------------------------------------------------------------------------------------------------------------------------------------------------------------------------------------------------------------------------------------------------------------------------------------------------------------------------------------------------------------------------------------------------------------------------------------------------------------------------------------------------------------------------------------------------------------------------------------------------------------------------------------------------------------------------------------------------------------------------------------------------------------------------------------------------------------------------------------------------------------------------------------------------------------------------------------------------------------------------------------------------------------------------------------------------------------------------------------------------------------------------------------------------------------------------------------------------------------------------------------------------------------------------------------------------------------------------------------------------------------------------------------------------------------------------------------------------------------------------------------------------------------------------------------------------------------------------------------------------------------------------------------------------------------------------------------------------------------------------------------------------------------------------------------------------------------------------------------------------------------------------------------------------------------------------------------------------------------------------------------------------------------------------------------------------------------------------------------------------------------------------------------------------------------------------------------------------------------------------------------------------------------------------------------------------------------------------------------------------------------------------------------------------------------------------------------------------------------------------------------------------------------------------------------------------------------------------------------------------------------------------------------------------------------------------------------------------------------------------------------------------------------------------------------------------------------------------------------------------------------------------------------------------------------------------------------------------------------------------------------------------------------------------------------------------------------------------------------------------------------------------------------------------------------------------------------------------------------------------------------------------------------------------------------------------------------------------------------------------------------------------------------------------------------------------------------------------------------------------------------------------------------------------------------------------------------------------------------------------------------------------------------|
| 5 | <p data-bbox="241 284 584 400"><b>Detection bias:</b></p> <p data-bbox="241 347 584 400">Can we be confident in the outcome assessment?</p> <p data-bbox="241 432 584 459"><b>KEY QUESTION C</b></p> | <p data-bbox="600 284 696 699">++</p> <p data-bbox="600 703 696 1366">+</p> | <p data-bbox="712 284 2051 400"><i>For cohort studies:</i> There is direct evidence that the outcome was assessed using well-established methods (e.g. the 'gold standard'), AND subjects had been followed for the same length of time in all study groups. Acceptable assessment methods will depend on the outcome, but examples of such methods may include: objectively measured with diagnostic methods, measured by trained interviewers, obtained from registries.</p> <p data-bbox="712 432 2051 549"><i>For case-control studies:</i> There is direct evidence that the outcome was assessed in cases (i.e., case definition) and controls using well-established methods (the gold standard), AND subjects had been followed for the same length of time in all study groups, AND there is direct evidence that the outcome assessors (including study subjects, if outcomes were self-reported) were adequately blinded to the exposure level when outcome was assessed in cases (i.e., case definition) and controls.</p> <p data-bbox="712 580 2051 697"><i>For cross-sectional studies:</i> There is direct evidence that the outcome was assessed using well-established methods (the gold standard), AND there is direct evidence that the outcome assessors (including study subjects, if outcomes were self-reported) were adequately blinded to the exposure level, and it is unlikely that they could have broken the blinding prior to reporting outcomes.</p> <p data-bbox="712 703 2051 963"><i>For cohort studies:</i> There is indirect evidence that the outcome was assessed using acceptable methods (i.e. deemed valid and reliable but not the gold standard) AND subjects had been followed for the same length of time in all study groups [Acceptable, but not ideal assessment methods will depend on the outcome, but examples of such methods may include proxy reporting of outcomes and mining of data collected for other purposes], OR it is deemed that the outcome assessment methods used would not appreciably bias results, AND there is indirect evidence that the outcome assessors (including study subjects, if outcomes were self-reported) were adequately blinded to the study group, and it is unlikely that they could have broken the blinding prior to reporting outcomes, OR it is deemed that lack of adequate blinding of outcome assessors would not appreciably bias results, which is more likely to apply to objective outcome measures.</p> <p data-bbox="712 995 2051 1171"><i>For case-control studies:</i> There is indirect evidence that the outcome was assessed in cases (i.e., case definition) and controls using acceptable methods, AND subjects had been followed for the same length of time in all study groups, OR it is deemed that the outcome assessment methods used would not appreciably bias results, AND there is direct evidence that the outcome assessors were adequately blinded to the exposure level when reporting outcomes, OR it is deemed that lack of adequate blinding of outcome assessors would not appreciably bias results (including that subjects self-reporting outcomes were likely not aware of reported links between the exposure and outcome or lack of blinding is unlikely to bias a particular outcome).</p> <p data-bbox="712 1203 2051 1366"><i>For cross-sectional studies:</i> There is indirect evidence that the outcome was assessed using acceptable methods, OR it is deemed that the outcome assessment methods used would not appreciably bias results, AND there is indirect evidence that the outcome assessors were adequately blinded to the exposure level, and it is unlikely that they could have broken the blinding prior to reporting outcomes, OR it is deemed that lack of adequate blinding of outcome assessors would not appreciably bias results (including that subjects self-reporting outcomes were likely not aware of reported links between the exposure and outcome lack of blinding is unlikely to bias a particular outcome).</p> |

| Q | Target organ:<br>Endpoint:<br>Intervention/Exposure:                    | Rating | Explanation for expert judgement                                                                                                                                                                                                                                                                                                                                                                                                                                                                                                                                                                                                                                                                                                                                                                                                                                                                                                                                                                                                                                                                                                                                                                                                                                                                                                                                                                                                                                                                                                                                                                                                                                                                                                                                         |
|---|-------------------------------------------------------------------------|--------|--------------------------------------------------------------------------------------------------------------------------------------------------------------------------------------------------------------------------------------------------------------------------------------------------------------------------------------------------------------------------------------------------------------------------------------------------------------------------------------------------------------------------------------------------------------------------------------------------------------------------------------------------------------------------------------------------------------------------------------------------------------------------------------------------------------------------------------------------------------------------------------------------------------------------------------------------------------------------------------------------------------------------------------------------------------------------------------------------------------------------------------------------------------------------------------------------------------------------------------------------------------------------------------------------------------------------------------------------------------------------------------------------------------------------------------------------------------------------------------------------------------------------------------------------------------------------------------------------------------------------------------------------------------------------------------------------------------------------------------------------------------------------|
|   |                                                                         | -      | <p><i>For cohort studies:</i> There is indirect evidence that the outcome assessment method is an insensitive instrument (e.g., a questionnaire used to assess outcomes with no information on validation), OR the length of follow up differed by study group, OR there is indirect evidence that it was possible for outcome assessors (including study subjects if outcomes were self-reported) to infer the study group prior to reporting outcomes, OR there is insufficient information provided about blinding of outcome assessors (record 'NR' as basis for answer).</p> <p><i>For case-control studies:</i> There is indirect evidence that the outcome was assessed in cases (i.e., case definition) using an insensitive instrument, OR there is insufficient information provided about how cases were identified (record 'NR' as basis for answer), OR there is indirect evidence that it was possible for outcome assessors to infer the exposure level prior to reporting outcomes (including that subjects self-reporting outcomes were likely aware of reported links between the exposure and outcome), OR there is insufficient information provided about blinding of outcome assessors (record 'NR' as basis for answer).</p> <p><i>For cross-sectional studies:</i> There is indirect evidence that the outcome assessment method is an insensitive instrument, OR there is indirect evidence that it was possible for outcome assessors to infer the exposure level prior to reporting outcomes (including that subjects self-reporting outcomes were likely aware of reported links between the exposure and outcome), OR there is insufficient information provided about blinding of outcome assessors (record 'NR' as basis for answer).</p> |
|   |                                                                         | --     | <p><i>For cohort studies:</i> There is direct evidence that the outcome assessment method is an insensitive instrument, OR the length of follow up differed by study group, OR there is direct evidence for lack of adequate blinding of outcome assessors (including study subjects if outcomes were self-reported), including no blinding or incomplete blinding.</p> <p><i>For case-control studies:</i> There is direct evidence that the outcome was assessed in cases (i.e., case definition) using an insensitive instrument, OR there is direct evidence that outcome assessors were aware of the exposure level prior to reporting outcomes (including that subjects self-reporting outcomes were aware of reported links between the exposure and outcome).</p> <p><i>For cross-sectional studies:</i> There is direct evidence that the outcome assessment method is an insensitive instrument, OR there is direct evidence that outcome assessors were aware of the exposure level prior to reporting outcomes (including that subjects self-reporting outcomes were aware of reported links between the exposure and outcome).</p>                                                                                                                                                                                                                                                                                                                                                                                                                                                                                                                                                                                                                          |
|   |                                                                         | NA     | Not applicable                                                                                                                                                                                                                                                                                                                                                                                                                                                                                                                                                                                                                                                                                                                                                                                                                                                                                                                                                                                                                                                                                                                                                                                                                                                                                                                                                                                                                                                                                                                                                                                                                                                                                                                                                           |
| 6 | <b>Selective reporting:</b><br><br>Were all measured outcomes reported? | ++     | There is direct evidence that all of the study's measured outcomes (primary and secondary) outlined in the protocol, methods, abstract, and/or introduction (that are relevant for the evaluation) have been reported. This would include outcomes reported with sufficient detail to be included in meta-analysis or fully tabulated during data extraction and analyses had been planned in advance.                                                                                                                                                                                                                                                                                                                                                                                                                                                                                                                                                                                                                                                                                                                                                                                                                                                                                                                                                                                                                                                                                                                                                                                                                                                                                                                                                                   |



| Q | Target organ:<br>Endpoint:<br>Intervention/Exposure: | Rating | Explanation for expert judgement                                                                                                                                                                                                                                                                                                                                                                                                                                                                                                                                                                                                                                              |
|---|------------------------------------------------------|--------|-------------------------------------------------------------------------------------------------------------------------------------------------------------------------------------------------------------------------------------------------------------------------------------------------------------------------------------------------------------------------------------------------------------------------------------------------------------------------------------------------------------------------------------------------------------------------------------------------------------------------------------------------------------------------------|
|   |                                                      | +      | There is indirect evidence that all of the study's measured outcomes (primary and secondary) outlined in the methods, abstract, and/or introduction (that are relevant for the evaluation) have been reported <b>OR</b> analyses that had not been planned in advance (i.e. retrospective unplanned subgroup analyses) are clearly indicated as such and it is deemed that the unplanned analyses were appropriate and selective reporting would not appreciably bias results (e.g. appropriate analyses of an unexpected effect). This would include outcomes reported with insufficient detail such as only reporting that results were statistically significant (or not). |
|   |                                                      | -      | There is indirect evidence that all of the study's measured outcomes (primary and secondary) outlined in the methods, abstract, and/or introduction (that are relevant for the evaluation) have been reported <b>OR</b> there is indirect evidence that unplanned analyses were included that may appreciably bias results. OR there is insufficient information provided about selective outcome reporting (record 'NR' as basis for answer).                                                                                                                                                                                                                                |
|   |                                                      | --     | There is direct evidence that all of the study's measured outcomes (primary and secondary) outlined in the methods, abstract, and/or introduction (that are relevant for the evaluation) have not been reported. In addition to not reporting outcomes, this would include reporting outcomes based on composite score without individual outcome components or outcomes reported using measurements, analysis methods or subsets of the data (e.g. subscales) that were not pre-specified or reporting outcomes not pre-specified, or that unplanned analyses were included that would appreciably bias results.                                                             |
|   |                                                      | NA     | Not applicable                                                                                                                                                                                                                                                                                                                                                                                                                                                                                                                                                                                                                                                                |

++: definitely low risk of bias, +: probably low risk of bias, -: probably high risk of bias, --: definitely high risk of bias.

**Table 24.** Appraisal tool for experimental animal studies (adapted from NTP Risk of Bias tool)

| Question | Target organ:<br>Endpoint:<br>Intervention/Exp<br>osure:                                                                                                                           | Rating | Explanation for expert judgement                                                                                                                                                                                                                                                                                                                                                                                                                                                                                                                                                                                                                                                                                                                                                                                                                                                                                                                                                                                                                                                                                                                                                                                                                                                                 |
|----------|------------------------------------------------------------------------------------------------------------------------------------------------------------------------------------|--------|--------------------------------------------------------------------------------------------------------------------------------------------------------------------------------------------------------------------------------------------------------------------------------------------------------------------------------------------------------------------------------------------------------------------------------------------------------------------------------------------------------------------------------------------------------------------------------------------------------------------------------------------------------------------------------------------------------------------------------------------------------------------------------------------------------------------------------------------------------------------------------------------------------------------------------------------------------------------------------------------------------------------------------------------------------------------------------------------------------------------------------------------------------------------------------------------------------------------------------------------------------------------------------------------------|
| <b>1</b> | <b>Selection bias:</b><br><br>Was administered dose or exposure level adequately randomised?<br><br>(including selection of groups during the study)?<br><br><b>KEY QUESTION A</b> | ++     | There is direct evidence that animals were allocated to any study group including controls using a method with a random component, <b>AND</b> there is direct evidence that the study used a concurrent control group as an indication that randomization covered all study groups.<br><br><b>Note:</b> Acceptable methods of randomization include: referring to a random number table, using a computer random number generator, coin tossing, shuffling cards or envelopes, throwing dice, or drawing of lots (Higgins and Green 2011). Restricted randomization (e.g., blocked randomization) to ensure particular allocation ratios will be considered low risk of bias. Similarly, stratified randomization and minimization approaches that attempt to minimize imbalance between groups on important prognostic factors (e.g., body weight) will be considered acceptable. This type of approach is used by NTP, i.e., random number generator with body weight as a covariate.<br><b>Note:</b> Investigator-selection of animals from a cage is not considered random allocation because animals may not have an equal chance of being selected, e.g., investigator selecting animals with this method may inadvertently choose healthier, easier to catch, or less aggressive animals. |
|          |                                                                                                                                                                                    | +      | There is indirect evidence that animals were allocated to any study group including controls using a method with a random component (i.e., authors state that allocation was random, without description of the method used), <b>AND</b> there is direct or indirect evidence that the study used a concurrent control group as an indication that randomization covered all study groups,<br><b>OR</b> it is deemed that allocation without a clearly random component during the study would not appreciably bias results. For example, approaches such as biased coin or urn randomization, replacement randomization, mixed randomization, and maximal randomization may require consultation with a statistician to determine risk-of-bias rating (Higgins and Green, 2011).                                                                                                                                                                                                                                                                                                                                                                                                                                                                                                                |
|          |                                                                                                                                                                                    | -      | There is indirect evidence that animals were allocated to study groups using a method with a non-random component, <b>OR</b> there is indirect evidence that there was a lack of a concurrent control group, <b>OR</b> there is insufficient information provided about how subjects were allocated to study groups (record 'NR' as basis for answer).<br><b>Note:</b> Non-random allocation methods may be systematic, but have the potential to allow researchers to anticipate the allocation of animals to study groups (Higgins and Green 2011). Such 'quasi-random' methods include investigator-selection of animals from a cage, alternation, assignment based on shipment receipt date, date of birth, or animal number.                                                                                                                                                                                                                                                                                                                                                                                                                                                                                                                                                                |
|          |                                                                                                                                                                                    | --     | There is direct evidence that animals were allocated to study groups using a non-random method including judgment of the investigator, the results of a laboratory test or a series of tests (Higgins and Green 2011), <b>OR</b> there is direct evidence that there was a lack of a concurrent control group, indicating that randomization did not cover all study groups.                                                                                                                                                                                                                                                                                                                                                                                                                                                                                                                                                                                                                                                                                                                                                                                                                                                                                                                     |
|          |                                                                                                                                                                                    | NA     | Not applicable                                                                                                                                                                                                                                                                                                                                                                                                                                                                                                                                                                                                                                                                                                                                                                                                                                                                                                                                                                                                                                                                                                                                                                                                                                                                                   |
| <b>2</b> | <b>Confounding bias:</b>                                                                                                                                                           | ++     | There is direct evidence that appropriate adjustments or explicit considerations were made for primary covariates and confounders (e.g. unintended chemical co-exposures)in the final analyses.                                                                                                                                                                                                                                                                                                                                                                                                                                                                                                                                                                                                                                                                                                                                                                                                                                                                                                                                                                                                                                                                                                  |
|          |                                                                                                                                                                                    | +      | There is indirect evidence that appropriate adjustments or explicit considerations were made for primary covariates and                                                                                                                                                                                                                                                                                                                                                                                                                                                                                                                                                                                                                                                                                                                                                                                                                                                                                                                                                                                                                                                                                                                                                                          |

| Question | Target organ:<br>Endpoint:<br>Intervention/Exp<br>osure:                                                                                                | Rating | Explanation for expert judgement                                                                                                                                                                                                                                                                                                                                                                                                                                                                                                                                                                                                                |
|----------|---------------------------------------------------------------------------------------------------------------------------------------------------------|--------|-------------------------------------------------------------------------------------------------------------------------------------------------------------------------------------------------------------------------------------------------------------------------------------------------------------------------------------------------------------------------------------------------------------------------------------------------------------------------------------------------------------------------------------------------------------------------------------------------------------------------------------------------|
|          | Did the study design or analyses account for important confounding and modifying variables (including unintended co-exposures) in experimental studies? |        | confounders (e.g. unintended chemical co-exposures) in the final analyses, <b>OR</b> it is deemed that confounding would not appreciably bias results.                                                                                                                                                                                                                                                                                                                                                                                                                                                                                          |
|          |                                                                                                                                                         | -      | There is indirect evidence that no appropriate adjustments or explicit considerations were made for primary covariates and confounders (e.g. unintended chemical co-exposures) in the final analyses, <b>OR</b> there is insufficient information provided about confounding.                                                                                                                                                                                                                                                                                                                                                                   |
|          |                                                                                                                                                         | --     | There is direct evidence that no appropriate adjustments or explicit considerations were made for primary covariates and confounders (e.g. unintended chemical co-exposures) in the final analyses.                                                                                                                                                                                                                                                                                                                                                                                                                                             |
|          |                                                                                                                                                         | NA     | Not applicable                                                                                                                                                                                                                                                                                                                                                                                                                                                                                                                                                                                                                                  |
| <b>3</b> | <b>Performance bias:</b><br><br>Were experimental conditions identical across study groups?                                                             | ++     | There is direct evidence that same vehicle was used in control and experimental animals, <b>AND</b> there is direct evidence that non-treatment-related experimental conditions were identical across study groups (i.e., the study report explicitly provides this level of detail).                                                                                                                                                                                                                                                                                                                                                           |
|          |                                                                                                                                                         | +      | There is indirect evidence that the same vehicle was used in control and experimental animals, <b>OR</b> it is deemed that the vehicle used would not appreciably bias results, <b>AND</b> as described above, identical non-treatment-related experimental conditions are assumed if authors did not report differences in housing or husbandry.                                                                                                                                                                                                                                                                                               |
|          |                                                                                                                                                         | -      | There is indirect evidence that the vehicle differed between control and experimental animals, <b>OR</b> authors did not report the vehicle used (record 'NR' as basis for answer), <b>OR</b> there is indirect evidence that non-treatment-related experimental conditions were not comparable between study groups.                                                                                                                                                                                                                                                                                                                           |
|          |                                                                                                                                                         | --     | There is direct evidence from the study report that control animals were untreated, or treated with a different vehicle than experimental animals, <b>OR</b> there is direct evidence that non-treatment-related experimental conditions were not comparable between study groups.                                                                                                                                                                                                                                                                                                                                                              |
|          |                                                                                                                                                         | NA     | Not applicable                                                                                                                                                                                                                                                                                                                                                                                                                                                                                                                                                                                                                                  |
| <b>4</b> | <b>Performance bias:</b><br><br>Were the outcome assessors blinded to study group or exposure level?                                                    | ++     | There is direct evidence that the research personnel were adequately blinded to study group, and it is unlikely that they could have broken the blinding during the study. Methods used to ensure blinding include central allocation; sequentially numbered treatment containers of identical appearance; sequentially numbered animal cages; or equivalent methods.                                                                                                                                                                                                                                                                           |
|          |                                                                                                                                                         | +      | There is indirect evidence that the research personnel were adequately blinded to study group, and it is unlikely that they could have broken the blinding during the study, <b>OR</b> it is deemed that lack of adequate blinding during the study would not appreciably bias results. This would include cases where blinding was not possible but research personnel took steps to minimize potential bias, such as restricting the knowledge of study group to veterinary or supervisory personnel monitoring for overt toxicity, or randomized husbandry or handling practices (e.g., placement in the animal room, necropsy order, etc.). |
|          |                                                                                                                                                         | -      | There is indirect evidence that the research personnel were not adequately blinded to study group, <b>OR</b> there is insufficient information provided about blinding to study group during the study (record 'NR' as basis for answer).                                                                                                                                                                                                                                                                                                                                                                                                       |
|          |                                                                                                                                                         | --     | There is direct evidence that the research personnel were not adequately blinded to study group.                                                                                                                                                                                                                                                                                                                                                                                                                                                                                                                                                |
|          |                                                                                                                                                         | NA     | Not applicable                                                                                                                                                                                                                                                                                                                                                                                                                                                                                                                                                                                                                                  |

| Question | Target organ:<br>Endpoint:<br>Intervention/Exp<br>osure:                                                                    | Rating | Explanation for expert judgement                                                                                                                                                                                                                                                                                                                                                                                                                                                                                                                                                                                                                                                                                        |
|----------|-----------------------------------------------------------------------------------------------------------------------------|--------|-------------------------------------------------------------------------------------------------------------------------------------------------------------------------------------------------------------------------------------------------------------------------------------------------------------------------------------------------------------------------------------------------------------------------------------------------------------------------------------------------------------------------------------------------------------------------------------------------------------------------------------------------------------------------------------------------------------------------|
| <b>5</b> | <b>Attrition/exclusion bias:</b><br><br>Were outcome data completely reported without attrition or exclusion from analysis? | ++     | There is direct evidence that loss of animals was adequately addressed and reasons were documented when animals were removed from a study. Acceptable handling of attrition includes: very little missing outcome data; reasons for missing animals unlikely to be related to outcome (or for survival data, censoring unlikely to be introducing bias); missing outcome data balanced in numbers across study groups, with similar reasons for missing data across groups; missing outcomes is not enough to impact the effect estimate, OR missing data have been imputed using appropriate methods (ensuring that characteristics of animals are not significantly different from animals retained in the analysis). |
|          |                                                                                                                             | +      | There is indirect evidence that loss of animals was adequately addressed and reasons were documented when animals were removed from a study, OR it is deemed that the proportion lost would not appreciably bias results. This would include reports of no statistical differences in characteristics of animals removed from the study from those remaining in the study.                                                                                                                                                                                                                                                                                                                                              |
|          |                                                                                                                             | -      | There is indirect evidence that loss of animals was unacceptably large and not adequately addressed, OR there is insufficient information provided about loss of animals (record 'NR' as basis for answer).                                                                                                                                                                                                                                                                                                                                                                                                                                                                                                             |
|          |                                                                                                                             | --     | There is direct evidence that loss of animals was unacceptably large and not adequately addressed. Unacceptable handling of attrition or exclusion includes: reason for loss is likely to be related to true outcome, with either imbalance in numbers or reasons for loss across study groups.                                                                                                                                                                                                                                                                                                                                                                                                                         |
|          |                                                                                                                             | NA     | Not applicable                                                                                                                                                                                                                                                                                                                                                                                                                                                                                                                                                                                                                                                                                                          |
| <b>6</b> | <b>Detection bias:</b><br><br>Can we be confident in the exposure characterisation?<br><br><b>KEY QUESTION B</b>            | ++     | There is direct evidence that the exposure (including purity and stability of the test substance and compliance with the treatment, if applicable) was independently characterized and purity confirmed generally as $\geq 99\%$ for single substance or non-mixture evaluations.                                                                                                                                                                                                                                                                                                                                                                                                                                       |
|          |                                                                                                                             | +      | There is indirect evidence that the exposure (including purity and stability of the test substance and compliance with the treatment, if applicable) was independently characterized and purity confirmed generally as $\geq 99\%$ (i.e., the supplier of the chemical provides documentation of the purity of the chemical), <b>OR</b> direct evidence that purity was independently confirmed as $\geq 98\%$ it is deemed that impurities of up to 2% would not appreciably bias results, <b>AND</b> there is indirect evidence that exposure was consistently administered (i.e., with the same method and time-frame) across treatment groups.                                                                      |
|          |                                                                                                                             | -      | There is indirect evidence that the exposure (including purity and stability of the test substance and compliance with the treatment, if applicable) was assessed using poorly validated methods, <b>OR</b> there is insufficient information provided about the validity of the exposure assessment method, but no evidence for concern (record 'NR' as basis for answer).                                                                                                                                                                                                                                                                                                                                             |
|          |                                                                                                                             | --     | There is direct evidence that the exposure (including purity and stability of the test substance and compliance with the treatment, if applicable) was assessed using poorly validated methods.                                                                                                                                                                                                                                                                                                                                                                                                                                                                                                                         |
|          |                                                                                                                             | NA     | Not applicable                                                                                                                                                                                                                                                                                                                                                                                                                                                                                                                                                                                                                                                                                                          |
| <b>7</b> | <b>Detection bias:</b><br><br>Can we be confident in the outcome Assessment?                                                | ++     | There is direct evidence that the outcome was assessed using well-established methods (the gold standard), <b>AND</b> assessed at the same length of time after initial exposure in all study groups, <b>AND</b> there is direct evidence that the outcome assessors were adequately blinded to the study group, and it is unlikely that they could have broken the blinding prior to reporting outcomes.                                                                                                                                                                                                                                                                                                               |
|          |                                                                                                                             | +      | There is indirect evidence that the outcome was assessed using acceptable methods (i.e., deemed valid and reliable but not the gold standard), <b>AND</b> assessed at the same length of time after initial exposure in all study groups, <b>OR</b> it is deemed that the outcome assessment methods used would not appreciably bias results, <b>AND</b> there is indirect evidence that the outcome                                                                                                                                                                                                                                                                                                                    |

| Question | Target organ:<br>Endpoint:<br>Intervention/Exp<br>osure:                                                                                                       | Rating | Explanation for expert judgement                                                                                                                                                                                                                                                                                                                                                                                                                                                                                                                                                                                                                                                           |
|----------|----------------------------------------------------------------------------------------------------------------------------------------------------------------|--------|--------------------------------------------------------------------------------------------------------------------------------------------------------------------------------------------------------------------------------------------------------------------------------------------------------------------------------------------------------------------------------------------------------------------------------------------------------------------------------------------------------------------------------------------------------------------------------------------------------------------------------------------------------------------------------------------|
|          | (Are we confident that valid, reliable and sensitive methods to assess the outcome have been consistently applied across groups?)<br><br><b>KEY QUESTION C</b> |        | assessors were adequately blinded to the study group, and it is unlikely that they could have broken the blinding prior to reporting outcomes, <b>OR</b> it is deemed that lack of adequate blinding of outcome assessors would not appreciably bias results, which is more likely to apply to objective outcome measures. For some outcomes, particularly histopathology assessment, outcome assessors are not blind to study group as they require comparison to the control to appropriately judge the outcome, but additional measures such as multiple levels of independent review by trained pathologists can minimize this potential bias.                                         |
|          |                                                                                                                                                                | -      | There is indirect evidence that the outcome assessment method is an insensitive instrument, <b>OR</b> the length of time after initial exposure differed by study group, <b>OR</b> there is indirect evidence that it was possible for outcome assessors to infer the study group prior to reporting outcomes without sufficient quality control measures, <b>OR</b> there is insufficient information provided about blinding of outcome assessors (record 'NR' as basis for answer).                                                                                                                                                                                                     |
|          |                                                                                                                                                                | --     | There is direct evidence that the outcome assessment method is an insensitive instrument, <b>OR</b> the length of time after initial exposure differed by study group, <b>OR</b> there is direct evidence for lack of adequate blinding of outcome assessors, including no blinding or incomplete blinding without quality control measures.                                                                                                                                                                                                                                                                                                                                               |
|          |                                                                                                                                                                | NA     | Not applicable                                                                                                                                                                                                                                                                                                                                                                                                                                                                                                                                                                                                                                                                             |
| <b>8</b> | <b>Selective reporting bias:</b><br><br>Were all measured outcomes reported?                                                                                   | ++     | There is direct evidence that all of the study's measured outcomes (primary and secondary) outlined in the protocol, methods, abstract, and/or introduction (that are relevant for the evaluation) have been reported. This would include outcomes reported with sufficient detail to be included in meta-analysis or fully tabulated during data extraction and analyses had been planned in advance.                                                                                                                                                                                                                                                                                     |
|          |                                                                                                                                                                | +      | There is indirect evidence that all of the study's measured outcomes (primary and secondary) outlined in the protocol, methods, abstract, and/or introduction (that are relevant for the evaluation) have been reported, <b>OR</b> analyses that had not been planned in advance (i.e., retrospective unplanned subgroup analyses) are clearly indicated as such and it is deemed that the unplanned analyses were appropriate and selective reporting would not appreciably bias results (e.g., appropriate analyses of an unexpected effect). This would include outcomes reported with insufficient detail such as only reporting that results were statistically significant (or not). |
|          |                                                                                                                                                                | -      | There is indirect evidence that all of the study's measured outcomes (primary and secondary) outlined in the protocol, methods, abstract, and/or introduction (that are relevant for the evaluation) have been reported, <b>OR</b> and there is indirect evidence that unplanned analyses were included that may appreciably bias results, <b>OR</b> there is insufficient information provided about selective outcome reporting (record 'NR' as basis for answer).                                                                                                                                                                                                                       |
|          |                                                                                                                                                                | --     | There is direct evidence that all of the study's measured outcomes (primary and secondary) outlined in the protocol, methods, abstract, and/or introduction (that are relevant for the evaluation) have not been reported. In addition to not reporting outcomes, this would include reporting outcomes based on composite score without individual outcome components or outcomes reported using measurements, analysis methods or subsets of the data (e.g., subscales) that were not pre-specified or reporting outcomes not pre-specified, or that unplanned analyses were included that would appreciably bias results.                                                               |
|          |                                                                                                                                                                | NA     | Not applicable                                                                                                                                                                                                                                                                                                                                                                                                                                                                                                                                                                                                                                                                             |
| <b>9</b> | <b>Other bias:</b>                                                                                                                                             | ++     | There is direct evidence that statistical methods were appropriate.                                                                                                                                                                                                                                                                                                                                                                                                                                                                                                                                                                                                                        |

| Question | Target organ:<br>Endpoint:<br>Intervention/Exp<br>osure:                                                                                                                                                                           | Rating | Explanation for expert judgement                                         |
|----------|------------------------------------------------------------------------------------------------------------------------------------------------------------------------------------------------------------------------------------|--------|--------------------------------------------------------------------------|
|          | Were statistical methods appropriate?                                                                                                                                                                                              | +      | There is indirect evidence that statistical methods were appropriate.    |
|          |                                                                                                                                                                                                                                    | -      | There is indirect evidence that no statistical methods were appropriate. |
|          |                                                                                                                                                                                                                                    | --     | There is direct evidence that no statistical methods were appropriate.   |
|          |                                                                                                                                                                                                                                    | NA     | Not applicable                                                           |
|          | One of the common statistical issues identified has been reporting of statistical tests that require normally distributed data (e.g., t-test or ANOVA) without reporting that the homogeneity of variance was tested or confirmed. | +      | There is indirect evidence that statistical methods were appropriate.    |
|          |                                                                                                                                                                                                                                    | -      | There is indirect evidence that no statistical methods were appropriate. |
|          |                                                                                                                                                                                                                                    | --     | There is direct evidence that no statistical methods were appropriate.   |
|          |                                                                                                                                                                                                                                    | NA     | Not applicable                                                           |

[++: definitely low risk of bias, +: probably low risk of bias, -: probably high risk of bias, --: definitely high risk of bias].

**Table 25.** Appraisal tool for farm and companion animal studies (controlled exposure) (adapted from NTP Risk of Bias tool)

| Question | Target organ:<br>Endpoint:<br>Intervention/Exposure:                                                                                                              | Rating | Explanation for expert judgement (wording taken from the original OHAT document)                                                                                                                                                                                                                                                                                                                                                                                                                                                                                                                                                                   |
|----------|-------------------------------------------------------------------------------------------------------------------------------------------------------------------|--------|----------------------------------------------------------------------------------------------------------------------------------------------------------------------------------------------------------------------------------------------------------------------------------------------------------------------------------------------------------------------------------------------------------------------------------------------------------------------------------------------------------------------------------------------------------------------------------------------------------------------------------------------------|
| <b>1</b> | <b>Selection bias:</b><br><br>Was allocation to study groups adequately randomised (including selection of groups during the study)?<br><br><b>KEY QUESTION A</b> | ++     | There is direct evidence that at the time of assigning study groups the research personnel did not know what group animals were allocated to, and it is unlikely that they could have broken the blinding of allocation until after assignment was complete and irrevocable. Acceptable methods used to ensure allocation concealment include sequentially numbered treatment containers of identical appearance or equivalent methods.                                                                                                                                                                                                            |
|          |                                                                                                                                                                   | +      | There is indirect evidence that at the time of assigning study groups the research personnel did not know what group animals were allocated to and it is unlikely that they could have broken the blinding of allocation until after assignment was complete and irrevocable, <b>OR</b> it is deemed that lack of adequate allocation concealment would not appreciably bias results.                                                                                                                                                                                                                                                              |
|          |                                                                                                                                                                   | -      | There is indirect evidence that at the time of assigning study groups it was possible for the research personnel to know what group animals were allocated to, or it is likely that they could have broken the blinding of allocation before assignment was complete and irrevocable, <b>OR</b> there is insufficient information provided about allocation to study groups (record 'NR' as basis for answer).                                                                                                                                                                                                                                     |
|          |                                                                                                                                                                   | --     | There is direct evidence that at the time of assigning study groups it was possible for the research personnel to know what group animals were allocated to, or it is likely that they could have broken the blinding of allocation before assignment was complete and irrevocable.                                                                                                                                                                                                                                                                                                                                                                |
|          |                                                                                                                                                                   | NA     | Not applicable                                                                                                                                                                                                                                                                                                                                                                                                                                                                                                                                                                                                                                     |
| <b>2</b> | <b>Detection bias:</b><br><br>Can we be confident in the exposure characterisation?<br><br><b>KEY QUESTION B</b>                                                  | ++     | There is direct evidence that the exposure (including purity and stability of the test substance and compliance with the treatment, if applicable) was independently characterized and purity confirmed generally as $\geq 99\%$ for single substance or non-mixture evaluations.                                                                                                                                                                                                                                                                                                                                                                  |
|          |                                                                                                                                                                   | +      | There is indirect evidence that the exposure (including purity and stability of the test substance and compliance with the treatment, if applicable) was independently characterized and purity confirmed generally as $\geq 99\%$ (i.e., the supplier of the chemical provides documentation of the purity of the chemical), <b>OR</b> direct evidence that purity was independently confirmed as $\geq 98\%$ it is deemed that impurities of up to 2% would not appreciably bias results, <b>AND</b> there is indirect evidence that exposure was consistently administered (i.e., with the same method and time-frame) across treatment groups. |
|          |                                                                                                                                                                   | -      | There is indirect evidence that the exposure (including purity and stability of the test substance and compliance with the treatment, if applicable) was assessed using poorly validated methods, <b>OR</b> there is insufficient information provided about the validity of the exposure assessment method, but no evidence for concern (record 'NR' as basis for answer).                                                                                                                                                                                                                                                                        |
|          |                                                                                                                                                                   | --     | There is direct evidence that the exposure (including purity and stability of the test substance and compliance with the treatment, if applicable) was assessed using poorly validated methods.                                                                                                                                                                                                                                                                                                                                                                                                                                                    |
|          |                                                                                                                                                                   | NA     | Not applicable                                                                                                                                                                                                                                                                                                                                                                                                                                                                                                                                                                                                                                     |
| <b>3</b> | <b>Detection bias:</b><br><br>Can we be confident in the                                                                                                          | ++     | There is direct evidence that the outcome was assessed using well-established methods (the gold standard), <b>AND</b> assessed at the same length of time after initial exposure in all study groups, <b>AND</b> there is direct evidence that the outcome assessors were adequately blinded to the study group, and it is unlikely that they could have                                                                                                                                                                                                                                                                                           |



| Question | Target organ:<br>Endpoint:<br>Intervention/Exposure:                                                                                                                             | Rating | Explanation for expert judgement (wording taken from the original OHAT document)                                                                                                                                                                                                                                                                                                                                                                                                                                                                                                                                                                                                                                                                                                                                                                                                                                                                                                                                                                        |
|----------|----------------------------------------------------------------------------------------------------------------------------------------------------------------------------------|--------|---------------------------------------------------------------------------------------------------------------------------------------------------------------------------------------------------------------------------------------------------------------------------------------------------------------------------------------------------------------------------------------------------------------------------------------------------------------------------------------------------------------------------------------------------------------------------------------------------------------------------------------------------------------------------------------------------------------------------------------------------------------------------------------------------------------------------------------------------------------------------------------------------------------------------------------------------------------------------------------------------------------------------------------------------------|
|          | outcome Assessment? Are we confident that valid, reliable and sensitive methods to assess the outcome have been consistently applied across groups?<br><br><b>KEY QUESTION C</b> |        | broken the blinding prior to reporting outcomes.                                                                                                                                                                                                                                                                                                                                                                                                                                                                                                                                                                                                                                                                                                                                                                                                                                                                                                                                                                                                        |
|          |                                                                                                                                                                                  | +      | There is indirect evidence that the outcome was assessed using acceptable methods (i.e., deemed valid and reliable but not the gold standard), <b>AND</b> assessed at the same length of time after initial exposure in all study groups, <b>OR</b> it is deemed that the outcome assessment methods used would not appreciably bias results, <b>AND</b> there is indirect evidence that the outcome assessors were adequately blinded to the study group, and it is unlikely that they could have broken the blinding prior to reporting outcomes, <b>OR</b> it is deemed that lack of adequate blinding of outcome assessors would not appreciably bias results, which is more likely to apply to objective outcome measures. For some outcomes, particularly histopathology assessment, outcome assessors are not blind to study group as they require comparison to the control to appropriately judge the outcome, but additional measures such as multiple levels of independent review by trained pathologists can minimize this potential bias. |
|          |                                                                                                                                                                                  | -      | There is indirect evidence that the outcome assessment method is an insensitive instrument, <b>OR</b> the length of time after initial exposure differed by study group, <b>OR</b> there is indirect evidence that it was possible for outcome assessors to infer the study group prior to reporting outcomes without sufficient quality control measures, <b>OR</b> there is insufficient information provided about blinding of outcome assessors (record 'NR' as basis for answer).                                                                                                                                                                                                                                                                                                                                                                                                                                                                                                                                                                  |
|          |                                                                                                                                                                                  | --     | There is direct evidence that the outcome assessment method is an insensitive instrument, <b>OR</b> the length of time after initial exposure differed by study group, <b>OR</b> there is direct evidence for lack of adequate blinding of outcome assessors, including no blinding or incomplete blinding without quality control measures.                                                                                                                                                                                                                                                                                                                                                                                                                                                                                                                                                                                                                                                                                                            |
|          |                                                                                                                                                                                  | NA     | Not applicable                                                                                                                                                                                                                                                                                                                                                                                                                                                                                                                                                                                                                                                                                                                                                                                                                                                                                                                                                                                                                                          |

[++: definitely low risk of bias, +: probably low risk of bias, -: probably high risk of bias, --: definitely high risk of bias].

**Table 26.** Appraisal tool for **farm and companion animal studies** (field exposure) (adapted from NTP Risk of Bias tool)

|          |                                                                                             |    |                                                                                                                                                                                                                                                                                                                                                                                                                                                                                                                                                                                                                                                                                                                                                                                                                                                                                                                                                                                                                                                                                                                                                                                                                                                                                                                                                                                                                                                                                                                                                                                                                                                                                                                                                                                                     |
|----------|---------------------------------------------------------------------------------------------|----|-----------------------------------------------------------------------------------------------------------------------------------------------------------------------------------------------------------------------------------------------------------------------------------------------------------------------------------------------------------------------------------------------------------------------------------------------------------------------------------------------------------------------------------------------------------------------------------------------------------------------------------------------------------------------------------------------------------------------------------------------------------------------------------------------------------------------------------------------------------------------------------------------------------------------------------------------------------------------------------------------------------------------------------------------------------------------------------------------------------------------------------------------------------------------------------------------------------------------------------------------------------------------------------------------------------------------------------------------------------------------------------------------------------------------------------------------------------------------------------------------------------------------------------------------------------------------------------------------------------------------------------------------------------------------------------------------------------------------------------------------------------------------------------------------------|
| <b>1</b> | <b>Confounding bias:</b>                                                                    | ++ | <p>There is direct evidence that appropriate adjustments or explicit considerations were made for primary covariates and confounders in the final analyses through the use of statistical models to reduce research-specific bias including standardization, matching, adjustment in multivariate model, stratification, propensity scoring, or other methods that were appropriately justified. Acceptable consideration of appropriate adjustment factors includes cases when the factor is not included in the final adjustment model because the author conducted analyses that indicated it did not need to be included, <b>AND</b> there is direct evidence that primary covariates and confounders were assessed using valid and reliable measurements, <b>AND</b> there is direct evidence that other exposures anticipated to bias results were not present or were appropriately measured and adjusted for. In occupational studies or studies of contaminated sites, other chemical exposures known to be associated with those settings were appropriately considered.</p> <p>For case-control studies: There is direct evidence that appropriate adjustments were made for primary covariates and confounders in the final analyses through the use of statistical models to reduce research specific bias including standardization, matching of cases and controls, adjustment in multivariate model, stratification, propensity scoring, or other methods were appropriately justified, <b>AND</b> there is direct evidence that primary covariates and confounders were assessed using valid and reliable measurements, <b>AND</b> there is direct evidence that other exposures anticipated to bias results were not present or were appropriately measured and adjusted for.</p> |
|          | Did the study design or analysis account for important confounding and modifying variables? | +  | <p>There is indirect evidence that appropriate adjustments were made, <b>OR</b> it is deemed that not considering or only considering a partial list of covariates or confounders in the final analyses would not appreciably bias results. <b>AND</b> there is evidence (direct or indirect) that primary covariates and confounders were assessed using valid and reliable measurements, <b>OR</b> it is deemed that the measures used would not appreciably bias results (i.e., the authors justified the validity of the measures from previously published research), <b>AND</b> there is evidence (direct or indirect) that other co-exposures anticipated to bias results were not present or were appropriately adjusted for,</p> <p><b>OR</b> it is deemed that co-exposures present would not appreciably bias results.</p> <p>Note: As discussed above, this includes insufficient information provided on co-exposures in general population studies.</p>                                                                                                                                                                                                                                                                                                                                                                                                                                                                                                                                                                                                                                                                                                                                                                                                                               |
|          | <b>KEY QUESTION D</b>                                                                       | -  | <p>There is indirect evidence that the distribution of primary covariates and known confounders differed between the groups and was not appropriately adjusted for in the final analyses, <b>OR</b> there is insufficient information provided about the distribution of known confounders (record 'NR' as basis for answer), <b>OR</b> there is indirect evidence that primary covariates and confounders were assessed using measurements of unknown validity, <b>OR</b> there is insufficient information provided about the measurement techniques used to assess primary covariates and confounders (record 'NR' as basis for answer), <b>OR</b> there is indirect evidence that there was an unbalanced provision of additional co-exposures across the primary study groups, which were not appropriately adjusted for, <b>OR</b> there is insufficient information provided about co-exposures in occupational studies or studies of contaminated sites where high exposures to other chemical exposures would have been reasonably anticipated</p>                                                                                                                                                                                                                                                                                                                                                                                                                                                                                                                                                                                                                                                                                                                                         |

|   |                                                                                                                  |                                                                                                                                                                                                                                                                                                                                                                                                                                                                                                                                                                                                                                                                                                                                                                                                                                                                                                                                                                                                                                                                                                                                                                                                                                                                                                                                                                                                                                                                                                                                                                                                                                                                                                                                                                                           |
|---|------------------------------------------------------------------------------------------------------------------|-------------------------------------------------------------------------------------------------------------------------------------------------------------------------------------------------------------------------------------------------------------------------------------------------------------------------------------------------------------------------------------------------------------------------------------------------------------------------------------------------------------------------------------------------------------------------------------------------------------------------------------------------------------------------------------------------------------------------------------------------------------------------------------------------------------------------------------------------------------------------------------------------------------------------------------------------------------------------------------------------------------------------------------------------------------------------------------------------------------------------------------------------------------------------------------------------------------------------------------------------------------------------------------------------------------------------------------------------------------------------------------------------------------------------------------------------------------------------------------------------------------------------------------------------------------------------------------------------------------------------------------------------------------------------------------------------------------------------------------------------------------------------------------------|
|   |                                                                                                                  | (record 'NR' as basis for answer).<br><br>For case-control studies: There is indirect evidence that the distribution of primary covariates and known confounders differed between cases and controls and was not investigated further, OR there is insufficient information provided about the distribution of known confounders in cases and controls (record 'NR' as basis for answer), OR there is indirect evidence that primary covariates and confounders were assessed using measurements of unknown validity, OR there is insufficient information provided about the measurement techniques used (record 'NR' as basis for answer), OR there is indirect evidence that there was an unbalanced provision of additional co-exposures across cases and controls, which were not appropriately adjusted for, OR there is insufficient information provided about co-exposures in occupational studies or studies of contaminated sites where high exposures to other chemical exposures would have been reasonably anticipated (record 'NR' as basis for answer).                                                                                                                                                                                                                                                                                                                                                                                                                                                                                                                                                                                                                                                                                                                   |
|   | --                                                                                                               | There is direct evidence that the distribution of primary covariates and known confounders differed between the groups, confounding was demonstrated, and was not appropriately adjusted for in the final analyses, OR there is direct evidence that primary covariates and confounders were assessed using non valid measurements, OR there is direct evidence that there was an unbalanced provision of additional co-exposures across the primary study groups, which were not appropriately adjusted for.<br><br>For case-control studies: There is direct evidence that the distribution of primary covariates and known confounders differed between cases and controls, confounding was demonstrated, but was not appropriately adjusted for in the final analyses, OR there is direct evidence that primary covariates and confounders were assessed using non valid measurements, OR there is direct evidence that there was an unbalanced provision of additional co-exposures across cases and controls, which were not appropriately adjusted for.                                                                                                                                                                                                                                                                                                                                                                                                                                                                                                                                                                                                                                                                                                                            |
|   | NA                                                                                                               | Not applicable                                                                                                                                                                                                                                                                                                                                                                                                                                                                                                                                                                                                                                                                                                                                                                                                                                                                                                                                                                                                                                                                                                                                                                                                                                                                                                                                                                                                                                                                                                                                                                                                                                                                                                                                                                            |
| 2 | <b>Detection bias:</b><br><br>Can we be confident in the exposure characterisation?<br><br><b>KEY QUESTION E</b> | <p>++</p> <p>There is direct evidence that exposure was consistently assessed (i.e. under the same method and time-frame) using well-established methods that directly measure exposure (e.g., measurement of the chemical in air or measurement of the chemical in blood, plasma, urine, etc.), OR exposure was assessed using less-established methods that directly measure exposure and are validated against well-established methods.</p> <p>+</p> <p>There is indirect evidence that the exposure was consistently assessed using well-established methods that directly measure exposure, OR exposure was assessed using indirect measures (e.g., questionnaire or occupational exposure assessment by a certified industrial hygienist) that have been validated or empirically shown to be consistent with methods that directly measure exposure (i.e., inter-methods validation: one method vs. another).</p> <p>-</p> <p>There is indirect evidence that the exposure was assessed using poorly validated methods that directly measure exposure, OR there is direct evidence that the exposure was assessed using indirect measures that have not been validated or empirically shown to be consistent with methods that directly measure exposure (e.g., a job-exposure matrix or self-report without validation) (record 'NR' as basis for answer), OR there is insufficient information provided about the exposure assessment, including validity and reliability, but no evidence for concern about the method used (record 'NR' as basis for answer).</p> <p>--</p> <p>There is direct evidence that the exposure was assessed using methods with poor validity, OR evidence of exposure misclassification (e.g., differential recall of self-reported exposure).</p> |

|   |                                                                                                           |    |                                                                                                                                                                                                                                                                                                                                                                                                                                                                                                                                                                                                                                                                                                                                                                                                                                                                                                                                                                                                                                                                                                                                                                                                                                                                                                                                                                                                                                                                                                                                                                                                                                                                                                                                                                                                                                                                                                                                                                                                                                                                                                                                                                                                                                                                                                                                                                                                                                                                    |
|---|-----------------------------------------------------------------------------------------------------------|----|--------------------------------------------------------------------------------------------------------------------------------------------------------------------------------------------------------------------------------------------------------------------------------------------------------------------------------------------------------------------------------------------------------------------------------------------------------------------------------------------------------------------------------------------------------------------------------------------------------------------------------------------------------------------------------------------------------------------------------------------------------------------------------------------------------------------------------------------------------------------------------------------------------------------------------------------------------------------------------------------------------------------------------------------------------------------------------------------------------------------------------------------------------------------------------------------------------------------------------------------------------------------------------------------------------------------------------------------------------------------------------------------------------------------------------------------------------------------------------------------------------------------------------------------------------------------------------------------------------------------------------------------------------------------------------------------------------------------------------------------------------------------------------------------------------------------------------------------------------------------------------------------------------------------------------------------------------------------------------------------------------------------------------------------------------------------------------------------------------------------------------------------------------------------------------------------------------------------------------------------------------------------------------------------------------------------------------------------------------------------------------------------------------------------------------------------------------------------|
| 3 | <b>Detection bias:</b><br><br>Can we be confident in the outcome assessment?<br><br><b>KEY QUESTION F</b> | NA | Not applicable                                                                                                                                                                                                                                                                                                                                                                                                                                                                                                                                                                                                                                                                                                                                                                                                                                                                                                                                                                                                                                                                                                                                                                                                                                                                                                                                                                                                                                                                                                                                                                                                                                                                                                                                                                                                                                                                                                                                                                                                                                                                                                                                                                                                                                                                                                                                                                                                                                                     |
|   |                                                                                                           | ++ | <p>For cohort studies: There is direct evidence that the outcome was assessed using well-established methods (e.g. the 'gold standard'), AND subjects had been followed for the same length of time in all study groups. Acceptable assessment methods will depend on the outcome, but examples of such methods may include: objectively measured with diagnostic methods, measured by trained interviewers, obtained from registries.</p> <p>For case-control studies: There is direct evidence that the outcome was assessed in cases (i.e., case definition) and controls using well-established methods (the gold standard), AND subjects had been followed for the same length of time in all study groups, AND there is direct evidence that the outcome assessors (including study subjects, if outcomes were self-reported) were adequately blinded to the exposure level when outcome was assessed in cases (i.e., case definition) and controls.</p> <p>For cross-sectional studies: There is direct evidence that the outcome was assessed using well-established methods (the gold standard), AND there is direct evidence that the outcome assessors (including study subjects, if outcomes were self-reported) were adequately blinded to the exposure level, and it is unlikely that they could have broken the blinding prior to reporting outcomes.</p>                                                                                                                                                                                                                                                                                                                                                                                                                                                                                                                                                                                                                                                                                                                                                                                                                                                                                                                                                                                                                                                                                           |
|   |                                                                                                           | +  | <p>For cohort studies: There is indirect evidence that the outcome was assessed using acceptable methods (i.e. deemed valid and reliable but not the gold standard) AND subjects had been followed for the same length of time in all study groups [Acceptable, but not ideal assessment methods will depend on the outcome, but examples of such methods may include proxy reporting of outcomes and mining of data collected for other purposes], OR it is deemed that the outcome assessment methods used would not appreciably bias results, AND there is indirect evidence that the outcome assessors (including study subjects, if outcomes were self-reported) were adequately blinded to the study group, and it is unlikely that they could have broken the blinding prior to reporting outcomes,<br/>OR it is deemed that lack of adequate blinding of outcome assessors would not appreciably bias results, which is more likely to apply to objective outcome measures</p> <p>For case-control studies: There is indirect evidence that the outcome was assessed in cases (i.e., case definition) and controls using acceptable methods, AND subjects had been followed for the same length of time in all study groups, OR it is deemed that the outcome assessment methods used would not appreciably bias results, AND there is direct evidence that the outcome assessors were adequately blinded to the exposure level when reporting outcomes, OR it is deemed that lack of adequate blinding of outcome assessors would not appreciably bias results (including that subjects self-reporting outcomes were likely not aware of reported links between the exposure and outcome or lack of blinding is unlikely to bias a particular outcome).</p> <p>For cross-sectional studies: There is indirect evidence that the outcome was assessed using acceptable methods, OR it is deemed that the outcome assessment methods used would not appreciably bias results, AND there is indirect evidence that the outcome assessors were adequately blinded to the exposure level, and it is unlikely that they could have broken the blinding prior to reporting outcomes, OR it is deemed that lack of adequate blinding of outcome assessors would not appreciably bias results (including that subjects self-reporting outcomes were likely not aware of reported links between the exposure and outcome lack of blinding is unlikely to bias a</p> |

|  |    |                                                                                                                                                                                                                                                                                                                                                                                                                                                                                                                                                                                                                                                                                                                                                                                                                                                                                                                                                                                                                                                                                                                                                                                                                                                                                                                                                                                                                                                                                                                                                                                                                                                                                                                                                     |
|--|----|-----------------------------------------------------------------------------------------------------------------------------------------------------------------------------------------------------------------------------------------------------------------------------------------------------------------------------------------------------------------------------------------------------------------------------------------------------------------------------------------------------------------------------------------------------------------------------------------------------------------------------------------------------------------------------------------------------------------------------------------------------------------------------------------------------------------------------------------------------------------------------------------------------------------------------------------------------------------------------------------------------------------------------------------------------------------------------------------------------------------------------------------------------------------------------------------------------------------------------------------------------------------------------------------------------------------------------------------------------------------------------------------------------------------------------------------------------------------------------------------------------------------------------------------------------------------------------------------------------------------------------------------------------------------------------------------------------------------------------------------------------|
|  |    | particular outcome).                                                                                                                                                                                                                                                                                                                                                                                                                                                                                                                                                                                                                                                                                                                                                                                                                                                                                                                                                                                                                                                                                                                                                                                                                                                                                                                                                                                                                                                                                                                                                                                                                                                                                                                                |
|  | -  | <p>For cohort studies: There is indirect evidence that the outcome assessment method is an insensitive instrument (e.g., a questionnaire used to assess outcomes with no information on validation), OR the length of follow up differed by study group, OR there is indirect evidence that it was possible for outcome assessors (including study subjects if outcomes were self-reported) to infer the study group prior to reporting outcomes, OR there is insufficient information provided about blinding of outcome assessors (record 'NR' as basis for answer).</p> <p>For case-control studies: There is indirect evidence that the outcome was assessed in cases (i.e., case definition) using an insensitive instrument, OR there is insufficient information provided about how cases were identified (record 'NR' as basis for answer), OR there is indirect evidence that it was possible for outcome assessors to infer the exposure level prior to reporting outcomes (including that subjects self-reporting outcomes were likely aware of reported links between the exposure and outcome), OR there is insufficient information provided about blinding of outcome assessors (record 'NR' as basis for answer).</p> <p>For cross-sectional studies: There is indirect evidence that the outcome assessment method is an insensitive instrument, OR there is indirect evidence that it was possible for outcome assessors to infer the exposure level prior to reporting outcomes (including that subjects self-reporting outcomes were likely aware of reported links between the exposure and outcome), OR there is insufficient information provided about blinding of outcome assessors (record 'NR' as basis for answer).</p> |
|  | -  | <p>For cohort studies: There is direct evidence that the outcome assessment method is an insensitive instrument, OR the length of follow up differed by study group, OR there is direct evidence for lack of adequate blinding of outcome assessors (including study subjects if outcomes were self-reported), including no blinding or incomplete blinding.</p> <p>For case-control studies: There is direct evidence that the outcome was assessed in cases (i.e., case definition) using an insensitive instrument, OR there is direct evidence that outcome assessors were aware of the exposure level prior to reporting outcomes (including that subjects self-reporting outcomes were aware of reported links between the exposure and outcome).</p> <p>For cross-sectional studies: There is direct evidence that the outcome assessment method is an insensitive instrument, OR there is direct evidence that outcome assessors were aware of the exposure level prior to reporting outcomes (including that subjects self-reporting outcomes were aware of reported links between the exposure and outcome).</p>                                                                                                                                                                                                                                                                                                                                                                                                                                                                                                                                                                                                                          |
|  | NA | Not applicable                                                                                                                                                                                                                                                                                                                                                                                                                                                                                                                                                                                                                                                                                                                                                                                                                                                                                                                                                                                                                                                                                                                                                                                                                                                                                                                                                                                                                                                                                                                                                                                                                                                                                                                                      |

[++: definitely low risk of bias, +: probably low risk of bias, -: probably high risk of bias, --: definitely high risk of bias].

### A.1.2.3. Evaluating the confidence in the body of evidence<sup>4</sup>

Once the individual studies have been appraised for internal validity, the Working Group experts will evaluate the overall confidence in the evidence (i.e. group of studies addressing the same endpoint in experimental animal studies or in human studies or farm/companion animal studies) considering<sup>5</sup>:

- (i) Presence of effects at low doses, per line of evidence (human studies, experimental animal studies and farm/companion animal studies).
- (ii) Factors that can decrease the confidence in the evidence, such as unexplained inconsistency, indirectness, imprecision, publication bias, risk of bias.
- (iii) Factors that can increase the confidence in the evidence, such as large magnitude effects, dose response, residual confounding, cross-species/population/study consistency.

### A.1.2.4. Integration of the lines of evidence for hazard identification

#### Human hazard identification

The final critical endpoints will be identified by integrating evidence from both human and experimental animal lines of evidence considering the respective level of confidence (see Section A.1.2.3).

#### Farm and companion animal hazard identification

The critical endpoints will be identified considering the level of confidence described in Section A.1.2.3 above.

### A.1.2.5. Method to perform hazard characterisation

For each endpoint, dose-response assessment will be performed on relevant adverse effects for the identification of reference points (e.g. a no-observed-adverse-effect level (NOAEL) or a benchmark dose (BMD) and its lower confidence limit (BMDL) for a particular incidence of effect). The lowest reference point will be considered for the possible derivation of a health-based guidance value, such as a tolerable intake.

For the human hazard characterisation, data on the toxicokinetics (ADME and toxicokinetic modelling) will support the extrapolation of results from experimental animal studies and human studies to the general population. This information is also important to determine which uncertainty factors related to inter-species difference and inter-individual variability need to be taken into account when establishing a HBGV.

Information on mode of action of the target compounds and endpoints will also support this step. Mode of action studies in laboratory animals can establish the key events and their relationships required for the various adverse outcomes as a result of PCDD/Fs and DL-PCBs exposure.

---

<sup>4</sup> A body of scientific evidence is a collection of pieces of evidence that is identified and evaluated to answer one or a set of scientific question(s).

<sup>5</sup> The evaluation of the confidence in the body of evidence will be carried out considering the conceptual framework developed by the NTP Office of Health Assessment and Translation (OHAT), without necessarily following the same structured methodology (NTP, 2015)

### A.1.3. Method to address the exposure assessment sub-questions

#### A.1.3.1. Human dietary exposure assessment

To address sub-question 11 on the levels of PCDD/Fs and DL-PCBs in food in Europe, a structured approach will be followed to collect and evaluate the evidence (structured approach E). The available occurrence data on PCDD/Fs and DL-PCBs in food will be extracted from the EFSA database by the EFSA DATA Unit. Occurrence data are collected through the continuous annual call for data issued by EFSA requesting data on a list of prioritised chemical contaminants<sup>6</sup>. National food authorities and also research institutions, academia, food business operators and other stakeholders are invited to submit data occurrence by the 1st of October of each year. The data submission to EFSA must follow the requirements of the EFSA Guidance on Standard Sample Description for Food and Feed (EFSA, 2010c); occurrence data will be managed following the EFSA standard operating procedures (SOPs) on 'Data collection and validation' and on 'Data analysis and reporting'.

For this risk assessment all occurrence data received before the end of April 2016 will be considered. As the analytical methodology to measure PCDD/Fs and DL-PCBs as well as the reporting of congeners has been improved in recent years, only the occurrence data collected from 2010 onwards will be included in the final dataset.

TEFs established in 2005 (van den Berg et al., 2006) will be applied to the occurrence data (food and feed).

In addition and to guarantee an appropriate quality of the food data used in the exposure assessment, the initial dataset will be evaluated carefully before being used to estimate dietary exposure. Among the steps that will be followed, it is worth mentioning the re-codification of samples under FoodEx classification, the application of the substitution method to left-censored data, the exclusion of suspect samples or those samples for which incomplete information (e.g. absence of particular congeners) is given and the grouping at the appropriate FoodEx level, among others. These steps will be carried out by the EFSA DATA Unit in close collaboration with the members of the Working Group.

Sub-question 13 on the consumption levels of foods among the target European population will be addressed by a structured approach to collect and analyse the evidence available (structured approach F). The EFSA Comprehensive European Food Consumption Database (Comprehensive Database) will be the source of the food consumption information. This database provides a compilation of existing national information on food consumption at individual level. It was first built in 2010 (EFSA, 2011b; Huybrechts et al., 2011; Merten et al., 2011) and then updated in 2015<sup>7</sup>. Details on how the Comprehensive Database is used are published in the Guidance of EFSA (EFSA, 2011b).

The Comprehensive Database contains data of dietary surveys from different European countries. Consumption data are available for 'Infants' (< 12 months old), 'Toddlers' (≥ 12 months to < 36 months old), 'Other children' (≥ 36 months to < 10 years old), 'Adolescents' (≥ 10 years to < 18 years old), 'Adults' (≥ 18 years to < 65 years old), the 'Elderly' (≥ 65 years to < 75 years old) and the 'Very elderly' (≥ 75 years old). As indicated by the EFSA Working Group on Food Consumption and Exposure (EFSA, 2011c), dietary surveys with only one day per subject will only be considered for acute exposure as they are not adequate to assess repeated exposure. Similarly, subjects who participated only one day in the dietary studies, when the protocol prescribed more reporting days per individual, will also be excluded for the chronic exposure assessment.

To estimate the human dietary exposure (sub-question 14), both occurrence and consumption data will be codified and classified according to the FoodEx classification system (EFSA, 2011d). FoodEx is a food classification system developed by the former EFSA DCM Unit in 2009 with the objective of simplifying the linkage between occurrence and food consumption data when assessing the exposure to hazardous substances. It contains 20 main food groups (first level), which are further divided into subgroups having 140 items at the second level, 1,261 items at the third level and reaching about

<sup>6</sup> <http://www.efsa.europa.eu/en/data/call/datex101217>

<sup>7</sup> <http://www.efsa.europa.eu/en/datexfoodcdb/datexfooddb>



1,800 end-points (food names or generic food names) at the fourth level. The EFSA DATA Unit will verify the correct application of FoodEx classification to the data before dietary exposure is estimated.

The CONTAM Panel considered that only chronic dietary exposure to PCDD/Fs and DL-PCBs was to be assessed for the general population. Two scenarios will be used to estimate chronic dietary exposure. Scenario A will only use food samples that reported the 29 target congeners (the seventeen 2,3,7,8-substituted PCDD/Fs and the 12 DL-PCBs) while in the scenario B dietary exposure will be estimated considering only the food samples that reported the 17 target PCDD/Fs congeners.

For calculating chronic dietary exposure to PCDD/Fs and DL-PCBs, food consumption and body weight data at the individual level will be accessed in the Comprehensive Database. Food occurrence data and consumption data will be linked at the least possible aggregated FoodEx level. In addition, the different food commodities will be grouped within each food category to better explain their contribution to the total dietary exposure to PCDD/Fs and DL-PCBs. Exposure estimates will be calculated per dietary survey and age class. The mean and the high (95th percentile) chronic dietary exposures will be calculated by combining PCDD/Fs and DL-PCBs mean occurrence values for food samples collected in different countries (pooled European occurrence data) with the average daily consumption for each food at individual level in each dietary survey. When occurrence data on the target PCDD/Fs and DL-PCBs are reported on fat content basis, consumption levels will be converted into amount of fat before dietary exposure is estimated. When the fat content of consumed foods is not available for specific eating occasions, an average value will be derived according to the different levels of hierarchy of the FoodEx1 catalogue from the available consumption data.

The estimates will be performed by the EFSA data Unit. All analyses will be run using the SAS Statistical Software (SAS enterprise guide 5.1).

Sub-question 12 on the effects of processing in food on the levels of the target compounds will be addressed narratively. A literature search will be carried out to identify reviews as well as other peer-reviewed single studies published in the open literature that will be screened and evaluated by relevant domain experts from the Working Group. For details of the preliminary search strategy see Table 27. When possible, it will be complemented with the data submitted to EFSA, in case this information is available.

Sub-question 15 on the concentrations of PCDD/Fs and DL-PCBs in human tissues (e.g. blood, breast milk, adipose tissue, placenta) in the target European population will be addressed narratively. Also in this case, a literature search will be carried out to identify reviews as well as peer-reviewed studies published in the open literature that will be screened and evaluated by relevant domain experts from the Working Group. For details of the preliminary search strategy see Table 28.

**Table 27.** Preliminary search strings for Narrative approach D (sub-question 12, effects of processing)

|                             |                                                                                                                                                                                      |
|-----------------------------|--------------------------------------------------------------------------------------------------------------------------------------------------------------------------------------|
| <b>Database</b>             | Web Of Science™                                                                                                                                                                      |
| <b>Preliminary keywords</b> | Dioxins, Tetrachlorodibenzodioxin, TCDD, Dioxin-like, TEQ, Coplanar, Polychlorinated biphenyls, PCBs <b>AND</b> Processing, cooking procedures, cooking technique, cooking practices |

**Table 28.** Preliminary search strings for Narrative approach E (sub-question 15, levels in human tissues)

|                                  |                                                                                                                                                        |
|----------------------------------|--------------------------------------------------------------------------------------------------------------------------------------------------------|
| <b>Database</b>                  | Web Of Science™                                                                                                                                        |
| <b>Preliminary search string</b> | Dioxins, Tetrachlorodibenzodioxin, Dioxin-like, TEQ, Coplanar, Polychlorinated biphenyls, PCBs <b>AND</b> Blood, breast milk, adipose tissue, placenta |

### A.1.3.2. Farm and companion animal dietary exposure assessment

To address sub-question 21 on the levels of PCDD/Fs and DL-PCBs in feed in Europe, the same approach as to address sub-question 11 related to food will be used (structured approach E). As done for the occurrence data in food (see above), available occurrence data on PCDD/Fs and DL-PCBs in feed will be extracted from the EFSA database by the EFSA DATA Unit. The feed occurrence data are

also collected through the continuous annual call for data issued by EFSA requesting data on a list of prioritised chemical contaminants<sup>16</sup>. As for food, WHO<sub>2005</sub>-TEFs will be applied to the feed occurrence data. The initial dataset will be evaluated carefully by the EFSA DATA Unit before being used to estimate dietary exposure.

Sub-question 22 on the consumption levels of feeds among the farm and companion animals, will be addressed narratively. In contrast to the situation for the human food consumption data (see structured approach F) there is no comprehensive database on what or how much feed livestock in the EU consume. Therefore, general estimates of feeds consumed for each of the main categories of farm livestock and companion animals will be used. These will be based on published guidelines on nutrition and feeding (e.g. AFRC, 1993; Carabano and Piquer, 1998; NRC, 2007a,b; Leeson and Summers, 2008; EFSA, 2009c; OECD, 2009; McDonald et al., 2011), expert knowledge of production systems in Europe, and data on EU manufacture of compound feeds (FEFAC, 2009). As a result, the composition of diets for each of the major farm livestock species used for the exposure assessment are estimates of the CONTAM Panel, but are in agreement with common practice.

To estimate farm and companion animal dietary exposure (sub-question 23) the feed will be classified based on the catalogue of feed materials as last specified in the corresponding Commission Regulation creating the Catalogue of feed materials. If possible, compound feedingstuffs will be classified in groups based on the species/production categories for which the feed is intended. This step will be performed by the EFSA DATA Unit.

As for the human risk assessment, the CONTAM Panel considered that only chronic dietary exposure to PCDD/Fs and DL-PCBs was to be assessed. It will be estimated by combining the mean occurrence data with the species specific feed mean consumption data. Two scenarios will be used to estimate chronic dietary exposure, one using food samples that reported the 29 target congeners (the seventeen 2,3,7,8-substituted PCDD/Fs and the 12 DL-PCBs) and another considering only the food samples that reported the 17 target PCDD/Fs congeners. These estimates will be performed by the Working Group.

#### **A.1.4. Method to address the uncertainties in the risk assessment**

The evaluation of the inherent uncertainties in the risk assessment on PCDD/Fs and DL-PCBs will be performed following the guidance of the Opinion of the Scientific Committee related to Uncertainties in Dietary Exposure Assessment (EFSA, 2006). Furthermore, the report on 'Characterizing and Communicating Uncertainty in Exposure Assessment' (WHO/IPCS, 2008) will be considered. According to the guidance provided by the EFSA opinion (2006) the following sources of uncertainties are to be considered: assessment objectives, exposure scenario, exposure model, and model input (parameters).

#### **A.1.5. Approach for reaching risks characterisation conclusions**

The general principles of the risk characterisation for chemicals in food as described by WHO/IPCS (2009) will be applied as well as the different EFSA guidance documents relevant to this step of the risk assessment (see Section A.1.1.5 above). For the animal risk characterisation, the same principles will be applied.

#### **A.1.6. Plans for updating the literature searches and dealing with newly available evidence**

The literature searches performed for the structured approaches will be repeated approximately 7 and 4 months before the planned date of adoption of the opinion. The scientific papers retrieved by these additional searches will be screened for relevance, applying the same inclusion/exclusion criteria as detailed in this Annex. These tasks will be performed by the members of the Working Group and EFSA staff.

Relevant studies will be reviewed narratively by the Working Group experts and in case of controversial issues are identified (e.g. conflicting conclusions) these will be discussed in the Working Group which will prepare a proposal on how to deal with the issues. The controversial issues and the

proposed solution will be brought to the attention of the CONTAM Panel which will take the final decision.

### A.1.7. Human resource, software and timeline for performing the risk assessment

Tasks for performing the different steps in the risk assessment are shown in Table 29.

**Table 29.** Allocation of task for performing the assessment

| What                                                                                                                                                                  | Who                                           | Software <sup>(a)</sup>             | Timeline (planned) |
|-----------------------------------------------------------------------------------------------------------------------------------------------------------------------|-----------------------------------------------|-------------------------------------|--------------------|
| <b>Hazard identification and characterisation<br/>(human and farm/companion animal risk assessment)</b>                                                               |                                               |                                     |                    |
| <b>Structured approach A</b><br>Search process, study selection for relevance, and data extraction for sub-questions 1 and 8 (human studies)                          | External contractor                           | EndNote<br>DistillerSR <sup>®</sup> | June<br>2016       |
| <b>Structured approach A</b><br>Appraisal of relevant studies for sub-questions 1 and 8 (human studies)                                                               | Members of the<br>Working Group               | DistillerSR <sup>®</sup>            | November<br>2016   |
| <b>Structured approach B</b><br>Search process, study selection for relevance, and data extraction for sub-questions 3 and 9 (experimental animal studies)            | External contractor                           | EndNote<br>DistillerSR <sup>®</sup> | June<br>2016       |
| <b>Structured approach B</b><br>Appraisal of relevant studies for sub-questions 3 and 9 (experimental animal studies)                                                 | Members of the<br>Working Group               | DistillerSR <sup>®</sup>            | November<br>2016   |
| <b>Structured approach C</b><br>Search process and narrative review and analysis of data for sub-question 5 (ADME humans)                                             | Working Group and<br>EFSA (BIOCONTAM<br>Unit) | EndNote<br>DistillerSR <sup>®</sup> | July<br>2016       |
| <b>Structured approach D</b><br>Search process and narrative review and analysis of data for sub-question 6 (ADME experimental animals)                               | Working Group and<br>EFSA (BIOCONTAM<br>Unit) | EndNote<br>DistillerSR <sup>®</sup> | July<br>2016       |
| <b>Structured approach G</b><br>Search process, study selection for relevance, and data extraction for sub-questions 16 and 17 (farm and companion animal studies)    | Working Group and<br>EFSA (BIOCONTAM<br>Unit) | EndNote<br>DistillerSR <sup>®</sup> | June<br>2016       |
| <b>Structured approach G</b><br>Appraisal of relevant studies for sub-questions 16 and 17 (farm and companion animals)                                                | Members of the<br>Working Group               | DistillerSR <sup>®</sup>            | November<br>2016   |
| <b>Structured approach H</b><br>Search process and narrative review and analysis of data for sub-question 18 and 19 (ADME and transfer in farm and companion animals) | Working Group and<br>EFSA (BIOCONTAM<br>Unit) | EndNote<br>DistillerSR <sup>®</sup> | July<br>2016       |
| Referee in case of doubt and divergences                                                                                                                              | Working Group<br>members                      | DistillerSR <sup>®</sup>            | n.a.               |
| <b>Narrative approach</b> - Review and analysis of data for sub-question 2 (HI experimental animals at all doses)                                                     | Working Group and<br>EFSA (BIOCONTAM<br>Unit) | EndNote                             | June 2016          |
| <b>Narrative approach</b> - Review and analysis of data for sub-question 4 (genotoxicity)                                                                             | Members of the<br>Working Group               | EndNote                             | June 2016          |
| <b>Narrative approach</b> - Review and analysis of data for sub-question 10 (Mode of action)                                                                          | Members of the<br>Working Group               | EndNote                             | June 2016          |
| <b>Dietary exposure assessment<br/>(human and farm/companion animal risk assessment)</b>                                                                              |                                               |                                     |                    |
| <b>Structured approach E</b><br>Collection and analysis of the occurrence data on food and feed submitted to EFSA for sub-questions 11 and 21                         | EFSA<br>(DATA Unit)                           | SAS                                 | September<br>2016  |
| <b>Structured approach F</b><br>Collection and analysis of the food consumption data available at EFSA for sub-question 13                                            | EFSA<br>(DATA Unit)                           | SAS                                 | September<br>2016  |
| <b>Narrative approach</b> - Review and analysis of data for sub-                                                                                                      | Working Group and                             | EndNote                             | November           |

| What                                                                                                                       | Who                                               | Software <sup>(a)</sup>  | Timeline (planned) |
|----------------------------------------------------------------------------------------------------------------------------|---------------------------------------------------|--------------------------|--------------------|
| question 12 (effects of food processing)                                                                                   | EFSA (BIOCONTAM Unit)                             |                          | 2016               |
| <b>Narrative approach</b> - Review and analysis of data for sub-question 15 (concentrations in human samples)              | Working Group and EFSA (BIOCONTAM Unit)           | EndNote                  | July 2016          |
| <b>Narrative approach</b> - Collection and analysis of the feed consumption data for sub-question 22.                      | Working Group and EFSA (BIOCONTAM Unit)           | SAS                      | September 2016     |
| Literature check for background data on occurrence and dietary exposure to dioxins and DL-PCBs published in the literature | EFSA (BIOCONTAM Unit)                             | EndNote                  | December 2016      |
| Estimation of the human dietary intake and scenarios for sub-question 14                                                   | EFSA (DATA Unit)                                  | SAS                      | December 2016      |
| Estimation of the farm and companion animal dietary intake and scenarios for sub-question 23.                              | Working Group and EFSA (DATA and BIOCONTAM Units) | xls                      | December 2016      |
| <b>Plans for updating the literature searches</b>                                                                          |                                                   |                          |                    |
| Update of the searches                                                                                                     | Working Group and EFSA (BIOCONTAM Unit)           | EndNote                  |                    |
| Select studies for relevance                                                                                               | Working Group members                             | DistillerSR <sup>®</sup> |                    |
| Narrative review of relevant additional studies                                                                            | Working Group members                             | /                        |                    |
| <b>Finalisation of the draft opinion: May 2017<sup>8</sup></b>                                                             |                                                   |                          |                    |

(a): Reference management software or web-based review software or data management software.

### A.1.8. History of the amendments

The following amendments to the protocol were applied due to time and resources constraints:

**Section A.1.2.2.4:** In July 2016, it was decided that the data extraction of the relevant farm and companion animal studies would be done using a simplified data extraction form based on Table 12. It was also decided that the risk of bias appraisal for the studies in farm and companion animals would be done in a qualitative way.

**Section A.1.2.2.5:** In May 2017, it was decided that the risk of bias appraisal of the studies in humans would be done in duplicate for some endpoints only, including the critical endpoint 'effects on reproduction' (both male and female). Similarly for the experimental animals, only some studies were appraised in duplicate. Whether a study has been appraised in duplicate or by one expert is indicated where appropriate. Appraisals were performed in Distiller or in word files.

**Section A.1.2.2:** In November 2017 it was decided that Structured approach C and D to address sub-questions 5 and 6 related to the toxicokinetics of the target compounds in humans and experimental animals, respectively, would be addressed narratively. A literature search would be carried out to identify previous assessment and studies relevant to inform these sub-questions published in the open literature. The studies would be screened and evaluated by relevant domain experts from the Working Group. This task would be performed by EFSA/Working Group members.

**Section A.1.2.2.3:** In February 2018, it was decided to exclude animal studies with exposure to PCDD/Fs and DL-PCBs other than TCDD, or with exposure to mixtures. Body burdens estimated from some of these studies would be associated with higher uncertainty, as TEFs are weighted factors based on a range of relative potencies from various studies and endpoints, and determined to discrete points on a log scale.

**Section A.1.3.1:** For this risk assessment it was decided to extend the period to include occurrence data from April 2016 to December 2016.

<sup>8</sup> An extension until 30 June 2018 was agreed with EC.

**Section A.1.6:** In October 2017, it was agreed that only one update of the literature search would be performed. This literature update would target the section on observations in humans and studies in experimental animals.

## ANNEX A.2. DATA AND METHODOLOGIES – SEARCH STRINGS

### A.2.1. Supporting information for the risk assessment

The references resulting from the literature search presented in the tables below were imported to EndNote<sup>9</sup>.

**Table 30.** Search strings used to retrieve studies to inform the section on occurrence data in food and feed published in the open literature and previously reported exposure assessments

| Database        | Web of Science™ |                                                                                                                                                                                                                                                                                                                                                                                                           |
|-----------------|-----------------|-----------------------------------------------------------------------------------------------------------------------------------------------------------------------------------------------------------------------------------------------------------------------------------------------------------------------------------------------------------------------------------------------------------|
| Search strategy | #1              | TS = (*dioxin OR tetrachlorodibenzo* OR TCDD OR dioxin-like OR TEQ OR coplanar OR polychlorinated biphenyl OR PCBs OR PCDD* OR PCDF*)                                                                                                                                                                                                                                                                     |
|                 | #2              | <b>A:</b> TS = ("food occur"* OR "food" OR "foodstuffs" OR "food-stuffs" OR "food occurrence")<br><b>B:</b> TS=(feed occur"* OR "feed" OR "feedstuffs" OR "feed-stuffs" OR "feed occurrence" OR "grains" OR "barley" OR "wheat" OR "maize" OR "oat" OR "rice" OR "rye" OR "spelt" OR "compound feed" OR "seeds" OR "complete feed")                                                                       |
|                 | #3              | (#1) AND (#2)                                                                                                                                                                                                                                                                                                                                                                                             |
|                 | #4              | (#3) AND Refined by: [excluding] Databases: (KJD OR CSCD) AND LANGUAGES: (ENGLISH) Timespan: 1998-2016                                                                                                                                                                                                                                                                                                    |
|                 | #5              | #4 AND Refined by COUNTRIES/TERRITORIES: ( LITHUANIA OR ROMANIA OR BULGARIA OR ITALY OR SPAIN OR GERMANY OR CROATIA OR NORWAY OR BELGIUM OR SWEDEN OR NETHERLANDS OR FRANCE OR ENGLAND OR HUNGARY OR DENMARK OR POLAND OR FINLAND OR ESTONIA OR CZECH REPUBLIC OR WALES OR SLOVENIA OR UK OR GREECE OR UNITED KINGDOM OR SLOVAKIA OR LATVIA OR PORTUGAL OR AUSTRIA OR LUXEMBOURG OR SCOTLAND OR IRELAND ) |
|                 | #6              | (#5) AND Refined by: DOCUMENT TYPES: (REVIEW)                                                                                                                                                                                                                                                                                                                                                             |

Number of Hits: **A:** 40, **B:** 22.

Date of search: 29.05.2016

**Table 31.** Search string used to retrieve studies ion of studies relevant to inform the section on effects on processing in the levels of PCDD/Fs and DL-PCBs in food and feed

| Database        | Web of Science™ |                                                                                                                                        |
|-----------------|-----------------|----------------------------------------------------------------------------------------------------------------------------------------|
| Search Strategy | #1              | TS = (*dioxin OR tetrachlorodibenzo* OR TCDD OR dioxin-like OR TEQ OR coplanar OR polychlorinated biphenyl OR PCBs OR PCDD* OR PCDF*)  |
|                 | #2              | TS=("food processing" OR cooking OR "cooking procedures" OR "cooking technique" OR "cooking practices" OR frying OR smoking OR drying) |
|                 | #3              | (#1) AND (#2)                                                                                                                          |
|                 | #4              | #3 AND TS=(food OR feed)                                                                                                               |
|                 | #5              | #4 - Refined by:<br>[excluding] Databases: (Korean JD OR Chinese SCD OR Russian SCI)<br>LANGUAGES: (ENGLISH)<br>Timespan=1950-2016     |

Number of Hits: 1,068

Date of search: 13.04.2016

<sup>9</sup> EndNote X5, Thomson Reuters. Available online: <http://endnote.com/>

**Table 32.** Search string used for the identification of studies relevant to inform the section on levels in humans

| Database                   | Web of Science™ |                                                                                                                                                                |
|----------------------------|-----------------|----------------------------------------------------------------------------------------------------------------------------------------------------------------|
| <b>Search Strategy</b>     | #1              | TS = (*dioxin OR tetrachlorodibenzo* OR TCDD OR dioxin-like OR TEQ OR coplanar OR polychlorinated biphenyl OR PCBs OR PCDD* OR PCDF*)                          |
|                            | #2              | TS=(blood OR "breast milk" OR "human milk" OR "placenta" OR "Adipose Tissue" OR "Human adipose tissue" OR "Human fatty tissue" OR liver)                       |
|                            | #3              | (#1) AND (#2)                                                                                                                                                  |
|                            | #4              | (#3) AND TS=(human)                                                                                                                                            |
|                            | #5              | #4 - Refined by:<br>[excluding] Databases: (Korean JD OR Chinese SCD OR Russian SCI)<br>DOCUMENT TYPES: (REVIEW)<br>LANGUAGES: (ENGLISH)<br>Timespan=1950-2016 |
| Number of Hits: 589        |                 |                                                                                                                                                                |
| Date of search: 13.04.2016 |                 |                                                                                                                                                                |

### A.2.2. Adverse effects in farm and companion animals

The search strings used for the identification of studies relevant to inform the adverse effects of PCDD/Fs and DL-PCBs in farm and companion animals (sub-questions 16 and 17) are shown in Tables 33 to 37 for the different animal species (ruminants, pigs, poultry, fish and horses).

The studies were transferred from the databases to EndNote where a first check for duplicates was carried out. The references were then transferred to the web-based systematic review software Distiller<sup>SR</sup>. A second duplicate check was done, followed by a two-step selection for relevance by two independent reviewers according to the eligibility criteria set in Annex A.1. The outcome of this selection is discussed in Section 3.1.5 of the scientific opinion.

**Table 33.** Search strings used to retrieve studies on the adverse effects in ruminants

| Database               | Web of Science™ |                                                                                                                                                                                                                                                                                                                                                                                                                                                                                                                                                                                                                  |
|------------------------|-----------------|------------------------------------------------------------------------------------------------------------------------------------------------------------------------------------------------------------------------------------------------------------------------------------------------------------------------------------------------------------------------------------------------------------------------------------------------------------------------------------------------------------------------------------------------------------------------------------------------------------------|
| <b>Search strategy</b> | #1              | TS=(TCDD OR dioxins OR *dioxin OR dioxin-like* OR coplanar OR PCB* OR polychlorinated biphenyl* OR PCDD* OR PCDF*)                                                                                                                                                                                                                                                                                                                                                                                                                                                                                               |
|                        | #2              | TS=(ruminant OR ruminants OR cattle OR cow OR cows OR bovine OR sheep OR goat OR goats OR buffalo OR buffaloes)                                                                                                                                                                                                                                                                                                                                                                                                                                                                                                  |
|                        | #3              | TS=(*toxic* OR adverse OR effect OR effects OR "adverse effects" OR fertility OR disease* OR diseases)                                                                                                                                                                                                                                                                                                                                                                                                                                                                                                           |
|                        | #4              | (#1) AND (#2) AND (#3)                                                                                                                                                                                                                                                                                                                                                                                                                                                                                                                                                                                           |
|                        | #5              | #4 NOT TS=(rat OR rats OR mice OR mouse OR monkey OR monkeys OR "guinea pig" OR guinea-pig OR guineapig OR "mini pig" OR minipig OR rabbit OR rabbits OR hamster OR hamsters OR dog OR dogs OR cat OR cats OR mink OR minks)                                                                                                                                                                                                                                                                                                                                                                                     |
|                        | #6              | #5 NOT TI=(zebrafish OR medaka OR "human milk" OR birds OR "in vitro" OR transfer OR "carry over" OR carry-over OR carryover)                                                                                                                                                                                                                                                                                                                                                                                                                                                                                    |
|                        | #7              | #6 AND PY=(1950-18/04/2016)                                                                                                                                                                                                                                                                                                                                                                                                                                                                                                                                                                                      |
|                        | #8              | #7 Refine by LANGUAGE=(English)                                                                                                                                                                                                                                                                                                                                                                                                                                                                                                                                                                                  |
|                        | #9              | #8 Refine by DOCUMENT TYPES: (article OR review)                                                                                                                                                                                                                                                                                                                                                                                                                                                                                                                                                                 |
|                        | #10             | #9 Refine by DATABASE: exclude Chinese and Korean and Russian (if appear)                                                                                                                                                                                                                                                                                                                                                                                                                                                                                                                                        |
| <b>Database</b>        | <b>PubMed</b>   |                                                                                                                                                                                                                                                                                                                                                                                                                                                                                                                                                                                                                  |
| <b>Search Strategy</b> | #1              | "dioxins"[MeSH Terms] OR "Tetrachlorodibenzodioxin"[Mesh]) OR ("polychlorinated biphenyls"[MeSH Terms]                                                                                                                                                                                                                                                                                                                                                                                                                                                                                                           |
|                        | #2              | ((("ruminants"[MeSH Terms] OR "ruminants"[All Fields] OR "ruminant"[All Fields]) OR ("cattle"[MeSH Terms] OR "cattle"[All Fields]) OR ("cattle"[MeSH Terms] OR "cattle"[All Fields] OR "cow"[All Fields]) OR ("cattle"[MeSH Terms] OR "cattle"[All Fields] OR "bovine"[All Fields]) OR ("sheep, domestic"[MeSH Terms] OR ("sheep"[All Fields] AND "domestic"[All Fields]) OR "domestic sheep"[All Fields] OR "sheep"[All Fields] OR "sheep"[MeSH Terms]) OR ("goats"[MeSH Terms] OR "goats"[All Fields] OR "goat"[All Fields]) OR ("buffaloes"[MeSH Terms] OR "buffaloes"[All Fields] OR "buffalo"[All Fields])) |



|    |                                                                        |
|----|------------------------------------------------------------------------|
| #3 | "adverse effects" [Subheading]                                         |
| #4 | #1 AND #2 AND #3                                                       |
| #5 | #4 NOT (mice[Title] OR rat[Title] OR rats[Title] OR "in vitro"[Title]) |
| #6 | #5 AND ("1950"[Date - Publication] : "3000"[Date - Publication])       |
| #7 | #6 AND "english"[Language]                                             |

HITS combined WOS + pubMED = 880 (w/o duplicate in EndNote)

Date of search: 19.04.2016

**Table 34.** Search strings used to retrieve studies on the adverse effects in **pigs**

| Database        | Web of Science™ |                                                                                                                                                                                                                              |
|-----------------|-----------------|------------------------------------------------------------------------------------------------------------------------------------------------------------------------------------------------------------------------------|
| Search strategy | #1              | TS=(TCDD OR dioxins OR *dioxin OR dioxin-like* OR coplanar OR PCB* OR polychlorinated biphenyl* OR PCDD* OR PCDF*)                                                                                                           |
|                 |                 | TS=(swine OR pig OR pigs)                                                                                                                                                                                                    |
|                 | #3              | TS=(*toxic* OR adverse OR effect OR effects OR "adverse effects" OR fertility OR disease* OR diseases)                                                                                                                       |
|                 | #4              | (#1) AND (#2) AND (#3)                                                                                                                                                                                                       |
|                 | #5              | #4 NOT TS=(rat OR rats OR mice OR mouse OR monkey OR monkeys OR "guinea pig" OR guinea-pig OR guineapig OR "mini pig" OR minipig OR rabbit OR rabbits OR hamster OR hamsters OR dog OR dogs OR cat OR cats OR mink OR minks) |
|                 | #6              | #5 NOT TI=(zebrafish OR medaka OR "human milk" OR birds OR "in vitro" OR transfer OR "carry over" OR carry-over OR carryover OR pigment OR pigments OR pigeon)                                                               |
|                 | #7              | #6 AND PY=(1950-date of the search)                                                                                                                                                                                          |
|                 | #8              | #7 Refine by LANGUAGE=(English)                                                                                                                                                                                              |
|                 | #9              | #8 Refine by DOCUMENT TYPES: (article OR review OR correction)                                                                                                                                                               |
|                 | #10             | #9 Refine by DATABASE: exclude Chinese and Korean an Russian (if appear)                                                                                                                                                     |
| Database        | PubMed          |                                                                                                                                                                                                                              |
| Search Strategy | #1              | "dioxins"[MeSH Terms] OR "Tetrachlorodibenzodioxin"[Mesh]) OR ("polychlorinated biphenyls"[MeSH Terms]                                                                                                                       |
|                 | #2              | "swine"[MeSH Terms] OR "swine"[All Fields] OR "pig"[All Fields] OR "pigs"[All Fields]                                                                                                                                        |
|                 | #3              | "adverse effects" [Subheading]                                                                                                                                                                                               |
|                 | #4              | #1 AND #2 AND #3                                                                                                                                                                                                             |
|                 | #5              | NOT (mice[Title] OR rat[Title] OR rats[Title] OR "in vitro"[Title])                                                                                                                                                          |
|                 | #6              | #6 AND ("1950"[Date - Publication] : "3000"[Date - Publication])                                                                                                                                                             |
|                 | #7              | #5 AND "english"[Language]                                                                                                                                                                                                   |

HITS combined WOS + pubMED = 367 (w/o duplicate in EndNote)

Date of search:19.04.2016

**Table 35.** Search strings used to retrieve studies on the adverse effects in **poultry**

| Database        | Web of Science™ |                                                                                                                                                                                                                              |
|-----------------|-----------------|------------------------------------------------------------------------------------------------------------------------------------------------------------------------------------------------------------------------------|
| Search strategy | #1              | TS=(TCDD OR dioxins OR *dioxin OR dioxin-like* OR coplanar OR PCB* OR polychlorinated biphenyl* OR PCDD* OR PCDF*)                                                                                                           |
|                 | #2              | TS=(poultry OR chicken OR chickens OR turkey OR turkeys OR duck OR ducks OR quail OR quails OR goose OR geese)                                                                                                               |
|                 | #3              | TS=(*toxic* OR adverse OR effect OR effects OR "adverse effects" OR fertility OR disease* OR diseases)                                                                                                                       |
|                 | #4              | (#1) AND (#2) AND (#3)                                                                                                                                                                                                       |
|                 | #5              | #4 NOT TS=(rat OR rats OR mice OR mouse OR monkey OR monkeys OR "guinea pig" OR guinea-pig OR guineapig OR "mini pig" OR minipig OR rabbit OR rabbits OR hamster OR hamsters OR dog OR dogs OR cat OR cats OR mink OR minks) |
|                 | #6              | #5 NOT TI=( zebrafish OR medaka OR "human milk" OR birds OR "in vitro" OR transfer OR "carry over" OR carry-over OR carryover)                                                                                               |

|                                                               |               |                                                                                                                                                                                                                                              |
|---------------------------------------------------------------|---------------|----------------------------------------------------------------------------------------------------------------------------------------------------------------------------------------------------------------------------------------------|
|                                                               | #7            | #6 AND PY=(1950-date of the search)                                                                                                                                                                                                          |
|                                                               | #8            | #7 Refine by LANGUAGE=(English)                                                                                                                                                                                                              |
|                                                               | #9            | #8 Refine by DOCUMENT TYPES: (article OR review OR correction)                                                                                                                                                                               |
|                                                               | #10           | #9 Refine by DATABASE: exclude Chinese and Korean an Russian (if appear)                                                                                                                                                                     |
| <b>Database</b>                                               | <b>PubMed</b> |                                                                                                                                                                                                                                              |
| <b>Search Strategy</b>                                        | #1            | "dioxins"[MeSH Terms] OR "Tetrachlorodibenzodioxin"[Mesh]) OR ("polychlorinated biphenyls"[MeSH Terms]                                                                                                                                       |
|                                                               | #2            | ((("Chickens"[Mesh]) OR "chicken"[All Fields] OR "Poultry"[Mesh]) OR "poultry"[All Fields] OR "Ducks"[Mesh]) OR "ducks"[All Fields] OR "Quail"[Mesh]) OR "quails"[All Fields] OR "Coturnix"[Mesh]) OR "Geese"[Mesh] OR "geese"[All Fields])) |
|                                                               | #3            | "adverse effects" [Subheading]                                                                                                                                                                                                               |
|                                                               | #4            | #1 AND #2 AND #3                                                                                                                                                                                                                             |
|                                                               | #5            | NOT (mice[Title] OR rat[Title] OR rats[Title] OR "in vitro"[Title])                                                                                                                                                                          |
|                                                               | #6            | #6 AND ("1950"[Date - Publication] : "3000"[Date - Publication])                                                                                                                                                                             |
|                                                               | #7            | #5 AND "english"[Language]                                                                                                                                                                                                                   |
| HITS combined WOS + pubMED = 1,015 (w/o duplicate in EndNote) |               |                                                                                                                                                                                                                                              |
| Date of search:19.04.2016                                     |               |                                                                                                                                                                                                                                              |

**Table 36.** Search strings used to retrieve studies on the adverse effects in **fish**

|                                                               |                        |                                                                                                                                                                                                                                                                                                                                                                                                                                                                                                                                                                                                                                     |
|---------------------------------------------------------------|------------------------|-------------------------------------------------------------------------------------------------------------------------------------------------------------------------------------------------------------------------------------------------------------------------------------------------------------------------------------------------------------------------------------------------------------------------------------------------------------------------------------------------------------------------------------------------------------------------------------------------------------------------------------|
| <b>Database</b>                                               | <b>Web of Science™</b> |                                                                                                                                                                                                                                                                                                                                                                                                                                                                                                                                                                                                                                     |
| <b>Search strategy</b>                                        | #1                     | TS=(TCDD OR dioxins OR *dioxin OR dioxin-like* OR coplanar OR PCB* OR polychlorinated biphenyl* OR PCDD* OR PCDF*)                                                                                                                                                                                                                                                                                                                                                                                                                                                                                                                  |
|                                                               | #2                     | TS=(trout OR trouts OR salmon OR "sea bream" OR seabream OR "sea bass" OR seabass OR turbot OR carp OR sturgeon OR eel OR eels OR tilapia OR cod OR halibut OR cobia OR "milk fish" OR tuna OR "tuna fish" OR tunafish)                                                                                                                                                                                                                                                                                                                                                                                                             |
|                                                               | #3                     | TS=(*toxic* OR adverse OR effect OR effects OR "adverse effects" OR fertility OR disease* OR diseases)                                                                                                                                                                                                                                                                                                                                                                                                                                                                                                                              |
|                                                               | #4                     | (#1) AND (#2) AND (#3)                                                                                                                                                                                                                                                                                                                                                                                                                                                                                                                                                                                                              |
|                                                               | #5                     | #4 NOT TS=(rat OR rats OR mice OR mouse OR monkey OR monkeys OR "guinea pig" OR guinea-pig OR guineapig OR "mini pig" OR minipig OR rabbit OR rabbits OR hamster OR hamsters OR dog OR dogs OR cat OR cats OR mink OR minks)                                                                                                                                                                                                                                                                                                                                                                                                        |
|                                                               | #6                     | #5 NOT TS=(zebrafish OR "zebra fish" OR medaka OR "Danio rerio" OR "Oryzias latipes" OR mummichog* OR killifish OR "Fundulus heteroclitus" OR fundulus OR minnows OR "Pimephales promelas" OR "human milk" OR birds OR "in vitro" OR transfer OR "carry over" OR carry-over OR carryover)                                                                                                                                                                                                                                                                                                                                           |
|                                                               | #7                     | #6 NOT TI=(survey OR monitoring OR trend)                                                                                                                                                                                                                                                                                                                                                                                                                                                                                                                                                                                           |
|                                                               | #8                     | #7 AND PY=(1950-date of the search)                                                                                                                                                                                                                                                                                                                                                                                                                                                                                                                                                                                                 |
|                                                               | #9                     | #8 Refine by LANGUAGE=(English)                                                                                                                                                                                                                                                                                                                                                                                                                                                                                                                                                                                                     |
|                                                               | #10                    | #9 Refine by DOCUMENT TYPES: (article OR review OR correction) (exclude the remaining)                                                                                                                                                                                                                                                                                                                                                                                                                                                                                                                                              |
|                                                               | #11                    | #10 Refine by DATABASE: exclude Chinese and Korean an Russian (if appear)                                                                                                                                                                                                                                                                                                                                                                                                                                                                                                                                                           |
| <b>Database</b>                                               | <b>PubMed</b>          |                                                                                                                                                                                                                                                                                                                                                                                                                                                                                                                                                                                                                                     |
| <b>Search Strategy</b>                                        | #1                     | "dioxins"[MeSH Terms] OR "Tetrachlorodibenzodioxin"[Mesh]) OR ("polychlorinated biphenyls"[MeSH Terms]                                                                                                                                                                                                                                                                                                                                                                                                                                                                                                                              |
|                                                               | #2                     | ("trout"[MeSH Terms] OR "trout"[All Fields]) OR ("salmon"[MeSH Terms] OR "salmon"[All Fields] OR "salmo salar"[MeSH Terms] OR ("salmo"[All Fields] AND "salar"[All Fields]) OR "salmo salar"[All Fields]) OR "sea bream"[All Fields] OR "sea bass"[All Fields] OR "turbot"[All Fields] OR ("carps"[MeSH Terms] OR "carps"[All Fields] OR "carp"[All Fields]) OR sturgeon\$[All Fields] OR eel\$[All Fields] OR ("tilapia"[MeSH Terms] OR "tilapia"[All Fields]) OR cod\$[All Fields] OR ("flounder"[MeSH Terms] OR "flounder"[All Fields] OR "halibut"[All Fields]) OR cobia[All Fields] OR "milk fish"[All Fields] OR "Tuna"[Mesh] |
|                                                               | #3                     | "adverse effects" [Subheading]                                                                                                                                                                                                                                                                                                                                                                                                                                                                                                                                                                                                      |
|                                                               | #4                     | #1 AND #2 AND #3                                                                                                                                                                                                                                                                                                                                                                                                                                                                                                                                                                                                                    |
|                                                               | #5                     | NOT (mice[Title] OR rat[Title] OR rats[Title] OR "in vitro"[Title] OR zebrafish[Title] OR "zebra fish" [Title] OR medaka[Title] OR "Danio rerio" [Title] OR "Oryzias latipes" [Title] OR mummichog\$[Title] OR killifish[Title] OR "Fundulus heteroclitus" [Title] OR fundulus[Title] OR minnow\$[Title] OR "Pimephales promelas"[Title]) NOT (survey[Title] OR monitoring[Title] OR trend[Title])                                                                                                                                                                                                                                  |
|                                                               | #6                     | #6 AND ("1950"[Date - Publication] : "3000"[Date - Publication])                                                                                                                                                                                                                                                                                                                                                                                                                                                                                                                                                                    |
|                                                               | #7                     | #5 AND "english"[Language]                                                                                                                                                                                                                                                                                                                                                                                                                                                                                                                                                                                                          |
| HITS combined WOS + pubMED = 1,860 (w/o duplicate in EndNote) |                        |                                                                                                                                                                                                                                                                                                                                                                                                                                                                                                                                                                                                                                     |

Date of search: 02.05.2016

**Table 37.** Search strings used to retrieve studies on the adverse effects in **horses**

| Database        | Web of Science™ |                                                                                                                                                                                                                              |
|-----------------|-----------------|------------------------------------------------------------------------------------------------------------------------------------------------------------------------------------------------------------------------------|
| Search strategy | #1              | TS=(TCDD OR dioxins OR *dioxin OR dioxin-like* OR coplanar OR PCB* OR polychlorinated biphenyl* OR PCDD* OR PCDF*)                                                                                                           |
|                 |                 | TS=(horse OR horses)                                                                                                                                                                                                         |
|                 | #3              | TS=(*toxic* OR adverse OR effect OR effects OR "adverse effects" OR fertility OR disease* OR diseases)                                                                                                                       |
|                 | #4              | (#1) AND (#2) AND (#3)                                                                                                                                                                                                       |
|                 | #5              | #4 NOT TS=(rat OR rats OR mice OR mouse OR monkey OR monkeys OR "guinea pig" OR guinea-pig OR guineapig OR "mini pig" OR minipig OR rabbit OR rabbits OR hamster OR hamsters OR dog OR dogs OR cat OR cats OR mink OR minks) |
|                 | #6              | #5 NOT TI=(zebrafish OR medaka OR "human milk" OR birds OR "in vitro" OR transfer OR "carry over" OR carry-over OR carryover)                                                                                                |
|                 | #7              | #6 AND PY=(1950-date of the search)                                                                                                                                                                                          |
|                 | #8              | #7 <i>Refine by</i> LANGUAGE=(English)                                                                                                                                                                                       |
|                 | #9              | #8 <i>Refine by</i> DOCUMENT TYPES: (article OR review OR correction)                                                                                                                                                        |
|                 | #10             | #9 <i>Refine by</i> DATABASE: exclude Chinese and Korean an Russian (if appear)                                                                                                                                              |
| Database        | PubMed          |                                                                                                                                                                                                                              |
| Search Strategy | #1              | "dioxins"[MeSH Terms] OR "Tetrachlorodibenzodioxin"[Mesh]) OR ("polychlorinated biphenyls"[MeSH Terms]                                                                                                                       |
|                 | #2              | "Horses"[Mesh] OR "horse"[All Fields] OR "horses"[All Fields]                                                                                                                                                                |
|                 | #3              | "adverse effects"[Subheading]                                                                                                                                                                                                |
|                 | #4              | #1 AND #2 AND #3                                                                                                                                                                                                             |
|                 | #5              | #4 AND ("1950"[Date - Publication] : "3000"[Date - Publication])                                                                                                                                                             |
|                 | #6              | #5 AND "english"[Language]                                                                                                                                                                                                   |

HITS combined WOS + pubMED = 60 (w/o duplicate in EndNote)

Date of search: 19.04.2016

### A.2.3. Toxicokinetics and transfer

The search strings used for the identification of studies relevant to inform the section on toxicokinetics in farm animals and transfer of PCDD/Fs and DL-PCBs from food producing animals (sub-questions 18 and 19) are shown in Table 38 for the different animal species (ruminants, pigs, poultry, fish and horses).

The studies were transferred from the databases to EndNote where a first check for duplicates was carried out. The references were then transferred to the web-based systematic review software DistillerSR. A second duplicate check was done, followed by a two-step selection for relevance by two independent reviewers according to the eligibility criteria set in Annex A.1 to this scientific opinion. The outcome of this selection is discussed in Section 3.1.1 of the scientific opinion.

**Table 38.** Search strings used to retrieved studies on the **toxicokinetics and transfer in livestock**

| Database                                                                                                                                                                                                                                                                                                                                                                                                                                                                                                                                                                                  | Web of Science™                                                                                                                                                                                                                                                                                                                                                                                                                                                                                                                     |
|-------------------------------------------------------------------------------------------------------------------------------------------------------------------------------------------------------------------------------------------------------------------------------------------------------------------------------------------------------------------------------------------------------------------------------------------------------------------------------------------------------------------------------------------------------------------------------------------|-------------------------------------------------------------------------------------------------------------------------------------------------------------------------------------------------------------------------------------------------------------------------------------------------------------------------------------------------------------------------------------------------------------------------------------------------------------------------------------------------------------------------------------|
| <b>Search strategy</b>                                                                                                                                                                                                                                                                                                                                                                                                                                                                                                                                                                    | <b>#1</b> TS=(TCDD OR dioxins OR *dioxin OR dioxin-like* OR coplanar OR PCB* OR polychlorinated biphenyl* OR PCDD* OR PCDF*)                                                                                                                                                                                                                                                                                                                                                                                                        |
|                                                                                                                                                                                                                                                                                                                                                                                                                                                                                                                                                                                           | <b>#2</b> TS=(administration OR absorption OR distribution OR "tissue distribution" OR bioavailab* OR metaboli* OR biotransform* OR activat* OR half-li* OR excret* OR clearance OR eliminat* OR bioconcentrat* OR *kinetic* OR PBPK OR PBK OR transfer OR carry-over OR carryover OR "carry over")                                                                                                                                                                                                                                 |
|                                                                                                                                                                                                                                                                                                                                                                                                                                                                                                                                                                                           | <b>#3</b><br><b>A</b> - TS=(ruminant* OR cattle OR cow* OR bovine* OR sheep* OR goat* OR buffal*)<br><b>B</b> - TS=(swine OR pig*)<br><b>C</b> - TS=(poultry OR chicken* OR turkey* OR duck* OR quail* OR goose*)<br><b>D</b> - TS=(trout OR trouts OR salmon OR "sea bream" OR seabream OR "sea bass" OR seabass OR turbot OR carp OR sturgeon OR eel OR eels OR tilapia OR cod OR halibut OR cobia OR "milk fish" OR tuna OR tunafish OR "tuna fish")<br><b>E</b> - TS=(horse*)<br><b>F</b> - TS=(ostrich OR ostriches)           |
|                                                                                                                                                                                                                                                                                                                                                                                                                                                                                                                                                                                           | <b>#4</b> (#1) AND (#2) AND (#3)                                                                                                                                                                                                                                                                                                                                                                                                                                                                                                    |
|                                                                                                                                                                                                                                                                                                                                                                                                                                                                                                                                                                                           | <b>#5</b> #4 NOT TS=(rat* OR mice* OR mouse OR monkey* OR "guinea pig" OR "mini pig" OR rabbit* OR hamster* OR dog* OR cat* OR mink*)<br>For <b>B</b> -PIGS: NOT=TS=(*pigment*)<br>For <b>D</b> -FISH: NOT TS=(zebrafish OR "zebra fish" OR "Danio rerio" OR medaka OR "Oryzias latipes" OR mummichog* OR killifish OR "Fundulus heteroclitus" OR fundulus OR minnows OR "Pimephales promelas" OR "model fish") NOT TI=(survey OR monitoring OR trend)                                                                              |
|                                                                                                                                                                                                                                                                                                                                                                                                                                                                                                                                                                                           | <b>#6</b> #5 AND PY=(1998-date of the search)                                                                                                                                                                                                                                                                                                                                                                                                                                                                                       |
|                                                                                                                                                                                                                                                                                                                                                                                                                                                                                                                                                                                           | <b>#7</b> #6 Refine by LANGUAGE=(English)                                                                                                                                                                                                                                                                                                                                                                                                                                                                                           |
|                                                                                                                                                                                                                                                                                                                                                                                                                                                                                                                                                                                           | <b>#8</b> #7 Refine by DOCUMENT TYPES: (article OR review)                                                                                                                                                                                                                                                                                                                                                                                                                                                                          |
|                                                                                                                                                                                                                                                                                                                                                                                                                                                                                                                                                                                           | <b>#9</b> #8 Refine by DATABASE                                                                                                                                                                                                                                                                                                                                                                                                                                                                                                     |
| Database                                                                                                                                                                                                                                                                                                                                                                                                                                                                                                                                                                                  | PubMed                                                                                                                                                                                                                                                                                                                                                                                                                                                                                                                              |
| <b>Search Strategy</b>                                                                                                                                                                                                                                                                                                                                                                                                                                                                                                                                                                    | <b>#1</b> All fields (TCDD OR dioxins OR *dioxin OR dioxin-like* OR coplanar OR PCB* OR polychlorinated biphenyl* OR PCDD* OR PCDF*)                                                                                                                                                                                                                                                                                                                                                                                                |
|                                                                                                                                                                                                                                                                                                                                                                                                                                                                                                                                                                                           | <b>#2</b> All fields (administration OR absorption OR distribution OR "tissue distribution" OR bioavailab* OR metaboli* OR biotransform* OR activat* OR half-li* OR excret* OR clearance OR eliminat* OR bioconcentrat* OR *kinetic* OR PBPK OR PBK OR transfer OR carry-over OR carryover OR "carry over")                                                                                                                                                                                                                         |
|                                                                                                                                                                                                                                                                                                                                                                                                                                                                                                                                                                                           | <b>#3</b><br><b>A</b> - (ruminant* OR cattle OR cow* OR bovine* OR sheep* OR goat* OR buffal*)<br><b>B</b> - (swine OR pig*)<br><b>C</b> - (poultry OR chicken* OR turkey* OR duck* OR quail* OR goose*)<br><b>D</b> - (trout OR trouts OR salmon OR "sea bream" OR seabream OR "sea bass" OR seabass OR turbot OR carp OR sturgeon OR eel OR eels OR tilapia OR cod OR halibut OR cobia OR "milk fish" OR tuna OR tunafish OR "tuna fish")<br><b>E</b> - (horse*)<br><b>F</b> - (ostrich OR ostriches OR "Struthioniformes"[Mesh]) |
|                                                                                                                                                                                                                                                                                                                                                                                                                                                                                                                                                                                           | <b>#4</b> #1 AND #2 AND #3                                                                                                                                                                                                                                                                                                                                                                                                                                                                                                          |
|                                                                                                                                                                                                                                                                                                                                                                                                                                                                                                                                                                                           | <b>#5</b> #4 NOT (rat* OR mice* OR mouse OR monkey* OR guinea pig OR mini pig OR rabbit* OR hamster* OR dog* OR cat* OR mink*)<br>For <b>D</b> - FISH: NOT (zebrafish OR "zebra fish" OR "Danio rerio" OR medaka OR "Oryzias latipes" OR mummichog* OR killifish OR "Fundulus heteroclitus" OR fundulus OR minnows OR "Pimephales promelas" OR "model fish") NOT tittle (survey OR monitoring OR trend)                                                                                                                             |
|                                                                                                                                                                                                                                                                                                                                                                                                                                                                                                                                                                                           | <b>#6</b> #5 AND ("1998"[Date - Publication] : "3000"[Date - Publication])                                                                                                                                                                                                                                                                                                                                                                                                                                                          |
|                                                                                                                                                                                                                                                                                                                                                                                                                                                                                                                                                                                           | <b>#7</b> #6 AND "english"[Language]                                                                                                                                                                                                                                                                                                                                                                                                                                                                                                |
| <p>A – Ruminants WOS+PUBMED = 336 hits (w/o duplicates in EndNote). Date of search:10.05.2016<br/> B – Pigs. WOS+PUBMED = 178 hits (w/o duplicates in EndNote). Date of search:07.06.2016<br/> C – Poultry. WOS+PUBMED = 440 hits (w/o duplicates in EndNote). Date of search: 03.06.2016<br/> D – Fish. WOS+PUBMED = 1,073 hits (w/o duplicates in EndNote). Date of search: 19.06.2016<br/> E – Horse. WOS+PUBMED = 48 hits (w/o duplicates in EndNote). Date of search: 12.04.2016<br/> F – Ostriches. WOS+PUBMED = 2 hits (w/o duplicates in EndNote). Date of search: 28.04.2016</p> |                                                                                                                                                                                                                                                                                                                                                                                                                                                                                                                                     |

## ANNEX A.3. FEED INTAKES AND DIET COMPOSITION FOR LIVESTOCK AND COMPANION ANIMALS

This Annex A.3 gives details of the feed intakes, live weights and diet compositions for different livestock, fish and companion animals which were used as the basis to estimate exposures. These are based on published guidelines on nutrition and feeding (e.g. Carabano and Piquer, 1998; NRC 2000, 2007a,b; Ewing, 2002; Leeson and Summers, 2008; OECD, 2009; McDonald et al., 2011; EBLEX, 2008, 2012; EFSA FEEDAP Panel, 2012) and information provided by European feed manufacturers. They are therefore estimates of the EFSA Scientific Panel on Contaminants in the Food Chain (CONTAM Panel), but agree with common practice.

In Table 39 the concentrations of PCDD/Fs and DL-PCBs in feeds used to estimate exposure are presented.

**Table 39.** Levels of the sum of PCDD/Fs and DL-PCBs (29 congeners) and the sum of PCDD/Fs (17 congeners) (pg WHO<sub>2005</sub>-TEQ/kg DM) in species-specific compound/complementary feeds and feed materials used to estimate exposure by farmed livestock and companion animals

|                                     | Sum of PCDD/Fs and DL-PCBs<br>(29 congeners) |      |       |       | Sum of PCDD/Fs<br>(17 congeners) |      |      |      |
|-------------------------------------|----------------------------------------------|------|-------|-------|----------------------------------|------|------|------|
|                                     | Mean                                         |      | P95   |       | Mean                             |      | P95  |      |
|                                     | LB                                           | UB   | LB    | UB    | LB                               | UB   | LB   | UB   |
| <b>Compound/complementary feeds</b> |                                              |      |       |       |                                  |      |      |      |
| Horses                              |                                              |      | 95.4  | 96.6  |                                  |      | 36.3 | 50.4 |
| Pig: growing/fattening              |                                              |      | 143   | 168   |                                  |      | 60.9 | 66.2 |
| Pig: breeding                       |                                              |      | 186   | 217   |                                  |      | 186  | 190  |
| Poultry (starter diet)              | 17.3                                         | 31.7 | 32.6  | 68.2  | 6.8                              | 19.5 | 20.5 | 40.5 |
| Fattening chickens                  |                                              |      | 297   | 323   |                                  |      | 297  | 299  |
| Salmonids                           | 609                                          | 660  | 1,345 | 1,348 | 144                              | 194  | 411  | 476  |
| Rabbits                             |                                              |      | 94.0  | 107   |                                  |      | 58.6 | 76.2 |
| Dogs                                |                                              |      | 488   | 501   |                                  |      | 462  | 467  |
| <b>Feed materials</b>               |                                              |      |       |       |                                  |      |      |      |
| Wheat                               | 37.5                                         | 60.2 | 239   | 304   | 10.2                             | 31.0 | 81.9 | 173  |
| Barley                              | 16.9                                         | 28.5 | 45.5  | 54.0  | 4.5                              | 14.9 | 14.5 | 32.6 |
| Maize (corn)                        | 37.3                                         | 54.2 | 174   | 189   | 27.9                             | 42.5 | 99.9 | 116  |
| Soybean meal                        | 21.1                                         | 33.2 | 204   | 205   | 13.2                             | 24.8 | 171  | 171  |
| Rapeseed meal                       | 12.1                                         | 27.4 | 30.2  | 52.6  | 4.8                              | 19.7 | 10.9 | 48.5 |
| Sunflower meal                      | 20.1                                         | 46.7 | 99.6  | 145   | 4.7                              | 28.4 | 25.7 | 71.4 |
| Fishmeal                            | 676                                          | 743  | 1,762 | 1,763 | 239                              | 304  | 719  | 756  |
| Minerals                            | 40.2                                         | 149  | 180   | 248   | 28.4                             | 131  | 23.1 | 150  |
| <b>Forages</b>                      |                                              |      |       |       |                                  |      |      |      |
| Forages <sup>(a)</sup>              | 128                                          | 149  | 372   | 372   | 65.9                             | 85.9 | 231  | 240  |
| Maize silage                        | 58.1                                         | 77.3 | 139   | 142   | 32.4                             | 50.1 | 105  | 112  |

(a): Forages and roughages and products thereof.

### A.3.1. Feed intakes

#### A.3.1.1. Cattle, sheep, goats and horses

##### Dairy cows

The amounts of feed given to lactating dairy cows vary according to the quantity and quality of forages and other feeds available, the weight of the cow, its physiological status (e.g. pregnancy) and its milk yield. In this Opinion, it is assumed that non-forage feeds are fed at the rate of 0.3 kg/kg of milk produced (Nix, 2010). Exposures to the sum of PCDD/Fs and DL-PCBs (29 congeners) and to the sum of PCDD/Fs (17 congeners) have been estimated for a 650-kg dairy cow, with a milk yield of 40 kg per day. Assumptions on the amounts of forages and non-forage feeds for dairy cows fed on grass and maize silage are given in Table 40.

## Beef cattle

There are a wide variety of beef production and husbandry systems in Europe. They may be categorised broadly as forage-based or cereal-based systems, although combinations of these systems are commonly found. In this Opinion, four feeding systems are considered, in which the forages are: (1) grass hay, (2) maize silage, and (3) cereal straw with, in each case, appropriate supplementation with non-forage feed materials. A fourth system, commonly known as 'cereal beef', is also considered. For exposure estimates, live weights of 300 or 400 kg, and feed intakes of between 6.6 and 10 kg dry matter (DM) per day have been assumed, depending on the feeding regime, based on guidelines published by EBLEX (2008, 2012), and details are given in Table 40.

## Sheep and goats

Many breeds and systems of management have been developed for sheep and goats to suit the land, climate and husbandry conditions in the EU. As for other ruminants, forages may be the only feeds used after weaning (NRC, 2007a). Common exceptions to this are pregnant and lactating animals, whose feed is usually supplemented with non-forage feeds or commercial compound (complementary) feeds (AFRC, 1993; NRC, 2007a).

In this Opinion, exposure estimates have been made for lactating sheep and goats. The CONTAM Panel has used a daily dry matter intake of 2.8 kg for an 80-kg lactating sheep feeding twin lambs to estimate the exposures. For lactating goats, the CONTAM Panel has used daily dry matter intakes of 3.4 kg for a 60-kg goat for milking (4 kg milk/day); for fattening goats, a body weight of 40 kg and feed intake of 1.5 kg DM/day has been assumed, of which 60% is forage.

## Horses

Horses are non-ruminant herbivores. They generally consume 2–3.5 % of their body weight in feed (DM) each day, of which a minimum of 50% should be as forage (pasture grass or hay) (NRC, 2007b). Assumed intakes are given in Table 40.

**Table 40.** Live weights, growth rate/productivity, dry matter intake for cattle, sheep, goats and horses, and the proportions of the diet as non-forage

|                                             | Live weight (kg) | Growth rate or productivity | Dry matter intake (kg/day) | % of diet as non-forage feed | Reference            |
|---------------------------------------------|------------------|-----------------------------|----------------------------|------------------------------|----------------------|
| Dairy cows, lactating <sup>(a)</sup>        | 650              | 40 kg milk/day              | 20.7                       | 40                           | OECD (2009)          |
| Fattening cattle: beef <sup>(b)</sup>       | 400              | 1 kg/day                    | 9.6                        | 15                           | AFRC (1993)          |
| Fattening cattle: maize silage-based ration | 300              | 1.4 kg/day                  | 6.6                        | 25                           | Browne et al. (2004) |
| Fattening cattle: cereal beef               | 400              | 1.4 kg/day                  | 10.0                       | 85                           | EBLEX (2012)         |
| Sheep: lactating                            | 80               | Feeding twin lambs          | 2.8                        | 50                           | OECD (2009)          |
| Goats: lactating                            | 60               | 6 kg milk/day               | 3.4                        | 65                           | NRC (2007a)          |
| Goats: fattening                            | 40               |                             | 1.5                        | 40                           |                      |
| Horses                                      | 450              | Moderate activity           | 9.0                        | 50                           | NRC (2007b)          |

(a): Months 2–3 of lactation. The same levels of feed intake and productivity have been applied for both grass and maize silage-based diets

(b): Housed castrate cattle, medium maturing breed.

### A.3.1.2. Non-ruminant animals

#### Pigs

Although there is a considerable range of pig production systems in Europe, exposure estimates have been made for piglets (pig starter), finishing pigs and lactating sows (using feed intakes proposed by EFSA FEEDAP Panel, 2012). Details are given in Table 41.



## Poultry

The CONTAM Panel applied the live weights and feed intakes reported for fattening chickens (broilers), laying hens and fattening turkeys proposed by EFSA (2009) and for fattening ducks by Leeson and Summers (2008) (Table 41).

### Farmed fish (salmonids and carp)

Commercially reared species include Atlantic salmon, rainbow trout, sea bass, sea bream, cod, halibut, tuna, eel and turbot. In this Scientific Opinion exposures to PCDD/Fs and DL-PCBs have been made for farmed salmon and carp. Details of the body weights and feed intakes used are given in Table 41.

**Table 41.** Live weights and feed intake for pigs, poultry (EFSA FEEDAP Panel, 2012), ducks (Leeson and Summers, 2008) and fish

|                                  | Live weight<br>(kg) | Feed intake<br>(kg dry matter/day) | Reference                 |
|----------------------------------|---------------------|------------------------------------|---------------------------|
| Pigs: starter                    | 20                  | 1.0                                | EFSA (2012)               |
| Pigs: finishing                  | 100                 | 3.0                                | EFSA (2012)               |
| Pigs: lactating sows             | 200                 | 6.0                                | EFSA (2012)               |
| Poultry: broilers <sup>(a)</sup> | 2                   | 0.12                               | EFSA (2012)               |
| Poultry: laying hens             | 2                   | 0.12                               | EFSA (2012)               |
| Turkeys: fattening turkeys       | 12                  | 0.40                               | EFSA (2009)               |
| Ducks: fattening ducks           | 3                   | 0.14                               | Leeson and Summers (2008) |
| Salmonids                        | 2                   | 0.04                               | EFSA (2012)               |
| Carp                             | 1                   | 0.02                               | Schultz et al. (2012)     |

(a): Fattening chickens.

## Rabbits

Feed intakes of 65–80 g/kg bw per day have been reported (Carabano and Piquer, 1998). For the exposure estimates, the CONTAM Panel have assumed a live weight of 2 kg, and a daily feed intake of 75 g/kg bw (derived from Carabano and Piquer, 1998).

### Farmed mink

For estimating exposure, the CONTAM Panel have assumed a live weight of 2.07 kg for a male mink at pelting, and with a feed intake of 227 g fresh weight per day (75 g DM) (NRC, 1982).

### Companion animals: dogs and cats

The amount of food consumed is largely a function of the mature weight of the animal, level of activity, physiological status (e.g. pregnancy or lactation) and the energy content of the diet. In this Scientific Opinion, the CONTAM Panel assumed body weights (kg) and feed intakes (g DM/day) for dogs and cats of 25/360 and 4/60, respectively (derived from NRC, 2006).

## A.3.2. Diet composition

Many livestock in the European countries are fed proprietary commercial compound feeds. Where sufficient data have been provided on species-specific compound feeds, estimates of exposure have been made using these data (given in Table 39) together with estimated intakes given in this Annex A.3.1. Where data on proprietary compound feeds were not available, or were available but in insufficient numbers, estimates of exposure have been made using dietary inclusion rates of feed materials given in this section. Levels of PCDD/Fs and DL-PCBs in species-specific compound/complementary feeds or feed materials used to estimate exposure are given in Table 39.

### A.3.2.1. Cattle, sheep, goats and horses

For most ruminants and horses, forages (either fresh or conserved as silage or hay) are important ingredients in their diet, but they are normally supplemented with non-forage feeds such as cereals, cereal by-products, oilseed meals and by-products of human food production. These may be fed



either as individual feeds, mixtures of feed materials, or as species-specific complementary feeds in the form of compound feeds. In some situations, however, forages may represent the total diet.

The data submitted to EFSA were predominantly in the general category of 'Forages and roughages and products thereof' (n = 57), and these were used to estimate exposure for lactating dairy cows, lactating sheep, and lactating and fattening goats. Data were also provided on levels of PCDD/Fs and DL-PCBs in 'Maize silage' (n = 18), and these have been used to estimate mean LB and UB exposure in dairy and beef systems where maize silage is the main forage. Insufficient data were available for grass hay or cereal straws, and therefore no estimates of exposure have been possible for those livestock for which these are the predominant forages.

In the absence of data on the levels of PCDD/Fs and DL-PCBs (29 congeners) or of PCDD/Fs (17 congeners) in species-specific compound feeds for dairy cows, beef cattle, lactating sheep, and milking or fattening goats, example rations (Table 42) have been used, together with the sum of PCDD/Fs and DL-PCBs (29 congeners) or the sum of PCDD/Fs (17 congeners) in the individual ingredients to estimate exposure.

Maize silage is widely used in diets for lactating dairy cows and beef cattle. AFSSA (2009) have provided example intakes of dairy cows fed maize silage supplemented with maize grain and soybean meal, while example diets of beef cattle on maize silage diets are taken from EBLEX (2012), and these are given in Table 43.

For lactating sheep and goats, and for fattening goats, levels of PCDD/Fs and DL-PCBs in species-specific compound feed data were not available and therefore example diets (Table 42) and levels of the sum of PCDD/Fs and DL-PCBs (29 congeners) or the sum of PCDD/Fs (17 congeners) in individual feeds (Table 39) have been used, together with levels in 'Forages and roughages and products thereof' to estimate exposure.

Horses are non-ruminant herbivores, and consequently their diet should contain a minimum of 50% forages. In this Opinion, the CONTAM Panel have used data available on levels of PCDD/Fs and DL-PCBs in complementary feeds for horses (Table 39) to estimate exposure.

**Table 42.** Assumed diet compositions (%) for lactating sheep, goats and cows, and fattening goats

| Non-forage feed materials                  | Lactating dairy cows | Lactating sheep | Lactating goats | Fattening goats |
|--------------------------------------------|----------------------|-----------------|-----------------|-----------------|
| % of non-forage feeds in the diet          | 40                   | 50              | 75              | 40              |
| <b>Composition of the non-forage feeds</b> |                      |                 |                 |                 |
| Wheat (%)                                  | 15                   | 14              | ni              | ni              |
| Barley (%)                                 | 20                   | 18              | 25              | 20              |
| Oats (%)                                   | ni                   | ni              | 35              | 40              |
| Soybean meal (%)                           | 5                    | 5               | 10              | 10              |
| Rapeseed meal (%)                          | 20                   | 10              | 10              | 10              |
| Sunflower meal (%)                         | ni                   | 5               | ni              | ni              |
| Beans (%) <sup>(a)</sup>                   | 5                    | 10              | ni              | ni              |
| Maize gluten feed (%)                      | 10                   | ni              | ni              | ni              |
| Wheat feed (%) <sup>(a)</sup>              | 10                   | 15              | 10              | 10              |
| Oat feed (%) <sup>(a)</sup>                | ni                   | ni              | ni              | ni              |
| Sugar beet pulp (%) <sup>(a)</sup>         | 7                    | 14              | 1               | 1               |
| Molasses (%) <sup>(a)</sup>                | 3                    | 4               | 4               | 4               |
| Vegetable oils (%) <sup>(a)</sup>          | 3                    | 5               | 5               | 5               |
| Minerals, vitamins etc (%) <sup>(a)</sup>  | 2                    | ni              | ni              | ni              |

ni: not included in the diet formulations.

(a): No data for the sum of PCDD/Fs and DL-PCBs (29 congeners) and to the sum of PCDD/Fs (17 congeners) were available, and therefore no contribution from these feeds has been assumed.

**Table 43.** Assumed diet compositions and feed intake of lactating dairy cows (40 litres/day) and fattening beef cattle fed diets based on different forages

| Animal species                                 | Forage | Maize grain | Soybean meal | Barley grain | Rapeseed meal | Reference    |
|------------------------------------------------|--------|-------------|--------------|--------------|---------------|--------------|
| Lactating dairy cows: maize silage-based diet  | 15.0   | 9.5         | 2.8          | ni           | ni            | AFSSA (2009) |
| Fattening beef cattle: maize silage-based diet | 4.9    | ni          | ni           | ni           | 1.5           | EBLEX (2012) |

ni: not included in the diet formulations.

#### A.3.2.2. Pigs and poultry

Sufficient data for species-specific compound feeds for pigs, and for most categories of poultry (fattening chickens, ducks and turkeys, and for laying hens), were provided (see Table 39) together with assumed live weights and feed intakes (see Table 41) were used to estimate exposure to the sum of PCDD/Fs and DL-PCBs (29 congeners) and to the sum of PCDD/Fs (17 congeners).

#### A.3.2.3. Rabbits

Rabbits are usually fed a pelleted diet (in the form of complete feedingstuffs) consisting of dried forages, cereals and vegetable proteins supplemented with minerals, vitamins and trace elements. Lebas and Renouf (2009) reviewed diet formulations used in experimental studies: in 58 diets, cereals and cereal by-products (mostly wheat bran) accounted for up to 40% of all ingredients. In these studies, maize was a major cereal grain and was included in more than one-third of all diets. In northern Europe, however, maize may be replaced by barley and wheat. In this opinion, the feed ingredients used in a typical French commercial rabbit compound, as provided by T. Gidenne, (Personal communication, 2011) have been used, details of which are given in Table 44.

#### A.3.2.4. Farmed fish (salmonids and carp)

In this Opinion, exposure to PCDD/Fs and DL-PCBs by salmonids has been derived from data provided to EFSA on levels in complementary or complete feeds for fish. Although the species to which these were intended to be fed has not been defined, the data have been used for salmonids, since this accounts for the majority of fish food manufactured in the EU.

In contrast to salmonids, common carp (*Cyprinus carpio*) have a greater ability to utilise carbohydrates. As a result, diets for this species typically contain more cereals and vegetable proteins. The CONTAM Panel have used the ingredients of commercial compound feeds for carp reported by Schultz et al. (2012) to estimate exposure to PCDD/Fs and DL-PCBs in Table 44.

#### A.3.2.5. Farmed mink

Mink are carnivorous animals and are fed high protein diets consisting mainly of meat and meat by-products. Commercially manufactured mink feed consists largely of fish and land animal by-products, with lesser amounts of cereals and cereal by-products, and supplemented with mineral/vitamin premixtures. Mink are fed diets high in protein, although their nutritional requirements vary according to the animal's physiological stage (e.g. gestating, lactating and growing) and climatic conditions, particularly temperature. The proportions of cereal grains, their products and by-products used in estimating the exposure are given in Table 44.

#### A.3.2.6. Companion animals (dogs and cats)

Most small companion animals derive their nutritional needs from processed food, and in 2010 EU annual sales of pet food products was approximately 8.3 million tonnes.<sup>10</sup> Although a wide range of ingredients is used in commercial diets, most dog and cat diets contain at least some animal protein. Other ingredients include cereals (predominantly wheat, rice or maize), cereal by-products, vegetable

<sup>10</sup> Available online: [www.Fediaf.org](http://www.Fediaf.org)

proteins and by-products of human food production. The ingredients will vary depending both on the availability of feed materials and the nutrient requirements of the animals.

The European Pet Food Industry Federation (FEDIAF) has provided information on typical inclusion levels of cereals, cereal by-products and other feed materials in dry cat food<sup>11</sup>. In the absence of sufficient data on species-specific manufactured complete feedingstuffs, the CONTAM Panel has used example diets based on information provided by FEDIAF<sup>11</sup> (details given in Table 44).

**Table 44.** Assumed diet composition (%) for farmed fish (salmonids and carp), farmed rabbits, farmed mink and companion animals (cats and dogs)

| Inclusion levels in the diet                 | Farmed fish |      | Farmed rabbits | Farmed mink <sup>(b)</sup> | Companion animals |      |
|----------------------------------------------|-------------|------|----------------|----------------------------|-------------------|------|
|                                              | Salmon      | Carp |                |                            | Cats              | Dogs |
| Compound feed (%)                            | 100         | 0    | 0              | 0                          | 0                 | 100  |
| Wheat (%)                                    |             | 24   | ni             | 6                          | 10                |      |
| Barley (%)                                   |             | ni   | ni             | 1                          | ni                |      |
| Maize (%)                                    |             | 10   | 17.6           | 6                          | 5                 |      |
| Oats (%)                                     |             | ni   | ni             | ni                         | 1                 |      |
| Soybean meal (%)                             |             | 32.4 | ni             | ni                         | 8                 |      |
| Rapeseed meal (%)                            |             | 12.5 | ni             | ni                         | ni                |      |
| Maize gluten meal (%)                        |             | ni   | ni             | ni                         | 17                |      |
| Sunflower meal (%) <sup>(a)</sup>            |             | ni   | 20.0           | ni                         | ni                |      |
| Lucerne meal (%) <sup>(a)</sup>              |             | ni   | 19.1           | ni                         | ni                |      |
| Beans (%) <sup>(a)</sup>                     |             | ni   | 10.4           | ni                         | 1                 |      |
| Peas (%)                                     |             | 7.5  | ni             | ni                         | ni                |      |
| Wheat feed (%)                               |             | ni   | 18.3           | ni                         | 12                |      |
| Sugar beet pulp (%)                          |             | ni   | 11.9           | ni                         | ni                |      |
| Fishmeal (%)                                 |             | 6.7  | ni             | ni                         | 6                 |      |
| Meat meal (%) <sup>(a)</sup>                 |             | ni   | ni             | 40                         | 38                |      |
| Molasses (%) <sup>(a)</sup>                  |             | ni   | ni             | ni                         | ni                |      |
| Fish and vegetable oils (%) <sup>(a)</sup>   |             | 3.6  | ni             | 8                          | ni                |      |
| Other feeds (unspecified) (%) <sup>(a)</sup> |             | 1.3  | ni             | ni                         | ni                |      |
| Minerals, vitamins, etc (%) <sup>(a)</sup>   |             | 2.0  | 2.7            | 3                          | 2.0               |      |

ni: not included in the diet formulations.

(a): No data sum of PCDD/Fs and DL-PCBs (29 congeners) or the sum of PCDD/Fs (17 congeners) were available, and therefore no contribution from these feeds has been assumed

(b): Diet formulation based on data provided by the Finnish Fur Breeders Association in 2015 and translated from Finnish to English, [www.profur.fi](http://www.profur.fi)

<sup>11</sup> The European Pet Food Industry Federation (FEDIAF), Personal communication by email, May 2016

## ANNEX A.4. STUDIES ON THE TRANSFER OF PCDD/FS AND DL-PCBS IN FOOD PRODUCING ANIMALS

### A.4.1. Studies in ruminants

**Table 45.** Studies retrieved in the literature search and selection for relevance to inform about toxicokinetics and transfer in **cows and buffaloes**

| Reference                                                                                                                                                                    | Species    | Compounds                                                                    | Comments                                                                                                                                   |
|------------------------------------------------------------------------------------------------------------------------------------------------------------------------------|------------|------------------------------------------------------------------------------|--------------------------------------------------------------------------------------------------------------------------------------------|
| <b>Thomas et al. (1999).</b> Metabolism and body-burden of PCBs in lactating dairy cows.                                                                                     | Dairy Cows | PCB-105, PCB-118                                                             | PCB-105 and -118. Background exposure. <i>Study not useful for transfer.</i>                                                               |
| <b>Fries et al. (1999).</b> A congener specific evaluation of transfer of PCDDs and PCDFs to milk of cows following ingestion of pentachlorophenol-treated wood.             | Dairy Cows | Mixtures of PCDD/Fs                                                          |                                                                                                                                            |
| <b>Malisch (2000).</b> Increase of the PCDD/F-contamination of milk, butter and meat samples by use of contaminated citrus pulp.                                             | Dairy Cows | Mixture of PCDD/Fs                                                           | Follow-up of citrus pulp incident                                                                                                          |
| <b>Feil et al. (2000).</b> Chlorinated dibenzo- <i>p</i> -dioxin and dibenzofuran concentrations in beef animals from a feeding study.                                       | Beef Cows  | Mixtures PCDD/Fs, DL-PCBs                                                    | No data in tissues. Also PCP contamination stable. study useful but only for Tetra- and Penta-CDD/Fs congeners                             |
| <b>Thorpe et al. (2001).</b> Concentration changes for 5 PCDD/F congeners after administration in beef cattle.                                                               | Beef Cows  | TCDD, 1,2,3,7,8-PeCDD, 1,2,3,6,7,8-HxCDD, 2,3,4,7,8-PeCDF, 1,2,3,4,7,8-HxCDF | Study useful for some congeners                                                                                                            |
| <b>Fries et al. (2002).</b> Complete mass balance of dietary PCDDs and PCDFs in dairy cattle and characterization of the apparent synthesis of hepta- and octachlorodioxins. | Dairy Cows | Mixtures of PCDD/Fs                                                          |                                                                                                                                            |
| <b>Huwe et al. (2004).</b> Levels of PCDDs and PCDFs in cattle raised at agricultural research facilities across the USA and the influence of PCP-treated wood.              | Beef Cows  | Mixtures PCDD/Fs                                                             | Only levels in meat from different farms. No intake studied. <i>Study not useful for transfer.</i>                                         |
| <b>Hirako et al. (2005).</b> Comparison of the concentrations of PCDDs, PCDFs, and DL-PCBs in maternal and fetal blood, amniotic and allantoic fluids in cattle.             | Beef Cows  | Mixtures PCDD/Fs, DL-PCBs                                                    | No data on intake. Only comparison of non-edible tissues. <i>Study not useful for transfer.</i>                                            |
| <b>Huwe and Smith (2005).</b> Laboratory and on-farm studies on the bioaccumulation and elimination of dioxins from a contaminated mineral supplement fed to dairy cows.     | Dairy Cows | Mixtures of PCDD/Fs + DL-PCBs                                                | Both exposure and elimination period                                                                                                       |
| <b>Hirako (2008a).</b> Transfer and accumulation of persistent organochlorine compounds from bovine dams to newborn and suckling calves.                                     | Beef Cows  | Mixtures PCDD/Fs, DL-PCBs                                                    | Exposure to low background levels; levels in milk and blood dams and calves. <i>Study not useful for transfer.</i>                         |
| <b>Hirako (2008b).</b> Distribution of PCDDs, PCDFs and dioxin-like PCBs in the blood, testis and adipose tissue of suckling beef calves.                                    | Beef Cows  | Mixtures PCDD/Fs, DL-PCBs                                                    | Field study. No information on on exposure. Only very young calves and only data in testes and adipose tissue. <i>Study not useful for</i> |

| Reference                                                                                                                                                                                                       | Species    | Compounds                          | Comments                                                 |
|-----------------------------------------------------------------------------------------------------------------------------------------------------------------------------------------------------------------|------------|------------------------------------|----------------------------------------------------------|
|                                                                                                                                                                                                                 |            |                                    | <i>transfer.</i>                                         |
| <b>Hoogenboom et al. (2010).</b> Kaolinic clay derived PCDD/Fs in the feed chain from a sorting process for potatoes.                                                                                           | Dairy Cows | Mixtures of PCDD/Fs                | Only elimination period                                  |
| <b>Petro et al. (2010).</b> Occurrence of endocrine disrupting compounds in tissues and body fluids of Belgian dairy cows and its implications for the use of the cow as a model to study endocrine disruption. | Dairy Cows | PCB-105, PCB-118, PCB-156, PCB-167 | <i>Study not useful for transfer</i>                     |
| <b>Rossi et al. (2010).</b> Monitoring of the declining trend of Polychlorobiphenyls concentration in milk of contaminated dairy cows.                                                                          | Dairy Cows | PCB-118                            | Only depletion.<br><i>Study not useful for transfer.</i> |
| <b>De Filippis et al. (2013).</b> PCDD/Fs and DL-PCBs distribution in tissues and dairy products of dairy buffaloes.                                                                                            | Buffaloes  | Mixtures PCDD/Fs, DL-PCBs          | Comparison of milk and tissue levels at 1 time-point     |
| <b>Hoogenboom et al. (2015a).</b> Carry-over of PCDD/Fs and PCBs in dairy cows fed smoke contaminated maize silage or sugar beet pulp.                                                                          | Dairy Cows | Mixtures PCDD/Fs, DL-PCBs          | Both exposure and elimination period                     |

**Table 46.** Studies retrieved in the literature search and selection for relevance to inform about the toxicokinetics and transfer in **sheep**

| Reference                                                                                                                                                                                             | Species | Compounds                 | Comments                                                                                                                                        |
|-------------------------------------------------------------------------------------------------------------------------------------------------------------------------------------------------------|---------|---------------------------|-------------------------------------------------------------------------------------------------------------------------------------------------|
| <b>Jan et al. (1999).</b> Tissue distribution of planar and non-planar chlorobiphenyls, 4,4'-DDE and hexachlorobenzene in sheep and lambs.                                                            | Sheep   | PCB-169                   | i.m injection; not oral. Blood, adipose tissue, brain and liver analysed; liver sequestration of PCB 169. <i>Study not useful for transfer.</i> |
| <b>Jan et al. (2001).</b> Bioconcentration of lipophilic organochlorines in ovine dentine.                                                                                                            | Sheep   | PCB-169                   | i.m injection, not oral. Co-exposure with HCB/DDT. Adipose tissue and teeth analysed. <i>Study not useful for transfer.</i>                     |
| <b>Vrecl et al. (2005).</b> Excretion pattern of co-planar and non-planar tetra- and hexachlorobiphenyls in ovine milk and faeces.                                                                    | Sheep   | PCB-169                   | PCB-169, single injection; not oral. <i>Study not useful for transfer.</i>                                                                      |
| <b>Jan et al. (2006).</b> Distribution of organochlorine pollutants in ovine dental tissues and bone.                                                                                                 | Sheep   | PCB-169                   | i.m. injection (not oral). No edible tissues analysed. <i>Study not useful for transfer.</i>                                                    |
| <b>Rhind et al. (2009).</b> Accumulation of endocrine disrupting compounds in sheep fetal and maternal liver tissue following exposure to pastures treated with sewage sludge.                        | Sheep   | PCB-118                   | <i>Study not useful for PCDD/Fs and DL-PCBs relevant for TEQ.</i>                                                                               |
| <b>Rhind et al. (2010).</b> Maternal and fetal tissue accumulation of selected endocrine disrupting compounds (EDCs) following exposure to sewage sludge-treated pastures before or after conception. | Sheep   | PCB-118                   | <i>Study not useful for PCDD/Fs and DL-PCBs relevant for TEQ</i>                                                                                |
| <b>Berg et al. (2010).</b> Distribution of PCB 118 and PCB 153 and hydroxylated PCB metabolites (OH-CBs) in maternal, fetal and lamb tissues of sheep exposed during gestation and lactation.         | Sheep   | PCB-118                   | <i>Study not useful for PCDD/Fs and DL-PCBs relevant for TEQ</i>                                                                                |
| <b>Rhind et al. (2011).</b> Effect of duration of exposure to sewage sludge-treated pastures on liver tissue accumulation of persistent endocrine disrupting compounds (EDCs) in sheep.               | Sheep   | PCB-118                   | <i>Study not useful for PCDD/Fs and DL-PCBs relevant for TEQ</i>                                                                                |
| <b>Panton et al. (2013).</b> Transfer and uptake of dioxins and polychlorinated biphenyls (PCBs) into sheep: a case study.                                                                            | Sheep   | Mixtures PCDD/Fs, DL-PCBs | Review including field data. levels in feed low and too few animals per time point. <i>Study less suitable for transfer.</i>                    |

| Reference                                                                                                                                                             | Species | Compounds                 | Comments                                                                                                   |
|-----------------------------------------------------------------------------------------------------------------------------------------------------------------------|---------|---------------------------|------------------------------------------------------------------------------------------------------------|
| <b>Jan et al. (2013)</b> . Levels and distribution of organochlorine pollutants in primary dental tissues and bone of lamb.                                           | Sheep   | PCB-169                   | <i>i.m.</i> injection, not oral.; no data on edible tissues. <i>Study not suitable for transfer.</i>       |
| <b>Hoogenboom et al. (2015b)</b> . Accumulation of polychlorinated dibenzo- <i>p</i> -dioxins, dibenzofurans, and biphenyls in livers of young sheep.                 | Sheep   | Mixtures PCDD/Fs, DL-PCBs |                                                                                                            |
| <b>Brambilla et al. (2016)</b> . Potential impact on food safety and food security from persistent organic pollutants in top soil improvers on Mediterranean pasture. | Sheep   | Mixtures PCDD/Fs, DL-PCBs | Modelled data on soil improvers. No specific data on levels in sheep. <i>Study not useful for transfer</i> |

**Table 47.** Studies retrieved in the literature search and selection for relevance to inform about the toxicokinetics and transfer in **goats**

| Reference                                                                                                                                                                         | Species | Compounds                 | Comments                                                                                                                            |
|-----------------------------------------------------------------------------------------------------------------------------------------------------------------------------------|---------|---------------------------|-------------------------------------------------------------------------------------------------------------------------------------|
| <b>Grova et al. (2002)</b> . C-14 Milk, urine and faeces excretion kinetics in lactating goats after an oral administration of C-14 polycyclic aromatic hydrocarbons.             | Goats   | TCDD                      | Only TCDD but still useful                                                                                                          |
| <b>Lyche et al. (2004a)</b> . Levels of PCB 126 and PCB 153 in plasma and tissues in goats exposed during gestation and lactation.                                                | Goats   | PCB-126                   | Only one congener, PCB-126 but co-exposure to PCB-153. <i>Study not useful for transfer.</i>                                        |
| <b>Fouzy and Ruoff (2006)</b> . Distribution of PCDDs/PCDFs into milk and organs of Egyptian Baladi goats after oral supplementation of dioxins.                                  | Goats   | Mixtures PCDD/Fs          | Exposure poorly described with unlikely low levels in milk, not very different from controls. <i>Study not useful for transfer.</i> |
| <b>Costera et al. (2006)</b> . PCDD/F and PCB transfer to milk in goats exposed to a long-term intake of contaminated hay.                                                        | Goats   | Mixtures PCDD/Fs, DL-PCBs |                                                                                                                                     |
| <b>Ounnas et al. (2010)</b> . Polychlorinated biphenyl and low polybrominated diphenyl ether transfer to milk in lactating goats chronically exposed to contaminated soil.        | Goats   | Mixtures DL-PCBs          | Both DL- and NDL-PCBs                                                                                                               |
| <b>Fournier et al. (2013)</b> . Polychlorinated biphenyl (PCB) decontamination kinetics in lactating goats ( <i>Capra hircus</i> ) following a contaminated corn silage exposure. | Goats   | Mixtures PCDD/Fs, DL-PCBs |                                                                                                                                     |
| <b>Feidt et al. (2013)</b> . Relative bioavailability of soil-bound polychlorinated biphenyls in lactating goats.                                                                 | Goats   | PCB-118                   | Only PCB-118. Less relevant for TEQ. <i>Study not useful for transfer.</i>                                                          |

#### A.4.2. Studies in poultry

**Table 48.** Studies retrieved in the literature search and selection for relevance to inform about the toxicokinetics and transfer in **poultry**

| Reference                                                                                                                                                                                                             | Species     | Compounds                     | Comments                                                                         |
|-----------------------------------------------------------------------------------------------------------------------------------------------------------------------------------------------------------------------|-------------|-------------------------------|----------------------------------------------------------------------------------|
| <b>Zabik et al. (1998)</b> . Tissue residues in male chickens fed a 50 ng/kg dietary concentration of 2,3,7,8-TCDD.                                                                                                   | Broilers    | TCDD                          | Only TCDD at high level and only liver analysed. <i>Not useful for transfer.</i> |
| <b>Bargar et al. (2001a)</b> . Maternal transfer of contaminants: case study of the excretion of three PCB congeners and technical-grade endosulfan into eggs by white Leghorn chickens ( <i>Gallus domesticus</i> ). | Laying hens | PCB-105<br>PCB-156<br>PCB-189 | <i>i.m.</i> treatment, not oral. <i>Study not useful for transfer.</i>           |
| <b>Bargar et al. (2001b)</b> . Uptake and distribution of three PCB congeners and endosulfan by                                                                                                                       | Broilers    | PCB-105<br>PCB-156            | <i>s.c.</i> injection. <i>In ovo</i> exposure only embryos studied. <i>Study</i> |



| Reference                                                                                                                                                                                     | Species     | Compounds                 | Comments                                                                                                    |
|-----------------------------------------------------------------------------------------------------------------------------------------------------------------------------------------------|-------------|---------------------------|-------------------------------------------------------------------------------------------------------------|
| developing white leghorn chicken embryos ( <i>Gallus domesticus</i> ).                                                                                                                        |             | PCB-189                   | <i>not useful for transfer.</i>                                                                             |
| <b>Sucman et al. (2001)</b> . Studies on the transfer of harmful substances from feed to chicken tissues.                                                                                     | Broilers    | PCB-118                   | No info on uptake. <i>Not useful for transfer.</i>                                                          |
| <b>De Vos et al (2003)</b> . PCBs in broiler diets: their digestibility and incorporation in body tissues.                                                                                    | Broilers    | PCB-118                   | Only PCB 118; less relevant for PCBs contributing to TEQ                                                    |
| <b>Iben et al. (2003)</b> . Dioxin residues in the edible tissue of broiler chicken.                                                                                                          | Broilers    | Mixtures PCDD/Fs          | Possibly useful for transfer                                                                                |
| <b>Maervoet et al. (2004)</b> . Accumulation and tissue distribution of selected polychlorinated biphenyl congeners in chickens.                                                              | Chicken     | PCB-118                   | + indicator PCBs. Only PCB 118; less relevant for PCBs contributing to TEQ                                  |
| <b>Maervoet et al. (2005)</b> . Uptake and tissue-specific distribution of selected polychlorinated biphenyls in developing chicken embryos.                                                  | Broilers    | PCB-77                    | + PCB-153 and -180. <i>In ovo</i> exposure. <i>Study not useful for transfer</i>                            |
| <b>De Vos et al. (2005)</b> . Digestibility, retention and incorporation of low-level dietary PCB contents in laying hens.                                                                    | Laying hens | PCB-118                   | Only PCB 118; less relevant for congeners contributing to TEQ levels                                        |
| <b>Nishimura et al. (2005)</b> . Dioxin concentrations in body tissues and egg of female chicken.                                                                                             | Laying hens | Mixtures PCDD/Fs, DL-PCBs | Field study with background levels and no increase in egg levels. <i>Levels too low for transfer study.</i> |
| <b>Pirard and De Pauw (2005)</b> . Uptake of PCDDs, PCDFs and coplanar PCBs in chickens.                                                                                                      | Laying hens | Mixtures PCDD/Fs, DL-PCBs | Laying hens; egg production decreased for no obvious reason. <i>Study not suitable for transfer.</i>        |
| <b>Zhao et al. (2006)</b> . Evidence for the transfer of PCBs and PCDD/Fs from soil into biota.                                                                                               | Chicken     | Mixtures PCDD/Fs, DL-PCBs | Very few samples analyzed. <i>Study not suitable for transfer.</i>                                          |
| <b>Van Eijkeren et al. (2006)</b> . A toxicokinetic model for the carry-over of dioxins and PCBs from feed and soil to eggs.                                                                  | Laying hens | Mixtures PCDD/Fs, DL-PCBs | PBPK model. Data from Hoogenboom et al. (2006).                                                             |
| <b>Pirard and De Pauw (2006)</b> . Toxicokinetic study of dioxins and furans in laying chickens.                                                                                              | Laying hens | Mixtures PCDD/Fs          |                                                                                                             |
| <b>Hoogenboom et al. (2006)</b> . Carry-over of dioxins and PCBs from feed and soil to eggs at low contamination levels - influence of mycotoxin binders on the carry-over from feed to eggs. | Laying hens | Mixtures PCDD/Fs, DL-PCBs |                                                                                                             |
| <b>Traag et al. (2006)</b> . Residues of dioxins (PCDD/Fs) and PCBs in eggs, fat and livers of laying hens following consumption of contaminated feed.                                        | Laying hens | Mixtures PCDD/Fs, DL-PCBs |                                                                                                             |
| <b>Parera et al. (2008)</b> . Occurrence and bioaccumulation study of PCDD and PCDF from mineral feed additives.                                                                              | Chicken     | Mixtures PCDD/Fs          | Exposure from clay; only livers examined. To some extent useful.                                            |
| <b>Brambilla et al. (2009)</b> . PCP, PCDDs and PCDFs in eggs from hens exposed to contaminated wood shavings.                                                                                | Laying hens | Mixtures PCDD/Fs          |                                                                                                             |
| <b>Shih et al. (2009)</b> . Uptake of PCDD/Fs in laying ducks.                                                                                                                                | Ducks       | Mixtures of PCDD/Fs       | Study shows BCFs for PCDD/Fs in duck eggs and meat.                                                         |
| <b>Menotta et al. (2010)</b> . Depletion study of PCDD/Fs and dioxin-like PCBs concentrations in contaminated home-produced eggs: Preliminary study.                                          | Laying hens | Mixtures PCDD/Fs, DL-PCBs | Only depletion studied and no intake levels determined. <i>Study not suitable for transfer.</i>             |
| <b>Fournier et al. (2012)</b> . Relative bioavailability to laying hens of indicator polychlorobiphenyls present in soil.                                                                     | Laying hens | PCB-118                   | Only PCB-118. Study not useful for PCDD/Fs and DL-PCBs contributing most to TEQ.                            |
| <b>Lin et al. (2012a)</b> . Coexposure of dioxin-like PCBs and PCDD/Fs in free-range hens and                                                                                                 | Laying hens | Mixtures PCDD/Fs,         | Study on levels on farms; some feed and soil analysed.                                                      |



| Reference                                                                                                                                                              | Species     | Compounds                 | Comments                                                                           |
|------------------------------------------------------------------------------------------------------------------------------------------------------------------------|-------------|---------------------------|------------------------------------------------------------------------------------|
| implications derived from congener profile analysis.                                                                                                                   |             | DL-PCBs                   | <i>Not a transfer study, so not suitable.</i>                                      |
| <b>Piskorska-Pliszczynska et al. (2014).</b> Soil as a source of dioxin contamination in eggs from free-range hens on a Polish farm.                                   | Laying hens | Mixtures PCDD/Fs, DL-PCBs | Ingestion of contaminated soil. <i>Study not useful for transfer feed to eggs.</i> |
| <b>Zheng et al. (2015).</b> Contaminant sources, gastrointestinal absorption, and tissue distribution of organohalogenated pollutants in chicken from an e-waste site. | Chicken     | PCB-118                   | Limited information and only on PCB-118. <i>Study not useful for transfer.</i>     |

#### A.4.3. Studies in pigs

**Table 49.** Studies retrieved in the literature search and selection for relevance to inform about the toxicokinetics and transfer in pigs

| Reference                                                                                                                                                                                                                                                                                   | Species | Compounds                                | Comments                                                                                                           |
|---------------------------------------------------------------------------------------------------------------------------------------------------------------------------------------------------------------------------------------------------------------------------------------------|---------|------------------------------------------|--------------------------------------------------------------------------------------------------------------------|
| <b>Qiao and Riviere (2001).</b> Enhanced systemic tissue distribution after dermal versus intravenous 3,3',4,4'-tetrachlorobiphenyl exposure: limited utility of radiolabel blood area under the curve and excretion data in dermal absorption calculations and tissue exposure assessment. | Swine   | PCB-77                                   | Dermal vs iv exposure. Not oral. <i>Study not useful for transfer</i>                                              |
| <b>Rychen et al. (2002).</b> Milk-arterial plasma transfer of PCDDs and PCDFs in pigs.                                                                                                                                                                                                      | Swine   | Mixtures PCDD/Fs                         | Only plasma, no tissues. <i>Study not useful for transfer.</i>                                                     |
| <b>Cavret et al. (2003).</b> Intestinal absorption of 14C from 14C-phenanthrene, 14C-benzo[a]pyrene and 14C-tetrachlorodibenzo-para-dioxin: approaches with the Caco-2 cell line and with portal absorption measurements in growing pigs.                                                   | Swine   | TCDD                                     | Only plasma levels. <i>Study not useful for transfer.</i>                                                          |
| <b>Spitaler et al. (2005).</b> Dioxin residues in the edible tissue of finishing pigs after dioxin feeding.                                                                                                                                                                                 | Swine   | Mixtures PCDD/Fs                         |                                                                                                                    |
| <b>Hoogenboom et al. (2007).</b> A novel source for dioxins present in recycled fat from gelatin production.                                                                                                                                                                                | Swine   | Mixtures PCDD/Fs                         | Gelatin incident and use of PBPK model                                                                             |
| <b>Wittsiepe et al. (2007).</b> Bioavailability of PCDD/F from contaminated soil in young Goettingen minipigs.                                                                                                                                                                              | Swine   | Mixtures PCDD/Fs                         | Study with soil, not feed; showing relatively poor bioavailability. <i>Study not suitable for estimating BCFs.</i> |
| <b>Watanabe et al. (2010).</b> Dioxin-like and perfluorinated compounds in pigs in an Indian open waste dumping site: toxicokinetics and effects on hepatic cytochrome P450 and blood plasma hormones.                                                                                      | Swine   | Mixture PCDD/Fs, DL-PCBs                 | Exposure unknown; relevant information on liver sequestration.                                                     |
| <b>Brambilla et al. (2011a).</b> Bioaccumulation of dioxin-like substances and selected brominated flame retardant congeners in the fat and livers of black pigs farmed within the Nebrodi Regional Park of Sicily.                                                                         | Swine   | Mixture PCDD/Fs, DL-PCBs                 | Farmed and wild pigs; no data on exposure.                                                                         |
| <b>Rose et al. (2012).</b> Transfer and uptake of polychlorinated dibenzo- <i>p</i> -dioxins and furans (PCDD/Fs) and polychlorinated biphenyls (PCBs) into meat and organs of indoor and outdoor reared pigs.                                                                              | Swine   | Mixtures PCDD/Fs, DL-PCBs                | Few animals; low levels, most below LOQ. <i>Study less suitable for transfer.</i>                                  |
| <b>Shen et al. (2012a).</b> Physiologically based persistent organic pollutant accumulation in pig tissues and their edible safety differences: an <i>in vivo</i> study.                                                                                                                    | Swine   | Mixture of TCDD, PCDD, 1,2,3,4,78-HxCDD, | 11 weeks exposure, 10 week elimination; biopsies at wk 11, 16 and 21. Other tissues at week 21                     |

| Reference                                                                                                                          | Species | Compounds                                            | Comments |
|------------------------------------------------------------------------------------------------------------------------------------|---------|------------------------------------------------------|----------|
|                                                                                                                                    |         | 1,2,3,4,6,7,8-HpCDD, OCDD, TCDF, PCDF, OCDF, PCB-126 |          |
| <b>Shen et al. (2012b)</b> . The predictive power of the elimination of dioxin-like pollutants from pigs: an <i>in vivo</i> study. | Swine   | Mixtures PCDD/Fs, DL-PCBs                            |          |
| <b>Adolphs et al. (2013)</b> . A probabilistic model for the carry-over of PCDD/Fs from feed to growing pigs.                      | Swine   | Mixtures PCDD/Fs                                     |          |

#### A.4.4. Studies in several species (ruminants, pigs, poultry)

**Table 50.** Studies retrieved in the literature search and selection for relevance to inform about the toxicokinetics and transfer in **several species**

| Reference                                                                                                                                                                                         | Species                      | Compounds                                              | Comments                                                                                                        |
|---------------------------------------------------------------------------------------------------------------------------------------------------------------------------------------------------|------------------------------|--------------------------------------------------------|-----------------------------------------------------------------------------------------------------------------|
| <b>Hoogenboom et al. (2004)</b> . Residues of dioxins and PCBs in fat of growing pigs and broilers fed contaminated feed.                                                                         | Chicken<br>Pigs              | Mixtures PCDD/Fs, DL-PCBs                              |                                                                                                                 |
| <b>Hirai et al. (2004)</b> . Congener-specific intake fractions for PCDDs/DFs and Co-PCBs: modeling and validation.                                                                               | Cow<br>Chicken<br>Fish       | Mixtures PCDD/Fs, DL-PCBs                              | Full chain model but no new data on transfer. <i>Not suitable for transfer, since no additional information</i> |
| <b>Feidt et al. (2005)</b> . Evaluation of the risk of PAHs and dioxins transfer to humans via the dairy ruminant.                                                                                | Goats<br>Pigs                | TCDD                                                   | Data from other studies, already described above.                                                               |
| <b>Schulz et al. (2005)</b> . Dioxin concentration in milk and tissues of cows and sheep related to feed and soil contamination.                                                                  | Cow<br>Sheep                 | Mixtures PCDD/Fs, DL-PCBs                              | No data on intake levels. <i>Study less useful for transfer</i>                                                 |
| <b>Fernandes et al. (2011)</b> . The assimilation of dioxins and PCBs in conventionally reared farm animals: occurrence and biotransfer factors.                                                  | Sheep<br>Chicken<br>Pigs     | Mixtures PCDD/Fs, DL-PCBs                              | <i>Study useful for transfer</i>                                                                                |
| <b>Fierens et al. (2014)</b> . Modelling the environmental transfer of phthalates and polychlorinated dibenzo- <i>p</i> -dioxins and dibenzofurans into agricultural products: The EN-forc model. | Ruminants<br>Poultry<br>Pigs | TCDD<br>TCDF<br>1,2,3,6,7,8-HxCDD<br>1,2,3,6,7,8-HxCDF | Model on food chain, using data from other studies; no new data on transfer                                     |
| <b>Åberg et al. (2015)</b> . Performance of the CalTOX fate and exposure model in a case study for a dioxin-contaminated site.                                                                    | Cow<br>Poultry               | Mixtures PCDD/Fs                                       | Chain model; no new data on transfer in animals.                                                                |

#### A.4.5. Studies in fish

**Table 51.** Studies retrieved in the literature search and selection for relevance to inform the toxicokinetics and transfer in **salmonids - salmon**

| Reference                                                                                                                                                                                                                                                                             | Species         | Compounds                 | Exposure                     | Comments                                                                            |
|---------------------------------------------------------------------------------------------------------------------------------------------------------------------------------------------------------------------------------------------------------------------------------------|-----------------|---------------------------|------------------------------|-------------------------------------------------------------------------------------|
|                                                                                                                                                                                                                                                                                       |                 |                           | Elimination period           |                                                                                     |
| <b>Isosaari et al. (2004).</b><br>Accumulation and distribution of polychlorinated dibenzo- <i>p</i> -dioxin, dibenzofuran, and polychlorinated biphenyl congeners in Atlantic salmon ( <i>Salmo salar</i> ).                                                                         | Atlantic salmon | Mixtures PCDD/Fs, DL-PCBs | Multiple exposure<br>No      | Dietary exposure. PCDD/F + PCB-77, -81, -126, -169 (and other PCBs). TEQs provided. |
| <b>Berntssen et al. (2011).</b> Carry-over of dietary organochlorine pesticides, PCDD/Fs, PCBs, and brominated flame retardants to Atlantic salmon ( <i>Salmo salar</i> L.) fillets.                                                                                                  | Atlantic salmon | Mixtures PCDD/Fs, DL-PCBs | Multiple exposure<br>No      | Mixture of POPs including OCPs and BFRs. WHO-TEQs provided                          |
| <b>Berntssen et al. (2010a).</b><br>Chemical contaminants in aquafeeds and Atlantic salmon ( <i>Salmo salar</i> ) following the use of traditional- versus alternative feed ingredients.                                                                                              | Atlantic salmon | Mixtures PCDD/Fs, DL-PCBs | Multiple exposure<br>No      | 17 + 12 target congeners. Mixture of POPs found in commercial fish feed.            |
| <b>Bell et al. (2012).</b> Complete replacement of fish oil with a blend of vegetable oils affects dioxin, dioxin-like polychlorinated biphenyls (PCBs) and polybrominated diphenyl ethers (PBDEs) in 3 Atlantic salmon ( <i>Salmo salar</i> ) families differing in flesh adiposity. | Atlantic salmon | Mixtures PCDD/Fs, DL-PCBs | Multiple exposure<br>No      |                                                                                     |
| <b>Lundebye et al. (2004).</b> Dietary uptake of dioxins (PCDD/PCDFs) and dioxin-like PCBs in Atlantic salmon ( <i>Salmo salar</i> ).                                                                                                                                                 | Atlantic salmon | Mixtures PCDD/Fs, DL-PCBs | Multiple exposure<br>No      | Dietary exposure. WHO-TEQs. Levels in fish muscle.                                  |
| <b>Sprague et al. (2010).</b> Effects of decontaminated fish oil or a fish and vegetable oil blend on persistent organic pollutant and fatty acid compositions in diet and flesh of Atlantic salmon ( <i>Salmo solar</i> ).                                                           | Atlantic salmon | Mixtures PCDD/Fs, DL-PCBs | Multiple exposure<br>No      |                                                                                     |
| <b>Friesen et al. (2015).</b> Influence of terrestrial lipid and protein sources and activated carbon-treated fish oil on levels of persistent organic pollutants and fatty acids in the flesh of Atlantic salmon.                                                                    | Atlantic salmon | Mixtures PCDD/Fs, DL-PCBs | Multiple exposure<br>Unclear |                                                                                     |
| <b>Berntssen et al. (2007).</b> Predicting World Health Organization toxic equivalency factor dioxin and dioxin-like polychlorinated biphenyl levels in farmed Atlantic salmon ( <i>Salmo salar</i> ) based on known levels in feed.                                                  | Atlantic salmon | Mixtures PCDD/Fs, DL-PCBs | Multiple exposure<br>No      |                                                                                     |
| <b>Sprague et al. (2015).</b><br>Replacement of fish oil with a DHA-rich algal meal derived from <i>Schizochytrium</i> sp on the fatty acid and persistent organic pollutant levels in diets and flesh of Atlantic salmon                                                             | Atlantic salmon | Mixtures PCDD/Fs, DL-PCBs | Multiple exposure<br>No      | 'Indirect' study. Levels in the diets and in the salmon fillet.                     |

| Reference                                                                                                                                                                                               | Species         | Compounds                 | Exposure<br>Elimination<br>period | Comments                                                                                  |
|---------------------------------------------------------------------------------------------------------------------------------------------------------------------------------------------------------|-----------------|---------------------------|-----------------------------------|-------------------------------------------------------------------------------------------|
| <i>(Salmo salar, L.)</i> post-smolts.                                                                                                                                                                   |                 |                           |                                   |                                                                                           |
| <b>Bell et al. (2005)</b> . Dioxin and dioxin-like polychlorinated biphenyls (PCBS) in Scottish farmed salmon ( <i>Salmo salar</i> ): effects of replacement of dietary marine fish oil vegetable oils. | Atlantic salmon | Mixtures PCDD/Fs, DL-PCBs | Multiple exposure<br>Yes          | TEQs                                                                                      |
| <b>Berntssen et al. (2016)</b> . Modelling scenarios on feed-to-fillet transfer of dioxins and dioxinlike PCBs in future feeds to farmed Atlantic salmon ( <i>Salmo salar</i> )                         | Atlantic salmon | Mixtures PCDD/Fs, DL-PCBs | Multiple exposure<br>Unclear      | Feed experiment. WHO-TEQs.                                                                |
| <b>Karjalainen et al. (2006)</b> . Tissue-specific and whole-fish accumulation of polychlorinated biphenyls by juvenile Baltic salmon ( <i>Salmo salar</i> L.) after oral gavage exposure.              | Salmon          | PCB-169                   | Single exposure<br>Unclear        | Exposure of fish through gelatine capsules. Levels in gonads, muscle, liver and intestine |

**Table 52.** Studies retrieved in the literature search and selection for relevance to inform the toxicokinetics and transfer in **salmonids - trout**

| Reference                                                                                                                                                                                                         | Species       | Compounds                                                | Exposure<br>Elimination<br>period | Comments                                               |
|-------------------------------------------------------------------------------------------------------------------------------------------------------------------------------------------------------------------|---------------|----------------------------------------------------------|-----------------------------------|--------------------------------------------------------|
| <b>Jones et al. (2001)</b> . Accumulation of 2,3,7,8-tetrachlorodibenzo- <i>p</i> -dioxin by rainbow trout ( <i>Onchorhynchus mykiss</i> ) at environmentally relevant dietary concentrations.                    | Rainbow trout | TCDD                                                     | Single exposure<br>No             | Dietary exposure. Levels in muscle, liver and ovaries. |
| <b>Tietge et al. (1998)</b> . Reproductive toxicity and disposition of 2,3,7,8-tetrachlorodibenzo- <i>p</i> -dioxin in adult brook trout ( <i>Salvelinus fontinalis</i> ) following a dietary exposure.           | Brook trout   | TCDD                                                     | Multiple exposure<br>Yes          |                                                        |
| <b>Sherman et al. (1992)</b> . Reevaluation of dioxin bioconcentration and bioaccumulation factors for regulatory purposes.                                                                                       | Lake trout    | TCDD                                                     | Unclear<br>No                     |                                                        |
| <b>Branson et al. (1985)</b> . Bioconcentration kinetics of 2,3,7,8-tetrachlorodibenzo- <i>p</i> -dioxin in rainbow-trout.                                                                                        | Rainbow trout | TCDD                                                     | Unclear<br>Unclear                |                                                        |
| <b>Kleeman et al. (1986)</b> . Metabolism and disposition of 2,3,7,8-tetrachlorodibenzo- <i>p</i> -dioxin in rainbow trout.                                                                                       | Rainbow trout | TCDD                                                     | Multiple exposure<br>Yes          |                                                        |
| <b>Brambilla et al. (2007)</b> . Depletion of selected polychlorinated biphenyl, dibenzodioxin, and dibenzofuran congeners in farmed rainbow trout ( <i>Oncorhynchus mykiss</i> ): A hint for safer fish farming. | Rainbow trout | TCDD, TCDF, 1,2,3,7,8-PeCDD, 1,2,3,7,8-PeCDF, OCDD, OCDF | Multiple exposure<br>Yes          |                                                        |
| <b>Servos et al. (1989)</b> . The effect of dissolved organic-matter on the                                                                                                                                       | Rainbow trout | TCDD, 1,2,3,4,7,8-                                       | Multiple exposure                 | Transfer water/fish. Aquatic exposure (detritus)       |

| Reference                                                                                                                                                                                                                                 | Species       | Compounds                                 | Exposure Elimination period  | Comments                                                                                                                           |
|-------------------------------------------------------------------------------------------------------------------------------------------------------------------------------------------------------------------------------------------|---------------|-------------------------------------------|------------------------------|------------------------------------------------------------------------------------------------------------------------------------|
| bioavailability of polychlorinated dibenzo-para-dioxins.                                                                                                                                                                                  |               | HxCDD, 1,2,3,4,6,7,8 -HpCDD, OCDD         | No                           |                                                                                                                                    |
| <b>Sijm et al. (1990).</b> Biotransformation and tissue distribution of 1,2,3,7-tetrachlorodibenzo-para-dioxin, 1,2,3,4,7-pentachlorodibenzo-para-dioxin and 2,3,4,7,8-pentachlorodibenzofuran in rainbow-trout.                          | Rainbow trout | 23478-PeCDF                               | Single exposure<br><br>Yes   | Administration via gelatine capsules                                                                                               |
| <b>Sijm et al. (1993).</b> The influence of temperature on the uptake rate constants of hydrophobic compounds determined by the isolated perfused gills of rainbow-trout ( <i>oncorhynchus-mykiss</i> ).                                  | Rainbow trout | OCDD                                      | Single exposure<br><br>No    | Water-fish transfer. OCDD not detected in the gill studies                                                                         |
| <b>Koponen et al. (2000).</b> Accumulation pattern and biotransformation enzyme induction in rainbow trout embryos exposed to sublethal aqueous concentrations of 3,3',4,4'-tetrachlorobiphenyl.                                          | Rainbow trout | PCB-77                                    | Single exposure<br><br>No    | Aquatic exposure of embryos                                                                                                        |
| <b>Koponen et al. (1998).</b> Chemical accumulation and biotransformation enzyme activities of rainbow trout embryos in waterborne exposure to PCB-77.                                                                                    | Rainbow trout | PCB-77                                    | Unclear<br><br>No            | Accumulation in eggs                                                                                                               |
| <b>Brown et al. (2002).</b> Dietary accumulation and biochemical responses of juvenile rainbow trout ( <i>Oncorhynchus mykiss</i> ) to 3,3',4,4',5-pentachlorobiphenyl (PCB 126).                                                         | Rainbow trout | PCB-126                                   | Multiple exposure<br><br>Yes |                                                                                                                                    |
| <b>Huuskonen et al. (1996).</b> Effects of non-ortho-substituted polychlorinated biphenyls (Congeners 77 and 126) on cytochrome P4501A and conjugation activities in rainbow trout ( <i>Oncorhynchus mykiss</i> ).                        | Rainbow trout | PCB-77, -126                              | Single exposure<br><br>No    | <i>i.p.</i> injection                                                                                                              |
| <b>Buckman et al. (2007a).</b> Role of temperature and enzyme induction in the biotransformation of polychlorinated biphenyls and bioformation of hydroxylated polychlorinated biphenyls by rainbow trout ( <i>Oncorhynchus mykiss</i> ). | Trout         | PCB-77, -126, -169                        | Single exposure<br><br>Yes   | Spiked fish food.                                                                                                                  |
| <b>Buckman et al. (2004).</b> Toxicokinetics of three polychlorinated biphenyl technical mixtures in rainbow trout ( <i>Oncorhynchus mykiss</i> ).                                                                                        | Trout         | PCB-105, -118, -114, -118, -156, -167     | Multiple exposure<br><br>Yes | Fish fed feed spiked with Aroclor mixtures, but congener specific analysis of the feed.                                            |
| <b>Coristine et al. (1996).</b> Elimination rates of selected di-ortho, mono-ortho, and non-ortho substituted polychlorinated biphenyls in rainbow trout ( <i>Oncorhynchus mykiss</i> ).                                                  | Tainbow trout | PCB-77, -81, -126, -169, -105, -118, -156 | Single exposure<br><br>Yes   | Influence of chlorine substitution pattern on elimination rate constants. <i>i.p.</i> injection. Corn oil spiked with PCB mixture. |
| <b>Isosaari et al. (2002).</b> Feeding trial on rainbow trout: comparison of dry fish feed and Baltic herring as a                                                                                                                        | Rainbow trout | Mixtures of PCDD/Fs + DL-PCBs             | Multiple exposure            | Dietary exposure. TEQs provided.                                                                                                   |

| Reference                                                                                                                                                                                                                                                 | Species       | Compounds                     | Exposure<br>Elimination<br>period | Comments |
|-----------------------------------------------------------------------------------------------------------------------------------------------------------------------------------------------------------------------------------------------------------|---------------|-------------------------------|-----------------------------------|----------|
| source of PCDD/Fs and PCBs.                                                                                                                                                                                                                               |               |                               | No                                |          |
| <b>Drew et al. (2007).</b> Dietary influence of replacing fish meal and oil with canola protein concentrate and vegetable oils on growth performance, fatty acid composition and organochlorine residues in rainbow trout ( <i>Oncorhynchus mykiss</i> ). | Rainbow trout | Mixtures of PCDD/Fs + DL-PCBs | Multiple exposure<br><br>No       | TEQs     |

**Table 53.** Studies retrieved in the literature search and selection for relevance to inform the toxicokinetics and transfer in **other fish species**

| Reference                                                                                                                                                                                                                                                 | Compounds                                        | Species           | Exposure<br>Elimination<br>period | Comments                                                                                                                                                                                                   |
|-----------------------------------------------------------------------------------------------------------------------------------------------------------------------------------------------------------------------------------------------------------|--------------------------------------------------|-------------------|-----------------------------------|------------------------------------------------------------------------------------------------------------------------------------------------------------------------------------------------------------|
| <b>Nilsson et al. (2006).</b> Selective supercritical fluid extraction to identify aged sediment-bound PCBs available for uptake by eel.                                                                                                                  | PCB-105, PCB-118                                 | Eel               | Unclear<br><br>Unclear            | Sediment to fish transfer.                                                                                                                                                                                 |
| <b>De Boer and Pieters (1991).</b> Dietary accumulation of polychlorinated biphenyls chlorinated pesticides and mercury by cultivated eels <i>anguilla-anguilla</i> L.                                                                                    | PCB-118                                          | Eel               | Multiple exposure<br><br>No       | Dietary exposure, but feed not spiked. Analyses in fed and fish muscle.                                                                                                                                    |
| <b>Ruus et al. (2012).</b> Accumulation of polychlorinated biphenyls from contaminated sediment by Atlantic cod ( <i>Gadus morhua</i> ): Direct accumulation from resuspended sediment and dietary accumulation via the polychaete <i>Nereis virens</i> . | PCB-118                                          | Cod               | Unclear<br><br>Unclear            | (i) Fish exposed to sediments naturally contaminated with PCBs.<br>(ii) Fish fed polychaete worms previously exposed to sediment.<br>Congener specific analysis of 7 indicator PCBs in sediments and fish. |
| <b>Ingebrigtsen et al. (1990).</b> Species-specific accumulation of the polychlorinated biphenyl (PCB) 2,3,3',4,4'-pentachlorobiphenyl in fish brain - a comparison between cod ( <i>Gadus morhua</i> ) and rainbow-trout ( <i>oncorhynchus-mykiss</i> ). | PCB-105                                          | Cod               | No                                | Radiography, not analysed tissue concentrations of PCB-105                                                                                                                                                 |
| <b>Zhang et al. (2011).</b> Bioaccumulation and trophic transfer of dioxins in marine copepods and fish.                                                                                                                                                  | unclear                                          | Black seabream    | Multiple exposure<br><br>No       | Waterborne exposure. Uptake of dioxin in the black seabreams. Unclear what is referred by 'dioxins'.                                                                                                       |
| <b>Ábalos et al. (2011).</b> Decontamination trends in the aquacultured fish gilthead seabream ( <i>Sparus aurata</i> ) after feeding long-term a PCDD/F spiked feed.                                                                                     | Mixtures PCDD/Fs                                 | Gilthead seabream | Multiple exposure<br><br>Yes      |                                                                                                                                                                                                            |
| <b>Kobayashi et al. (2011).</b> Dietary uptake kinetics of polychlorinated biphenyls from sediment-contaminated sandworms in a marine benthic fish ( <i>Pseudopleuronectes yokohamae</i> ).                                                               | PCB-77, -105, -114, -118, -123, -156, -157, -167 | Marbled sole      | Multiple exposure<br><br>Yes      | Sole fed PCB-contaminated sandworms and then uncontaminated sandworms. No report of congener specific concentrations in sandworms.                                                                         |



| Reference                                                                                                                                                                                                   | Compounds                 | Species         | Exposure<br><br>Elimination period | Comments                                                                                                                                     |
|-------------------------------------------------------------------------------------------------------------------------------------------------------------------------------------------------------------|---------------------------|-----------------|------------------------------------|----------------------------------------------------------------------------------------------------------------------------------------------|
| <b>Antunes et al. (2008).</b> Organ-specific accumulation and elimination patterns of PCBs in adult seabass ( <i>Dicentrarchus labrax</i> ).                                                                | PCB-105, -118             | Seabass         | Multiple exposure<br><br>Yes       | Exposure via food added to the water                                                                                                         |
| <b>Nacher-Mestre et al. (2009).</b> Effects of fish oil replacement and re-feeding on the bioaccumulation of organochlorine compounds in gilthead sea bream ( <i>Sparus aurata</i> L.) of market size.      | PCB-105, -118, -126       | Seabream        | Multiple exposure<br><br>No        |                                                                                                                                              |
| <b>Hellou et al. (1999).</b> Levels, persistence and bioavailability of organic contaminants present in marine harbor sediments impacted by raw sewage.                                                     | PCB-118, OCDD, TCDF       | Winter flounder | Multiple exposure<br><br>No        | Transfer sediment to fish. Doubts about identification of dioxins/furans.                                                                    |
| <b>Blanco et al. (2007).</b> Dietary uptake of dioxins (PCDD/PCDFs) and dioxin-like PCBs in Spanish aquacultured turbot ( <i>Psetta maxima</i> ).                                                           | Mixtures PCDD/Fs, DL-PCBs | Turbot          | Multiple exposure<br><br>No        | Dietary exposure, but feed was not spiked. Analysis of feed and fish muscle.                                                                 |
| <b>Steward et al. (1996).</b> Disposition and metabolism of 2,3,7,8-tetrachlorodibenzofuran by channel catfish ( <i>Ictalurus punctatus</i> ).                                                              | TCDF                      | Channel catfish | Single exposure<br><br>Unclear     | Blood, bile, liver, kidney, stomach, stomach contents, intestines, intestinal contents, abdominal fat, muscle fillets, and carcass analysed. |
| <b>Bureau et al. (1997).</b> Dietary uptake in pike ( <i>Esox lucius</i> ) of some polychlorinated biphenyls, polychlorinated naphthalenes and polybrominated diphenyl ethers administered in natural diet. | PCB-77, -118              | Pike            | Single exposure<br><br>No          | Dietary exposure. Pike fed trout spiked with compounds. Congener specific analysis.                                                          |
| <b>Hajslovia et al. (1997).</b> Elimination of PCBs from heavily contaminated carp ( <i>Cyprinus carpio</i> L.) in clean water-depuration study.                                                            | PCB-118                   | Carp            | Multiple exposure<br><br>Yes       | Elimination of PCBs, including PCB-118                                                                                                       |
| <b>Kuehl et al. (1987a).</b> Bioavailability of polychlorinated dibenzo- <i>p</i> -dioxins and dibenzofurans from contaminated wisconsin river sediment to carp.                                            | TCDD                      | Carp            | Multiple exposure<br><br>Yes       | Exposure of fish to TCDD contaminated sediments.                                                                                             |
| <b>Kuehl et al. (1985).</b> Bioavailability of 2,3,7,8-tetrachlorodibenzo- <i>p</i> -dioxin from municipal incinerator fly-ash to fresh-water fish.                                                         | TCDD                      | Carp            | Multiple exposure<br><br>Unclear   | Exposure of fish to fly ash. Aquatic exposure.                                                                                               |
| <b>Liu et al. (2010).</b> The influence of diet on the assimilation efficiency of 47 polychlorinated biphenyl congeners in Japanese koi ( <i>Cyprinus carpio</i> ).                                         | PCB-105, -118             | Japanese koi    | Multiple exposure<br><br>Unclear   | Feed contaminated with an Aroclor mixture. Info on congener specific concentration in diets in supplemental information.                     |
| <b>Paterson et al. (2010).</b> Contribution of Fecal Egestion to the Whole Body Elimination of Polychlorinated Biphenyls by Japanese Koi ( <i>Cyprinus carpio</i> ).                                        | PCB-105, -118, -156       | Japanese koi    | Single exposure<br><br>Yes         | Fish <i>i.p</i> injected with Aroclor mixtures, but then congener specific analysis.                                                         |
| <b>Loonen et al. (1994).</b> Bioconcentration of polychlorinated dibenzo- <i>p</i> -dioxins and polychlorinated dibenzofurans in guppies after                                                              | Mixtures PCDD/Fs          | Cuppies         | Multiple exposure<br><br>Unclear   | Water-fish transfer. Water 'spiked' with fly ash. Uptake and elimination constants.                                                          |



| Reference                                                                                                                                                                                                                        | Compounds                            | Species                       | Exposure<br>Elimination period | Comments                                                                                                                                        |
|----------------------------------------------------------------------------------------------------------------------------------------------------------------------------------------------------------------------------------|--------------------------------------|-------------------------------|--------------------------------|-------------------------------------------------------------------------------------------------------------------------------------------------|
| aqueous exposure to a complex pcdd pcdf mixture - relationship with molecular-structure.                                                                                                                                         |                                      |                               |                                |                                                                                                                                                 |
| <b>Madenjian et al. (2008).</b> Net trophic transfer efficiencies of polychlorinated biphenyl congeners to lake whitefish ( <i>Coregonus clupeaformis</i> ) from their food.                                                     | PCB-105, PCB-118, PCB-156            | lake whitefish                | Multiple exposure<br>Unclear   | Whitefish fed trout. Concentrations determined in both at the start and end of feeding experiment. Transfer efficiency.<br><i>Video Journal</i> |
| <b>Madenjian et al. (2014).</b> Laboratory estimation of net trophic transfer efficiencies of PCB Congeners to lake trout ( <i>Salvelinus namaycush</i> ) from its prey.                                                         | Individual target PCDD/Fs or DL-PCBs | Fish                          |                                |                                                                                                                                                 |
| <b>Bernhoft et al. (1994).</b> Distribution and effects on hepatic xenobiotic-metabolizing enzymes of 2,3,3',4,4'-pentachlorobiphenyl (PCB-105) in cod ( <i>Gadus-morhua</i> ) and rainbow-trout ( <i>Oncorhynchus-mykiss</i> ). | PCB-105                              | Cod, trout                    | Multiple exposure<br>No        |                                                                                                                                                 |
| <b>Sijm et al. (1995).</b> Allometry in the uptake of hydrophobic chemicals determined in-vivo and in isolated-perfused gills.                                                                                                   | OCDD                                 | Rainbow trout, guppies        | No                             | Aquatic exposure and perfused gills                                                                                                             |
| <b>Fisk et al. (1997).</b> Accumulation, depuration and hepatic mixed-function oxidase enzyme induction in juvenile rainbow trout and lake whitefish exposed to dietary 2,3,7,8-tetrachlorodibenzo- <i>p</i> -dioxin.            | TCDD                                 | Rainbow trout, Lake whitefish | Multiple exposure<br>Yes       | Dietary exposure.                                                                                                                               |
| <b>Wang and Lee (2010).</b> Polychlorinated dibenzo- <i>p</i> -dioxin, polychlorinated dibenzofurans and polychlorinated biphenyls in farmed fish, water, sediment, and feed.                                                    | Mixtures PCDD/Fs, DL-PCBs            | Orange spotted grouper        | Multiple exposure<br>No        | TEQs. Not a feeding trial, but data for feed and fish of different ages fed commercial feed.                                                    |
| <b>O'Keefe et al. (1986).</b> Nonaccumulation of chlorinated dioxins and furans by goldfish exposed to contaminated sediment and fly-ash.                                                                                        | TCDD                                 | Goldfish                      | Multiple exposure<br>No        | Transfer from fly ash to fish. Aquatic exposure                                                                                                 |
| <b>Doi et al. (2006).</b> Intestinal bioavailability and biotransformation of 3,3',4,4'-tetrachlorobiphenyl (CB 77) in in situ preparations of channel catfish following dietary induction of CYP1A.                             | PCB-77                               | Channel catfish               | Multiple exposure<br>No        |                                                                                                                                                 |
| <b>Hektoen et al. (1992).</b> Interspecies differences in tissue distribution of 2,3,7,8-tetrachlorodibenzo- <i>p</i> -dioxin between cod ( <i>Gadus-morhua</i> ) and rainbow-trout ( <i>Oncorhynchus-mykiss</i> ).              | TCDD                                 | Rainbow trout, Cod            | Single exposure<br>No          | Intragastrical administration. Autoradiography of radiolabelled TCDD. Not chemical analysis.                                                    |

**Table 54.** Other studies retrieved in the literature search and selection for relevance to inform the toxicokinetics and transfer in **fish**

| Reference                                                                                                                                                                                                             | Compounds                                | Species                                                        | Comments                                                                       |
|-----------------------------------------------------------------------------------------------------------------------------------------------------------------------------------------------------------------------|------------------------------------------|----------------------------------------------------------------|--------------------------------------------------------------------------------|
| <b>Vives et al. (2005).</b> Age dependence of the accumulation of organochlorine pollutants in brown trout ( <i>Salmo trutta</i> ) from a remote high mountain lake (Redo, Pyrenees).                                 | PCB-118                                  | trout                                                          | Field exposure. Determination of PCB-118 in muscle fish and water.             |
| <b>Madenjian et al. (2012).</b> Net trophic transfer efficiencies of polychlorinated biphenyl congeners to lake trout ( <i>Salvelinus namaycush</i> ) from its prey.                                                  | PCB-105, 118, -156                       | lake trout                                                     | Transfer from bloater to trout (prey-predator)                                 |
| <b>Helm et al. (2008).</b> Occurrence and biomagnification of polychlorinated naphthalenes and non- and mono-ortho PCBs in Lake Ontario sediment and biota.                                                           | Individual DL-PCBs                       | lake trout                                                     | Transfer from prey to predator. TEQs.                                          |
| <b>Catalan et al. (2004).</b> The roles of food and water in the bioaccumulation of organochlorine compounds in high mountain lake fish.                                                                              | PCB-118                                  | trout                                                          | PCB-118 as part of the 7 indicator PCBs. Stomach of trout analysed for PCB-118 |
| <b>Endicott et al. (1994).</b> Modeling the partitioning and bioaccumulation of tcdd and other hydrophobic organic-chemicals in lake-Ontario.                                                                         | Mixtures of PCDD/Fs                      | lake trout                                                     | Transfer sediment-fish.                                                        |
| <b>Burkhard et al. (2004).</b> Biota-sediment accumulation factors for polychlorinated biphenyls, dibenzo- <i>p</i> -dioxins, and dibenzofurans in southern Lake Michigan lake trout ( <i>Salvelinus namaycush</i> ). | Mixtures of PCDD/Fs + DL-PCBs            | lake trout                                                     | Sediment-trout accumulation factors. No spiking. Bioaccumulation factors.      |
| <b>Niimi and Oliver (1983).</b> Biological half-lives of polychlorinated biphenyl (PCB) congeners in whole fish and muscle of rainbow-trout ( <i>Salmo gairdneri</i> ).                                               | PCB-77                                   | lake trout                                                     | Compounds administered via gelatine capsule directly into stomach.             |
| <b>Metcalfe and Metcalfe (1997).</b> The trophodynamics of PCBs, including mono- and non-ortho congeners, in the food web of North-Central Lake Ontario.                                                              | PCB-77, -81, -126, -169, 105, -118, -156 | trout, white sucker and sculpin                                | Prey-trout transfer. No spiking. TEQs                                          |
| <b>Bhavsar et al. (2010).</b> Estimating Sediment Quality Thresholds To Prevent Restrictions on Fish Consumption: Application to Polychlorinated Biphenyls and Dioxins-Furans in the Canadian Great Lakes.            | Mixtures of PCDD/Fs                      | lake trout, lake whitefish, rainbow trout, and channel catfish | Transfer sediment-fish. TEQs.                                                  |
| <b>Frakes et al. (1993).</b> Bioaccumulation of 2,3,7,8-tetrachlorodibenzo- <i>p</i> -dioxin (TCDD) by fish downstream of pulp and paper-mills in maine.                                                              | TCDD                                     | smallmouth bass, brown trout, white sucker, white perch        | Bioaccumulation factors from water to fish.                                    |
| <b>Giesy et al. (1999).</b> Polychlorinated dibenzo- <i>p</i> -dioxins (PCDDs) and dibenzofurans (PCDFs) in muscle and eggs of salmonid fishes from the Great Lakes.                                                  | Individual PCDD/Fs                       | coho salmon, lake trout, and chinook salmon                    | ADME, field study                                                              |
| <b>Berge et al. (2011).</b> Accumulation of Polychlorinated Dibenz- <i>p</i> -Dioxins and Furans in Atlantic Cod ( <i>Gadus morhua</i> ). Cage Experiments in a Norwegian Fjord.                                      | Mixtures of PCDD/Fs                      | Atlantic cod                                                   | Exposure via water. Accumulation of PCDD/Fs in fish.                           |
| <b>Vuorinen et al. (2012).</b>                                                                                                                                                                                        | Mixtures of                              | salmon                                                         | Field experiment (no spiking / no                                              |

| Reference                                                                                                                                                                                                                         | Compounds                     | Species                         | Comments                                                                                                                                                                                                     |
|-----------------------------------------------------------------------------------------------------------------------------------------------------------------------------------------------------------------------------------|-------------------------------|---------------------------------|--------------------------------------------------------------------------------------------------------------------------------------------------------------------------------------------------------------|
| Biomagnification of organohalogenes in Atlantic salmon ( <i>Salmo salar</i> ) from its main prey species in three areas of the Baltic Sea.                                                                                        | PCDD/Fs + DL-PCBs             |                                 | contam feed). Analysis of the salmon and what they eat (Baltic sprat and herrings). Biomagnification factors.                                                                                                |
| <b>Kelly et al. (2008)</b> . Persistent organic pollutants in aquafeed and Pacific salmon smolts from fish hatcheries in British Columbia, Canada.                                                                                | Mixtures of PCDD/Fs + DL-PCBs | Pacific salmon                  | TEQs. Monitoring data on feed and salmon, not a feeding trial.                                                                                                                                               |
| <b>Madenjian et al. (1999)</b> . Variation in net trophic transfer efficiencies among 21 PCB congeners.                                                                                                                           | PCB-105                       | salmon                          | Net trophic transfer efficiency                                                                                                                                                                              |
| <b>Kelly et al. (2007)</b> . Lipid reserve dynamics and magnification of persistent organic pollutants in spawning sockeye salmon ( <i>Oncorhynchus nerka</i> ) from the Fraser River, British Columbia.                          | Mixtures of PCDD/Fs           | Pacific sockeye salmon          | Occurrence                                                                                                                                                                                                   |
| <b>Debruyne et al. (2004)</b> . Magnification and toxicity of PCBs, PCDDs, and PCDFs in upriver-migrating Pacific salmon.                                                                                                         | Mixtures of PCDD/Fs + DL-PCBs | sockeye salmon                  | Occurrence.                                                                                                                                                                                                  |
| <b>Kelly et al. (2011)</b> . Tissue residue concentrations of organohalogenes and trace elements in adult Pacific salmon returning to the Fraser River, British Columbia, Canada.                                                 | Mixtures of PCDD/Fs + DL-PCBs | Pacific sockeye, chinook salmon | TEQs. Maternal transfer (muscle-eggs ratios)                                                                                                                                                                 |
| <b>Verweij et al. (2004)</b> . Assessment of bioavailable PAH, PCB and OCP concentrations in water, using semipermeable membrane devices (SPMDs), sediments and caged carp.                                                       | PCB-118                       | Carp                            | Field exposure. Analysis of muscle fish (caged), water and sediments.                                                                                                                                        |
| <b>Wu et al. (2008)</b> . Bioaccumulation of polybrominated diphenyl ethers (PBDEs) and polychlorinated biphenyls (PCBs) in wild aquatic species from an electronic waste (e-waste) recycling site in South China.                | PCB-118                       | Carp                            | Field exposure. Analysis of fish and water                                                                                                                                                                   |
| <b>Wu et al. (2001a)</b> . Accumulation and partition of polychlorinated dibenzo- <i>p</i> -dioxins and dibenzofurans (PCDD/F) in the muscle and liver of fish.                                                                   | Mixtures of PCDD/Fs           | Common carp                     | Field study (exposure via water and sediments). Analysis levels in fish muscle, liver and sediments. TEQs provided.                                                                                          |
| <b>Zhu et al. (2015)</b> . Bioconcentration and trophic transfer of polychlorinated biphenyls and polychlorinated dibenzo- <i>p</i> -dioxins and dibenzofurans in aquatic animals from an e-waste dismantling area in East China. | Mixtures of PCDD/Fs + DL-PCBs | carp, eel                       | TEQs (PCDD/Fs plus some DL-PCBs)<br>BCF ratios between conc in water and in biota.                                                                                                                           |
| <b>Wu et al. (2001b)</b> . Bioaccumulation of polychlorinated dibenzo- <i>p</i> -dioxins and dibenzofurans in the foodweb of Ya-Er Lake area, China.                                                                              | Mixtures of PCDD/Fs           | Common carp and bighead         | Transfer/bioaccumulation in foodweb, different aquatic animals, aquatic plants, duck eggs, fish-eating bird eggs and breast tissue. Sediment and water samples collected from the sites also analyzed. TEQs. |
| <b>Moermond et al. (2004)</b> . Uptake of sediment-bound bioavailable polychlorobiphenyls by benthivorous carp ( <i>Cyprinus carpio</i> ).                                                                                        | PCB-105, -118                 | Carp                            | Sediment-fish transfer                                                                                                                                                                                       |
| <b>Kuehl et al. (1987b)</b> . Isomer dependent bioavailability of polychlorinated dibenzo- <i>p</i> -dioxins and dibenzofurans from municipal                                                                                     | Individual PCDD/Fs            | Carp                            | Transfer fly ash-fish                                                                                                                                                                                        |

| Reference                                                                                                                                                                               | Compounds                                              | Species                      | Comments                                                                                                                                               |
|-----------------------------------------------------------------------------------------------------------------------------------------------------------------------------------------|--------------------------------------------------------|------------------------------|--------------------------------------------------------------------------------------------------------------------------------------------------------|
| incinerator fly-ash to carp.                                                                                                                                                            |                                                        |                              |                                                                                                                                                        |
| <b>Koslowski et al. (1994).</b> The distribution of 42 PCBs, including 3 coplanar congeners, in the food-web of the western basin of lake Erie.                                         | PCB-77, -126, -169, -118, -105                         | Carp and gizzard shad        | Transfer - follow-up of an incident (field study)                                                                                                      |
| <b>Colombo et al. (2007).</b> Bioaccumulation of anthropogenic contaminants by detritivorous fish in the Rio de la Plata estuary: 2-Polychlorinated biphenyls.                          | PCB-105, -118, -156                                    | Sabalo                       | Biota sediment accumulation factors                                                                                                                    |
| <b>Cappelletti et al. (2015).</b> Bioaccumulation of dioxin-like PCBs and PBDEs by detritus-feeding fish in the Rio de la Plata estuary, Argentina.                                     | PCB-77, -126, -169, -105, -118, -123, -156, -167, -189 | Sabalo, Prochilodus lineatus | Measurements in settling particles and in a detritivorous fish                                                                                         |
| <b>Sakurai et al. (2009).</b> Non-food-chain transfer of sediment-associated persistent organic pollutants to a marine benthic fish.                                                    | PCB-118                                                | Sole                         | Exposure via sediment/water. Non-food exposure.                                                                                                        |
| <b>Serrano et al. (2003).</b> Biomagnification study on organochlorine compounds in marine aquaculture: the sea bass ( <i>Dicentrarchus labrax</i> ) as a model.                        | PCB-118                                                | Seabass                      | Field experiment. Fish fed feed and the contents of PCBs analysed in both the feed and the fish. Not spiked. Levels in muscle, liver and visceral fat. |
| <b>Loizeau et al. (2001).</b> A steady-state model of PCB bioaccumulation in the sea bass ( <i>Dicentrarchus labrax</i> ) food web from the Seine estuary, France.                      | PCB-105, -118                                          | Seabass                      | Transfer - follow-up of an incident (field study)                                                                                                      |
| <b>vanderOost et al. (1996).</b> Biomonitoring aquatic pollution with feral eel ( <i>Anguilla anguilla</i> ) .1. Bioaccumulation: Biota-sediment ratios of PCBs, OCPs, PCDDs and PCDFs. | Individual PCDD/Fs or DL-PCBs                          | Eel                          | Sediment-fish transfer. No spiking. Some DL-PCBs and some PCDD/Fs. TEQs provided. Bioaccumulation factors.                                             |
| <b>Jahnke et al. (2014).</b> Silicone passive equilibrium samplers as 'chemometers' in eels and sediments of a Swedish lake.                                                            | PCB-118                                                | Eel                          | PCB-118 as part of the 7 indicator PCBs. Sediment-silicone surface-eel.                                                                                |
| <b>Hendriks et al. (1998).</b> Accumulation of metals, polycyclic (halogenated) aromatic hydrocarbons, and biocides in zebra mussel and eel from the Rhine and Meuse rivers.            | PCB-77, -126, -169, -114, -157, -167                   | Eel                          | Transfer - follow-up of an incident (field study)                                                                                                      |
| <b>Stapanian et al. (2013).</b> Sexual difference in PCB congener distributions of burbot ( <i>Lota Iota</i> ) from Lake Erie.                                                          | Individual DL-PCBs                                     | Burbot                       | Differences in concentration according to age. Field study, 86 PCB congeners, two DL-PCB congeners.                                                    |
| <b>Chang et al. (2010).</b> Polychlorinated dibenzo- <i>p</i> -dioxins and dibenzofuran contents in fish and sediment near a pentachlorophenol contaminated site.                       | Mixtures of PCDD/Fs                                    | Milk fish and tilapia        | I-TEQs                                                                                                                                                 |
| <b>Antunes et al. (2007).</b> Depuration of PCBs and DDTs in mullet under captivity clean conditions.                                                                                   | PCB-105, -118                                          | Mullet                       | Fish taken from contaminated area and allowed to depurate in clean water and clean feed. Elimination of PCBs (two DL-PCBs). Field exposure.            |
| <b>Hoekstra et al. (2003).</b> Trophic transfer of persistent organochlorine contaminants (OCs) within an Arctic marine food web from the southern Beaufort-Chukchi Seas.               | PCB-105, -118                                          | Cod and other                | Food web magnification. Data on sum PCBs from field study.                                                                                             |

| Reference                                                                                                                                                                                                                 | Compounds                       | Species                                        | Comments                                                                                         |
|---------------------------------------------------------------------------------------------------------------------------------------------------------------------------------------------------------------------------|---------------------------------|------------------------------------------------|--------------------------------------------------------------------------------------------------|
| <b>Peltonen et al. (2007).</b> Predicting effects of exploitation rate on weight-at-age, population dynamics, and bioaccumulation of PCDD/Fs and PCBs in herring ( <i>Clupea harengus</i> L.) in the Northern Baltic Sea. | Mixtures of PCDD/Fs + DL-PCBs   | Herring                                        | TEQs.                                                                                            |
| <b>Nguyen Van et al. (2015).</b> Transport and bioaccumulation of polychlorinated dibenzo- <i>p</i> -dioxins and dibenzofurans at the Bien Hoa Agent Orange hotspot in Vietnam.                                           | Mixtures of PCDD/Fs             | Tilapia                                        | Transfer - follow-up of an incident (field study)                                                |
| <b>McLeod et al. (2014).</b> Effect of Season and Habitat on PCB Bioaccumulation by Caged Bluegill Sunfish Deployed in a Great Lakes Area of Concern.                                                                     | PCB-118                         | Bluegill Sunfish                               | Exposure via water and sediments. Accumulation.                                                  |
| <b>Johnson et al. (1996).</b> Dispersal and persistence of 2,3,7,8-tetrachlorodibenzo- <i>p</i> -dioxin (TCDD) in a contaminated aquatic ecosystem, Bayou Meto, Arkansas.                                                 | TCDD                            | bluegill, big-and smallmouth buffalo, crappies | No BCF calculated or similar.                                                                    |
| <b>Porte and Albaiges (1994).</b> Bioaccumulation patterns of hydrocarbons and polychlorinated-biphenyls in bivalves, crustaceans, and fishes.                                                                            | PCB-118                         | red mullet and tuna                            | ADME. Transfer - follow-up of an incident (field study)                                          |
| <b>Wu et al. (2009).</b> Biomagnification of polybrominated diphenyl ethers (PBDEs) and polychlorinated biphenyls in a highly contaminated freshwater food web from South China.                                          | PCB-105, -118, -157             | Fish                                           | Transfer - follow-up of an incident (field study).                                               |
| <b>Fisk et al. (2001).</b> Influence of chemical and biological factors on trophic transfer of persistent organic pollutants in the northwater polynya marine food web.                                                   | PCB-105, -118, -156             | Fish                                           | Field study, trophic transfer, includes DL-PCB-118 and -156                                      |
| <b>Fatemi et al. (2009).</b> Prediction of biomagnification factors for some organochlorine compounds using linear free energy relationship parameters and artificial neural networks.                                    | PCB-77, -105, 118, -126, -169   | Fish                                           | No original data, prediction of biomagnification factors for PCBs (includes 3 DL-PCBs)           |
| <b>Kobayashi et al. (2015).</b> Trophic magnification of polychlorinated biphenyls and polybrominated diphenyl ethers in an estuarine food web of the Ariake Sea, Japan.                                                  | PCB-118                         | Fish                                           | Transfer - follow-up of an incident (field study)                                                |
| <b>Kim et al. (2016).</b> Evaluating the roles of biotransformation, spatial concentration differences, organism home range, and field sampling design on trophic magnification factors.                                  | PCB-118                         | Fish                                           | Modelling. Transfer - follow-up of an incident (field study)                                     |
| <b>Buckman et al. (2006).</b> Biotransformation of polychlorinated biphenyls (PCBs) and bioformation of hydroxylated PCBs in fish.                                                                                        | PCB-105, -114, -118, -156, -167 | trout                                          | Food spiked with Aroclors but the congener specific analysis of PCB-105, -114, -118, -156, -167. |
| <b>Gewurtz et al. (2009).</b> Factors influencing trends of polychlorinated naphthalenes and other dioxin-like compounds in lake trout ( <i>Salvelinus namaycush</i> ) from Lake Ontario, North America (1979-2004).      | Mixtures of PCDD/Fs + DL-PCBs   | lake trout                                     | Field trial                                                                                      |

| Reference                                                                                                                                                                                                                | Compounds                                                         | Species                                                      | Comments                                                                                                                  |
|--------------------------------------------------------------------------------------------------------------------------------------------------------------------------------------------------------------------------|-------------------------------------------------------------------|--------------------------------------------------------------|---------------------------------------------------------------------------------------------------------------------------|
| <b>Allan et al. (2013).</b> <i>In vivo</i> passive sampling of nonpolar contaminants in brown trout ( <i>Salmo trutta</i> ).                                                                                             | PCB-118                                                           | trout                                                        | Field study                                                                                                               |
| <b>Wang et al. (2009).</b> Modelling the depuration rates of polychlorinated biphenyls in <i>Oncorhynchus mykiss</i> with quantum chemical descriptors.                                                                  | PCB-77, -81, -123, -126, -105, -114, -118, -169, -156, -157, -189 | trout                                                        | Depuration rates: PCB-77, -81, -123, -126, -105, -114, -118, -169, -156, -157, -189. Modelling, no original exposure data |
| <b>McLeod et al. (2015).</b> PCB Food Web Dynamics Quantify Nutrient and Energy Flow in Aquatic Ecosystems.                                                                                                              | PCB-118                                                           | trout                                                        | PCB-118 among other NDL-PCBs. Congener specific analysis and results.                                                     |
| <b>Niimi and Oliver (1986).</b> Biological half-lives of chlorinated dibenzo-p-dioxins and dibenzofurans in rainbow-trout ( <i>salmo-gairdneri</i> ).                                                                    | Individual PCDD/Fs                                                | rainbow trout                                                | Half-life DL-PCBs.                                                                                                        |
| <b>Hektoen et al. (1994).</b> Response of hepatic xenobiotic-metabolizing enzymes in rainbow-trout ( <i>oncorhynchus-mykiss</i> ) and cod ( <i>gadus-morhua</i> ) to 2,3,7,8-tetrachlorodibenzo-p-dioxin (2,3,7,8-TCDD). | TCDD                                                              | trout, cod                                                   | Distribution/metabolism. Whole body autoradiography of TCDD distribution and dynamics (enzyme induction)                  |
| <b>Gewurtz et al. (2006).</b> A comparison of contaminant dynamics in arctic and temperate fish: A modeling approach.                                                                                                    | Individual DL-PCBs                                                | lake trout and arctic char                                   | Modelling of PCBs. Includes only PCB-118                                                                                  |
| <b>Daley et al 2012).</b> Bioamplification and the selective depletion of persistent organic pollutants in Chinook salmon larvae.                                                                                        | PCB-118                                                           | salmon                                                       | ADME                                                                                                                      |
| <b>Daley et al. (2013).</b> The effect of food provisioning on persistent organic pollutant bioamplification in Chinook salmon larvae.                                                                                   | PCB-118                                                           | salmon                                                       | ADME. Data only given for PCB-180, only DL-PCB included was PCB-118                                                       |
| <b>Paterson et al. (2007).</b> Gordon, Drouillard, Kenneth G., Haffner, G. Douglas. PCB elimination by yellow perch ( <i>Perca flavescens</i> ) during an annual temperature cycle.                                      | PCB-118                                                           | yellow perch                                                 | Modelling. Elimination                                                                                                    |
| <b>Phua et al. (2007).</b> A new risk framework for predicting chemical residue(s) - Preliminary research for PCBs and PCDD/Fs in farmed Australian Southern Bluefin Tuna ( <i>Thunnus maccoyii</i> ).                   | Mixtures of PCDD/Fs + DL-PCBs                                     | Southern bluefish tuna                                       | Modelling                                                                                                                 |
| <b>Kobayashi et al. (2013).</b> Respiratory uptake kinetics of neutral hydrophobic organic chemicals in a marine benthic fish, <i>Pseudopleuronectes yokohamae</i> .                                                     | PCB-105, -114, -118, -156, -167                                   | Flounder                                                     | Fish exposed to water spiked with PCBs. Respiratory uptake of Arochlor.                                                   |
| <b>Barber et al. (1991).</b> Modeling bioaccumulation of organic pollutants in fish with an application to PCBs in lake-Ontario salmonids.                                                                               | PCB-77                                                            | Alewife, coho salmon, rainbow trout, brown trout, lake trout | PCB-77 (and non DL-PCB-153 and -155)                                                                                      |
| <b>Mehrtens and Laternus (1999).</b> Mixed function oxidase dependent biotransformation of polychlorinated biphenyls by different species of fish from the North Sea.                                                    | PCB-77                                                            | dab, plaice, cod                                             | Metabolism                                                                                                                |
| <b>Bytingsvik et al. (2015).</b> Current status, between-year comparisons and maternal transfer of organohalogenated                                                                                                     | PCB-105, -118                                                     | Arctic char                                                  | Muscle/ovary partition.                                                                                                   |



| Reference                                                                                                                                                                                                    | Compounds                            | Species | Comments                                                                    |
|--------------------------------------------------------------------------------------------------------------------------------------------------------------------------------------------------------------|--------------------------------------|---------|-----------------------------------------------------------------------------|
| compounds (OHCs) in Arctic char ( <i>Salvelinus alpinus</i> ) from Bjornoya, Svalbard (Norway).                                                                                                              |                                      |         |                                                                             |
| <b>Di Paolo et al. (2010)</b> . Black Carbon Inclusive Multichemical Modeling of PBDE and PCB Biomagnification and - Transformation in Estuarine Food Webs.                                                  | PCB-118                              | Fish    | Modelling                                                                   |
| <b>Burkhard et al. (2006)</b> . A hybrid empirical-mechanistic modeling approach for extrapolating biota-sediment accumulation factors and bioaccumulation factors across species, time, and/or ecosystems.  | PCB-118                              | Fish    | Modelling of PCBs (only DL PCB is PCB-118)                                  |
| <b>Fatemi and Chahi (2012)</b> . QSPR-based estimation of the half-lives for polychlorinated biphenyl congeners.                                                                                             | PCB-105, 114, -118, 156, -189        | Fish    | QSPR modelling of elimination of PCBs (includes 4 DL-PCBs)                  |
| <b>Laender et al. (2010)</b> . Seasonal PCB bioaccumulation in an arctic marine ecosystem: a model analysis incorporating lipid dynamics, food-web productivity and migration.                               | PCB-118                              | Fish    | Modelling of field data of ICES7                                            |
| <b>Xiao et al. (2015)</b> . Towards an improved understanding of processes controlling absorption efficiency and biomagnification of organic chemicals by fish.                                              | Individual target PCDD/Fs or DL-PCBs | Fish    | Modelling of uptake of dioxins and other organic Chemicals in rainbow trout |
| <b>Abbott et al. (1995)</b> . Pilot-scale validation of the river-fish bioaccumulation modelling program for nonpolar hydrophobic organic-compounds using the model compounds 2,3,7,8-TCDD and 2,3,7,8-TCDF. | TCDD, TCDF                           | Fish    | Model for field exposure to pollutants                                      |



## **ANNEX A.5. STUDIES IN RODENTS WITH EXPOSURE VALIDATED AND AT OR BELOW THE BENCHMARK CUT-OFF, PERFORMED WITH CONGENERS OR MIXTURES OTHER THAN TCDD**

The CONTAM Panel was asked to take into account not only studies with TCDD, but also other PCDD/Fs and DL-PCBs with assigned TEF-values. Therefore, initially studies on all these compounds showing effects on relevant end-points were selected, focussing on those with TEQ-based dose levels that could result in lower body burdens than those in the two critical studies with TCDD used by SCF (2001). However, at a later stage it was judged that such animal studies on other individual PCDD/Fs, DL-PCBs or mixtures would be less suitable than studies with TCDD. The issue is that TEFs are weighted factors based on a range of relative potencies and set to distinct values on a log scale to express an order of magnitude difference with the potency of TCDD rather than a very precise value. At best such a lower TEQ based reference point could be an argument to re-evaluate the TEFs. Nevertheless, the initially selected studies are described below as an example of studies which show effects at rather low TEQ-based levels.

Mated female Sprague Dawley rats ( $n = 8/\text{group}$ ) were dosed daily by gavage from GD13–19 with 0, 2.5, 25 or 250 ng PCB-126/kg bw (Wakui et al., 2010). At necropsy of the F1-males ( $n = 10/\text{group}$ ) after 7, 10, 13 or 17 weeks, no effect on body weight, relative testis and epididymes weights, serum testosterone, luteinizing hormone (LH) and follicle stimulating hormone (FSH) were observed. After 7, 10 and 13 weeks, the F1-males of the high-dose group showed increased rates of seminiferous tubules with step 19 spermatid retention. No other histopathological changes of the testis and number of Sertoli cells per seminiferous tubular were observed. Cauda epididymal sperm numbers were decreased in the high-dose group after 7, 10 and 13 weeks. After 17 weeks, cauda epididymal sperm numbers and testicular morphology were similar between the groups. This may point to a delay in development of the male animals of the high-dose group. The LOAEL of the study was 250 ng PCB-126/kg bw per day and the NOAEL was 25 ng PCB-126/kg bw per day. The LOAEL was based on inhibition of mature spermatid release and epididymal sperm counts, which were decreased at 7, 10 and 13 weeks. The CONTAM Panel noted that the study had some limitations. Reproductive data were not presented and therefore the CONTAM Panel could not judge the selection/randomisation of pups used for the F1-observations. Furthermore, body weights of F1-males during lactation until 7 weeks of age were not shown. The maternal NOAEL GD19 body burden was estimated to be 27 ng TEQ/kg bw, based on a WHO<sub>2005</sub>-TEF of 0.1.

Mated female Sprague Dawley rats ( $n = 5/\text{group}$ ) were dosed daily by gavage from GD13–19 with 0, 0.025, 2.5 or 250 ng PCB-126/kg bw per day or 7.5  $\mu\text{g}$  PCB-126/kg bw per day. F1-females ( $n = 10/\text{group}$ ) were analysed on PNDs 30 and 50 (Muto et al., 2003). No differences were seen between the groups in fecundity, pup mortality and pup weight apart from a 18% decrease in body weight in the female offspring of the high-dose group at PND30. Vaginal opening was delayed in the two highest dose groups and starting of oestrus cyclicity was delayed in all groups except the low-dose group as compared to the control. On PND50, serum 17 $\beta$ -oestradiol and progesterone levels were decreased in female rats of the  $\geq 2.5$  ng/kg bw/day groups. No malformations of the external genitalia were observed in any of the PCB-126-treated groups. No change in ovary weights was observed at PND30. On PND50, ovary weights of F1-females of the 7.5  $\mu\text{g}/\text{kg}$  bw per day group were decreased. Histopathology of endometrium and vagina was normal, while fewer antral follicles in the 2.5, 250 ng and 7.5  $\mu\text{g}$  PCB-126/kg bw per day groups were noted on PND30 and 50. Higher numbers of atretic follicles were observed in F1-females of the  $\geq 2.5$  ng/kg bw per day groups, relative to controls. The LOAEL of the study was 2.5 ng PCB-126/kg bw based on the delayed starting day of normal cyclicity, decreased number of antral follicles and increased number of atretic follicle number in the ovaria, and decreased estradiol and progesterone concentrations. The NOAEL of the study was 0.025 ng PCB-126/kg bw per day. The CONTAM Panel noted that the study had some limitations such as low number of pregnant females and F1-offspring used for observations. Reproductive data were not presented and therefore the CONTAM Panel could not judge the selection/randomisation of pups used for the F1-observations. Furthermore, there was no information on pup and body weight of F1-females during lactation but only on PND30. Several parameters

should be corrected for body weight. Due to these limitations this study was not further considered for body burden calculations.

Male and female Sprague Dawley rats were administered PCB-105 in the diet at 0.05, 0.5, 5 or 50 mg/kg diet (Chu et al., 1998). PCB-105 was synthesized according to the method of Bergman et al. (1990), and eluted through a charcoal/celite column as an additional purification step to remove possible impurities of coplanar PCB congeners. The purity reported was greater than 99.9%. The authors stated that the congener was free of chlorinated dibenzo-*p*-dioxins at detection levels below 1 µg by GC/MS analysis. Urine analysis was performed at 12 weeks and clinical chemistry at termination of the study at 13 weeks. Most statistically significant changes in organ weight and clinical chemistry were observed at the highest dose of 50 mg/kg diet including increased relative liver weight and decreased thymus weight. Significant changes in hepatocellular histopathology were observed at the higher doses but considered adaptive and although measured, no data were reported for liver function other than significant elevation of hepatic porphyrin levels, serum albumin and cholesterol, and increased urinary excretion of ascorbic acid at 50 mg/kg diet. This exposure was estimated by the authors as an average 4,327 and 3,960 µg PCB-105 ingested/kg bw per day for males and females, respectively. At these dose levels, changes (not dose-related) in brain biogenic amines were detected in both sexes. A NOEL for PCB-105 of 0.05 mg/kg diet was concluded, equal to 3.9 and 4.2 µg/kg bw per day, for males and females, respectively. However, based on thymus involution weight in both sexes and reduced cortical volume in females, a NOAEL of 0.5 mg PCB-105/kg diet was estimated. At the end of the exposure period the NOAEL body burden was estimated to be 40 ng TEQ/kg bw, based on the WHO<sub>2005</sub>-TEF of 0.00003.

Pregnant Long-Evans (n = 15/group) were exposed to a mixture 0, 0.05, 0.2, 0.8 or 1.0 µg TEQ/kg bw by gavage on GD15. The TEQ mixture was composed as follows: TCDD + PeCDD + TCDF + 1,2,3,7,8-PeCDF + 2,3,4,7,8-PeCDF + OCDF + PCB-77 + PCB-126 + PCB-169 (Hamm et al. (2003)). An additional study (n = 15/group) was performed with 0 and 2.0 µg TEQ/kg bw. Pup mortality was observed in the 2.0 µg TEQ/kg bw group. The three highest dose groups showed a delay in vaginal opening and preputial separation. However, the differences were small and the relation to body weights was not described. Weight of the seminal vesicles and prostate was decreased from 0.2 µg TEQ/kg bw and higher (data presented for only 5–7 males) on PND 32 and PND 49, respectively. This effect was only observed on PND 49 and PND 63 in the 2.0 µg/kg bw group for the seminal vesicles and on PND 63 in the 2.0 µg/kg bw for the seminal vesicles (absolute and relative). On PND 63, a decrease in sperm counts was observed in all treated groups. Observations were made in 8–10 animals selected from different litters. A NOAEL for this effect was not detected. Permanent vaginal threads (n = 10+) were observed in the 0.2 µg TEQ/kg bw group and higher and cleft phallus in the 2.0 µg TEQ/kg bw group (n = 10+). The CONTAM Panel considered 0.05 µg TEQ/kg bw as the LOAEL based on the decreased sperm counts. The CONTAM Panel noted that the randomisation/selection of the F0- and F1-animals was not described. A LOAEL GD15 body burden of 78 ng TEQ/kg bw was calculated.

Sprague Dawley rats (20/sex/group) were initially dosed by gavage with 4 daily loading doses followed by 6 biweekly maintenance doses of five different mixtures consisting of TCDD, PeCDD, 1,2,3,4,7,8-HxCDD and HpCDD (TEQ value for males 0.22, 2.59, 15.6, 46.7 or 70 µg TEQ/kg bw and for females 0.14, 1.73, 10.4, 31.1 or 46.7 µg TEQ/kg bw for groups 2, 3, 4, 5 or 6, respectively) (Viluksela et al., 1998a,b). Group 1 was the vehicle control group and group 7 was dosed with PeCDD (males 70 and females 46.7 µg TEQ/kg bw) and group 8 was dosed with HxCDD (males 70 and females 46.7 µg TEQ/kg bw). Half of the rats were necropsied after the 13-week dosing period and the other half after an additional period of 13-week off-dose. Body weights were decreased in group 5-8 in both sexes. In addition, mortality due to wasting, haemorrhage and anaemia was increased in groups 5-8 (Viluksela et al., 1998a). The biochemical markers were described in Viluksela et al. (1998b). EROD activity was dose-relatedly increased with a maximum in group 4. Serum glucose concentrations were increased in groups 5–8 in males and in groups 4-8 in females. Serum T3 levels were significantly affected. Serum T4 levels were affected in the three highest dose levels of the mixture (groups 4, 5 and 6) and in the PeCDD and HxCDD groups (groups 7 and 8). The NOAEL of this study for males was 15.6 µg TEQ/kg bw and for females 10.4 µg TEQ/kg bw (group 3). The dosing schedule was chosen such that during the entire exposure period a near 'steady-state' was achieved for all of the mixture components. At the end of the exposure period this near 'steady-state'

was revealed by measuring each of the mixture component's hepatic concentration. For the lowest dose tested this resulted in a body burden of 484 ng TEQ/kg bw in male, and 428 ng TEQ/kg bw in female animals.

Crofton et al. (2005) exposed rats for 4 days to a mixture of 18 different polyhalogenated aromatic hydrocarbons (2 PCDDs, 4 PCDFs and 12 PCBs, including DL- and NDL-PCBs). On the day following the last dose, (total) serum T4 was measured. Tested doses were 1.2, 4.2, 12, 42, 83 and 125 ng TEQ/kg/day. The study does not provide a BMD(L). However, the dose-response suggests a BMD(L)<sub>5</sub> to lie between 4.2 and 12 ng TEQ/kg bw/day. Given the 4-day exposure duration of this study the corresponding body burden at the end of the exposure period is expected to lie between  $4 \times 0.5 \times 4.2 = 8.4$  ng TEQ/kg bw, respectively  $4 \times 0.5 \times 12 = 24$  ng TEQ/kg bw. These body burdens are lower than the one used by SCF for calculating its HBGV, i.e. a LOAEL body burden of 40 ng/kg bw, a NOAEL body burden of 20 ng/kg bw.

## ANNEX A.6. STUDIES IN EXPERIMENTAL ANIMALS (RODENTS AND PRIMATES)

### A.6.1. Studies in rodents

**Table 55.** Overview of the rat studies retrieved in the literature search in which exposure was validated

| <b>Studies with exposure levels at or below the intake cut-off<sup>(a)</sup></b>                                                                                                                          |                                                                |
|-----------------------------------------------------------------------------------------------------------------------------------------------------------------------------------------------------------|----------------------------------------------------------------|
| <b>Bell et al. (2007a).</b> Toxicity of 2 TCDD in the developing male Wistar(Han) rat. I: No decrease in epididymal sperm count after a single acute dose                                                 | TCDD                                                           |
| <b>Bell et al. (2007b).</b> Toxicity of TCDD in the developing male Wistar(Han) rat. II: Chronic dosing causes developmental delay                                                                        | TCDD                                                           |
| <b>Harrill et al. (2016).</b> AHR knockout rats are insensitive to the pathological effects of repeated oral exposure to TCDD                                                                             | TCDD                                                           |
| <b>Jämsä et al. (2001).</b> Effects of 2,3,7,8-tetrachlorodibenzo- <i>p</i> -dioxin on bone in two rat strains with different aryl hydrocarbon receptor structures                                        | TCDD                                                           |
| <b>Nohara et al. (2000).</b> The effects of perinatal exposure to low doses of 2,3,7,8-tetrachlorodibenzo- <i>p</i> -dioxin on immune organs in rats                                                      | TCDD                                                           |
| <b>Rebourcet et al. (2010).</b> The effects of an in utero exposure to 2,3,7,8-tetrachlorodibenzo- <i>p</i> -dioxin on male reproductive function: identification of Ccl5 as a potential marker           | TCDD                                                           |
| <b>Rowlands et al. (2006).</b> Sex ratio of the offspring of Sprague-Dawley rats exposed to TCDD in utero and lactationally in a three-generation study                                                   | TCDD<br><i>No effect. No NOAEL identified</i>                  |
| <b>Viluksela et al. (2000).</b> Liver tumor-promoting activity of TCDD in TCDD-sensitive and TCDD-resistant rat strains                                                                                   | TCDD                                                           |
| <b>Phadnis-Moghe et al. (2016).</b> Immunological characterization of the aryl hydrocarbon receptor (AHR) knockout rat in the presence and absence of 2,3,7,8-tetrachlorodibenzo- <i>p</i> -dioxin (TCDD) | TCDD                                                           |
| <b>Wakui et al. (2010).</b> Testicular spermiation failure in rats exposed prenatally to 3,3',4,4',5-pentachlorobiphenyl                                                                                  | PCB-126                                                        |
| <b>Muto et al. (2003).</b> Estrous cyclicity and ovarian follicles in female rats after prenatal exposure to 3,3',4,4',5-pentachlorobiphenyl                                                              | PCB-126                                                        |
| <b>Wu et al. (2016).</b> 3,3',4,4',5-Pentachlorobiphenyl (PCB 126) Decreases Hepatic and Systemic Ratios of Epoxide to Diol Metabolites of Unsaturated Fatty Acids in Male Rats                           | PCB-126                                                        |
| <b>Chu et al. (1998).</b> Subchronic toxicity of PCB 105 (2,3,3',4,4'-pentachlorobiphenyl) in rats                                                                                                        | PCB-105                                                        |
| <b>Hamm et al. (2003).</b> A mixture of dioxins, furans, and non-ortho PCBs based upon consensus toxic equivalency factors produces dioxin-like reproductive effects                                      | TEQ mixture                                                    |
| <b>Viluksela et al. (1998a).</b> Subchronic/chronic toxicity of a mixture of four chlorinated dibenzo- <i>p</i> -dioxins in rats - I. Design, general observations, hematology, and liver concentrations  | TEQ mixture                                                    |
| <b>Viluksela et al. (1998b).</b> Subchronic/chronic toxicity of a mixture of four chlorinated dibenzo- <i>p</i> -dioxins in rats - II. Biochemical effects                                                | TEQ mixture                                                    |
| <b>Crofton et al. (2005).</b> Thyroid-hormone-disrupting chemicals: Evidence for dose-dependent additivity or synergism                                                                                   | TCDD, PeCDD, other individual, mixture                         |
| <b>Brix et al. (2004).</b> Characterization of bronchiolar metaplasia of the alveolar epithelium in female Sprague-Dawley rats exposed to 3,3',4,4',5-pentachlorobiphenyl (PCB126)                        | <i>Based on NTP study</i><br>PCB-126                           |
| <b>Nyska et al. (2004).</b> Exocrine pancreatic pathology in female Harlan Sprague-Dawley rats after chronic treatment with 2,3,7,8-tetrachlorodibenzo- <i>p</i> -dioxin and dioxin-like compounds        | <i>Based on NTP study</i><br>TCDD, PCB-126, PeCDF, TEQ mixture |
| <b>Nyska et al. (2005).</b> Olfactory epithelial metaplasia and hyperplasia in female Harlan Sprague-Dawley rats following chronic treatment with polychlorinated biphenyls                               | <i>Based on NTP study</i><br>TCDD, PCB-126, PeCDF, TEQ mixture |
| <b>Walker et al. (2005).</b> Dose-additive carcinogenicity of a defined mixture of "dioxin-like compounds"                                                                                                | <i>Based on NTP study</i><br>TCDD, PCB-126, PeCDF, TEQ mixture |
| <b>Yoshizawa et al. (2005).</b> Gingival carcinogenicity in female Harlan Sprague-Dawley                                                                                                                  | <i>Based on NTP study</i>                                      |

| <b>Studies with exposure levels at or below the intake cut-off <sup>(a)</sup></b>                                                                                                                                                                                                    |                                                                         |
|--------------------------------------------------------------------------------------------------------------------------------------------------------------------------------------------------------------------------------------------------------------------------------------|-------------------------------------------------------------------------|
| rats following two-year oral treatment with TCDD and dioxin-like compounds                                                                                                                                                                                                           | TCDD, PCB-126, PeCDF, TEQ mixture                                       |
| <b>Walker et al. (2006).</b> Comparison of chronic toxicity and carcinogenicity of TCDD in 2-year bioassays in female Sprague-Dawley rats                                                                                                                                            | <i>Based on NTP study</i><br>TCDD                                       |
| <b>Walker et al. (2007).</b> Pulmonary lesions in female Harlan Sprague-Dawley rats following two-year oral treatment with dioxin-like compounds                                                                                                                                     | <i>Based on NTP study</i><br>TCDD, PCB-126, PeCDF, TEQ mixture          |
| <b>Yoshizawa et al. (2009).</b> Reproductive Lesions in Female Harlan Sprague-Dawley Rats Following Two-Year Oral Treatment with Dioxin and Dioxin-like Compounds                                                                                                                    | <i>Based on NTP study</i><br>TCDD, PCB-126, PeCDF, PCB-118, TEQ mixture |
| <b>Yoshizawa et al. (2010).</b> Thyroid Follicular Lesions Induced by Oral Treatment for 2 Years with TCDD and Dioxin-like Compounds in Female Harlan Sprague-Dawley Rats                                                                                                            | <i>Based on NTP study</i><br>TCDD, PCB-126, PeCDF, PCB-118, TEQ mixture |
| <b>Hassoun et al. (2001).</b> Production of superoxide anion, lipid peroxidation and DNA damage in the hepatic and brain tissues of rats after subchronic exposure to mixtures of TCDD and its congeners                                                                             | <i>Based on NTP study</i><br>TEQ mixture                                |
| <b>Studies with exposure levels above the intake cut-off</b>                                                                                                                                                                                                                         |                                                                         |
| <b>Kransler et al. (2007a).</b> Comparative developmental toxicity of TCDD in the hamster, rat and guinea pig                                                                                                                                                                        | TCDD                                                                    |
| <b>Kransler et al. (2007b).</b> Gestational exposure to TCDD alters retinoid homeostasis in maternal and perinatal tissues of the Holtzman rat                                                                                                                                       | TCDD                                                                    |
| <b>Kransler et al. (2008).</b> Effects of Helicobacter infection on developmental toxicity of TCDD in Holtzman rats                                                                                                                                                                  | TCDD                                                                    |
| <b>Kransler et al. (2009).</b> Lung Development in the Holtzman Rat is Adversely Affected by Gestational Exposure to 2,3,7,8-Tetrachlorodibenzo- <i>p</i> -Dioxin                                                                                                                    | TCDD                                                                    |
| <b>Tuomisto et al. (2000).</b> Changes in food intake and food selection in rats after TCDD exposure                                                                                                                                                                                 | TCDD                                                                    |
| <b>Nishimura et al. (2001).</b> Induction of metallothionein in the livers of female Sprague-Dawley rats treated with TCDD                                                                                                                                                           | TCDD                                                                    |
| <b>Nishimura et al. (2002).</b> Immunohistochemical localization of thyroid stimulating hormone induced by a low oral dose of TCDD in female Sprague-Dawley rats                                                                                                                     | TCDD                                                                    |
| <b>Nishimura et al. (2003).</b> Rat thyroid hyperplasia induced by gestational and lactational exposure to TCDD                                                                                                                                                                      | TCDD                                                                    |
| <b>Ishimura et al. (2002).</b> Increased glycogen content and glucose transporter 3 mRNA level in the placenta of Holtzman rats after exposure to TCDD                                                                                                                               | TCDD                                                                    |
| <b>Shirota et al. (2007).</b> Internal dose-effects of TCDD in gonadotropin-primed weanling rat model                                                                                                                                                                                | TCDD                                                                    |
| <b>Kakeyama et al. (2003).</b> Perinatal exposure to 2 TCDD alters activity-dependent expression of BDNF mRNA in the neocortex and male rat sexual behavior in adulthood                                                                                                             | TCDD                                                                    |
| <b>Fletcher et al. (2001).</b> Hepatic vitamin A depletion is a sensitive marker of TCDD exposure in four rodent species                                                                                                                                                             | TCDD                                                                    |
| <b>Fattore et al. (2000).</b> Relative potency values derived from hepatic vitamin A reduction in male and female Sprague-Dawley rats following subchronic dietary exposure to individual polychlorinated dibenzo- <i>p</i> -dioxin and dibenzofuran congeners and a mixture thereof | TCDD, 2,3,4,7,8-PeCDF                                                   |
| <b>Faqi et al. (1998a).</b> Reproductive toxicity and tissue concentrations of PCB 77 in male adult rats                                                                                                                                                                             | PCB-77                                                                  |
| <b>Rice (1999).</b> Effect of exposure to PCB 126 throughout gestation and lactation on development and spatial delayed alternation performance in rats                                                                                                                              | PCB-126                                                                 |
| <b>Rice and Hayward (1998).</b> Lack of effect of PCB 126 throughout gestation and lactation on multiple fixed interval fixed ratio and DRL performance in rats                                                                                                                      | PCB-126                                                                 |
| <b>Rice and Hayward (1999).</b> Effects of exposure to PCB 126 throughout gestation and lactation on behavior (concurrent random interval-random interval and progressive ratio performance) in rats                                                                                 | PCB-126                                                                 |
| <b>Shimada et al. (2015).</b> Absorption of PCB126 by upper airways impairs G protein-coupled receptor-mediated immune response                                                                                                                                                      | PCB-126                                                                 |
| <b>Fisher et al. (2006).</b> Effect of PCB 126 on hepatic metabolism of thyroxine and perturbations in the hypothalamic-pituitary-thyroid axis in the rat                                                                                                                            | PCB-126                                                                 |
| <b>Studies used in the previous SCF (2000, 2001) assessment</b>                                                                                                                                                                                                                      |                                                                         |



| <b>Studies with exposure levels at or below the intake cut-off <sup>(a)</sup></b>                                                                                                                                                                                                                                                     |                                                                                                                              |
|---------------------------------------------------------------------------------------------------------------------------------------------------------------------------------------------------------------------------------------------------------------------------------------------------------------------------------------|------------------------------------------------------------------------------------------------------------------------------|
| <b>Faqi et al. (1998b).</b> reproductive toxicity and tissue concentrations of low doses of 2,3,7,8-tetrachlorodibenzo- <i>p</i> -dioxin in male offspring rats exposed throughout pregnancy and lactation                                                                                                                            | TCDD                                                                                                                         |
| <b>Ohsako et al. (2001).</b> Maternal exposure to a low dose of 2378-tetrachlorodibenzo- <i>p</i> -dioxin (TCDD) suppressed the development of reproductive organs of male rats: dose-dependent increase of mRNA levels of 5 $\alpha$ -reductase type 2 in contrast to decrease of androgen receptor in the pubertal ventral prostate | TCDD                                                                                                                         |
| <b>Studies not considered in the risk assessment for the reason indicated</b>                                                                                                                                                                                                                                                         |                                                                                                                              |
| <b>Boverhof et al. (2006).</b> Comparative toxicogenomic analysis of the hepatotoxic effects of TCDD in Sprague Dawley rats and C57BL/6 mice                                                                                                                                                                                          | TCDD<br><i>Ovariectomized animals</i>                                                                                        |
| <b>Herlin et al. (2010).</b> Quantitative characterization of changes in bone geometry, mineral density and biomechanical properties in two rat strains with different Ah-receptor structures after long-term exposure to 2,3,7,8-tetrachlorodibenzo- <i>p</i> -dioxin                                                                | TCDD<br><i>Hepatectomised animals</i>                                                                                        |
| <b>Bell et al. (2007c).</b> Relationships between tissue levels of 2,3,7,8-tetrachlorodibenzo- <i>p</i> -dioxin (TCDD), mRNAs, and toxicity in the developing male wistar(han) rat                                                                                                                                                    | TCDD<br><i>Only levels.</i><br><i>No toxicity study</i>                                                                      |
| <b>Hurst et al. (2000).</b> Acute administration of 2,3,7,8-tetrachlorodibenzo- <i>p</i> -dioxin (TCDD) in pregnant Long Evans rats: Association of measured tissue concentrations with developmental effects                                                                                                                         | TCDD<br><i>Reassessment of previous studies</i>                                                                              |
| <b>Kawakami et al. (2006).</b> Differential susceptibilities of Holtzman and Sprague-Dawley rats to fetal death and placental dysfunction induced by TCDD despite the identical primary structure of the AHR                                                                                                                          | TCDD<br><i>Not eligible endpoint</i>                                                                                         |
| <b>Hailey et al. (2005).</b> Classification of proliferative hepatocellular lesions in Harlan Sprague-Dawley rats chronically exposed to dioxin-like compounds                                                                                                                                                                        | TCDD<br><i>No endpoint (kinetic study)</i>                                                                                   |
| <b>Dean et al. (2002).</b> Nonadditive hepatic tumor promoting effects by a mixture of two structurally different polychlorinated biphenyls in female rat livers                                                                                                                                                                      | PCB-126<br><i>Not eligible endpoint</i>                                                                                      |
| <b>van der Plas et al. (1999).</b> Induction of altered hepatic foci by a mixture of dioxin-like compounds with and without 2,2',4,4',5,5'-hexachlorobiphenyl in female Sprague-Dawley rats                                                                                                                                           | TEQ mixture<br><i>Explanatory study not fit as a basis for risk assessment. The study aimed at exploring the TEQ concept</i> |
| <b>Desaulniers et al. (2003).</b> Effects of postnatal exposure to mixtures of non-ortho-PCBs, PCDDs, and PCDFs in prepubertal female rats                                                                                                                                                                                            | TEQ Mixture                                                                                                                  |
| <b>Croutch et al 2005.</b> TCDD and 1,2,3,4,7,8-HxCDD alter body weight by decreasing insulin-like growth factor I (IGF-I) signalling                                                                                                                                                                                                 | TCDD, HxCDD<br><i>Loading plus maintenance dosing not clearly described.</i>                                                 |

(a): The CONTAM Panel decided to select from the retrieved literature only studies with effects considered relevant and occurring at body burdens at or below those estimated for the NOAEL in the study by Ohsako et al. (2001) of 20 ng/kg bw, or for the LOAEL in the study by Faqi et al. (1998) of 40 ng/kg bw. To select such studies, it was decided to apply a (screening) 'body burden cut-off' of 100 ng/kg bw. So all retrieved studies in which either a single dose, or repeated doses could lead to a body burden at or below 100 ng/kg bw were selected. In rodents a body burden of 100 ng/kg bw is expected after chronic gavage dosing of 10 ng/kg bw per day, therefore selected as the chronic intake cut-off value. In a similar way, intake cut-off values for less than subacute, subacute and subchronic exposure duration were developed and used for screening such studies. For more details see Section 3.1.2.1).

**Table 56.** Toxicity studies performed in rats administered TCDD retrieved by the literature search, in which exposure was validated and the external dose was at or below the intake cut-off. Details about the risk of bias appraisal can be found in Annex A.7

| Reference                                                                                                                                                                 | Species<br>Compound(s)<br>Dose regime<br>Study type<br>Route admin                                                                                                                                                                                                                                                                                                                                                                                                                                                                                                                                                                                                                 | Parameters measured and measures of effects                                                                                                                                                                                                                                                                                                                                                                                                                                                                                                                                                                                                                                                                                                                                                                                                                                                                                                                                                                                                                                                                                                                                                                                                                                                                                                                                                                                                                                                                                                                                                                                   | NOAEL and/or LOAEL<br><br>Risk of bias tier                                                                                                                                                                                                                                                                                                                                                                         |
|---------------------------------------------------------------------------------------------------------------------------------------------------------------------------|------------------------------------------------------------------------------------------------------------------------------------------------------------------------------------------------------------------------------------------------------------------------------------------------------------------------------------------------------------------------------------------------------------------------------------------------------------------------------------------------------------------------------------------------------------------------------------------------------------------------------------------------------------------------------------|-------------------------------------------------------------------------------------------------------------------------------------------------------------------------------------------------------------------------------------------------------------------------------------------------------------------------------------------------------------------------------------------------------------------------------------------------------------------------------------------------------------------------------------------------------------------------------------------------------------------------------------------------------------------------------------------------------------------------------------------------------------------------------------------------------------------------------------------------------------------------------------------------------------------------------------------------------------------------------------------------------------------------------------------------------------------------------------------------------------------------------------------------------------------------------------------------------------------------------------------------------------------------------------------------------------------------------------------------------------------------------------------------------------------------------------------------------------------------------------------------------------------------------------------------------------------------------------------------------------------------------|---------------------------------------------------------------------------------------------------------------------------------------------------------------------------------------------------------------------------------------------------------------------------------------------------------------------------------------------------------------------------------------------------------------------|
| <b>Viluksela et al. (2000).</b><br>Liver tumor-promoting activity of 2,3,7,8-tetrachlorodibenzo- <i>p</i> -dioxin (TCDD) in TCDD-sensitive and TCDD-resistant rat strains | Han/Wistar, Long-Evans<br><br>TCDD<br><br>Cumulative doses of 0.17, 1.7, 17, 170 µg/kg via loading doses of 0.035, 0.35, 3.5 and 35 ng/kg bw/day, followed by weekly maintenance doses of 0.007, 0.07, 0.7 and 7 ng/kg bw/day, respectively.<br><br>Rats received loading dose in week 1, and maintenance doses for the remaining 19 weeks.<br><br>Calculated daily doses: 1, 10, 100, 1,000 ng/kg bw/day, respectively.<br><br>A satellite H/W group received a cumulative dose of 1,700 µg/kg as a single <i>s.c.</i> injection or via a loading dose of 350 µg/kg, following by weekly loading doses of 70 µg/kg.<br><br>Chronic (20 weeks)<br><br>Subcutaneous ( <i>s.c.</i> ) | <b>Body weight and mortality.</b> Body weight gain dose dependently decreased in LE rats and H/W rats at $\geq 1.7$ and $\geq 17$ µg/kg, respectively.<br><b>Organ weights.</b> Body weight related liver weights dose-dependently increased in both strains, and statistically significant at 1.7 and 17 µg/kg for LE and H/W rats, respectively. Dose-dependently decreased bw-related thymus weights in both rat strains, and for both H/W and L-E rats statistically significant at 17 µg/kg.<br><b>Quantitative stereology of GST-P-positive hepatic foci.</b> No foci detected in untreated -/- control rats of H/W and LE rats. Dose-dependently increase in the number of GST-P-positive foci in both rats H/W and LE strains.<br><b>Liver histopathology.</b> Altered hepatic foci in LE rats at 1.7 and 17 µg/kg and in comparably treated H/W rats at 170 and 1,700 µg/kg. Changes characteristic of TCDD-induced liver toxicity at 17 µg/kg in L-E rats and at $\geq 17$ µg/kg in H/W rats. These changes induced inflammatory and/or necrotic foci, fibrosis, multinucleated hepatocytes, cytoplasmic vacuolisation, bile duct dilation, bile duct hyperplasia and extramedullary hematopoiesis.<br><b>Plasma enzyme activities.</b> ALAT and ASAT activities elevated in exposed rats. L-E were more sensitive than H/W rats, exhibiting increased plasma enzyme activities at 1.7 and 17 µg/kg, whereas H/W rats typically responded at 170 µg/kg.<br><b>Micronucleated erythrocytes in bone marrow and peripheral blood.</b> Tendency for MNPCE and MNRET to increase (only significant in H/W at 170 µg/kg). | Long-Evans ( <i>Turku/AB</i> ) rats:<br><b>NOAEL= 1 ng/kg bw/day</b><br>Based on increased liver weight and AST and increased incidence of histopathological findings in the liver.<br>Han Wistar rats:<br><b>NOAEL=100 ng/kg bw/day</b><br>Based on decreased body weight gain, increase relative liver weight and decrease in thymus weight, and histopathological findings in the liver.<br>Risk of bias tier: 2 |
| <b>Jämsä et al. (2001).</b> Effects                                                                                                                                       | Han/Wistar and Long-Evans                                                                                                                                                                                                                                                                                                                                                                                                                                                                                                                                                                                                                                                          | <b>Body weight and Mortality.</b> No deaths during the study. Significant                                                                                                                                                                                                                                                                                                                                                                                                                                                                                                                                                                                                                                                                                                                                                                                                                                                                                                                                                                                                                                                                                                                                                                                                                                                                                                                                                                                                                                                                                                                                                     | <b>NOAEL= 1 ng/kg bw/day</b>                                                                                                                                                                                                                                                                                                                                                                                        |



| Reference                                                                                                                                                                                   | Species<br>Compound(s)<br>Dose regime<br>Study type<br>Route admin                                                                                                                                                                                                                                                                                                                                                                          | Parameters measured and measures of effects                                                                                                                                                                                                                                                                                                                                                                                                                                                                                                                                                                                                                                                                                                                                                                                                                                                                                                                                                                                                                                                                                                                                                                                                                                                                                                                                                | NOAEL and/or LOAEL<br><br>Risk of bias tier                                                                                                                                                                     |
|---------------------------------------------------------------------------------------------------------------------------------------------------------------------------------------------|---------------------------------------------------------------------------------------------------------------------------------------------------------------------------------------------------------------------------------------------------------------------------------------------------------------------------------------------------------------------------------------------------------------------------------------------|--------------------------------------------------------------------------------------------------------------------------------------------------------------------------------------------------------------------------------------------------------------------------------------------------------------------------------------------------------------------------------------------------------------------------------------------------------------------------------------------------------------------------------------------------------------------------------------------------------------------------------------------------------------------------------------------------------------------------------------------------------------------------------------------------------------------------------------------------------------------------------------------------------------------------------------------------------------------------------------------------------------------------------------------------------------------------------------------------------------------------------------------------------------------------------------------------------------------------------------------------------------------------------------------------------------------------------------------------------------------------------------------|-----------------------------------------------------------------------------------------------------------------------------------------------------------------------------------------------------------------|
| of 2,3,7,8-tetrachlorodibenzo- <i>p</i> -dioxin on bone in two rat strains with different aryl hydrocarbon receptor structures                                                              | <p>(Turku/AB)</p> <p>TCDD</p> <p>Cumulative doses of 0.17, 1.7, 17, 170 µg TCDD/kg via loading doses of 0.035, 0.35, 3.5 and 35 µg/kg bw/day, followed by weekly maintenance doses of 0.007, 0.07, 0.7, 7 µg/kg bw/day. Animals received the loading dose in week 1, and maintenance doses for the remaining 19 weeks. Calculated daily doses: 1, 10, 100, 1000 ng TCDD/kg bw/day.</p> <p>Chronic (20 weeks)</p> <p>Subcutaneous (s.c.)</p> | <p>impairment of body weight at the highest dose in each strain (P&lt;0.001). LE rats more sensitive than H/W rats: at 17 µg TCDD/kg, body weight gain of LE rats was 63.3% of controls, while for H/W rats it was 82.6%, which was not statistically significant. At 170 µg/kg, H/W rats body weight gain significantly reduced (49.9%). LE rats considered to be 10-fold more sensitive to impaired body weight development than H/W rats.</p> <p><b>Tibial length, geometry and density.</b> Decreased tibial length in LE rats at ≥17 µg/kg. Effects only seen in H/W rats at the high dose. Dose-dependent decrease in bone cross-sectional size, which was present in LE rats from 1.7 µg/kg. Reduction in bone size accompanied by a reduction in ash weight.</p> <p><b>Mechanical properties.</b> The three-point bending breaking force of the tibia reduced in H/W rats at 170 µg TCDD/kg (p&lt;0.05) and at 17 µg TCDD/kg in LE rats. Reduction in breaking force accompanied by a dose-dependent decrease in bending stiffness (p&lt;0.01).</p> <p><b>Histology.</b> No significant changes in TBV in H/W rats. Significant reduction in TBV in LE rats at 17 µg/kg) (p&lt;0.05).</p> <p><b>Biochemical analysis (ALP activity).</b> Plasma ALP activities dose-dependently and significantly increased in LE rats at 1.7 or 17 µg/kg, and in H/W rats at 17 or 170 µg/kg.</p> | <p>Based on decreased tibia length, tibia geometry parameters, tibia ash weight, and increased plasma ALP activity (calculated dose based on loading dose + maintenance scheme)</p> <p>Risk of bias tier: 2</p> |
| <b>Harrill et al. (2016).</b> Aryl hydrocarbon receptor knockout rats are insensitive to the pathological effects of repeated oral exposure to 2,3,7,8-tetrachlorodibenzo- <i>p</i> -dioxin | <p>Sprague-Dawley</p> <p>TCDD</p> <p>Wildtype AhR rats administered with 0, 3, 22, 100, 300, 1,000 ng/kw bw per day 4-5 days per week, for 4-weeks from PND56 ± 4 (total of 19 doses).</p> <p>Sub-acute (28 days)</p> <p>Oral: Gavage</p>                                                                                                                                                                                                   | <p><b>Body weights.</b> At 1,000 ng/kg bw/day inhibited body weight gain.</p> <p><b>Tissues weights.</b> Dose-dependent increase in the liver-to-body weight % and a dose-dependent decrease in the thymus-to-body weight percentage. Doses ranging from 22 to 1,000 ng/kg bw/day increased liver-to body weight % compared with the control. Doses ranging from 300 to 1,000 ng/kg bw/day decreased thymus-to-body weight %.</p> <p>Significant decrease in spleen-to-body weight % observed at 1,000 ng TCDD/kg bw/day as compared to controls.</p> <p><b>Serum chemistry.</b> Dose-dependent increase in serum ALP, AST, TBIL, TBA, TP, GLOB and CHOL. Dose-dependent decrease in TRIG and GLUC.</p> <p><b>Hematology.</b> Dose-dependent increase in RBC count, HB, HCT and a dose-dependent decrease in MCV, MCH and PLT.</p> <p><b>Histopathology.</b> Dose-related in severity and observed in groups</p>                                                                                                                                                                                                                                                                                                                                                                                                                                                                           | <p><b>NOAEL = 100 ng/kg bw/day</b></p> <p>Based on bile duct hyperplasia and thymus atrophy</p> <p>Risk of bias tier: 1</p>                                                                                     |

| Reference                                                                                                                                                                                                 | Species<br>Compound(s)<br>Dose regime<br>Study type<br>Route admin                                                                                                                                                                                                                                                                                | Parameters measured and measures of effects                                                                                                                                                                                                                                                                                                                                                                                                                                                                                                                                                                                                                                                                                                                                                                                                                                                                                                                                                                                                     | NOAEL and/or LOAEL<br><br>Risk of bias tier                                                                         |
|-----------------------------------------------------------------------------------------------------------------------------------------------------------------------------------------------------------|---------------------------------------------------------------------------------------------------------------------------------------------------------------------------------------------------------------------------------------------------------------------------------------------------------------------------------------------------|-------------------------------------------------------------------------------------------------------------------------------------------------------------------------------------------------------------------------------------------------------------------------------------------------------------------------------------------------------------------------------------------------------------------------------------------------------------------------------------------------------------------------------------------------------------------------------------------------------------------------------------------------------------------------------------------------------------------------------------------------------------------------------------------------------------------------------------------------------------------------------------------------------------------------------------------------------------------------------------------------------------------------------------------------|---------------------------------------------------------------------------------------------------------------------|
|                                                                                                                                                                                                           |                                                                                                                                                                                                                                                                                                                                                   | treated with 22 ng/kg bw/day and higher in the liver and groups treated with 300 ng/kg bw/day and higher in the thymus. In the liver, dose-related increased severity of hepatocellular vacuolation consistent with fatty change and inflammatory cell foci. Hepatocellular hypertrophy of moderate degree at 1,000 ng/kg bw/day and of mild degree from 22-300 ng/kg bw/day. Histopathology changes indicative of thymic atrophy observed at 300 and 1,000 ng/kg bw/day. Changes included a loss of cellularity in the cortex of the thymus.                                                                                                                                                                                                                                                                                                                                                                                                                                                                                                   |                                                                                                                     |
| <b>Phadnis-Moghe et al. (2016).</b> Immunological characterization of the aryl hydrocarbon receptor (AHR) knockout rat in the presence and absence of 2,3,7,8-tetrachlorodibenzo- <i>p</i> -dioxin (TCDD) | Sprague Dawley<br><br>TCDD<br><br>Oral gavage<br><br>0, 3, 22, 100, 300, 1,000 ng/kg/day, 4 weeks (5days per week)                                                                                                                                                                                                                                | In wild type animals, lymphocyte subpopulations were influenced, suppression of the percentage of LPS-induced IgM+ cells, yet an increment of (ex vivo LPS-induced) proliferation, indicating in a dysregulation of the humoral immune response with an effect level in the wild type animals of 100 ng/kg. Also the NK percentage decreased at this dose.                                                                                                                                                                                                                                                                                                                                                                                                                                                                                                                                                                                                                                                                                      | <b>NOAEL = 22 ng/kg bw/day</b><br><br>Based on distribution of lymphocytes and NK cells<br><br>Risk of bias tier: 2 |
| <b>NTP (2006)</b>                                                                                                                                                                                         | Sprague Dawley<br><br>TCDD<br><br>Female rats N= 81/82 per group) 8 weeks old administered<br>0,3,10,22,46,100 ng/kg bw per day for 5 days a week for up to 105 weeks.<br><br>Oral; Gavage<br><br>Interim culls (10 per group) at 14, 31 and 53 weeks.<br><br>As stop exposure group was administered TCDD 100 ng/kg bw per day for 30 weeks then | <b>Body weights.</b> Survival of rats was similar to controls but decreasing body weight. For 100 ng/kg bw per day occurred from week 13.<br><b>Thyroid hormone.</b> T4 levels significantly decreased by 14 weeks at 22 ng/kg bw per day.<br><b>Histopathology.</b> Besides hypertrophy, broad range of dose related toxic hepatic lesions by 101 weeks first observed as multinucleated liver cells at 31 weeks at 46 ng/kg bw per day but more encompassing hepatopathy at the 100 ng/kg bw per day dose. At 53 weeks 46 ng/kg bw per day and at 105 weeks 10 ng/kg bw per day. After 105 weeks at highest dose there was a significant increase in hepatocellular adenomas and cholangiocarcinomas<br>Small incidences of neoplastic changes in oral mucosa, lung, uterus, pancreas.<br>Many non-neoplastic effects recorded including thymic atrophy, adrenal cortex atrophy and hyperplasia, cardiopathy, mesenteric artery inflammation, nephropathy, squamous hyperplasia of forestomach and thyroid gland follicular cell hypertrophy. | <b>NOAEL = 3 ng/kg bw/day</b><br><br>Based on hepatopathy at 105 weeks<br><br>Risk of bias tier: 1                  |

| Reference                                                                                                                                                                                       | Species<br>Compound(s)<br>Dose regime<br>Study type<br>Route admin                                                                                                      | Parameters measured and measures of effects                                                                                                                                                                                                                                                                                                                                                                                                                                                                                                                                                                                                                                                                                                                                                                                                                                                                                                                                                                                                                                                                                                                                                        | NOAEL and/or LOAEL<br><br>Risk of bias tier                                                                                                |
|-------------------------------------------------------------------------------------------------------------------------------------------------------------------------------------------------|-------------------------------------------------------------------------------------------------------------------------------------------------------------------------|----------------------------------------------------------------------------------------------------------------------------------------------------------------------------------------------------------------------------------------------------------------------------------------------------------------------------------------------------------------------------------------------------------------------------------------------------------------------------------------------------------------------------------------------------------------------------------------------------------------------------------------------------------------------------------------------------------------------------------------------------------------------------------------------------------------------------------------------------------------------------------------------------------------------------------------------------------------------------------------------------------------------------------------------------------------------------------------------------------------------------------------------------------------------------------------------------|--------------------------------------------------------------------------------------------------------------------------------------------|
|                                                                                                                                                                                                 | returned stopped for remainder of 105 weeks                                                                                                                             |                                                                                                                                                                                                                                                                                                                                                                                                                                                                                                                                                                                                                                                                                                                                                                                                                                                                                                                                                                                                                                                                                                                                                                                                    |                                                                                                                                            |
| <b>Nohara et al. (2000).</b> The effects of perinatal exposure to low doses of 2,3,7,8-tetrachlorodibenzo- <i>p</i> -dioxin on immune organs in rats                                            | Holtzman<br><br>TCDD<br><br>Dams were dosed with 0, 12.5, 50, 200 or 800 ng/kg bw on GD15<br><br>Develop - GD15<br><br>Oral: Gavage                                     | <b>CYP1A1 mRNA.</b> Dose-dependent CYP1A1 mRNA induction in the thyme on PND5, whereas CYP1A1 mRNA induction in the spleen very weak. CYP1A1 mRNA induction in the thymus decreased gradually from PND 5–21 and 49. On PND 49, the induction of CYP1A1 mRNA hardly detected in the spleen maternally exposed to 800 ng TCDD/kg.<br><b>Cytokine mRNA.</b> No change was detected in the mRNA levels examined, including those for IL- 1b, IL-1a, IL-6, TGF- b and GM-CSF.<br><b>Cell numbers.</b> Thymus cell numbers not affected on PND21, 49, or 120. Spleen cellularity decreased in a dose-dependent manner, with a significant reduction at 800 ng/kg on PND49. No reproducible change seen in spleen T or B cell proportion at this age. No change detected by TCDD exposure in spleen cellularity on PND21 and 120.<br><b>Body and organ weights.</b> No changes in the body weight, thymus or spleen weight of M offspring on PND5, 21, 49 or 120 for any dose as compared to controls.                                                                                                                                                                                                    | <b>NOAEL = 200 ng/kg bw</b><br>Based on decreased spleen cellularity at puberty<br>Risk of bias tier: 1                                    |
| <b>Bell et al. (2007a).</b> Toxicity of 2,3,7,8-tetrachlorodibenzo- <i>p</i> -dioxin in the developing male Wistar(Han) rat. I: No decrease in epididymal sperm count after a single acute dose | Wistar<br><br>TCDD<br><br>Female rats (n=55-70/group) were administered with 0, 50, 200, 1000 ng/kg bw on GD15.<br><br>Acute, develop - single dose<br><br>Oral: Gavage | <b>Littering and offspring.</b> Four animals had total litter loss. The litter size in the high-dose group significantly lower than control during lactation, at PND21 the number of offspring per litter 12 % lower in the high dose group compared to control.<br>For the measurements on PND70, 25 males per group were selected (1 pup/ litter). The remaining F1 males 58, 61, 60 and 23 were necropsied on PND120.<br><b>F1 body weight gain and balano-preputial separation (BPS).</b> Pups in the high-dose group showed reduced body weight up to PND21, and pups in the mid-dose group showed slightly reduced body weight up to PND7. BPS significantly delayed in the high-dose group male offspring compared to control (p<0.01) (incidence rate 67% slower than in control).<br><b>F1 males:</b> No dose-response relationship in learning and motor activity. No significant effects when the offspring were subjected to a functional observational battery.<br><b>Reproductive capacity of F1 males.</b> No significant effects observed. Statistically significant elevation of sperm counts (~30%) in the two highest dose groups at PND120, compared to control. However, this | <b>LOAEL= 200 ng/kg bw</b><br><b>NOAEL= 50 ng/kg bw</b><br><br>Based on decreased pup weight from PND1 to PND7<br><br>Risk of bias tier: 1 |

| Reference                                                                                                                                                                       | Species<br>Compound(s)<br>Dose regime<br>Study type<br>Route admin                                                                                                                                                                                                                                               | Parameters measured and measures of effects                                                                                                                                                                                                                                                                                                                                                                                                                                                                                                                                                                                                                                                                                                                                                                                                                                                                                                                                                                                                                                                                                                                                                                                                                                                                                                                                                                                                                                                                                                                                                                                                                                                                                                              | NOAEL and/or LOAEL<br><br>Risk of bias tier                                                                                                                                   |
|---------------------------------------------------------------------------------------------------------------------------------------------------------------------------------|------------------------------------------------------------------------------------------------------------------------------------------------------------------------------------------------------------------------------------------------------------------------------------------------------------------|----------------------------------------------------------------------------------------------------------------------------------------------------------------------------------------------------------------------------------------------------------------------------------------------------------------------------------------------------------------------------------------------------------------------------------------------------------------------------------------------------------------------------------------------------------------------------------------------------------------------------------------------------------------------------------------------------------------------------------------------------------------------------------------------------------------------------------------------------------------------------------------------------------------------------------------------------------------------------------------------------------------------------------------------------------------------------------------------------------------------------------------------------------------------------------------------------------------------------------------------------------------------------------------------------------------------------------------------------------------------------------------------------------------------------------------------------------------------------------------------------------------------------------------------------------------------------------------------------------------------------------------------------------------------------------------------------------------------------------------------------------|-------------------------------------------------------------------------------------------------------------------------------------------------------------------------------|
|                                                                                                                                                                                 |                                                                                                                                                                                                                                                                                                                  | <p>effect within the normal range of sperm counts for this strain of rat, was not reflected in testicular spermatid counts nor PND70 data, and is therefore postulated to have no biological significance. Increase in the proportion of abnormal sperm at PND70, but seminology parameters otherwise unremarkable.</p> <p><b>Body weight and pathology.</b> Testis weights in the high-dose group slightly decreased at PND70 and 120. At PND120, brain weight lower in the high-dose group (2.2%), liver to body weight ratios were increased for all three dose groups 3-3.5% (not dose-related).</p>                                                                                                                                                                                                                                                                                                                                                                                                                                                                                                                                                                                                                                                                                                                                                                                                                                                                                                                                                                                                                                                                                                                                                 |                                                                                                                                                                               |
| <p><b>Bell et al. (2007b).</b> Toxicity of 2,3,7,8-tetrachlorodibenzo-<i>p</i>-dioxin in the developing male Wistar(Han) rat. II: Chronic dosing causes developmental delay</p> | <p>CRL:WI(Han)</p> <p>TCDD</p> <p>Female rats, 5 to 6 weeks old were provided with diet containing 0, 28, 93, 530 ng TCDD/kg diet <i>ad libitum</i> for 12 weeks pre-mating, during mating and gestation. Average dose is 0, 2.4, 8 or 46 ng TCDD/kg bw/day.</p> <p>Sub-chronic (15 weeks)</p> <p>Oral: Feed</p> | <p><b>Parental health.</b> No significant difference in weight gain of F between groups over the pre-mating, gestation and lactation periods. Food intake of the high dose group higher during pre-mating period, but no differences during the lactation.</p> <p><b>Littering and Offspring.</b> No differences in the pre-coital time, mating, fertility, and fecundity indices between groups. The number of implantations not significantly decreased in the treated groups. Significant decrease in the number of pups alive on day 1 in the high-dose group, and the number of pups surviving between days 1 and 4 (as a ratio of number of pups alive day 1) also statistically significantly reduced in the high-dose group.</p> <p>For the measurements on PND70, 25 males per group were selected (1 pup/ litter. The remaining F1 males 74, 73, 67 or 42 were necropsied on PND120.</p> <p><b>F1 body weight, weight gain and BPS.</b> High and mid dose offsprings showed decreased weights at various ages. BPS significantly delayed in all three dose groups compared to control (by 1.8, 1.9, and 4.4 days for low, mid and high dose, respectively).</p> <p><b>F1 males learning and Motor Activity.</b> No adverse effects on learning and memory in the swimming maze or in the performance in the functional observational battery observed, except the offsprings of animals from the high-dose group in a motor activity test.</p> <p><b>F1 males reproductive capacity.</b> No significant effects on the fertility of the M rats or on the F1 or F2 sex ratio. No significant effect in sperm parameters of F1 M rats at PND70 and 120, except for an increase in the proportion of abnormal sperm in the high dose group at</p> | <p><b>LOAEL= 2.4 ng/kg bw/day</b></p> <p>Based on delayed balano-preputial separation (diet: 12 week pre-mating, mating and gestation period)</p> <p>Risk of bias tier: 1</p> |

| Reference                                                                                                                                                                                                 | Species<br>Compound(s)<br>Dose regime<br>Study type<br>Route admin                                                                                                                                                            | Parameters measured and measures of effects                                                                                                                                                                                                                                                                                                                                                                                                                                                                                                                                                                                                                                                                                                                                                                                                                                                                                                                                                                                                                                                                                                                                                                                                                                                                                                                                                                                                                                                                                                                                                                                                                                                                               | NOAEL and/or LOAEL<br><br>Risk of bias tier                                                                                                                     |
|-----------------------------------------------------------------------------------------------------------------------------------------------------------------------------------------------------------|-------------------------------------------------------------------------------------------------------------------------------------------------------------------------------------------------------------------------------|---------------------------------------------------------------------------------------------------------------------------------------------------------------------------------------------------------------------------------------------------------------------------------------------------------------------------------------------------------------------------------------------------------------------------------------------------------------------------------------------------------------------------------------------------------------------------------------------------------------------------------------------------------------------------------------------------------------------------------------------------------------------------------------------------------------------------------------------------------------------------------------------------------------------------------------------------------------------------------------------------------------------------------------------------------------------------------------------------------------------------------------------------------------------------------------------------------------------------------------------------------------------------------------------------------------------------------------------------------------------------------------------------------------------------------------------------------------------------------------------------------------------------------------------------------------------------------------------------------------------------------------------------------------------------------------------------------------------------|-----------------------------------------------------------------------------------------------------------------------------------------------------------------|
|                                                                                                                                                                                                           |                                                                                                                                                                                                                               | <p>PND70 associated with the developmental delay in puberty in this dose group.</p> <p><b>F1 males body weight and pathology.</b> Terminal body weight at PND70 not significantly different between the groups, but significant decrease at PND120 in the high-dose group (6.9%) compared to control. No remarkable findings on organ weights, except that testis weights reduced by ~10% at PND70 (but not PND120). Ventral prostate weight not reduced. No significant effects upon histopathological comparison of high-dose and control group organs.</p>                                                                                                                                                                                                                                                                                                                                                                                                                                                                                                                                                                                                                                                                                                                                                                                                                                                                                                                                                                                                                                                                                                                                                             |                                                                                                                                                                 |
| <p><b>Rebourcet et al. (2010).</b><br/>The effects of an in utero exposure to 2,3,7,8-tetrachloro-dibenzo-<i>p</i>-dioxin on male reproductive function: identification of Ccl5 as a potential marker</p> | <p>Sprague-Dawley</p> <p>TCDD</p> <p>Time pregnant female rats administered 0, 10, 100, 200 ng/kg bw on GD15.</p> <p>F1 males necropsied on PND 28, 40, 67 or 145</p> <p>Acute, develop - single dose</p> <p>Oral: Gavage</p> | <p><b>Effect on F1 Males.</b> No treatment-related differences regarding litter size, sex ratio or body weight of pups if data expressed per litter. Intra-testicular levels of testosterone and 4-androstenedione in the normal range in 28-, 40-, 67- and 145-day old rats at 200 ng/kg bw. Testicular and epididymal weights within the normal range in rats of the differently dosed groups compared with controls. Gross histology of the testes normal throughout development.</p> <p><b>Sperm counts and DSP in F1 Males.</b> No statistically significant effects in sperm counts at 10 and 100 ng TCDD/kg bw. TCDD at 200 ng/kg bw induced significant decreases in sperm reserves in the F1 males at PND67, but not at PND145.</p> <p><b>Reproductive performance of F1 M and the F2 generation</b> (no control group used; data were compared to the control group of the F0-generation and their offspring). No statistically significant differences in pregnancy outcome, litter size and sex ratio. No difference in male pup weight between groups, hepatic Cyp1a1 gene expression levels remained at nadir in both groups and Ccl5/Rantes mRNA testicular levels measured in 67- and 145-day-old rats were in the same range in both groups. Sperm counts and DSP in the normal range in rats of the F2 generation, in both groups.</p> <p><b>Gene expression.</b> Three genes were up- and five genes were down-regulated by <math>\pm 1.4</math> fold in the testis of the F1-males from the high-dose group. In the F1-males of the high-dose group Ccl5/Rantes gene expression was inhibited throughout the study and at PND67 and 145 in the 100 ng TCDD group (other time points not studied).</p> | <p><b>LOAEL= 200 ng/kg bw</b><br/><b>NOAEL= 100 ng/kg bw</b></p> <p>Based on decreased pup weights and decreased sperm reserves</p> <p>Risk of bias tier: 2</p> |

**Table 57.** Overview of the mice studies retrieved in the literature search in which exposure was validated

| <b>Studies with exposure levels at or below the intake cut-off <sup>(a)</sup></b>                                                                                               |                                                             |
|---------------------------------------------------------------------------------------------------------------------------------------------------------------------------------|-------------------------------------------------------------|
| <b>Li et al. (2006).</b> The early embryo loss caused by TCDD may be related to the accumulation of this compound in the uterus                                                 | TCDD                                                        |
| <b>Fader et al. (2015).</b> TCDD Alters Lipid Metabolism and Depletes Immune Cell Populations in the Jejunum of C57BL/6 Mice                                                    | TCDD<br><i>NOAEL/LOAEL<br/>above intake cut-off</i>         |
| <b>Nault et al. (2016).</b> Dose-dependent metabolic reprogramming and differential gene expression in TCDD-elicited hepatic fibrosis                                           | TCDD<br><i>NOAEL/LOAEL<br/>above intake cut-off</i>         |
| <b>van Esterik et al. (2015).</b> Compound- and sex-specific effects on programming of energy and immune homeostasis in adult C57BL/6JxWB mice after perinatal TCDD and PCB 153 | TCDD<br><i>Intermediate<br/>endpoint</i>                    |
| <b>Studies with exposure levels above the intake cut-off</b>                                                                                                                    |                                                             |
| <b>Patterson et al. (2003).</b> Induction of apoptosis by TCDD following endotoxin exposure                                                                                     | TCDD                                                        |
| <b>Aragon et al. (2008).</b> In utero and lactational TCDD exposure: Effects on fetal and adult cardiac gene expression and adult cardiac and renal morphology                  | TCDD                                                        |
| <b>Morris et al. (1998).</b> Characterization of the effects of TCDD in B6C3F1 and DBA/2 mice following single and repeated exposures                                           | TCDD                                                        |
| <b>DeKrey et al. (2013).</b> 2,3,7,8- TCDD Slows the Progression of Experimental Cutaneous Leishmaniasis in Susceptible BALB/c and SCID Mice                                    | TCDD                                                        |
| <b>Kimura et al. (2015).</b> Developmental origin of abnormal dendritic growth in the mouse brain induced by in utero disruption of aryl hydrocarbon receptor signalling        | TCDD                                                        |
| <b>Fletcher et al. (2001).</b> Hepatic vitamin A depletion is a sensitive marker of TCDD exposure in four rodent species                                                        | TCDD                                                        |
| <b>Huang et al. (1998).</b> Pre- and postnatal exposure to PCB-77: I. Effects on breeding ability and sperm fertilizing ability in male mice                                    | PCB-77                                                      |
| <b>Huang et al. (1998).</b> Pre- and postnatal exposure to PCB-77: II. Effects on the reproductive capacity and fertilizing ability of eggs in female mice                      | PCB-77                                                      |
| <b>Studies not considered for the reason highlighted</b>                                                                                                                        |                                                             |
| <b>Kopec et al. (2008).</b> Comparative toxicogenomic examination of the hepatic effects of PCB126 and TCDD in immature, ovariectomized C57BL/6 mice                            | TCDD, PCB-126<br><i>Ovariectomized<br/>animals</i>          |
| <b>Kopec et al. (2010).</b> Automated Dose-Response Analysis and Comparative Toxicogenomic Evaluation of the Hepatic Effects Elicited by TCDD, TCDF, and PCB126 in C57BL/6 Mice | TCDD, PCB-126,<br>TCDF<br><i>Ovariectomized<br/>animals</i> |
| <b>Kopec et al 2011.</b> Non-additive hepatic gene expression elicited by TCDD and PCB153 co-treatment in C57BL/6 mice                                                          | TCDD<br><i>Ovariectomized<br/>animals</i>                   |
| <b>Boverhof et al 2005.</b> Temporal and dose-dependent hepatic gene expression patterns in mice provide new insights into TCDD-mediated hepatotoxicity                         | TCDD<br><i>Ovariectomized<br/>animals</i>                   |
| <b>Boverhof et al 2006.</b> Comparative toxicogenomic analysis of the hepatotoxic effects of TCDD in Sprague Dawley rats and C57BL/6 mice                                       | TCDD<br><i>Ovariectomized<br/>animals</i>                   |
| <b>Slezak et al. (2000).</b> Oxidative stress in female B6C3F1 mice following acute and subchronic exposure to TCDD                                                             | TCDD<br><i>Intermediate<br/>endpoint</i>                    |
| <b>Thomae et al. (2004).</b> A maternal Ahr null genotype sensitizes embryos to chemical teratogenesis                                                                          | TCDD<br><i>Intermediate<br/>endpoint</i>                    |

(a): The CONTAM Panel decided to select from the retrieved literature only studies with effects considered relevant and occurring at body burdens at or below those estimated for the NOAEL in the study by Ohsako et al. (2001) of 20 ng/kg bw, or for the LOAEL in the study by Faqi et al. (1998) of 40 ng/kg bw. To select such studies, it was decided to apply a (screening) 'body burden cut-off' of 100 ng/kg bw. So all retrieved studies in which either a single dose, or repeated doses could lead to a body burden at or below 100 ng/kg bw were selected. In rodents a body burden of 100 ng/kg bw is expected after chronic gavage dosing of 10 ng/kg bw per day, therefore selected as the chronic intake cut-off value. In a similar way, intake cut-off values for less than subacute, subacute and subchronic exposure duration were developed and used for screening such studies For more details see Section 3.1.2.1).

**Table 58.** Toxicity studies performed in mice administered TCDD retrieved by the literature search, in which exposure was validated and the external dose was at or below the intake cut-off. Details about the risk of bias appraisal can be found in Annex A.7

| Reference                                                                                                                                                                    | Species<br>Compounds<br>Dose regime<br>Study type<br>Route admin                                                                                                                                                                                                                                 | Parameters measured and measures of effects                                                                                                                                                                                                                                                                                                                                                    | NOAEL<br>(and/or<br>LOAEL)                                                                  |
|------------------------------------------------------------------------------------------------------------------------------------------------------------------------------|--------------------------------------------------------------------------------------------------------------------------------------------------------------------------------------------------------------------------------------------------------------------------------------------------|------------------------------------------------------------------------------------------------------------------------------------------------------------------------------------------------------------------------------------------------------------------------------------------------------------------------------------------------------------------------------------------------|---------------------------------------------------------------------------------------------|
| <p><b>Li et al. (2006).</b> The early embryo loss caused by 2,3,7,8-tetrachlorodibenzo-<i>p</i>-dioxin may be related to the accumulation of this compound in the uterus</p> | <p>NIH mice</p> <p>TCDD</p> <p>Pregnant and pseudo-pregnant mice were daily administered with 0, 2, 50, 100 ng/kg bw during GD1-8, preimplantation stages (days 1-3) and peri-implantation to early post-implantation stages (days 4-8).</p> <p>Sub-acute (GD1-GD8)</p> <p>Oral: Unspecified</p> | <p>Number of implanted embryos significantly reduced on GD9 in the dams dosed with 50 and 100 ngTCDD/kg. The number of implantation sites was lower in animals exposed to TCDD on days 1-3 when compared to the animals exposed on days 4-8.</p> <p>No effects on the estradiol levels but progesterone was significantly lower on day 9 in all treatment groups when compared to control.</p> | <p><b>NOAEL = 2 ng/kg bw</b></p> <p>Based on embryonic loss</p> <p>Risk of bias tier: 1</p> |



**Table 59.** Overview of the guinea pig studies retrieved in the literature search in which exposure was validated

| <b>Studies with exposure levels at or below the intake cut-off<sup>(a)</sup></b>                                                                                        |      |
|-------------------------------------------------------------------------------------------------------------------------------------------------------------------------|------|
| <b>Fletcher et al. (2001).</b> Hepatic vitamin A depletion is a sensitive marker of 2,3,7,8-tetrachlorodibenzo- <i>p</i> -dioxin (TCDD) exposure in four rodent species | TCDD |
| <b>Studies with exposure levels above the intake cut-off</b>                                                                                                            |      |
| <b>Kransler et al. (2007a).</b> Comparative developmental toxicity of 2,3,7,8-tetrachlorodibenzo- <i>p</i> -dioxin in the hamster, rat and guinea pig                   | TCDD |

(a): The CONTAM Panel decided to select from the retrieved literature only studies with effects considered relevant and occurring at body burdens at or below those estimated for the NOAEL in the study by Ohsako et al. (2001) of 20 ng/kg bw, or for the LOAEL in the study by Faqi et al. (1998) of 40 ng/kg bw. To select such studies, it was decided to apply a (screening) 'body burden cut-off' of 100 ng/kg bw. So all retrieved studies in which either a single dose, or repeated doses could lead to a body burden at or below 100 ng/kg bw were selected. In rodents a body burden of 100 ng/kg bw is expected after chronic gavage dosing of 10 ng/kg bw per day, therefore selected as the chronic intake cut-off value. In a similar way, intake cut-off values for less than subacute, subacute and subchronic exposure duration were developed and used for screening such studies For more details see Section 3.1.2.1).

**Table 60.** Overview of the studies in hamsters retrieved in the literature search in which exposure was validated

| <b>Studies with exposure levels at or below the intake cut-off<sup>(a)</sup></b>                                                                                        |      |
|-------------------------------------------------------------------------------------------------------------------------------------------------------------------------|------|
| <b>Fletcher et al. (2001).</b> Hepatic vitamin A depletion is a sensitive marker of 2,3,7,8-tetrachlorodibenzo- <i>p</i> -dioxin (TCDD) exposure in four rodent species | TCDD |
| <b>Studies with exposure levels above the intake cut-off</b>                                                                                                            |      |
| <b>Kransler et al. (2007a).</b> Comparative developmental toxicity of 2,3,7,8-tetrachlorodibenzo- <i>p</i> -dioxin in the hamster, rat and guinea pig                   | TCDD |

(a): The CONTAM Panel decided to select from the retrieved literature only studies with effects considered relevant and occurring at body burdens at or below those estimated for the NOAEL in the study by Ohsako et al. (2001) of 20 ng/kg bw, or for the LOAEL in the study by Faqi et al. (1998) of 40 ng/kg bw. To select such studies, it was decided to apply a (screening) 'body burden cut-off' of 100 ng/kg bw. So all retrieved studies in which either a single dose, or repeated doses could lead to a body burden at or below 100 ng/kg bw were selected. In rodents a body burden of 100 ng/kg bw is expected after chronic gavage dosing of 10 ng/kg bw per day, therefore selected as the chronic intake cut-off value. In a similar way, intake cut-off values for less than subacute, subacute and subchronic exposure duration were developed and used for screening such studies For more details see Section 3.1.2.1).

## A.6.2. Studies in primates

### Summary of the consideration of studies in primates in previous risk assessments

In 2000, SCF considered the studies by Schantz and Bowman (1989) and Rier et al. (1993) for the determination of the tolerable daily intake (TDI) for TCDD. In these studies TCDD was administered to groups of female rhesus monkeys of one colony providing a LOAEL of 0.15 ng/kg bw per day after prolonged dietary administration. SCF was however not able to determine the clinical significance for humans of the findings by Schantz and Bowman (1989). These included a subtle, non-persistent, neurobehavioural change in the offspring of the TCDD treated monkeys. In the study by Rier et al. (1993), the development of endometriosis in the animals some 10 years after the dietary TCDD treatment had been discontinued was noted. Problems in the reporting and results were identified (e.g. it was not clear whether identical surgical procedures had been carried out on control and treated monkeys, that body weights had not been reported and that the colony had a very high incidence of endometriosis) (SCF, 2000). In its re-evaluation in 2002, SCF considered two additional studies of these monkeys by Rier et al. (2001a,b) and supplemental unpublished data. These new data addressed some of the concerns SCF had identified in the study on endometriosis by Rier et al. (1993), e.g. similar surgical procedures had been carried out on animals of both the earlier treated and control groups. However, due to the uncertainties raised by the new studies, SCF had less confidence in the quantitative relationship between exposure to TCDD and the incidence of endometriosis in monkeys. Therefore, SCF decided not to include Rier et al. (1993) as a pivotal study in its 2002 assessment, although it recognized that effects were reported at body burdens similar to those calculated for other (rat) studies. Regarding the behavioural effects reported in Schantz and Bowman (1989) and the concerns about its clinical significance for humans, the two new studies did

not provide new information. Therefore, the SCF decided not to include this study as a pivotal study in its 2002 assessment.

The study by Rier et al. (2001b) studied the effects of TCDD exposure on the immune system of rhesus monkeys (i.e. the phenotype and function of peripheral blood mononuclear cells). SCF noted that clinical studies have indicated a relationship between endometriosis and deficiencies in humoral and cell-mediated immunity. However, SCF considered that it was not possible to establish causality of immune system changes in rhesus monkeys receiving TCDD in the diet and therefore did not include this study as a pivotal study in the updated 2002 assessment. Due to the issues above, SCF decided to base its 2002 assessment on the rodent studies rather than on the rodent and monkey studies.

US-EPA (2012) selected the studies by Bowman et al. (1989a,b), Schantz and Bowman (1989), Schantz et al. (1986) and Yang et al. (2000) for noncancer dose-response modeling, and estimated a candidate reference dose (RfD) of 0.027 pg/kg bw per day based on neurobehavioral effects from the studies by Schantz and Bowman mentioned above, based on a LOAEL of 8.2 pg/kg bw per day and using an overall uncertainty factor of 300. It was noted that there are no published toxicokinetic models to estimate TCDD disposition in monkey studies, so first-order body burden models were applied.

**Table 61.** Studies on the effects of PCDD/Fs and DL-PCBs in primates considered in the risk assessment. Details about the risk of bias appraisal can be found in Annex A.7

| Reference                                                                                                                                                                                                  | Strain<br>Sex<br>Age<br>Study type                                                                           | Compounds<br>Route admin<br>Dose regime<br>Duration                                                                                                                                                                                                                                                                                                                                                                                                     | Dose groups<br>Animals/group                                                                                                                                                                                                           | Parameters measured and measures of effect<br><br>Tier of reliability                                                                                                                                                                                                                                                                                                                                                                                                                                                                                                                                                                                                                                                                                                                                                                                                                                                                                                                                                                                                                                                                                                                                                                                                                                           |
|------------------------------------------------------------------------------------------------------------------------------------------------------------------------------------------------------------|--------------------------------------------------------------------------------------------------------------|---------------------------------------------------------------------------------------------------------------------------------------------------------------------------------------------------------------------------------------------------------------------------------------------------------------------------------------------------------------------------------------------------------------------------------------------------------|----------------------------------------------------------------------------------------------------------------------------------------------------------------------------------------------------------------------------------------|-----------------------------------------------------------------------------------------------------------------------------------------------------------------------------------------------------------------------------------------------------------------------------------------------------------------------------------------------------------------------------------------------------------------------------------------------------------------------------------------------------------------------------------------------------------------------------------------------------------------------------------------------------------------------------------------------------------------------------------------------------------------------------------------------------------------------------------------------------------------------------------------------------------------------------------------------------------------------------------------------------------------------------------------------------------------------------------------------------------------------------------------------------------------------------------------------------------------------------------------------------------------------------------------------------------------|
| <p><b>Yasuda et al. (2005).</b> In utero and lactational exposure to 2,3,7,8-tetrachlorodibenzo-<i>p</i>-dioxin (TCDD) affects tooth development in rhesus monkeys</p>                                     | <p>Rhesus macaque (<i>Macaca mulatta</i>)</p> <p>F</p> <p>3-10 years</p> <p>Chronic, Developmental study</p> | <p>TCDD</p> <p><i>s.c.</i></p> <p>0, 30, 300 ng/kg on GD20. Dams received additional injection of 5% of the initial dose every 30 days until day 90 after delivery. Total dose administered to the higher dose group: 405 ng/kg (300+15×7 for dams with gestation length less than 170 days) or 420 ng/kg (300+15×8 for dams with gestation length 170 days or more) and that to the lower-dose group was 40.5 or 42 ng/kg.</p> <p>Approx. 240 days</p> | <p>3 dose groups</p> <p>Pregnant females<br/>Control: n=23<br/>Low-dose: n=20,<br/>High-dose: n=20<br/>Additional high-dose: n=9</p> <p>Dental findings in offspring,<br/>Control: n=13,<br/>Low-dose: n=13,<br/>High-dose: n=8 +3</p> | <p><b>Pregnancy outcomes.</b> No statistically significant effect on maternal health. Abortions, stillbirths and early postnatal deaths occurred in higher frequency in high dose TCDD groups (not statistically significant). Prenatal and early postnatal mortality rate of the offspring was higher in the 300 ng/kg group (41%) than in the control group (26%). No statistically significant differences in the length of gestation or birth weight.</p> <p><b>Dental findings.</b> Dental examination of the dead offspring showed tooth abnormalities in the 300 ng/kg group only. Three out of 5 animals had tooth abnormalities (e.g. precocious eruption, dysplasia, incomplete calcification, and missing teeth). The incidence of tooth abnormalities in the 300 ng/kg group was high (60%), but it did not differ significantly from the control incidence (0%; <math>P &gt; 0.1</math>). The incidence of tooth abnormalities in surviving offspring was significantly higher in the 300 ng/kg bw group (<math>p &lt; 0.01</math>).</p> <p>The CONTAM Panel agrees with the author's conclusion that prenatal and lactational exposure to TCDD with an initial dose of 300 ng/kg and a maintenance dose of 15 ng/kg affected tooth development in rhesus monkeys.</p> <p>Risk of bias tier: 2</p> |
| <p><b>Negishi et al. (2006).</b> Gestational and lactational exposure to 2,3,7,8-tetrachlorodibenzo-<i>p</i>-dioxin affects social behaviors between developing rhesus monkeys (<i>Macaca mulatta</i>)</p> | <p>Rhesus macaque (<i>Macaca mulatta</i>)</p> <p>F</p> <p>3-10 years</p> <p>Chronic, Developmental study</p> | <p>TCDD</p> <p><i>s.c.</i></p> <p>0, 30, 300 ng/kg on GD20, followed by additional injections at 5% of the initial dose (1.5 or 15 ng/kg) every 30 days during pregnancy and lactation until PND90. The total dose administered to the</p>                                                                                                                                                                                                              | <p>3 dose groups</p> <p>Pregnant F:<br/>Control: 23<br/>Low-dose: 20<br/>High-dose: 20<br/>Additional high-dose: 9</p> <p>Offspring tested:<br/>Finger maze test:<br/>Control: 4 males</p>                                             | <p><b>General observations (survival of offspring, gestational length, bw at birth).</b> No significant effect on the sex ratio or on the gestation length. TCDD exposure did not affect body weight at birth. No effects on anogenital distances were seen in M of F neonates. No external abnormalities were observed.</p> <p><b>Behavioural observations - Finger maze-learning test.</b> No effects observed in finger maze-learning test, but the offspring of the 300 ng/kg group appeared to learn more quickly than the control.</p> <p><b>Behavioural observations - Encounter tests.</b> Exposure to TCDD</p>                                                                                                                                                                                                                                                                                                                                                                                                                                                                                                                                                                                                                                                                                         |

| Reference                                                                                                                                               | Strain<br>Sex<br>Age<br>Study type                                                                                                                                                   | Compounds<br>Route admin<br>Dose regime<br>Duration                                                                                                                                                                                                                                                                                                                                                                                                                                              | Dose groups<br>Animals/group                                                                                                                                                                  | Parameters measured and measures of effect<br><br>Tier of reliability                                                                                                                                                                                                                                                                                                                                                                                                                                                                                                                                                                                                                                                                                                                                                                                                                                                                                                                                                                                                                                                                                                                                                                                                                                                                                                                                                                                                                                                                                                        |
|---------------------------------------------------------------------------------------------------------------------------------------------------------|--------------------------------------------------------------------------------------------------------------------------------------------------------------------------------------|--------------------------------------------------------------------------------------------------------------------------------------------------------------------------------------------------------------------------------------------------------------------------------------------------------------------------------------------------------------------------------------------------------------------------------------------------------------------------------------------------|-----------------------------------------------------------------------------------------------------------------------------------------------------------------------------------------------|------------------------------------------------------------------------------------------------------------------------------------------------------------------------------------------------------------------------------------------------------------------------------------------------------------------------------------------------------------------------------------------------------------------------------------------------------------------------------------------------------------------------------------------------------------------------------------------------------------------------------------------------------------------------------------------------------------------------------------------------------------------------------------------------------------------------------------------------------------------------------------------------------------------------------------------------------------------------------------------------------------------------------------------------------------------------------------------------------------------------------------------------------------------------------------------------------------------------------------------------------------------------------------------------------------------------------------------------------------------------------------------------------------------------------------------------------------------------------------------------------------------------------------------------------------------------------|
|                                                                                                                                                         | ntal study                                                                                                                                                                           | higher dose group was 405 ng/kg (300 + 15 × 7 for dams with gestation length less than 170 days) or 420 ng/kg (300 + 15 × 8 for dams with gestation length 170 days or more) and that to the lower-dose group was 40.5 or 42 ng/kg..<br><br>Approx 240 days                                                                                                                                                                                                                                      | Low-dose: 4 males<br>High-dose: 3 males<br><br>Encounter test:<br>2 males and 2 females /group<br><br>Eye contact test:<br>28 offspring, groups not described                                 | significantly affected behavioural responses in the encounter tests. In the first encounter test, more visual exploration and mutual proximity but less stereotypy behaviour was observed in monkeys exposed to TCDD when compared to controls. These differences were not noticed in the second test repeated 12 months later.<br><br><b>Behavioural observations - Eye-contact test.</b> No significant effect of TCDD exposure.<br><br>Risk of bias tier: 2                                                                                                                                                                                                                                                                                                                                                                                                                                                                                                                                                                                                                                                                                                                                                                                                                                                                                                                                                                                                                                                                                                               |
| <b>Korenaga et al. (2007).</b> Long-term effects of subcutaneously injected 2,3,7,8-tetrachlorodibenzo- <i>p</i> -dioxin on the liver of rhesus monkeys | Rhesus macaque ( <i>Macaca mulatta</i> )<br><br>F<br><br>4-10 years<br><br>(author confirmed in email this is the Yasuda study)<br><br>Chronic, 4 years after initial administration | TCDD<br><br><i>s.c.</i><br><br>0, 30, 300 ng/kg on GD20.<br><br>As a maintaining dose, the dams received 5% of the initial dose (i.e., 1.5 or 15 ng/kg) every 30 days during pregnancy and lactation until PND 90.<br><br>The total dose administered to the higher dose group was 405 ng/kg (300 + 15 × 7 for dams with gestation length less than 170 days) or 420 ng/kg (300 + 15 × 8 for dams with gestation length 170 days or more) and that to the lower-dose group was 40.5 or 42 ng/kg. | 3 dose groups<br><br>Pregnant females<br>Control: n=23<br>Low-dose: n=20<br>High-dose: n=20<br>Additional high-dose: n=9<br><br>Liver effects:<br>3 (control),<br>4 (low-dose)<br>3 high-dose | <b>General effects.</b> No effects on external appearance, behaviour or body weight. No significant difference in the liver weight among three dose groups. Significant pathological abnormalities observed in the liver tissue.<br><br><b>Effects of pregnancy and offspring.</b> No significant changes in the length of gestation, pregnancy outcomes, and offspring birth weight among the three dose groups<br><br><b>Histopathological findings in the liver tissues.</b> Focal fatty changes localized at the periphery and infarction with hemorrhage found in the liver at 30 and 300 ng/kg. Focal fatty change represented nodular or tumor formation. Coagulation necrosis or cytolytic change and haemorrhage indicated in the infarction and infarctoid lesions of the liver. Parenchymal hemorrhage, sinusoidal ectasia and intrasinusoidal microthrombification observed in TCDD-exposed monkeys. Small cell hypercellularity of hepatocytes in hepatic lobules evident in 5/7 monkeys injected with TCDD. Bile duct epithelial hyperplasia found. No dose-relationship in the abnormalities.<br><br>In most treated monkeys an intrasinusoidal alpha-SMA-positive cell hyperplasia was noticed which indicated satellite cell hyperplasia or transformation into the myofibroblasts. Densely arranged small hepatocytes within hepatic lobules showed no labelling with MIB-1 antibody but high MIB-1 labeling indices were shown in the hyperplastic epithelium of bile ducts.<br><br>Sinusoidal endothelial cell injury and swelling with degeneration and |

| Reference                                                                                                                                                                 | Strain<br>Sex<br>Age<br>Study type                                                                       | Compounds<br>Route admin<br>Dose regime<br>Duration                                                                                                                                                                                                                                                                                                                                                                                                                                           | Dose groups<br>Animals/group                                                                                                                                                                                                                                                                                                                                                                      | Parameters measured and measures of effect<br><br>Tier of reliability                                                                                                                                                                                                                                                                                                                                                                                                                                                                                                                                                                                                                                                                                                                                                                                                                                                                                                                                                                                                                                                                                                                                                                                           |
|---------------------------------------------------------------------------------------------------------------------------------------------------------------------------|----------------------------------------------------------------------------------------------------------|-----------------------------------------------------------------------------------------------------------------------------------------------------------------------------------------------------------------------------------------------------------------------------------------------------------------------------------------------------------------------------------------------------------------------------------------------------------------------------------------------|---------------------------------------------------------------------------------------------------------------------------------------------------------------------------------------------------------------------------------------------------------------------------------------------------------------------------------------------------------------------------------------------------|-----------------------------------------------------------------------------------------------------------------------------------------------------------------------------------------------------------------------------------------------------------------------------------------------------------------------------------------------------------------------------------------------------------------------------------------------------------------------------------------------------------------------------------------------------------------------------------------------------------------------------------------------------------------------------------------------------------------------------------------------------------------------------------------------------------------------------------------------------------------------------------------------------------------------------------------------------------------------------------------------------------------------------------------------------------------------------------------------------------------------------------------------------------------------------------------------------------------------------------------------------------------|
|                                                                                                                                                                           |                                                                                                          |                                                                                                                                                                                                                                                                                                                                                                                                                                                                                               |                                                                                                                                                                                                                                                                                                                                                                                                   | <p>sinusoidal luminal stenosis in the liver of TCDD treated monkeys were revealed by electron microscopic examination.</p> <p>Dose-dependent decrease in AhR and VE cadherin protein levels (significantly in the high-dose group) observed in liver tissue of the TCDD treated animals. The increase in CYP1A1 protein level was significantly higher in the liver tissues of the monkeys at 300 ng/kg.</p> <p>AhR and VE cadherin protein levels decreased in a dose-dependent manner in the liver of the TCDD- treated monkeys. CYP1A1 and TGF-beta protein levels increased in a dose-dependent manner in the liver tissues of the TCDD-treated monkeys. CYP1A1 protein level significantly higher in the liver tissues at 300 ng/kg. VE cadherin protein expression significantly decreased in liver tissues at the high-dose compared to controls.</p> <p>Risk of bias tier: 2</p>                                                                                                                                                                                                                                                                                                                                                                        |
| <p><b>Hermesen et al. (2008).</b> <i>In utero</i> and lactational exposure to 2,3,7,8-tetrachlorodibenzo-<i>p</i>-dioxin (TCDD) affects bone tissue in rhesus monkeys</p> | <p>Rhesus macaque (<i>Macaca mulatta</i>)<br/>F<br/>4-10 years<br/><br/>Chronic, Developmental study</p> | <p>TCDD<br/><br/><i>s.c.</i><br/><br/>0, 30, 300 ng/kg on GD20. As a maintaining dose, the dams received 5% of the initial dose (i.e., 1.5 or 15 ng/kg) every 30 days during pregnancy and lactation until PND 90. The total dose administered to the higher dose group was 405 ng/kg (300 + 15 × 7 for dams with gestation length less than 170 days) or 420 ng/kg (300 + 15 × 8 for dams with gestation length 170 days or more) and that to the lower-dose group was 40.5 or 42 ng/kg.</p> | <p>3 dose groups<br/><br/>Pregnant females<br/>Control: n=23<br/>Low-dose: n=20<br/>High-dose: n=20<br/>Additional high-dose: n=9<br/><br/>Dental findings in offspring control: n=13,<br/>Low-dose: n=13<br/>High-dose: n=8 +3<br/><br/>Number of offspring: 10 in control group (4 males and 6 females), 9 in low-dose group (6 males and 3 females) and 5 in high-dose group (3 M and 2 F)</p> | <p><b>Bone composition and geometry (pQCT scan).</b> Significant increases in trabecular bone mineral content (BMC; +84.6%, <math>p &lt; 0.05</math>, <math>F</math>-value(<math>F</math>)=5.9) in the metaphyseal part of the femur bones in F offspring in the low dose treatment group compared with controls. Analysis of the mid-diaphyseal part revealed increases in total BMC (+21.3%, <math>p &lt; 0.05</math>, <math>F</math>=5.2) and cortical cross-sectional area (CSA; +16.4%, <math>p &lt; 0.01</math>, <math>F</math>=7.4) in the female offspring from the low dose group when compared with the controls.</p> <p><b>Biomechanical testing.</b> In males, changes in biomechanical properties indicating more fragile bone. Displacement at failure significantly increased in the males low dose group compared to controls (+38.0%, <math>p &lt; 0.05</math>, <math>F</math>=11). The high TCDD dose did not induce any significant changes in bone morphology.</p> <p><b>Serum analysis of bone biomarkers.</b> No significant changes in none of the bone biomarkers ALP, CTX-1 and 25-OH vitamin D.</p> <p><b>Immunohistochemistry.</b> No differences in vWF, ICAM-1, osteocalcin and AhR expression found between treatment levels.</p> |

| Reference                                                                                                                                                                                               | Strain<br>Sex<br>Age<br>Study type                                                                       | Compounds<br>Route admin<br>Dose regime<br>Duration                                                                                                                                                                                                                                                                                                                                                                                                                | Dose groups<br>Animals/group                                                                                                                                                                                                                                                                                                                                                                                                    | Parameters measured and measures of effect<br><br>Tier of reliability                                                                                                                                                                                                                                                                                                                                                                                                                                                                                                                                                                                                                                                                                                                                                                                                                                                                                                                                                                                                                                                                                                                                                                                                                                                                                                                                                                                                                                                                                                                                                                                                                                                                                                                                                                                                                                                                                                                                                                                                                                                                                                                 |
|---------------------------------------------------------------------------------------------------------------------------------------------------------------------------------------------------------|----------------------------------------------------------------------------------------------------------|--------------------------------------------------------------------------------------------------------------------------------------------------------------------------------------------------------------------------------------------------------------------------------------------------------------------------------------------------------------------------------------------------------------------------------------------------------------------|---------------------------------------------------------------------------------------------------------------------------------------------------------------------------------------------------------------------------------------------------------------------------------------------------------------------------------------------------------------------------------------------------------------------------------|---------------------------------------------------------------------------------------------------------------------------------------------------------------------------------------------------------------------------------------------------------------------------------------------------------------------------------------------------------------------------------------------------------------------------------------------------------------------------------------------------------------------------------------------------------------------------------------------------------------------------------------------------------------------------------------------------------------------------------------------------------------------------------------------------------------------------------------------------------------------------------------------------------------------------------------------------------------------------------------------------------------------------------------------------------------------------------------------------------------------------------------------------------------------------------------------------------------------------------------------------------------------------------------------------------------------------------------------------------------------------------------------------------------------------------------------------------------------------------------------------------------------------------------------------------------------------------------------------------------------------------------------------------------------------------------------------------------------------------------------------------------------------------------------------------------------------------------------------------------------------------------------------------------------------------------------------------------------------------------------------------------------------------------------------------------------------------------------------------------------------------------------------------------------------------------|
| <b>Arima et al. (2009).</b><br>In utero and lactational exposure to 2,3,7,8-tetrachlorodibenzo- <i>p</i> -dioxin (TCDD) induces a reduction in epididymal and ejaculated sperm number in rhesus monkeys | Rhesus macaque ( <i>Macaca mulatta</i> )<br><br>F<br><br>4-10 years<br><br>Chronic , developmental study | TCDD<br><br><i>s.c.</i><br><br>0, 30, 300 ng/kg <i>s.c.</i> on GD20 and then 5 % of initial dose (1.5 or 15 ng/kg) every 30 days during the gestation and lactation periods until PND90.<br>The total dose administered to the higher dose group was 405 ng/kg (300 + 15 × 7 for dams with gestation length less than 170 days) or 420 ng/kg (300 + 15 × 8 for dams with gestation length 170 days or more) and that to the lower-dose group was 40.5 or 42 ng/kg. | 3 dose groups<br><br>Pregnant females<br>Control: n=23<br>Low-dose: n=20<br>High-dose: n=20<br>Additional high-dose: n=9<br><br>Offspring tested:<br>Anogenital distance on PND 1/820 measured in: n=5/5 (control), n=8/7 (low-dose), n=8/5 (high-dose);<br><br>Reproductive organ weight and histology in: n=3 (control), n=5 (low-dose), n=3 (high-dose)<br><br>Semen quality: n=4 (control), n=6 (low-dose), n=5 (high-dose) | Risk of bias tier: 2<br><br><b>Maternal and reproductive outcome data.</b> No effects on maternal general condition, bw, food consumption or gestational length. Relatively high frequencies of abortions, stillbirth and postnatal death observed in all groups and control. Survival rate at 7 years was comparable, if the deaths within 1 month after birth were excluded. No differences in sex ratio at birth or pre-and postnatal loss ratio.<br><br><b>Developmental landmarks.</b> The body weight of offspring from the 300 ng/kg group was suppressed by 10% from the age of 3 years compared controls. No differences in AGD between groups. A paired absolute testes weight was reduced by approx. 70% in the TCDD groups compared to the control.<br><br><b>Semen quality and hormone levels.</b> Reduction in total sperm number (by 1/3 when compared to control) and in sperm concentration observed in male offspring from the high dose group. Slight decrease in sperm viability and activity and increase of semen volume and coagulum weight in both treatment groups. No obvious differences in mean circulatory testosterone, mean intra-testicular testosterone and DHT level.<br><br><b>Histopathology of the testis.</b> Reduction in paired testis weight, diameter of the seminiferous tubules and number of spermatids in seminiferous tubules (around 70, 89 and 77%, respectively) in the high dose group compared to controls. Very slight decrease in the number of spermatogonia and spermatocytes at 300 ng/kg, but no differences in the ratio of spermatogonia per Sertoli cell compared to controls.<br><br><b>Histopathology of the epididymis.</b> No differences in epididymal weight, but clearly smaller ductus epididymis in both treatment groups. The area of the ductus epididymis and cavity of the ductus epididymis at 30 and 300 ng/kg and the reserved sperm in the ductus epididymis in both treatment groups were reduced.<br><br>Risk of bias tier: 2<br><br><b>Histopathology of prostate.</b> No significant differences in the absolute or relative prostate weight of offspring exposed <i>in utero</i> and via lactation |
| <b>Arima et al. (2010).</b><br><i>In utero</i> and                                                                                                                                                      | Rhesus macaque                                                                                           | TCDD                                                                                                                                                                                                                                                                                                                                                                                                                                                               | 3 dose groups                                                                                                                                                                                                                                                                                                                                                                                                                   | Risk of bias tier: 2<br><br><b>Histopathology of prostate.</b> No significant differences in the absolute or relative prostate weight of offspring exposed <i>in utero</i> and via lactation                                                                                                                                                                                                                                                                                                                                                                                                                                                                                                                                                                                                                                                                                                                                                                                                                                                                                                                                                                                                                                                                                                                                                                                                                                                                                                                                                                                                                                                                                                                                                                                                                                                                                                                                                                                                                                                                                                                                                                                          |

| Reference                                                                                                                                               | Strain<br>Sex<br>Age<br>Study type                                                               | Compounds<br>Route admin<br>Dose regime<br>Duration                                                                                                                                                                                                                                                                                                                                                                               | Dose groups<br>Animals/group                                                                                                                 | Parameters measured and measures of effect<br><br>Tier of reliability                                                                                                                                                                                                                                                                                                                                                                                                                                                                                                                                                                                                                                                                                                                                                                                                                                                                                                                                    |
|---------------------------------------------------------------------------------------------------------------------------------------------------------|--------------------------------------------------------------------------------------------------|-----------------------------------------------------------------------------------------------------------------------------------------------------------------------------------------------------------------------------------------------------------------------------------------------------------------------------------------------------------------------------------------------------------------------------------|----------------------------------------------------------------------------------------------------------------------------------------------|----------------------------------------------------------------------------------------------------------------------------------------------------------------------------------------------------------------------------------------------------------------------------------------------------------------------------------------------------------------------------------------------------------------------------------------------------------------------------------------------------------------------------------------------------------------------------------------------------------------------------------------------------------------------------------------------------------------------------------------------------------------------------------------------------------------------------------------------------------------------------------------------------------------------------------------------------------------------------------------------------------|
| lactational exposure to 2,3,7,8-tetrachlorodibenzo- <i>p</i> -dioxin (TCDD) induces disruption of glands of the prostate and fibrosis in rhesus monkeys | ( <i>Macaca mulatta</i> )<br><br>F<br><br>4–10 years<br><br>Chronic ,<br>Developme<br>ntal study | <i>s.c.</i><br><br>0, 30, 300 ng/kg <i>s.c.</i> on GD20 and then 5 % of initial dose every 30 days during the gestation and lactation periods until PND90. The total dose administered to the higher dose group was 405 ng/kg (300 + 15 × 7 for dams with gestation length less than 170 days) or 420 ng/kg (300 + 15 × 8 for dams with gestation length 170 days or more) and that to the lower-dose group was 40.5 or 42 ng/kg. | Pregnant females<br>Control: n=23<br>Low-dose: n=20<br>High-dose: n=20<br>Additional high-dose: n=9<br><br>Observations in 3 offspring/group | at 0, 30 and 300 ng/kg.<br><br>Dose-dependent decrease in the number of glands of the prostate and a dose-dependent increase in interstitial tissue at 30 and 300 ng/kg (not significant).<br><br>Epithelial height of glands significantly decreased in both treatment groups (significant, however the effect was comparable in both groups).<br><br>Inflammatory cell infiltration in the glandular lumens, disruption of the glandular epithelium and a large number of fibroblasts at 300 ng/kg.<br><br><b>Global gene expression analysis in prostate in offspring.</b><br>Differential mRNA expression associated with fibrosis, inflammatory response and disruption of cell components.<br><br><b>mRNA expression levels of selected genes.</b> Up-regulation of TGM4, TGFB1, COL1A1 and MMP2 genes confirmed by quantitatively by real-time PCR analysis. All four genes had increased levels of expression in the 300 ng/kg group when compared with the control.<br><br>Risk of bias tier: 2 |

M: male; F: female.

(a): No tissues analysed but final concentration of the administered TCDD was confirmed by GC (data not presented).



## ANNEX A.7. RISK OF BIAS APPRAISAL OF STUDIES IN EXPERIMENTAL ANIMALS (RODENTS AND PRIMATES)

### A.7.1. Studies in rodents

**Table 62.** Risk of bias appraisal of studies in rats (score of one individual appraisal, unless indicated)  
Note: appraisal of individual studies focused only on risk of bias; additional quality aspects were considered when evaluating the overall confidence in the body of evidence (see Section 2.2.1.2 of the opinion).

| <b>Viluksela et al. (2000) <sup>(a)</sup></b> |                                                                                                                                                         | <b>Risk of bias tier: 1</b> |                                                                                                                                                                                                                                                                                                      |
|-----------------------------------------------|---------------------------------------------------------------------------------------------------------------------------------------------------------|-----------------------------|------------------------------------------------------------------------------------------------------------------------------------------------------------------------------------------------------------------------------------------------------------------------------------------------------|
| <b>Bias domain</b>                            | <b>Question</b>                                                                                                                                         | <b>Score</b>                | <b>Judgement</b>                                                                                                                                                                                                                                                                                     |
| Selection                                     | <b>KQ-A</b> - Was administered dose or exposure level adequately randomised? (including selection of groups during the study)?                          | +                           | No information on randomisation. Authors mentioned in their follow-up study (Jämsä et al., 2001) that animals in the current study are randomised.                                                                                                                                                   |
| Detection                                     | <b>KQ-B</b> - Can we be confident in the exposure characterisation?                                                                                     | ++                          | TCDD was analysed in the liver at termination and the targeted dosing was confirmed. Concentration data are presented in a figure, while tabulated TCDD-concentration data is provided in the follow-up study by Jämsä et al. (2001). Details on tissue extraction and analytical methods are given. |
| Detection                                     | <b>KQ-C</b> - Can we be confident in the outcome assessment?                                                                                            | +                           | Outcome data, including body and organ weight data, liver endpoints and related serum biochemistry, are well described and reported and so are the methods used for assessing the end-points. The complete data set is not tabulated but sometimes reported in figures or summarized in text.        |
| Confounding                                   | Did the study design or analyses account for important confounding and modifying variables (including unintended co-exposures) in experimental studies? | ++                          | TCDD purity >99% assessed by GC-MS; bought from Ufa oil institute. Confirmed no background contamination in animal room. No information on stability check of dosing solution.                                                                                                                       |
| Performance                                   | Were experimental conditions identical across study groups?                                                                                             | ++                          | Control and exposed animals had the same conditions including diet, dosing, vehicle, housing etc according to description.                                                                                                                                                                           |
| Performance                                   | Were the outcome assessors blinded to study group or exposure level?                                                                                    | -                           | Insufficient information on blinding.                                                                                                                                                                                                                                                                |
| Attrition/exclusion                           | Were outcome data completely reported without attrition or exclusion from analysis?                                                                     | +                           | Number of animals are given in methods, tables and sometimes also in figures. 1 animal in 1 strain died/was killed.                                                                                                                                                                                  |
| Selective reporting                           | Were all measured outcomes reported?                                                                                                                    | +                           | All data reported; sometimes in figures only.                                                                                                                                                                                                                                                        |
| Other bias                                    | Were statistical methods appropriate?                                                                                                                   | ++                          | Statistical analyses by appropriate standard methods                                                                                                                                                                                                                                                 |
| <b>Jämsä et al. (2001)</b>                    |                                                                                                                                                         | <b>Risk of bias Tier: 1</b> |                                                                                                                                                                                                                                                                                                      |
| <b>Bias domain</b>                            | <b>Question</b>                                                                                                                                         | <b>Score</b>                | <b>Judgement</b>                                                                                                                                                                                                                                                                                     |
| Selection                                     | <b>KQ-A</b> - Was administered dose or exposure level adequately randomised? (including selection of groups during the study)?                          | +                           | Some information on randomisation is given. The bones used are from the animals of the study by Viluksela et al. (2000).                                                                                                                                                                             |
| Detection                                     | <b>KQ-B</b> - Can we be confident in the exposure characterisation?                                                                                     | ++                          | TCDD was analysed in the liver at termination for all animals individually in the study and the targeted dosing was confirmed. Concentration data are                                                                                                                                                |

|                                             |                                                                                                                                                         |                             |                                                                                                                                                                                                |
|---------------------------------------------|---------------------------------------------------------------------------------------------------------------------------------------------------------|-----------------------------|------------------------------------------------------------------------------------------------------------------------------------------------------------------------------------------------|
|                                             |                                                                                                                                                         |                             | tabulated. More details on tissue extraction and analytical methods are given in the mother study by Viluksela et al. (2000), who also provide TCDD tissue concentration data in figure-format |
| Detection                                   | <b>KQ-C</b> - Can we be confident in the outcome assessment?                                                                                            | ++                          | Outcome data, including bone geometry, density, histology and biomechanical results, are well described and reported. The methods used for assessing the effects were well described.          |
| Confounding                                 | Did the study design or analyses account for important confounding and modifying variables (including unintended co-exposures) in experimental studies? | ++                          | TCDD purity >99% assessed by GC-MS; bought from Ufa oil institute. Confirmed no background contamination in animal room. No information on stability check of dosing solution                  |
| Performance                                 | Were experimental conditions identical across study groups?                                                                                             | ++                          | Control and exposed animals had the same conditions in diet dosing, vehicle, housing, etc according to description.                                                                            |
| Performance                                 | Were the outcome assessors blinded to study group or exposure level?                                                                                    | -                           | Not mentioned/Insufficient information on blinding.                                                                                                                                            |
| Attrition/exclusion                         | Were outcome data completely reported without attrition or exclusion from analysis?                                                                     | +                           | Number of animals are given in methods, tables and sometimes also in figures)                                                                                                                  |
| Selective reporting                         | Were all measured outcomes reported?                                                                                                                    | +                           | All data reported. Sometimes figures only                                                                                                                                                      |
| Other bias                                  | Were statistical methods appropriate?                                                                                                                   | ++                          | Statistical analyses by appropriate standard methods                                                                                                                                           |
| <b>Harrill et al. (2016) <sup>(a)</sup></b> |                                                                                                                                                         | <b>Risk of bias tier: 1</b> |                                                                                                                                                                                                |
| <b>Bias domain</b>                          | <b>Question</b>                                                                                                                                         | <b>Score</b>                | <b>Judgement</b>                                                                                                                                                                               |
| Selection                                   | <b>KQ-A</b> - Was administered dose or exposure level adequately randomised? (including selection of groups during the study)?                          | +                           | Stated that animals were randomized, however exact method not specified.                                                                                                                       |
| Detection                                   | <b>KQ-B</b> - Can we be confident in the exposure characterisation?                                                                                     | ++                          | TCDD concentrations were analysed and reported for liver and adipose tissue.                                                                                                                   |
| Detection                                   | <b>KQ-C</b> - Can we be confident in the outcome assessment?                                                                                            | ++                          | Endpoints determined as in regulatory toxicology studies, including body and tissue weights, histopathology, hematology and serum chemistry.                                                   |
| Confounding                                 | Did the study design or analyses account for important confounding and modifying variables (including unintended co-exposures) in experimental studies? | ++                          | 99.1% pure TCDD purchased. Careful check of dosing solutions over course of the study (each lot within 20% of target concentration).                                                           |
| Performance                                 | Were experimental conditions identical across study groups?                                                                                             | ++                          | Control and exposed animals had the same conditions, including dosing, vehicle and other experimental conditions.                                                                              |
| Performance                                 | Were the outcome assessors blinded to study group or exposure level?                                                                                    | +                           | Insufficient information on blinding, however study was performed by different independent contractors.                                                                                        |
| Attrition/exclusion                         | Were outcome data completely reported without attrition or exclusion from analysis?                                                                     | ++                          | N is given for all groups in tables/text.                                                                                                                                                      |
| Selective reporting                         | Were all measured outcomes reported?                                                                                                                    | +                           | Tissues from some organs stored for possible future evaluation. Urinary tract histology was not shown.                                                                                         |
| Other bias                                  | Were statistical methods appropriate?                                                                                                                   | +                           | Statistical analyses by common methods appropriate for the study.                                                                                                                              |

| <b>Phadnis and Moghe et al. (2016)</b> |                                                                                                                                                         | <b>Risk of bias tier: 1</b> |                                                                                                                                                                                                                                                                                                                                                                                                                                                                                                                                                                                                           |
|----------------------------------------|---------------------------------------------------------------------------------------------------------------------------------------------------------|-----------------------------|-----------------------------------------------------------------------------------------------------------------------------------------------------------------------------------------------------------------------------------------------------------------------------------------------------------------------------------------------------------------------------------------------------------------------------------------------------------------------------------------------------------------------------------------------------------------------------------------------------------|
| <b>Bias domain</b>                     | <b>Question</b>                                                                                                                                         | <b>Score</b>                | <b>Judgement</b>                                                                                                                                                                                                                                                                                                                                                                                                                                                                                                                                                                                          |
| Selection                              | <b>KQ-A</b> - Was administered dose or exposure level adequately randomised? (including selection of groups during the study)?                          | +                           | Authors confirm this was conducted on the same animals as described by Harrill et al. (2016). Animals were randomized but method not specified.                                                                                                                                                                                                                                                                                                                                                                                                                                                           |
| Detection                              | <b>KQ-B</b> - Can we be confident in the exposure characterisation?                                                                                     | ++                          | Described in Harrill et al. (2016)                                                                                                                                                                                                                                                                                                                                                                                                                                                                                                                                                                        |
| Detection                              | <b>KQ-C</b> - Can we be confident in the outcome assessment?                                                                                            | ++                          | The methods used for assessing the effects were well described and according generally accepted protocols.                                                                                                                                                                                                                                                                                                                                                                                                                                                                                                |
| Confounding                            | Did the study design or analyses account for important confounding and modifying variables (including unintended co-exposures) in experimental studies? | ++                          | 99.1% pure TCDD purchased. Careful check of dosing solutions over course of the study (each lot within 20% of target concentration) as in Harrill et al. (2016).                                                                                                                                                                                                                                                                                                                                                                                                                                          |
| Performance                            | Were experimental conditions identical across study groups?                                                                                             | +                           | Animals were exposed to different concentrations of TCDD in corn oil. There is no specific mention of identical other treatment of the different groups, but it can be assumed that they are.                                                                                                                                                                                                                                                                                                                                                                                                             |
| Performance                            | Were the outcome assessors blinded to study group or exposure level?                                                                                    | -                           | There is no indication of blinding of personnel carrying out the analysis. Bias may have occurred therefore with respect to thymus and spleen weight. It is not envisioned that bias could have influenced the cell culture activation, proliferation, and flow cytometry. However, flow cytometry was repeated once. The scores of the separate experiments were not given, but the two analyses were combined. It is unclear why this was. Whereas Facs analyses may give some variation, it cannot be excluded that this was done in order to see some results that were not there in the first round. |
| Attrition/exclusion                    | Were outcome data completely reported without attrition or exclusion from analysis?                                                                     | +                           | The number of animals per group was 5. Facs analysis was repeated once, and again the N was 5, these results were combined. No numbers were indicated in any of the figures. There was no mention of missing animals or data.                                                                                                                                                                                                                                                                                                                                                                             |
| Selective reporting                    | Were all measured outcomes reported?                                                                                                                    | -                           | There is no mention of missing information. However, never in the figures the real numbers were indicated.                                                                                                                                                                                                                                                                                                                                                                                                                                                                                                |
| Other bias                             | Were statistical methods appropriate?                                                                                                                   | ++                          | Appropriate.                                                                                                                                                                                                                                                                                                                                                                                                                                                                                                                                                                                              |
| <b>NTP (2006)</b>                      |                                                                                                                                                         | <b>Risk of bias tier: 1</b> |                                                                                                                                                                                                                                                                                                                                                                                                                                                                                                                                                                                                           |
| <b>Bias domain</b>                     | <b>Question</b>                                                                                                                                         | <b>Score</b>                | <b>Judgement</b>                                                                                                                                                                                                                                                                                                                                                                                                                                                                                                                                                                                          |
| Selection                              | <b>KQ-A</b> - Was administered dose or exposure level adequately randomised? (including selection of groups during the study)?                          | +                           | Rats described as being randomized but no details. Concurrent control group with identical treatment and weight distribution. Male rats included, but not treated, to ensure normal oestrus cycling of all females                                                                                                                                                                                                                                                                                                                                                                                        |
| Detection                              | <b>KQ-B</b> - Can we be confident in the exposure characterisation?                                                                                     | ++                          | Purity >98% and fully characterised chemically. Impurities identified. Stability of TCDD determined on batches at least every 3 months.                                                                                                                                                                                                                                                                                                                                                                                                                                                                   |
| Detection                              | <b>KQ-C</b> - Can we be confident in the outcome assessment?                                                                                            | +                           | Critical histopathological examinations and categorisations were performed independently by laboratory and quality assessment pathologists. Inconsistencies were referred to a NTP pathology Working Group who reviewed slides independent of knowledge of dose or previous assessment. Members were experienced in other NTP studies to ensure consistency of diagnoses.                                                                                                                                                                                                                                 |
| Confounding                            | Did the study design or analyses account for                                                                                                            | ++                          | Diets identical and periodically analysed for feed composition and contaminants. Cages were changed                                                                                                                                                                                                                                                                                                                                                                                                                                                                                                       |

|                     |                                                                                                            |    |                                                                                                                                                                                                                                                                                                                                                                                                                                                              |
|---------------------|------------------------------------------------------------------------------------------------------------|----|--------------------------------------------------------------------------------------------------------------------------------------------------------------------------------------------------------------------------------------------------------------------------------------------------------------------------------------------------------------------------------------------------------------------------------------------------------------|
|                     | important confounding and modifying variables (including unintended co-exposures) in experimental studies? |    | and rotated to different racks every 2 weeks to ensure consistent environmental conditions                                                                                                                                                                                                                                                                                                                                                                   |
| Performance         | Were experimental conditions identical across study groups?                                                | ++ | Identical vehicle used for test and controls (99:1 corn oil; acetone). TCDD compositions of dose batches and stabilities analysed at least every 3 months in 2 year study.                                                                                                                                                                                                                                                                                   |
| Performance         | Were the outcome assessors blinded to study group or exposure level?                                       | ++ | Analyses of various laboratories parameters undertaken by different contract labs. Critical histopathological examinations and categorisations were performed independently by laboratory and quality assessment pathologists. Inconsistencies were referred to a NTP pathology Working Group who reviewed slides independent of knowledge of dose or previous assessment. Members were experienced in other NTP studies to ensure consistency of diagnoses. |
| Attrition/exclusion | Were outcome data completely reported without attrition or exclusion from analysis?                        | ++ | Very high survival rate and each fully reported.                                                                                                                                                                                                                                                                                                                                                                                                             |
| Selective reporting | Were all measured outcomes reported?                                                                       | ++ | Fully reported. The study was conducted in compliance with FDA regulations. Records were submitted to NTP Archives and audited by an independent quality assurance contractor.                                                                                                                                                                                                                                                                               |

**Faqi et al. (1998b)****Risk of bias tier: 1**

| Bias domain         | Question                                                                                                                                                | Score | Judgement                                                                                                                                                         |
|---------------------|---------------------------------------------------------------------------------------------------------------------------------------------------------|-------|-------------------------------------------------------------------------------------------------------------------------------------------------------------------|
| Selection           | <b>KQ-A</b> - Was administered dose or exposure level adequately randomised? (including selection of groups during the study)?                          | +     | Randomization of animals to exposure groups, but methods of randomization were not given.                                                                         |
| Detection           | <b>KQ-B</b> - Can we be confident in the exposure characterisation?                                                                                     | ++    | Purity was 97%, in addition, liver and fat tissue TCDD content was measured after exposure.                                                                       |
| Detection           | <b>KQ-C</b> - Can we be confident in the outcome assessment?                                                                                            | +     | Sperm analysis was performed manually (Haemocytometer).                                                                                                           |
| Confounding         | Did the study design or analyses account for important confounding and modifying variables (including unintended co-exposures) in experimental studies? | +     | Purity of the chemical 97%.                                                                                                                                       |
| Performance         | Were experimental conditions identical across study groups?                                                                                             | ++    | Groups were treated identically.                                                                                                                                  |
| Performance         | Were the outcome assessors blinded to study group or exposure level?                                                                                    | -     | Blinding was not described in the manuscript.                                                                                                                     |
| Attrition/exclusion | Were outcome data completely reported without attrition or exclusion from analysis?                                                                     | ++    | All animals remained in the groups throughout the study.                                                                                                          |
| Selective reporting | Were all measured outcomes reported?                                                                                                                    | ++    | Values for all parameters indicated were provided                                                                                                                 |
| Other bias          | Were statistical methods appropriate?                                                                                                                   | +     | Statistical evaluation seems adequate, although correction for multiple testing was not provided. It seems that correction would not have influenced the results. |

**Nohara et al. (2003)****Risk of bias tier: 1**

| Bias domain | Question | Score | Judgement |
|-------------|----------|-------|-----------|
|-------------|----------|-------|-----------|

|                            |                                                                                                                                                         |                             |                                                                                                                                  |
|----------------------------|---------------------------------------------------------------------------------------------------------------------------------------------------------|-----------------------------|----------------------------------------------------------------------------------------------------------------------------------|
| Selection                  | <b>KQ-A</b> - Was administered dose or exposure level adequately randomised? (including selection of groups during the study)?                          | +                           | Author mention that offspring were randomly reduced to 8 pups.                                                                   |
| Detection                  | <b>KQ-B</b> - Can we be confident in the exposure characterisation?                                                                                     | +                           | GC-MS method for analyses of TCDD tissue concentrations is well described and data are presented in Table 3.                     |
| Detection                  | <b>KQ-C</b> - Can we be confident in the outcome assessment?                                                                                            | +                           | Several novel end-points, which still are lacking status as "gold standard".                                                     |
| Confounding                | Did the study design or analyses account for important confounding and modifying variables (including unintended co-exposures) in experimental studies? | +                           | No reason to believe there was significant co-exposure, yet more details could have been given including also type of diet, etc. |
| Performance                | Were experimental conditions identical across study groups?                                                                                             | ++                          | Control and exposed animals had the same conditions including vehicle according to description.                                  |
| Performance                | Were the outcome assessors blinded to study group or exposure level?                                                                                    | -                           | Insufficient information on blinding.                                                                                            |
| Attrition/exclusion        | Were outcome data completely reported without attrition or exclusion from analysis?                                                                     | +                           | There is reporting about the number of pups in the individual F1-groups in foot notes.                                           |
| Selective reporting        | Were all measured outcomes reported?                                                                                                                    | +                           | All data reported.                                                                                                               |
| Other bias                 | Were statistical methods appropriate?                                                                                                                   | +                           | Statistical analyses by appropriate methods. Could have included more detailed dose-response analyses.                           |
| <b>Bell et al. (2007a)</b> |                                                                                                                                                         | <b>Risk of bias tier: 1</b> |                                                                                                                                  |
| <b>Bias domain</b>         | <b>Question</b>                                                                                                                                         | <b>Score</b>                | <b>Judgement</b>                                                                                                                 |
| Selection                  | <b>KQ-A</b> - Was administered dose or exposure level adequately randomised? (including selection of groups during the study)?                          | +                           | F0 animals randomised. Use/randomisation of F1-pups not totally clear.                                                           |
| Detection                  | <b>KQ-B</b> - Can we be confident in the exposure characterisation?                                                                                     | +                           | Purity not mentioned in this publication. However mentioned in Bell et al. (2007) to be 99%. Purity verified by HRMS.            |
| Detection                  | <b>KQ-C</b> - Can we be confident in the outcome assessment?                                                                                            | ++                          |                                                                                                                                  |
| Confounding                | Did the study design or analyses account for important confounding and modifying variables (including unintended co-exposures) in experimental studies? | +                           | Chemicals highest quality available<br>Standard lab diet.                                                                        |
| Performance                | Were experimental conditions identical across study groups?                                                                                             | ++                          |                                                                                                                                  |
| Performance                | Were the outcome assessors blinded to study group or exposure level?                                                                                    | +                           | Not mentioned (maybe described in SOP).                                                                                          |
| Attrition/exclusion        | Were outcome data completely reported without attrition or exclusion from analysis?                                                                     | ++                          |                                                                                                                                  |
| Selective reporting        | Were all measured outcomes reported?                                                                                                                    | ++                          | GLP.                                                                                                                             |
| Other bias                 | Were statistical methods                                                                                                                                | ++                          |                                                                                                                                  |

| appropriate?                   |                                                                                                                                                         |                             |                                                                                                                                                          |
|--------------------------------|---------------------------------------------------------------------------------------------------------------------------------------------------------|-----------------------------|----------------------------------------------------------------------------------------------------------------------------------------------------------|
| <b>Bell et al. (2007b)</b>     |                                                                                                                                                         | <b>Risk of bias tier: 1</b> |                                                                                                                                                          |
| <b>Bias domain</b>             | <b>Question</b>                                                                                                                                         | <b>Score</b>                | <b>Judgement</b>                                                                                                                                         |
| Selection                      | <b>KQ-A</b> - Was administered dose or exposure level adequately randomised? (including selection of groups during the study)?                          | +                           | F0 females randomised. Use/randomisation of F1-pups not totally clear.                                                                                   |
| Detection                      | <b>KQ-B</b> - Can we be confident in the exposure characterisation?                                                                                     | +                           | Purity not mentioned in this publication. However mentioned in Bell et al. (2007c) to be 99%. Purity verified by HRMS.                                   |
| Detection                      | <b>KQ-C</b> - Can we be confident in the outcome assessment?                                                                                            | ++                          |                                                                                                                                                          |
| Confounding                    | Did the study design or analyses account for important confounding and modifying variables (including unintended co-exposures) in experimental studies? | +                           | Chemicals highest quality available<br>Standard lab diet.                                                                                                |
| Performance                    | Were experimental conditions identical across study groups?                                                                                             | ++                          |                                                                                                                                                          |
| Performance                    | Were the outcome assessors blinded to study group or exposure level?                                                                                    | +                           | Not mentioned (maybe described in SOP).                                                                                                                  |
| Attrition/<br>exclusion        | Were outcome data completely reported without attrition or exclusion from analysis?                                                                     | ++                          |                                                                                                                                                          |
| Selective reporting            | Were all measured outcomes reported?                                                                                                                    | ++                          | GLP.                                                                                                                                                     |
| Other bias                     | Were statistical methods appropriate?                                                                                                                   | ++                          | Accounted for litter effects.                                                                                                                            |
| <b>Rebourcet et al. (2010)</b> |                                                                                                                                                         | <b>Risk of bias tier: 2</b> |                                                                                                                                                          |
| <b>Bias domain</b>             | <b>Question</b>                                                                                                                                         | <b>Score</b>                | <b>Judgement</b>                                                                                                                                         |
| Selection                      | <b>KQ-A</b> - Was administered dose or exposure level adequately randomised? (including selection of groups during the study)?                          | +                           | Data on F1 not presented therefore it cannot be confirmed that all F1 animals were mated or used in the study.                                           |
| Detection                      | <b>KQ-B</b> - Can we be confident in the exposure characterisation?                                                                                     | +                           |                                                                                                                                                          |
| Detection                      | <b>KQ-C</b> - Can we be confident in the outcome assessment?                                                                                            | +                           |                                                                                                                                                          |
| Confounding                    | Did the study design or analyses account for important confounding and modifying variables (including unintended co-exposures) in experimental studies? | -                           | The number of animals in the low and mid dose group too low.                                                                                             |
| Performance                    | Were experimental conditions identical across study groups?                                                                                             | +                           |                                                                                                                                                          |
| Performance                    | Were the outcome assessors blinded to study group or exposure level?                                                                                    | -                           | Blinding not mentioned                                                                                                                                   |
| Attrition/<br>exclusion        | Were outcome data completely reported without attrition or exclusion from                                                                               | -                           | Not clear what happened to 4 out of 9 litters in the control and TCDD 200 groups; may be all used for measurement of relative expression by Cyp1a1 by Q- |



|                     |                                       |   |                                       |
|---------------------|---------------------------------------|---|---------------------------------------|
|                     | analysis?                             |   | PCR. Reproductive data not presented. |
| Selective reporting | Were all measured outcomes reported?  | - | See Attrition/exclusion bias.         |
| Other bias          | Were statistical methods appropriate? | + |                                       |

(a): Combined score of two independent appraisals.

**Table 63.** Risk of bias appraisal of studies in mice (combined score of two independent appraisals) Note: appraisal of individual studies focused only on risk of bias; additional quality aspects were considered when evaluating the overall confidence in the body of evidence (see Section 2.2.1.2 of the opinion).

| Li et al. (2006)    |                                                                                                                                                         | Risk of bias tier: 1 |                                                                                                                                                                 |
|---------------------|---------------------------------------------------------------------------------------------------------------------------------------------------------|----------------------|-----------------------------------------------------------------------------------------------------------------------------------------------------------------|
| Bias domain         | Question                                                                                                                                                | Score                | Judgement                                                                                                                                                       |
| Selection           | <b>KQ-A</b> - Was administered dose or exposure level adequately randomised? (including selection of groups during the study)?                          | +                    | Number of animals assigned to each group not mentioned. Tables mention 10 pregnant animals/group.                                                               |
| Detection           | <b>KQ-B</b> - Can we be confident in the exposure characterisation?                                                                                     | +                    | AhR reporter assay was used. Several tissues were analysed. Purity of test substance given.                                                                     |
| Detection           | <b>KQ-C</b> - Can we be confident in the outcome assessment?                                                                                            | +                    | Several novel end-points, which still are lacking status as "gold standard". Making reference to methodology text book and publications.                        |
| Confounding         | Did the study design or analyses account for important confounding and modifying variables (including unintended co-exposures) in experimental studies? | +                    | TCDD from Accustandard given by gavage in sesame oil, yet more details could have been given including also type of diet, feeding regimen, drinking water etc.  |
| Performance         | Were experimental conditions identical across study groups?                                                                                             | ++                   | Control and exposed animals had the same conditions including vehicle according to description.                                                                 |
| Performance         | Were the outcome assessors blinded to study group or exposure level?                                                                                    | -                    | Insufficient/no information on blinding.                                                                                                                        |
| Attrition/exclusion | Were outcome data completely reported without attrition or exclusion from analysis?                                                                     | +                    | Number of animals at start study not described. There is reporting about the number of dams in most figures. Could have been better described across the paper. |
| Selective reporting | Were all measured outcomes reported?                                                                                                                    | +                    | Assumed all data reported. Animals at start study not known.                                                                                                    |
| Other bias          | Were statistical methods appropriate?                                                                                                                   | +                    | Statistical analyses by common methods. Use of SEM should be replaced by SD. Could have included more detailed dose-response analyses.                          |

### A.7.2. Studies in primates

**Table 64.** Risk of bias appraisal of studies in monkeys (score of one individual appraisal). Note: appraisal of individual studies focused only on risk of bias; additional quality aspects were considered when evaluating the overall confidence in the body of evidence (see Section 2.2.1.2 of the opinion).

| Yasuda et al. (2005) |                                        | Risk of bias tier: 2 |                                            |
|----------------------|----------------------------------------|----------------------|--------------------------------------------|
| Bias domain          | Question                               | Score                | Judgement                                  |
| Selection            | <b>KQ-A</b> - Was administered dose or | -                    | Only mentioned animals were divided into 3 |



|                               |                                                                                                                                                         |                             |                                                                                                                                                                                     |
|-------------------------------|---------------------------------------------------------------------------------------------------------------------------------------------------------|-----------------------------|-------------------------------------------------------------------------------------------------------------------------------------------------------------------------------------|
|                               | exposure level adequately randomised? (including selection of groups during the study)?                                                                 |                             | groups. Additional high-dose group added.                                                                                                                                           |
| Detection                     | <b>KQ-B</b> - Can we be confident in the exposure characterisation?                                                                                     | +                           |                                                                                                                                                                                     |
| Detection                     | <b>KQ-C</b> - Can we be confident in the outcome assessment?                                                                                            | +                           |                                                                                                                                                                                     |
| Confounding                   | Did the study design or analyses account for important confounding and modifying variables (including unintended co-exposures) in experimental studies? | +                           | Diet from official supplier Harlan Teklan, Sprague Dawley Inc, USA. Diet analyses not described. Contamination between groups also not described.                                   |
| Performance                   | Were experimental conditions identical across study groups?                                                                                             | +                           | It was not described how animals divided over the different rooms.                                                                                                                  |
| Performance                   | Were the outcome assessors blinded to study group or exposure level?                                                                                    | +                           |                                                                                                                                                                                     |
| Attrition/exclusion           | Were outcome data completely reported without attrition or exclusion from analysis?                                                                     | -                           | In the text it is described that there are two survivors among the offspring of the additional group. However, in Table 4 there are three.                                          |
| Selective reporting           | Were all measured outcomes reported?                                                                                                                    | +                           |                                                                                                                                                                                     |
| Other bias                    | Were statistical methods appropriate?                                                                                                                   | +                           |                                                                                                                                                                                     |
| <b>Korenaga et al. (2007)</b> |                                                                                                                                                         | <b>Risk of bias tier: 2</b> |                                                                                                                                                                                     |
| <b>Bias domain</b>            | <b>Question</b>                                                                                                                                         | <b>Score</b>                | <b>Judgement</b>                                                                                                                                                                    |
| Selection                     | <b>KQ-A</b> - Was administered dose or exposure level adequately randomised? (including selection of groups during the study)?                          | -                           | Only mentioned animals were divided into 3 groups. Additional high-dose group added. Selection of 3 control, 4 low-dose, and 3 high-dose adult females liver effects not described. |
| Detection                     | <b>KQ-B</b> - Can we be confident in the exposure characterisation?                                                                                     | +                           |                                                                                                                                                                                     |
| Detection                     | <b>KQ-C</b> - Can we be confident in the outcome assessment?                                                                                            | -                           | The number of effects observed in the control group is not explained. Most obviously no blinding is used.                                                                           |
| Confounding                   | Did the study design or analyses account for important confounding and modifying variables (including unintended co-exposures) in experimental studies? | +                           | Diet from official supplier Harlan Teklan, Sprague Dawley Inc, USA. Diet analyses not described. Contamination between groups also not described.                                   |
| Performance                   | Were experimental conditions identical across study groups?                                                                                             | +                           | It was not described how animals divided over the different rooms.                                                                                                                  |
| Performance                   | Were the outcome assessors blinded to study group or exposure level?                                                                                    | +                           |                                                                                                                                                                                     |
| Attrition/exclusion           | Were outcome data completely reported without attrition or exclusion from analysis?                                                                     | +                           |                                                                                                                                                                                     |
| Selective reporting           | Were all measured outcomes reported?                                                                                                                    | +                           |                                                                                                                                                                                     |
| Other bias                    | Were statistical methods appropriate?                                                                                                                   | +                           |                                                                                                                                                                                     |
| <b>Hermesen et al. (2008)</b> |                                                                                                                                                         | <b>Risk of bias tier: 2</b> |                                                                                                                                                                                     |
| <b>Bias domain</b>            | <b>Question</b>                                                                                                                                         | <b>Score</b>                | <b>Judgement</b>                                                                                                                                                                    |
| Selection                     | <b>KQ-A</b> - Was administered dose or exposure level adequately randomised? (including selection of groups during the study)?                          | -                           | Only mentioned animals were divided into 3 groups. Additional high-dose group added.                                                                                                |
| Detection                     | <b>KQ-B</b> - Can we be confident in the exposure characterisation?                                                                                     | +                           |                                                                                                                                                                                     |
| Detection                     | <b>KQ-C</b> - Can we be confident in the outcome assessment?                                                                                            | ++                          |                                                                                                                                                                                     |

|                              |                                                                                                                                                         |                             |                                                                                                                                                                                                                                |
|------------------------------|---------------------------------------------------------------------------------------------------------------------------------------------------------|-----------------------------|--------------------------------------------------------------------------------------------------------------------------------------------------------------------------------------------------------------------------------|
| Confounding                  | Did the study design or analyses account for important confounding and modifying variables (including unintended co-exposures) in experimental studies? | +                           | Diet from official supplier Harlan Teklan, Sprague Dawley Inc, USA. Diet analyses not described. Contamination between groups also not described.                                                                              |
| Performance                  | Were experimental conditions identical across study groups?                                                                                             | +                           | It was not described how animals divided over the different rooms.                                                                                                                                                             |
| Performance                  | Were the outcome assessors blinded to study group or exposure level?                                                                                    | +                           |                                                                                                                                                                                                                                |
| Attrition/exclusion          | Were outcome data completely reported without attrition or exclusion from analysis?                                                                     | -                           | The selection of offspring for this parameter is not clear (in Table 4 of Yasuda 2009) a higher number of survivors is described.                                                                                              |
| Selective reporting          | Were all measured outcomes reported?                                                                                                                    | ++                          |                                                                                                                                                                                                                                |
| Other bias                   | Were statistical methods appropriate?                                                                                                                   | ++                          |                                                                                                                                                                                                                                |
| <b>Negishi et al. (2006)</b> |                                                                                                                                                         | <b>Risk of bias tier: 2</b> |                                                                                                                                                                                                                                |
| <b>Bias domain</b>           | <b>Question</b>                                                                                                                                         | <b>Score</b>                | <b>Judgement</b>                                                                                                                                                                                                               |
| Selection                    | <b>KQ-A</b> - Was administered dose or exposure level adequately randomised? (including selection of groups during the study)?                          | -                           | Only mentioned animals were divided into 3 groups. Selection of offspring is not clear and also the number of offspring tested in the eye contact test.                                                                        |
| Detection                    | <b>KQ-B</b> - Can we be confident in the exposure characterisation?                                                                                     | +                           |                                                                                                                                                                                                                                |
| Detection                    | <b>KQ-C</b> - Can we be confident in the outcome assessment?                                                                                            | -                           | Not clear especially as in the behaviour encounter test the number of animals/groups were not described. Sex can be important in this kind of testing.                                                                         |
| Confounding                  | Did the study design or analyses account for important confounding and modifying variables (including unintended co-exposures) in experimental studies? | +                           | Diet from official supplier Harlan Teklan, Sprague Dawley Inc, USA. Diet analyses not described. Contamination between groups also not described.                                                                              |
| Performance                  | Were experimental conditions identical across study groups?                                                                                             | +                           | It was not described how animals divided over the different rooms; also not of the infants as this is important for behavioural testing.                                                                                       |
| Performance                  | Were the outcome assessors blinded to study group or exposure level?                                                                                    | -                           | Not described                                                                                                                                                                                                                  |
| Attrition/exclusion          | Were outcome data completely reported without attrition or exclusion from analysis?                                                                     | -                           | Not clear especially as in the behaviour encounter test the number of animals /group were not described.                                                                                                                       |
| Selective reporting          | Were all measured outcomes reported?                                                                                                                    | +                           |                                                                                                                                                                                                                                |
| Other bias                   | Were statistical methods appropriate?                                                                                                                   | +                           |                                                                                                                                                                                                                                |
| <b>Arima et al. (2010)</b>   |                                                                                                                                                         | <b>Risk of bias tier: 2</b> |                                                                                                                                                                                                                                |
| <b>Bias domain</b>           | <b>Question</b>                                                                                                                                         | <b>Score</b>                | <b>Judgement</b>                                                                                                                                                                                                               |
| Selection                    | <b>KQ-A</b> - Was administered dose or exposure level adequately randomised? (including selection of groups during the study)?                          | -                           | Only mentioned animals were divided into 3 groups. Additional high-dose group which was mentioned in Yoshida et al. not described. Prostate glands of 3 offspring were evaluated. Not presented how these animals were chosen. |
| Detection                    | <b>KQ-B</b> - Can we be confident in the exposure characterisation?                                                                                     | +                           |                                                                                                                                                                                                                                |
| Detection                    | <b>KQ-C</b> - Can we be confident in the outcome assessment?                                                                                            | +                           |                                                                                                                                                                                                                                |
| Confounding                  | Did the study design or analyses account for important confounding and modifying variables (including                                                   | +                           | Diet from official supplier Harlan Teklan, Sprague Dawley Inc, USA. Diet analyses not described. Contamination between groups also                                                                                             |

|                            |                                                                                                                                                         |                             |                                                                                                                                                                                                                               |
|----------------------------|---------------------------------------------------------------------------------------------------------------------------------------------------------|-----------------------------|-------------------------------------------------------------------------------------------------------------------------------------------------------------------------------------------------------------------------------|
|                            | unintended co-exposures) in experimental studies?                                                                                                       |                             | not described.                                                                                                                                                                                                                |
| Performance                | Were experimental conditions identical across study groups?                                                                                             | +                           | It was not described how animals divided over the different rooms.                                                                                                                                                            |
| Performance                | Were the outcome assessors blinded to study group or exposure level?                                                                                    | -                           | Not described                                                                                                                                                                                                                 |
| Attrition/<br>exclusion    | Were outcome data completely reported without attrition or exclusion from analysis?                                                                     | -                           | No reason presented for the different number of offspring tested for different parameters.                                                                                                                                    |
| Selective reporting        | Were all measured outcomes reported?                                                                                                                    | -                           | Only 3 animals chosen selection not described.                                                                                                                                                                                |
| Other bias                 | Were statistical methods appropriate?                                                                                                                   | +                           |                                                                                                                                                                                                                               |
| <b>Arima et al. (2009)</b> |                                                                                                                                                         | <b>Risk of bias tier: 2</b> |                                                                                                                                                                                                                               |
| <b>Bias domain</b>         | <b>Question</b>                                                                                                                                         | <b>Score</b>                | <b>Judgement</b>                                                                                                                                                                                                              |
| Selection                  | <b>KQ-A</b> - Was administered dose or exposure level adequately randomised? (including selection of groups during the study)?                          | -                           | Only mentioned animals were divided into 3 groups. Additional high-dose group which was mentioned in Yoshida et al. not described. No reason presented for the different number of offspring tested for different parameters. |
| Detection                  | <b>KQ-B</b> - Can we be confident in the exposure characterisation?                                                                                     | +                           |                                                                                                                                                                                                                               |
| Detection                  | <b>KQ-C</b> - Can we be confident in the outcome assessment?                                                                                            | -                           | Anogenital distance and sperm analyses.                                                                                                                                                                                       |
| Confounding                | Did the study design or analyses account for important confounding and modifying variables (including unintended co-exposures) in experimental studies? | +                           | Diet from official supplier Harlan Teklan, Sprague Dawley Inc, USA. Diet analyses not described. Contamination between groups also not described.                                                                             |
| Performance                | Were experimental conditions identical across study groups?                                                                                             | +                           | It was not described how animals divided over the different rooms.                                                                                                                                                            |
| Performance                | Were the outcome assessors blinded to study group or exposure level?                                                                                    | -                           | Anogenital distance and sperm analysis not blinded.                                                                                                                                                                           |
| Attrition/<br>exclusion    | Were outcome data completely reported without attrition or exclusion from analysis?                                                                     | -                           | No reason presented for the different number of offspring tested for different parameters.                                                                                                                                    |
| Selective reporting        | Were all measured outcomes reported?                                                                                                                    | -                           | Different number of animals.                                                                                                                                                                                                  |
| Other bias                 | Were statistical methods appropriate?                                                                                                                   | +                           |                                                                                                                                                                                                                               |

## ANNEX A.8. EPIDEMIOLOGICAL STUDIES

### A.8.1. Studies on male reproductive effects

**Table 65.** Epidemiological studies on the association between exposure to PCDD/Fs and DL-PCBs and **male reproductive effects**. Details about the risk of bias appraisal can be found in Annex A.9.1.

| Reference<br>Trial or study name<br>(geography)                                                                                                                                                                                       | Study type<br>Duration     | Participants in the study                                    | Compounds                         | Levels of exposure                             | Parameters measured and Measures of effect                                                                                                                                                                       |
|---------------------------------------------------------------------------------------------------------------------------------------------------------------------------------------------------------------------------------------|----------------------------|--------------------------------------------------------------|-----------------------------------|------------------------------------------------|------------------------------------------------------------------------------------------------------------------------------------------------------------------------------------------------------------------|
|                                                                                                                                                                                                                                       |                            | Age at outcome assessment (years)<br>Year of tissue sampling | Measurement of Exposure           |                                                | Risk of bias tier                                                                                                                                                                                                |
| <b>SPERM QUALITY</b>                                                                                                                                                                                                                  |                            |                                                              |                                   |                                                |                                                                                                                                                                                                                  |
| <b>Dhooge et al. (2006).</b><br>Serum dioxin-like activity is associated with reproductive parameters in young men from the general Flemish population.<br><br>Flemish Environment and Health Study FLEHS (Belgium, Antwerp and Peer) | Cross-sectional<br><br>n/a | 100                                                          | CALUX determined BEQ levels       | BEQs (pg/L serum) (n=100)                      | Pronounced drop in semen volume of 16% (p=0.03); sperm concentration rose by 25.2% (p=0.07).                                                                                                                     |
|                                                                                                                                                                                                                                       |                            | Mean (SD) age at outcome assessment: 32.6 (5.8)              | Blood                             | Median: 62.3<br>Mean: 90.0                     | No relationship with total sperm count or sperm morphology.                                                                                                                                                      |
|                                                                                                                                                                                                                                       |                            | 1999                                                         | Lipid adjusted                    | BEQs (pg/g fat):<br>Median: 11.9<br>Mean: 14.6 | Inhibin B, FSH, LH, testosterone, free fraction of testosterone, oestradiol, SHBG: 2-fold increase in BEQ >16 pg/L associated with 7.1% and 6.7% decrease in total and free testosterone (p=0.04), respectively. |
| <b>Toft et al. (2007).</b> Semen quality in relation to xenohormone and dioxin-like serum activity among Inuits and three European populations.                                                                                       | Cross-sectional<br><br>n/a | 319 (Poland 83, Greenland 54, Ukraine 86, Sweden 96)         | CALUX determined BEQ levels       | Median (P5–P95) (n = 319) (pg BEQ/g fat)       | Risk of bias tier: 1<br><b>Semen parameters</b> (concentration, motility and morphology)                                                                                                                         |
|                                                                                                                                                                                                                                       |                            | Mean (P5-P95) age at outcome assessment: Warsaw: 30 (26–38)  | Blood serum<br><br>Lipid adjusted | Warsaw:<br>320 (130–360)                       | No significant association between BEQs and sperm motility or sperm morphology<br><br>Significant geographic differences for                                                                                     |

| Reference<br>Trial or study name<br>(geography)                                                                                                                                                                                | Study type<br>Duration  | Participants in the study                                                                                                                                 | Compounds                                                                                   | Levels of exposure                                                                                                                                                                                                                                                                      | Parameters measured and Measures of effect                                                                                                                                                                                                                                                                                                                                                                                               |
|--------------------------------------------------------------------------------------------------------------------------------------------------------------------------------------------------------------------------------|-------------------------|-----------------------------------------------------------------------------------------------------------------------------------------------------------|---------------------------------------------------------------------------------------------|-----------------------------------------------------------------------------------------------------------------------------------------------------------------------------------------------------------------------------------------------------------------------------------------|------------------------------------------------------------------------------------------------------------------------------------------------------------------------------------------------------------------------------------------------------------------------------------------------------------------------------------------------------------------------------------------------------------------------------------------|
|                                                                                                                                                                                                                                |                         | Age at outcome assessment (years)<br>Year of tissue sampling                                                                                              | Measurement of Exposure                                                                     |                                                                                                                                                                                                                                                                                         | Risk of bias tier                                                                                                                                                                                                                                                                                                                                                                                                                        |
| Warsaw, Poland<br>Greenland<br>Kharkiv, Ukraine<br>Sweden (fishermen)                                                                                                                                                          |                         | Greenland: 30 (20–40)<br>Kharkiv:28 (20–38)<br>Sweden:46 (32–62)<br><br>2002–2004                                                                         |                                                                                             | Greenland:<br>190 (100–600)<br><br>Kharkiv:<br>330 (180–630)<br><br>Sweden:<br>460 (220–920)                                                                                                                                                                                            | associations between BEQ and sperm concentration (positive association to sperm concentration in Warsaw), combined analysis was therefore not conducted for this outcome.<br><br>Risk of bias tier: 2                                                                                                                                                                                                                                    |
| <b>Cok et al. (2008).</b><br>Concentrations of polychlorinated dibenzo- <i>p</i> -dioxins (PCDDs), polychlorinated dibenzofurans (PCDFs), and dioxin-like PCBs in adipose tissue of infertile men.<br><br>n/a (Turkey, Ankara) | Case control<br><br>n/a | 45 (fertile men 23, infertile men 22)<br><br>Mean (SD) age at outcome assessment:<br>Fertile men: 35.1 (6.5)<br>Infertile men:33.8 (6.5)<br><br>2003–2005 | 17 PCDD/Fs, 4 DL-PCBs (PCB-77, -81, -126, -169)<br><br>Adipose tissue<br><br>Lipid adjusted | Mean (SD) (pg/g fat)<br><br><u>Fertile men</u> (n = 23):<br>PCDD/Fs WHO <sub>2005</sub> -TEQ: 7.2 (3.9)<br>Total WHO <sub>2005</sub> -TEQ: 12.5 (6.6)<br><br><u>Infertile men</u> (n = 22):<br>PCDD/Fs WHO <sub>2005</sub> -TEQ: 7.0 (3.1)<br>Total WHO <sub>2005</sub> -TEQ: 9.4 (4.0) | <b>Semen parameters</b> (concentration, motility and morphology)<br><br>No statistical significant difference for individual congeners except TCDD (fertile=0.6±0.5 pg/g fat; infertile=1.4±1.1 pg/g fat; p=0.0029) and OCDD (fertile=2.1±1.3 pg/g fat; infertile=4.3±3.6 pg/g fat; p=0.01).<br><br>Statistically significant, but in opposite direction, for non- <i>ortho</i> and mono- <i>ortho</i> PCBs.<br><br>Risk of bias tier: 2 |
| <b>Mocarelli et al. (2008).</b><br>Dioxin exposure, from infancy through puberty, produces endocrine disruption and affects human semen quality.<br><br>Seveso Cohort (Italy, Seveso)                                          | Cohort<br><br>22 years  | 135 exposed, 184 comparison<br><br>Mean (SD) age at outcome assessment:<br><br><u>Exposed Group 22–31 years</u> (n=71): 28.1 (2.5) (1–9 years old at      | TCDD<br><br>Blood<br><br>Lipid adjusted                                                     | Median (pg/g fat) per age group<br><br>Exposed (n = 135)      Comparison (n = 184)<br>22–31 32–39      22–31 32–39<br><br><u>At explosion in 1976:</u><br>210 164      ≤15      ≤15                                                                                                     | <b>Sperm concentration</b><br><br>The associations depend on age at explosion: (Exposed vs Controls)<br><br><u>Childhood (1–9 years old at explosion):</u><br>Negative associations<br>- Sperm concentration: 53.6 vs 72.5 million/mL<br>- Progressive motility: 33.2 vs 40.8%                                                                                                                                                           |

| Reference<br>Trial or study name<br>(geography)                                                                          | Study type<br>Duration | Participants in the study                                                                                                                                                                                                                                                                                                                                                                               | Compounds                                | Levels of exposure                                                                                         | Parameters measured and Measures of effect                                                                                                                                                                                                                                                                                                                                                                                                                                                                                                                                                                                                                                                                                                                                                                                                                                                                                                                                                                                    |
|--------------------------------------------------------------------------------------------------------------------------|------------------------|---------------------------------------------------------------------------------------------------------------------------------------------------------------------------------------------------------------------------------------------------------------------------------------------------------------------------------------------------------------------------------------------------------|------------------------------------------|------------------------------------------------------------------------------------------------------------|-------------------------------------------------------------------------------------------------------------------------------------------------------------------------------------------------------------------------------------------------------------------------------------------------------------------------------------------------------------------------------------------------------------------------------------------------------------------------------------------------------------------------------------------------------------------------------------------------------------------------------------------------------------------------------------------------------------------------------------------------------------------------------------------------------------------------------------------------------------------------------------------------------------------------------------------------------------------------------------------------------------------------------|
|                                                                                                                          |                        | Age at outcome assessment (years)<br>Year of tissue sampling                                                                                                                                                                                                                                                                                                                                            | Measurement of Exposure                  |                                                                                                            | Risk of bias tier                                                                                                                                                                                                                                                                                                                                                                                                                                                                                                                                                                                                                                                                                                                                                                                                                                                                                                                                                                                                             |
|                                                                                                                          |                        | explosion)<br><u>Group 32–39 years</u><br>(n = 44): 35.0 (2.2)<br>(10–17 years old at explosion)<br><u>Group 40–47 years</u><br>(n = 20): 43.3 (2.2)<br>(18–26 years old at explosion)<br><br><u>Comparison</u><br><u>Group 22–31 years</u><br>(n = 82): 27.3 (2.9)<br><u>Group 32–39 years</u><br>(n = 71): 35.5 (2.3)<br><u>Group 40–47 years</u><br>(n = 31): 43.1 (2.3)<br><br>1976–1977, 1997–1998 |                                          | In 1998:<br>3.04 4.67 <6.0 <6.0<br><br>Age group 40–47<br>Exposed (n = 20): 123                            | - Motile sperm count: 44.2 vs 77.5 x 10 <sup>6</sup><br><br><u>Puberty (10–17 years old at explosion):</u><br>Positive associations.<br>- Total sperm count: 272 vs 191.9 x 10 <sup>6</sup><br>- Motile sperm count: 105 vs 64.9 x 10 <sup>6</sup><br><br><u>Adults (18–26 years old at explosion):</u><br>No associations.<br><br><b>Testosterone, Inhibin B, FSH, estradiol:</b><br><br><u>Childhood (1–9 years old at explosion):</u><br>- Increase in FSH<br>(3.58 vs 2.98 IU/L; p=0.055)<br>- Reduced estradiol<br>(76.2 vs 95.9 pmol/L; p=0.001)<br><br><u>Puberty (10–17 years old at explosion):</u><br>- Increased FSH (4.1 vs 3.2 UI/L; p=0.038)<br>- Reduced estradiol (74.4 vs 92.9 pmol/L;<br>p < 0.001)<br><br><u>Adults (18–26 years old at explosion):</u><br>No effects observed<br><br>Risk of bias tier: 1<br><b>Sperm morphology</b><br><br>Breast-fed sons whose exposed mothers had median serum TCDD concentration ≥19 pg/g fat at conception had lower sperm concentration (36.3 vs. 86.3 million/mL; |
| <b>Mocarelli et al. (2011).</b><br>Perinatal exposure to low doses of dioxin can permanently impair human semen quality. | Cohort<br>18–26 years  | 39 exposed group (21 breast-fed, 18 formula fed), 58 comparison group (36 breast-fed, 22 formula fed)                                                                                                                                                                                                                                                                                                   | TCDD<br>Maternal blood<br>Lipid adjusted | Median (pg/g fat)<br><br><i>At exposure (1976):</i><br><br><u>Mothers who breast-fed</u><br>(n = 20): 46.8 |                                                                                                                                                                                                                                                                                                                                                                                                                                                                                                                                                                                                                                                                                                                                                                                                                                                                                                                                                                                                                               |

| Reference<br>Trial or study name<br>(geography)                                                                                                                                    | Study type<br>Duration                         | Participants in the study                                                                                                                                                                                         | Compounds                                                                                                | Levels of exposure                                                                                                                                                                                                                                                                                                                                                                                                                                                                                                                                                      | Parameters measured and Measures of effect                                                                                                                                                                                                                                                                                                                                                                                                                                                                                                                                                                                                                                                                                    |
|------------------------------------------------------------------------------------------------------------------------------------------------------------------------------------|------------------------------------------------|-------------------------------------------------------------------------------------------------------------------------------------------------------------------------------------------------------------------|----------------------------------------------------------------------------------------------------------|-------------------------------------------------------------------------------------------------------------------------------------------------------------------------------------------------------------------------------------------------------------------------------------------------------------------------------------------------------------------------------------------------------------------------------------------------------------------------------------------------------------------------------------------------------------------------|-------------------------------------------------------------------------------------------------------------------------------------------------------------------------------------------------------------------------------------------------------------------------------------------------------------------------------------------------------------------------------------------------------------------------------------------------------------------------------------------------------------------------------------------------------------------------------------------------------------------------------------------------------------------------------------------------------------------------------|
|                                                                                                                                                                                    |                                                | Age at outcome assessment (years)<br>Year of tissue sampling                                                                                                                                                      | Measurement of Exposure                                                                                  |                                                                                                                                                                                                                                                                                                                                                                                                                                                                                                                                                                         | Risk of bias tier                                                                                                                                                                                                                                                                                                                                                                                                                                                                                                                                                                                                                                                                                                             |
| Seveso Cohort (Italy, Seveso)                                                                                                                                                      |                                                | <p>Mean (SD) age at outcome assessment:<br/>Exposed: 22.5 (2.2)<br/>Comparison: 24.6 (2.0)</p> <p>Mean (SD) age of mothers at conception:<br/>Exposed: 28.2 (5.4)<br/>Comparison: 28.1 (4.8)</p> <p>1976–1977</p> |                                                                                                          | <p><u>Mothers who formula-fed</u><br/>(n = 17): 55.7<br/><u>Comparison</u>: 10 (assumed)</p> <p><i>At conception calculated for 20–42 years of age using a TCDD half-life of 4 years:</i></p> <p><u>Mothers who breast-fed</u><br/>(n = 20): 19<br/><u>Mothers who formula-fed</u><br/>(n = 17): 27.9</p> <p><i>At the time of the study:</i></p> <p><u>Exposed group</u><br/>Breast fed group<br/>(n = 21): 2.4<br/>Formula fed group<br/>(n = 18): 1.1<br/><u>Comparison group</u><br/>Breast fed group<br/>(n = 36): 1.8<br/>Formula fed group<br/>(n = 22): 1.0</p> | <p>p=0.002), total count (116.9 vs. 231.1; p=0.02), progressive motility (35.8 vs. 44.2%; p=0.03), and total motile count (38.7 vs. 98 million; p=0.01) than did the 36 breast-fed comparisons.</p> <p>Formula-fed exposed and formula-fed/breast-fed comparisons (maternal dioxin background 10 pg/g fat at conception) had no sperm-related differences.</p> <p><b>FSH, Inhibin B:</b> FSH higher in breast-fed exposed group than in breast-fed comparisons (4.1 vs. 2.63 IU/L; p = 0.03) or formula-fed exposed (4.1 vs. 2.6 IU/L; p = 0.04). Inhibin B lower (breast-fed exposed group, 70.2; breast-fed comparisons, 101.8 pg/mL, p = 0.01; formula-fed exposed, 99.9 pg/mL, p = 0.02).</p> <p>Risk of bias tier: 2</p> |
| <p><b>Den Hond et al. (2015).</b><br/>Human exposure to endocrine disrupting chemicals and fertility: a case-control study in male subfertility patients.</p> <p>n/a (Belgium)</p> | <p>Cross-sectional case control</p> <p>n/a</p> | <p>120 (40 cases, 80 controls)</p> <p>Age (P25; P75) at outcome assessment:<br/>Controls:<br/>34.1 (30.0; 38.5)<br/>Cases:</p>                                                                                    | <p>CALUX determined BEQ levels (PCDD/Fs-BEQs and DL-PCBs BEQs)</p> <p>Said to be lipid adjusted, but</p> | <p>Geometric mean (P25; P75) (pg BEQ/g)</p> <p><u>Controls (n = 40):</u><br/>DL-PCB-BEQs:<br/>0.069 (0.050; 0.080)<br/>PCDD/F-BEQs:<br/>0.19 (0.16; 0.21)</p>                                                                                                                                                                                                                                                                                                                                                                                                           | <p><b>Semen parameters</b> (concentration, motility and morphology)</p> <p>No statistically significant differences in BEQs between cases and controls neither before nor after adjusting for confounders.</p> <p>Risk of bias tier: 2</p>                                                                                                                                                                                                                                                                                                                                                                                                                                                                                    |



| Reference                                                                                                                                                                       | Study type | Participants in the study                                                                   | Compounds                                                                                                            | Levels of exposure                                                                                                                                                                                                                                                | Parameters measured and Measures of effect                                                                                                                                                                                                                                                                                                                                                                                                                                                                                                                                                                                                                                                                                                                                                                                                                                   |
|---------------------------------------------------------------------------------------------------------------------------------------------------------------------------------|------------|---------------------------------------------------------------------------------------------|----------------------------------------------------------------------------------------------------------------------|-------------------------------------------------------------------------------------------------------------------------------------------------------------------------------------------------------------------------------------------------------------------|------------------------------------------------------------------------------------------------------------------------------------------------------------------------------------------------------------------------------------------------------------------------------------------------------------------------------------------------------------------------------------------------------------------------------------------------------------------------------------------------------------------------------------------------------------------------------------------------------------------------------------------------------------------------------------------------------------------------------------------------------------------------------------------------------------------------------------------------------------------------------|
| Trial or study name (geography)                                                                                                                                                 | Duration   | Age at outcome assessment (years)<br>Year of tissue sampling                                | Measurement of Exposure                                                                                              |                                                                                                                                                                                                                                                                   | Risk of bias tier                                                                                                                                                                                                                                                                                                                                                                                                                                                                                                                                                                                                                                                                                                                                                                                                                                                            |
|                                                                                                                                                                                 |            | 31.6 (29.0; 35.0)<br>Time of tissue sampling: not reported                                  | reported as pg BEQ/g                                                                                                 | Cases (n = 80):<br>DL-PCB-BEQs:<br>0.063 (0.050; 0.070)<br>PCDD/F-BEQs:<br>0.23 (0.16; 0.31)                                                                                                                                                                      |                                                                                                                                                                                                                                                                                                                                                                                                                                                                                                                                                                                                                                                                                                                                                                                                                                                                              |
| <b>Mínguez-Alarcón et al. (2017).</b> A Longitudinal Study of Peripubertal Serum Organochlorine Concentrations and Semen Parameters in Young Men: The Russian Children's Study. | Cohort     | 133<br>Enrolled at age 8–9 years<br>Age at outcome assessment (in 2015): 18–19<br>2003–2005 | 17 PCDD/Fs, 10 DL-PCBs (-77, -81, -126, -169, -105, -118, -156, -157, -167, -189)<br>Blood (serum)<br>Lipid adjusted | Median (Min, Max) (n = 133) (pg WHO <sub>2005</sub> -TEQ/g fat):<br>Total TEQ:<br>21.9 (1.88, 107)<br>TCDD:<br>2.9 (0.35–12.1)<br>PCDD-TEQ:<br>8.7 (0.95–36.0)<br>PCDF-TEQ:<br>4.8 (0.55–50.6)<br>DL-PCB-TEQ (sum of PCB-77, -81, -126, -169):<br>6.9 (0.52–67.2) | <b>Sperm motility and sperm concentration</b><br><br>Higher serum TCDD and PCDD-TEQs associated with significantly lower semen parameters 10 years later.<br><br>In adjusted models, on average, men in the highest quartile of serum TCDD had 40% lower sperm concentration (p, trend=0.005), 29% lower total sperm count (p, trend=0.05) and 30% lower total motile sperm count (p, trend=0.05), compared to those in the lowest quartile.<br><br>Men in the highest quartile of serum PCDD TEQs had a decrease of 39% in sperm concentration (p, trend=0.02), 36% in total sperm count (p, trend=0.04), and 40% in total motile sperm count (p, trend=0.05), compared with the lowest quartile of PCDD TEQs.<br><br>No significant associations between semen parameters and summed concentrations of PCDDs, PCDFs, co-PCBs or with PCDF-TEQs, DL-PCB-TEQs or total TEQs. |

| Reference<br>Trial or study name<br>(geography)                                                                                                                                                                      | Study type<br>Duration  | Participants in the study                                                                                                                                                                                                          | Compounds                                                    | Levels of exposure                                                                                                                                                                                                                                                                                    | Parameters measured and Measures of effect                                                                                                                                                                                                                                                                                                                                                                                                                                        |
|----------------------------------------------------------------------------------------------------------------------------------------------------------------------------------------------------------------------|-------------------------|------------------------------------------------------------------------------------------------------------------------------------------------------------------------------------------------------------------------------------|--------------------------------------------------------------|-------------------------------------------------------------------------------------------------------------------------------------------------------------------------------------------------------------------------------------------------------------------------------------------------------|-----------------------------------------------------------------------------------------------------------------------------------------------------------------------------------------------------------------------------------------------------------------------------------------------------------------------------------------------------------------------------------------------------------------------------------------------------------------------------------|
|                                                                                                                                                                                                                      |                         | Age at outcome assessment (years)<br>Year of tissue sampling                                                                                                                                                                       | Measurement of Exposure                                      |                                                                                                                                                                                                                                                                                                       | Risk of bias tier                                                                                                                                                                                                                                                                                                                                                                                                                                                                 |
| * Additional information was obtained from the authors. See documentation submitted to EFSA and <b>Section 3.1.4.3.1</b> of the opinion.                                                                             |                         |                                                                                                                                                                                                                                    |                                                              |                                                                                                                                                                                                                                                                                                       |                                                                                                                                                                                                                                                                                                                                                                                                                                                                                   |
| Risk of bias tier: 1                                                                                                                                                                                                 |                         |                                                                                                                                                                                                                                    |                                                              |                                                                                                                                                                                                                                                                                                       |                                                                                                                                                                                                                                                                                                                                                                                                                                                                                   |
| <b>CHRYPTORCHIDISM</b>                                                                                                                                                                                               |                         |                                                                                                                                                                                                                                    |                                                              |                                                                                                                                                                                                                                                                                                       |                                                                                                                                                                                                                                                                                                                                                                                                                                                                                   |
| <b>Virtanen et al. (2012).</b><br>Associations between congenital cryptorchidism in newborn boys and levels of dioxins and PCBs in placenta.<br><br>Danish-Finnish Joint Prospective Cohort Study (Denmark, Finland) | Case control<br><br>n/a | 280 (95 cases (56+39), 185 controls (56+129))<br><br>Age at outcome assessment: at birth and at 3 months.<br><br>1997–2001                                                                                                         | 17 PCDD/Fs, 12 DL-PCBs<br><br>Placenta<br><br>Lipid adjusted | Median (range) (pg WHO <sub>1998</sub> -TEQ/g fat)<br><br><u>Finland:</u><br>Cases (n = 56): 11.66 (4.78–25.73)<br>Controls (n = 56): 10.58 (3.54–37.04)<br>Adjusted p=0.64<br><br><u>Denmark:</u><br>Cases (n = 39): 13.94 (8.89–31.01)<br>Controls (n = 129): 13.00 (4.93–35.61)<br>Adjusted p=0.60 | <b>Congenital cryptorchidism</b><br><br>No association found between exposure to current background levels of PCDD/Fs and DL-PCBs (evaluated as placenta levels) and congenital cryptorchidism.<br><br>FSH, LH, SHBG: No statistically significant associations between PCDD/Fs and DL-PCB levels and reproductive hormones levels, except for DL-PCB-TEQ levels associated positively with infant LH levels (b=0.47, p=0.01) in the Finnish samples.<br><br>Risk of bias tier: 1 |
|                                                                                                                                                                                                                      |                         | <b>Koskenniemi et al. (2015).</b><br>Association between levels of persistent organic pollutants in adipose tissue and cryptorchidism in early childhood: a case-control study.<br><br>n/a (Finland (Turku), Denmark (Copenhagen)) | Cross sectional<br><br>n/a                                   | 82 (44 cases, 38 controls)<br><br>Mean (SD) age at operation:<br>Cases: 2.3 (1.0)<br>Controls: 2.9 (2.2)<br><br>Controls not matched to cases in any way                                                                                                                                              | 17 PCDD/Fs, 12 DL-PCBs<br><br>Adipose tissue<br><br>Not lipid adjusted                                                                                                                                                                                                                                                                                                                                                                                                            |

| Reference<br>Trial or study name<br>(geography)                                                                                                                                                       | Study type<br>Duration     | Participants in the study                                                  | Compounds                                                                | Levels of exposure                                                                                                                                                                                                                      | Parameters measured and Measures of effect                                                                                                                                                                                                                                                                                                                                           |
|-------------------------------------------------------------------------------------------------------------------------------------------------------------------------------------------------------|----------------------------|----------------------------------------------------------------------------|--------------------------------------------------------------------------|-----------------------------------------------------------------------------------------------------------------------------------------------------------------------------------------------------------------------------------------|--------------------------------------------------------------------------------------------------------------------------------------------------------------------------------------------------------------------------------------------------------------------------------------------------------------------------------------------------------------------------------------|
|                                                                                                                                                                                                       |                            | Age at outcome assessment (years)<br>Year of tissue sampling               | Measurement of Exposure                                                  |                                                                                                                                                                                                                                         | Risk of bias tier                                                                                                                                                                                                                                                                                                                                                                    |
|                                                                                                                                                                                                       |                            | 2002–2006                                                                  |                                                                          | Cases (n = 14):<br>18.5 (3.41–56.0)<br>Control (n = 9):<br>13.0 (2.64–42.0)<br>p 0.73<br><br>Finland and Denmark:<br>Cases (n = 44):<br>9.78 (3.24–56.0)<br>Control (n = 38):<br>7.50 (2.64–64.1)<br>p 0.55                             |                                                                                                                                                                                                                                                                                                                                                                                      |
| <b>PUBERTAL DEVELOPMENT</b>                                                                                                                                                                           |                            |                                                                            |                                                                          |                                                                                                                                                                                                                                         |                                                                                                                                                                                                                                                                                                                                                                                      |
| <b>Den Hond et al. (2002).</b><br>Sexual maturation in relation to polychlorinated aromatic hydrocarbons: Sharpe and Skakkebaek’s hypothesis revisited.<br><br>Environment and Health Study (Belgium) | Cross-sectional<br><br>n/a | 80 boys<br><br>Mean (SD) age at outcome assessment: 17.3 (0.8)<br><br>1999 | CALUX-determined BEQ levels<br><br>Blood serum<br><br>Fat was determined | Geometric mean (95% CI) (ng BEQ/L)<br><br><u>Peer (rural) (n = 40):</u><br>0.15 (0.12–0.20)<br><br><u>Wilrijk (urban) (n = 21):</u><br>0.15 (0.10–0.22)<br><br><u>Hoboken (urban) (n= 19):</u><br>0.20 (0.13–0.29)<br><br>p-value: 0.51 | <b>Staged sexual maturation, testicular volume</b><br><br>No change in genital development or pubic hair growth with increase in serum BEQs was observed.<br><br>Testicular volume did not correlate with serum BEQs.<br><br>Serum concentrations of testosterone, estradiol, SHBG, Inhibin B, LH, FSH: No correlation of BEQs and serum hormones levels<br><br>Risk of bias tier: 2 |
| <b>Leijs et al. (2008).</b> Delayed initiation of breast development in girls with higher prenatal dioxin                                                                                             | Cohort<br><br>14–19 years  | 14 boys<br><br>Median age at outcome assessment: 14.3                      | 17 PCDD/Fs, 3 DL-PCBs (-77, -126, -169)                                  | Median (n = 14)<br><br><u>Human milk PCDD/F-TEQs:</u><br>28.6 pg I-TEQ/g fat                                                                                                                                                            | <b>Genital development, testicular volume, age at first ejaculation, growth axillar hair stage</b>                                                                                                                                                                                                                                                                                   |

| Reference<br>Trial or study name<br>(geography)                                                                                                 | Study type<br>Duration               | Participants in the study                                                | Compounds                                                                                                                     | Levels of exposure                                                                                                                                                                                                                                                        | Parameters measured and Measures of effect                                                                                                                                                                                                                                                                                                                                                                                                                                                                                                                                                                                                                             |
|-------------------------------------------------------------------------------------------------------------------------------------------------|--------------------------------------|--------------------------------------------------------------------------|-------------------------------------------------------------------------------------------------------------------------------|---------------------------------------------------------------------------------------------------------------------------------------------------------------------------------------------------------------------------------------------------------------------------|------------------------------------------------------------------------------------------------------------------------------------------------------------------------------------------------------------------------------------------------------------------------------------------------------------------------------------------------------------------------------------------------------------------------------------------------------------------------------------------------------------------------------------------------------------------------------------------------------------------------------------------------------------------------|
|                                                                                                                                                 |                                      | Age at outcome assessment (years)<br>Year of tissue sampling             | Measurement of Exposure                                                                                                       |                                                                                                                                                                                                                                                                           | Risk of bias tier                                                                                                                                                                                                                                                                                                                                                                                                                                                                                                                                                                                                                                                      |
| exposure; a longitudinal cohort study<br><br>Amsterdam/Zaandam Cohort (The Netherlands)                                                         |                                      | 1987–1991                                                                | Human milk (perinatal exposure), blood (serum) (current)<br><br>Lipid adjusted                                                | Current PCDD/F-TEQs:<br>2.3 pg WHO <sub>2005</sub> -TEQ/g fat<br><br>Current DL-PCB-TEQs:<br>1.5 pg WHO <sub>2005</sub> -TEQ/g fat                                                                                                                                        | Negative trend with age at first ejaculation (n = 6 for total TEQ).<br><br>For pubic hair, axillary hair, genital stage, testicular volume: no significant relation.<br><br>Risk of bias tier: 2<br><br><i>Comments:</i> Too low n.                                                                                                                                                                                                                                                                                                                                                                                                                                    |
| <b>Korrick et al. (2011).</b> Dioxin Exposure and Age of Pubertal Onset among Russian Boys.<br><br>Russian Children's Study (Russia, Chapaevsk) | Cohort<br><br>3 years study duration | 489 boys<br><br>Age (range) at outcome assessment: 8–12<br><br>2003–2005 | 17 PCDD/Fs,<br>10 DL-PCBs (-77, -81, -126, -169, -105, -118, -156, -157, -167, -189)<br><br>Blood serum<br><br>Lipid adjusted | Mean (SD)<br>(pg WHO <sub>2005</sub> -TEQ/g fat)<br><br>Total TEQ (n = 473):<br>27.7 (22.0)<br><br>Q1 (< 14)<br>Q2 (14 to < 20)<br>Q3 (20 to < 30)<br>Q4 (30 to 175)<br><br>TCDD (n = 473):<br>3.1 (3.1)<br><br>Q1 (< 1.3)<br>Q2 (1.3–2.7)<br>Q3 (2.8–3.9)<br>Q4 (4.0–45) | <b>Pubertal onset (growth and pubertal assessments):</b> stage 2 or higher for genitalia (Tanner scale G2+) or testicular volume > 3 mL<br><br>Higher TCDD and PCDD TEQs associated with later pubertal onset by testicular volume. For TCDD, the HR (95% CI) TV > 3 ml was:<br>Q2: 0.97 (0.70-1.34)<br>Q3 0.89 (0.63-1.24)<br>Q4 0.69 (0.48-0.98), p for trend 0.04.<br>For PCDD-TEQ the HRs were<br>Q2 0.87 (0.62-1.21),<br>Q3 0.61 (0.43-0.85)<br>Q4 (0.68 (0.49-0.95) p for trend 0.006.<br><br>Similar associations not observed for G2+.<br><br>Risk of bias tier: 1<br><br><i>Comments:</i> Co-exposure with other contaminants in the cohort not adjusted for. |
| <b>Humblet et al. (2011).</b> Dioxin and Polychlorinated                                                                                        | Cohort                               | 444 boys                                                                 | 17 PCDD/Fs,<br>10 DL-PCBs (-77, -                                                                                             | Maternal Total TEQ<br>(pg WHO <sub>2005</sub> -TEQ/g fat):                                                                                                                                                                                                                | <b>Pubertal onset:</b> genitalia stage 2 or higher, testicular volume >3 mL, pubic hair stage 2                                                                                                                                                                                                                                                                                                                                                                                                                                                                                                                                                                        |

| Reference<br>Trial or study name<br>(geography)                                                                                                                                                                                                         | Study type<br>Duration  | Participants in the study                                         | Compounds                                                                                                 | Levels of exposure                                                                                                                                                    | Parameters measured and Measures of effect                                                                                                                                                                                                                                                                                                                                                                                                                                                                                                                                    |
|---------------------------------------------------------------------------------------------------------------------------------------------------------------------------------------------------------------------------------------------------------|-------------------------|-------------------------------------------------------------------|-----------------------------------------------------------------------------------------------------------|-----------------------------------------------------------------------------------------------------------------------------------------------------------------------|-------------------------------------------------------------------------------------------------------------------------------------------------------------------------------------------------------------------------------------------------------------------------------------------------------------------------------------------------------------------------------------------------------------------------------------------------------------------------------------------------------------------------------------------------------------------------------|
|                                                                                                                                                                                                                                                         |                         | Age at outcome assessment (years)<br>Year of tissue sampling      | Measurement of Exposure                                                                                   |                                                                                                                                                                       | Risk of bias tier                                                                                                                                                                                                                                                                                                                                                                                                                                                                                                                                                             |
| Biphenyl Concentrations in Mother's Serum and the Timing of Pubertal Onset in Sons.<br><br>Russian Children's Study (Russia, Chapaevsk)                                                                                                                 | 3 years                 | Mean age (SD) at outcome assessment: 8.4 (0.5)<br><br>2003–2005   | 81, -126, -169, -105, -118, -156, -157, -167, -189) and NDL-PCBs<br><br>Blood serum<br><br>Lipid adjusted | 25<br><br>Detailed information has been published previously (Burns et al., 2009).<br><br>min: 4.6<br>P10: 12<br>P25: 17<br>P50: 25<br>P75: 36<br>P90: 51<br>max: 173 | or higher<br><br>Primary analysis: Maternal serum Total TEQ concentrations were not associated with son's pubertal onset.<br><br>Secondary analysis: Dose-related delay in pubertal onset (only for G2 or higher) seen among boys who were breast-fed for 6 months or more.<br><br>Risk of bias tier: 1<br><br><i>Comments:</i> Potential for exposure misclassification because of interval (8–9 years) between pregnancy and collection of blood samples for analysis. Could bias results towards null. Co-exposure with other contaminants in the cohort not adjusted for. |
| <b>Su et al. (2012).</b> The effect of <i>in utero</i> exposure to dioxins and polychlorinated biphenyls on reproductive development in eight year-old children.<br><br>Part of a prospective study of dioxins/PCBs for the general population (Taiwan) | Cohort<br><br>2001–2009 | 23 boys<br><br>Mean age at outcome assessment: 8<br><br>2000–2001 | 17 PCDD/Fs, 12 DL-PCBs<br><br>Placenta<br><br>Lipid adjusted                                              | Median (range) (pg WHO <sub>1998</sub> -TEQ/g fat)<br><br>Maternal total (n = 56): 14.8 (6.8, 29.1)<br><br>Maternal boys (n = 23): 15.2 (7, 29.1)                     | <b>Indicators of reproductive development (Tanner stage)</b><br><br>No sex characteristics of boys were affected by the level of exposure to PCDD/Fs and PCBs <i>in utero</i> (data not shown).<br><br>Testosterone, estradiol, LH, FSH levels: generally unaffected by PCDD/Fs. Estradiol concentrations significantly lower in children exposed to higher levels than median of total-TEQ compared to children exposed to levels lesser than median (P=0.003).                                                                                                              |

| Reference<br>Trial or study name<br>(geography)                                                                                                                                                                                                                                                | Study type<br>Duration  | Participants in the study                                      | Compounds                                                                                                            | Levels of exposure                                                                                                                                                                                   | Parameters measured and Measures of effect                                                                                                                                                                                                                                                                                                                                                                                                                                                                                                                                       |
|------------------------------------------------------------------------------------------------------------------------------------------------------------------------------------------------------------------------------------------------------------------------------------------------|-------------------------|----------------------------------------------------------------|----------------------------------------------------------------------------------------------------------------------|------------------------------------------------------------------------------------------------------------------------------------------------------------------------------------------------------|----------------------------------------------------------------------------------------------------------------------------------------------------------------------------------------------------------------------------------------------------------------------------------------------------------------------------------------------------------------------------------------------------------------------------------------------------------------------------------------------------------------------------------------------------------------------------------|
|                                                                                                                                                                                                                                                                                                |                         | Age at outcome assessment (years)<br>Year of tissue sampling   | Measurement of Exposure                                                                                              |                                                                                                                                                                                                      | Risk of bias tier                                                                                                                                                                                                                                                                                                                                                                                                                                                                                                                                                                |
|                                                                                                                                                                                                                                                                                                |                         |                                                                |                                                                                                                      |                                                                                                                                                                                                      | Analyses stratified by sex not reported.<br>Risk of bias tier: 2                                                                                                                                                                                                                                                                                                                                                                                                                                                                                                                 |
| <b>Croes et al. (2014).</b><br>Monitoring chlorinated persistent organic pollutants in adolescents in Flanders (Belgium): Concentrations, trends and dose-effect relationships (FLEHS II).<br>Flemish Environment and Health Study FLEHS II (Belgium, Flanders, Hotspots: Genk-Zuid and Menen) | Cross-sectional<br>n/a  | 324<br>Age at outcome assessment: 13.6–17.0<br>2008–2011       | CALUX determined BEQ levels<br>Blood serum<br>Lipid adjusted                                                         | Geometric mean (95% CI) referents, both sexes (n = 210) (pg BEQ/g fat):<br>PCDD/F-BEQs: 108 (101, 114)<br>DL-PCB-BEQs: 32.1 (30.1, 34.2)<br>Concentrations were significantly lower in hotspot areas | No significant association between genital or pubic hair development and BEQ levels.<br>Testosterone, LH, SHBG, total 17 $\beta$ -estradiol: No significant relationship.<br>Risk of bias tier: 2<br><i>Comments:</i> Reported only significant associations, no details on male sexual development provided. Incomplete report on outcome assessment in boys.                                                                                                                                                                                                                   |
| <b>Burns et al. (2016).</b><br>Associations of Peripubertal Serum Dioxin and Polychlorinated Biphenyl Concentrations with Pubertal Timing among Russian Boys.<br>Russian Children's Study (Russia, Chapaevsk)                                                                                  | Cohort study<br>9 years | 473<br>Age at outcome assessment: 8–9 until 17–18<br>2003–2005 | 17 PCDD/Fs, 10 DL-PCBs (-77, -81, -126, -169, -105, -118, -156, -157, -167, -189)<br>Blood (serum)<br>Lipid adjusted | Levels at age 8–9 years (n = 473) (pg WHO <sub>2005</sub> -TEQ/g fat)<br>Q1: 4.0–14.5<br>Q2: 14.6–21.0<br>Q3: 21.1–33.2<br>Q4: 33.3–174.7                                                            | <b>Pubertal onset</b> (genitalia stage 2 or higher, testicular volume >3mL, pubic hair stage 2 or higher), <b>Sexual maturity</b> (genitalia stage 5 or higher, testicular volume >10mL, pubic hair stage 5 or higher)<br>Pubertal onset (months, 95% CI) by testicular volume<br>Q2 4.0 (-1.9-9.8), Q3 7.5 (0.6, 14.4), Q4 11.6 (3.8-19.4), p for trend 0.003.<br>Pubertal onset by genitalia stage $\geq$ 2<br>Q2 8.1 (1.5-14.7), Q3 10.1 (2.3-17.9)<br>Q4 (10.1 (1.4-18.8), p for trend 0.03.<br>Sexual maturity by testicular volume<br>Q2 6.0 (1.6-10.5), Q3 8.8 (3.7-14.0) |

| Reference                       | Study type | Participants in the study         | Compounds               | Levels of exposure | Parameters measured and Measures of effect                                                                                                                                                                                                                                                                                                                                                                    |
|---------------------------------|------------|-----------------------------------|-------------------------|--------------------|---------------------------------------------------------------------------------------------------------------------------------------------------------------------------------------------------------------------------------------------------------------------------------------------------------------------------------------------------------------------------------------------------------------|
| Trial or study name (geography) | Duration   | Age at outcome assessment (years) | Measurement of Exposure |                    | Risk of bias tier                                                                                                                                                                                                                                                                                                                                                                                             |
|                                 |            | Year of tissue sampling           |                         |                    |                                                                                                                                                                                                                                                                                                                                                                                                               |
|                                 |            |                                   |                         |                    | <p>Q4 11.6 (5.7-17.6), p for trend &lt;0.001.</p> <p>Sexual maturity by genitalia stage 5<br/>           Q2 4.4 (-0.5-9.3), Q3 7.5 (1.9-13.2)<br/>           Q4 9.7 (3.1-16.2), p for trend 0.004.</p> <p>Pubic hair staging was not associated with serum total TEQ or NDL-PCBs.</p> <p>Risk of bias tier: 1</p> <p><i>Comments:</i> Co-exposure with other contaminants in the cohort not adjusted for.</p> |

FSH: follicle stimulating hormone; LH: luteinizing hormone; SHBG: sex hormone binding globulin; n/a: not applicable.



### A.8.2. Studies on female reproductive effects

**Table 66.** Epidemiological studies on the association between exposure to PCDD/Fs and DL-PCBs and **female reproductive effects**. Details about the risk of bias appraisal can be found in **Annex A.9.2**.

| Reference<br>Trial or study name<br>(geography)                                                                                                                              | Study type<br>Duration | Participants in the study                                                                                                                                                            | Compounds                           | Levels of exposure                                                                                | Parameters measured and Measures of effect                                                                                                                                                                                                                                                                                                                                                                                                 |
|------------------------------------------------------------------------------------------------------------------------------------------------------------------------------|------------------------|--------------------------------------------------------------------------------------------------------------------------------------------------------------------------------------|-------------------------------------|---------------------------------------------------------------------------------------------------|--------------------------------------------------------------------------------------------------------------------------------------------------------------------------------------------------------------------------------------------------------------------------------------------------------------------------------------------------------------------------------------------------------------------------------------------|
|                                                                                                                                                                              |                        | Age at outcome assessment (years)<br>Year of tissue sampling                                                                                                                         | Measurement of exposure             |                                                                                                   | Risk of bias tier                                                                                                                                                                                                                                                                                                                                                                                                                          |
| <b>ENDOMETRIOSIS</b>                                                                                                                                                         |                        |                                                                                                                                                                                      |                                     |                                                                                                   |                                                                                                                                                                                                                                                                                                                                                                                                                                            |
| <b>Pauwels et al. (2001).</b> The risk of endometriosis and exposure to dioxins and polychlorinated biphenyls: a case-control study of infertile women.<br><br>n/a (Belgium) | Case-control           | 69 (42 cases, 27 controls)                                                                                                                                                           | CALUX determined BEQ levels         | Median (range) (pg BEQs/g fat)                                                                    | <b>Endometriosis determined by laparoscopy in infertile women</b><br><br>No significant association between exposure and endometriosis.<br><br>Risk of bias tier: 2                                                                                                                                                                                                                                                                        |
|                                                                                                                                                                              |                        | Median (range) age at outcome assessment:<br>Cases: 31 (25–42)<br>Controls: 32 (24–41)<br><br>1996–1998                                                                              | Blood (serum)<br><br>Lipid adjusted | Cases (n=34 above LOD): 29 (0–160)<br><br>Controls (n=24 above LOD): 27 (0–135)                   |                                                                                                                                                                                                                                                                                                                                                                                                                                            |
| <b>Eskenazi et al. (2002a).</b> Serum dioxin concentrations and endometriosis: A cohort study in Seveso, Italy.<br><br>Seveso Women's Health Study (SWHS) (Italy, Seveso)    | Cohort<br><br>20 years | 601                                                                                                                                                                                  | TCDD                                | Median (range) (pg/g fat) (n = 601):                                                              | <b>Endometriosis</b><br><br>Relative risk ratios (RRRs) for women with serum TCDD levels of 20.1–100 pg/g fat and >100 pg/g fat were 1.2 (90% CI=0.3–4.5) and 2.1 (90% CI=0.5–8.0), respectively, relative to women with TCDD levels ≤20 pg/g fat.<br><br>Tests for trend using the above exposure categories and continuous log TCDD were non-significant.<br><br>Risk of bias tier: 2<br><br><i>Comments:</i> Small number of women with |
|                                                                                                                                                                              |                        | ≤30 years of age at exposure<br><br>Age at outcome assessment:<br>20–29 years: 20%<br>30–39 years: 39%<br>≥40 years: 41%<br><br>1976–1977 (n=559)<br>1978–1981 (n=25)<br>1996 (n=17) | Blood (serum)<br><br>Lipid adjusted | 54.9 (2.5–17,300)<br><br>Median by group:<br>Cases: 77.3<br>Non-diseased: 61.0<br>Uncertain: 49.0 |                                                                                                                                                                                                                                                                                                                                                                                                                                            |

| Reference<br>Trial or study name<br>(geography)                                                                                                                                                                                                                                                                                  | Study type<br>Duration     | Participants in the study                                                                                             | Compounds                                                                       | Levels of exposure                                                                                                                                                                                                                                                                                                                                        | Parameters measured and Measures of effect                                                                                                                                                                                                                                                                                                  |
|----------------------------------------------------------------------------------------------------------------------------------------------------------------------------------------------------------------------------------------------------------------------------------------------------------------------------------|----------------------------|-----------------------------------------------------------------------------------------------------------------------|---------------------------------------------------------------------------------|-----------------------------------------------------------------------------------------------------------------------------------------------------------------------------------------------------------------------------------------------------------------------------------------------------------------------------------------------------------|---------------------------------------------------------------------------------------------------------------------------------------------------------------------------------------------------------------------------------------------------------------------------------------------------------------------------------------------|
|                                                                                                                                                                                                                                                                                                                                  |                            | Age at outcome assessment (years)<br>Year of tissue sampling                                                          | Measurement of exposure                                                         |                                                                                                                                                                                                                                                                                                                                                           | Risk of bias tier                                                                                                                                                                                                                                                                                                                           |
|                                                                                                                                                                                                                                                                                                                                  |                            |                                                                                                                       |                                                                                 |                                                                                                                                                                                                                                                                                                                                                           | endometriosis. Inability to perform laparoscopy on entire cohort may have reduced power of study.                                                                                                                                                                                                                                           |
| <b>Fierens et al. (2003).</b> Dioxin / polychlorinated biphenyl body burden, diabetes and endometriosis: findings in a population-based study in Belgium.<br><br>n/a (Belgium; Cockerill (iron and steel plant), Mont-Saint-Guibert (waste dumping site), Pont-de-Loup (MWSI), Thumaide (MWSI), Rural areas in Southern Belgium) | Cross-sectional<br><br>n/a | 142 (10 cases, 132 controls)<br><br>Mean age at outcome assessment:<br>Cases: 49.0<br>Controls: 51.2<br><br>2000–2001 | 17 PCDD/Fs, 4 DL-PCBs (-77, -81, -126, -169)<br><br>Blood<br><br>Lipid adjusted | Mean levels (pg WHO <sub>1998</sub> -TEQ/g fat) (n = 10 cases, n = 132 controls)<br><br><u>Sum of PCDD/F-TEQs:</u><br>Cases: 26.2 (18.2–37.7)<br>Controls: 25.6 (24.3–28.9)<br><br><u>Sum of DL-PCB-TEQs:</u><br>Cases: 7.97 (5.05–12.6)<br>Controls: 7.45 (6.69–8.30)<br><br><u>Total TEQs:</u><br>Cases: 34.6 (23.7–50.4)<br>Controls: 34.5 (31.7–37.6) | <b>Endometriosis</b><br><br>No difference in exposure between endometriosis cases and controls.<br><br>Risk of bias tier: 2<br><br><i>Comments:</i> Small number of cases. Controls were not matched to cases before collection of data. Other potential confounders than age, BMI, serum lipids, e.g. smoking, not considered in analysis. |
| <b>De Felip et al. (2004).</b> Dioxin-like compounds and endometriosis: a study on Italian and Belgian women of reproductive age.<br><br>n/a (Italy (Rome), Belgium (Brussels))                                                                                                                                                  | Case control<br><br>n/a    | 40 (23 cases, 17 controls)<br><br>Age at outcome assessment:<br>18–40<br><br>2000–2001                                | 17 PCDD/Fs, 12 DL-PCBs<br><br>Blood<br><br>Lipid adjusted                       | Range (pooled concentrations per country) (pg WHO <sub>1998</sub> -TEQ/g fat)<br><br>Italy (n = 10 controls and 12 cases): 17.7–18.5<br><br>Belgium (n = 7 controls and 11 cases): 34.4–48.6                                                                                                                                                              | <b>Endometriosis</b><br><br>No difference case/control. Higher concentrations in Belgium than in Italy.<br><br>Risk of bias tier: 2<br><br><i>Comments:</i> Small study size (pilot study). Pooled samples (in total 6 pools).                                                                                                              |
| <b>Heilier et al. (2005).</b> Increased dioxin-like compounds in the serum of women with peritoneal endometriosis and deep                                                                                                                                                                                                       | Case control<br><br>n/a    | 71 (25 PEND, 25 DEN, 21 controls)<br><br>Mean (SD) age at outcome assessment:                                         | 17 PCDD/Fs, 12 DL-PCB<br><br>Blood (serum)                                      | Non-standardised mean (pg WHO <sub>1998</sub> -TEQ/g fat)<br><br><u>PCDD/F-TEQs</u><br>Controls (n = 21):                                                                                                                                                                                                                                                 | <b>Endometriosis (peritoneal endometriosis, PEND) and deep endometriotic (Deep endometriotic nodules, DEN)</b>                                                                                                                                                                                                                              |

| Reference<br>Trial or study name<br>(geography)                                                                                                                           | Study type<br>Duration        | Participants in the study                                                                                                                           | Compounds                                                                                                                    | Levels of exposure                                                                                                                                                                                                                      | Parameters measured and Measures of effect                                                                                                                                                                                                                                                                                                                                                                                                                                                                                                                                                                           |
|---------------------------------------------------------------------------------------------------------------------------------------------------------------------------|-------------------------------|-----------------------------------------------------------------------------------------------------------------------------------------------------|------------------------------------------------------------------------------------------------------------------------------|-----------------------------------------------------------------------------------------------------------------------------------------------------------------------------------------------------------------------------------------|----------------------------------------------------------------------------------------------------------------------------------------------------------------------------------------------------------------------------------------------------------------------------------------------------------------------------------------------------------------------------------------------------------------------------------------------------------------------------------------------------------------------------------------------------------------------------------------------------------------------|
|                                                                                                                                                                           |                               | Age at outcome assessment (years)<br>Year of tissue sampling                                                                                        | Measurement of exposure                                                                                                      |                                                                                                                                                                                                                                         | Risk of bias tier                                                                                                                                                                                                                                                                                                                                                                                                                                                                                                                                                                                                    |
| endometriotic (adenomyotic) nodules.<br>n/a (Belgium)                                                                                                                     |                               | Controls:<br>31.1 (6.0)<br><u>Peritoneal endometriosis (PEND):</u><br>31.8 (6.5)<br><u>Deep endometriosis (DEN):</u><br>30.8 (7.0)<br><br>2001–2003 | Lipid adjusted                                                                                                               | 15.5 (13.1–18.4)<br>PEND (n = 25):<br>20.9 (18.1–24.0)<br>DEN (n = 25):<br>26.0 (21.9–30.8)<br><br><u>DL-PCB-TEQs</u><br>Controls (n = 21):<br>8.5 (6.9–10.5)<br>PEND (n = 25):<br>11.0 (9.1–13.3)<br>DEN (n = 25):<br>12.4 (10.3–14.9) | After adjustment for age/BMI mean TEQ levels were 24.21 (controls), 30.62 (PEND), and 37.60 (DEN) pg TEQ/g fat.<br><br>Logistic regression analysis indicated a significantly increased risk of DEN (OR=3.3, 95% CI 1.4–7.6) for an increment of 10 pg in Total TEQ levels/g fat.<br><br>A marginal significant increased risk also found for PEND (OR=1.9, 95% CI 0.9–3.8) for total TEQ levels and for PCDD/Fs alone (OR=3.2, 95% CI 1.0–9.9).<br><br>Risk of bias tier: 1<br><br><i>Comments:</i> Small study size. Residual confounding possible due to factors not considered. Controls may have endometriosis. |
| <b>Tsukino et al. (2005).</b><br>Associations between serum levels of selected organochlorine compounds and endometriosis in infertile Japanese women.<br><br>n/a (Japan) | Case-control study<br><br>n/a | 139 (58 cases, 81 controls)<br><br>Mean age at outcome assessment:<br>Controls: 32.9<br>Cases: 32.4<br><br>1999-2000                                | 17 PCDD/Fs, 10 DL-PCBs (-77, -81, -126, -169, -105, -118, -156, -157, -167, -189)<br><br>Blood (serum)<br><br>Lipid adjusted | Median (25th, 75th) (pg WHO <sub>1998</sub> -TEQ/g fat)<br><br>Cases (Stage 0-I) (n = 58):<br>22.76 (19.73, 29.14)<br><br>Controls (Stage II-IV) (n = 81):<br>25.07 (20.27, 31.84)                                                      | <b>Endometriosis determined by laparoscopy in infertile women.</b> Stage 0 and 1 was designated controls and stage II-IV identified as cases.<br><br>Serum total PCDDs TEQ was higher in controls than in cases (P=0.02). Total TEQ was not significantly different between cases and controls. Adjusted OR for endometriosis showed a non-significant (P for trend=0.06) decreasing trend with increasing serum total TEQ.<br><br>Risk of bias tier: 1                                                                                                                                                              |

| Reference                                                                                                                                                                   | Study type                | Participants in the study                                                                                               | Compounds                                                      | Levels of exposure                                                                                                                                                                                                                                       | Parameters measured and Measures of effect                                                                                                                                                                                                                                                                                                                                                                                                                                                                                           |
|-----------------------------------------------------------------------------------------------------------------------------------------------------------------------------|---------------------------|-------------------------------------------------------------------------------------------------------------------------|----------------------------------------------------------------|----------------------------------------------------------------------------------------------------------------------------------------------------------------------------------------------------------------------------------------------------------|--------------------------------------------------------------------------------------------------------------------------------------------------------------------------------------------------------------------------------------------------------------------------------------------------------------------------------------------------------------------------------------------------------------------------------------------------------------------------------------------------------------------------------------|
| Trial or study name (geography)                                                                                                                                             | Duration                  | Age at outcome assessment (years)<br>Year of tissue sampling                                                            | Measurement of exposure                                        |                                                                                                                                                                                                                                                          | Risk of bias tier                                                                                                                                                                                                                                                                                                                                                                                                                                                                                                                    |
| <b>Endometriosis</b>                                                                                                                                                        |                           |                                                                                                                         |                                                                |                                                                                                                                                                                                                                                          |                                                                                                                                                                                                                                                                                                                                                                                                                                                                                                                                      |
| <b>Niskar et al. (2009).</b> Serum dioxins, polychlorinated biphenyls, and endometriosis: A case-control study in Atlanta.<br>n/a (USA, Atlanta)                            | Case control study<br>n/a | 124 (60 cases, 64 controls)<br>Mean age at outcome assessment: not reported<br>1998–1999                                | 17 PCDD/Fs,<br>12 DL-PCBs<br>Blood<br>Lipid adjusted           | Concentrations were low in cases and controls<br>Examples (pg/g fat):<br>Cases (n = 53) Controls (n = 51)<br>PCB-126:<br>22.0 19.5<br>PCB-118:<br>10,100 9,300<br>TCDD:<br>1.84 2.02<br>1,2,3,7,8-PeCDD:<br>2.33 2.58<br>1,2,3,6,7,8-HxCDD:<br>29.3 24.6 | Regression models of continuous and dichotomised exposure variables and endometriosis stage adjusted for different sets of modifying variables indicated no difference between cases and controls.<br>Analyses including only histology confirmed controls (50% of controls) showed the same result.<br>Risk of bias tier: 2<br><i>Comments:</i> Small study size. Participants were seeking reproductive assistance, not representative for the general population. Low detection rate, e.g. TCDD detected in 7 out of 124 samples. |
| <b>Porpora et al. (2009).</b> Endometriosis and organochlorinated environmental pollutants: a case-control study on Italian women of reproductive age<br>n/a (Rome , Italy) | Case-control study<br>n/a | 158 (80 cases, 78 controls)<br>Mean (SD) age at outcome assessment: Cases: 31.6 (6.0) Controls: 29.5 (6.1)<br>2002–2005 | CALUX determined BEQ levels<br>Blood (serum)<br>Lipid adjusted | pg BEQs/g fat<br>Cases (n = 80): 18.6 (14.5–23.9)<br>Controls (n = 78): 20.9 (17.3–25.2)<br>p value 0.47                                                                                                                                                 | <b>Endometriosis determined by laparoscopy and histology.</b><br>No increased risk of endometriosis associated with serum concentrations of BEQs (covariate adjusted). No difference in stratified analyses based on endometriosis type and localisation. However, increased OR of endometriosis found for increasing serum levels of ND-L-PCBs.<br>Risk of bias tier: 1                                                                                                                                                             |
| <b>Simsa et al. (2010).</b>                                                                                                                                                 | Case                      | 201 (96 cases, 105                                                                                                      | CALUX determined                                               | Median (range)                                                                                                                                                                                                                                           | <b>Stage of endometriosis</b>                                                                                                                                                                                                                                                                                                                                                                                                                                                                                                        |

| Reference<br>Trial or study name<br>(geography)                                                                                         | Study type<br>Duration | Participants in the study                                                                                                            | Compounds                                                                             | Levels of exposure                                                                                                                                                                                                                    | Parameters measured and Measures of effect                                                                                                                                                                                                                                                                                                                                                                                                                                                                                                                                                                                                           |
|-----------------------------------------------------------------------------------------------------------------------------------------|------------------------|--------------------------------------------------------------------------------------------------------------------------------------|---------------------------------------------------------------------------------------|---------------------------------------------------------------------------------------------------------------------------------------------------------------------------------------------------------------------------------------|------------------------------------------------------------------------------------------------------------------------------------------------------------------------------------------------------------------------------------------------------------------------------------------------------------------------------------------------------------------------------------------------------------------------------------------------------------------------------------------------------------------------------------------------------------------------------------------------------------------------------------------------------|
|                                                                                                                                         |                        | Age at outcome assessment (years)<br>Year of tissue sampling                                                                         | Measurement of exposure                                                               |                                                                                                                                                                                                                                       | Risk of bias tier                                                                                                                                                                                                                                                                                                                                                                                                                                                                                                                                                                                                                                    |
| Increased exposure to dioxin-like compounds is associated with endometriosis in a case-control study in women.<br>n/a (Belgium, Leuven) | control study<br>n/a   | controls)                                                                                                                            | BEQ levels                                                                            | (pg BEQs g/fat)                                                                                                                                                                                                                       | Patients with low concentrations (<25th centile) and group with high concentrations (>75th centile) of DL-compounds, age-adjusted OR to have endometriosis was 2.44 (95% CI=1.04–5.70; p=0.04)<br><br>OR was 3.0 (95% CI=1.1–8.6; p=0.03) when only cases with moderate and severe endometriosis were considered.<br><br>Risk of bias tier: 2<br><br><i>Comments:</i> Did not consider important confounders including BMI, smoking history, age at menarche, reproductive history, disease duration, infertility duration, infertility diagnosis. Participants were seeking reproductive assistance, not representative for the general population. |
|                                                                                                                                         |                        | Mean age at outcome assessment (years): 31.5 (similar in cases and controls)<br>2001–2005                                            | Blood plasma collected before laparoscopic operation<br>Lipid adjusted                | Controls (n = 105): 19.4 (5.4–61.2)<br>Endometriosis (all stages) (n = 96): 21.2 (7.7–54.9)<br>Total (n = 200): 20.3 (5.4–61.2)                                                                                                       |                                                                                                                                                                                                                                                                                                                                                                                                                                                                                                                                                                                                                                                      |
| <b>Cai et al. (2011).</b> Dioxins in ascites and serum of women with endometriosis: a pilot study.<br>n/a (Japan, Tokai)                | Case control<br>n/a    | 17 (10 cases, 7 controls)<br>Age at outcome assessment:<br>Endometriosis group: 33.5 (3.6)<br>Control group: 36.4 (5.9)<br>2004–2007 | 17 PCDD/Fs, 12 DL-PCBs<br>Blood (serum), peritoneal fluid (ascites)<br>Lipid adjusted | (pg WHO <sub>1998</sub> -TEQ/g fat)<br><br><u>Mean (SD) in blood</u><br>Cases (n=10)    Controls (n=7)<br>PCDD/Fs: 16.1 (5.6)    14.3 (3.1)<br>DL-PCBs: 7.2 (1.8)    7.5 (3.9)<br><br><u>Mean (SD) in peritoneal fluid (ascites):</u> | <b>Endometriosis</b><br>Higher concentrations of PCDFs and DL-PCBs observed in peritoneal fluid than in serum, whereas the reverse was shown for PCDDs.<br><br>Higher levels of PCDD/F-TEQs in peritoneal fluid significantly associated with increased risk of endometriosis (OR=2.5; 95% CI 1.17–5.34; p=0.035).<br><br>No association with blood PCDD/Fs.                                                                                                                                                                                                                                                                                         |

| Reference<br>Trial or study name<br>(geography)                                                                                                                                                                                        | Study type<br>Duration  | Participants in the study                                                                                                                                           | Compounds                                                                                                    | Levels of exposure                                                                                                                                                                                                                   |                                       | Parameters measured and Measures of effect                                                                                                                                                                                                                                                                                                                                                                                                    |
|----------------------------------------------------------------------------------------------------------------------------------------------------------------------------------------------------------------------------------------|-------------------------|---------------------------------------------------------------------------------------------------------------------------------------------------------------------|--------------------------------------------------------------------------------------------------------------|--------------------------------------------------------------------------------------------------------------------------------------------------------------------------------------------------------------------------------------|---------------------------------------|-----------------------------------------------------------------------------------------------------------------------------------------------------------------------------------------------------------------------------------------------------------------------------------------------------------------------------------------------------------------------------------------------------------------------------------------------|
|                                                                                                                                                                                                                                        |                         | Age at outcome assessment (years)<br>Year of tissue sampling                                                                                                        | Measurement of exposure                                                                                      | Cases                                                                                                                                                                                                                                | Controls                              | Risk of bias tier                                                                                                                                                                                                                                                                                                                                                                                                                             |
|                                                                                                                                                                                                                                        |                         |                                                                                                                                                                     |                                                                                                              | Cases<br>PCDD/Fs:<br>12.2 (10.5)<br>DL-PCBs:<br>18.7 (5.3)                                                                                                                                                                           | Controls<br>10.8 (12.3)<br>19.3 (9.7) | Risk of bias tier: 2<br><br><i>Comments:</i> Small sample size; authors state study had too low power to detect any association.                                                                                                                                                                                                                                                                                                              |
| <b>Martínez-Zamora et al. (2015).</b> Increased levels of dioxin-like substances in adipose tissue in patients with deep infiltrating endometriosis<br><br>n/a (Spain, Catalonia)                                                      | Case control<br><br>n/a | 60 (30 DIE, 30 controls)<br><br>Age at outcome assessment:<br>DIE cases group: 32.5 (3.8)<br>Control group: 31.1 (4.9)<br><br>Time of tissue sampling: not reported | 17 PCDD/Fs, 12 DL-PCBs<br><br>Adipose tissue (collected during the surgical procedure)<br><br>Lipid adjusted | Median (IQR) WHO <sub>2005</sub> -TEQ for each individual congeners analysed, but Total TEQ not reported<br><br>TCDD, Median (IQR) (pg/g fat)<br><br>Cases (n = 30):<br>0.70 (0.53, 0.76)<br>Controls (n = 30):<br>0.40 (0.32, 0.64) |                                       | <b>Deep infiltrating endometriosis (DIE)</b><br><br>OR (95% CI)<br>TCDD: 1.41 (1.12-2.10)<br>1,2,3,7,8-PeCDD: 1.82 (1.36-7.14)<br><br>For TCDD, 1,2,3,7,8-PeCDD, 2,3,4,7,8-PeCDF, PCB-126, PCB-114, PCB-156, PCB-189 significantly higher in patients with DIE compared to control group (p<0.05).<br><br>Risk of bias tier: 1<br><br><i>Comments:</i> Small study size, exploratory. Surgery-based sampling frame may induce selection bias. |
| <b>Ploteau et al. (2017).</b> Associations between internal exposure levels of persistent organic pollutants in adipose tissue and deep infiltrating endometriosis with or without concurrent ovarian endometrioma<br><br>n/a (France) | Case control            | 99 (44 controls, 24 cases of DIE only, 25 cases of DIE+OvE)<br>Age (range) at outcome assessment: 18–45.<br>2013–2015                                               | 17 PCDD/Fs, 12 DL-PCBs<br>Adipose tissue<br>Lipid adjusted                                                   | Median (P25, P75) total TEQ (pg WHO <sub>2005</sub> -TEQ/g fat)<br><br>Controls (n = 44):<br>9.88 (7.06, 12.82)<br><br>Cases with DIE alone (n = 24):<br>8.94 (8.94, 14.24)<br>Cases with DIE+OvE (n = 25):                          |                                       | <b>Deep infiltrating endometriosis (DIE), and DIE occurring alone or together with ovarian endometrioma (OvE)</b><br>Adjusted OR (95% CI) per 1 sd increase in Total TEQ:<br><br>DIE vs controls (n=99, unclear from the study): 1.82 (1.02–3.45)<br>DIE+OvE vs controls (n=69): 2.86 (1.29–7.38)                                                                                                                                             |

| Reference<br>Trial or study name<br>(geography)                                                                                                         | Study type<br>Duration           | Participants in the study                                        | Compounds                                                                | Levels of exposure                                                                                                                                               | Parameters measured and Measures of effect                                                                                                                                                                                                                                                                                                                                                                                                 |
|---------------------------------------------------------------------------------------------------------------------------------------------------------|----------------------------------|------------------------------------------------------------------|--------------------------------------------------------------------------|------------------------------------------------------------------------------------------------------------------------------------------------------------------|--------------------------------------------------------------------------------------------------------------------------------------------------------------------------------------------------------------------------------------------------------------------------------------------------------------------------------------------------------------------------------------------------------------------------------------------|
|                                                                                                                                                         |                                  | Age at outcome assessment (years)<br>Year of tissue sampling     | Measurement of exposure                                                  |                                                                                                                                                                  | Risk of bias tier                                                                                                                                                                                                                                                                                                                                                                                                                          |
|                                                                                                                                                         |                                  |                                                                  |                                                                          | 14.36 (14.36, 19.23)                                                                                                                                             | DIE only vs controls (n=68): 1.39 (0.72–2.82)<br>DIE+OvE vs DIE only (n=49): 2.49 (1.03–7.24)<br><br>The study investigated associations between exposure to multiple individual organochlorine compounds, and after adjustment for multiple comparison test the p was >0.05 and no more significant. Only the OR for OCDF for DIE vs controls and DIE+OvE vs controls remained significant after such adjustment.<br>Risk of bias tier: 1 |
| <b>PUBERTAL DEVELOPMENT</b>                                                                                                                             |                                  |                                                                  |                                                                          |                                                                                                                                                                  |                                                                                                                                                                                                                                                                                                                                                                                                                                            |
| <b>Warner et al. (2004).</b><br>Serum dioxin concentrations and age at menarche.                                                                        | Cohort<br><br>20 years follow-up | 282<br><br>Mean (SD) age at follow-up in 1996–98: 27.3 (3.8)     | TCDD<br><br>Blood (serum)<br><br>Lipid adjusted                          | Median (n = 282) (pg/g fat)<br><br><11 years 183.5<br>11 years 109.7<br>12 years 122.0<br>13 years 207.5<br>14 years 135.0<br>>14 years 136.0<br><br>Total 140.3 | <b>Age at menarche</b><br><br>No associations between TCDD (analysed as continuous as well as categorical variable) and age at menarche.<br><br>Risk of bias tier: 1                                                                                                                                                                                                                                                                       |
| <b>Den Hond et al. (2002).</b><br>Sexual maturation in relation to polychlorinated aromatic hydrocarbons: Sharpe and Skakkebaek's hypothesis revisited. | Cross-sectional<br><br>n/a       | 120 girls<br><br>Mean (SD) age at outcome assessment: 17.4 (0.8) | CALUX determined BEQ levels<br><br>Blood serum<br><br>Fat was determined | Geometric mean (95% CI) (ng BEQ/L)<br><br>Peer (rural) (n = 60): 0.11 (0.09–0.13)<br><br>Wilrijk (urban) (n = 21): 0.17 (0.13–0.22)                              | <b>Female sexual development</b><br><br>A doubling of the serum dioxin concentrations increased the odds of not having reached the adult stage of breast development: OR=2.3 (p=0.02)<br>Pubic hair growth: OR=1.0 (p=0.97)<br><br>Serum concentrations of testosterone,                                                                                                                                                                   |
| Seveso Women's Health Study (SWHS) (Italy, Seveso)                                                                                                      |                                  | 1976–1977 (n = 257)<br>1978–1981 (n = 23)<br>1996 (n = 2)        |                                                                          |                                                                                                                                                                  |                                                                                                                                                                                                                                                                                                                                                                                                                                            |
| Environment and Health Study (Belgium)                                                                                                                  |                                  | 1999                                                             |                                                                          |                                                                                                                                                                  |                                                                                                                                                                                                                                                                                                                                                                                                                                            |



| Reference<br>Trial or study name<br>(geography)                                                                                                                                                                                                  | Study type<br>Duration     | Participants in the study                                              |                                                                      | Compounds<br>Measurement of exposure                                                                                                                          | Levels of exposure                                                 | Parameters measured and Measures of effect                                                                                                                                                                                                                                                                                                                                                                                                                                                                                                            |
|--------------------------------------------------------------------------------------------------------------------------------------------------------------------------------------------------------------------------------------------------|----------------------------|------------------------------------------------------------------------|----------------------------------------------------------------------|---------------------------------------------------------------------------------------------------------------------------------------------------------------|--------------------------------------------------------------------|-------------------------------------------------------------------------------------------------------------------------------------------------------------------------------------------------------------------------------------------------------------------------------------------------------------------------------------------------------------------------------------------------------------------------------------------------------------------------------------------------------------------------------------------------------|
|                                                                                                                                                                                                                                                  |                            | Age at outcome assessment (years)                                      | Year of tissue sampling                                              |                                                                                                                                                               |                                                                    | Risk of bias tier                                                                                                                                                                                                                                                                                                                                                                                                                                                                                                                                     |
|                                                                                                                                                                                                                                                  |                            |                                                                        |                                                                      |                                                                                                                                                               | Hoboken (urban) (n= 39):<br>0.21 (0.17–0.26)<br><br>p-value <0.001 | estradiol, SHBG, Inhibin B, LH, FSH: No correlation of CALUX-BEQs and serum hormones levels.<br><br>Risk of bias tier: 2                                                                                                                                                                                                                                                                                                                                                                                                                              |
| <b>Su et al. (2012).</b> The effect of in utero exposure to dioxins and polychlorinated biphenyls on reproductive development in eight year-old children.<br><br>Part of a prospective study of dioxins/PCBs for the general population (Taiwan) | Cohort<br><br>2001–2009    | 33<br><br>F<br><br>Mean age at outcome assessment: 8<br><br>2000–2001  | 17 PCDD/Fs,<br>12 DL-PCBs<br><br>Placenta<br><br>Lipid adjusted      | Median (range)<br>(pg WHO <sub>1998</sub> -TEQ/g fat)<br><br>Maternal total (n = 56):<br>14.8 (6.8, 29.1)<br><br>Maternal Girls (n = 33):<br>14.7 (6.8, 25.1) |                                                                    | <b>Indicators of reproductive development (Tanner stage)</b><br><br>Fundus and uterus lengths were not different in girls exposed to low vs. high maternal total TEQ.<br><br>Hormone levels (testosterone, estradiol, LH, FSH): Hormone levels were generally unaffected by PCDD/Fs. Estradiol concentrations significantly lower in children exposed to higher levels than median of PCDD/F+PCB-TEQ compared to children exposed to levels lesser than median (P=0.003).<br><br>Analyses stratified by sex not reported.<br><br>Risk of bias tier: 2 |
| <b>Croes et al. (2014).</b> Monitoring chlorinated persistent organic pollutants in adolescents in Flanders (Belgium): Concentrations, trends and dose-effect relationships (FLEHS II).<br><br>Flemish Environment and                           | Cross-sectional<br><br>n/a | 282 girls<br><br>Age at outcome assessment: 13.6–17.0<br><br>2008–2011 | CALUX determined BEQ levels<br><br>Blood serum<br><br>Lipid adjusted | Geometric mean (pg BEQ/g fat) referents, both sexes:<br><br>PCDD/F-BEQs:<br>108 (101, 114)<br><br>DL-PCB-BEQs:<br>32.1 (30.1, 34.2)                           |                                                                    | <b>Female sexual development</b><br><br>DL-PCB-BEQs negatively correlated with breast development in girls (p=0.04, OR=0.56 after Ln transformation).<br><br>Testosterone, LH, SHBG, total 17β-estradiol: No significant relationship.                                                                                                                                                                                                                                                                                                                |

| Reference<br>Trial or study name<br>(geography)                                                                                                         | Study type<br>Duration | Participants in the study                                                                                                                                                                       |                                                                  | Compounds                                                                                                                                                                                               |                                                                                                                                                                                                                                                                                                                                                                                                                                                                                                                      | Parameters measured and Measures of effect |
|---------------------------------------------------------------------------------------------------------------------------------------------------------|------------------------|-------------------------------------------------------------------------------------------------------------------------------------------------------------------------------------------------|------------------------------------------------------------------|---------------------------------------------------------------------------------------------------------------------------------------------------------------------------------------------------------|----------------------------------------------------------------------------------------------------------------------------------------------------------------------------------------------------------------------------------------------------------------------------------------------------------------------------------------------------------------------------------------------------------------------------------------------------------------------------------------------------------------------|--------------------------------------------|
|                                                                                                                                                         |                        | Age at outcome assessment (years)                                                                                                                                                               | Year of tissue sampling                                          | Measurement of exposure                                                                                                                                                                                 | Levels of exposure                                                                                                                                                                                                                                                                                                                                                                                                                                                                                                   | Risk of bias tier                          |
| Health Study FLEHS II (Belgium, Hotspots: Genk-Zuid and Menen)                                                                                          |                        |                                                                                                                                                                                                 |                                                                  |                                                                                                                                                                                                         |                                                                                                                                                                                                                                                                                                                                                                                                                                                                                                                      | Risk of bias tier: 2                       |
| <b>OTHER EFFECTS IN FEMALE REPRODUCTION</b>                                                                                                             |                        |                                                                                                                                                                                                 |                                                                  |                                                                                                                                                                                                         |                                                                                                                                                                                                                                                                                                                                                                                                                                                                                                                      |                                            |
| <b>Den Hond et al. (2002).</b><br>Sexual maturation in relation to polychlorinated aromatic hydrocarbons: Sharpe and Skakkebaek's hypothesis revisited. | Cross-sectional<br>n/a | 120 girls<br>Mean (SD) age at outcome assessment:<br>Girls: 17.4 (0.8)                                                                                                                          | CALUX determined BEQ levels<br>Blood serum<br>Fat was determined | Geometric mean (95% CI) (ng BEQ/L)<br>Peer (rural) (n = 60): 0.11 (0.09–0.13)<br>Wilrijk (urban) (n = 21): 0.17 (0.13–0.22)<br>Hoboken (urban) (n = 39): 0.21 (0.17–0.26)<br><br><i>p</i> -value <0.001 | <b>Menstrual history</b><br>No associations were reported between exposure and menstrual cycle characteristics.<br><br>Serum concentrations of testosterone, estradiol, SHBG, Inhibin B, LH, FSH: No correlation of CALUX-BEQs and serum hormones levels.<br>Risk of bias tier: 2                                                                                                                                                                                                                                    |                                            |
| Environment and Health Study (Belgium)                                                                                                                  |                        | 1999                                                                                                                                                                                            |                                                                  |                                                                                                                                                                                                         |                                                                                                                                                                                                                                                                                                                                                                                                                                                                                                                      |                                            |
| <b>Eskenazi et al. (2002b).</b><br>Serum dioxin concentrations and menstrual cycle characteristics.                                                     | Cohort<br>20–21 years  | 301<br>Mean (SD, range) age at outcome assessment:<br>Women pre-menarcheal at the time of the explosion (n = 134): 27.1 (3.8, 20–37)<br>Women post-menarcheal at the time of the explosion (n = | TCDD<br>Blood (serum)<br>Lipid adjusted                          | Median (IQR) (n = 301) (pg/g fat)<br>67.5 (30–194)                                                                                                                                                      | <b>Menstrual cycle characteristics (mean length of menstrual cycle, irregular menstrual cycles, mean number of days of menstrual flow, heaviness of menstrual flow)</b><br>Among women who were premenarcheal at the time of the explosion, a 10-fold increase in serum TCDD level was associated with a lengthening of the menstrual cycle by 0.93 days (95% CI 0.01–1.86) and a reduction in the odds of scanty menstrual flow (adjusted OR=0.33, 95% CI 0.10–1.06).<br><br>Among women who were postmenarcheal at |                                            |

| Reference<br>Trial or study name<br>(geography)                                                                                                                                                                                              | Study type<br>Duration                              | Participants in the study                                                                            | Compounds                                                    | Levels of exposure                                                                                                                                                                                                                 | Parameters measured and Measures of effect                                                                                                                                                                                                                                                                                                                                                                                                                                                           |
|----------------------------------------------------------------------------------------------------------------------------------------------------------------------------------------------------------------------------------------------|-----------------------------------------------------|------------------------------------------------------------------------------------------------------|--------------------------------------------------------------|------------------------------------------------------------------------------------------------------------------------------------------------------------------------------------------------------------------------------------|------------------------------------------------------------------------------------------------------------------------------------------------------------------------------------------------------------------------------------------------------------------------------------------------------------------------------------------------------------------------------------------------------------------------------------------------------------------------------------------------------|
|                                                                                                                                                                                                                                              |                                                     | Age at outcome assessment (years)<br>Year of tissue sampling                                         | Measurement of exposure                                      |                                                                                                                                                                                                                                    | Risk of bias tier                                                                                                                                                                                                                                                                                                                                                                                                                                                                                    |
|                                                                                                                                                                                                                                              |                                                     | 167):<br>38.3 (3.9, 31–44)<br><br>1976–1985                                                          |                                                              |                                                                                                                                                                                                                                    | the time of the explosion, TCDD was not associated with menstrual cycle length or scantiness of flow.<br><br>In both menarche groups, TCDD levels associated with decreased odds of having irregular cycles (adjusted OR=0.46, 95% CI 0.23–0.95) but not related to days of flow.<br><br>Risk of bias tier: 1                                                                                                                                                                                        |
| <b>Chao et al. (2007).</b> Placental transfer of polychlorinated dibenzo- <i>p</i> -dioxins, dibenzofurans, and biphenyls in Taiwanese mothers in relation to menstrual cycle characteristics.<br><br>n/a (Taiwan, Central Taiwan, Taichung) | Cross-sectional<br><br>n/a                          | 119 (13 cases, 106 controls)<br><br>Mean (SD) age at outcome assessment: 29.4 (4.5)<br><br>2000–2001 | 17 PCDD/Fs, 12 DL-PCBs<br><br>Placenta<br><br>Lipid adjusted | Median, Mean (SD) (pg WHO-TEQ/g fat) (n = 119)<br><br><u>PCDD/F-TEQs:</u><br>10.2, 10.7 (4.11)<br><br><u>DL-PCB-TEQs:</u><br>2.67, 2.92 (1.60)<br><br><u>Total TEQs:</u><br>12.8, 13.6 (5.07)<br><br>* WHO-TEF scheme not reported | <b>Menstrual cycle</b><br><br>Placental PCDD/F-TEQ level was higher in women (age ≥ 19 years) with irregular menstrual cycle than in those (age < 18 years) with regular menstrual cycle (p = 0.032).<br><br>Placental DL-PCB-TEQ level was higher in women with menstrual cycles longer than 33 days versus less than 33 days (p = 0.006).<br><br>No associations between Total TEQ and duration of menstrual cycle length or duration of menstrual bleeding per cycle.<br><br>Risk of bias tier: 2 |
| <b>Warner et al. (2007).</b> Serum dioxin concentrations and quality of ovarian function in women of Seveso.<br><br>Seveso Women's Health Study                                                                                              | Cohort<br><br>Recruitment 1996–1998<br><br>20 years | 363 women who were 20–40 years of age and nonusers of oral contraceptives<br><br>Menarche before     | TCDD<br><br>Blood (serum)<br><br>Lipid adjusted              | (pg/g fat) (n=163)<br><br>Median (IQR)<br>77.3 (33–214)                                                                                                                                                                            | <b>Ovarian function, progesterone and oestradiol levels</b><br><br>Serum TCDD was not associated with number or size of ovarian follicles.                                                                                                                                                                                                                                                                                                                                                           |

| Reference<br>Trial or study name<br>(geography)                                                                                                                   | Study type<br>Duration        | Participants in the study                                                                                                                                                                                                                                            | Compounds                                       | Levels of exposure                                                                                                                   | Parameters measured and Measures of effect                                                                                                                                                                                                                             |
|-------------------------------------------------------------------------------------------------------------------------------------------------------------------|-------------------------------|----------------------------------------------------------------------------------------------------------------------------------------------------------------------------------------------------------------------------------------------------------------------|-------------------------------------------------|--------------------------------------------------------------------------------------------------------------------------------------|------------------------------------------------------------------------------------------------------------------------------------------------------------------------------------------------------------------------------------------------------------------------|
|                                                                                                                                                                   |                               | Age at outcome assessment (years)<br>Year of tissue sampling                                                                                                                                                                                                         | Measurement of exposure                         |                                                                                                                                      | Risk of bias tier                                                                                                                                                                                                                                                      |
| (SWHS) (Italy, Seveso)                                                                                                                                            | follow-up                     | explosion:<br>Yes: 168 women<br>No: 195 women<br><br>1976–1977 (n = 330)<br>1978–1982 (n = 25)<br>1996–1997 (n = 8)                                                                                                                                                  |                                                 | Range:<br>2.8–17,300                                                                                                                 | Of women in luteal phase, 87 (67%) ovulated. Serum TCDD not associated with ovulation.<br><br>Among those who had ovulated, serum TCDD not associated with serum progesterone or oestradiol.<br><br>Risk of bias tier: 1                                               |
| <b>Eskenazi et al. (2010).</b><br>Serum Dioxin Concentrations and Time to Pregnancy.<br><br>Seveso Women's Health Study (SWHS) (Italy, Seveso)                    | Cohort<br><br>>20 years       | 278 women who delivered a live birth that was not the result of contraceptive failure<br><br>Mean (SD) maternal age at explosion: 17.2 (6.2)<br><br>Mean (SD) maternal age at interview: 37.7 (6.2)<br><br>1976–1977 (n=431)<br>1978–1981 (n=13)<br>1996–1997 (n=19) | TCDD<br><br>Blood (serum)<br><br>Lipid adjusted | Median (IQR) (n = 463) (pg/g fat)<br><br>At time of exposure: 50 (25–117)<br><br>Extrapolated to time of conception: 13.4 (5.3–38.2) | <b>Time to pregnancy</b><br><br>For every 10-fold increase in serum TCDD a 25% increase in time to pregnancy (adjusted fecundability OR=0.75, 95% CI 0.60–0.95) and doubling in odds of infertility (OR=1.9, 95% CI 1.1–3.2) was observed.<br><br>Risk of bias tier: 1 |
| <b>Eskenazi et al. (2007).</b><br>Serum dioxin concentrations and risk of uterine leiomyoma in the Seveso Women's Health Study<br><br>Seveso Women's Health Study | Cohort<br><br>Around 20 years | 956<br><br>Mean (SD) age at outcome assessment (at follow up): 40.4 (11.5)                                                                                                                                                                                           | TCDD<br><br>Blood (serum)<br><br>Lipid adjusted | TCDD categorised in 3 groups (pg/g fat):<br><br>≤20.0 (n = 151)<br>20.1–75.0 (n = 410)<br>>75.0 (n = 395)                            | <b>Fibroids</b><br><br>HR (95% CI) for earlier onset of fibroids was associated with TCDD exposure. The estimated age-adjusted HR associated with a 10-fold increase in serum TCDD was 0.83 (95% CI 0.65-1.07)                                                         |

| Reference<br>Trial or study name<br>(geography)                                    | Study type<br>Duration                    | Participants in the study                                          | Compounds               | Levels of exposure                                                                                                                                                                                                                                                                                                                                                                                                                     | Parameters measured and Measures of effect                                                                                                                                                                                                                                                                                                   |
|------------------------------------------------------------------------------------|-------------------------------------------|--------------------------------------------------------------------|-------------------------|----------------------------------------------------------------------------------------------------------------------------------------------------------------------------------------------------------------------------------------------------------------------------------------------------------------------------------------------------------------------------------------------------------------------------------------|----------------------------------------------------------------------------------------------------------------------------------------------------------------------------------------------------------------------------------------------------------------------------------------------------------------------------------------------|
|                                                                                    |                                           | Age at outcome assessment (years)<br>Year of tissue sampling       | Measurement of exposure |                                                                                                                                                                                                                                                                                                                                                                                                                                        | Risk of bias tier                                                                                                                                                                                                                                                                                                                            |
| (SWHS) (Italy, Seveso)                                                             |                                           | 1976–1977 (n = 872)<br>1978–1981 (n = 56)<br>1996 (n = 28)         |                         |                                                                                                                                                                                                                                                                                                                                                                                                                                        | Compared with that for women with TCDD levels of ≤20 pg/g fat, the age-adjusted HR were 0.58 (95% CI 0.41-0.81) for women with levels of 20.1-75.0 pg/g fat and 0.62 (95% CI 0.44-0.89) for women with levels of >75.0 pg/g fat.<br><br>Risk of bias tier: 1                                                                                 |
| <b>Eskenazi et al. (2005).</b><br>Serum dioxin concentrations and age at menopause | Cohort<br>1–21 years for TCDD levels      | 616<br>Mean (SD) age at outcome assessment (interview): 47.8 (8.1) | TCDD<br>Blood (serum)   | [Menopausal category N (%)], Median (IQR) (n = 616) (pg/g fat)<br><br><u>Premenopause</u> [260 (42.2%)], 43.6 (21–91)<br><u>Natural menopause</u> [169 (27.4%)], 45.8 (28-100)<br><u>Surgical menopause</u> [83 (13.5%)], 43.4 (28–98)<br><u>Impending menopause</u> [13 (2.1%)], 43.8 (24–105)<br><u>Perimenopause</u> [33 (5.4%)], 36.5 (22–85)<br><u>Other</u> [58 (9.4%)], 39.6 (17–85)<br><u>Total</u> [616 (100%)], 43.7 (24-95) | TCDD (pg/g fat) nmp/ntot (%) HR (95% CI)<br><br><i>Continuous</i><br>log <sub>10</sub> TCDD 169/616 (27) 1.02 (0.8–1.3)<br><br><i>Quintiles</i><br>< 20.4 24/123 (20) 1.0 (reference)<br>20.4–34.2 35/123 (28) 1.1 (0.7–1.8)<br>34.3–54.1 41/123 (33) 1.4 (0.9–2.3)<br>54.2–118 37/124 (30) 1.6 (1.0–2.7)<br>> 118 32/123 (26) 1.0 (0.6–1.8) |
| Seveso Women’s Health Study (SWHS) (Italy, Seveso)                                 | 20–22 years for health outcome assessment | 1976–1977 (n = 564)<br>1978–1982 (n = 28)<br>1996–1997 (n = 24)    | Lipid adjusted          |                                                                                                                                                                                                                                                                                                                                                                                                                                        | Risk of bias tier: 2                                                                                                                                                                                                                                                                                                                         |

PEND: peritoneal endometriosis; DEN: deep endometriotic nodules; DIE: deep infiltrating endometriosis; OvE: ovarian endometrioma; FSH: follicle stimulating hormone; LH: luteinizing hormone; SHBG: sex hormone binding globuline; n/a: not applicable.

### A.8.3. Studies on birth outcomes

**Table 67.** Epidemiological studies on the association between exposure to PCDD/Fs and DL-PCBs and **birth outcomes**. Details about the risk of bias appraisal can be found in **Annex A.9.3**.

| Reference<br>Trial or Study name<br>(geography)                                                                                                                          | Study type<br>Duration     | Participants in the study<br>Age at outcome assessment (years)<br>Year of tissue sampling                                                  | Compounds<br>Measurement of exposure                                                                      | Levels of exposure                                                                                                                                                            | Parameters measured and Measures of effect<br>Risk of bias tier                                                                                                                                                                                                                                                                                                                                                                                                                                             |
|--------------------------------------------------------------------------------------------------------------------------------------------------------------------------|----------------------------|--------------------------------------------------------------------------------------------------------------------------------------------|-----------------------------------------------------------------------------------------------------------|-------------------------------------------------------------------------------------------------------------------------------------------------------------------------------|-------------------------------------------------------------------------------------------------------------------------------------------------------------------------------------------------------------------------------------------------------------------------------------------------------------------------------------------------------------------------------------------------------------------------------------------------------------------------------------------------------------|
| <b>SEX RATIO IN OFFSPRING</b>                                                                                                                                            |                            |                                                                                                                                            |                                                                                                           |                                                                                                                                                                               |                                                                                                                                                                                                                                                                                                                                                                                                                                                                                                             |
| <b>Mocarelli et al. (2000).</b><br>Paternal concentrations of dioxin and sex ratio of offspring<br><br>Seveso study (Italy, Seveso)                                      | Cohort<br><br>n/a          | 535 parents, 674 births (346 girls, 328 boys)<br><br>M, F (parents)<br><br>Age of parents at exposure: 3–45.<br><br>1976–1977              | TCDD<br><br>Blood<br><br>Lipid adjusted                                                                   | Median (range) (pg/g fat)<br><br>Fathers (n = 239)<br>96.5 (2.8–26,400)<br><br>Mothers (n = 296)<br>62.75 (6.45–12,500)                                                       | Increased probability of female births (lower sex ratio) with increasing serum TCDD concentrations from fathers ( $p$ for trend=0.008). The sex ratio was lower in fathers that were younger than 19 years at exposure than those above.<br><br>For exposed mothers, the sex ratio was not associated with exposure.<br><br>A lower sex ratio in the Seveso region with highest exposure (zone A) was also observed in the period 1973–1976, i.e. starting before the accident.<br><br>Risk of bias tier: 1 |
| <b>Schnorr et al. (2001).</b><br>Spontaneous abortion, sex ratio, and paternal occupational exposure to 2,3,7,8-tetrachlorodibenzo- <i>p</i> -dioxin.<br><br>NIOSH (USA) | Cross-sectional<br><br>n/a | 440 women (220 referents, 200 workers), 707 referents births, 300 births from workers before exposure, 332 births during or after exposure | TCDD<br><br>Blood (serum)<br>Levels at conception estimated based on levels in 1987<br><br>Lipid adjusted | Paternal median (range) at conception (pg/g fat)<br><br>Referents (n = 79):<br>6 (2–19)<br>Workers:<br>- before exposure: 6 (all pre-exposure births assigned median referent | Sex ratio did not differ by TCDD exposure (0.53 and 0.54 among workers and referents, respectively), and did not change over quartiles of estimated TCDD in father at conception.<br><br>Risk of bias tier: 2<br><br><i>Comments:</i> Uncertainty associated with estimated levels at conception is unknown.                                                                                                                                                                                                |

| Reference                                                                                                                                                        | Study type        | Participants in the study                                                                                                              | Compounds                                                                                                     | Levels of exposure                                                                                                                                                                                    | Parameters measured and Measures of effect                                                                                                                                                                                                                                                                                                                                                                                                                                                                                                                                                            |
|------------------------------------------------------------------------------------------------------------------------------------------------------------------|-------------------|----------------------------------------------------------------------------------------------------------------------------------------|---------------------------------------------------------------------------------------------------------------|-------------------------------------------------------------------------------------------------------------------------------------------------------------------------------------------------------|-------------------------------------------------------------------------------------------------------------------------------------------------------------------------------------------------------------------------------------------------------------------------------------------------------------------------------------------------------------------------------------------------------------------------------------------------------------------------------------------------------------------------------------------------------------------------------------------------------|
| Trial or Study name (geography)                                                                                                                                  | Duration          | Age at outcome assessment (years)                                                                                                      | Measurement of exposure                                                                                       |                                                                                                                                                                                                       | Risk of bias tier                                                                                                                                                                                                                                                                                                                                                                                                                                                                                                                                                                                     |
|                                                                                                                                                                  |                   | Year of tissue sampling                                                                                                                |                                                                                                               |                                                                                                                                                                                                       |                                                                                                                                                                                                                                                                                                                                                                                                                                                                                                                                                                                                       |
|                                                                                                                                                                  |                   | M<br>Age of parents at exposure: Adults<br>1987–1988                                                                                   |                                                                                                               | value of 6)<br>- estimated level at conception during and after exposure:<br>254 (3–16,340)                                                                                                           |                                                                                                                                                                                                                                                                                                                                                                                                                                                                                                                                                                                                       |
| <b>Ryan et al. (2002).</b> Sex ratios of children of Russian pesticide producers exposed to dioxin.<br><br>Russia (Bashkortostan, Ufa)                           | Cohort<br><br>n/a | 198 parents, 227 births (150 boys, 48 girls)<br><br>M, F<br><br>Age of parents at exposure: Adults (no ages reported)<br><br>1992–2001 | TCDD<br>PeCDD<br><br>Whole Blood<br><br>Lipid adjusted                                                        | Mean values blood lipid sampled in 1997–2000 (n = 84) (pg/g fat)<br><br>Bashkortostan subjects:<br>TEQ: 27<br>TCDD: 4.8<br><br>Ufa subjects:<br>TEQ: 47<br>TCDD: 17<br><br>* TEF scheme not reported. | Sex ratio (fraction male) of combined cohort of 227 children from 150 men and 48 women workers was 0.40, significantly lower (z-test=3.21; p<0.001) than those for city of Ufa (0.512).<br><br>Analysis of sex ratio of children according to maternal or paternal exposure, resulted in decreased sex ratio for fathers (0.38, z-test=3.60; p<0.001) and normal sex ratio of 0.51 for the mothers.<br><br>Risk of bias tier: 2<br><br><i>Comments:</i> Blood samples collected many years after exposure in chemical manufacturing and only from a small subset. Individual exposures are not known. |
| <b>’t Mannetje et al. (2017).</b> Sex ratio of the offspring of New Zealand phenoxy herbicide producers exposed to 2,3,7,8-tetrachlorodibenzo- <i>p</i> -dioxin. | Cohort            | 148 parents, 355 births (197 boys, 158 girls)<br><br>M, F<br><br>Age of parents at                                                     | TCDD in 2007–2008 (back-calculated to the time of their offspring's birth and to 1984 when production ceased) | Mean TCDD (pg/g fat)<br><br>9 (corresponding to 49 pg/g in 1984)<br><br>Group of 60 workers                                                                                                           | Overall sex ratio of as cohort of 355 children from 127 men and 21 women was 0.55 (197 boys, 158 girls).<br><br>For current exposure < 4pg/g fat vs ≥ 4 pg/g fat in fathers: OR of male birth 0.46 (95% CI 0.29 to 0.73). With TCDD in quartiles < 2 to ≥ 8                                                                                                                                                                                                                                                                                                                                           |



| Reference                                                                                                                                                                                                                    | Study type                                 | Participants in the study                                                                                                                                         | Compounds                                                                                  | Levels of exposure                                                                                                                                                                                                                                                                                                                                     | Parameters measured and Measures of effect                                                                                                                                                                                                                                                                                                                                                                                                                                                                                           |
|------------------------------------------------------------------------------------------------------------------------------------------------------------------------------------------------------------------------------|--------------------------------------------|-------------------------------------------------------------------------------------------------------------------------------------------------------------------|--------------------------------------------------------------------------------------------|--------------------------------------------------------------------------------------------------------------------------------------------------------------------------------------------------------------------------------------------------------------------------------------------------------------------------------------------------------|--------------------------------------------------------------------------------------------------------------------------------------------------------------------------------------------------------------------------------------------------------------------------------------------------------------------------------------------------------------------------------------------------------------------------------------------------------------------------------------------------------------------------------------|
| Trial or Study name (geography)                                                                                                                                                                                              | Duration                                   | Age at outcome assessment (years)                                                                                                                                 | Measurement of exposure                                                                    |                                                                                                                                                                                                                                                                                                                                                        | Risk of bias tier                                                                                                                                                                                                                                                                                                                                                                                                                                                                                                                    |
|                                                                                                                                                                                                                              |                                            | Year of tissue sampling                                                                                                                                           |                                                                                            |                                                                                                                                                                                                                                                                                                                                                        |                                                                                                                                                                                                                                                                                                                                                                                                                                                                                                                                      |
| n/a (New Zealand)                                                                                                                                                                                                            |                                            | exposure: Adults<br><br>2007–2008                                                                                                                                 | Blood (serum)<br><br>Lipid adjusted                                                        | directly involved in herbicide production:<br><br>19 (corresponding to 109 pg/g in 1984)                                                                                                                                                                                                                                                               | pg/g fat (p for trend 0.01).<br><br>For exposure back-calculated to child birth < 20 pg/g fat vs ≥20 pg/g fat in fathers: OR of male birth 0.49 (95% CI 0.30 to 0.79). With TCDD in quartiles <20 to ≥100 pg/g (p for trend 0.007).<br><br>For the 21 exposed mothers, the sex ratio was not associated with exposure.<br><br>Risk of bias tier: 2                                                                                                                                                                                   |
| <b>BIRTH WEIGHT AND OTHER BIRTH OUTCOMES</b>                                                                                                                                                                                 |                                            |                                                                                                                                                                   |                                                                                            |                                                                                                                                                                                                                                                                                                                                                        |                                                                                                                                                                                                                                                                                                                                                                                                                                                                                                                                      |
| <b>Tsukimori et al. (2013).</b><br>Blood levels of PCDDs, PCDFs, and coplanar PCBs in Yusho mothers and their descendants: Association with fetal Yusho disease.<br><br>2002–2008<br><br>Yusho Cohort (Japan, Western Japan) | Cross sectional<br><br>~40 years follow-up | 64 mothers, 117 births<br><br>M, F<br><br>Mean (range) age of the mothers at exposure: 15.8 (prenatal–29)<br><br>Mean age (range) at blood sampling: 53.0 (32–70) | 17 PCDD/Fs, 4 DL-PCBs (-77, -81, -126, -169)<br><br>Blood (maternal)<br><br>Lipid adjusted | Mean (SD), median (n = 64) (pg WHO <sub>2005</sub> -TEQ/g fat)<br><br><u>Black baby group</u><br>PCDD-TEQs: 736.5 (526.5), 647.0<br>PCDF-TEQs: 1,923.9 (2,273.8), 1,313.1<br>DL-PCB-TEQs: 57.6 (30.4), 45.6<br><br><u>Non-black baby group</u><br>PCDD-TEQs: 243.0 (275.9), 139.0<br>PCDF-TEQs: 460.7 (905.3), 141.6<br>DL-PCB-TEQs: 31.8 (29.7), 27.1 | <b>Black baby, non-black baby (Foetal Yusho Disease, FYD)</b><br><br>Estimated PCDD-TEQ, PCDF-TEQ, DL-PCB-TEQ, and total TEQ in the maternal blood at delivery associated with significantly increased risk of FYD.<br><br>OR (risk of FYD for a 10-fold increase in blood dioxin) largest for 1,2,3,6,7,8-HexaCDD (OR=28.6, 95% CI 1.67–489.9, p=0.02).<br><br>Levels of 1,2,3,6,7,8-HexaCDD in both the Yusho mothers and their descendants with FYD were higher than the levels in those without FYD.<br><br>Risk of bias tier: 2 |

| Reference                                                                                                                                                                                 | Study type                                                   | Participants in the study                                                                                                                                          | Compounds                                                                      | Levels of exposure                                                                                                                                                                                 | Parameters measured and Measures of effect                                                                                                                                                                                                                                                                                                                                                                                                                                                                                                                                                                                                                                                                                                                         |
|-------------------------------------------------------------------------------------------------------------------------------------------------------------------------------------------|--------------------------------------------------------------|--------------------------------------------------------------------------------------------------------------------------------------------------------------------|--------------------------------------------------------------------------------|----------------------------------------------------------------------------------------------------------------------------------------------------------------------------------------------------|--------------------------------------------------------------------------------------------------------------------------------------------------------------------------------------------------------------------------------------------------------------------------------------------------------------------------------------------------------------------------------------------------------------------------------------------------------------------------------------------------------------------------------------------------------------------------------------------------------------------------------------------------------------------------------------------------------------------------------------------------------------------|
| Trial or Study name (geography)                                                                                                                                                           | Duration                                                     | Age at outcome assessment (years)                                                                                                                                  | Measurement of exposure                                                        |                                                                                                                                                                                                    | Risk of bias tier                                                                                                                                                                                                                                                                                                                                                                                                                                                                                                                                                                                                                                                                                                                                                  |
|                                                                                                                                                                                           |                                                              | Year of tissue sampling                                                                                                                                            |                                                                                |                                                                                                                                                                                                    |                                                                                                                                                                                                                                                                                                                                                                                                                                                                                                                                                                                                                                                                                                                                                                    |
| <b>Tsukimori et al. (2012).</b><br>Maternal exposure to high levels of dioxins in relation to birth weight in women affected by Yusho disease.<br><br>Yusho Cohort (Japan, Western Japan) | Cohort<br><br>41 years                                       | 101 mothers, 190 births<br><br>M, F<br><br>Mean (range) age of the mothers at exposure: 16.8 (prenatal–35)<br><br>At blood sampling: 54.2 (32–75)<br><br>2002–2008 | 17 PCDD/Fs, 4 DL-PCB (-77, -81, -126, -169)<br><br>Blood<br><br>Lipid adjusted | Mean maternal blood levels at sampling (n = 101)<br><br>Total TEQ: 68.92 pg/g fat<br><br>Estimated maternal blood levels at delivery<br><br>Total PCDD/Fs and non-ortho PCB-TEQs: 1,077.1 pg/g fat | <b>Birth weight</b><br><br>Total PCDD-TEQ, total PCDF-TEQ and total non-ortho PCBs levels inversely associated with birth weight:<br><br>Total PCDD-TEQ:<br>adj $\beta$ = -161.9 g; 95% CI = -265.3, -58.6<br>Total PCDF-TEQ:<br>adj $\beta$ = -105.9 g; 95% CI = -179.5, -32.2<br>Total non-ortho PCBs:<br>adj $\beta$ = -178.4 g; 95% CI = -318.3, -38.5<br><br>Significant inverse associations with birth weight for total PCDD-TEQ, total PCDF-TEQ, and total non-ortho PCB-TEQ levels among male infants, but not females.<br><br>Significant inverse associations with birth weight found for 9 congeners among all infants; the adjusted $\beta$ -coefficients largest for 1,2,3,6,7,8-HxCDD and smallest for 2,3,4,7,8-PeCDF.<br><br>Risk of bias tier: 2 |
| <b>Konishi et al. (2009).</b><br>Prenatal exposure to PCDDs/PCDFs and dioxin-like PCBs in relation to birth weight.<br><br>Hokkaido Study on Environment and Children's                   | Cohort<br><br>3 years duration: Subjects recruited 2002-2005 | 398 mothers, 398 births (189 boys, 209 girls)<br><br>M, F<br><br>Maternal mean (SD) age:                                                                           | 17 PCDD/Fs, 12 DL-PCBs<br><br>Blood<br><br>Lipid adjusted                      | Mean (SD) maternal blood levels (n = 398)<br><br>(pg WHO <sub>1998</sub> -TEQ/g fat)<br><br>PCDD-TEQ: 7.3 (3.3)<br>PCDF-TEQ: 3.8 (1.6)                                                             | <b>Birth weight</b><br><br>Based on WHO <sub>2005</sub> -TEQ<br><br>Significant adverse effect observed for total PCDDs-TEQ (adj- $\beta$ = -231.5g, 95% CI -417.4 to -45.6g) and total PCDFs-TEQ (adj- $\beta$ = -258.8g, 95% CI -445.7 to -71.8g).                                                                                                                                                                                                                                                                                                                                                                                                                                                                                                               |

| Reference                                                                                                                                                                                            | Study type        | Participants in the study                                                              | Compounds                                                                               | Levels of exposure                                                                                                                                                                                                                                | Parameters measured and Measures of effect                                                                                                                                                                                                                                                                     |
|------------------------------------------------------------------------------------------------------------------------------------------------------------------------------------------------------|-------------------|----------------------------------------------------------------------------------------|-----------------------------------------------------------------------------------------|---------------------------------------------------------------------------------------------------------------------------------------------------------------------------------------------------------------------------------------------------|----------------------------------------------------------------------------------------------------------------------------------------------------------------------------------------------------------------------------------------------------------------------------------------------------------------|
| Trial or Study name (geography)                                                                                                                                                                      | Duration          | Age at outcome assessment (years)                                                      | Measurement of exposure                                                                 |                                                                                                                                                                                                                                                   | Risk of bias tier                                                                                                                                                                                                                                                                                              |
|                                                                                                                                                                                                      |                   | Year of tissue sampling                                                                |                                                                                         |                                                                                                                                                                                                                                                   |                                                                                                                                                                                                                                                                                                                |
| Health (Japan, Hokkaido, Sapporo)                                                                                                                                                                    |                   | 31.0 (4.7)<br><br>2002–2005                                                            |                                                                                         | PCDD/F-TEQ: 11.1 (4.8)<br>DL-PCB-TEQ: 6.4 (3.5)<br>Total TEQ: 17.5 (7.7)<br><br>(pg WHO <sub>2005</sub> -TEQ/g fat)<br><br>PCDD-TEQ: 7.4 (3.3)<br>PCDF-TEQ: 2.6 (1.1)<br>PCDD/F-TEQ: 10.0 (4.3)<br>DL-PCB-TEQ: 4.9 (2.9)<br>Total-TEQ: 14.9 (6.6) | For male infants, significant adverse associations with birth weight for total PCDDs-TEQ, total PCDD/Fs-TEQ, and total TEQ. Associations not observed among female infants.<br><br>Significant negative association with 2,3,4,7,8-PeCDF (adj-β=-224.5g, 95% CI -387.4 to -61.5g).<br><br>Risk of bias tier: 2 |
| <b>Halldorsson et al. (2009).</b> Dioxin-like activity in plasma among Danish pregnant women: dietary predictors, birth weight and infant development.<br><br>Danish National Birth Cohort (Denmark) | Cohort<br><br>n/a | 100 mother-child pairs<br><br>M, F<br><br>Maternal age (range): 25–35<br><br>1996–2002 | CALUX determined BEQ levels<br><br>Blood<br><br>Lipid adjusted                          | Geometric mean (n = 100) (pg BEQ/g fat)<br><br>46.0<br><br>Percentiles:<br>5 <sup>th</sup> : 7.0<br>25 <sup>th</sup> : 19.6<br>50 <sup>th</sup> : 38.2<br>75 <sup>th</sup> : 56.6<br>95 <sup>th</sup> : 134.6                                     | <b>Birth weight</b><br><br>Plasma dioxin-like activity not associated with birth weight.<br><br>Risk of bias tier: 2                                                                                                                                                                                           |
| <b>Papadopoulou et al. (2013).</b> Maternal dietary intake of dioxins and polychlorinated biphenyls and birth size in the Norwegian Mother and Child Cohort Study (MoBa)                             | Cohort<br><br>n/a | 50,651 mother-child pairs<br><br>M, F<br><br>Maternal age (range): <25–≥35             | 17 PCDD/Fs, 12 DL-PCBs<br><br>FFQ (as part of the MoBa study)<br><br>Not lipid adjusted | Median (IQR) intake of PCDD/Fs and DL-PCBs (n = 50,651) (pg WHO <sub>2005</sub> -TEQ/kg bw/day)<br><br>0.55 (0.37)                                                                                                                                | <b>Gestational age, birth weight, birth head circumference</b><br><br>Newborns of mothers in upper quartile of PCDD/Fs and DL-PCBs intake had 62 g lower birth weight (95% CI -73, -50), 0.26 cm shorter birth length (95% CI -0.31, -0.20) and 0.10 cm shorter head circumference (95% CI -0.14, -            |

| Reference<br>Trial or Study name<br>(geography)                                                                                                                                                                                                    | Study type<br>Duration         | Participants in the study<br>Age at outcome assessment (years)<br>Year of tissue sampling                                   | Compounds<br>Measurement of exposure                           | Levels of exposure                                                                                                           | Parameters measured and Measures of effect<br>Risk of bias tier                                                                                                                                                                                                                                                        |
|----------------------------------------------------------------------------------------------------------------------------------------------------------------------------------------------------------------------------------------------------|--------------------------------|-----------------------------------------------------------------------------------------------------------------------------|----------------------------------------------------------------|------------------------------------------------------------------------------------------------------------------------------|------------------------------------------------------------------------------------------------------------------------------------------------------------------------------------------------------------------------------------------------------------------------------------------------------------------------|
| MoBa Cohort (Norway)                                                                                                                                                                                                                               |                                | Age at outcome assessment: newborns<br><br>2002–2008                                                                        |                                                                |                                                                                                                              | 0.06) than newborns of mothers in lowest quartile of intake.<br><br>Negative association weaker as seafood intake was increasing.<br><br>No association between dietary PCDD/Fs and DL-PCB intake and risk for small-for-gestational age neonate.<br><br>Risk of bias tier: 2                                          |
| <b>Papadopoulou et al. (2014).</b> Maternal diet, prenatal exposure to dioxin-like compounds and birth outcomes in a European prospective mother-child study (NewGeneris).<br><br>European NewGeneris project (Greece, Spain, Norway, Denmark, UK) | Cohort<br><br>n/a              | 604 mother-child pairs<br><br>F<br><br>Median maternal age: 31.3<br><br>Median gestational age: 273.8 days<br><br>2007–2010 | CALUX determined BEQ levels<br><br>Blood<br><br>Lipid adjusted | Median (IQR) (n = 604) (pg BEQ/g fat)<br><br>39.3 (28.2)                                                                     | <b>Gestational age, birth weight, parity</b><br><br>Upper tertile of BEQ-diet score associated with change in birth weight of -121g (95% CI -232, -10g) compared to lower tertile after adjustment.<br><br>Non-significant reduction in gestational age observed (-1.4d, 95% CI-3.8, 1.0d)<br><br>Risk of bias tier: 2 |
| <b>Lawson et al. (2004).</b> Paternal occupational exposure to 2,3,7,8-tetrachlorodibenzo- <i>p</i> -dioxin and birth outcomes of offspring: birth weight, preterm delivery, and birth defects.                                                    | Cohort<br><br>(birth outcomes) | 393 mothers, 1,117 births<br><br>M, F<br><br>Maternal mean (SD) age: Referents:                                             | TCDD<br><br>Blood (serum)<br><br>Lipid adjusted                | Median (range) paternal TCDD at conception retrospective modelled (pg/g fat)<br><br>Referents (n = 79): 6 (2–19)<br>Workers: | <b>Length of gestation, birth weight, birth defects</b> (CNS, CVD, genitourinary, clubfoot, hip/lower limb, cleft lip/palate, Down's syndrome)<br><br>Mean birth weight among full-term babies similar among referents, pre-exposed workers and workers exposed during pregnancy (3,420,                               |

| Reference<br>Trial or Study name<br>(geography)                                                                                                                                                                                                                          | Study type<br>Duration | Participants in the study<br>Age at outcome assessment (years)<br>Year of tissue sampling                                                                                      | Compounds<br>Measurement of exposure                              | Levels of exposure                                                                                                                                                             | Parameters measured and Measures of effect<br>Risk of bias tier                                                                                                                                                                                                                                                                                                   |
|--------------------------------------------------------------------------------------------------------------------------------------------------------------------------------------------------------------------------------------------------------------------------|------------------------|--------------------------------------------------------------------------------------------------------------------------------------------------------------------------------|-------------------------------------------------------------------|--------------------------------------------------------------------------------------------------------------------------------------------------------------------------------|-------------------------------------------------------------------------------------------------------------------------------------------------------------------------------------------------------------------------------------------------------------------------------------------------------------------------------------------------------------------|
| National Institute for Occupational Safety and Health (NIOSH) (USA)                                                                                                                                                                                                      |                        | 26.1 (5.4)<br>Workers before exposure:<br>23.4 (4.6)<br>Workers during exposure:<br>27.4 (5.3)<br><br>Mean age at outcome assessment:<br>9 months<br><br>1987–1988             |                                                                   | - before exposure (n = 221):<br>6 (all pre-exposure births assigned median referent value of 6)<br>- during exposure (n = 291): 254 (3–16,340)<br><br>Current levels: measured | 3,347, and 3,442 g, respectively).<br><br>After adjustment, neither continuous nor categorical TCDD concentration had effect on birth weight.<br><br>Risk of bias tier: 2                                                                                                                                                                                         |
| <b>Wohlfahrt-Veje et al. (2014).</b> Polychlorinated dibenzo- <i>p</i> -dioxins, furans, and biphenyls (PCDDs/PCDFs and PCBs) in breast milk and early childhood growth and IGF1.<br><br>Copenhagen Mother Child Cohort of Growth and Reproduction (Denmark, Copenhagen) | Cohort<br>n/a          | 417 mother-child pairs (218 boys, 199 girls)<br><br>M, F<br><br>Maternal age (range): <25–>35<br><br>Age at outcome assessment: 0, 3 (IGF1), 18 and 36 months<br><br>1997–2001 | 17 PCDD/Fs,<br>12 DL-PCBs<br><br>Human milk<br><br>Lipid adjusted | (pg WHO <sub>2005</sub> -TEQ/g fat) (n = 417)<br><br>Mean: 21.2<br>Median: 20.2<br>Range: 4.9–114.1                                                                            | <b>Physical measurements at birth and early childhood growth until 3 years of age, serum IGF1</b><br><br>Total TEQ associated with lower % fat (-0.45, 95% CI-0.89,-0.04), non-significantly with lower weight and length at birth, accelerated height growth and early weight increase, and increased IGF1 serum levels at 3 months.<br><br>Risk of bias tier: 1 |
| <b>Vartiainen et al. (1998).</b> Birth Weight and Sex of Children and the Correlation                                                                                                                                                                                    | Cross-sectional<br>n/a | 167 mothers, 166 births                                                                                                                                                        | 17 PCDD/Fs, 10 DL-PCBs, 2 mono- <i>ortho</i> PCBs                 | Mean (SD) (primiparae women) (n = 167) (pg/g fat)                                                                                                                              | <b>Birth weight</b><br><br>Mean weights of children were similar in the                                                                                                                                                                                                                                                                                           |

| Reference                                                                                                                                                               | Study type             | Participants in the study                                                         | Compounds                                                          | Levels of exposure                                                                                                                                                             | Parameters measured and Measures of effect                                                                                                                                                                                                                                                                                                                                                                                                                               |
|-------------------------------------------------------------------------------------------------------------------------------------------------------------------------|------------------------|-----------------------------------------------------------------------------------|--------------------------------------------------------------------|--------------------------------------------------------------------------------------------------------------------------------------------------------------------------------|--------------------------------------------------------------------------------------------------------------------------------------------------------------------------------------------------------------------------------------------------------------------------------------------------------------------------------------------------------------------------------------------------------------------------------------------------------------------------|
| Trial or Study name (geography)                                                                                                                                         | Duration               | Age at outcome assessment (years)                                                 | Measurement of exposure                                            |                                                                                                                                                                                | Risk of bias tier                                                                                                                                                                                                                                                                                                                                                                                                                                                        |
|                                                                                                                                                                         |                        | Year of tissue sampling                                                           |                                                                    |                                                                                                                                                                                |                                                                                                                                                                                                                                                                                                                                                                                                                                                                          |
| to the Body Burden of PCDDs/PCDFs and PCBs of the Mother.<br>n/a (Finland)                                                                                              |                        | M, F<br>Age (range) of the mothers: 19–41<br>1987                                 | Human milk<br>Lipid adjusted                                       | Urban area:<br>PCDD/Fs (I-TEQ):<br>26.3 (11.8)<br>DL-PCBs (WHO-TEQ):<br>37.0 (24.8)<br><br>Rural area:<br>PCDD/Fs (I-TEQ):<br>20.1 (6.5)<br>DL-PCBs (WHO-TEQs):<br>26.5 (9.90) | rural and urban areas among primiparae.<br><br>Birth weight, especially of boys, was slightly decreased with increasing concentrations of PCDD/Fs, 2,3,4,7,8-PeCDF, 1,2,3,7,8-PeCDD, and TCDD. When the analysis was restricted to primiparae, no statistically significant correlation between birth weight and PCDD/Fs.<br><br>No correlation found between the weight of the child and PCB-TEQs among all mothers or among boys or girls.<br><br>Risk of bias tier: 1 |
| <b>Tajimi et al. (2005).</b><br>Relationship of PCDD/F and Co-PCB concentration in breast milk with infant birthweights in Tokyo, Japan.<br>n/a (Japan)                 | Cross-sectional<br>n/a | 240 mothers, 240 births<br>M, F<br>Age (range) of the mothers: 25–34<br>1999–2000 | 17 PCDD/Fs, 12 DL-PCBs<br><br>Human milk<br>Lipid adjusted         | Mean (SD) (n = 240)<br>(pg WHO <sub>1998</sub> -TEQ/g fat)<br><br>PCDD/Fs: 14.9 (6.0)<br>DL-PCBs: 10.6 (5.1)<br>Total: 25.6 (9.7)                                              | <b>Birth weight</b><br><br>Statistically significant negative correlation between birth weight and most of the individual congeners. Significant negative correlations with DL-PCB-TEQ, and the sum of PCDD/F+DL-PCB-TEQ.<br><br>Only OCDD significant in adjusted models.<br><br>Risk of bias tier: 2                                                                                                                                                                   |
| <b>Govarts et al. (2016).</b><br>Combined effects of prenatal exposures to environmental chemicals on birth weight<br><br>Flemish Environment and Health Study FLEHS II | Cross-sectional<br>n/a | 248 mother-child pairs (128 boys, 120 girls)<br>M, F<br>Maternal age              | CALUX determined BEQs<br><br>Cord blood (plasma)<br>Lipid adjusted | Mean (95% CI)<br>P25, P75<br>(n = 248)<br>(pg BEQ/g fat)<br><br>17.4 (16.3-18.6)<br>13.0, 24.00                                                                                | <b>Birth weight</b><br><br>BEQs not associated with birth weight.<br><br>Risk of bias tier: 2                                                                                                                                                                                                                                                                                                                                                                            |

| Reference                                                                                                                                                                                | Study type             | Participants in the study                                                                                          | Compounds                                                    | Levels of exposure                                                                                                                                                                                                                                                                                                                                                                                                 | Parameters measured and Measures of effect                                                                                                                                                                                                                                                                                                                                                                                                                                                                                                                                                                                                                                                                                                                                                                 |
|------------------------------------------------------------------------------------------------------------------------------------------------------------------------------------------|------------------------|--------------------------------------------------------------------------------------------------------------------|--------------------------------------------------------------|--------------------------------------------------------------------------------------------------------------------------------------------------------------------------------------------------------------------------------------------------------------------------------------------------------------------------------------------------------------------------------------------------------------------|------------------------------------------------------------------------------------------------------------------------------------------------------------------------------------------------------------------------------------------------------------------------------------------------------------------------------------------------------------------------------------------------------------------------------------------------------------------------------------------------------------------------------------------------------------------------------------------------------------------------------------------------------------------------------------------------------------------------------------------------------------------------------------------------------------|
| Trial or Study name (geography)                                                                                                                                                          | Duration               | Age at outcome assessment (years)<br><br>Year of tissue sampling                                                   | Measurement of exposure                                      |                                                                                                                                                                                                                                                                                                                                                                                                                    | Risk of bias tier                                                                                                                                                                                                                                                                                                                                                                                                                                                                                                                                                                                                                                                                                                                                                                                          |
| (Belgium, Flanders)                                                                                                                                                                      |                        | (range):<br>≤25->35<br><br>Age at outcome assessment:<br>newborns<br><br>2008–2009                                 |                                                              |                                                                                                                                                                                                                                                                                                                                                                                                                    |                                                                                                                                                                                                                                                                                                                                                                                                                                                                                                                                                                                                                                                                                                                                                                                                            |
| <b>Tsukimori et al. (2008).</b><br>Long-term effects of polychlorinated biphenyls and dioxins on pregnancy outcomes in women affected by the Yusho incident.<br><br>Yusho Cohort (Japan) | Cohort<br><br>36 years | 214 mothers (512 pregnancies)<br><br>F<br><br>Maternal mean (SD) age at interview:<br>59.4 (12.2)<br><br>2001–2005 | PeCDF,<br>PCB-126<br><br>Blood (serum)<br><br>Lipid adjusted | Geometric mean (min-max) (n = 97) (pg/g fat)<br><br><u>Year of delivery:</u><br><u>1968–1977</u><br>PeCDF:<br>2,899.3 (112.1–19942.7)<br>PCB-126:<br>336.4 (89.5–1705.3)<br><br><u>Year of delivery:</u><br><u>1978–1987</u><br>PeCDF:<br>697.7 (52.4–2289.6)<br>PCB-126:<br>159.0 (94.7–330.5)<br><br><u>Year of delivery:</u><br><u>1988–2003</u><br>PeCDF:<br>39.5 (4.0–951.8)<br>PCB-126:<br>60.4 (16.9–118.8) | <b>Spontaneous abortion, preterm delivery, pregnancy loss</b><br><br>Within the first 10 years after exposure (pregnancy years 1968–1977), the proportion of preterm delivery (OR <sub>adj</sub> = 5.70; 95% CI 1.17–27.79; p=0.03) significantly increased compared with the proportion in pregnancy years 1958–1967 (10 years before the incident).<br><br>Spontaneous abortion (OR <sub>adj</sub> =2.09; 95% CI 0.84–5.18), and pregnancy loss (OR <sub>adj</sub> =2.11; 95% CI 0.92-4.87) more frequent (OR=2.18; 95% CI 1.02-4.66). Not significant in pregnancy years 1968–1977.<br><br>No significant increases in the proportions of adverse pregnancy outcomes in pregnancies occurring during 1978–1987 or 1988–2003 compared with those in pregnancies before 1968.<br><br>Risk of bias tier: 2 |



| Reference<br>Trial or Study name<br>(geography)                                                                                                                        | Study type<br>Duration           | Participants in the study<br>Age at outcome assessment (years)<br>Year of tissue sampling                                                                                                                                         | Compounds<br>Measurement of exposure            | Levels of exposure                                                                             | Parameters measured and Measures of effect<br>Risk of bias tier                                                                                                                                                                                                                                                                                                                                                                                                                                                                                                                                                                                                                                                                                                                                                |
|------------------------------------------------------------------------------------------------------------------------------------------------------------------------|----------------------------------|-----------------------------------------------------------------------------------------------------------------------------------------------------------------------------------------------------------------------------------|-------------------------------------------------|------------------------------------------------------------------------------------------------|----------------------------------------------------------------------------------------------------------------------------------------------------------------------------------------------------------------------------------------------------------------------------------------------------------------------------------------------------------------------------------------------------------------------------------------------------------------------------------------------------------------------------------------------------------------------------------------------------------------------------------------------------------------------------------------------------------------------------------------------------------------------------------------------------------------|
| <b>Eskenazi et al. (2003).</b><br>Maternal serum dioxin levels and birth outcomes in Women of Seveso, Italy.<br><br>Seveso Women's Health Study (SWHS) (Italy, Seveso) | Cohort<br><br>20 years           | 510 mothers, 888 pregnancies<br><br>M, F<br><br>Mean (SD) maternal age at explosion: 19.1 (7.9), at interview: 3.9.7 (8.0)<br><br>Age at outcome assessment: newborns<br><br>1976–1977 (n=413)<br>1978–1981 (n=12)<br>1996 (n=19) | TCDD<br><br>Blood (serum)<br><br>Lipid adjusted | Median (IQR) maternal level at time of explosion (n = 510) (pg/g fat)<br><br>46.6 (24.3–104.0) | <b>Congenital anomalies/disorders, spontaneous abortions, birth weight, gestational age</b><br><br>No association of log <sub>10</sub> TCDD in samples collected close to the explosion with spontaneous abortions (adj-OR=0.8; 95% CI=0.6–1.2), with birth weight (adj-β=-4g; 95% CI=-68-60), or with births that were small for gestational age (adj-OR=1.2; 95% CI=0.8–1.8).<br><br>Associations with birth weight (adj-β=-92g; 95% CI=-204–19) and with small for gestational age (adj-OR=1.4; 95% CI=0.6–2.9) were stronger for pregnancies within first 8 years after exposure.<br><br>TCDD associated with 1.0–1.3 day non-significant adjusted decrease in gestational age.<br><br>TCDD associated with a 20-50% non-significant increase in the odds of preterm delivery.<br><br>Risk of bias tier: 1 |
| <b>Wesselink et al. (2014).</b><br>Maternal dioxin exposure and pregnancy outcomes over 30 years of follow-up in Seveso<br><br>Seveso Women's Health                   | Cohort<br><br>30 years follow-up | 617 mothers, 1,211 pregnancies<br><br>M, F<br><br>Average (SD) age at exposure: 16.9                                                                                                                                              | TCDD<br><br>Blood (serum)<br><br>Lipid adjusted | Median (IQR) (n = 617) (pg/g fat)<br><br>55.0 (27.0–184.0)<br><br>Estimated TCDD levels at     | <b>Spontaneous abortion, fetal growth, birth weight and birth defects</b><br><br>No association between estimated maternal serum TCDD at pregnancy and spontaneous abortion, foetal growth or gestational length.                                                                                                                                                                                                                                                                                                                                                                                                                                                                                                                                                                                              |

| Reference<br>Trial or Study name<br>(geography)                                                                                                                                                                                                | Study type<br>Duration                                                                       | Participants in the study<br>Age at outcome assessment (years)<br>Year of tissue sampling                                                                | Compounds<br>Measurement of exposure            | Levels of exposure                                                                                                                                                                                                                                                                                                                                                                                           | Parameters measured and Measures of effect<br>Risk of bias tier                                                                                                                                                                                                                                                                                                                                                                         |
|------------------------------------------------------------------------------------------------------------------------------------------------------------------------------------------------------------------------------------------------|----------------------------------------------------------------------------------------------|----------------------------------------------------------------------------------------------------------------------------------------------------------|-------------------------------------------------|--------------------------------------------------------------------------------------------------------------------------------------------------------------------------------------------------------------------------------------------------------------------------------------------------------------------------------------------------------------------------------------------------------------|-----------------------------------------------------------------------------------------------------------------------------------------------------------------------------------------------------------------------------------------------------------------------------------------------------------------------------------------------------------------------------------------------------------------------------------------|
| Study (SWHS) (Italy, Seveso)                                                                                                                                                                                                                   |                                                                                              | (9.0), at pregnancy: 29.9 (5.5)<br><br>1976, 1996–1998                                                                                                   |                                                 | pregnancy: 9.9 (4.3–29.6)                                                                                                                                                                                                                                                                                                                                                                                    | Non-significant inverse association between maternal serum TCDD in 1976 and birth-weight.<br><br>Risk of bias tier: 1                                                                                                                                                                                                                                                                                                                   |
| <b>Michalek et al. (1998).</b><br>Paternal dioxin, preterm birth, intrauterine growth retardation, and infant death.<br><br>Air Force Health Study (AFHS, Operation Ranch Hand) (US Veterans that served in Southeast Asia during Vietnam War) | Cohort<br><br>11–33 years<br><br>Children were followed-up from pregnancy to 18 years of age | 2,134 fathers serving in South-East Asia, 2,082 children<br><br>M, F<br><br>Age at outcome assessment: children born between 1959–1992<br><br>1987, 1992 | TCDD<br><br>Blood<br><br>Not lipid adjusted     | Paternal TCDD<br>Median (range) (pg/g fat)<br><br><u>Comparison:</u><br>3.7 (0–10)<br><u>Background:</u><br>5.6 (0–10)<br><u>'Low':</u><br>39 (11.1–78.8)<br><u>'High':</u><br>153.4 (79.2–1,424.8)<br><br>Initial TCDD levels at conception estimated using a constant half-life of 8.7 years.<br>Cut-point of 79 pg/g fat as the median initial TCDD for Ranch Hand children having an initial TCDD level. | <b>Preterm birth, intrauterine growth retardation, infant death</b><br><br>Preterm birth: risk increased at the 'High' (RR=1.3) and 'Background' (RR=1.4) exposure groups.<br><br>Intrauterine growth: risk not increased in any exposure category<br><br>Infant death: risk increased in all Ranch Hand children. Greatest increase in the 'High' exposure group (RR=4.5) and 'Background' group (RR=3.2).<br><br>Risk of bias tier: 2 |
| <b>Schnorr et al. (2001).</b><br>Spontaneous abortion, sex ratio, and paternal occupational exposure to 2,3,7,8-tetrachlorodibenzo-                                                                                                            | Cross-sectional<br><br>n/a                                                                   | 502 (281 workers, 260 referents), 1,339 pregnancies (632 from workers' wives, 707 from                                                                   | TCDD<br><br>Blood (serum)<br><br>Lipid adjusted | Paternal TCDD at conception [Median (range)] (pg/g fat):                                                                                                                                                                                                                                                                                                                                                     | <b>Pregnancy history and outcomes</b><br><br>No association between paternal TCDD level at time of conception and spontaneous abortion observed among pregnancies fathered by                                                                                                                                                                                                                                                           |

| Reference<br><br>Trial or Study name<br>(geography)                                                                                                                                                                                                       | Study type<br><br>Duration        | Participants in<br>the study<br><br>Age at outcome<br>assessment<br>(years)<br><br>Year of tissue<br>sampling                                                              | Compounds<br><br>Measurement of<br>exposure                                   | Levels of exposure                                                                                                                                                                                                                                                                                                                                           | Parameters measured and Measures of<br>effect<br><br>Risk of bias tier                                                                                                                                                                                                                                                                                                                                                                  |
|-----------------------------------------------------------------------------------------------------------------------------------------------------------------------------------------------------------------------------------------------------------|-----------------------------------|----------------------------------------------------------------------------------------------------------------------------------------------------------------------------|-------------------------------------------------------------------------------|--------------------------------------------------------------------------------------------------------------------------------------------------------------------------------------------------------------------------------------------------------------------------------------------------------------------------------------------------------------|-----------------------------------------------------------------------------------------------------------------------------------------------------------------------------------------------------------------------------------------------------------------------------------------------------------------------------------------------------------------------------------------------------------------------------------------|
| <p><i>p</i>-dioxin.</p> <p>National Institute for Occupational Safety and Health (NIOSH) (USA, New Jersey and Missouri)</p>                                                                                                                               |                                   | <p>referents wives)</p> <p>M, F</p> <p>Mean (SD) age of wives at 1<sup>st</sup> pregnancy:<br/>Referents: 22.3 (4.2)<br/>Workers: 21.8 (4.2)</p> <p>1987–1988</p>          |                                                                               | <p>Referent: 6 (2–19)</p> <p>Workers:<br/>- before exposure:<br/>6 (all pre-exposure births assigned median referent value of 6)<br/>- during exposure:<br/>254 (3-16,340)</p>                                                                                                                                                                               | <p>workers with TCDD levels of:</p> <p>&lt; 20 ppt (OR=0.77, 95% CI=0.48–1.22)<br/>20 to &lt; 255 ppt (OR=0.81, 95% CI=0.40–1.63)<br/>255 to &lt; 1,120, (OR=0.69, 95% CI=0.30–1.58)<br/>≥1,120 ppt (OR=0.95, 95% CI=0.42–2.17)<br/>compared to pregnancies fathered by referents.</p> <p>Risk of bias tier: 2</p>                                                                                                                      |
| <p><b>Vafeiadi et al. (2013).</b> In Utero Exposure to Dioxins and Dioxin-like Compounds and Anogenital Distance in Newborns and Infants.</p> <p>European NewGeneris project: Rhea study (Greece, Crete, Heraklion) and Hmar study (Spain, Barcelona)</p> | <p>Cross-sectional</p> <p>n/a</p> | <p>121 newborns (62 boys, 59 girls),<br/>462 young children</p> <p>M (239), F (223)</p> <p>Median (range) age at outcome assessment: 16 (1–31) months</p> <p>2007–2008</p> | <p>CALUX determined BEQ levels</p> <p>Blood (serum)</p> <p>Lipid adjusted</p> | <p>Maternal levels (n = 700)<br/>Median (range)<br/>(pg BEQ/g fat)</p> <p>Newborns:<br/>ALL: 53.6<br/>'Low'-level group:<br/>42.5 (6–53.6)<br/>'High'-level group:<br/>66.1 (53.7–106.3)</p> <p>Young children:<br/>ALL: 50.3<br/>'Low'-level group:<br/>34.7 (range, 6–50.2)<br/>'High'-level group:<br/>63.5 (50.4–225.7)</p> <p>* Values above median</p> | <p><b>Anogenital distance (AGD), anoscrotal distance (ASD), and penis width (PW)</b> in boys (119 newborn and 239 young boys)</p> <p><b>Anoclitoral (ACD) and anofourchetal distance (AFD)</b> in girls (118 newborn and 223 young girls)</p> <p>After adjusting for potential confounders, the AGD was -0.44 mm (95% CI -0.80, -0.08) per 10 pg BEQ/g fat.</p> <p>No associations were found in girls.</p> <p>Risk of bias tier: 1</p> |

| Reference<br>Trial or Study name<br>(geography)                                                                                                                                    | Study type<br>Duration     | Participants in<br>the study<br>Age at outcome<br>assessment<br>(years)<br>Year of tissue<br>sampling                                             | Compounds<br>Measurement of<br>exposure                                            | Levels of exposure                                                                                                                        | Parameters measured and Measures of<br>effect<br>Risk of bias tier                                                                                                                                                                                                                                                                                                |
|------------------------------------------------------------------------------------------------------------------------------------------------------------------------------------|----------------------------|---------------------------------------------------------------------------------------------------------------------------------------------------|------------------------------------------------------------------------------------|-------------------------------------------------------------------------------------------------------------------------------------------|-------------------------------------------------------------------------------------------------------------------------------------------------------------------------------------------------------------------------------------------------------------------------------------------------------------------------------------------------------------------|
|                                                                                                                                                                                    |                            |                                                                                                                                                   |                                                                                    | were categorized as 'high' whereas values below median were categorized as 'low' in both age groups                                       |                                                                                                                                                                                                                                                                                                                                                                   |
| <b>Vafeiadi et al. (2014).</b> In Utero Exposure to Compounds with Dioxin-like Activity and Birth Outcomes<br><br>European NewGeneris project (Greece, Spain, Norway, Denmark, UK) | Cross-sectional<br><br>n/a | 967 mother-child pairs<br><br>M, F<br><br>48% boys among those with cord plasma<br><br>50% boys among those with maternal plasma<br><br>2006–2010 | CALUX determined BEQ levels<br><br>Blood (serum), cord blood<br><br>Lipid adjusted | Mean / Median (pg BEQ /g fat)<br><br>Cord blood samples (n = 269):<br>38.0 / 34.2<br><br>Maternal blood samples (n = 791):<br>39.0 / 38.3 | <b>Birth weight, length, head circumference</b><br><br>Gestational age (weeks)<br><br>Lowest tertile: Reference<br>Medium tertile: -0.1 (95% CI, -0.5 to 0.3)<br>Highest tertile: -0.4 (95% CI, -0.8 to -0.1)<br>Test for trend: p-value =0.029<br><br>No significant trends for birth weight (p=0.22) or head circumference (p=0.41)<br><br>Risk of bias tier: 1 |

AGD: anogenital distance; ASD: anoscrotal distance; PW: penis width; ACD: anoclitlitoral distance; AFD: anofourchetal distance; FYD: Foetal Yusho Disease; n/a: not applicable.

#### A.8.4. Studies on thyroid disease and thyroid hormones

**Table 68.** Epidemiological studies on the association between exposure to PCDD/Fs and DL-PCBs and **thyroid disease and thyroid hormones**. Details about the risk of bias appraisal can be found in **Annex A.9.4**.

| Reference<br>Trial or Study name<br>(geography)                                                                                                                                                                                      | Study type<br>Duration                                                             | Participants in the study<br>Sex (M/F)<br>Age at outcome assessment (years)<br>Year of tissue sampling                                                                                                | Compounds<br>Measurement of exposure                                   | Levels of exposure                                                                                                                                                                           | Parameters measured and Measures of effect<br>Risk of bias tier                                                                                                      |
|--------------------------------------------------------------------------------------------------------------------------------------------------------------------------------------------------------------------------------------|------------------------------------------------------------------------------------|-------------------------------------------------------------------------------------------------------------------------------------------------------------------------------------------------------|------------------------------------------------------------------------|----------------------------------------------------------------------------------------------------------------------------------------------------------------------------------------------|----------------------------------------------------------------------------------------------------------------------------------------------------------------------|
| <b>STUDIES IN ADULTS</b>                                                                                                                                                                                                             |                                                                                    |                                                                                                                                                                                                       |                                                                        |                                                                                                                                                                                              |                                                                                                                                                                      |
| <b>Calvert et al. (1999).</b><br>Evaluation of diabetes mellitus, serum glucose, and thyroid function among United States workers exposed to 2,3,7,8-tetrachlorodibenzo- <i>p</i> -dioxin.<br><br>n/a (USA, New Jersey and Missouri) | Cross-sectional<br><br>Exposure during employment: 1951-1969 and between 1958-1972 | 541 (281 workers from two TCP plants, 260 referents from area)<br><br>M (mostly), F<br><br>Mean (SD) age at outcome assessment:<br>Workers: 55.4 (10.3)<br>Referent group: 56 (10.5)<br><br>1987–1988 | TCDD<br><br>Blood (serum)<br><br>Lipid adjusted                        | Mean (range) (pg/g fat)<br><br>Workers: 220 (ND–3,400)<br><br>Referents: 7 (ND–20) (p<0.001)<br><br>Estimated TCDD when occupational exposure stopped (back-extrapolated): 1,900 (ND–30,000) | <b>TSH, T4, free T4 index</b><br><br>No association between TCDD exposure and TSH or T4. Only (positive) association with free T4 index.<br><br>Risk of bias tier: 1 |
| <b>Johnson et al. (2001).</b><br>Serum hormone levels in humans with low serum concentrations of 2,3,7,8-TCDD.                                                                                                                       | Cross sectional<br><br>n/a                                                         | 32 workers having sprayed herbicides<br><br>M                                                                                                                                                         | TCDD<br><br>Blood (serum)<br><br>No information about lipid adjustment | Mean <10 pg/g<br><br>Estimated historical: 50–100 pg/g                                                                                                                                       | <b>TSH, T4, T3</b><br><br>Inverse associations between estimated historical TCDD and TSH and T3.<br><br>Risk of bias tier: 2                                         |

| Reference<br>Trial or Study name<br>(geography)                                                                                                                                                                                                                                          | Study type<br>Duration                              | Participants in the study<br>Sex (M/F)<br>Age at outcome assessment (years)<br>Year of tissue sampling                                                                                                                                                          | Compounds<br>Measurement of exposure                                                                                                                  | Levels of exposure                                                                                                                                                                                                                                                                                                                                                  | Parameters measured and Measures of effect<br>Risk of bias tier                                                                            |
|------------------------------------------------------------------------------------------------------------------------------------------------------------------------------------------------------------------------------------------------------------------------------------------|-----------------------------------------------------|-----------------------------------------------------------------------------------------------------------------------------------------------------------------------------------------------------------------------------------------------------------------|-------------------------------------------------------------------------------------------------------------------------------------------------------|---------------------------------------------------------------------------------------------------------------------------------------------------------------------------------------------------------------------------------------------------------------------------------------------------------------------------------------------------------------------|--------------------------------------------------------------------------------------------------------------------------------------------|
| n/a (Australia, Victoria)                                                                                                                                                                                                                                                                |                                                     | Mean (range) age at outcome assessment: 48 (29-76)<br><br>Year of tissue sampling: not clear.                                                                                                                                                                   |                                                                                                                                                       |                                                                                                                                                                                                                                                                                                                                                                     | <i>Comments:</i> Small study. Non informative.                                                                                             |
| <b>Pavuk et al. (2003).</b><br>Serum 2,3,7,8-tetrachlorodibenzo- <i>p</i> -dioxin (TCDD) levels and thyroid function in Air Force veterans of the Vietnam War.<br><br>Air Force Health Study (AFHS, Operation Ranch Hand) (US Veterans that served in Southeast Asia during Vietnam War) | Cross-sectional and Longitudinal<br><br>11–35 years | 1,009 exposed (Ranch Hand) and 1,429 internal referents (comparison veterans)<br><br>M<br><br>Mean (SD) age at outcome assessment:<br>Comparison: 48.8 (7.7)<br>Background: 49.9 (7.4)<br>Low TCDD: 50.2 (7.7)<br>High TCDD: 46.3 (7.2)<br><br>1987, 1992, 1997 | TCDD<br><br>Blood (serum)<br><br>Lipid adjusted<br><br>Sampling/analysis dates: 1982, 1985, 1987, 1992, 1997 (serum was analysed in 1987, 1992, 1997) | Mean (SD) in 1987 (pg/g fat)<br><br><u>Comparison:</u><br>4.6 (2.9)<br><u>Background:</u><br>5.8 (2.3)<br><u>'Low':</u><br>15.6 (4.1)<br><u>'High':</u><br>69.4 (67.9)<br><br>Mean (SD) extrapolated levels at the end of the last tour of duty in Vietnam using a constant half-life of 8.7 years<br><br><u>'Low':</u> 55.0 (18.0)<br><u>'High':</u> 302.5 (327.3) | <b>TSH, T4, T3 uptake, free T4 index</b><br><br>TSH slightly but significantly higher in 'High' exposed group.<br><br>Risk of bias tier: 1 |

| Reference<br>Trial or Study name<br>(geography)                                                                                                                                                | Study type<br>Duration     | Participants in the study<br>Sex (M/F)<br>Age at outcome assessment (years)<br>Year of tissue sampling                                                                                        | Compounds<br>Measurement of exposure                                                                             | Levels of exposure                                                                          | Parameters measured and Measures of effect<br>Risk of bias tier                                                                                     |
|------------------------------------------------------------------------------------------------------------------------------------------------------------------------------------------------|----------------------------|-----------------------------------------------------------------------------------------------------------------------------------------------------------------------------------------------|------------------------------------------------------------------------------------------------------------------|---------------------------------------------------------------------------------------------|-----------------------------------------------------------------------------------------------------------------------------------------------------|
| <b>Foster et al. (2005).</b><br>Dioxin-like activity and maternal thyroid hormone levels in second trimester maternal serum.<br><br>n/a (South Western Ontario, Canada,)                       | Cross-sectional<br><br>n/a | 150<br><br>F (pregnant)<br><br>Age (SD) at outcome assessment: 38.0 (0.2)<br><br>2002–2003                                                                                                    | CALUX determined BEQ levels<br><br>Blood (serum)<br><br>Lipid adjusted                                           | pg BEQs/g fat<br><br>Mean (SEM): 0.34±0.01<br><br>Median (range): 0.27 (0.15–0.73)          | <b>TSH, T4</b><br><br>No association with CALUX-BEQs.<br><br>Risk of bias tier: 2<br><br><i>Comments:</i> Very low TEQs. Non-informative.           |
| <b>Bloom et al. (2006).</b><br>Chronic exposure to dioxin-like compounds and thyroid function among New York anglers.<br><br>New York State Angler Cohort Study (NYSACS) (New York State, USA) | Cross sectional<br><br>n/a | 38 (22 having consumed Ontario Lake fish-high PCB, 15 non-consumers of sportfish)<br><br>M, F<br><br>Median (range) age at outcome assessment/blood collection: 39.5 (29-45)<br><br>1993–1994 | 17 PCDD/Fs<br>4 DL-PCBs (-77, -81, -126, -169)<br><br>Blood (serum)<br><br>No information about lipid adjustment | Median (range) (pg WHO <sub>1998</sub> -TEQ/g)<br><br>Upper bound 0.141 (0.050–0.302)       | <b>TSH, free T4, free T3</b><br><br>No association with WHO-TEQs.<br><br>Risk of bias tier: 2<br><br><i>Comments:</i> Small study. Non informative. |
| <b>Turyk et al. (2006).</b><br>Associations of organochlorines with endogenous hormones in                                                                                                     | Cross-sectional<br><br>n/a | 56<br><br>M                                                                                                                                                                                   | 17 PCDD/Fs, 10 DL-PCBs (-77, -81, -126, -169, -105, -114, -118, -123, -157, -167)                                | Mean (Min, Max) (pg WHO <sub>1998</sub> -TEQ/g fat)<br><br><u>Sport caught fish eaters:</u> | <b>T3, T4, TSH, SHBG</b><br><br>Inverse association observed between total TEQ and TSH. Chance finding cannot be                                    |



| Reference<br>Trial or Study name<br>(geography)                                                                                                                                        | Study type<br>Duration          | Participants in the study<br>Sex (M/F)<br>Age at outcome assessment (years)<br>Year of tissue sampling          | Compounds<br>Measurement of exposure                                                                                             | Levels of exposure                                                                                                                                    | Parameters measured and Measures of effect<br>Risk of bias tier                                                                                                                                                     |
|----------------------------------------------------------------------------------------------------------------------------------------------------------------------------------------|---------------------------------|-----------------------------------------------------------------------------------------------------------------|----------------------------------------------------------------------------------------------------------------------------------|-------------------------------------------------------------------------------------------------------------------------------------------------------|---------------------------------------------------------------------------------------------------------------------------------------------------------------------------------------------------------------------|
| male Great Lakes fish consumers and nonconsumers.<br><br>n/a (Lakes Michigan, Huron and Erie, USA)                                                                                     |                                 | Mean age at outcome assessment: Sport caught fish eaters: 49.6<br>Referents: 48.0<br><br>1993–1994              | Blood (Serum)<br><br>Lipid adjusted                                                                                              | 46 (19, 105)<br><br><u>Referents:</u><br>21 (11, 42)                                                                                                  | excluded (this was the only significant finding for total TEQ out of 10 outcomes tested).<br><br>Risk of bias tier: 1<br><br><i>Comments:</i> Limited quality due to small sample size and possible chance finding. |
| <b>Chevrier et al. (2014).</b><br>Serum Dioxin concentrations and thyroid hormone levels in the Seveso Women's Health Study.<br><br>Seveso Women's Health Study (SWHS) (Italy, Seveso) | Cohort<br><br>Follow up to 2008 | 724–909<br><br>F<br><br>Average (SD) age at outcome assessment: 19.7 (11.2)<br><br>1976 (n=981)<br>1996 (n=260) | TCDD<br><br>Blood (serum)<br><br>Lipid adjusted<br><br>TCDD serum levels: 1976 and 1996.<br><br>Thyroid hormones: 1996 and 2008. | Median (IQR) (pg/g fat)<br><br>1976: 60.2 (28.5–163.0)<br>1996: 7.0 (4.2–12.9)<br><br>Median total WHO <sub>2005</sub> -TEQ<br>1996: 25.6 (19.7–35.8) | <b>TSH, T4, free T3, free T4</b><br><br>Inverse association between 1976 TCDD and T4, but not with free T4, free T3 or TSH.<br><br>Risk of bias tier: 1                                                             |
| <b>STUDIES IN NEWBORNS OR CHILDREN</b>                                                                                                                                                 |                                 |                                                                                                                 |                                                                                                                                  |                                                                                                                                                       |                                                                                                                                                                                                                     |
| <b>Nagayama et al. (1998).</b><br>Postnatal exposure to chlorinated dioxins and related chemicals on thyroid hormone status in Japanese breast-fed infants.<br><br>n/a (Japan)         | Cross-sectional<br><br>n/a      | 36 (children)<br><br>Sex not specified<br><br>Age at outcome assessment: 1<br><br>Year of human                 | TEQ (17 PCDD/Fs, DL-PCBs, congeners not specified)<br><br>Estimated intake human milk<br><br>Lipid adjusted                      | Estimated mean total intake: 34 (6–84) ng TEQ/Kg bw                                                                                                   | <b>TSH, T4, T3, TBG</b><br><br>T3 and T4 inversely associated with estimated intake.<br><br>Risk of bias tier: 2<br><br><i>Comments:</i> Small study. Non informative.                                              |

| Reference<br>Trial or Study name<br>(geography)                                                                                                                                                                                                 | Study type<br>Duration                            | Participants in the study<br>Sex (M/F)<br>Age at outcome assessment (years)<br>Year of tissue sampling                                         | Compounds<br>Measurement of exposure                                                   | Levels of exposure                                                               | Parameters measured and Measures of effect<br>Risk of bias tier                                                                                                                                                                                                                        |
|-------------------------------------------------------------------------------------------------------------------------------------------------------------------------------------------------------------------------------------------------|---------------------------------------------------|------------------------------------------------------------------------------------------------------------------------------------------------|----------------------------------------------------------------------------------------|----------------------------------------------------------------------------------|----------------------------------------------------------------------------------------------------------------------------------------------------------------------------------------------------------------------------------------------------------------------------------------|
|                                                                                                                                                                                                                                                 |                                                   | milk sampling: not reported                                                                                                                    |                                                                                        |                                                                                  |                                                                                                                                                                                                                                                                                        |
| <b>Matsuura et al. (2001).</b><br>Effects of dioxins and polychlorinated biphenyls (PCBs) on thyroid function in infants born in Japan - The second report from research on environmental health.<br><br>Dioxins and PCBs in human milk (Japan) | Cross-sectional<br><br>n/a                        | 390 (children: 337 breast-fed infants and 53 bottle-fed infants)<br><br>Sex not specified<br><br>Age at outcome assessment: 1<br><br>1998–1999 | 17 PCDD/Fs, 12 DL-PCBs<br><br>Human milk (at 30 days postpartum)<br><br>Lipid adjusted | Mean<br>(pg WHO <sub>1998</sub> -TEQ/g fat)<br>20–25                             | <b>TSH, T4, free T4, T3</b><br><br>No association with exposure<br><br>Risk of bias tier: 2                                                                                                                                                                                            |
| <b>Nagayama et al. (2001).</b><br>Effects of contamination level of dioxins and related chemicals on thyroid hormone and immune response systems in patients with “Yusho”<br><br>Yusho Cohort (Japan)                                           | Cross-sectional<br><br>26–29 years                | 16 (3 males, 13 females)<br><br>Age at outcome assessment: 28–75<br><br>1994–1995                                                              | 17 PCDD/Fs, 12 DL-PCBs<br><br>Blood<br><br>Lipid adjusted                              | Median (range)<br>(pg WHO <sub>1998</sub> -TEQ/g fat)<br><br>222.4 (27.8–1048.5) | <b>T3, T4, TSH</b><br><br>T3, T4, free T4 and TSH at their normal levels except for one subject in which T4 was slightly higher than normal.<br><br>No significant correlation between the blood TEQ concentrations and the serum levels of T3, T4 or TSH.<br><br>Risk of bias tier: 2 |
| <b>Wang et al. (2005).</b> In utero exposure to dioxins and polychlorinated biphenyls and its relations to thyroid function and growth hormone in newborns.                                                                                     | Cross-sectional<br><br>Infants < 3 months of age. | 118 newborns<br><br>M, F<br><br>Mean (SD) age of mother: 29 (4)                                                                                | 17 PCDD/Fs, 12 DL-PCBs<br><br>Placenta<br><br>Lipid adjusted                           | pg WHO <sub>1998</sub> -TEQ/g fat<br><br>Mean (SD):<br>16.20 (6.14)              | <b>TSH, T4, free T4, T3, TBG</b><br><br>Positive associations between total TEQs and T3 and TBG in female newborns. No significant associations with free T4 or TSH.                                                                                                                   |

| Reference<br>Trial or Study name<br>(geography)                                                                                                                                   | Study type<br>Duration                  | Participants in the study<br>Sex (M/F)<br>Age at outcome assessment (years)<br>Year of tissue sampling                  | Compounds<br>Measurement of exposure                                                           | Levels of exposure                                                                                                                           | Parameters measured and Measures of effect<br>Risk of bias tier                                                                                                                                              |
|-----------------------------------------------------------------------------------------------------------------------------------------------------------------------------------|-----------------------------------------|-------------------------------------------------------------------------------------------------------------------------|------------------------------------------------------------------------------------------------|----------------------------------------------------------------------------------------------------------------------------------------------|--------------------------------------------------------------------------------------------------------------------------------------------------------------------------------------------------------------|
| Part of a prospective study of dioxins/PCBs for the general population (Taiwan)                                                                                                   |                                         | Infants:<br>newborns<br><br>2000–2001                                                                                   |                                                                                                |                                                                                                                                              | Risk of bias tier: 2<br><br><i>Comments:</i> Data analysed in several ways and with various TEQs.                                                                                                            |
| <b>Maervoet et al. (2007).</b><br>Association of Thyroid Hormone Concentrations with Levels of Organochlorine Compounds in Cord Blood of Neonates.<br><br>n/a (Flanders, Belgium) | Cross-sectional                         | 138 newborns<br><br>M, F<br><br>Age at outcome assessment: after birth<br><br>2002–2004                                 | CALUX determined BEQ levels<br><br>Cord blood<br><br>Lipid adjusted                            | pg BEQs/g fat<br><br>Mean (SD):<br>30.6 (20.6)<br><br>Median (5th, 95th %):<br>26.3 (7.4, 64.9)                                              | <b>TSH, free T4, free T3</b><br><br>Inverse associations with free T4 and free T3, but not TSH<br><br>Risk of bias tier: 1                                                                                   |
| <b>Nagayama et al. (2007a).</b><br>Concentrations of organochlorine pollutants in mothers who gave birth to neonates with congenital hypothyroidism.<br><br>n/a (Fukuoka, Japan)  | Case-control<br><br>2 years (2002–2004) | 124 (22 cretinism cases, 102 normal controls)<br><br>M, F<br><br>Aged at outcome assessment: 5-20 days<br><br>2001–2004 | 17 PCDD/Fs, 12 DL-PCBs<br><br>Human milk (approx 4 weeks postpartum)<br><br>Not lipid adjusted | Mean (SD) in 34 human milk samples (pg WHO <sub>1998</sub> -TEQ/g whole weight)<br><br>Cretinism<br>0.62 (0.44)<br><br>Normal<br>0.28 (0.15) | <b>Incidence of cretinism</b><br><br>Significantly lower TEQ levels in breast milk of mothers who had normal children versus those whose children were diagnosed with cretinism.<br><br>Risk of bias tier: 1 |
| <b>Wilhelm et al. (2008).</b> The Duisburg birth cohort study: Influence of the prenatal exposure to PCDD/Fs and dioxin-like PCBs on thyroid                                      | Cross-sectional<br><br>2 years (2000–   | 80 (maternal serum), 60 (human milk) newborns                                                                           | 17 PCDD/Fs, 12 DL-PCBs<br><br>Maternal blood (serum), human milk                               | Median (min, max) (pg WHO <sub>2005</sub> -TEQ/g fat)<br><br>Blood (serum):<br>19.3 (3.77, 58.36)                                            | <b>TSH, T4, free T4, T3, free T3</b><br><br>No significant associations with exposure<br><br>Risk of bias tier: 1                                                                                            |

| Reference<br>Trial or Study name<br>(geography)                                                                                                          | Study type<br>Duration                      | Participants in the study<br>Sex (M/F)<br>Age at outcome assessment (years)<br>Year of tissue sampling                                                                                                | Compounds<br>Measurement of exposure                                     | Levels of exposure                                                                                                                                                                                                                                                                                                       | Parameters measured and Measures of effect<br>Risk of bias tier                                                                                                                                                                                                                                                                                                                         |
|----------------------------------------------------------------------------------------------------------------------------------------------------------|---------------------------------------------|-------------------------------------------------------------------------------------------------------------------------------------------------------------------------------------------------------|--------------------------------------------------------------------------|--------------------------------------------------------------------------------------------------------------------------------------------------------------------------------------------------------------------------------------------------------------------------------------------------------------------------|-----------------------------------------------------------------------------------------------------------------------------------------------------------------------------------------------------------------------------------------------------------------------------------------------------------------------------------------------------------------------------------------|
| hormone status in newborns and neurodevelopment of infants until the age of 24 months<br><br>Duisburg Cohort (Duisburg, Germany)                         | 2002)                                       | M, F<br><br>Age at outcome assessment: mothers: 32.1, infants: after birth.<br><br>2002–2004                                                                                                          | Lipid adjusted                                                           | Human milk:<br>19.67 (2.62, 52.37)                                                                                                                                                                                                                                                                                       | <i>Comments:</i> Low power.                                                                                                                                                                                                                                                                                                                                                             |
| <b>Baccarelli et al. (2008).</b><br>Neonatal thyroid function in Seveso 25 years after maternal exposure to dioxin.<br><br>Seveso Cohort (Seveso, Italy) | Ecological, Cross-sectional<br><br>25 years | 1,014 in the residence based (ecological) study<br><br>51 in the maternal blood sub-study<br><br>M, F<br><br>Age at outcome assessment: newborns (1994–2005) to mothers from 3 zones<br><br>1992–1998 | TCDD, 17 PCDD/Fs, 12 DL-PCBs<br><br>Blood (plasma)<br><br>Lipid adjusted | Median<br>1977–1978: 447(A), 94(B)<br>1993–1995: 61(A), 18(B), 6 (Reference)<br><br>Mean (95% CI)<br>(pg WHO <sub>2005</sub> -TEQ/g fat)<br><u>b-TSH ≤ 5 µU/mL:</u><br>TCDD: 5.2 (4.1–6.7)<br>Total WHO-TEQ: 29.2 (25.7–33.5)<br><br><u>b-TSH ≥ 5 µU/mL:</u><br>TCDD: 39.0 (8.9–173)<br>Total WHO-TEQ: 84.5 (16.7–427.8) | <b>TSH</b><br><br>Ecological/Residence based study: higher TSH in children born by mothers from zones A and B.<br><br>Maternal blood sub-study: significant association between TCDD and TSH in the plasma sub-study ( $\beta=0.47$ , $p<0.001$ ).<br><br>Risk of bias tier: 1<br><br><i>Comments:</i> Strong findings in the residence based study. Sub-study findings more uncertain. |
| <b>Han et al. (2011).</b><br>Correlations of PCBs, dioxin, and PBDE with TSH in                                                                          | Cross-sectional                             | 369 children from an e-waste area (195 exposed and                                                                                                                                                    | 17 PCDD/Fs, 12 DL-PCBs                                                   | Mean (SD) PCDD/Fs (ng/g fat):                                                                                                                                                                                                                                                                                            | <b>TSH</b><br><br>Higher in the control area (aluminium                                                                                                                                                                                                                                                                                                                                 |

| Reference<br>Trial or Study name<br>(geography)                                                                                               | Study type<br>Duration                                   | Participants in the study<br>Sex (M/F)<br>Age at outcome assessment (years)<br>Year of tissue sampling             | Compounds<br>Measurement of exposure                                                                                | Levels of exposure                                                                                                                                                                          | Parameters measured and Measures of effect<br>Risk of bias tier                                                                                                                                                                                                                                                                              |
|-----------------------------------------------------------------------------------------------------------------------------------------------|----------------------------------------------------------|--------------------------------------------------------------------------------------------------------------------|---------------------------------------------------------------------------------------------------------------------|---------------------------------------------------------------------------------------------------------------------------------------------------------------------------------------------|----------------------------------------------------------------------------------------------------------------------------------------------------------------------------------------------------------------------------------------------------------------------------------------------------------------------------------------------|
| Children's Blood in Areas of Computer E-waste Recycling<br><br>n/a (China, Luqiao (E-waste recycling area), Longyou (control))                | n/a                                                      | 174 controls<br><br>M, F<br><br>Age at outcome assessment: 6-8 years.<br><br>Year of tissue sampling: not reported | Blood (serum)<br><br>Lipid adjusted                                                                                 | Exposed E-waste area:<br>26.00 (19.58)<br><br>Control:<br>39.64 (31.86)                                                                                                                     | smelter).<br><br>Weak negative correlation with PCDD/Fs in Luqiao ( $r=-0.15$ ) but positive correlation in Longyou ( $r=0.64$ ).<br><br>PCBs had strong positive correlation with TSH in Luqiao ( $r=0.61$ ) and Longyou ( $r=0.75$ ).<br><br>Risk of bias tier: 2<br><br><i>Comments:</i> No TEQs. No good control group. Non informative. |
| <b>Leijs et al. (2012).</b> Thyroid hormone metabolism and environmental chemical exposure.<br><br>Amsterdam/Zaandam Cohort (The Netherlands) | Longitudinal<br><br>Children followed-up for 14–19 years | 29 adolescents<br><br>M, F<br><br>Age at outcome assessment: 14–19 years<br><br>1987–1991                          | 17 PCDD/Fs, 3 DL-PCBs (-77, -126, -169)<br><br>Human milk (perinatal exposure), blood (serum)<br><br>Lipid adjusted | Mean (range)<br><br>Human milk:<br>(pg I-TEQ/g fat)<br>32.6 (9.05-88.8)<br><br>Serum (current):<br>(pg WHO <sub>2005</sub> -TEQ/g fat)<br>PCDD/Fs: 2.2 (0.4–6.1)<br>DL-PCBs: 2.2 (0.04–7.8) | <b>TSH, T4, free T4, T3, TBG</b><br><br>No associations for total TEQ.<br><br>Risk of bias tier: 2<br><br><i>Comments:</i> Small study. Non informative                                                                                                                                                                                      |
| <b>Croes et al. (2014).</b> Monitoring chlorinated persistent organic pollutants in adolescents in Flanders                                   | Cross-sectional                                          | 200<br><br>M, F<br><br>Age at outcome                                                                              | CALUX determined BEQ levels<br><br>Blood serum                                                                      | Geometric mean<br>(pg BEQ/g fat)<br><br>PCDD/Fs:<br>108 (101, 114)                                                                                                                          | <b>T3, T4, TSH</b><br><br>DL-PCB- and PCDD/F-BEQs positively correlated with free T4.                                                                                                                                                                                                                                                        |

| Reference<br>Trial or Study name<br>(geography)                                                                                                                                                                                     | Study type<br>Duration     | Participants in the study<br>Sex (M/F)<br>Age at outcome assessment (years)<br>Year of tissue sampling | Compounds<br>Measurement of exposure                              | Levels of exposure                                                                                                                                                                                                                                   | Parameters measured and Measures of effect<br>Risk of bias tier                                                                                                      |
|-------------------------------------------------------------------------------------------------------------------------------------------------------------------------------------------------------------------------------------|----------------------------|--------------------------------------------------------------------------------------------------------|-------------------------------------------------------------------|------------------------------------------------------------------------------------------------------------------------------------------------------------------------------------------------------------------------------------------------------|----------------------------------------------------------------------------------------------------------------------------------------------------------------------|
| (Belgium): Concentrations, trends and dose-effect relationships (FLEHS II).<br><br>Flemish Environment and Health Study FLEHS II (Belgium, Hotspots: Genk-Zuid and Menen)                                                           |                            | assessment: 13.6–17.0<br><br>2008–2011                                                                 | Lipid adjusted                                                    | DL-PCBs:<br>32.1 (30.1, 34.2)                                                                                                                                                                                                                        | TSH negative correlation with PCDD/Fs ( $p = 0.02$ after Ln transformation).<br><br>No significant relationships with free T3.<br><br>Risk of bias tier: 2           |
| <b>Xu et al. (2014)</b> . Association of PCB, PBDE and PCDD/F body burdens with hormone levels for children in an e-waste dismantling area of Zhejiang Province, China.<br><br>n/a (China, Luqiao (exposure) and Tiantai (control)) | Cross-sectional<br><br>n/a | 45<br><br>M, F<br><br>Age at outcome assessment: 8<br><br>Year of tissue sampling: not reported        | 17 PCDD/Fs, 12 DL-PCBs<br><br>Blood (serum)<br><br>Lipid adjusted | Median, Mean (SD), (pg WHO <sub>2005</sub> -TEQ/g fat)<br><br><u>PCDD/Fs</u><br>Exposed:<br>155.20, 206.17 (156.68)<br>Control:<br>139.20, 160.27 (102.09)<br><br><u>DL-PCBs</u><br>Exposed:<br>16.07, 16.02 (3.32)<br>Control:<br>5.86, 6.68 (3.05) | <b>Free T3, Total T3, free T4, total T4, TSH</b><br><br>No associations were found between PCDD/F or DL-PCB levels and thyroid hormones.<br><br>Risk of bias tier: 1 |
| <b>Su et al. (2015)</b> . Thyroid and growth hormone concentrations in 8-year-old children exposed <i>in utero</i> to dioxins and polychlorinated biphenyls.<br><br>Part of a prospective study of                                  | Cohort<br><br>2000–2009    | 56 (23 males, 33 females)<br><br>M, F<br><br>Age at outcome assessment: 8                              | 17 PCDD/Fs, 12 DL-PCBs<br><br>Placenta<br><br>Lipid adjusted      | (pg WHO <sub>1998</sub> -TEQ/g fat)<br><br>Mean (SD)<br>15.41 (5.5)<br><br>Median (Min – Max)<br>14.83 (6.75 – 29.07)                                                                                                                                | <b>T3, T4, free T4, TSH, TBG</b><br><br>No consistent associations with T3, T4, free T4, TSH and TBG.<br><br>Risk of bias tier: 2                                    |

| Reference                                        | Study type | Participants in the study         | Compounds               | Levels of exposure       | Parameters measured and Measures of effect |
|--------------------------------------------------|------------|-----------------------------------|-------------------------|--------------------------|--------------------------------------------|
| Trial or Study name (geography)                  | Duration   | Sex (M/F)                         | Measurement of exposure |                          | Risk of bias tier                          |
|                                                  |            | Age at outcome assessment (years) |                         |                          |                                            |
|                                                  |            | Year of tissue sampling           |                         |                          |                                            |
| dioxins/PCBs for the general population (Taiwan) |            | 2009                              |                         | 'High' group:<br>≥ 14.83 |                                            |

TSH: thyroid stimulating hormone; TBG: thyroxin-binding globuline; n/a: not applicable.



### A.8.5. Studies on type 2 diabetes and obesity

**Table 69.** Epidemiological studies on the association between exposure to PCDD/Fs and DL-PCBs and **diabetes and obesity**. Details about the risk of bias appraisal can be found in **Annex A.9.5**.

| Reference<br>Trial or Study name<br>(Geography)                                                                                                                                                                                                                            | Study type<br>Duration     | Participants in the study<br>Sex<br>Age at outcome assessment (years)<br>Year of tissue sampling                                                                                            | Compounds<br>Measurement of exposure            | Levels of exposure                                                                                                                                                                                                                                                                                                                                                                                                                                                    | Parameters measured and Measures of effect<br>Risk of bias tier                                                                                                                                                                                                                                                                                                                                                                                                                                                                                                                                                                                                                                                 |
|----------------------------------------------------------------------------------------------------------------------------------------------------------------------------------------------------------------------------------------------------------------------------|----------------------------|---------------------------------------------------------------------------------------------------------------------------------------------------------------------------------------------|-------------------------------------------------|-----------------------------------------------------------------------------------------------------------------------------------------------------------------------------------------------------------------------------------------------------------------------------------------------------------------------------------------------------------------------------------------------------------------------------------------------------------------------|-----------------------------------------------------------------------------------------------------------------------------------------------------------------------------------------------------------------------------------------------------------------------------------------------------------------------------------------------------------------------------------------------------------------------------------------------------------------------------------------------------------------------------------------------------------------------------------------------------------------------------------------------------------------------------------------------------------------|
| <b>Michalek et al. (1999a).</b><br>Serum dioxin, insulin, fasting glucose, and sex hormone-binding globulin in veterans of operation Ranch Hand.<br><br>Air Force Health Study (AFHS, Operation Ranch Hand) (US Veterans that served in Southeast Asia during Vietnam War) | Cohort<br><br>11–22 years  | 1,992<br><br>M<br><br>Mean (SD) age at outcome assessment:<br><br>Comparison:<br>53.4 (7.4)<br>Background:<br>54.3 (6.9)<br>'Low':<br>55.0 (7.4)<br>'High':<br>50.9 (7.2)<br><br>1987, 2002 | TCDD<br><br>Blood (serum)<br><br>Lipid adjusted | Median (range) in 1987 and 2002 (pg/g fat):<br><br><u>Comparison</u> (n = 1,121):<br>3.9 (0–10)<br><u>Background</u> (n = 376):<br>5.7 (0–10)<br><u>'Low'</u> (n = 247):<br>15.0 (10–26.6)<br><u>'High'</u> (n = 248):<br>45.8 (18–618.8)<br><br>Mean (range) extrapolated levels at the end of the last tour of duty in Vietnam (using a constant half-life of 8.7 years) (pg/g fat):<br><br><u>'Low'</u> : 52.8 (27.7–94.6)<br><u>'High'</u> : 195.3 (94.7–3,290.2) | <b>Insulin and fasting glucose</b><br><br>Among non-diabetic veterans:<br>- insulin significantly increased in 'High' TCDD category.<br>- relation between SHBG and insulin interacted significantly with TCDD category on log scale within strata defined by age and % body fat.<br><br>Among young ( $\leq 53$ years old), lean (% body fat $\leq 25\%$ ) non-diabetic veterans:<br>- slope relating log-SHBG and log-insulin significantly decreased in the 'High' category.<br><br><b>Sex hormone-binding globulin (SHBG):</b><br>Diabetic and Non-diabetic veterans: no significant differences with the comparison category with regard to the mean of the logarithm of SHBG.<br><br>Risk of bias tier: 2 |
| <b>Steenland et al. (1999).</b><br>Cancer, heart disease, and diabetes in workers exposed to                                                                                                                                                                               | Cohort<br><br>Around 15–57 | 3,538<br><br>M                                                                                                                                                                              | TCDD<br><br>Cumulative                          | Cumulative exposure scores were calculated for each production plant                                                                                                                                                                                                                                                                                                                                                                                                  | <b>Diabetes</b><br><br>Number of deaths: 26                                                                                                                                                                                                                                                                                                                                                                                                                                                                                                                                                                                                                                                                     |

| Reference<br>Trial or Study name<br>(Geography)                                                                                                                                                                                            | Study type<br>Duration | Participants in the study<br>Sex<br>Age at outcome assessment (years)<br>Year of tissue sampling           | Compounds<br>Measurement of exposure                                                    | Levels of exposure                                                                         | Parameters measured and Measures of effect<br>Risk of bias tier                                                                                                                                                                                                                                                                                                                                                                                                                                        |
|--------------------------------------------------------------------------------------------------------------------------------------------------------------------------------------------------------------------------------------------|------------------------|------------------------------------------------------------------------------------------------------------|-----------------------------------------------------------------------------------------|--------------------------------------------------------------------------------------------|--------------------------------------------------------------------------------------------------------------------------------------------------------------------------------------------------------------------------------------------------------------------------------------------------------------------------------------------------------------------------------------------------------------------------------------------------------------------------------------------------------|
| 2,3,7,8-tetrachlorodibenzo- <i>p</i> -dioxin<br>n/a (USA)                                                                                                                                                                                  | years                  | Age at outcome assessment: not reported.<br>Year of tissue sampling: unclear.                              | exposure scores based on Job Exposure Matrix, calibrated against serum TCDD in subgroup |                                                                                            | SMR (95% CI): 1.18 (0.77–1.73)<br>Risk of bias tier: 2                                                                                                                                                                                                                                                                                                                                                                                                                                                 |
| <b>Cranmer et al. (2000).</b><br>Exposure to 2,3,7,8-tetrachlorodibenzo- <i>p</i> -dioxin (TCDD) is associated with hyperinsulinemia and insulin resistance.<br>n/a (USA, Arkansas, Jacksonville (near the Vertac/Hercules Superfund site) | Cohort<br>20–33 years  | 69<br>M, F<br>TCDD <15 pg/g fat group: 51 (13.2)<br>TCDD >15 pg/g fat group: 55 (11.6)<br>1991, 1994, 1995 | TCDD<br>Blood<br>Lipid adjusted                                                         | Range (n = 69) (pg/g fat)<br>2–95<br>Highest decile: >15 (n=7)<br>Lower levels: <15 (n=62) | <b>Hyperinsulinemia and insulin resistance</b><br>OR (95% CI) for high insulin subjects with TCDD>15 pg/g fat (n=7) compared to subjects with TCDD<15 pg/g fat (n=62).<br>Fasting (insulin level >4.5 μIU/mL): 8.5 (1.49–49.4)<br>30 min (insulin level >177 μIU/mL): 7 (1.26–39.0)<br>60 min (insulin level >228 μIU/mL): 12 (2.23–70.1)<br>120 min (insulin level >97.7 μIU/mL): 56 (5.7–556)<br>Risk of bias tier: 2<br><i>Comments:</i> Small study with only 7 individuals in the highest decile. |
| <b>Longnecker and Michalek</b>                                                                                                                                                                                                             | Cross-                 | 1,197 (Comparison                                                                                          | TCDD                                                                                    | TCDD levels in 1987                                                                        | <b>Fasting serum glucose, post-challenge</b>                                                                                                                                                                                                                                                                                                                                                                                                                                                           |

| Reference<br>Trial or Study name<br>(Geography)                                                                                                                                                                                                                   | Study type<br>Duration                                                          | Participants in the study<br>Sex<br>Age at outcome assessment (years)<br>Year of tissue sampling                  | Compounds<br>Measurement of exposure                   | Levels of exposure                                                                                                                              | Parameters measured and Measures of effect<br>Risk of bias tier                                                                                                                                                                                                                                                                                                                                                                                                                                                                                                                                 |
|-------------------------------------------------------------------------------------------------------------------------------------------------------------------------------------------------------------------------------------------------------------------|---------------------------------------------------------------------------------|-------------------------------------------------------------------------------------------------------------------|--------------------------------------------------------|-------------------------------------------------------------------------------------------------------------------------------------------------|-------------------------------------------------------------------------------------------------------------------------------------------------------------------------------------------------------------------------------------------------------------------------------------------------------------------------------------------------------------------------------------------------------------------------------------------------------------------------------------------------------------------------------------------------------------------------------------------------|
| <p><b>(2000).</b> Serum dioxin level in relation to diabetes mellitus among Air Force veterans with background levels of exposure.</p> <p>Air Force Health Study (AFHS) (Operation Ranch Hand) (US Veterans that served in Southeast Asia during Vietnam War)</p> | <p>sectional</p> <p>n/a</p>                                                     | <p>veterans)</p> <p>M</p> <p>Median age at outcome assessment in 1995: 53</p> <p>1987, 1992, 1997</p>             | <p>Blood (serum)</p> <p>Lipid adjusted</p>             | <p>(pg/g fat)</p> <p>Median: 4.0</p> <p>Quartile 1: &lt; 2.8</p> <p>Quartile 2: &lt; 4</p> <p>Quartile 3: &lt; 5.2</p> <p>Quartile 4: ≥ 5.2</p> | <p><b>serum glucose and insulin</b></p> <p>Crude OR (95% CI) / Adjusted OR (95% CI) / Adjusted OR (95% CI) (in addition to the above, serum TGs)</p> <p><u>Quartile 1 (cases: 26, controls: 272)</u><br/>1 / 1 / 1</p> <p><u>Quartile 2 (cases: 25, controls: 280)</u><br/>0.93 (0.53–1.66) / 0.89 (0.48–1.63) / 0.91 (0.50–1.68)</p> <p><u>Quartile 3 (cases: 57, controls: 238)</u><br/>2.51 (1.53–4.11) / 1.88 (1.11–3.19) / 1.77 (1.04–3.02)</p> <p><u>Quartile 4 (cases: 61, controls: 238)</u><br/>2.68 (1.64–4.38) / 1.71 (1.00–2.91) / 1.56 (0.91–2.67)</p> <p>Risk of bias tier: 1</p> |
| <p><b>Steenland et al. (2001a).</b> Dioxin and diabetes mellitus: an analysis of the combined NIOSH and Ranch Hand data</p> <p>Air Force Health Study (AFHS, Operation Ranch Hand), NIOSH (USA)</p>                                                               | <p>Cross-sectional</p> <p>Ranch Hand: 16–25 years</p> <p>NIOSH: 35 years of</p> | <p><u>Ranch Hand:</u> 990 Ranch Hand veterans, 1,275 referents</p> <p><u>NIOSH:</u> 259 chemical workers, 227</p> | <p>TCDD</p> <p>Blood (serum)</p> <p>Lipid adjusted</p> | <p>Median (range) (pg/g fat)</p> <p><u>NIOSH (1987–1988) (n=259):</u> 75 (2–3,388)</p> <p><u>Ranch Hand (1987, 1992)</u></p>                    | <p><b>Diabetes mellitus</b></p> <p><u>Prevalence of diabetes:</u> Combined exposed groups did not differ from the combined non-exposed groups: OR (95% CI): 1.17 (0.92–1.48), with no evidence of heterogeneity of exposure effect between studies.</p>                                                                                                                                                                                                                                                                                                                                         |

| Reference<br>Trial or Study name<br>(Geography)                                                                                              | Study type<br>Duration     | Participants in the study<br>Sex<br>Age at outcome assessment (years)<br>Year of tissue sampling                                  | Compounds<br>Measurement of exposure                                   | Levels of exposure                                                                                                                                     | Parameters measured and Measures of effect<br>Risk of bias tier                                                                                                                                                                                                                                                                                                                                                                                                                                                                                                                                                                                                                     |
|----------------------------------------------------------------------------------------------------------------------------------------------|----------------------------|-----------------------------------------------------------------------------------------------------------------------------------|------------------------------------------------------------------------|--------------------------------------------------------------------------------------------------------------------------------------------------------|-------------------------------------------------------------------------------------------------------------------------------------------------------------------------------------------------------------------------------------------------------------------------------------------------------------------------------------------------------------------------------------------------------------------------------------------------------------------------------------------------------------------------------------------------------------------------------------------------------------------------------------------------------------------------------------|
|                                                                                                                                              | occupationally exposure    | referents<br>M<br>Mean age at outcome assessment:<br>Rand Hand: 53<br>NIOSH: 56<br><br>NIOSH: 1987–1988<br>Ranch Hand: 1987, 1992 |                                                                        | (n=990):<br>12 (0–618)<br><br><u>NIOSH referents</u> (assigned):<br>6.1 (2.0–19.7)<br><br><u>Ranch Hand Comparison</u> (>10 pg/g fat excluded):<br>4.0 | <u>Fasting serum glucose</u> : No difference between combined exposed and non-exposed groups in mean fasting serum glucose (difference in log serum glucose 0.002, 95% CI .0.006–0.010).<br><br>Little evidence in either study of a dose-response trend for fasting serum glucose.<br><br>Increasing trend (p=0.0001) in prevalence of diabetes with increased TCDD (at the time of examination or at time of last exposure) among the Ranch Hand subjects, with excess risk largely confined to the highest 8% of the exposed group (>78 pg/g fat) (3.21 (1.81–5.72) versus those with <10 pg/g fat. No positive dose-response in the NIOSH subjects.<br><br>Risk of bias tier: 1 |
| <b>Johnson et al. (2001).</b> Serum hormone levels in humans with low serum concentrations of 2,3,7,8-TCDD.<br><br>n/a (Australia, Victoria) | Cross-sectional<br><br>n/a | 32<br>M<br>Mean (range) age at sampling:<br>48 (29–76)<br><br>Year of tissue sampling: not clear.                                 | TCDD<br><br>Blood (serum)<br><br>No information about lipid adjustment | (pg/g) (n = 32)<br><br>TCDD < 20<br><br>Mean level: 2.6 – 8.1 pg/g                                                                                     | <b>Insulin glucagon</b><br><br>TCDD positively correlated with glucagon. No correlation with insulin.<br><br>Risk of bias tier: 2                                                                                                                                                                                                                                                                                                                                                                                                                                                                                                                                                   |

| Reference<br>Trial or Study name<br>(Geography)                                                                                                                                                                                                                                                                                         | Study type<br>Duration                        | Participants in the study<br>Sex<br>Age at outcome assessment (years)<br>Year of tissue sampling                                           | Compounds<br>Measurement of exposure                                                   | Levels of exposure                                                                                                                                                                                                                                                                                   | Parameters measured and Measures of effect<br>Risk of bias tier                                                                                                                                                                                                                                                                                                                      |
|-----------------------------------------------------------------------------------------------------------------------------------------------------------------------------------------------------------------------------------------------------------------------------------------------------------------------------------------|-----------------------------------------------|--------------------------------------------------------------------------------------------------------------------------------------------|----------------------------------------------------------------------------------------|------------------------------------------------------------------------------------------------------------------------------------------------------------------------------------------------------------------------------------------------------------------------------------------------------|--------------------------------------------------------------------------------------------------------------------------------------------------------------------------------------------------------------------------------------------------------------------------------------------------------------------------------------------------------------------------------------|
| <p><b>Fierens et al. (2003).</b> Dioxin / polychlorinated biphenyl body burden, diabetes and endometriosis: findings in a population-based study in Belgium.</p> <p>n/a (Belgium: Cockerill (iron and steel plant), Mont-Saint-Guibert (waste dumping site), Pont-de-Loup (MWSI), Thumaide (MWSI), Rural areas in Southern Belgium)</p> | <p>Cross-sectional</p> <p>1 year duration</p> | <p>257 (9 cases, 248 controls)</p> <p>M, F</p> <p>Age at outcome assessment:<br/>Cases: 56.0<br/>Controls: 51.5</p> <p>2000–2001</p>       | <p>17 PCDD/Fs, 4 DL-PCBs (-77, -81, -126, -169)</p> <p>Blood</p> <p>Lipid adjusted</p> | <p>Mean (pg WHO<sub>1998</sub>-TEQ/g fat)</p> <p><u>PCDD/Fs:</u><br/>Cases: 46.6 (34.7–62.5)<br/>Controls: 25.2 (23.6–26.8)</p> <p><u>DL-PCBs:</u><br/>Cases: 16.2 (9.47–27.7)<br/>Controls: 7.2 (6.65–7.73)</p> <p><u>Total TEQ:</u><br/>Cases: 64.2 (46.7–88.3)<br/>Controls: 32.8 (30.8–35.0)</p> | <p><b>Diabetes</b></p> <p>After adjustment for age and other covariates, serum total TEQs in diabetics were 62% (p=0.0005) and 39% (p=0.0067) higher, respectively, than in controls.</p> <p>Risk of diabetes significantly increased in subjects in the top decile:</p> <p>OR (95% CI):<br/>PCDD/Fs: 5.07 (1.18–21.7)<br/>DL-PCBs: 13.3 (3.31–53.2)</p> <p>Risk of bias tier: 2</p> |
| <p><b>Kern et al. (2004).</b> Insulin sensitivity following agent orange exposure in Vietnam veterans with high blood levels of 2,3,7,8-tetrachlorodibenzo-<i>p</i>-dioxin.</p> <p>Air Force Health Study (AFHS, Operation Ranch Hand) (US Veterans that served in</p>                                                                  | <p>Cross-sectional</p> <p>11–37 years</p>     | <p>58 (1997 study), 142 (2002 study)</p> <p>M</p> <p>Mean (SD) age at outcome assessment:<br/><u>1997 study:</u><br/>Cases: 56.6 (6.4)</p> | <p>TCDD</p> <p>Blood (serum)</p> <p>Lipi adjusted</p>                                  | <p>Mean (range) (pg/g fat)</p> <p><u>1997 study:</u><br/>Cases (n = 29): 45.3 (22.6–186)<br/>Comparison (n = 29): 3.6 (1.2–9.0)</p> <p><u>2002 study:</u></p>                                                                                                                                        | <p><b>Insulin sensitivity, quantitative insulin sensitivity check index (QUICKI)</b></p> <p>An 18-fold increase in blood TCDD resulted in a 10% change in insulin sensitivity in the 29 matched pairs.</p> <p>Risk of bias tier: 1</p>                                                                                                                                               |

| Reference<br>Trial or Study name<br>(Geography)                                                                                                                              | Study type<br>Duration                                    | Participants in the study<br>Sex<br>Age at outcome assessment (years)<br>Year of tissue sampling                                                                                                                                                      | Compounds<br>Measurement of exposure            | Levels of exposure                                                                                                           | Parameters measured and Measures of effect<br>Risk of bias tier                                                                                           |
|------------------------------------------------------------------------------------------------------------------------------------------------------------------------------|-----------------------------------------------------------|-------------------------------------------------------------------------------------------------------------------------------------------------------------------------------------------------------------------------------------------------------|-------------------------------------------------|------------------------------------------------------------------------------------------------------------------------------|-----------------------------------------------------------------------------------------------------------------------------------------------------------|
| Southeast Asia during Vietnam War)                                                                                                                                           |                                                           | Comp: 56.8 (6.1)<br>2002 study:<br>Cases: 57.6 (4.1)<br>Comp: 58.4 (4.6)<br><br>1987, 1992, 1997                                                                                                                                                      |                                                 | Cases (n = 71):<br>25.4 (10.3–58)<br>Comparison (n = 71):<br>3.7 (0.5–8.7)                                                   |                                                                                                                                                           |
| <b>Baccarelli et al. (2005).</b><br>Health status and plasma dioxin levels in chloracne cases 20 years after the Seveso, Italy accident.<br><br>Seveso study (Italy, Seveso) | Case control<br><br>17–22 years after the Seveso incident | 312 (101 chloracne cases, 211 controls)<br><br>M, F<br><br>Age at explosion:<br>Cases:<br>6 months–46 years<br>Controls:<br>3 months–48 years<br><br>Age at outcome assessment:<br>Cases: 17–22 years older than at time of exposure<br><br>1993–1998 | TCDD<br><br>Blood<br><br>Lipid adjusted         | (pg/g fat) (n = 293)<br><br>< 10 (n = 215)<br><br>> 10 (n = 78)                                                              | <b>Diabetes</b><br><br>Only one diabetes case among the chloracne cases and two among the controls.<br><br>Risk of bias tier: 2                           |
| <b>Michalek and Pavuk (2008).</b><br>Diabetes and cancer in veterans of Operation Ranch Hand after adjustment for calendar period, days of spraying, and time spent          | Cohort study<br><br>11–40 years                           | 2,583<br><br>M<br><br>Age at outcome                                                                                                                                                                                                                  | TCDD<br><br>Blood (serum)<br><br>Lipid adjusted | Median extrapolated levels at the end of the last tour of duty in Vietnam using a constant half-life of 7.6 years (pg/g fat) | <b>Diabetes</b><br><br>Associations between TCDD and diabetes stratified by calendar period of service, days of spraying, and the combination of calendar |

| Reference<br>Trial or Study name<br>(Geography)                                                                                              | Study type<br>Duration | Participants in the study<br>Sex<br>Age at outcome assessment (years)<br>Year of tissue sampling | Compounds<br>Measurement of exposure | Levels of exposure                                                                                                                                                                                                                          | Parameters measured and Measures of effect<br>Risk of bias tier                                                                                                                                                                                                                                                                                                                                                                                                                                                                                                                                                      |
|----------------------------------------------------------------------------------------------------------------------------------------------|------------------------|--------------------------------------------------------------------------------------------------|--------------------------------------|---------------------------------------------------------------------------------------------------------------------------------------------------------------------------------------------------------------------------------------------|----------------------------------------------------------------------------------------------------------------------------------------------------------------------------------------------------------------------------------------------------------------------------------------------------------------------------------------------------------------------------------------------------------------------------------------------------------------------------------------------------------------------------------------------------------------------------------------------------------------------|
| in Southeast Asia.<br><br>Air Force Health Study (AFHS, Operation Ranch Hand) (US Veterans that served in Southeast Asia during Vietnam War) |                        | assessment: not reported<br><br>1987, 1992, 1997, 2002                                           |                                      | <u>Vietnam service:</u><br>Comparisons: 4<br>Ranch Hand: 12.6<br><br><u>No Vietnam service:</u><br>Comparison: 3.9<br>Ranch Hand: 10.6<br><br><u>Days of spraying:</u><br>Comparison: 3.9<br>Ranch Hand:<br>≥90 days: 13.3<br><90 days: 5.9 | period of service and days of spraying, respectively.<br><br><u>Ranch Hand</u><br><br><b>High</b><br>Diabetic (%): 259 (17.9) 49 (11.0) 62 (21.7) 69 (24.0)<br>RR<br>0.86 1.45<br>1.68<br><u>Stratified by calendar period of service</u><br><b>≤1969</b><br>RR<br>1.26 1.87<br>1.97<br>95% CI<br>0.8–1.98 1.21–2.89<br>1.26–3.06<br><b>&gt;1969</b><br>RR<br>0.47 1.08<br>1.22<br>95% CI<br>0.23–0.93 0.63–1.85<br>0.67–2.24<br><u>Stratified by days of spraying</u><br><b>≥ 90 days</b><br>RR<br>0.97 1.45<br>1.58<br>95% CI<br>0.66–1.43 1.04–2.02<br>1.12–2.24<br><b>&lt;90 days</b><br>RR<br>0.59 0.73<br>0.35 |



| Reference                                                                                                                                                          | Study type                 | Participants in the study                                                                       | Compounds                                                         | Levels of exposure                                                                            | Parameters measured and Measures of effect                                                                                                                                                                                                                                                                                                                                                                            |
|--------------------------------------------------------------------------------------------------------------------------------------------------------------------|----------------------------|-------------------------------------------------------------------------------------------------|-------------------------------------------------------------------|-----------------------------------------------------------------------------------------------|-----------------------------------------------------------------------------------------------------------------------------------------------------------------------------------------------------------------------------------------------------------------------------------------------------------------------------------------------------------------------------------------------------------------------|
| Trial or Study name (Geography)                                                                                                                                    | Duration                   | Sex<br><br>Age at outcome assessment (years)<br><br>Year of tissue sampling                     | Measurement of exposure                                           |                                                                                               | Risk of bias tier                                                                                                                                                                                                                                                                                                                                                                                                     |
|                                                                                                                                                                    |                            |                                                                                                 |                                                                   |                                                                                               | 95% CI 0.26–1.32 0.17–3.05<br>0.05–2.65<br><u>Stratified by calendar period of service and days of spraying</u><br><b>≤1969 and ≥90 days</b><br>RR 1.37 1.99<br>2.12<br>95% CI 0.85–2.22 1.28–3.09<br>1.36–3.3<br><b>Complement</b> (Not during/ before 1969, ≥90 days of spraying)<br>RR 0.48 0.98<br>0.98<br>95% CI 0.26–0.87 0.58–1.67<br>0.54–1.79<br><br>Risk of bias tier: 2                                    |
| <b>Chen et al. (2008).</b><br>Relationship between insulin sensitivity and exposure to dioxins and polychlorinated biphenyls in pregnant women<br><br>n/a (Taiwan) | Cross sectional<br><br>n/a | 40<br><br>F<br><br>Mean (SD, range) age at outcome assessment: 28.21 (3.92, 21-39).<br><br>2004 | 17 PCDD/Fs, 12 DL-PCBs<br><br>Blood (serum)<br><br>Lipid adjusted | Mean (SD) Total-TEQs (pg WHO-TEQ/g fat):<br><br>14.91 (2.82)<br><br>* TEF scheme not reported | <b>Fasting serum insulin and glucose levels</b><br><br>PCB-123, -126, and -169 significantly correlated with insulin activity. However, except for 1234678-HpCDD, no PCDD or PCDF congener were correlated with the insulin, insulin sensitivity or QUICKI measures.<br><br>No significant correlations between concentration-based total-TEQ and insulin, insulin sensitivity or quicki.<br><br>Risk of bias tier: 2 |

| Reference<br>Trial or Study name<br>(Geography)                                                                                                                                          | Study type<br>Duration         | Participants in the study<br>Sex<br>Age at outcome assessment (years)<br>Year of tissue sampling | Compounds<br>Measurement of exposure                      | Levels of exposure                                                                                                                                                                                                | Parameters measured and Measures of effect<br>Risk of bias tier                                                                                                                                                                                                                                                                                                                                                                                                                                                   |
|------------------------------------------------------------------------------------------------------------------------------------------------------------------------------------------|--------------------------------|--------------------------------------------------------------------------------------------------|-----------------------------------------------------------|-------------------------------------------------------------------------------------------------------------------------------------------------------------------------------------------------------------------|-------------------------------------------------------------------------------------------------------------------------------------------------------------------------------------------------------------------------------------------------------------------------------------------------------------------------------------------------------------------------------------------------------------------------------------------------------------------------------------------------------------------|
| <b>Uemura et al. (2008).</b><br>Associations of environmental exposure to dioxins with prevalent diabetes among general inhabitants in Japan.<br><br>n/a (Japan)                         | Cross sectional<br><br>4 years | 1,374<br><br>M, F<br><br>Age range at outcome assessment: 15-73<br><br>2002–2006                 | 17 PCDD/Fs, 12 DL-PCBs<br><br>Blood<br><br>Lipid adjusted | Mean, Median (25%, 75%) (pg WHO <sub>1998</sub> -TEQ/g fat):<br><br>Total TEQs:<br>24.08, 20.00 (12.00, 31.00)<br><br>PCDD/F-TEQs:<br>13.96, 12.00 (7.70, 18.00)<br><br>DL-PCB-TEQs:<br>10.15, 7.60 (4.40, 13.00) | <b>Prevalent diabetes</b><br><br><u>&lt;20.00 pg WHO<sub>1998</sub>-TEQ/g fat (reference category)</u><br>Cases/total: 9/666<br><br><u>≥20.00 and &lt;31.00 pg WHO<sub>1998</sub>-TEQ/g fat</u><br>Cases/total: 17/353<br>Non-adjusted OR (95% CI): 3.69 (1.67–8.75)<br>Adjusted OR (95% CI): 2.10 (0.87–5.39)<br><br><u>≥31.00 pg WHO<sub>1998</sub>-TEQ/g fat</u><br>Cases/total: 39/355<br>Non-adjusted OR (95% CI): 39 9.01 (4.51–20.0)<br>Adjusted OR (95% CI): 3.81 (1.56–10.1)<br><br>Risk of bias tier: 1 |
| <b>Uemura et al. (2009).</b><br>Prevalence of metabolic syndrome associated with body burden levels of dioxin and related compounds among Japan's general population.<br><br>n/a (Japan) | Cross-sectional<br><br>4 years | 1,374<br><br>M, F<br><br>Age (range) at outcome assessment: 15-73 years<br><br>2002–2006         | 17 PCDD/Fs, 12 DL-PCBs<br><br>Blood<br><br>Lipid adjusted | Median (25, 75%) (pg WHO <sub>1998</sub> -TEQ/g fat)<br><br>Total TEQs:<br>20 (12, 31)<br><br>PCDD/F-TEQs:<br>12 (7.7–18)<br><br>DL-PCB-TEQs:<br>7.6 (4.4–13)                                                     | <b>Metabolic syndrome (BMI, serum triglycerides, serum HDL, systolic blood pressure, diastolic blood pressure, HbA1c)</b><br><br><u>&lt;12.00 pg WHO<sub>1998</sub>-TEQ/g fat (reference category)</u><br>Cases/total: 10/303<br><br><u>≥20.00 and &lt;19.00 pg WHO<sub>1998</sub>-TEQ/g fat</u><br>Cases/total: 22/318<br>Non-adjusted OR (95 % CI): 2.2 (1.0–4.9)                                                                                                                                               |

| Reference<br>Trial or Study name<br>(Geography)                                                                                                             | Study type<br>Duration              | Participants in<br>the study<br>Sex<br>Age at outcome<br>assessment<br>(years)<br>Year of tissue<br>sampling                | Compounds<br>Measurement<br>of exposure         | Levels of exposure                                                                                                                       | Parameters measured and Measures of<br>effect<br>Risk of bias tier                                                                                                                                                                                                                                                                                                                                                           |
|-------------------------------------------------------------------------------------------------------------------------------------------------------------|-------------------------------------|-----------------------------------------------------------------------------------------------------------------------------|-------------------------------------------------|------------------------------------------------------------------------------------------------------------------------------------------|------------------------------------------------------------------------------------------------------------------------------------------------------------------------------------------------------------------------------------------------------------------------------------------------------------------------------------------------------------------------------------------------------------------------------|
|                                                                                                                                                             |                                     |                                                                                                                             |                                                 |                                                                                                                                          | Adjusted OR (95% CI): 2.2 (0.98–5.0)<br><br><u>≥19.00 and &lt;30.00 pg WHO<sub>1998</sub>-TEQ/g fat</u><br>Cases/total: 35/345<br>Non-adjusted OR (95% CI): 3.3 (1.7–7.2)<br>Adjusted OR (95%CI): 3.2 (1.4–7.6)<br><br><u>≥30.00 pg WHO<sub>1998</sub>-TEQ/g fat</u><br>Cases/total: 55/343<br>Non-adjusted OR (95% CI): 5.6 (2.9–12)<br>Adjusted OR (95% CI): 5.1 (2.1–13)<br>p for trend <0.01<br><br>Risk of bias tier: 2 |
| <b>Pelclova et al. (2009).</b><br>Chronic health impairment due<br>to 2,3,7,8-tetrachloro-dibenzo- <i>p</i> -<br>dioxin exposure.<br><br>n/a (Not reported) | Cross-<br>sectional<br><br>44 years | 11<br><br>M<br><br>Exposure between<br>1965 and 1968<br><br>Age (SD) at<br>outcome<br>assessment:<br>64.4 (1.5)<br><br>2008 | TCDD<br><br>Blood (serum)<br><br>Lipid adjusted | Mean (SD, range)<br>(pg/g fat)<br><br>274.0 (181.2, 53–756)                                                                              | <b>Diabetes type 2</b><br><br>The proportion of diabetes type 2 was 55%.<br><br>Risk of bias tier: 2                                                                                                                                                                                                                                                                                                                         |
| <b>Burns et al. (2011).</b> Serum<br>dioxins and polychlorinated<br>biphenyls are associated with                                                           | Cohort<br><br>3 years               | 473<br><br>Age (range) at                                                                                                   | 17 PCDD/Fs, DL-<br>PCBs and NDL-<br>PCBs        | Median (25 <sup>th</sup> - 75 <sup>th</sup> percentile)<br>sum PCDD/Fs and non- <i>ortho</i><br>PCBs (pg WHO <sub>2005</sub> -TEQ/g fat) | <b>BMI, height, height velocity</b><br><br>Boys in highest TEQ exposure quintile had a                                                                                                                                                                                                                                                                                                                                       |

| Reference<br>Trial or Study name<br>(Geography)                                                                                                                                                                                                                                                     | Study type<br>Duration         | Participants in the study<br>Sex<br>Age at outcome assessment (years)<br>Year of tissue sampling | Compounds<br>Measurement of exposure    | Levels of exposure                     | Parameters measured and Measures of effect<br>Risk of bias tier                                                                                                                                                                                                                                                                                                                                                                                                                                         |
|-----------------------------------------------------------------------------------------------------------------------------------------------------------------------------------------------------------------------------------------------------------------------------------------------------|--------------------------------|--------------------------------------------------------------------------------------------------|-----------------------------------------|----------------------------------------|---------------------------------------------------------------------------------------------------------------------------------------------------------------------------------------------------------------------------------------------------------------------------------------------------------------------------------------------------------------------------------------------------------------------------------------------------------------------------------------------------------|
| growth among Russian boys.<br>Russian Children's Study<br>(Russia, Chapaevsk)                                                                                                                                                                                                                       |                                | enrolment: 8–9<br>2003–2005                                                                      | Blood serum<br>Lipid adjusted           | (n=468):<br>21.1 (14.4, 33.2)          | significant decrease in mean BMI z-scores of 0.67 compared with boys in the lowest quintile. For PCB <sup>1</sup> exposure, the BMI z-score reduction was 1,04.<br><br>PCDD/Fs-and DL-PCB TEQ was not significantly associated with height z scores or height velocity<br><br>Higher serum PCB concentrations at age 8-9 were associated with significantly lower height z scores (mean decrease 0.41) and height velocity (mean decrease 0.19 cm/year) after 3 years.<br><br>Risk of bias tier: Tier 1 |
| <b>Yi et al. (2013).</b> Serum 2,3,7,8-tetrachlorodibenzo- <i>p</i> -dioxin levels and their association with age, body mass index, smoking, military record-based variables, and estimated exposure to Agent Orange in Korean Vietnam veterans.<br><br>Korean Veterans Health Study (KVHS) (Korea) | Cross-sectional<br>30-40 years | 105<br>M<br>Average age at outcome assessment in 2001: 56.5 (3.7)<br>2001                        | TCDD<br>Blood (serum)<br>Lipid adjusted | pg/g fat<br>Mean: 1.2<br>Median 0.9    | <b>BMI</b><br><br>No significant relationships between serum TCDD concentration, and age, BMI, and smoking in the Korean Vietnam veterans studied.<br><br>Risk of bias tier: 2                                                                                                                                                                                                                                                                                                                          |
| <b>Warner et al. (2013).</b> Diabetes, Metabolic Syndrome, and Obesity in Relation to                                                                                                                                                                                                               | Cohort<br>32 years             | 833<br>F                                                                                         | TCDD<br>Blood (serum)                   | Median (IQR) pg/g fat<br>55.9 (28–157) | <b>Metabolic syndrome, waist circumference, triglycerides, HDL-C, blood pressure, glucose</b>                                                                                                                                                                                                                                                                                                                                                                                                           |

| Reference<br>Trial or Study name<br>(Geography)                                                                                                                                        | Study type<br>Duration                | Participants in the study<br>Sex<br>Age at outcome assessment (years)<br>Year of tissue sampling | Compounds<br>Measurement of exposure                                                                | Levels of exposure                                                                                                                                                                        | Parameters measured and Measures of effect<br>Risk of bias tier                                                                                                                                                                                                                                                                                                                                                      |
|----------------------------------------------------------------------------------------------------------------------------------------------------------------------------------------|---------------------------------------|--------------------------------------------------------------------------------------------------|-----------------------------------------------------------------------------------------------------|-------------------------------------------------------------------------------------------------------------------------------------------------------------------------------------------|----------------------------------------------------------------------------------------------------------------------------------------------------------------------------------------------------------------------------------------------------------------------------------------------------------------------------------------------------------------------------------------------------------------------|
| Serum Dioxin Concentrations: The Seveso Women's Health Study.<br><br>Seveso Women's Health Study (SWHS) (Italy, Seveso)                                                                |                                       | Average (SD) age at outcome assessment: 54.9 (9.4)<br><br>1976                                   | Lipid adjusted                                                                                      | Geometric mean (SD)<br>Subjects with diabetes: 7.9 (3.9)<br><br>Non-cases: 71.1 (4.2)                                                                                                     | 10-fold increase in serum TCDD ( $\log_{10}$ TCDD) not associated with:<br>Diabetes: Adj HR (95% CI)=0.76 (0.45-1.28)<br>Obesity: Adj OR (95% CI)=0.80 (0.58-1.10)<br>Metabolic syndrome: Adj OR (95% CI)=1.05 (0.78-1.43)<br><br>However, TCDD associated with metabolic syndrome among women $\leq 12$ -years of age at time of explosion:<br>Adjusted OR (95% CI) = 2.03 (1.25-3.29).<br><br>Risk of bias tier: 1 |
| <b>Delvaux et al. (2014).</b><br>Prenatal exposure to environmental contaminants and body composition at age 7-9 years<br><br>Flemish Environment and Health Study (FLEHS I) (Belgium) | Cohort study<br><br>9 years follow-up | 114<br><br>M, F<br><br>Mean (SD) age at outcome assessment: 8.43 (0.43)<br><br>2011              | CALUX determined BEQ levels<br><br>Cord blood (plasma)<br><br>No information whether lipid adjusted | Median (P25, P75) (pg BEQs/L)<br><br>Participants:<br>Boys: 0.05 (0.02, 0.08)<br>Girls: 0.04 (0.02, 0.06)<br>Total: 0.05 (0.02, 0.07)<br><br>Non-participants<br>Total: 0.05 (0.02, 0.07) | <b>Anthropometric parameters (height, weight, BMI, sum of four skinfolds), waist circumference and waist/height ratio)</b><br><br>No significant associations found for pre-natal CALUX-BEQs after adjustment for confounders/covariates.<br><br>Risk of bias tier: 2                                                                                                                                                |
| <b>Iszatt et al. (2016).</b> Perinatal exposure to dioxins and dioxin-like compounds and infant growth and body mass index at                                                          | Cohort                                | 96 (FLEHS I), 207 (Slovak PCB), 64 (HUMIS)                                                       | CALUX determined BEQ levels                                                                         | Mean (SD) (pg BEQ/g fat)<br><br>FLEHS I (n=96):                                                                                                                                           | <b>Postnatal growth</b><br><br>Perinatal BEQ exposure associated with increased growth between 0 and 24 months ( $\beta$ )                                                                                                                                                                                                                                                                                           |

| Reference<br>Trial or Study name<br>(Geography)                                                                                                                                                              | Study type<br>Duration              | Participants in the study<br>Sex<br>Age at outcome assessment (years)<br>Year of tissue sampling                 | Compounds<br>Measurement of exposure                                                             | Levels of exposure                                                                                                                                                                          | Parameters measured and Measures of effect<br>Risk of bias tier                                                                                                                                                                                                                                                                                                                                                                                                                                |
|--------------------------------------------------------------------------------------------------------------------------------------------------------------------------------------------------------------|-------------------------------------|------------------------------------------------------------------------------------------------------------------|--------------------------------------------------------------------------------------------------|---------------------------------------------------------------------------------------------------------------------------------------------------------------------------------------------|------------------------------------------------------------------------------------------------------------------------------------------------------------------------------------------------------------------------------------------------------------------------------------------------------------------------------------------------------------------------------------------------------------------------------------------------------------------------------------------------|
| seven years: a pooled analysis of three European birth cohorts.<br><br>HUMIS (Norway), FLEHS I (Belgium), Slovak PCB cohort (Slovakia)                                                                       |                                     | M, F<br><br>Age at outcome assessment: 24 months<br><br>FLEHS I, Slovak PCB:<br>2002-2004<br>HUMIS:<br>2002-2009 | Human milk (HUMIS, Slovak PCB), cord serum (FLEHS I)<br><br>Lipid adjusted                       | 31.2 (19.2)<br><br>HUMIS (n=64):<br>7.9 (2.6)<br><br>Slovak PCB (n=207):<br>15.5 (9.5)                                                                                                      | = 0.07, 95% CI: -0.01, 0.14).<br><br>At 7 years, exposure was associated with a statistically significant increase in BMI in girls ( $\beta = 0.49$ , 95% CI: 0.07, 0.91) but not in boys ( $\beta = -0.03$ , 95% CI: -0.55, 0.49) (p-interaction = 0.044).<br><br>Girls had a 54% (-6%, 151%) increased risk of overweight at 7 years (p-interaction = 0.023).<br><br>Risk of bias tier: 2                                                                                                    |
| <b>Leijs et al. (2017).</b><br>Alternations in the programming of energy metabolism in adolescents with background exposure to dioxins, dl-PCBs and PBDEs.<br><br>Amsterdam/Zaandam Cohort (The Netherlands) | Cohort<br><br>14–19 years follow-up | 33<br><br>M, F<br><br>Age at assessment: 14–19 years<br><br>1987–1991,<br>2005/2006                              | 17 PCDD/Fs, 3 DL-PCBs (PCB-77, -126, -169)<br><br>Human milk (perinatal exposure), blood (serum) | Mean (range)<br><br>Human milk:<br>(pg I-TEQ/g fat)<br>32.6 (9.05–88.8)<br><br>Serum (current):<br>(pg WHO <sub>2005</sub> -TEQ/g fat)<br>PCDD/Fs: 2.2 (0.4–6.1)<br>DL-PCBs: 2.2 (0.04–7.8) | <b>Fasting glucose, insulin, HbA1c, leptin</b><br><br>Prenatal PCDD/F exposure positively correlated to the glucose:insulin ratio (p=0.024), and negatively correlated to the fasting insulin concentration (p=0.017).<br><br>Postnatal lactational PCDD/F intake negatively correlated to fasting insulin concentration (p=0.028).<br><br>Current serum levels of PCDD/Fs and total TEQ positively correlated to the fasting serum glucose concentration (p=0.015 and p=0.037, respectively). |

| Reference                       | Study type | Participants in the study         | Compounds               | Levels of exposure | Parameters measured and Measures of effect |
|---------------------------------|------------|-----------------------------------|-------------------------|--------------------|--------------------------------------------|
| Trial or Study name (Geography) | Duration   | Sex                               | Measurement of exposure |                    | Risk of bias tier                          |
|                                 |            | Age at outcome assessment (years) |                         |                    |                                            |
|                                 |            | Year of tissue sampling           |                         |                    |                                            |
|                                 |            |                                   |                         |                    | Risk of bias tier: 2                       |

MSWI: Municipal solid waste incinerator.



### A.8.6. Studies on cardiovascular effects

**Table 70.** Epidemiological studies on the association between exposure to PCDD/Fs and DL-PCBs and **cardiovascular effects**. Details about the risk of bias appraisal can be found in **Annex A.9.6**.

| Reference<br><br>Trial or Study name<br>(geography)                                                                                                                                                        | Study type<br><br>Duration                     | Participants in the study<br><br>Sex (M/F)<br><br>Age at outcome assessment (years)<br><br>Year of tissue sampling                                                                                         | Compounds<br><br>Measurement of exposure                             | Levels of exposure                                                                                         | Parameters measured and Measures of effect<br><br>Risk of bias tier                                                                                                                            |
|------------------------------------------------------------------------------------------------------------------------------------------------------------------------------------------------------------|------------------------------------------------|------------------------------------------------------------------------------------------------------------------------------------------------------------------------------------------------------------|----------------------------------------------------------------------|------------------------------------------------------------------------------------------------------------|------------------------------------------------------------------------------------------------------------------------------------------------------------------------------------------------|
| <b>Calvert et al. (1998).</b><br>Evaluation of cardiovascular outcomes among US workers exposed to 2,3,7,8-tetrachlorodibenzo- <i>p</i> -dioxin.<br><br>n/a (USA, New Jersey, Newark and Missouri, Verona) | Cross sectional<br><br>15 years after exposure | 541 (281 workers from two TCP plants, 260 referents from the area)<br><br>M (mostly), F<br><br>Age (SD) at outcome assessment:<br>Referents: 56 (10.5) years<br>All workers: 55.4 (10.3) years<br><br>1987 | TCDD<br><br>Blood (serum)<br><br>Lipid adjusted                      | Mean (SD) (pg/g fat)<br><br>All workers: 220 (434)<br><br>Referents: 7 (2)<br><br>Back-extrapolated: 1,900 | <b>Various cardiovascular diseases (e.g. heart disease, hypertension)</b><br><br>No significant association with TCDD exposure.<br><br>Risk of bias tier: 1<br><br><i>Comments:</i> Low power. |
| <b>Pesatori et al. (1998).</b> Dioxin exposure and non-malignant health effects: a mortality study.<br><br>Seveso study (Italy, Seveso)                                                                    | Cohort<br><br>15 years                         | About 45 000 in three zones<br><br>M, F<br><br>Age at outcome assessment: all                                                                                                                              | TCDD<br><br>Blood (serum) (from another study)<br><br>Lipid adjusted | Median (pg/g fat)<br><br><u>1976-1977:</u><br>Zone A: 447<br>Zone B: 94<br>Zone R: 48                      | <b>Cardiovascular mortality</b><br><br>RR (95% CI)<br>Zone A: 1.1 (0.8–1.5), 21 deaths<br>Zone B: 0.9 (0.8–1.1), 228 deaths<br><br>Risk of bias tier: 2                                        |

| Reference<br>Trial or Study name<br>(geography)                                                                                                             | Study type<br>Duration                       | Participants in the study<br>Sex (M/F)<br>Age at outcome assessment (years)<br>Year of tissue sampling                                   | Compounds<br>Measurement of exposure                                                           | Levels of exposure                                                                                                                                                          | Parameters measured and Measures of effect<br>Risk of bias tier                                                                                                                                                                                                                     |
|-------------------------------------------------------------------------------------------------------------------------------------------------------------|----------------------------------------------|------------------------------------------------------------------------------------------------------------------------------------------|------------------------------------------------------------------------------------------------|-----------------------------------------------------------------------------------------------------------------------------------------------------------------------------|-------------------------------------------------------------------------------------------------------------------------------------------------------------------------------------------------------------------------------------------------------------------------------------|
|                                                                                                                                                             |                                              | ages<br>1976/1977                                                                                                                        |                                                                                                | 1992-93 (geometric mean),<br>Zone A (n=7): 53.2<br>Zone B (n=51): 11.0<br>Reference area (n=55): 4.9                                                                        | <i>Comments:</i> Low power                                                                                                                                                                                                                                                          |
| <b>Steenland et al. (1999).</b><br>Cancer, heart disease, and diabetes in workers exposed to 2,3,7,8-tetrachlorodibenzo- <i>p</i> -dioxin.<br><br>n/a (USA) | Cohort<br><br>Follow up of round 15–57 years | 3,538 workers from 12 plants (e.g. PCP)<br><br>M<br><br>Age at outcome assessment: Not reported<br><br>Year of tissue sampling: unclear. | TCDD<br><br>Cumulative exposure scores based on JEM, calibrated against serum TCDD in subgroup | Estimated back-calculated levels about 200,000 ppt-years in septile 6–7 (e.g. 10 000 pg/g x 20 years)                                                                       | <b>Ischemic heart disease (IHD) mortality</b><br><br>RR (95% CI) (>400 deaths) (Ref Septile 1)<br><br>Septile 6: 1.57 (0.96–2.56)<br>Septile 7: 1.75 (1.07–2.87)<br><br>Risk of bias tier: 2<br><br><i>Comments:</i> No information on potential confounders. Lung cancer increased |
| <b>Bertazzi et al. (2001).</b> Health effects of dioxin exposure: A 20-year mortality study.<br><br>Seveso study (Italy, Seveso)                            | Cohort<br><br>20 years                       | About 45,000 in three zones<br><br>M, F<br><br>Age at outcome assessment: all ages<br><br>1976/1977, 1993/1994                           | TCDD<br><br>Blood (plasma) from another study<br><br>Lipid adjusted                            | Median (pg/g fat)<br><br><u>Zone A</u><br>1976-77: 447.0<br>1993-94:73.7<br><u>Zone B</u><br>1976-77: 94.0<br>1993-94: 12.4<br><u>Zone R:</u> 48.0<br><u>Reference:</u> 5.5 | <b>Cardiovascular mortality</b><br><br>RR (95% CI)<br>Zone A: 1.1 (0.8–1.5), 37 deaths<br>Zone B: 0.9 (0.8–1.1), 228 deaths<br><br>Risk of bias tier: 2<br><br><i>Comments:</i> Increased cardiovascular mortality only in early observation period                                 |
| <b>Ketchum and Michalek (2005).</b> Postservice mortality of                                                                                                | Cohort                                       | 1,262                                                                                                                                    | TCDD                                                                                           | Measured in sub-group, back-extrapolated                                                                                                                                    | <b>Cardiovascular mortality</b>                                                                                                                                                                                                                                                     |

| Reference<br><br>Trial or Study name<br>(geography)                                                                                                                                                                                                | Study type<br><br>Duration       | Participants in the study<br><br>Sex (M/F)<br><br>Age at outcome assessment (years)<br><br>Year of tissue sampling                                        | Compounds<br><br>Measurement of exposure                           | Levels of exposure                                                                                                                                                                                                                                                                                                                                    | Parameters measured and Measures of effect<br><br>Risk of bias tier                                                                                                                                                                                                                                         |
|----------------------------------------------------------------------------------------------------------------------------------------------------------------------------------------------------------------------------------------------------|----------------------------------|-----------------------------------------------------------------------------------------------------------------------------------------------------------|--------------------------------------------------------------------|-------------------------------------------------------------------------------------------------------------------------------------------------------------------------------------------------------------------------------------------------------------------------------------------------------------------------------------------------------|-------------------------------------------------------------------------------------------------------------------------------------------------------------------------------------------------------------------------------------------------------------------------------------------------------------|
| <p>Air Force veterans occupationally exposed to herbicides during the Vietnam War: 20-year follow-up results.</p> <p>Air Force Health Study (AFHS, Operation Ranch Hand) (US Veterans that served in Southeast Asia during Vietnam War)</p>        | 28–37 years                      | <p>M</p> <p>The median birth year and age range is indicated in Table VII. The median age range at exposure can be calculated</p> <p>1987, 1992, 1997</p> | <p>Blood (serum)</p> <p>Lipid adjusted</p>                         | <p>Median (range) (pg/g fat)</p> <p>High: 245<br/>Low: 65<br/>Background: &lt;32</p> <p>Comparison group:<br/>4.0 (0.4–54.8)<br/>Background:<br/>5.7 (0.6–10.0)<br/>Low: 15.0 (10.0–29.2)<br/>High: 47.4 (18.0–617.8)</p> <p>Serum level extrapolated to the end of service in Vietnam<br/>Low: 65.0 (32.2–117.4)<br/>High: 244.8 (117.9–4,221.9)</p> | <p>RR (95% CI) with internal non-exposed referents:<br/>Overall: 1.3 (1.0–1.6), 88 deaths.<br/>Ground crew: 1.7 (1.2–2.4), 40 deaths</p> <p>RR for subgroup with serum TCDD (29 deaths) were 1.3 (all) 1.5 (high), 1.8 (low) and 0.8 (background).</p> <p>Risk of bias tier: 2</p>                          |
| <p><b>Kang et al. (2006).</b> Health status of Army Chemical Corps Vietnam veterans who sprayed defoliant in Vietnam</p> <p>Air Force Health Study (AFHS, Operation Ranch Hand) (US Veterans that served in Southeast Asia during Vietnam War)</p> | <p>Cohort</p> <p>28–35 years</p> | <p>1,499 exposed (including 662 sprayers), and 1,428 non-Vietnam referents</p> <p>M</p> <p>Age at outcome assessment: 53.</p> <p>1999–2000</p>            | <p>TCDD</p> <p>Blood (serum) in subgroup</p> <p>Lipid adjusted</p> | <p>Mean (pg/g fat)<sup>(a)</sup></p> <p>Vietnam service self-reported herbicide spraying (n=357): 4.3</p> <p>Vietnam service self-reported no herbicide spraying (n=413): 2.7</p> <p>No Vietnam service (n=87): 2.1</p>                                                                                                                               | <p><b>Self-reported heart conditions</b></p> <p>No difference between Vietnam staff and referents.</p> <p>Within the Vietnam veterans OR was 1.4 (95% CI 1.1–1.9) for those who had sprayed versus those who had not.</p> <p>Risk of bias tier: 2</p> <p><i>Comments:</i> Adjusted for confounders. Low</p> |

| Reference                                                                                                                                               | Study type                | Participants in the study                                                                                                                                    | Compounds                                                                            | Levels of exposure                                                                                         | Parameters measured and Measures of effect                                                                                                                                            |
|---------------------------------------------------------------------------------------------------------------------------------------------------------|---------------------------|--------------------------------------------------------------------------------------------------------------------------------------------------------------|--------------------------------------------------------------------------------------|------------------------------------------------------------------------------------------------------------|---------------------------------------------------------------------------------------------------------------------------------------------------------------------------------------|
| Trial or Study name (geography)                                                                                                                         | Duration                  | Sex (M/F)<br><br>Age at outcome assessment (years)<br><br>Year of tissue sampling                                                                            | Measurement of exposure                                                              |                                                                                                            | Risk of bias tier                                                                                                                                                                     |
| <b>Pelclova et al. (2007).</b> 2,3,7,8-TCDD exposure, endothelial dysfunction and impaired microvascular reactivity.<br><br>n/a (The Czech Republic)    | Cross sectional<br><br>39 | 15 workers from Czech TCP plant, 14 referents<br><br>M<br><br>Mean (SD) age at outcome assessment:<br>Exposed: 59 (3)<br>Referents: 54 (2)<br><br>1996, 2001 | TCDD<br><br>Blood (serum), based on 1996 and 2001 measurements<br><br>Lipid adjusted | (pg/g fat)<br><br>Exposed men median (range): 110 (7–380)<br><br>Back-calculated levels: 120–9,000         | exposure contrast.<br>Microvascular function worse in the exposed group.<br><br>Risk of bias tier: 2<br><br><i>Comments</i> : Small study. Referents not comparable. Non-informative. |
| <b>Pelclova et al. (2009).</b> Chronic health impairment due to 2,3,7,8-tetrachloro-dibenzo- <i>p</i> -dioxin exposure.<br><br>n/a (The Czech Republic) | Cohort<br><br>44 years    | 11 workers from a Czech TCP plant<br><br>M<br><br>Age at exposure assessment: 64.4 (1.5)<br><br>2008                                                         | TCDD<br><br>Blood (serum)<br><br>Lipid adjusted                                      | Mean (SD, range) (pg/g fat)<br><br>274.0 (181.2, 53–756)                                                   | Hyperlipidaemia, hypertension, and increased IMT was common.<br><br>Risk of bias tier: 2<br><br><i>Comments</i> : Small study, no referent group. Non-informative.                    |
| <b>Boers et al. (2010).</b> Cause-specific mortality of Dutch chlorophenoxy herbicide manufacturing workers.<br><br>n/a (The Netherlands)               | Cohort<br><br>10–41 years | 2,016 workers from two Dutch plants for phenoxy herbicides<br><br>M                                                                                          | TCDD<br><br>Blood (serum) estimated from small group sampled                         | High exposure group: mean 600 in 1993, back-extrapolated 1,800<br><br>Sample of workers in 1993 (pg/g fat) | <b>Cardiovascular mortality</b><br><br>Hazard ratios close to 1.0 based on about 100 cases<br><br>Risk of bias tier: 2                                                                |

| Reference                                                                                                                                                                | Study type                                                     | Participants in the study                                                                                                                                       | Compounds                                                                                                                                                                   | Levels of exposure                                                                                                                                | Parameters measured and Measures of effect                                                                                                                                                                                                                           |
|--------------------------------------------------------------------------------------------------------------------------------------------------------------------------|----------------------------------------------------------------|-----------------------------------------------------------------------------------------------------------------------------------------------------------------|-----------------------------------------------------------------------------------------------------------------------------------------------------------------------------|---------------------------------------------------------------------------------------------------------------------------------------------------|----------------------------------------------------------------------------------------------------------------------------------------------------------------------------------------------------------------------------------------------------------------------|
| Trial or Study name (geography)                                                                                                                                          | Duration                                                       | Sex (M/F)<br><br>Age at outcome assessment (years)<br><br>Year of tissue sampling                                                                               | Measurement of exposure                                                                                                                                                     |                                                                                                                                                   | Risk of bias tier                                                                                                                                                                                                                                                    |
|                                                                                                                                                                          |                                                                | Mean (SD) age at entry of the exposed workers from factories A and B: around 32 (9.55).<br><br>1993                                                             | (Predictive exposure model based on back-extrapolation of TCDD from a sample of exposed workers (n=47) from factory A in 1993)<br><br>Not reported whether lipid adjustment | Low exposure: < 7.1<br>Medium exposure: 7.1–124.1<br>High exposure: >124.1                                                                        | <i>Comments:</i> No confounder adjustment.                                                                                                                                                                                                                           |
| <b>Manuwald et al. (2012).</b><br>Mortality study of chemical workers exposed to dioxins: follow-up 23 years after chemical plant closure.<br><br>n/a (Germany, Hamburg) | Cohort<br><br>23 year follow up after a chemical plant closure | 1,589 workers at a German chemical plant (e.g. 2,4,5-T)<br><br>M, F<br><br>Age at outcome assessment: Unclear<br><br>Year of tissue sampling: unclear (adults). | TCDD<br><br>Blood (serum)<br><br>Lipid adjusted                                                                                                                             | Cumulative exposure estimated from work histories and serum TCDD (lipid adjusted) in subgroup.<br><br>Median: 77 pg/g fat<br>Upper quartile: >335 | <b>Cardiovascular mortality</b><br><br>SMR (95% CI): 1.05 (0.9-1.2), 309 deaths<br><br>Ref. Hamburg population.<br>No trend across quartiles of cumulative exposure.<br><br>Risk of bias tier: 2<br><br><i>Comments:</i> No information about potential confounders. |
| <b>Lin et al. (2012b).</b><br>Environmental exposure to dioxin-like compounds and the mortality                                                                          | Cohort<br><br>4.63 (range:                                     | 2,361<br><br>M, F                                                                                                                                               | 17 PCDD/Fs,<br>9 DL-PCBs (3 non- <i>ortho</i> and 6                                                                                                                         | (pg WHO-TEQ/g fat)<br><br>Median: 19.2                                                                                                            | <b>Mortality risk</b><br><br>Deaths during the follow-up period: n=242,                                                                                                                                                                                              |

| Reference                                                                                                              | Study type                                                                                                             | Participants in the study                                                         | Compounds                                                           | Levels of exposure                                                                                                   | Parameters measured and Measures of effect                                                                                                                                                                                                                                                                    |
|------------------------------------------------------------------------------------------------------------------------|------------------------------------------------------------------------------------------------------------------------|-----------------------------------------------------------------------------------|---------------------------------------------------------------------|----------------------------------------------------------------------------------------------------------------------|---------------------------------------------------------------------------------------------------------------------------------------------------------------------------------------------------------------------------------------------------------------------------------------------------------------|
| Trial or Study name (geography)                                                                                        | Duration                                                                                                               | Sex (M/F)<br><br>Age at outcome assessment (years)<br><br>Year of tissue sampling | Measurement of exposure                                             |                                                                                                                      | Risk of bias tier                                                                                                                                                                                                                                                                                             |
| risk in the U.S. population.<br><br>NHANES (USA)                                                                       | <1–7.67)                                                                                                               | Age at baseline ranged from 40 to 5+<br><br>1999                                  | mono- <i>ortho</i> PCBs)<br><br>Blood (serum)<br><br>Lipid adjusted | IQR: 13.3–27.9                                                                                                       | including:<br>- 75 from cardiovascular disease<br><br>Increased mortality risk associated with logarithmically expressed total TEQs for all-cause deaths (HR=1.19, 95% CI 1.02-1.39, p=0.02).<br><br>Similar graded dose-response trends were found for cardiovascular mortality.<br><br>Risk of bias tier: 1 |
| <b>Cypel et al. (2016).</b> Herbicide Exposure, Vietnam Service, and Hypertension Risk in Army Chemical Corps Veterans | Cohort<br><br>Work categories (herbicide spray history) during military service (1965-1971) used as proxy for exposure | 3,086<br><br>M<br><br>Age at outcome assessment: unclear.<br><br>1999–2000        | TCDD<br><br>Blood serum<br><br>Lipid adjusted                       | Mean (range) (n = 636)<br><br>Vietnam-herbicide sprayers: 3.5 (0.5–30.6)<br><br>Vietnam-non sprayers: 2.5 (0.7–17.7) | <b>Hypertension Risk</b><br><br>ORadjusted [95% CI] 1.74 (95%CI: 1.44,2.11)]<br><br>Risk of bias tier: 2                                                                                                                                                                                                      |

(a): Units confirmed by the authors of the study.

### A.8.7. Studies on hepatic disorders and digestive effects

**Table 71.** Epidemiological studies on the association between exposure to PCDD/Fs and DL-PCBs and **hepatic disorders and digestive effects**. Details about the risk of bias appraisal can be found in **Annex A.9.7**.

| Reference                                                                                                                             | Study Type                | Participants in the study                                                            | Compounds Measurement of exposure                                                                            | Levels of exposure                                                             | Parameters measured and Measures of effect                                                                                                                                                                                                                                                                                                                                                                                                                                                                                                                                                                                                                                                                                                                                                                                          |
|---------------------------------------------------------------------------------------------------------------------------------------|---------------------------|--------------------------------------------------------------------------------------|--------------------------------------------------------------------------------------------------------------|--------------------------------------------------------------------------------|-------------------------------------------------------------------------------------------------------------------------------------------------------------------------------------------------------------------------------------------------------------------------------------------------------------------------------------------------------------------------------------------------------------------------------------------------------------------------------------------------------------------------------------------------------------------------------------------------------------------------------------------------------------------------------------------------------------------------------------------------------------------------------------------------------------------------------------|
| Trial or Study name (Geography)                                                                                                       | Duration                  | Sex<br><br>Age at outcome assessment (years)<br><br>Year of tissue sampling          |                                                                                                              |                                                                                | Risk of bias tier                                                                                                                                                                                                                                                                                                                                                                                                                                                                                                                                                                                                                                                                                                                                                                                                                   |
| <b>Neuberger et al. (1999).</b> Persistent health effects of dioxin contamination in herbicide production.<br><br>n/a (Austria, Linz) | Cohort<br><br>21–27 years | 50<br><br>M, F<br><br>Average (SD) age at outcome assessment: 57.8 (6.8)<br><br>1996 | 17 PCDD/Fs, 7 DL-PCBs (-126, -169, -105, -118, -156, -157, -180)<br><br>Blood (plasma)<br><br>Lipid adjusted | pg I-TEQ/g fat<br><br>TCDD<br>Median: 280.0<br>Mean: 465.5<br>Maximum: 2,900.0 | <b>Symptom prevalence rates, Stomach trouble, Levels of <math>\gamma</math>-GT, SGOT (AST) and SGPT (ALT).</b><br><br>$\gamma$ -GT (U/L)<br>Exposed: 42.2 $\pm$ 44.3<br>Controls A: 19.1 $\pm$ 11.9    Controls B: 21.3 $\pm$ 29.1<br><br>SGOT (U/L)<br>Exposed: 16.7 $\pm$ 16.5<br>Controls A: 12.2 $\pm$ 3.6    Controls B: not analysed.<br><br>SGPT (U/L)<br>Exposed: 20.6 $\pm$ 14.8<br>Controls A: 15.1 $\pm$ 5.9    Controls B: not analysed.<br><br>Comparison of SGOT and SGPT levels, together with urinary coproporphyrin I/III ratios suggest disturbed liver function associated with higher TCDD plasma levels and independent of alcohol consumption. Good association with chronic liver dysfunction but no direct evidence of liver disease per se. Fewer numbers in study than others<br><br>Risk of bias tier: 1 |



| Reference<br>Trial or Study name<br>(Geography)                                                                                                                                                                                              | Study Type<br>Duration                    | Participants in the study<br>Sex<br>Age at outcome assessment (years)<br>Year of tissue sampling       | Compounds Measurement of exposure                      | Levels of exposure                                                                                                                                                                                                                                                                                                                                                                                                                                                                                  | Parameters measured and Measures of effect<br>Risk of bias tier                                                                                                                                                                                                                                                                                                                                                                                                                                                                                                                                                                                                                                                                                                                                                                                                                                                                          |
|----------------------------------------------------------------------------------------------------------------------------------------------------------------------------------------------------------------------------------------------|-------------------------------------------|--------------------------------------------------------------------------------------------------------|--------------------------------------------------------|-----------------------------------------------------------------------------------------------------------------------------------------------------------------------------------------------------------------------------------------------------------------------------------------------------------------------------------------------------------------------------------------------------------------------------------------------------------------------------------------------------|------------------------------------------------------------------------------------------------------------------------------------------------------------------------------------------------------------------------------------------------------------------------------------------------------------------------------------------------------------------------------------------------------------------------------------------------------------------------------------------------------------------------------------------------------------------------------------------------------------------------------------------------------------------------------------------------------------------------------------------------------------------------------------------------------------------------------------------------------------------------------------------------------------------------------------------|
| <p><b>Michalek et al. (2001a).</b> Serum dioxin and hepatic abnormalities in veterans of Operation Ranch Hand.</p> <p>Air Force Health Study (AFHS, Operation Ranch Hand) (US Veterans that served in Southeast Asia during Vietnam War)</p> | <p>Cohort study</p> <p>11 to 30 years</p> | <p>2,130</p> <p>M</p> <p>Age at outcome assessment: unclear (adults)</p> <p>1982, 1985, 1981, 1992</p> | <p>TCDD</p> <p>Blood (serum)</p> <p>Lipid adjusted</p> | <p>pg/g fat</p> <p>Background: <math>\leq 10</math><br/>'Low': <math>&gt; 10</math> and initial <math>\leq 94.1</math><br/>'High': <math>&gt; 10</math> ppt and <math>&gt; 94.1</math></p> <p>Year 1992<br/>Background levels (n=401)<br/>5.7 (0-10)</p> <p>'Low' (n=264)<br/>Median (range):<br/>15 (10-27)</p> <p>'High' (n=266)<br/>Median (range):<br/>45.7 (18-618)</p> <p>Serum level extrapolated to the end of service in Vietnam:<br/>'Low': 52.6 (28-94)<br/>'High': 194.8 (94-3,290)</p> | <p><b>Hepatic abnormalities and indices of hepatic function</b></p> <p>Adjusted OR (95% CI)</p> <p><b>Hepatomegaly</b><br/>Comparison: 1.0<br/>Background: 0.7 (0.3, 1.6)<br/>'Low': 0.4 (0.1, 1.2), 'High': 1.4 (0.7, 3.1)</p> <p><b>Non-alcoholic chronic liver disease and cirrhosis</b><br/>Comparison: 1.0<br/>Background: 2.1 (0.7, 6.0)<br/>'Low': 1.3 (0.3, 4.7), 'High': 1.4 (0.5, 4.3)</p> <p><b>Other liver disorders</b><br/>Comparison: 1.0<br/>Background: 1.0 (0.8, 1.4)<br/>'Low': 1.1 (0.8, 1.4), 'High': 1.6 (1.2, 2.1)</p> <p><b>Unspecified disorders of the liver</b><br/>Comparison: 1.0<br/>Background: 0.8 (0.4, 2.0)<br/>'Low': 1.0 (0.4, 2.4), 'High': 1.1 (0.4, 2.7)</p> <p><b>Nonspecific elevation of transaminase or LDH</b><br/>Comparison: 1.0<br/>Background: 0.8 (0.4, 1.8)<br/>'Low': 1.0 (0.4, 2.3), 'High': 2.7 (1.4, 5.1)</p> <p><b>Other nonspecific abnormal results of function studies</b></p> |

| Reference<br>Trial or Study name<br>(Geography)                                                                                                                                  | Study Type<br>Duration                                                  | Participants in the study<br>Sex<br>Age at outcome assessment (years)<br>Year of tissue sampling                     | Compounds Measurement of exposure                       | Levels of exposure                                                                                                                        | Parameters measured and Measures of effect<br>Risk of bias tier                                                                                                                                                                                                                                                                                                                            |
|----------------------------------------------------------------------------------------------------------------------------------------------------------------------------------|-------------------------------------------------------------------------|----------------------------------------------------------------------------------------------------------------------|---------------------------------------------------------|-------------------------------------------------------------------------------------------------------------------------------------------|--------------------------------------------------------------------------------------------------------------------------------------------------------------------------------------------------------------------------------------------------------------------------------------------------------------------------------------------------------------------------------------------|
|                                                                                                                                                                                  |                                                                         |                                                                                                                      |                                                         |                                                                                                                                           | <p><b>of the liver</b><br/>Comparison: 1.0<br/>Background: 1.0 (0.7, 1.3)<br/>'Low': 0.9 (0.6, 1.4), 'High': 1.4 (1.0, 2.0)</p> <p><i>Comments:</i> Association with liver dysfunction but not established that is causal. Link not clear between liver dysfunction and disease.</p> <p>Risk of bias tier: 1</p>                                                                           |
| <p><b>Baccarelli et al. (2005).</b> Health status and plasma dioxin levels in chloracne cases 20 years after the Seveso, Italy accident.</p> <p>Seveso study (Italy, Seveso)</p> | <p>Case control study</p> <p>17-22 years after the Seveso incident.</p> | <p>293</p> <p>M, F</p> <p>Age at outcome assessment: 17-22 years older than at time of exposure</p> <p>1993-1998</p> | <p>TCDD</p> <p>Blood (plasma)</p> <p>Lipid adjusted</p> | <p>&lt; 10 pg/g fat (n=215)</p> <p>&gt; 10 pg/g fat (n=78)</p>                                                                            | <p><b>Gastrointestinal diseases</b></p> <p>Summary on history of health conditions in cases: gastrointestinal (9.9%).</p> <p>Controls: no significant difference was observed between cases and controls in the unadjusted analysis, as well as in the analysis adjusted for age and sex (95% CIs were large, and P-value estimates were not significant).</p> <p>Risk of bias tier: 1</p> |
| <p><b>Ketchum and Michalek (2005).</b> Postservice mortality of Air Force veterans occupationally exposed to herbicides during the Vietnam War: 20-year follow-up results.</p>   | <p>Cohort study</p> <p>28– 37 years</p>                                 | <p>2,452</p> <p>M</p> <p>The median birth year and age range is indicated in Table VII. The median age range</p>     | <p>TCDD</p> <p>Blood (serum)</p> <p>Lipid adjusted</p>  | <p>Median (range) (pg/g fat)</p> <p>Comparison group: 4.0 (0.4–54.8)</p> <p>Background: 5.7 (0.6–10.0)</p> <p>'Low': 15.0 (10.0–29.2)</p> | <p><b>Post service mortality – Digestive diseases</b></p> <p>No evidence of increased mortality due to disease of digestive system.</p> <p>The RRs of death caused by diseases of the digestive system was not significantly increased (based on 10 deaths)</p> <p>Number of deaths (%): Ranch Hand = 10 (0.8), Comparison = 89 (0.5)</p>                                                  |

| Reference<br>Trial or Study name<br>(Geography)                                                                                          | Study Type<br>Duration      | Participants in the study<br>Sex<br>Age at outcome assessment (years)<br>Year of tissue sampling               | Compounds<br>Measurement of exposure    | Levels of exposure                                                                                                                                                                                                                                               | Parameters measured and Measures of effect<br>Risk of bias tier                                                                                                                                                                                                                                                                                                                                                                                                                                                                                                                                                                                                                                                                |
|------------------------------------------------------------------------------------------------------------------------------------------|-----------------------------|----------------------------------------------------------------------------------------------------------------|-----------------------------------------|------------------------------------------------------------------------------------------------------------------------------------------------------------------------------------------------------------------------------------------------------------------|--------------------------------------------------------------------------------------------------------------------------------------------------------------------------------------------------------------------------------------------------------------------------------------------------------------------------------------------------------------------------------------------------------------------------------------------------------------------------------------------------------------------------------------------------------------------------------------------------------------------------------------------------------------------------------------------------------------------------------|
| Air Force Health Study (AFHS, Operation Ranch Hand) (US Veterans that served in Southeast Asia during Vietnam War)                       |                             | at exposure can be calculated.<br>1987, 1992, 1997                                                             |                                         | 'High': 47.4 (18.0–617.8)<br>Serum level extrapolated to the end of service in Vietnam:<br>'Low': 65.0 (32.2–117.4)<br>'High': 244.8 (117.9–4221.9)                                                                                                              | RR (95% CI): 1.6 (0.8–3.0), $p = 0.17$<br>Risk of bias tier: 2                                                                                                                                                                                                                                                                                                                                                                                                                                                                                                                                                                                                                                                                 |
| <b>Boers et al. (2010).</b><br>Cause-specific mortality of Dutch chlorophenoxy herbicide manufacturing workers.<br>n/a (The Netherlands) | Cohort study<br>10-41 years | 2016<br>M<br>Mean age at entry of the exposed workers from factories A and B: around 32 years (SD: 9.55). 1993 | TCDD<br>Blood (serum)<br>Lipid adjusted | Back extrapolation of TCDD measurements in serum collected from a sample of exposed workers (n = 47) from factory A in 1993.<br><br>Low exposure:<br>TCDD < 7.1 pg/g fat<br><br>Medium exposure:<br>7.1-124.1 pg/g fat<br><br>High exposure:<br>> 124.1 pg/g fat | <b>Cause of death</b> (all causes and some specific cancers, Infectious and bacterial diseases, Disease of endocrine system and blood, Mental disorders, Disease of nervous system and sense organs, Diseases of circulatory system, Diseases of respiratory system, <b>Digestive system</b> , Genital-urinary system, Ill-defined and unspecified causes, Accidents, poisoning and violence)<br><br><b>Digestive system</b><br>Factory A: Exposed/non-exposed: 6/6<br>HR (95% CI): 0.60 (0.18 to 2.01)<br><br>Factory B: Exposed/non-exposed: 0/4<br>HR (95% CI): approximately zero<br><br>Risk of bias tier: 2<br><br><i>Comments:</i> Potentially many confounding exposures. No association with digestive system cancers |

### A.8.8. Studies on effects in the immune system

**Table 72.** Epidemiological studies on the association between exposure to PCDD/Fs and DL-PCBs and effects on the **immune system**. Details about the risk of bias appraisal can be found in **Annex A.9.8**.

| Reference                                                                                                                                                                                | Study Type                                                  | Participants in the study                                                                                                                                                     | Compounds                                       | Levels of exposure                                                                                                                                                                                                                  | Parameters measured and Measures of effect                                                                                                                                                                                                                                                                                                                                                                                                                                                                                                                                                                             |
|------------------------------------------------------------------------------------------------------------------------------------------------------------------------------------------|-------------------------------------------------------------|-------------------------------------------------------------------------------------------------------------------------------------------------------------------------------|-------------------------------------------------|-------------------------------------------------------------------------------------------------------------------------------------------------------------------------------------------------------------------------------------|------------------------------------------------------------------------------------------------------------------------------------------------------------------------------------------------------------------------------------------------------------------------------------------------------------------------------------------------------------------------------------------------------------------------------------------------------------------------------------------------------------------------------------------------------------------------------------------------------------------------|
| Trial or Study name (Geography)                                                                                                                                                          | Duration                                                    | Sex                                                                                                                                                                           | Measurement of exposure                         |                                                                                                                                                                                                                                     | Risk of bias tier                                                                                                                                                                                                                                                                                                                                                                                                                                                                                                                                                                                                      |
|                                                                                                                                                                                          |                                                             | Age at outcome assessment (years)                                                                                                                                             |                                                 |                                                                                                                                                                                                                                     |                                                                                                                                                                                                                                                                                                                                                                                                                                                                                                                                                                                                                        |
|                                                                                                                                                                                          |                                                             | Year of tissue sampling                                                                                                                                                       |                                                 |                                                                                                                                                                                                                                     |                                                                                                                                                                                                                                                                                                                                                                                                                                                                                                                                                                                                                        |
| <b>STUDIES IN ADULTS</b>                                                                                                                                                                 |                                                             |                                                                                                                                                                               |                                                 |                                                                                                                                                                                                                                     |                                                                                                                                                                                                                                                                                                                                                                                                                                                                                                                                                                                                                        |
| <b>Jung et al. (1998).</b><br>Immunologic findings in workers formerly exposed to 2,3,7,8-tetrachlorodibenzo- <i>p</i> -dioxin and its congeners<br><br>n/a (Germany, Mainz and Hamburg) | Case control<br><br>2 years duration of study               | 192 workers, 28 controls<br><br>M, F<br><br>Median (range) age at outcome assessment: 56 (27–83)<br><br>Exposed: 55.5 (37–69.3)<br>Control: 53.8 (42.8–65.3)<br><br>1992–1994 | TCDD<br><br>Blood<br><br>Lipid adjusted         | Median (range): 103.7 (11.1–1,153.1)<br><br>95%: 592.3 pg I-TEQ /g fat<br><br>Highly exposed group: Median (range): 217 (33.6–2,252)<br>Median I-TEQ: 425.9<br><br>Control group: Median (range): 3.9 (2.9–6)<br>Median I-TEQ: 15.4 | <b>IgA, IgG, IgM, specific and natural autoantibodies, monoclonal antibodies, L-Chains in urine, lymphocyte surface markers, lymphocyte proliferation, tetanus antibodies following vaccination</b><br><br>No correlation of frequency of infectious diseases and PCDD/Fs were noted.<br><br>No correlation between TCDD or TEQ levels and tetanus antibodies, and between TCDD or TEQ levels and antibodies were observed.<br><br>Significant correlations of T lymphocytes proliferative responses, but restricted to tetanus vaccinated individuals with logTEQ, logTCDD were observed.<br><br>Risk of bias tier: 2 |
| <b>Halperin et al. (1998).</b><br>Immunological markers among workers exposed to 2,3,7,8-tetrachlorodibenzo- <i>p</i> -                                                                  | Cross-sectional<br><br>Exposure in New Jersey plants: 1951– | 259<br><br>M<br><br>Age (range) at                                                                                                                                            | TCDD<br><br>Blood (serum)<br><br>Lipid adjusted | pg/g fat<br><br>Referents (n=243): 0–19                                                                                                                                                                                             | <b>Enumeration of circulating leukocyte and lymphocyte populations, proliferative responses of circulating lymphocytes to mitogens and antigens, serum concentrations of the major immunoglobulins, complement</b>                                                                                                                                                                                                                                                                                                                                                                                                     |

| Reference<br>Trial or Study name<br>(Geography)                                                                                                                                                                   | Study Type<br>Duration                                                         | Participants in the study<br>Sex<br>Age at outcome assessment (years)<br>Year of tissue sampling | Compounds<br>Measurement of exposure                | Levels of exposure                                                                                                                                                                 | Parameters measured and Measures of effect<br>Risk of bias tier                                                                                                                                                                                                                                                                                                                                                                                                                                                                                                                                                                                                   |
|-------------------------------------------------------------------------------------------------------------------------------------------------------------------------------------------------------------------|--------------------------------------------------------------------------------|--------------------------------------------------------------------------------------------------|-----------------------------------------------------|------------------------------------------------------------------------------------------------------------------------------------------------------------------------------------|-------------------------------------------------------------------------------------------------------------------------------------------------------------------------------------------------------------------------------------------------------------------------------------------------------------------------------------------------------------------------------------------------------------------------------------------------------------------------------------------------------------------------------------------------------------------------------------------------------------------------------------------------------------------|
| dioxin.<br>National Institute for Occupational Safety and Health (NIOSH) (USA, New Jersey and Missouri)                                                                                                           | 1969<br>Missouri plant:<br>1968–1972<br><br>Duration of follow up: 15–36 years | outcome assessment:<br>31–77 years<br><br>1987–1988                                              |                                                     | Workers:<br>Overall range: 0-3,389<br><br>Category:<br><20 (n=65)<br>20-51 (n=47)<br>52-125 (n=49)<br>126-297 (n=49)<br>298-3389 (n=49)                                            | <b>factor C3</b><br><br>Increased odds of lower counts of CD26 cells (activated T cells) were observed in all exposure categories except the lowest.<br><20 OR=1.0, 95% CI 0.5–1.8<br>20-51 OR=1.6, 95% CI 0.8–3.2<br>52-125 OR=2.7, 95% CI 1.4–5.1<br>126-297 OR=2.6, 95% CI 1.4–4.9<br>298-3389 OR=2.4, 95% CI 1.3–4.6<br><br>Spontaneous proliferation of cultured lymphocytes was reduced, but increased of responses to concanavalin and pokeweed in lymphocytes from workers in the high TCDD category were observed.<br><br>Age, cigarette smoking, and alcohol were significant predictors of several immunological outcomes.<br><br>Risk of bias tier: 2 |
| <b>Michalek et al. (1999b)</b> . Serum dioxin and immunologic response in veterans of Operation Ranch Hand.<br><br>Air Force Health Study (AFHS, Operation Ranch Hand) (US Veterans that served in Southeast Asia | Cohort<br><br>11–30 years                                                      | 2,100<br><br>M<br><br>Mean age at outcome assessment:<br>background: around 55<br>low: around 55 | TCDD<br><br>Blood (serum)<br><br>Not lipid adjusted | (pg/g fat)<br><br>Background: <10<br>'Low': >10 and <94<br>'High': > 10 and >94<br><br>Median (range)<br>Background: 5.7 (0–10)<br>'Low': 52.8 (28–94)<br>'High': 194.7 (94–3,290) | <b>Abnormal skin tests, average lymphocyte populations, average quantitative immunoglobulin concentrations, autoantibody panel and monoclonal immunoglobulins.</b><br><br>Some statistically significant differences in lymphocyte subpopulations (CD20 B cells and CD16+CD56+CD3+ cells) were observed.<br><br>No differences in immunoglobulin concentrations,                                                                                                                                                                                                                                                                                                  |

| Reference<br>Trial or Study name<br>(Geography)                                                                                                                                                                                                     | Study Type<br>Duration     | Participants in the study<br>Sex<br>Age at outcome assessment (years)<br>Year of tissue sampling                                    | Compounds<br>Measurement of exposure                                                   | Levels of exposure                                                                                                                                    | Parameters measured and Measures of effect<br>Risk of bias tier                                                                                                                                                                                                                                                        |
|-----------------------------------------------------------------------------------------------------------------------------------------------------------------------------------------------------------------------------------------------------|----------------------------|-------------------------------------------------------------------------------------------------------------------------------------|----------------------------------------------------------------------------------------|-------------------------------------------------------------------------------------------------------------------------------------------------------|------------------------------------------------------------------------------------------------------------------------------------------------------------------------------------------------------------------------------------------------------------------------------------------------------------------------|
| during Vietnam War)                                                                                                                                                                                                                                 |                            | High: 51.2<br><br>1987, 1992                                                                                                        |                                                                                        | Comparison group: 4 (0–10)                                                                                                                            | pattern of autoantibodies were noted.<br><br>Overall, no evidence of a consistent relation between TCDD exposure and immune system alteration was shown.<br><br>Risk of bias tier: 2                                                                                                                                   |
| <b>Kitamura et al. (2000).</b> Health effects of chronic exposure to polychlorinated dibenzo- <i>p</i> -dioxins (PCDD), dibenzofurans (PCDF) and coplanar PCB (Co-PCB) on municipal waste incinerator workers.<br><br>n/a (Osaka prefecture, Japan) | Cross-sectional<br><br>n/a | 92 (M, 88 with blood analysis), 4 (F)<br><br>M, F<br><br>Mean age at outcome assessment: 40±16<br><br>10 years exposure<br><br>1998 | 17 PCDD/Fs, 3 DL-PCBs (PCB-77, -126, -169)<br><br>Blood (plasma)<br><br>Lipid adjusted | Total TEQ<br>Mean (range) (pg TEQ/g fat)<br><br>100 (7–831)                                                                                           | <b>Lymphocyte distribution, ConA, PHA proliferation, NK activity</b><br><br>Significant decrease of PHA proliferation and NK activity<br><br>Risk of bias tier: 2                                                                                                                                                      |
| <b>Nagayama et al. (2001).</b> Effects of contamination level of dioxins and related chemicals on thyroid hormone and immune response systems in patients with “Yusho”.                                                                             | Cohort<br><br>26–29 years  | 16<br><br>M, F<br><br>Mean (range) age at outcome assessment: 55.0 (28–75) years                                                    | 17 PCDD/Fs, 12 DL-PCBs<br><br>Blood<br><br>Lipid adjusted                              | Median (range) (pg WHO <sub>1998</sub> -TEQ/g fat)<br><br>222.4 (27.8–1,048.5)<br><br>(about seven times higher than that of healthy Japanese people) | <b>Lymphocyte subsets, serum immunoglobulin and autoantibodies</b><br><br>Ratios of CD4 to CD8 positive lymphocytes were not associated to blood TEQs.<br><br>Serum IgA, IgG and IgM were not markedly different in the three blood TEQ groups. Respective correlation coefficients between blood TEQ levels and serum |

| Reference                                                                                                                                                             | Study Type                   | Participants in the study                                                       | Compounds                                        | Levels of exposure                                                                                                                               | Parameters measured and Measures of effect                                                                                                                                                                                                                                                                                                                                                                                                                                                                                                                                                                                              |
|-----------------------------------------------------------------------------------------------------------------------------------------------------------------------|------------------------------|---------------------------------------------------------------------------------|--------------------------------------------------|--------------------------------------------------------------------------------------------------------------------------------------------------|-----------------------------------------------------------------------------------------------------------------------------------------------------------------------------------------------------------------------------------------------------------------------------------------------------------------------------------------------------------------------------------------------------------------------------------------------------------------------------------------------------------------------------------------------------------------------------------------------------------------------------------------|
| Trial or Study name (Geography)                                                                                                                                       | Duration                     | Sex<br><br>Age at outcome assessment (years)<br><br>Year of tissue sampling     | Measurement of exposure                          |                                                                                                                                                  | Risk of bias tier                                                                                                                                                                                                                                                                                                                                                                                                                                                                                                                                                                                                                       |
| Yusho study (Japan)                                                                                                                                                   |                              | 1994–1995                                                                       |                                                  |                                                                                                                                                  | <p>concentrations were IgA - 0.115 , IgG - 0.039 and IgM - 0.077, absolute values were very small, and none of them statistically significant.</p> <p>No significant differences in expression of antinuclear antibody were noted. Rheumatoid factor seemed to proportionally increase with total TEQ levels in the blood (3.8% in the lowest TEQ group, 16.7% in the middle one and 21.1% in the highest one), but this was not statistically significant.</p> <p>LE factor was not detected in the serum of any Yusho patient.</p> <p>Risk of bias tier: 2</p>                                                                        |
| <p><b>Baccarelli et al. (2002).</b> Immunologic effects of dioxin: New results from Seveso and comparison with other studies.</p> <p>Seveso study (Italy, Seveso)</p> | Case control<br><br>20 years | 121<br><br>M, F<br><br>Age at outcome assessment: not reported<br><br>1992–1994 | TCDD<br><br>Blood (plasma)<br><br>Lipid adjusted | (pg/g fat)<br><br>Range: 1.2-89.9<br><br>Quintiles:<br>1.2-3.5 (n=21)<br>3.6-6.0 (n=21)<br>6.1-9.3 (n=23)<br>9.4-20.0 (n=22)<br>20.1-89.9 (n=22) | <p><b>Immunoglobulins: IgG, IgM, IgA, Complement components: C3, C4</b></p> <p>Plasma IgG levels were decreased with increasing plasma-TCDD (<math>r=-0.35</math>, <math>p=0.0002</math>).</p> <p>Median IgG concentration decreased from 1,526 mg/dL in group with lowest (&lt;3.5 ppt) TCDD levels to 1,163 mg/dL in group with highest (20.1–89.9 ppt) TCDD levels (<math>p=0.002</math>).</p> <p>The association was significant (<math>p=0.0004</math>) after adjusting for age, sex, smoking, and consumption of domestic livestock and poultry. Association persisted after exclusion of subjects with inflammatory diseases</p> |



| Reference<br>Trial or Study name<br>(Geography)                                                                                                                                                  | Study Type<br>Duration                | Participants in the study<br>Sex<br>Age at outcome assessment (years)<br>Year of tissue sampling                           | Compounds<br>Measurement of exposure             | Levels of exposure             | Parameters measured and Measures of effect<br>Risk of bias tier                                                                                                                                                                                                                                                                                                                                                                                                                                                                                                                                                                                                                                                                                                                                                               |
|--------------------------------------------------------------------------------------------------------------------------------------------------------------------------------------------------|---------------------------------------|----------------------------------------------------------------------------------------------------------------------------|--------------------------------------------------|--------------------------------|-------------------------------------------------------------------------------------------------------------------------------------------------------------------------------------------------------------------------------------------------------------------------------------------------------------------------------------------------------------------------------------------------------------------------------------------------------------------------------------------------------------------------------------------------------------------------------------------------------------------------------------------------------------------------------------------------------------------------------------------------------------------------------------------------------------------------------|
|                                                                                                                                                                                                  |                                       |                                                                                                                            |                                                  |                                | and those using antibiotics or nonsteroidal anti-inflammatory drugs.<br><br>IgM, IgA, C3, and C4 plasma concentrations did not exhibit any consistent association with TCDD levels.<br><br>Risk of bias tier: 2                                                                                                                                                                                                                                                                                                                                                                                                                                                                                                                                                                                                               |
| <b>Baccarelli et al. (2004).</b> Aryl-hydrocarbon receptor-dependent pathway and toxic effects of TCDD in humans: a population-based study in Seveso, Italy.<br><br>Seveso study (Italy, Seveso) | Cohort<br><br>20 years after exposure | 121 (62 study subjects, 59 controls)<br><br>Sex not specified<br><br>Age outcome assessment: not reported<br><br>1992–1994 | TCDD<br><br>Blood (plasma)<br><br>Lipid adjusted | Range (pg/g fat)<br><br>3.5–90 | <b>Plasma IgG levels, AHR dependent markers in lymphocytes</b><br><br>Subjects from the zones contaminated by TCDD showed lower plasma IgG levels compared to subjects from the surrounding reference area (non-ABR).<br><br>Median IgG levels were:<br>Zone non-ABR (n=58): 1403 mg/dL<br>Zone B (n=55): 1,294 mg/dL, P=0.03 versus non-ABR<br>Zone A (n=7): 1,142 mg/dL, P=0.01 versus non-ABR<br><br>Plasma IgG progressively decreased with increasing lipid-adjusted TCDD plasma concentration ( $r = -0.35$ ; $P=0.0002$ ).<br><br>After adjusting for age, sex, smoking, and consumption of domestic livestock, the inverse association between plasma TCDD and IgG remained highly significant ( $P=0.0004$ ).<br><br>IgM, IgA, and complement component C3 and C4 plasma concentrations did not exhibit a consistent |

| Reference<br>Trial or Study name<br>(Geography)                                                                                                                                                  | Study Type<br>Duration                                     | Participants in the study<br>Sex<br>Age at outcome assessment (years)<br>Year of tissue sampling                                | Compounds<br>Measurement of exposure             | Levels of exposure                                                                                                                                                                                                                                                                          | Parameters measured and Measures of effect<br>Risk of bias tier                                                                                                                                                                                                                                                                                                                                                      |
|--------------------------------------------------------------------------------------------------------------------------------------------------------------------------------------------------|------------------------------------------------------------|---------------------------------------------------------------------------------------------------------------------------------|--------------------------------------------------|---------------------------------------------------------------------------------------------------------------------------------------------------------------------------------------------------------------------------------------------------------------------------------------------|----------------------------------------------------------------------------------------------------------------------------------------------------------------------------------------------------------------------------------------------------------------------------------------------------------------------------------------------------------------------------------------------------------------------|
|                                                                                                                                                                                                  |                                                            |                                                                                                                                 |                                                  |                                                                                                                                                                                                                                                                                             | association with TCDD plasma levels<br><br>AhR mRNA levels in uncultured lymphocytes negatively associated with plasma TCDD (p=0.03).<br><br>Risk of bias tier: 2                                                                                                                                                                                                                                                    |
| <b>Baccarelli et al. (2005).</b> Health status and plasma dioxin levels in chloracne cases 20 years after the Seveso, Italy accident.<br><br>Seveso study (Italy, Seveso)                        | Case control<br><br>17-22 years after the Seveso incident. | 293<br><br>M, F<br><br>Age at outcome assessment: 17–22 years older than at time of exposure<br><br>1993–1998                   | TCDD<br><br>Blood (plasma)<br><br>Lipid adjusted | < 10 pg/g fat (n=215)<br>> 10 pg/g fat (n=78)                                                                                                                                                                                                                                               | <b>Allergic diseases, Infectious diseases,</b><br><br>No significant difference between cases and controls for allergic, gastrointestinal, and infectious diseases, either unadjusted or adjusted for age and sex, were observed.<br><br>Risk of bias tier: 2                                                                                                                                                        |
| <b>Saberi Hosnijeh et al. (2011).</b> Long-term effects on humoral immunity among workers exposed to 2,3,7,8-tetrachlorodibenzo-p-dioxin (TCDD).<br><br>Dutch herbicide cohort (The Netherlands) | Cross-sectional<br><br>n/a                                 | 153<br><br>M<br><br>Mean (SD) age at outcome assessment:<br>Factory A:<br>Exposed:<br>69.7 (7.03)<br>Non-exposed:<br>68.8 (7.9) | TCDD<br><br>Blood<br><br>Lipid adjusted          | Mean (SD) (pg/g fat)<br><br><u>Current:</u><br>Factory A<br>-Exposed: 3.3 (7.7)<br>-Non-exposed: 1.2 (5.4)<br>Factory B<br>- Non-exposed: 0.4 (5.1)<br><br><u>Back-extrapolated to the time of last exposure using a one-compartment first order kinetic model with a TCDD half-life of</u> | <b>Serum immunoglobulin (IgG, IgM, IgA, IgD, IgE) and complement factors (C3, C4)</b><br><br>Borderline significant negative association were observed between current and predicted TCDD levels and C4 complement ( $\beta=-0.02$ ; 95% CI=-0.04-0.01; $\beta=-0.02$ ; 95% CI=-0.03-0.00, respectively).<br><br>Occurrence of eczema significantly associated with current TCDD levels.<br><br>Risk of bias tier: 2 |

| Reference<br>Trial or Study name<br>(Geography)                                                                                                                                                    | Study Type<br>Duration                                      | Participants in the study<br>Sex<br>Age at outcome assessment (years)<br>Year of tissue sampling                                                                           | Compounds<br>Measurement of exposure             | Levels of exposure                                                                                                                                                                                                                                                                                                    | Parameters measured and Measures of effect<br>Risk of bias tier                                                                                                                                                                                                                                                                                                                                                                               |
|----------------------------------------------------------------------------------------------------------------------------------------------------------------------------------------------------|-------------------------------------------------------------|----------------------------------------------------------------------------------------------------------------------------------------------------------------------------|--------------------------------------------------|-----------------------------------------------------------------------------------------------------------------------------------------------------------------------------------------------------------------------------------------------------------------------------------------------------------------------|-----------------------------------------------------------------------------------------------------------------------------------------------------------------------------------------------------------------------------------------------------------------------------------------------------------------------------------------------------------------------------------------------------------------------------------------------|
|                                                                                                                                                                                                    |                                                             | Factory B:<br>59.2 (9.1)<br><br>Tissue sampling:<br>approx 35 years<br>after last exposure                                                                                 |                                                  | <u>7.1 years:</u><br>Factory A<br>- Exposed: 81.9 (35.6)<br>- Non-exposed: 8.9 (26.6)<br>Factory B<br>- Non exposed: 0.4 (5.1)                                                                                                                                                                                        |                                                                                                                                                                                                                                                                                                                                                                                                                                               |
| <b>Saberi Hosnijeh et al. (2012).</b> Changes in lymphocyte subsets in workers exposed to 2,3,7,8-tetrachlorodibenzo- <i>p</i> -dioxin (TCDD).<br><br>Dutch herbicide cohort (The Netherlands)     | Cross-sectional<br><br>Followed up until 31st December 2006 | 85<br><br>M<br><br>Age (SD) at study:<br>High exposed: 69.07 (7.45)<br>Low exposed: 68.55 (7.93)<br><br>Tissue sampling:<br>approximately 35 years after the last exposure | TCDD<br><br>Blood (plasma)<br><br>Lipid adjusted | Mean (SD) (pg/g fat)<br><br><u>Current:</u><br>High exposed: 3.25 (7.43)<br>Low exposed: 1.07 (6.42)<br><br><u>Back-extrapolated to the time of last exposure (using a one-compartment first order kinetic model with a TCDD half-life of 7.1 years):</u><br>High exposed: 79.82 (33.28)<br>Low exposed: 7.53 (32.14) | <b>Haematological parameters (white and red blood cells number and proportion, granulocytes, monocytes, platelets, haemoglobin concentration and haematocrit)</b><br><br>Cell counts and lymphocyte subsets were similar between high- and low-exposed workers and increase in CD4/CD8 ratio in high-exposed workers.<br><br>Most lymphocyte subsets, especially B-cells, showed a decrease with increasing TCDD.<br><br>Risk of bias tier: 2 |
| <b>Saberi Hosnijeh et al. (2013).</b> Circulating soluble CD27 and CD30 in workers exposed to 2,3,7,8-Tetrachlorodibenzo- <i>p</i> -dioxin (TCDD).<br><br>Dutch herbicide cohort (The Netherlands) | Cross-sectional<br><br>n/a                                  | 85<br><br>M<br><br>Age at study:<br>High exposed: 69.07 (7.45)<br>Low exposed: 68.55 (7.93)                                                                                | TCDD<br><br>Blood (plasma)<br><br>Lipid adjusted | Mean (SD) (pg/g fat)<br><br><u>Current:</u><br>High exposed: 3.25 (7.43)<br>Low exposed: 1.07 (6.42)<br><br><u>Back-extrapolated to the time of last exposure (using a one-compartment first order kinetic model with a TCDD half-life of</u>                                                                         | <b>sCD27, sCD30 and IL1RA blood markers</b><br><br>Dose-response showed no significant association between blood levels of sCD27/30 and TCDD levels at time of last exposure.<br><br>IL1RA showed borderline significant decrease with increasing plasma TCDD.<br><br>Risk of bias tier: 2                                                                                                                                                    |

| Reference                                                                                                                                                                                                                                                | Study Type                                                                                                       | Participants in the study                                                                                                          | Compounds                                                            | Levels of exposure                                                                                          | Parameters measured and Measures of effect                                                                                                                                                                                                                                                                                                                                                                                                                                                      |
|----------------------------------------------------------------------------------------------------------------------------------------------------------------------------------------------------------------------------------------------------------|------------------------------------------------------------------------------------------------------------------|------------------------------------------------------------------------------------------------------------------------------------|----------------------------------------------------------------------|-------------------------------------------------------------------------------------------------------------|-------------------------------------------------------------------------------------------------------------------------------------------------------------------------------------------------------------------------------------------------------------------------------------------------------------------------------------------------------------------------------------------------------------------------------------------------------------------------------------------------|
| Trial or Study name (Geography)                                                                                                                                                                                                                          | Duration                                                                                                         | Sex<br><br>Age at outcome assessment (years)<br><br>Year of tissue sampling                                                        | Measurement of exposure                                              |                                                                                                             | Risk of bias tier                                                                                                                                                                                                                                                                                                                                                                                                                                                                               |
|                                                                                                                                                                                                                                                          |                                                                                                                  | Tissue sampling: approximately 35 years after the last exposure                                                                    |                                                                      | 7.1 years):<br>High exposed:79.82 (33.28)<br>Low exposed:7.53 (32.14)                                       |                                                                                                                                                                                                                                                                                                                                                                                                                                                                                                 |
| <b>Nakamoto et al. (2013).</b> Association between blood levels of PCDDs/PCDFs/dioxin-like PCBs and history of allergic and other diseases in the Japanese population.<br><br>n/a (Japan)                                                                | Cross-sectional<br><br>8 years duration                                                                          | 2,264<br><br>M, F<br><br>Age at first exposure: unknown<br><br>Mean age (SD):<br>M: 43.5 (13.6)<br>F: 45.3 (14.0)<br><br>2002–2010 | 17 PCDD/Fs<br>12 DL-PCBs<br><br>Blood<br><br>Lipid adjusted          | Percentiles (pg WHO <sub>2005</sub> -TEQ/g fat)<br><br>5%: 4.8<br>25%: 9.7<br>50%: 16<br>75%: 25<br>95%: 45 | <b>Asthma, Atopic dermatitis, Allergic rhinitis,</b><br><br>TEQs of PCDD/Fs and total PCDD/Fs and DL-PCBs showed a significant inverse dose-response relationships with atopic dermatitis (after adjustment).<br><br>Risk of bias tier: 2                                                                                                                                                                                                                                                       |
| <b>Croes et al. (2014).</b> Monitoring chlorinated persistent organic pollutants in adolescents in Flanders (Belgium): Concentrations, trends and dose-effect relationships (FLEHS II).<br><br>Flemish Environment and Health Study (FLEHS II) (Belgium) | Cross-sectional<br><br>Duration: 2008-2009: reference group<br>2010: region Genk-Zuid<br>2010-2011: region Menen | 200<br><br>M, F<br><br>Age at outcome assessment: 13.6–17.0<br><br>2008–2011                                                       | CALUX determined BEQ levels<br><br>Blood serum<br><br>Lipid adjusted | Geometric mean (pg BEQ/g fat)<br><br>PCDD/Fs:<br>108 (101, 114)<br><br>DL-PCBs:<br>32.1 (30.1, 34.2)        | <b>Allergy</b><br><br>DL-PCBs observed to be positively associated with the development of animal allergy (p=0.02, OR=1.46)<br><br>A borderline non-significant correlation of DL-PCBs with development of hay fever (p=0.11, OR=1.23 after correction for age, active smoking and familial history of hay fever) and with eczema (p=0.10, OR=0.73, after correction for age, active smoking and familial history of eczema) were noted.<br><br>Higher levels of PCDD/Fs were associated with a |

| Reference                                                                                                                                                                                | Study Type                 | Participants in the study                                                                           | Compounds                                                                             | Levels of exposure                                                                                                                            | Parameters measured and Measures of effect                                                                                                                                                                                                                                                                                     |
|------------------------------------------------------------------------------------------------------------------------------------------------------------------------------------------|----------------------------|-----------------------------------------------------------------------------------------------------|---------------------------------------------------------------------------------------|-----------------------------------------------------------------------------------------------------------------------------------------------|--------------------------------------------------------------------------------------------------------------------------------------------------------------------------------------------------------------------------------------------------------------------------------------------------------------------------------|
| Trial or Study name (Geography)                                                                                                                                                          | Duration                   | Sex<br><br>Age at outcome assessment (years)<br><br>Year of tissue sampling                         | Measurement of exposure                                                               |                                                                                                                                               | Risk of bias tier                                                                                                                                                                                                                                                                                                              |
|                                                                                                                                                                                          |                            |                                                                                                     |                                                                                       |                                                                                                                                               | higher risk for development of animal allergy ( $p=0.03$ , $OR=1.60$ after Ln transformation) and asthma ( $p=0.0004$ , $OR=1.42$ ).<br><br>The percentage thrombocytes in the blood was negatively associated with DL-PCBs ( $p=0.02$ ) and PCDD/Fs ( $p=0.0005$ ).<br><br>Risk of bias tier: 2                               |
| <b>Dinse et al. (2016).</b> Associations Between Selected Xenobiotics and Antinuclear Antibodies in the National Health and Nutrition Examination Survey, 1999-2004.<br><br>NHANES (USA) | Cross-sectional<br><br>n/a | 4,340<br><br>M, F<br><br>Age at outcome assessment: 12-55+<br><br>1999-2004                         | 17 PCDD/Fs, 9 DL-PCBs<br><br>Blood (serum)<br><br>Lipid adjusted                      | Individual concentrations reported in table 2 of the study                                                                                    | <b>Antinuclear antibodies (ANA)</b><br><br>No associations with autoantibodies were noted.<br><br>Risk of bias tier: 1                                                                                                                                                                                                         |
| <b>STUDIES ON EXPOSURE DURING DEVELOPMENT</b>                                                                                                                                            |                            |                                                                                                     |                                                                                       |                                                                                                                                               |                                                                                                                                                                                                                                                                                                                                |
| <b>Nagayama et al. (1998).</b> Postnatal exposure to chlorinated dioxins and related chemicals on lymphocyte subsets in Japanese breast-fed infants.<br><br>Japan                        | Cross-sectional<br><br>n/a | 36<br><br>M, F<br><br>Age at outcome assessment: 1 year old<br><br>Year of human milk sampling: not | 17 PCDD/Fs, DL-PCBs (congeners not specified)<br><br>Human milk<br><br>Lipid adjusted | Mean (min, max) (pg TEQ/g)<br><br>27.1 (15.2, 48.5)<br><br>Estimated total TEQ intake via human milk:<br><br>Mean (range): 34 (6-84) ng/kg bw | <b>Lymphocytes (CD3, CD4, CD8, CD16, CD20, HLA-DR)</b><br><br>Total TEQ intake from human milk was observed to be positively correlated with the % of CD4+ T cells ( $p=0.079$ ), and negatively correlated with those of CD8+ T cells ( $p=0.072$ ), hence a tendency to increase CD4/CD8 ratios.<br><br>Risk of bias tier: 2 |

| Reference<br>Trial or Study name<br>(Geography)                                                                                                                                                         | Study Type<br>Duration      | Participants in the study<br>Sex<br>Age at outcome assessment (years)<br>Year of tissue sampling                                             | Compounds<br>Measurement of exposure                              | Levels of exposure                                                                                                                                                                                                                                                                                                                                                                                           | Parameters measured and Measures of effect<br>Risk of bias tier                                                                                                                                                                                                                                                                                                                                                                                                                                                                                                                                                                                                                                                                                                                                                                                                                                                                                                                                                                                         |
|---------------------------------------------------------------------------------------------------------------------------------------------------------------------------------------------------------|-----------------------------|----------------------------------------------------------------------------------------------------------------------------------------------|-------------------------------------------------------------------|--------------------------------------------------------------------------------------------------------------------------------------------------------------------------------------------------------------------------------------------------------------------------------------------------------------------------------------------------------------------------------------------------------------|---------------------------------------------------------------------------------------------------------------------------------------------------------------------------------------------------------------------------------------------------------------------------------------------------------------------------------------------------------------------------------------------------------------------------------------------------------------------------------------------------------------------------------------------------------------------------------------------------------------------------------------------------------------------------------------------------------------------------------------------------------------------------------------------------------------------------------------------------------------------------------------------------------------------------------------------------------------------------------------------------------------------------------------------------------|
| <b>Weisglas-Kuperus et al. (2000).</b> Immunologic effects of background exposure to polychlorinated biphenyls and dioxins in Dutch preschool children.<br><br>Dutch PCB/Dioxin Study (The Netherlands) | Cohort<br>42 months         | reported<br>175 (health questionnaire)<br><br>85 (immunological markers)<br><br>M, F<br><br>Age at outcome assessment: 42 months<br><br>1990 | 17 PCDD/Fs,<br>12 DL-PCBs<br><br>Human milk<br><br>Lipid adjusted | Median (min-max)<br>pg WHO <sub>1998</sub> -TEQ/g fat<br><br><u>Non-ortho PCBs</u><br>Questionnaire (n= 81):<br>14.9 (4.4–45.7)<br>Immuno marker (n= 30): 17.1 (5.9–45.7)<br><br><u>Mono-ortho PCBs</u><br>Questionnaire (n= 85):<br>14.0 (3.2–44.4)<br>Immuno marker (n= 30): 14.0 (6.4–25.45)<br><br><u>PCDD/Fs</u><br>Questionnaire (n=71):<br>35.8 (10.2–87.2)<br>Immuno marker (n=24): 35.1 (15.6–66.6) | <b>Infectious diseases</b> (Middle-ear infections, Recurrent middle-ear infections, Pneumonia, Scarlatina, Chicken pox , Other infectious diseases, Hospital admissions for infectious diseases), <b>allergic diseases</b> (Eczema, Allergic reaction, Asthma or bronchitis, Coughing, chest congestion, or phlegm lasting for 10 days or more), <b>Attacks of shortness of breath with wheeze</b><br><br>Associations with antibody levels were observed for the NDL-PCBs in blood. PCDD/Fs and DL-PCBs were not examined in blood (.).<br><br>Dioxins and DL-PCBs were measured in milk but do not show a relation with the levels of antibodies or illnesses investigated in this study (breast-fed infants were accidentally underrepresented in this subgroup).<br><br>At 18 months of age the number of CD8+ (cytotoxic) and TcR αβ+ T cells correlated best with the PCDD/F-TEQ levels, while at 42 months of age there was no significant relation with the PCDD/Fs-TEQ levels (Pearson correlation 0.11 and 0.16).<br><br>Risk of bias tier: 1 |
| <b>Van Den Heuvel et al. (2002).</b> Immunologic biomarkers in relation to exposure markers of                                                                                                          | Cross-sectional<br>18 years | 200                                                                                                                                          | CALUX determined BEQ levels                                       | Geometric mean (95% CI) (pg BEQ/g fat)<br><br><u>Girls:</u>                                                                                                                                                                                                                                                                                                                                                  | <b>IgG, IgA, IgM, IgE, RAST, eosinophil count, reported allergies</b><br><br>Negative association of eosinophils, natural killer cells,                                                                                                                                                                                                                                                                                                                                                                                                                                                                                                                                                                                                                                                                                                                                                                                                                                                                                                                 |

| Reference<br>Trial or Study name<br>(Geography)                                                                                                             | Study Type<br>Duration                                                                                                            | Participants in the study<br>Sex<br>Age at outcome assessment (years)<br>Year of tissue sampling | Compounds<br>Measurement of exposure                                                   | Levels of exposure                                                                                                                                                             | Parameters measured and Measures of effect<br>Risk of bias tier                                                                                                                                                                                                                                                                                                                                                                                                            |
|-------------------------------------------------------------------------------------------------------------------------------------------------------------|-----------------------------------------------------------------------------------------------------------------------------------|--------------------------------------------------------------------------------------------------|----------------------------------------------------------------------------------------|--------------------------------------------------------------------------------------------------------------------------------------------------------------------------------|----------------------------------------------------------------------------------------------------------------------------------------------------------------------------------------------------------------------------------------------------------------------------------------------------------------------------------------------------------------------------------------------------------------------------------------------------------------------------|
| PCBs and Dioxins in Flemish adolescents (Belgium).<br>Environment and Health Study (Belgium)                                                                |                                                                                                                                   | M (n=80), F (n=120)<br>Age at outcome assessment: 17–18<br>1999                                  | Blood<br>Lipid adjusted                                                                | 28.59 (24.93–32.80)<br><u>Boys:</u><br>34.89 (28.66–42.46)<br><i>p</i> -value: 0.09                                                                                            | specific IgE, and reported allergies. Increase IgA.<br>Risk of bias tier: 1                                                                                                                                                                                                                                                                                                                                                                                                |
| <b>Nagayama et al. (2007b).</b> Immunologic effects of perinatal exposure to dioxins, PCBs and organochlorine pesticides in Japanese infants<br>n/a (Japan) | Cohort<br>10 months                                                                                                               | 92 infants<br>M, F<br>Mean age at outcome assessment: 10.1 months<br>1994–1996                   | 17 PCDD/Fs, 3 DL-PCBs (congeners not specified)<br>Human milk<br>Lipid adjusted        | Median (min, max) (pg WHO <sub>1998</sub> -TEQ/g fat)<br>23 (3.4, 49)                                                                                                          | <b>Lymphocyte subsets (CD16+, HLA-DR+, CD4+, CD4+8+, CD8+, CD3+ and CD20+ cells)</b><br>Significant increased in ratio CD4/CD8 cells and percentage of CD3 cells, but clinical relevance unclear.<br>Risk of bias tier: 1                                                                                                                                                                                                                                                  |
| <b>Leijds et al. (2009).</b> Effects of Dioxins, PCBs, and PBDEs on immunology and hematology in adolescents.<br>Amsterdam/Zaandam cohort (The Netherlands) | Cohort<br>Birth cohort followed-up in childhood and adolescents.<br>Duration of follow-up: mean (range) age at follow-up: 15 (14- | 33<br>M, F<br>Mean (range) age at outcome assessment: 15 (14–18.7) years.<br>1987–1991           | 17 PCDD/Fs, 3 DL-PCBs (-77, -126, -169)<br>Blood (serum), human milk<br>Lipid adjusted | Mean (range) (pg I-TEQ/g fat)<br>Prenatal exposure: 32.6 (9.05–88.8)<br>Lactational exposure: I-TEQ (ng): 66.9 (4.34–279)<br>Current serum (pg WHO <sub>2005</sub> -TEQ/g fat) | <b>Haematological and immunological parameters in serum/blood: Thrombocytes, Haemoglobin, Thrombopoietin, HbA1C, Leukocytes, Polymorphic neutrophils, Lymphocytes, Monocytes, Eosinophils, Basophils.</b><br>Negative effect on polymorphic neutrophils found in adolescents with higher current DL-PCB levels ( <i>p</i> =0.021). In the neonatal period this negative effect was seen with prenatal PCDD/F exposure.<br>No relationship observed between neutrophils and |



| Reference<br>Trial or Study name<br>(Geography)                                                                                                                                                          | Study Type<br>Duration            | Participants in the study<br>Sex<br>Age at outcome assessment (years)<br>Year of tissue sampling                 | Compounds<br>Measurement of exposure                                                      | Levels of exposure                                                                                                                                                                  | Parameters measured and Measures of effect<br>Risk of bias tier                                                                                                                                                                                                                                                                                                                                                                                                                                                                            |
|----------------------------------------------------------------------------------------------------------------------------------------------------------------------------------------------------------|-----------------------------------|------------------------------------------------------------------------------------------------------------------|-------------------------------------------------------------------------------------------|-------------------------------------------------------------------------------------------------------------------------------------------------------------------------------------|--------------------------------------------------------------------------------------------------------------------------------------------------------------------------------------------------------------------------------------------------------------------------------------------------------------------------------------------------------------------------------------------------------------------------------------------------------------------------------------------------------------------------------------------|
|                                                                                                                                                                                                          | 18.7) years                       |                                                                                                                  |                                                                                           | PCDD/Fs: 2.2 (0.4–6.1)<br>DL-PCBs: 2.2 (0.04–7.8)                                                                                                                                   | perinatal or current dioxins levels in serum.<br><br>Risk of bias tier: 2                                                                                                                                                                                                                                                                                                                                                                                                                                                                  |
| <b>Miyashita et al. (2011).</b> Effects of prenatal exposure to dioxin-like compounds on allergies and infections during infancy.<br><br>Hokkaido Study on Environment and Children's Health (Japan)     | Cohort study<br>3 years duration  | 364<br>M, F<br><br>Mothers age at delivery: 31±4.5 years<br><br>Gestational age: 39.5±1.5 weeks<br><br>2002–2005 | 17 PCDD/Fs<br>4 DL-PCBs (-77, -81, -126, -169)<br><br>Blood (serum)<br><br>Lipid adjusted | Median (min, max)<br>(pg WHO <sub>2005</sub> -TEQ/g fat)<br><br>Total TEQs:<br>13.89 (3.17, 43.35)<br><br>PCDDs-TEQs:<br>6.92 (1.65, 29.32)<br><br>PCDFs-TEQs:<br>2.38 (0.64, 7.77) | <b>Food allergy, eczema, asthma, otitis media</b><br><br>After adjustment for confounders, relatively higher levels of PCDFs were associated with a significantly increased risk of otitis media, especially among male infants (OR=2.5, 95% CI 1.1–5.9).<br><br>In addition, relatively higher levels of 23478-PeCDF were associated with significantly increased risk of otitis media (OR=5.3, 95% CI 1.5–19).<br><br>Weak association between dioxin-like compound levels and allergic symptoms in infancy.<br><br>Risk of bias tier: 1 |
| <b>Stolevik et al. (2011).</b> Prenatal exposure to polychlorinated biphenyls and dioxins is associated with increased risk of wheeze and infections in infants.<br><br>BraMat (MoBa sub-cohort, Norway) | Cohort study<br>Follow-up: 1 year | 195<br>M, F<br><br>Age at outcome assessment: 1<br><br>2007                                                      | 17 PCDD/Fs, 12 DL-PCBs<br><br>Validated FFQ (MoBa Cohort)                                 | Dietary intake<br>(pg WHO <sub>2005</sub> -TEQ/kg bw/day)<br><br>Median (min, max)<br>0.58 (0.15, 3.07)<br><br>IQR: 0.45–0.81<br><br>80th percentile: 0.90                          | <b>Wheeze, otitis media, gastric flu, chicken pox, upper respiratory tract infection (URTI), Exanthema subitum</b><br><br>Prenatal exposure to PCDD/Fs and DL-PCBs was associated with increased risk of wheeze and exanthema subitum, and also with increased frequency of upper respiratory tract infections.<br><br><b>Eczema:</b> Increased prenatal exposure to PCDD/Fs and DL-PCBs lowered the risk of eczema or itchiness in bivariate logistic regression analyses when the                                                        |

| Reference                                                                                                                                                                                                                                                          | Study Type                                           | Participants in the study                                                                                                   | Compounds                                                                                           | Levels of exposure                                                                                                                                                                                  | Parameters measured and Measures of effect                                                                                                                                                                                                                                                                                                                                                                                                                                                                                                                                                                                                             |
|--------------------------------------------------------------------------------------------------------------------------------------------------------------------------------------------------------------------------------------------------------------------|------------------------------------------------------|-----------------------------------------------------------------------------------------------------------------------------|-----------------------------------------------------------------------------------------------------|-----------------------------------------------------------------------------------------------------------------------------------------------------------------------------------------------------|--------------------------------------------------------------------------------------------------------------------------------------------------------------------------------------------------------------------------------------------------------------------------------------------------------------------------------------------------------------------------------------------------------------------------------------------------------------------------------------------------------------------------------------------------------------------------------------------------------------------------------------------------------|
| Trial or Study name (Geography)                                                                                                                                                                                                                                    | Duration                                             | Sex<br><br>Age at outcome assessment (years)<br><br>Year of tissue sampling                                                 | Measurement of exposure                                                                             |                                                                                                                                                                                                     | Risk of bias tier                                                                                                                                                                                                                                                                                                                                                                                                                                                                                                                                                                                                                                      |
|                                                                                                                                                                                                                                                                    |                                                      |                                                                                                                             |                                                                                                     |                                                                                                                                                                                                     | <p>levels of exposure were categorized using the tertiles. When adjusted for maternal BMI in the final models, associations were not significant:<br/>           1<sup>st</sup> vs 2<sup>nd</sup> tertile: 0.49 (0.20–1.22) 0.127<br/>           1<sup>st</sup> vs 3<sup>rd</sup> tertile: 0.76 (0.32–1.78) 0.521</p> <p>Risk of bias tier: 2</p>                                                                                                                                                                                                                                                                                                      |
| <p><b>Stolevik et al. (2013).</b><br/>           Prenatal exposure to polychlorinated biphenyls and dioxins from the maternal diet may be associated with immunosuppressive effects that persist into early childhood.</p> <p>BraMat (MoBa sub-cohort, Norway)</p> | <p>Cohort study<br/>           3 years follow-up</p> | <p>180<br/>           M, F<br/>           Mean (range) age at outcome assessment: 36 (33–43) months<br/>           2007</p> | <p>17 PCDD/Fs<br/>           12 DL-PCBs<br/>           Maternal dietary intake by validated FFQ</p> | <p>Maternal dietary intake during pregnancy (pg WHO<sub>2005</sub>-TEQ/kg bw/day)</p> <p>Median (min-max): 0.59 (0.15–3.07).<br/>           IQR: 0.46–0.81<br/>           80th percentile: 0.89</p> | <p><b>Antibody responses to four vaccines: attenuated measles, rubella, tetanus toxoid, <i>Haemophilus influenzae</i> type b (Hib)</b></p> <p>Maternal dietary exposure to PCBs/dioxins was associated with increased risk of wheeze and URTI.</p> <p>Maternal dietary exposure to PCBs/dioxins was associated with reduced antibody response to measles vaccine.</p> <p>Positive association of antibody responses to vaccination to measles with maternal dietary exposure were observed. No effects on immunophenotypes, allergic sensitisation and vaccine-induced antibody response to other vaccines were noted.</p> <p>Risk of bias tier: 2</p> |

n/a: not applicable.

### A.8.9. Studies on effects on the nervous system

**Table 73.** Epidemiological studies on the association between exposure to PCDD/Fs and DL-PCBs and effects on the **nervous system**. Details about the risk of bias appraisal can be found in **Annex A.9.9**.

| Reference                                                                                                                                                                                                                                       | Study type                                | Participants in the study                                                                                 | Compounds                                                                                            | Levels of exposure                                                                                                                                                                                        | Parameters measured and Measures of effect                                                                                                                                                                                                                                                                                                                                                                                                                                           |
|-------------------------------------------------------------------------------------------------------------------------------------------------------------------------------------------------------------------------------------------------|-------------------------------------------|-----------------------------------------------------------------------------------------------------------|------------------------------------------------------------------------------------------------------|-----------------------------------------------------------------------------------------------------------------------------------------------------------------------------------------------------------|--------------------------------------------------------------------------------------------------------------------------------------------------------------------------------------------------------------------------------------------------------------------------------------------------------------------------------------------------------------------------------------------------------------------------------------------------------------------------------------|
| Trial or Study name (Geography)                                                                                                                                                                                                                 | Duration                                  | Sex (M/F)<br><br>Age at outcome assessment<br><br>Year of tissue sampling                                 | Measurement of exposure                                                                              |                                                                                                                                                                                                           | Risk of bias tier                                                                                                                                                                                                                                                                                                                                                                                                                                                                    |
| <b>NEURODEVELOPMENT IN CHILDREN</b>                                                                                                                                                                                                             |                                           |                                                                                                           |                                                                                                      |                                                                                                                                                                                                           |                                                                                                                                                                                                                                                                                                                                                                                                                                                                                      |
| <b>Lanting et al. (1998).</b><br>Neurological condition in 42-month-old children in relation to pre- and postnatal exposure to polychlorinated biphenyls and dioxins.<br><br>Dutch PCB/dioxin cohort (Rotterdam and Groningen, The Netherlands) | Cohorts<br><br>1990-1992                  | 170 with PCDD/Fs,<br>186 with DL-PCBs<br><br>M, F<br><br>Age at outcome assessment: 42 months<br><br>1990 | 17 PCDD/Fs,<br>6 DL-PCBs (PCB-77, -126, -169, -105, -118, -156)<br><br>Lipid adjusted                | Median (p5, p95) (ng TEQ/kg fat)<br><br>PCDD/Fs:<br>28.8 (14.9, 51.5)<br><br>No- <i>ortho</i> PCBs:<br>14.5 (6.8, 31.9)<br><br>Mono- <i>ortho</i> PCBs:<br>14.2 (6.9, 24.8)<br><br>* TEF scheme not clear | <b>Neurological Examination</b> focused on observation of <b>motor function</b> (prehension, sitting, crawling, standing, walking) in free-field situation, leading to clinical diagnosis 'normal', 'mildly abnormal', 'abnormal'.<br><b>Neurological optimality score.</b> Quality of movements evaluated separately as a <b>fluency cluster score</b> .<br><br>Exposure to PCDD/Fs and DL-PCBs was not found to be related to neurological conditions.<br><br>Risk of bias tier: 1 |
| <b>Patandin et al. (1999).</b><br>Effects of environmental exposure to polychlorinated biphenyls and dioxins on cognitive abilities in Dutch children at 42 months of age<br><br>Dutch PCB/dioxin cohort (Rotterdam, The Netherlands)           | Cohort<br><br>Age at follow up: 42 months | 209 breastfed<br><br>M, F<br><br>Age at outcome assessment: 42 months<br><br>1990-1992                    | 17 PCDD/Fs,<br>6 DL-PCBs (-77, -126, -169, -105, -118, -156)<br><br>Human milk<br><br>Lipid adjusted | WHO <sub>1998</sub> -TEQ (PCDD/Fs+DL-PCBs) (ng/kg fat)<br><br>Median (P5, P95)<br><br>Mono- <i>ortho</i> PCBs (n=195):<br>14.2 (6.8, 24.8)                                                                | <b>Cognitive abilities, measured by the Dutch version of Kaufman Assessment Battery for Children (K-ABC), yielding the sequential scale and the simultaneous processing scale, and a combined score of these.</b><br><br><b>Verbal comprehension measured by the Dutch version of the Reynell Developmental Language Scales (RDLS) in the Rotterdam branch of the cohort only.</b>                                                                                                   |

| Reference                                                                                                                                                                                           | Study type              | Participants in the study                                                          | Compounds                                                                                         | Levels of exposure                                                                                                                                                                                | Parameters measured and Measures of effect                                                                                                                                                                                                                                                                                                                                                                                                                                                                                                                                                                                                                                                                                                                                                                                                   |
|-----------------------------------------------------------------------------------------------------------------------------------------------------------------------------------------------------|-------------------------|------------------------------------------------------------------------------------|---------------------------------------------------------------------------------------------------|---------------------------------------------------------------------------------------------------------------------------------------------------------------------------------------------------|----------------------------------------------------------------------------------------------------------------------------------------------------------------------------------------------------------------------------------------------------------------------------------------------------------------------------------------------------------------------------------------------------------------------------------------------------------------------------------------------------------------------------------------------------------------------------------------------------------------------------------------------------------------------------------------------------------------------------------------------------------------------------------------------------------------------------------------------|
| Trial or Study name (Geography)                                                                                                                                                                     | Duration                | Sex (M/F)<br><br>Age at outcome assessment<br><br>Year of tissue sampling          | Measurement of exposure                                                                           |                                                                                                                                                                                                   | Risk of bias tier                                                                                                                                                                                                                                                                                                                                                                                                                                                                                                                                                                                                                                                                                                                                                                                                                            |
|                                                                                                                                                                                                     |                         |                                                                                    |                                                                                                   | Non-ortho PCBs (n=194): 14.5 (7.1, 31.7)<br><br>PCDD/Fs (n=176): 33.4 (17.0, 59.8)                                                                                                                | <b>Alls scores standardized to a mean of 100 and SD of 15.</b><br><br>No association between prenatal exposure and K-ABC or RDLC in covariate adjusted analyses. . Lactational exposure (calculated concentration in breast milk multiplied with duration of breast-feeding) was also not associated with the outcomes.<br><br>Risk of bias tier: 1                                                                                                                                                                                                                                                                                                                                                                                                                                                                                          |
| <b>Vreugdenhil et al. (2002).</b><br>Effects of perinatal exposure to PCBs and dioxins on play behavior in Dutch children at school age<br><br>Dutch PCB/dioxin cohort (Rotterdam, The Netherlands) | Cohort<br><br>1990–1992 | 105<br><br>53 M, 32 F<br><br>Age at outcome assessment: 7.5 (0.4)<br><br>1990–1992 | 17 PCDD/Fs, 6 DL-PCBs (-77, -126, -169, -105, -118, -156)<br><br>Human milk<br><br>Lipid adjusted | WHO <sub>1998</sub> -TEQ (PCDD/Fs+DL-PCBs) (ng/kg fat)<br><br>Median (range)<br><br>Total: 68.1 (27.7–135.2)<br><br>Breast-fed boys: 68.1 (27.7–135.2)<br><br>Breast-fed girls: 67.1 (28.1–108.9) | <b>Play behaviour (Dutch version of the Pre-School Activity Inventory, PSAI). Contains 24 questions that are answered by 5 points scales, addressing three aspects: i) Type of toys, ii) activities and iii) child characteristics. Gives a masculine, feminine and composite scale (feminine-masculine).</b><br><br>Higher In PCDD/F-TEQ was by adjusted linear regression associated with higher scores on the feminine scale in the total group of boys and girls (p=0.048), indicating more feminized play behavior in both sexes. No significant differences between boys and girls.<br><br>Of note sum of PCBs in milk was associated with masculine play behaviour, which is in opposite direction from the PCDD/F-TEQs.<br><br>Postnatal exposure (calculated as [concentration of PCDD/Fs and DL-PCBs (TEQ) in milk] × [duration of |

| Reference                                                                                                                                                                                                                                                                           | Study type                     | Participants in the study                                                                        | Compounds                                                                              | Levels of exposure                                                                                                                                        | Parameters measured and Measures of effect                                                                                                                                                                                                                                                                                                                            |
|-------------------------------------------------------------------------------------------------------------------------------------------------------------------------------------------------------------------------------------------------------------------------------------|--------------------------------|--------------------------------------------------------------------------------------------------|----------------------------------------------------------------------------------------|-----------------------------------------------------------------------------------------------------------------------------------------------------------|-----------------------------------------------------------------------------------------------------------------------------------------------------------------------------------------------------------------------------------------------------------------------------------------------------------------------------------------------------------------------|
| Trial or Study name (Geography)                                                                                                                                                                                                                                                     | Duration                       | Sex (M/F)<br><br>Age at outcome assessment<br><br>Year of tissue sampling                        | Measurement of exposure                                                                |                                                                                                                                                           | Risk of bias tier                                                                                                                                                                                                                                                                                                                                                     |
|                                                                                                                                                                                                                                                                                     |                                |                                                                                                  |                                                                                        |                                                                                                                                                           | breastfeeding]) not related to play behavior in the total breast fed group or in boys and girls separately.<br><br>Risk of bias tier: 1<br><br><i>Comment:</i> Limited power because of small n.                                                                                                                                                                      |
| <b>Nakajima et al. (2006).</b><br>Effects of prenatal exposure to polychlorinated biphenyls and dioxins on mental and motor development in Japanese children at 6 months of age.<br><br>Hokkaido Study on Environment and Children's Health (Japan, Sapporo)                        | Cohort<br><br>6 months         | 134<br><br>M, F<br><br>2002–2004                                                                 | 17 PCDD/Fs,<br>12 DL-PCBs<br><br>Maternal blood (serum)<br><br>Lipid adjusted          | pg WHO <sub>1998</sub> -TEQ/g fat<br><br>Mean:<br>Total TEQ: 18.8<br>PCDD-TEQ: 7.7<br>PCDF-TEQ: 4.2<br>DL-PCB-TEQ: 6.9                                    | <b>Mental developmental index (MDI) and Psychomotor developmental index (PDI) with the Bayley Scale of Infant Development II, translated to Japan.</b><br><br>After adjustment for potential confounding variables, total TEQ, PCDD/F-TEQ or DL-PCB-TEQ not associated with MDI or PDI.<br><br>Risk of bias tier: 1                                                   |
| <b>Wilhelm et al. (2008).</b> The Duisburg birth cohort study: Influence of the prenatal exposure to PCDD/Fs and dioxin-like PCBs on thyroid hormone status in newborns and neurodevelopment of infants until the age of 24 months<br><br>Duisburg cohort study (Duisburg, Germany) | Cross-sectional<br><br>2 years | 182<br><br>M, F<br><br>Age at outcome assessment: 2 weeks, 12, 18 and 24 months<br><br>2000–2002 | 17 PCDD/Fs, 12 DL-PCBs<br><br>Maternal blood (serum), human milk<br><br>Lipid adjusted | pg WHO <sub>2005</sub> -TEQ/g fat<br><br>Median (min, max)<br><br>Blood (n=182):<br>19.33 (3.77, 58.36)<br><br>Human milk (n=149):<br>19.67 (2.62, 52.37) | <b>Neurological optimal score (NOS) at 14 days (postural tone, reflexes), and 18 months (spontaneous motor behaviour). Psycomotor and cognitive development at 12 and 24 months by Bayley Scale of Infant Development (BSID II).</b><br><br>No associations between maternal (prenatal) exposure to total TEQs and NOS or BSID was found.<br><br>Risk of bias tier: 1 |
| <b>Haldorsson et al. (2009).</b><br>Dioxin-like activity in plasma                                                                                                                                                                                                                  | Cohort                         | 77 with outcome                                                                                  | CALUX determined BEQ                                                                   | pg BEQs/g fat                                                                                                                                             | <b>Infant developmental milestones at 6 months</b>                                                                                                                                                                                                                                                                                                                    |

| Reference<br>Trial or Study name<br>(Geography)                                                                                                                                                 | Study type<br>Duration  | Participants in the study<br>Sex (M/F)<br>Age at outcome assessment<br>Year of tissue sampling | Compounds<br>Measurement of exposure                                | Levels of exposure                                                                                                                                              | Parameters measured and Measures of effect<br>Risk of bias tier                                                                                                                                                                                                                                                                                                                                                                                                                                                                                                                                                                                                         |
|-------------------------------------------------------------------------------------------------------------------------------------------------------------------------------------------------|-------------------------|------------------------------------------------------------------------------------------------|---------------------------------------------------------------------|-----------------------------------------------------------------------------------------------------------------------------------------------------------------|-------------------------------------------------------------------------------------------------------------------------------------------------------------------------------------------------------------------------------------------------------------------------------------------------------------------------------------------------------------------------------------------------------------------------------------------------------------------------------------------------------------------------------------------------------------------------------------------------------------------------------------------------------------------------|
| among Danish pregnant women: dietary predictors, birth weight and infant development.<br><br>Danish National Birth Cohort (Denmark)                                                             | n/a                     | M, F<br><br>Age at outcome assessment: 5.7 and 7 months<br><br>1996–2002                       | levels<br><br>Maternal blood<br><br>Lipid adjusted                  | Geometric mean: 46.0.<br><br>5-perc, 50-perc, 95-perc, 7.0, 38.2, 134.6                                                                                         | Among four milestones on motor development and two on non-motor development, only "Cannot crawl" was associated, adj. OR (95% CI) 3.01 (1.05, 8.61). Also the combined score on motor development was significantly associated (adj. OR 4.72 (1.05, 21.2).<br><br>Risk of bias tier: 2<br><br><i>Comment: Authors state that bioassay results must be interpreted with care, may be confounded by PAHs since exposure was associated with high fat/meat consumption.</i>                                                                                                                                                                                                |
| <b>Sioen et al. (2013).</b> Prenatal exposure top environmental contaminants and behavioural problems at age 7-8 years.<br><br>Flemish Environment and Health Study FLEHS I (Belgium, Flanders) | Cohort<br><br>7–8 years | 270<br><br>M, F<br><br>Age at outcome assessment: 7-8<br><br>2002–2006                         | CALUX determined BEQ levels<br><br>Cord blood<br><br>Lipid adjusted | Median (P25, P75) (pg BEQs/g fat)<br><br>All (n=270):<br>24.4 (12.3, 37.6)<br><br>Boys (n=130):<br>25.2 (13.2, 43.2)<br><br>Girls (n=140):<br>24.1 (11.9, 33.5) | <b>Parent reported behavioural problems (Strenghts and Difficulties Questionnaire, SDQ)</b><br><br>No significant associations between cord blood BEQ considered as continuous variables and abnormal SDQ values at age 7–8 years in children.<br><br>When exposure was analysed in tertiles, there was statistically significantly (p=0.016) lower OR in highest vs lowest tertile for high hyperactivity score (OR, 95%CI: 0.493, 0.164-0.727). This finding was opposite of the research hypothesis.<br><br>Risk of bias tier: 1<br><br><i>Note: The LOD for BEQ was higher than the P25 in cord blood, weakening the conclusions based on analysis in tertiles.</i> |

| Reference                                                                                                                                                                                                                                           | Study type                     | Participants in the study                                                                        | Compounds                                                                           | Levels of exposure                                                                                                                          | Parameters measured and Measures of effect                                                                                                                                                                                                                                                                                                                                                                                                                                                                                                                                                                                                                                                                                                                                                                                                                                                                                                                                                                                                                                                                                                                                                                                                                                                  |  |                  |                 |                        |  |  |                       |                    |      |                        |                     |      |                           |  |      |                      |                    |      |                       |                      |      |                 |  |      |                       |  |  |                       |                   |      |                        |                     |      |                 |  |      |
|-----------------------------------------------------------------------------------------------------------------------------------------------------------------------------------------------------------------------------------------------------|--------------------------------|--------------------------------------------------------------------------------------------------|-------------------------------------------------------------------------------------|---------------------------------------------------------------------------------------------------------------------------------------------|---------------------------------------------------------------------------------------------------------------------------------------------------------------------------------------------------------------------------------------------------------------------------------------------------------------------------------------------------------------------------------------------------------------------------------------------------------------------------------------------------------------------------------------------------------------------------------------------------------------------------------------------------------------------------------------------------------------------------------------------------------------------------------------------------------------------------------------------------------------------------------------------------------------------------------------------------------------------------------------------------------------------------------------------------------------------------------------------------------------------------------------------------------------------------------------------------------------------------------------------------------------------------------------------|--|------------------|-----------------|------------------------|--|--|-----------------------|--------------------|------|------------------------|---------------------|------|---------------------------|--|------|----------------------|--------------------|------|-----------------------|----------------------|------|-----------------|--|------|-----------------------|--|--|-----------------------|-------------------|------|------------------------|---------------------|------|-----------------|--|------|
| Trial or Study name (Geography)                                                                                                                                                                                                                     | Duration                       | Sex (M/F)<br><br>Age at outcome assessment<br><br>Year of tissue sampling                        | Measurement of exposure                                                             |                                                                                                                                             | Risk of bias tier                                                                                                                                                                                                                                                                                                                                                                                                                                                                                                                                                                                                                                                                                                                                                                                                                                                                                                                                                                                                                                                                                                                                                                                                                                                                           |  |                  |                 |                        |  |  |                       |                    |      |                        |                     |      |                           |  |      |                      |                    |      |                       |                      |      |                 |  |      |                       |  |  |                       |                   |      |                        |                     |      |                 |  |      |
| <p><b>Winneke et al. (2014).</b><br/>Behavioral Sexual Dimorphism in School-Age Children and Early Developmental Exposure to Dioxins and PCBs: A Follow-Up Study of the Duisburg Cohort.</p> <p>Duisburg birth cohort study (Germany, Duisburg)</p> | <p>Cohort</p> <p>6-8 years</p> | <p>121</p> <p>(61 M, 60 F)</p> <p>Children's age mean (SD): 6.6 (0.5) years</p> <p>2000–2002</p> | <p>17 PCDD/Fs, 12 DL-PCBs,</p> <p>Maternal blood and milk</p> <p>Lipid adjusted</p> | <p>(pg WHO<sub>2005</sub>-TEQ/g fat)</p> <p>Blood (n=118)<br/>mean (SD)<br/>21.5 (9.6)</p> <p>Milk (n=101)<br/>Mean (SD)<br/>20.5 (9.1)</p> | <p><b>Pre-School Activities Inventory (PSAI) grouped into three categories: preferred toys, preferred activities and behaviour characteristics. Used to derive feminine, masculine, and difference (feminine – masculine) scores</b></p> <p>Log<sub>2</sub>-transformed TEQ-weighted sum (PCDD/Fs+DL-PCBs,)</p> <table> <thead> <tr> <th></th> <th><math>\beta</math> (95% CI)</th> <th><i>p</i>-Value</th> </tr> </thead> <tbody> <tr> <td colspan="3"><b>Masculine score</b></td> </tr> <tr> <td>Maternal blood, boys:</td> <td>2.48 (-0.58, 5.51)</td> <td>0.11</td> </tr> <tr> <td>Maternal blood, girls:</td> <td>-1.72 (-3.81, 0.37)</td> <td>0.11</td> </tr> <tr> <td>Sex × exposure from milk:</td> <td></td> <td>0.19</td> </tr> <tr> <td>Maternal milk, boys:</td> <td>2.88 (-0.59, 6.35)</td> <td>0.10</td> </tr> <tr> <td>Maternal milk, girls:</td> <td>-2.59 (-5.16, -0.02)</td> <td>0.05</td> </tr> <tr> <td>Sex × exposure:</td> <td></td> <td>0.02</td> </tr> <tr> <td colspan="3"><b>Feminine score</b></td> </tr> <tr> <td>Maternal blood, boys:</td> <td>2.62 (0.52, 4.71)</td> <td>0.02</td> </tr> <tr> <td>Maternal blood, girls:</td> <td>-2.20 (-4.69, 0.29)</td> <td>0.08</td> </tr> <tr> <td>Sex × exposure:</td> <td></td> <td>0.06</td> </tr> </tbody> </table> |  | $\beta$ (95% CI) | <i>p</i> -Value | <b>Masculine score</b> |  |  | Maternal blood, boys: | 2.48 (-0.58, 5.51) | 0.11 | Maternal blood, girls: | -1.72 (-3.81, 0.37) | 0.11 | Sex × exposure from milk: |  | 0.19 | Maternal milk, boys: | 2.88 (-0.59, 6.35) | 0.10 | Maternal milk, girls: | -2.59 (-5.16, -0.02) | 0.05 | Sex × exposure: |  | 0.02 | <b>Feminine score</b> |  |  | Maternal blood, boys: | 2.62 (0.52, 4.71) | 0.02 | Maternal blood, girls: | -2.20 (-4.69, 0.29) | 0.08 | Sex × exposure: |  | 0.06 |
|                                                                                                                                                                                                                                                     | $\beta$ (95% CI)               | <i>p</i> -Value                                                                                  |                                                                                     |                                                                                                                                             |                                                                                                                                                                                                                                                                                                                                                                                                                                                                                                                                                                                                                                                                                                                                                                                                                                                                                                                                                                                                                                                                                                                                                                                                                                                                                             |  |                  |                 |                        |  |  |                       |                    |      |                        |                     |      |                           |  |      |                      |                    |      |                       |                      |      |                 |  |      |                       |  |  |                       |                   |      |                        |                     |      |                 |  |      |
| <b>Masculine score</b>                                                                                                                                                                                                                              |                                |                                                                                                  |                                                                                     |                                                                                                                                             |                                                                                                                                                                                                                                                                                                                                                                                                                                                                                                                                                                                                                                                                                                                                                                                                                                                                                                                                                                                                                                                                                                                                                                                                                                                                                             |  |                  |                 |                        |  |  |                       |                    |      |                        |                     |      |                           |  |      |                      |                    |      |                       |                      |      |                 |  |      |                       |  |  |                       |                   |      |                        |                     |      |                 |  |      |
| Maternal blood, boys:                                                                                                                                                                                                                               | 2.48 (-0.58, 5.51)             | 0.11                                                                                             |                                                                                     |                                                                                                                                             |                                                                                                                                                                                                                                                                                                                                                                                                                                                                                                                                                                                                                                                                                                                                                                                                                                                                                                                                                                                                                                                                                                                                                                                                                                                                                             |  |                  |                 |                        |  |  |                       |                    |      |                        |                     |      |                           |  |      |                      |                    |      |                       |                      |      |                 |  |      |                       |  |  |                       |                   |      |                        |                     |      |                 |  |      |
| Maternal blood, girls:                                                                                                                                                                                                                              | -1.72 (-3.81, 0.37)            | 0.11                                                                                             |                                                                                     |                                                                                                                                             |                                                                                                                                                                                                                                                                                                                                                                                                                                                                                                                                                                                                                                                                                                                                                                                                                                                                                                                                                                                                                                                                                                                                                                                                                                                                                             |  |                  |                 |                        |  |  |                       |                    |      |                        |                     |      |                           |  |      |                      |                    |      |                       |                      |      |                 |  |      |                       |  |  |                       |                   |      |                        |                     |      |                 |  |      |
| Sex × exposure from milk:                                                                                                                                                                                                                           |                                | 0.19                                                                                             |                                                                                     |                                                                                                                                             |                                                                                                                                                                                                                                                                                                                                                                                                                                                                                                                                                                                                                                                                                                                                                                                                                                                                                                                                                                                                                                                                                                                                                                                                                                                                                             |  |                  |                 |                        |  |  |                       |                    |      |                        |                     |      |                           |  |      |                      |                    |      |                       |                      |      |                 |  |      |                       |  |  |                       |                   |      |                        |                     |      |                 |  |      |
| Maternal milk, boys:                                                                                                                                                                                                                                | 2.88 (-0.59, 6.35)             | 0.10                                                                                             |                                                                                     |                                                                                                                                             |                                                                                                                                                                                                                                                                                                                                                                                                                                                                                                                                                                                                                                                                                                                                                                                                                                                                                                                                                                                                                                                                                                                                                                                                                                                                                             |  |                  |                 |                        |  |  |                       |                    |      |                        |                     |      |                           |  |      |                      |                    |      |                       |                      |      |                 |  |      |                       |  |  |                       |                   |      |                        |                     |      |                 |  |      |
| Maternal milk, girls:                                                                                                                                                                                                                               | -2.59 (-5.16, -0.02)           | 0.05                                                                                             |                                                                                     |                                                                                                                                             |                                                                                                                                                                                                                                                                                                                                                                                                                                                                                                                                                                                                                                                                                                                                                                                                                                                                                                                                                                                                                                                                                                                                                                                                                                                                                             |  |                  |                 |                        |  |  |                       |                    |      |                        |                     |      |                           |  |      |                      |                    |      |                       |                      |      |                 |  |      |                       |  |  |                       |                   |      |                        |                     |      |                 |  |      |
| Sex × exposure:                                                                                                                                                                                                                                     |                                | 0.02                                                                                             |                                                                                     |                                                                                                                                             |                                                                                                                                                                                                                                                                                                                                                                                                                                                                                                                                                                                                                                                                                                                                                                                                                                                                                                                                                                                                                                                                                                                                                                                                                                                                                             |  |                  |                 |                        |  |  |                       |                    |      |                        |                     |      |                           |  |      |                      |                    |      |                       |                      |      |                 |  |      |                       |  |  |                       |                   |      |                        |                     |      |                 |  |      |
| <b>Feminine score</b>                                                                                                                                                                                                                               |                                |                                                                                                  |                                                                                     |                                                                                                                                             |                                                                                                                                                                                                                                                                                                                                                                                                                                                                                                                                                                                                                                                                                                                                                                                                                                                                                                                                                                                                                                                                                                                                                                                                                                                                                             |  |                  |                 |                        |  |  |                       |                    |      |                        |                     |      |                           |  |      |                      |                    |      |                       |                      |      |                 |  |      |                       |  |  |                       |                   |      |                        |                     |      |                 |  |      |
| Maternal blood, boys:                                                                                                                                                                                                                               | 2.62 (0.52, 4.71)              | 0.02                                                                                             |                                                                                     |                                                                                                                                             |                                                                                                                                                                                                                                                                                                                                                                                                                                                                                                                                                                                                                                                                                                                                                                                                                                                                                                                                                                                                                                                                                                                                                                                                                                                                                             |  |                  |                 |                        |  |  |                       |                    |      |                        |                     |      |                           |  |      |                      |                    |      |                       |                      |      |                 |  |      |                       |  |  |                       |                   |      |                        |                     |      |                 |  |      |
| Maternal blood, girls:                                                                                                                                                                                                                              | -2.20 (-4.69, 0.29)            | 0.08                                                                                             |                                                                                     |                                                                                                                                             |                                                                                                                                                                                                                                                                                                                                                                                                                                                                                                                                                                                                                                                                                                                                                                                                                                                                                                                                                                                                                                                                                                                                                                                                                                                                                             |  |                  |                 |                        |  |  |                       |                    |      |                        |                     |      |                           |  |      |                      |                    |      |                       |                      |      |                 |  |      |                       |  |  |                       |                   |      |                        |                     |      |                 |  |      |
| Sex × exposure:                                                                                                                                                                                                                                     |                                | 0.06                                                                                             |                                                                                     |                                                                                                                                             |                                                                                                                                                                                                                                                                                                                                                                                                                                                                                                                                                                                                                                                                                                                                                                                                                                                                                                                                                                                                                                                                                                                                                                                                                                                                                             |  |                  |                 |                        |  |  |                       |                    |      |                        |                     |      |                           |  |      |                      |                    |      |                       |                      |      |                 |  |      |                       |  |  |                       |                   |      |                        |                     |      |                 |  |      |



| Reference                                                                                                                                                                                                                                          | Study type                       | Participants in the study                                                                                                  | Compounds                                                             | Levels of exposure                                                                                              | Parameters measured and Measures of effect                                                                                                                                                                                                                                                                                                                                                                                                                                                                                                                                                        |
|----------------------------------------------------------------------------------------------------------------------------------------------------------------------------------------------------------------------------------------------------|----------------------------------|----------------------------------------------------------------------------------------------------------------------------|-----------------------------------------------------------------------|-----------------------------------------------------------------------------------------------------------------|---------------------------------------------------------------------------------------------------------------------------------------------------------------------------------------------------------------------------------------------------------------------------------------------------------------------------------------------------------------------------------------------------------------------------------------------------------------------------------------------------------------------------------------------------------------------------------------------------|
| Trial or Study name (Geography)                                                                                                                                                                                                                    | Duration                         | Sex (M/F)<br><br>Age at outcome assessment<br><br>Year of tissue sampling                                                  | Measurement of exposure                                               |                                                                                                                 | Risk of bias tier                                                                                                                                                                                                                                                                                                                                                                                                                                                                                                                                                                                 |
|                                                                                                                                                                                                                                                    |                                  |                                                                                                                            |                                                                       |                                                                                                                 | Maternal milk, boys: 3.90 (1.74, 6.06)<br><0.01<br>Maternal milk, girls: -4.22 (-7.24, -1.19)<br>0.01<br>Sex × exposure:<br><0.01<br><br>Similar results for PCDD/F-TEQ.<br><br>Risk of bias tier: 1<br><br><i>Comments: Relative small sample size, but robust associations still detected. PSAI developed for pre-school children, but subjects were &gt;6 years old. Questions raised as to whether PSAI fully reflects behavioural aspects of sexual dimorphism.</i>                                                                                                                          |
| <b>Nowack et al. (2015).</b><br>Influence of Low-Level Prenatal Exposure to PCDD/Fs and PCBs on Empathizing, Systemizing and Autistic Traits: Results from the Duisburg Birth Cohort Study.<br><br>Duisburg birth cohort study (Germany, Duisburg) | Cohort<br><br>10 years follow-up | 116<br><br>M, F<br><br>Age at completion of EQ-SR: 8-11 years<br><br>Age at completion of SRS: 9-12 years<br><br>2000-2002 | 17 PCDD/Fs,<br>12 DL-PCBs<br><br>Maternal blood<br><br>Lipid adjusted | Total TEQs (pg WHO <sub>2005</sub> -TEQ/g fat )<br><br>Median: 19.85<br>Geom mean: 20.10<br>95% CI: 18.31-21.91 | <b>Gender-specific cognitive style assessed by parent reported Empathy-Systemizing Quotient (ESQ) questionnaire. Autistic traits assessed by parent reported Social Responsive Scale (SRS) questionnaire (giving a total score and five subscales). Higher score indicates more severe deficits.</b><br><br>Less impairment with increasing exposure was reported.<br><br>Significant (p<0.05) negative associations between PCDD/F TEQ in maternal blood and SRS total scores in whole group (β, 95% CI) =-6.66, -11.88, -1.44). Similar results for PCDD/Fs+dl-PCB TEQ, but not significant for |

| Reference                                                                                                                                                                                                                                 | Study type                                   | Participants in the study                                                 | Compounds                                                                                       | Levels of exposure                                                                                            | Parameters measured and Measures of effect                                                                                                                                                                                                                                                                                                                                                                                                                                                                                                                                                                                                                                                                                                                                                                                                                                   |
|-------------------------------------------------------------------------------------------------------------------------------------------------------------------------------------------------------------------------------------------|----------------------------------------------|---------------------------------------------------------------------------|-------------------------------------------------------------------------------------------------|---------------------------------------------------------------------------------------------------------------|------------------------------------------------------------------------------------------------------------------------------------------------------------------------------------------------------------------------------------------------------------------------------------------------------------------------------------------------------------------------------------------------------------------------------------------------------------------------------------------------------------------------------------------------------------------------------------------------------------------------------------------------------------------------------------------------------------------------------------------------------------------------------------------------------------------------------------------------------------------------------|
| Trial or Study name (Geography)                                                                                                                                                                                                           | Duration                                     | Sex (M/F)<br><br>Age at outcome assessment<br><br>Year of tissue sampling | Measurement of exposure                                                                         |                                                                                                               | Risk of bias tier                                                                                                                                                                                                                                                                                                                                                                                                                                                                                                                                                                                                                                                                                                                                                                                                                                                            |
|                                                                                                                                                                                                                                           |                                              |                                                                           |                                                                                                 |                                                                                                               | <p>dl-PCB TEQ alone.</p> <p>Significant interaction sex * exposure. Significant negative association between total TEQ and total SRS score in girls alone (<math>\beta=-11.21</math> (95% CI -19.86, -2.57)), in several SRS subscales in girls and in one SRS subscale in boys.</p> <p>No association between exposure levels and sex-typical behaviour.</p> <p>Risk of bias tier: 1</p> <p><i>Comments: Cohort was 231 mother-child pairs. 136 and 133 mothers invited to follow up, not described how selected. 73-75% loss to follow up of the invited, possible selection bias. Parent reported child's behaviour. Sample might not be representative of general population. Parents were informed of their exposure levels at an early stage, which might have influenced parenting behaviour. Regression on SRS scores included 41 boys and 39 girls (low n).</i></p> |
| <p><b>Neugebauer et al. (2015).</b><br/>The influence of low level pre- and perinatal exposure to PCDD/Fs, PCBs, and lead on attention performance and attention-related behavior among German school-aged children: Results from the</p> | <p>Cohort</p> <p>Follow-up: 8 or 9 years</p> | <p>117</p> <p>M, F</p> <p>KITAP:<br/>8.5±0.30 years</p> <p>FBB-ADHS</p>   | <p>17 PCDD/Fs,<br/>12 DL-PCBs</p> <p>Maternal blood<br/>Maternal milk</p> <p>Lipid adjusted</p> | <p>(pg WHO<sub>2005</sub>-TEQ/g fat)</p> <p>Median blood PCDD/F-TEQ: 12.99</p> <p>Median DL PCB-TEQ: 6.64</p> | <p><b>Computerized test battery for attention performance in children (KITAP): distractibility, alertness, flexibility, divided attention, go/no go, divided attention, flexibility.</b></p> <p><b>Parent rating scale for attention-deficit hyperactivity disorder (FBB-ADHS): inattention, hyperactivity, impulsivity, overall ADHD.</b></p>                                                                                                                                                                                                                                                                                                                                                                                                                                                                                                                               |

| Reference                                                                                                                                                                                                     | Study type                                                   | Participants in the study                                                                    | Compounds                                                                                                                          | Levels of exposure                                                                                                                         | Parameters measured and Measures of effect                                                                                                                                                                                                                                                                                                                                                                                                                                                                                                                                                                                                                                                                                                                                                |
|---------------------------------------------------------------------------------------------------------------------------------------------------------------------------------------------------------------|--------------------------------------------------------------|----------------------------------------------------------------------------------------------|------------------------------------------------------------------------------------------------------------------------------------|--------------------------------------------------------------------------------------------------------------------------------------------|-------------------------------------------------------------------------------------------------------------------------------------------------------------------------------------------------------------------------------------------------------------------------------------------------------------------------------------------------------------------------------------------------------------------------------------------------------------------------------------------------------------------------------------------------------------------------------------------------------------------------------------------------------------------------------------------------------------------------------------------------------------------------------------------|
| Trial or Study name (Geography)                                                                                                                                                                               | Duration                                                     | Sex (M/F)<br><br>Age at outcome assessment<br><br>Year of tissue sampling                    | Measurement of exposure                                                                                                            |                                                                                                                                            | Risk of bias tier                                                                                                                                                                                                                                                                                                                                                                                                                                                                                                                                                                                                                                                                                                                                                                         |
| Duisburg Birth Cohort Study.<br><br>Duisburg Birth Cohort Study (Germany, Duisburg)                                                                                                                           |                                                              | questionnaire:<br>9.5±0.40 years<br><br>2000                                                 |                                                                                                                                    |                                                                                                                                            | <p>Increasing maternal blood PCDD/F TEQ and PCB TEQ significantly (<math>p &lt; 0.05</math>) associated with more omission errors in the subtest Divided Attention (47% and 42%; 95% CI 1.08–2.00 and 1.07–1.89, respectively). Small and non-significant associations in other KITAP subtests</p> <p>Reduction in hyperactivity scale (gMR 0.86; 95% CI 0.78–0.95) and on overall ADHD scale (gMR: 0.90; 95% CI 0.82–0.99) with increasing maternal blood PCB TEQ.</p> <p>Risk of bias tier: 2</p> <p><i>Comments: Low n. 50% loss to follow up, similar exposure in participants and non-participants, but possible selection bias. Parents were informed of their exposure levels at an early stage. Intercorrelation between compounds moderate to high. KITAP not validated.</i></p> |
| <b>Caspersen et al. (2016a).</b><br>Maternal dietary exposure to dioxins and polychlorinated biphenyls (PCBs) is associated with language delay in 3 year old Norwegian children.<br><br>MoBa Cohort (Norway) | Cohort<br><br>Ongoing duration/ 3 years follow up from birth | 44,092<br><br>M, F<br><br>Children: mean age of 37 months for language test<br><br>1999–2008 | 17 PCDD/Fs, 12 DL-PCBs<br><br>FFQ during gestational week 22<br><br>See Caspersen et al 2013. Dietary exposure to dioxins and PCBs | Maternal dietary exposure generally low: 98% of women had intakes of PCDD/Fs and DL-PCBs $\leq 14$ pg WHO <sub>2005</sub> -TEQ/kg bw/week. | <p><b>Grammar complexity measured with grammar rating. Receptive/expressive communication skills assessed by ages and stages questionnaire (ASQ).</b></p> <p>High maternal exposure (<math>&gt;14</math> pg WHO<sub>2005</sub>-TEQ/kg bw/week) associated with higher odds of incomplete grammar (boys/girls: OR=1.1) and severe language delay in girls (OR=2.9, 95% CI 1.4-5.9).</p> <p>High maternal exposure also associated with moderate language delay (OR=1.4, 95% CI 1.0-2.0) and ASQ</p>                                                                                                                                                                                                                                                                                        |

| Reference                                                                                                                                                                                                                                | Study type              | Participants in the study                                                 | Compounds                                                                                                                                                                                                                                   | Levels of exposure                                                                                                                        | Parameters measured and Measures of effect                                                                                                                                                                                                                                                                                                                                                                                                                                                                                                                                                                                                                                                                                                                               |
|------------------------------------------------------------------------------------------------------------------------------------------------------------------------------------------------------------------------------------------|-------------------------|---------------------------------------------------------------------------|---------------------------------------------------------------------------------------------------------------------------------------------------------------------------------------------------------------------------------------------|-------------------------------------------------------------------------------------------------------------------------------------------|--------------------------------------------------------------------------------------------------------------------------------------------------------------------------------------------------------------------------------------------------------------------------------------------------------------------------------------------------------------------------------------------------------------------------------------------------------------------------------------------------------------------------------------------------------------------------------------------------------------------------------------------------------------------------------------------------------------------------------------------------------------------------|
| Trial or Study name (Geography)                                                                                                                                                                                                          | Duration                | Sex (M/F)<br><br>Age at outcome assessment<br><br>Year of tissue sampling | Measurement of exposure                                                                                                                                                                                                                     |                                                                                                                                           | Risk of bias tier                                                                                                                                                                                                                                                                                                                                                                                                                                                                                                                                                                                                                                                                                                                                                        |
|                                                                                                                                                                                                                                          |                         |                                                                           | in a large cohort of pregnant women: results from the Norwegian Mother and Child Cohort Study (MoBa).                                                                                                                                       |                                                                                                                                           | (OR=1.4, 95% CI 1.1-1.9) in girls.<br><br>Risk of bias tier: 2<br><br><i>Comments: General limitations of assessing dietary intake using FFQ. Adjusted for dietary mercury exposure.</i>                                                                                                                                                                                                                                                                                                                                                                                                                                                                                                                                                                                 |
| <b>Caspersen et al. (2016b).</b><br>The influence of maternal dietary exposure to dioxins and PCBs during pregnancy on ADHD symptoms and cognitive functions in Norwegian preschool children.<br><br>ADHD Study (MoBa subcohort, Norway) | Cohort<br><br>3.5 years | 1,024<br><br>Age at outcome assessment: 3.5<br><br>2007–2011              | 17 PCDD/Fs, 12 DL-PCBs<br><br>FFQ during gestational week 22<br><br>See Caspersen et al. (2013). Dietary exposure to dioxins and PCBs in a large cohort of pregnant women: results from the Norwegian Mother and Child Cohort Study (MoBa). | Maternal dietary exposure generally low: 98% of women had intakes of PCDD/Fs and DL-PCBs $\leq$ 14 pg WHO <sub>2005</sub> -TEQ/kg bw/week | <b>ADHD symptoms and cognitive functioning in pre-schoolers (IQ, expressive language, and executive functions)</b><br><br>Maternal dietary exposure to PCDD/Fs and DL-PCBs was not significantly associated with any of the outcome measures when analyses were performed for boys and girls together.<br><br>After stratifying by sex, adjusted analyses indicated a small inverse association with language in girls (1 SD increase in exposure was associated with a reduction in language score of -0.2 [CI -0.5, -0.1]) but not in boys. The difference between sex-specific associations was not statistically significant (p-value=0.13). No sex-specific effects were observed for ADHD-symptoms, IQ scores, or executive functions.<br><br>Risk of bias tier: 2 |
| <b>Nakajima et al. (2017).</b><br>Sex-specific differences in                                                                                                                                                                            | Cohort                  | 190 children at 6 months of                                               | 17 PCDD/Fs, 12 DL-PCBs                                                                                                                                                                                                                      | Median (P25, P75) (pg WHO <sub>2005</sub> -TEQ/g fat)                                                                                     | <b>Bayley's scale of infant development (BSID-II) expressed by Mental developmental indeces (MDI)</b>                                                                                                                                                                                                                                                                                                                                                                                                                                                                                                                                                                                                                                                                    |

| Reference                                                                                                                                                                                                                                        | Study type           | Participants in the study                                                                                | Compounds                                                      | Levels of exposure                                                      | Parameters measured and Measures of effect                                                                                                                                                                                                                                                                                                                                                                                                          |
|--------------------------------------------------------------------------------------------------------------------------------------------------------------------------------------------------------------------------------------------------|----------------------|----------------------------------------------------------------------------------------------------------|----------------------------------------------------------------|-------------------------------------------------------------------------|-----------------------------------------------------------------------------------------------------------------------------------------------------------------------------------------------------------------------------------------------------------------------------------------------------------------------------------------------------------------------------------------------------------------------------------------------------|
| Trial or Study name (Geography)                                                                                                                                                                                                                  | Duration             | Sex (M/F)<br><br>Age at outcome assessment<br><br>Year of tissue sampling                                | Measurement of exposure                                        |                                                                         | Risk of bias tier                                                                                                                                                                                                                                                                                                                                                                                                                                   |
| effect of prenatal exposure to dioxin-like compounds on neurodevelopment in Japanese children: Sapporo cohort study. Sapporo Cohort (part of the Hokkaido Study on Environment and Children's Health) (Japan, Sapporo)                           |                      | age, 121 children at 18 months of age<br><br>Age at outcome assessment: 6 and 18 months<br><br>2002–2005 | Mother's blood<br>Lipid adjusted                               | 15.1 (11.2, 19.6) in mothers of the 18 months olds (n=121)              | <b>and psychomotor developmental indices (PDI).</b> MDI and PDI were not significantly associated with maternal total TEQ or PCDD/F-TEQ at 6 or 18 months in boys or girls. Breast feeding duration (mean 10.9 months) was not taken into consideration. Mean score on MDI (82.2) and PDI (85.2) was lower than the standardized 100. Maternal intellectual performance was not taken into consideration at 6 months.<br><br>Risk of bias tier: 2   |
| <b>Ikeno et al. (2018).</b> Effects of low-level prenatal exposure to dioxins on cognitive development in Japanese children at 42months<br><br>Sapporo Cohort (part of the Hokkaido Study on Environment and Children's Health) (Japan, Sapporo) | Cohort (prospective) | 141 mother-child pairs<br><br>Age at outcome assessment: 42 months<br><br>2002–2005                      | 17 PCDD/Fs, 12 DL-PCBs<br><br>Mother's blood<br>Lipid adjusted | Median (P25, P75) (pg WHO <sub>2005</sub> -TEQ/g fat) 15.1 (11.0, 20.3) | <b>Cognitive development at 42 months with Kaufman Assessment of Battery for Children (K-ABC). Mental processing scale (MPCS) and a scale measuring acquired knowledge and application of skills (AS) were used.</b><br><br>No negative associations between maternal prenatal PCDD/Fs and DL-PCBs TEQ and the outcomes.<br><br>Positive association between total TEQ and AS in girls (B: 30.33, 95% CI 12.95, 47.72).<br><br>Risk of bias tier: 1 |
| <b>Hui et al. (2016).</b> Prenatal dioxin exposure and neurocognitive development in Hong Kong 11-year-old children                                                                                                                              | Cohort (prospective) | 161<br><br>Age at outcome assessment: 11 years                                                           | CALUX determined BEQs<br><br>Human milk<br>Lipid adjusted      | Mean (SD), IQR (pg BEQ/g fat) 14.9 (76.0), 10.9-18.7 (n=128)            | <b>Neurocognitive function in 11-year old children (Wechsler Intelligence Scale for Children-IV, the Hong Kong List Learning Test, the Tests for Everyday Attention for Children and the Grooved Pegboard Test)</b>                                                                                                                                                                                                                                 |

| Reference                                                                                                                                                                                                                                    | Study type                | Participants in the study                                                                                                                                        | Compounds                                            | Levels of exposure                                                                                                                                                                                | Parameters measured and Measures of effect                                                                                                                                                                                                                                                                                                                                                                                                                                                                                                                                                                                                                                                                                                            |
|----------------------------------------------------------------------------------------------------------------------------------------------------------------------------------------------------------------------------------------------|---------------------------|------------------------------------------------------------------------------------------------------------------------------------------------------------------|------------------------------------------------------|---------------------------------------------------------------------------------------------------------------------------------------------------------------------------------------------------|-------------------------------------------------------------------------------------------------------------------------------------------------------------------------------------------------------------------------------------------------------------------------------------------------------------------------------------------------------------------------------------------------------------------------------------------------------------------------------------------------------------------------------------------------------------------------------------------------------------------------------------------------------------------------------------------------------------------------------------------------------|
| Trial or Study name (Geography)                                                                                                                                                                                                              | Duration                  | Sex (M/F)<br><br>Age at outcome assessment<br><br>Year of tissue sampling                                                                                        | Measurement of exposure                              |                                                                                                                                                                                                   | Risk of bias tier                                                                                                                                                                                                                                                                                                                                                                                                                                                                                                                                                                                                                                                                                                                                     |
| n/a (Hong Kong, China)                                                                                                                                                                                                                       |                           | 2002                                                                                                                                                             |                                                      |                                                                                                                                                                                                   | BEQs in human milk was not significantly associated with measures of neurocognitive function in terms of full scale IQ, fine motor coordination, verbal and non-verbal reasoning, verbal learning and recall and attention at 11 years of age.<br><br>Risk of bias tier: 1                                                                                                                                                                                                                                                                                                                                                                                                                                                                            |
| <b>OCCUPATIONAL STUDIES</b>                                                                                                                                                                                                                  |                           |                                                                                                                                                                  |                                                      |                                                                                                                                                                                                   |                                                                                                                                                                                                                                                                                                                                                                                                                                                                                                                                                                                                                                                                                                                                                       |
| <b>Michalek et al. (2001b).</b><br>Serum dioxin and peripheral neuropathy in veterans of Operation Ranch Hand.<br><br>Air Force Health Study (AFHS, Operation Ranch Hand) (US Veterans that served in Southeast Asia during the Vietnam War) | Cohort<br><br>11–35 years | 2101<br><br>M<br><br>Age at exposure: 23.9–33.7<br><br>Age at outcome assessment (1997): 26–35 years older than at the time of exposure (1962–1971).<br><br>1982 | TCDD<br><br>Blood (serum)<br><br>No lipid adjustment | Comparison:<br>Non- Ranch Hand Air Force veterans<br><br>Ranch Hand Veterans in three levels:<br><br>Background:<br><10 pg/g fat<br><br>'Low':<br>>10–94 pg/g fat<br><br>'High':<br>> 94 pg/g fat | <b>Neurological status (1982, 1985, 1987, 1992, 1997), nerve conduction (1982), vibrotactile threshold (1992, 1997)</b><br><br>No change in the mean nerve conduction velocities or distal latencies.<br><br>No change in odds for vibrotactile abnormality<br><br>OR of symmetrical peripheral abnormality significantly increased in the high category in 1997 (OR=1.8, 95% CI 1.2–2.7) with a significant p for trend with increasing exposure.<br><br>OR of possible peripheral neuropathy significantly increased in the 'High' category in 1997 (OR=1.8, 95% CI 1.2–2.7) with a significant trend with increasing exposure.<br><br>OR of probable peripheral neuropathy increased with increasing exposure (significant p for trend) and showed |

| Reference                                                                                                                                                                                                                                      | Study type                | Participants in the study                                                                                                                        | Compounds                               | Levels of exposure                                                                                                                      | Parameters measured and Measures of effect                                                                                                                                                                                                                                                                                                                                                                                                                                                                                                                                                                                                                                           |
|------------------------------------------------------------------------------------------------------------------------------------------------------------------------------------------------------------------------------------------------|---------------------------|--------------------------------------------------------------------------------------------------------------------------------------------------|-----------------------------------------|-----------------------------------------------------------------------------------------------------------------------------------------|--------------------------------------------------------------------------------------------------------------------------------------------------------------------------------------------------------------------------------------------------------------------------------------------------------------------------------------------------------------------------------------------------------------------------------------------------------------------------------------------------------------------------------------------------------------------------------------------------------------------------------------------------------------------------------------|
| Trial or Study name (Geography)                                                                                                                                                                                                                | Duration                  | Sex (M/F)<br><br>Age at outcome assessment<br><br>Year of tissue sampling                                                                        | Measurement of exposure                 |                                                                                                                                         | Risk of bias tier                                                                                                                                                                                                                                                                                                                                                                                                                                                                                                                                                                                                                                                                    |
|                                                                                                                                                                                                                                                |                           |                                                                                                                                                  |                                         |                                                                                                                                         | <p>borderline significance in the 'High' category in 1992 (OR=2.5, 95% CI 0.9–6.6). The high category was significantly increased in 1997 (OR=5.0, 95% CI 2.2–11.2) and with significant p for trend with increasing exposure.</p> <p>OR of diagnosed peripheral neuropathy was significantly increased in the high category in 1992 (OR=4.9, 95% CI 1.5–15.3) and 1997 (OR 5.8, 95% CI 2.0–17.1) and with significant p for trend both years.</p> <p>Of note, it was a strong relation between diabetes and all the outcomes, as well a reported relation between dioxin and diabetes in Ranch Hand veterans, which complicate the interpretations.</p> <p>Risk of bias tier: 2</p> |
| <p><b>Barrett et al. (2001).</b> Serum dioxin and cognitive function among veterans of Operation Ranch Hand.</p> <p>Air Force Health Study (AFHS, Operation Ranch Hand) (US Veterans that served in Southeast Asia during the Vietnam War)</p> | Cohort<br><br>11–20 years | 1,989 (937 Ranch Hand veterans, 1,052 comparisons)<br><br>M<br><br>Age at outcome assessment:<br>Ranch Hand:<br>10.9–45.1<br>Comparison:<br>43.9 | TCDD<br><br>Blood<br><br>Lipid adjusted | TCDD (pg/g fat)<br><br>Median (range)<br><br>Comparison:<br>4.0 (0–10) in 1987 or 1992<br><br>Background:<br>5.7 (0–10) in 1987 or 1992 | <p><b>Cognitive functioning (Halstead-Reitan neuropsychological test battery, Wechsler adult intelligence scale-revised (WAIS-R), Wechsler memory scale (WMS) Form I, reading subtest of the wide range achievement test (WRAT))</b></p> <p>Overall, there were few significant differences, but Ranch Hand veterans in the 'High' category scored lower than the comparison veteran on the immediate recall trial (difference in mean score; 95%CI: -0.5; -0.91, -0.09, P=0.02) and the delayed recall trial (-0.42; -0.8, 0.03,</p>                                                                                                                                                |

| Reference                                                                                                                                                                                                       | Study type                                                                                     | Participants in the study                                                 | Compounds                                      | Levels of exposure                                                                                                                                                                                                                             | Parameters measured and Measures of effect                                                                                                                                                                                                                                                                                                                                                                                                                                                                                                                                                                                                                                                                                 |
|-----------------------------------------------------------------------------------------------------------------------------------------------------------------------------------------------------------------|------------------------------------------------------------------------------------------------|---------------------------------------------------------------------------|------------------------------------------------|------------------------------------------------------------------------------------------------------------------------------------------------------------------------------------------------------------------------------------------------|----------------------------------------------------------------------------------------------------------------------------------------------------------------------------------------------------------------------------------------------------------------------------------------------------------------------------------------------------------------------------------------------------------------------------------------------------------------------------------------------------------------------------------------------------------------------------------------------------------------------------------------------------------------------------------------------------------------------------|
| Trial or Study name (Geography)                                                                                                                                                                                 | Duration                                                                                       | Sex (M/F)<br><br>Age at outcome assessment<br><br>Year of tissue sampling | Measurement of exposure                        |                                                                                                                                                                                                                                                | Risk of bias tier                                                                                                                                                                                                                                                                                                                                                                                                                                                                                                                                                                                                                                                                                                          |
|                                                                                                                                                                                                                 |                                                                                                | 1987, 1992                                                                |                                                | <p>'Low', back-calculated*: 53.2 (27–94)</p> <p>'High', back-calculated*: 194.9 (94–3,920)</p> <p>* Initial TCDD levels at the end of last tour of duty calculated based on TCDD measured in 1987 and 1992 using a half-life of 8.7 years.</p> | <p>P=0.04) of the WMS logical memory test. These findings were consistent with findings from alternative analysis in quintiles of exposure of the combined cohorts of veterans and comparisons.</p> <p>The decrement was relatively small and of unknown clinical significance.</p> <p>Risk of bias tier: 2</p>                                                                                                                                                                                                                                                                                                                                                                                                            |
| <p><b>Pelclova et al. (2001).</b><br/>Biochemical, neuropsychological, and neurological abnormalities following 2,3,7,8-tetrachlorodibenzo-<i>p</i>-dioxin (TCDD) exposure.</p> <p>n/a (The Czech Republic)</p> | <p>Cross-sectional study</p> <p>About 30 years follow up in 1996</p> <p>Exposure 1965–1968</p> | <p>13</p> <p>M</p> <p>Average age at follow-up: 48–61</p> <p>1996</p>     | <p>TCDD</p> <p>Blood</p> <p>Lipid adjusted</p> | <p>Mean (range) in 1996 (pg/g fat)</p> <p>256 (14–760)</p> <p>Back-estimation at the time of exposure: approx 5,000</p>                                                                                                                        | <p><b>Neuropsychological variables (8 tests) and standard clinical neurological examination with 3 electrophysiological methods.</b></p> <p>Significant correlation between TCDD in 1996 and several neuropsychological variables. Normal neuropsychological findings in only two subjects that had low TCDD in blood (94 and 74 pg TCDD/g fat).</p> <p>Abnormal EEG in 7 subjects. Clinical polyneuropathic signs in 5 men. Electromyographic (EMG) results abnormal in 3 men. Frequency of polyneuropathic EMG was significantly decreased from 1970s (38%) to 1996 (23%). Since this parameter is expected to increase by aging, the decrease may be related to decreasing TCDD levels.</p> <p>Risk of bias tier: 2</p> |
| <b>Pelclova et al. (2002).</b> Lipid                                                                                                                                                                            | Cohort                                                                                         | 12                                                                        | TCDD                                           | Mean (range)                                                                                                                                                                                                                                   | <b>Neuropsychological variables (8 tests)</b>                                                                                                                                                                                                                                                                                                                                                                                                                                                                                                                                                                                                                                                                              |



| Reference<br>Trial or Study name<br>(Geography)                                                                                                                                                                                                          | Study type<br>Duration                                     | Participants in the study<br>Sex (M/F)<br>Age at outcome assessment<br>Year of tissue sampling        | Compounds<br>Measurement of exposure                                                           | Levels of exposure                                                                                                                                                                    | Parameters measured and Measures of effect<br>Risk of bias tier                                                                                                                                                                                                                                                                                                                                                                                                                                                            |
|----------------------------------------------------------------------------------------------------------------------------------------------------------------------------------------------------------------------------------------------------------|------------------------------------------------------------|-------------------------------------------------------------------------------------------------------|------------------------------------------------------------------------------------------------|---------------------------------------------------------------------------------------------------------------------------------------------------------------------------------------|----------------------------------------------------------------------------------------------------------------------------------------------------------------------------------------------------------------------------------------------------------------------------------------------------------------------------------------------------------------------------------------------------------------------------------------------------------------------------------------------------------------------------|
| metabolism and neuropsychological follow-up study of workers exposed to 2,3,7,8- tetrachlordibenzo- <i>p</i> -dioxin.<br><br>n/a (The Czech Republic)                                                                                                    | About 35 years follow up in 2001<br><br>Exposure 1965-1968 | M<br><br>Age at follow up: 35-61<br><br>1996                                                          | Blood ( <i>results taken from a previous study Pelclova et al 2001</i> )<br><br>Lipid adjusted | (pg/g fat)<br><br>256 (14–760)<br><br>Back-estimation at the time of exposure: approx 5,000                                                                                           | Correlations between neuropsychological variables and blood TCDD seen in 1996 had the same direction but were no longer statistically significant in 2001.<br><br>Normal findings (absence of organic psychosyndrome, organic psychosyndrome mild grade or pseudoneurasthenic syndrome) in three out of the 12 subjects.<br><br>According to the authors, no substantial changes were noticed in the subjects in comparison with the neuropsychological findings in 1996.<br><br>Risk of bias tier: 2                      |
| <b>Michalek et al. (2003).</b><br>Serum dioxin and psychological functioning in U.S. Air Force veterans of the Vietnam War<br><br>Air Force Health Study (AFHS, Operation Ranch Hand) (US Veterans that served in Southeast Asia during the Vietnam War) | Cohort<br><br>11-30 years                                  | 2122<br><br>M<br><br>Exposure in 1962-1971.<br><br>Mean age at outcome assessment: 51-55.<br><br>1982 | TCDD<br><br>Blood<br><br>No lipid adjustment                                                   | Comparison:<br>Non- Ranch Hand Air Force veterans.<br><br>For Ranch Hand veterans three levels:<br><br>Background:<br><10 pg/g<br><br>'Low':<br>10-94 pg/g<br><br>'High':<br>>94 pg/g | <b>Psychological assessment using self-administered questionnaires:</b> The Minnesota Mutiphasic Personality Inventory (MMPI) is used to evaluate personality status and emotional adjustment; the Million Clinical Multiaxial Inventory for basic personality characteristics and clinical disorders (MCMI)<br><br>There were few consistent psychological abnormalities associated with serum dioxin levels, and possibly related to the fear of possible health effects of dioxin exposure.<br><br>Risk of bias tier: 2 |

| Reference<br>Trial or Study name<br>(Geography)                                                                                                                                                       | Study type<br>Duration                                                             | Participants in the study<br>Sex (M/F)<br>Age at outcome assessment<br>Year of tissue sampling | Compounds<br>Measurement of exposure             | Levels of exposure                                                                   | Parameters measured and Measures of effect<br>Risk of bias tier                                                                                                                                                                                                                                                                                                                                                                                                                                                                                                                                                                                                          |
|-------------------------------------------------------------------------------------------------------------------------------------------------------------------------------------------------------|------------------------------------------------------------------------------------|------------------------------------------------------------------------------------------------|--------------------------------------------------|--------------------------------------------------------------------------------------|--------------------------------------------------------------------------------------------------------------------------------------------------------------------------------------------------------------------------------------------------------------------------------------------------------------------------------------------------------------------------------------------------------------------------------------------------------------------------------------------------------------------------------------------------------------------------------------------------------------------------------------------------------------------------|
| <b>Urban et al. (2007).</b><br>Neurological and neurophysiological examinations on workers with chronic poisoning by 2,3,7,8-TCDD: follow-up 35 years after exposure.<br><br>n/a (The Czech Republic) | Cohort<br><br>38-39 years follow up in 2003–2004<br><br>Exposure between 1965–1968 | 15<br><br>M<br><br>Mean age (SD) at outcome assessment in 2003–2004: 60 (3) years<br><br>1996  | TCDD<br><br>Blood (plasma)<br><br>Lipid adjusted | (pg/g fat)<br><br>Arithmetic mean: 128<br><br>Geometric mean: 78<br><br>Range: 7-380 | <b>Neurological examination through standardized clinical examination and 8 neuropsychological end-points</b><br><br><b>Neurological examination:</b> Clinical signs of polyneuropathy: 9 subjects. Mean TCDD in subjects with and without signs were 169 and 67 pg/g fat (P=0.08). No association with neurasthenic syndrome.<br><br><b>Neuropsychological examination (n=13):</b> Two variables (number of errors in the Category Test and the percentage of non-perseverative errors in the Wisconsin Card Sorting Test) and the frequency of abnormal neurophysiological tests in individual patients correlated with TCDD plasma level.<br><br>Risk of bias tier: 2 |
| <b>Pelclova et al. (2009).</b><br>Chronic health impairment due to 2,3,7,8-tetrachloro-dibenzo- <i>p</i> -dioxin exposure.<br><br>n/a (The Czech Republic)                                            | Cohort<br><br>44 years follow up<br><br>Exposure between 1965–1968                 | 11<br><br>M<br><br>Age (SD) at outcome assessment: 64.4 (1.5)<br><br>1996                      | TCDD<br><br>Blood (serum)<br><br>Lipid adjusted  | Mean (SD, range) (pg/g fat)<br><br>In 2008: 274.0 (181.2, 53–756)                    | <b>Neurological examination through standardised clinical examination, nerve conduction, brain perfusion and 8 neuropsychological endpoints</b><br><br>Four of 11 patients had normal neurological results.<br><br>No significant correlation between TCDD and neuropsychological status appeared in the 8 patients examined.<br><br>Risk of bias tier: 2                                                                                                                                                                                                                                                                                                                |

n/a: not applicable.

### A.8.10. Studies on effects on teeth and bone

**Table 74.** Epidemiological studies on the association between exposure to PCDD/Fs and DL-PCBs and **effects on teeth and bone**. Details about the risk of bias appraisal can be found in **Annex A.9.10**.

| Reference                                                                                                                                                                                    | Study type                                | Participants in the study                                                                                      | Compounds                                                                           | Levels of exposure                                                                                                                                                                                                   | Parameters measured and Measures of effect                                                                                                                                                                                                                                                                                                                                                                                                                                                 |
|----------------------------------------------------------------------------------------------------------------------------------------------------------------------------------------------|-------------------------------------------|----------------------------------------------------------------------------------------------------------------|-------------------------------------------------------------------------------------|----------------------------------------------------------------------------------------------------------------------------------------------------------------------------------------------------------------------|--------------------------------------------------------------------------------------------------------------------------------------------------------------------------------------------------------------------------------------------------------------------------------------------------------------------------------------------------------------------------------------------------------------------------------------------------------------------------------------------|
| Trial or study name (Geography)                                                                                                                                                              | Duration                                  | Sex<br><br>Age at outcome assessment (years)<br><br>Year of tissue sampling                                    | Measurement of exposure                                                             |                                                                                                                                                                                                                      | Risk of bias tier                                                                                                                                                                                                                                                                                                                                                                                                                                                                          |
| <b>EFFECTS ON TEETH</b>                                                                                                                                                                      |                                           |                                                                                                                |                                                                                     |                                                                                                                                                                                                                      |                                                                                                                                                                                                                                                                                                                                                                                                                                                                                            |
| <b>Alaluusua et al. (2002).</b><br>Natal and Neonatal Teeth in Relation to Environmental Toxicants<br><br>n/a (Helsinki and Turku, Finland)                                                  | Case control (cross-sectional)<br><br>n.a | 26 (14 cases, 12 controls)<br><br>M, F<br><br>Age at outcome assessment: Newborn to one month<br><br>1997–2000 | 17 PCDD/F, 12 DL-PCBs<br><br>Human milk<br><br>Lipid adjusted                       | Median (P25, P75) (pg WHO <sub>1998</sub> -TEQ/fat)<br><br>Cases:<br>PCDD/Fs:<br>11.9 (7.02, 14.1)<br>DL-PCB:<br>7.24 (4.55, 9.54)<br><br>Controls:<br>PCDD/Fs:<br>8.58 (6.03, 9.99)<br>DL-PCB:<br>5.26 (3.49, 6.20) | <b>Prevalence of natal and neonatal teeth</b><br><br>34,457 newborns from four hospitals located in the Helsinki and Turku area, of which 29 with natal teeth. The prevalence of natal teeth was 1:1188 and of neonatal teeth 1:1013.<br><br>Concentration of PCDD/Fs and DL-PCBs in milk from 14 mothers (Helsinki 11, Turku 3) of children with natal or neonatal teeth was not significantly different from that of 12 control mothers from the Turku area.<br><br>Risk of bias tier: 1 |
| <b>Wang et al. (2003).</b><br>Neonatal and childhood teeth in relation to perinatal exposure to polychlorinated biphenyls and dibenzofurans: observations of the Yucheng children in Taiwan. | Case control (cross-sectional)<br><br>n/a | 148 (73 Yucheng children, 75 matched controls)<br><br>M, F                                                     | 2,3,4,7,8-PeCDF, 1,2,3,4,7,8-HxCDF<br><br>Child blood (serum)<br><br>Lipid adjusted | Mean (SE), range (pg TEQ/g fat)<br><br><u>Cases</u><br>Low (n=16):<br>233 (27.2), 84.9-455<br>High (n=15):                                                                                                           | <b>Dental defects and related factors</b><br><br>Parents reported 9.6% (7/73) bearing teeth during the neonatal period in the exposed group and none in the control group.<br><br>The percentages of children with congenitally                                                                                                                                                                                                                                                            |

| Reference<br>Trial or study name<br>(Geography)                                                                                               | Study type<br>Duration           | Participants in the study<br>Sex<br>Age at outcome assessment (years)<br>Year of tissue sampling         | Compounds<br>Measurement of exposure            | Levels of exposure                                                                                                                                                                                                                                                     | Parameters measured and Measures of effect<br>Risk of bias tier                                                                                                                                                                                                                                                                                                                                                                                                                                                                                                                                                                                                                                                                                                                                |
|-----------------------------------------------------------------------------------------------------------------------------------------------|----------------------------------|----------------------------------------------------------------------------------------------------------|-------------------------------------------------|------------------------------------------------------------------------------------------------------------------------------------------------------------------------------------------------------------------------------------------------------------------------|------------------------------------------------------------------------------------------------------------------------------------------------------------------------------------------------------------------------------------------------------------------------------------------------------------------------------------------------------------------------------------------------------------------------------------------------------------------------------------------------------------------------------------------------------------------------------------------------------------------------------------------------------------------------------------------------------------------------------------------------------------------------------------------------|
| Yucheng cohort (Taiwan, Qigu District, Yucheng)                                                                                               |                                  | Mean (rage) age at outcome assessment: 9.3 (SEM 0.2)<br><br>1991–1992                                    |                                                 | 1,780 (266), 481-3,830<br><br><u>Control</u><br>12.0 (pooled serum of control children)                                                                                                                                                                                | missing tooth germ and rotated teeth were significantly increased in the exposed group (P<0.05).<br><br>The developmental defects combined (fusion, microdontia, pigmentation, enamel hypoplasia, and impaction) increased with exposure (P=0.01).<br><br>Risk of bias tier: 1                                                                                                                                                                                                                                                                                                                                                                                                                                                                                                                 |
| <b>Alaluusua et al. (2004).</b><br>Developmental dental aberrations after the dioxin accident in Seveso.<br><br>Seveso Cohort (Italy, Seveso) | Cohort<br><br>25 years follow-up | 113 (ABR: 48, non-ABR:65)<br><br>M, F<br><br>Mean (range) age at outcome assessment: 29<br><br>1976–1977 | TCDD<br><br>Blood (serum)<br><br>Lipid adjusted | Median 476 (pg/g fat)<br><br>Zone ABR:<br>T1: 31–226<br>T2: 238–592<br>T3: 700–26,000<br><br>Zone non-ABR:<br>Not available.<br>Concentration was indicated by two pooled samples from children (0-12 years) with 33.4 and 47.6 ng TCDD/g fat (Eskenazi et al., 2004). | <b>Enamel defects, lesions, caries, hypodontia</b><br><br>Enamel defects: 27 of the 113 subjects had enamel defects. 93% of these (25/27) had been <5 years of age at time of accident. Prevalence of defects in those who were <5 years of age was 42% (15/36) in zone ABR subjects and 26% (10/39) in zone non-ABR subjects. Enamel defects correlated with serum TCDD levels (only available for ABR; T1: 1/10, T2: 5/11, T3 9/15, p=0.016). Of note, the prevalence was higher in non-ABR children than in T1. The overall difference in prevalence between ABR and non-ABR was due to teeth with enamel hypoplasia (zone ABR 19.4%, zone non-ABR 5.1%).<br><br>The OR (95% CI) for enamel defects in the two higher TCDD tertiles: 2.4 (1.3–4.5) non-ABR children as referent population. |

| Reference<br>Trial or study name<br>(Geography)                                                                                                                                    | Study type<br>Duration | Participants in the study<br>Sex<br>Age at outcome assessment (years)<br>Year of tissue sampling | Compounds<br>Measurement of exposure            | Levels of exposure                                                                                                                                                                                                       | Parameters measured and Measures of effect<br>Risk of bias tier                                                                                                                                                                                                                                                                                                                                                                                                                                                                                                                                            |
|------------------------------------------------------------------------------------------------------------------------------------------------------------------------------------|------------------------|--------------------------------------------------------------------------------------------------|-------------------------------------------------|--------------------------------------------------------------------------------------------------------------------------------------------------------------------------------------------------------------------------|------------------------------------------------------------------------------------------------------------------------------------------------------------------------------------------------------------------------------------------------------------------------------------------------------------------------------------------------------------------------------------------------------------------------------------------------------------------------------------------------------------------------------------------------------------------------------------------------------------|
|                                                                                                                                                                                    |                        |                                                                                                  |                                                 |                                                                                                                                                                                                                          | <p>Hypodontia: Lateral incisors or second premolars were missing in 12.5% (6/48) of subjects from zone ABR and in 4.6% (3/65) of non-ABR subjects. Frequency increased with serum TCDD level (p=0.05).</p> <p>Caries, periodontal disease, gingival pigmentation and salivary flow rate was not associated with exposure.</p> <p>Risk of bias tier: 1</p>                                                                                                                                                                                                                                                  |
| <b>EFFECTS ON BONE</b>                                                                                                                                                             |                        |                                                                                                  |                                                 |                                                                                                                                                                                                                          |                                                                                                                                                                                                                                                                                                                                                                                                                                                                                                                                                                                                            |
| <b>Eskenazi et al. (2014).</b><br>Serum Dioxin Concentrations and Bone Density and Structure in the Seveso Women's Health Study.<br><br>Seveso Women's Health Study (SWHS) (Italy) | Cohort<br><br>32       | 339<br><br>F<br><br>Age at outcome assessment: 30-52<br><br>2008                                 | TCDD<br><br>Blood (serum)<br><br>Lipid adjusted | pg/g fat<br><br><u>All women:</u><br>Median 73.2<br>IQR: 33.1–193.0<br><br><u>Premenopause women:</u><br>median: 78.9<br>IQR: 40.9–209.0<br><br><u>Perimenopause/menopause women:</u><br>Median: 43.1<br>IQR: 21.9–129.0 | <p><b>Bone mineral density</b> at the lumbar spine and left proximal femur (neck, throchanter, intertrochanter and total hip) using DXA. <b>Hip structural analysis (HSA)</b> using mineral content and dimensional data from hip DXA images at three thin regions traversing the proximal femur, where bone size, cross sectional area and bone strength and bending strength is estimated (HSA program).</p> <p>Overall, TCDD exposure was not associated with adverse effects on adult bone health.</p> <p>A 10-fold increase in TCDD was positively associated with some measures of bone strength</p> |

| Reference<br>Trial or study name<br>(Geography)                                                                                                                      | Study type<br>Duration | Participants in the study<br>Sex<br>Age at outcome assessment (years)<br>Year of tissue sampling                       | Compounds<br>Measurement of exposure                                                                                      | Levels of exposure                                                                                                          | Parameters measured and Measures of effect<br>Risk of bias tier                                                                                                                                                                                                                                                                                             |
|----------------------------------------------------------------------------------------------------------------------------------------------------------------------|------------------------|------------------------------------------------------------------------------------------------------------------------|---------------------------------------------------------------------------------------------------------------------------|-----------------------------------------------------------------------------------------------------------------------------|-------------------------------------------------------------------------------------------------------------------------------------------------------------------------------------------------------------------------------------------------------------------------------------------------------------------------------------------------------------|
|                                                                                                                                                                      |                        |                                                                                                                        |                                                                                                                           |                                                                                                                             | and size, but differed somewhat by whether exposure occurred before or after peak bone mass.<br><br>Risk of bias tier: 1                                                                                                                                                                                                                                    |
| <b>Fukushi et al. (2016).</b><br>Effects of dioxin-related compounds on bone mineral density in patients affected by the Yusho incident.<br><br>Yusho Cohort (Japan) | Cohort<br><br>n/a      | 489 (262 women, 227 men)<br><br>M, F<br><br>Average age at outcome assessment:<br>Women: 66.3<br>Men: 66.9<br><br>2010 | 17 PCDD/Fs, 12 DL-PCBs<br><br>Blood (serum)<br>Sampled in 2004-2007,<br>36-39 years after incidence<br><br>Lipid adjusted | Individual congeners reported in pg/g fat, stratified by men and women (for women with and without osteoporosis medication) | <b>Bone mineral density</b><br><br>No significant associations between single congeners and bone mineral density after adjustment for confounders, with exception of 1,2,3,4,6,7,8-HpCDD which was negatively associated with bone mineral density in women. This congener was not increased after the contamination incidence.<br><br>Risk of bias tier: 2 |

n/a: not applicable

### A.8.11. Studies on cancer

**Table 75.** Epidemiological studies on the association between exposure to PCDD/Fs and DL-PCBs and **cancer**. Details about the risk of bias appraisal can be found in **Annex A.9**.

| Reference                                                                                                                            | Study Type             | Participants in the study                                                       | Compounds                                        | Levels of exposure                                                                                                                                                                                             | Parameters measured and Measures of effect                                                                                                                                                                                                                                                                                                                                                                                                                                                                                                                                                                                                                                                                                 |
|--------------------------------------------------------------------------------------------------------------------------------------|------------------------|---------------------------------------------------------------------------------|--------------------------------------------------|----------------------------------------------------------------------------------------------------------------------------------------------------------------------------------------------------------------|----------------------------------------------------------------------------------------------------------------------------------------------------------------------------------------------------------------------------------------------------------------------------------------------------------------------------------------------------------------------------------------------------------------------------------------------------------------------------------------------------------------------------------------------------------------------------------------------------------------------------------------------------------------------------------------------------------------------------|
| Trial or Study name (Geography)                                                                                                      | Duration               | Sex<br><br>Age at outcome assessment (years)<br><br>Year of tissue sampling     | Measurement of exposure                          |                                                                                                                                                                                                                | Risk of bias tier                                                                                                                                                                                                                                                                                                                                                                                                                                                                                                                                                                                                                                                                                                          |
| <b>INDUSTRIAL ACCIDENTS OR CONTAMINATION INCIDENTS</b>                                                                               |                        |                                                                                 |                                                  |                                                                                                                                                                                                                |                                                                                                                                                                                                                                                                                                                                                                                                                                                                                                                                                                                                                                                                                                                            |
| <b>Bertazzi et al. (2001).</b><br>Health effects of dioxin exposure: A 20-year mortality study.<br><br>Seveso Cohort (Italy, Seveso) | Cohort<br><br>20 years | 232,745<br><br>M, F<br><br>Age at outcome assessment: all ages<br><br>1976–1977 | TCDD<br><br>Blood (plasma)<br><br>Lipid adjusted | Median (pg/g fat)<br><br><u>Zone A</u><br>1976–77: 447.0<br>1993–94: 73.7<br><br><u>Zone B</u><br>1976–77: 94.0<br>1993–94: 12.4<br><br><u>Zone R</u><br>1976–77: 48.0<br><br><u>Reference</u><br>1993–94: 5.5 | <b>Evidence of latency of effects from 10–15 years</b><br><br>Mortality among men in Zones A and B increased from:<br>- All cancers: RR=1.3, 95% CI 1.0–1.7<br>- Rectal cancer: RR=2.4, 95% CI 1.2–4.6<br>- Lung cancer: RR=1.3, 95% CI 1.0–1.7<br><br>Increased in RR after 15 years for lung and rectal cancer.<br>Excess of lymphohaematopoietic neoplasms in both genders (RR=1.7, 95% CI 1.2–2.5)<br><br>Hodgkin's disease risk elevated in first 10 years observation period (RR=4.9, 95% CI 1.5–16.4), whereas highest increase for non-Hodgkin's lymphoma (RR=2.8, 95% CI 1.1–7.0) and myeloid leukaemia (RR=3.8, 95% CI 1.2–12.5) occurred after 15 years.<br><br>No soft tissue sarcoma cases found in the zones |

| Reference<br>Trial or Study name<br>(Geography)                                                                                                                                                                                            | Study Type<br>Duration                  | Participants in the study<br>Sex<br>Age at outcome assessment (years)<br>Year of tissue sampling                                        | Compounds<br>Measurement of exposure                                                                                       | Levels of exposure                                                                                                                                   | Parameters measured and Measures of effect<br>Risk of bias tier                                                                                                                                                                                                                                                                                                                                                                                                                                           |
|--------------------------------------------------------------------------------------------------------------------------------------------------------------------------------------------------------------------------------------------|-----------------------------------------|-----------------------------------------------------------------------------------------------------------------------------------------|----------------------------------------------------------------------------------------------------------------------------|------------------------------------------------------------------------------------------------------------------------------------------------------|-----------------------------------------------------------------------------------------------------------------------------------------------------------------------------------------------------------------------------------------------------------------------------------------------------------------------------------------------------------------------------------------------------------------------------------------------------------------------------------------------------------|
| <p><b>Warner et al. (2002).</b> Serum dioxin concentrations and breast cancer risk in the Seveso Women's Health Study.</p> <p>Seveso Women's Health Study (SWHS) (Italy, Seveso)</p>                                                       | <p>Cohort</p> <p>20 years follow-up</p> | <p>981</p> <p>F</p> <p>Age at outcome assessment:<br/>20–29 (n=191)<br/>30–39 (n=284)<br/>40–49 (n=244)<br/>≥50 (n=262)</p> <p>1996</p> | <p>TCDD</p> <p>Blood (serum) (1976–1981), some back extrapolated with <math>t_{1/2}</math> 9 yrs</p> <p>Lipid adjusted</p> | <p>Median (pg/g fat)</p> <p>Breast cancer cases (n=15): 71.8</p> <p>Non-cancer cases (n=981): 55.1</p>                                               | <p>Risk of bias tier: 2</p> <p><b>Breast cancer</b></p> <p>HR for breast cancer associated with a 10-fold increase in serum TCDD levels (<math>\log_{10}</math>TCDD) significantly increased to 2.1 (95% CI 1.0–4.6).</p> <p>Covariate-adjusted results were not different.</p> <p>Risk of bias tier: 1</p> <p><i>Comments: Only some results reported. Some selection bias.</i></p>                                                                                                                      |
| <p><b>Pesatori et al. (2008).</b> Aryl hydrocarbon receptor-interacting protein and pituitary adenomas: a population-based study on subjects exposed to dioxin after the Seveso, Italy, accident.</p> <p>Seveso Cohort (Italy, Seveso)</p> | <p>Cohort</p> <p>0-20 years</p>         | <p>45,369</p> <p>M, F</p> <p>Age (range) at outcome assessment: all ages</p> <p>1976</p>                                                | <p>TCDD</p> <p>Blood (serum) (1977–78)</p> <p>Lipid adjusted</p>                                                           | <p>Median (pg/g fat):</p> <p>Zone A (n=296): 447</p> <p>Zone B (n=80): 94</p> <p>Zone R (n=48): 48</p> <p>Number based on Pesatori et al. (2009)</p> | <p><b>Pituitary adenoma</b></p> <p>Small sample size but a tendency for increased risk.</p> <p>No statistically significant increase in pituitary adenoma incidence in subjects exposed to high and intermediate TCDD concentrations in comparison with the non-exposed reference population.</p> <p>Eight tumours identified between 1986-1996 in 5 F and 3 M (non-functioning pituitary tumours n=4, prolactin secreting adenoma n=4).</p> <p>Tendency toward s a higher risk of pituitary tumours:</p> |



| Reference<br>Trial or Study name<br>(Geography)                                                                                                                                      | Study Type<br>Duration           | Participants in the study<br>Sex<br>Age at outcome assessment (years)<br>Year of tissue sampling | Compounds<br>Measurement of exposure                                                                  | Levels of exposure                                                                                                                                                                                                                                                               | Parameters measured and Measures of effect<br>Risk of bias tier                                                                                                                                                                             |
|--------------------------------------------------------------------------------------------------------------------------------------------------------------------------------------|----------------------------------|--------------------------------------------------------------------------------------------------|-------------------------------------------------------------------------------------------------------|----------------------------------------------------------------------------------------------------------------------------------------------------------------------------------------------------------------------------------------------------------------------------------|---------------------------------------------------------------------------------------------------------------------------------------------------------------------------------------------------------------------------------------------|
|                                                                                                                                                                                      |                                  |                                                                                                  |                                                                                                       |                                                                                                                                                                                                                                                                                  | Zone A: RR=6.2, 95% CI 0.9–45.5, P=0.07<br>Zone B: RR=1.9, 95% CI 0.5–7.7, P=0.39<br><br>Risk of bias tier: 2                                                                                                                               |
| <b>Consonni et al. (2008).</b><br>Mortality in a population exposed to dioxin after the Seveso, Italy, accident in 1976: 25 years of follow-up.<br><br>Seveso Cohort (Italy, Seveso) | Cohort<br><br>25 year follow-up  | 278,108<br><br>M, F<br><br>Age at outcome assessment: all ages<br><br>1976–1977, 1992–1996       | TCDD<br><br>Blood (serum)<br><br>Lipid adjusted                                                       | Median (pg/g fat)<br><br><u>Zone A:</u><br>1976–77 (n=296): 447.0<br>1992–96 (n=7): 73.3<br><u>Zone B:</u><br>1976–77 (n=80): 94.0<br>1992–96 (n=51): 12.4<br><u>Zone R:</u><br>1976–77 (n=48): 48.0<br>1992–96: n/a<br><u>Reference:</u><br>1976–77: n/a<br>1992–96 (n=52): 5.5 | Increased risk of lymphatic and haematological cancer in both exposed zones but the number of cases is small:<br>Zone A (6 deaths): RR=2.23, 95% CI 1.00–4.97<br>Zone B (28 deaths): RR=1.59, 95% CI 1.09–2.33.<br><br>Risk of bias tier: 2 |
| <b>Pesatori et al. (2009).</b><br>Cancer incidence in the population exposed to dioxin after the “Seveso accident”: twenty years of follow-up.<br><br>Seveso Cohort (Italy, Seveso)  | Cohort<br><br>20 years follow-up | 2,122<br><br>M, F<br><br>Age at outcome assessment not reported                                  | TCDD, 17 PCDD/Fs, 12 DL-PCBs (as WHO <sub>2005</sub> -TEQ)<br><br>Blood (serum)<br><br>Lipid adjusted | Median TCDD (pg/g fat)<br><br><u>Zone A:</u><br>1976 (n=296): 447.0<br>1993–94 (n=7): 73.3<br><u>Zone B:</u><br>1976 (n=80): 94.0                                                                                                                                                | <b>Cancer incidence</b><br><br>All cancer incidences did not differ from expectations in any of the contaminated zones.<br><br>Increased risk of lymphatic and haematological cancer in both exposed zones but the number of cases is small |

| Reference<br>Trial or Study name<br>(Geography)                                                                                                               | Study Type<br>Duration                               | Participants in the study<br>Sex<br>Age at outcome assessment (years)<br>Year of tissue sampling | Compounds<br>Measurement of exposure    | Levels of exposure                                                                                                                                                                                                                                                                                                               | Parameters measured and Measures of effect<br>Risk of bias tier                                                                                                                                                                                                                                                                                                                                                                                                  |
|---------------------------------------------------------------------------------------------------------------------------------------------------------------|------------------------------------------------------|--------------------------------------------------------------------------------------------------|-----------------------------------------|----------------------------------------------------------------------------------------------------------------------------------------------------------------------------------------------------------------------------------------------------------------------------------------------------------------------------------|------------------------------------------------------------------------------------------------------------------------------------------------------------------------------------------------------------------------------------------------------------------------------------------------------------------------------------------------------------------------------------------------------------------------------------------------------------------|
|                                                                                                                                                               |                                                      | 1976, 1993–1994                                                                                  |                                         | 1993–94 (n=51): 12.4<br><u>Zone R:</u><br>1976 (n=48): 48.0<br>1993–94: n/a<br><u>Reference:</u><br>1976: n/a<br>1993–94 (n=52): 5.5<br><br>Median (pg WHO <sub>2005</sub> -TEQ/g fat)<br><br><u>Zone A</u> (1993–94): 94.0<br><u>Zone B</u> (1993–94): 43.2<br><u>Zone R</u> (1993–94): n/a<br><u>Reference</u> (1993–94): 38.8 | - Zone A (4 cases): RR=1.39, 95% CI 0.52–3.71<br>- Zone B (29 cases): RR=1.56, 95% CI 1.07–2.27<br><br>Increased risk of breast cancer in zone A (F) after 15 years since the accident (5 cases): RR=2.57, 95% CI 1.07–6.20).<br><br>No cancer cases observed among subjects diagnosed with chloracne early after the accident.<br><br>No cases of soft tissue sarcomas occurred in the most exposed zones (A and B, 1.17 expected).<br><br>Risk of bias tier: 2 |
| <b>Warner et al. (2011).</b><br>Dioxin Exposure and Cancer Risk in the Seveso Women's Health Study.<br><br>Seveso Women's Health Study (SWHS) (Italy, Seveso) | Cohort<br><br>32 years (following explosion in 1976) | 833<br><br>F<br><br>Age (mean, SD) at outcome assessment: 50.8 (11.8)                            | TCDD<br><br>Blood<br><br>Lipid adjusted | Mean (SD) (pg/g fat)<br><br>Cancer cases: 95.3 (4.0)<br><br>Non-cancer cases: 67.9 (4.2)<br><br>(p=0.06)                                                                                                                                                                                                                         | <b>All cancers and breast cancer</b><br><br>Adjusted HR associated with a 10-fold increase in serum TCDD for all cancers combined significantly increased (adj HR=1.80, 95% CI 1.29–2.52).<br><br>For breast cancer, the HR was increased, but not significantly (adj HR=1.44, 95% CI 0.89–2.33).                                                                                                                                                                |

| Reference<br>Trial or Study name<br>(Geography)                                                                                                                                                               | Study Type<br>Duration                             | Participants in the study<br>Sex<br>Age at outcome assessment (years)<br>Year of tissue sampling | Compounds<br>Measurement of exposure                                                    | Levels of exposure                                                                                                                                                                                                                                        | Parameters measured and Measures of effect<br>Risk of bias tier                                                                                                                                                                                                                                                                                                                                                                                                                                                                                                                                                                                                                                         |
|---------------------------------------------------------------------------------------------------------------------------------------------------------------------------------------------------------------|----------------------------------------------------|--------------------------------------------------------------------------------------------------|-----------------------------------------------------------------------------------------|-----------------------------------------------------------------------------------------------------------------------------------------------------------------------------------------------------------------------------------------------------------|---------------------------------------------------------------------------------------------------------------------------------------------------------------------------------------------------------------------------------------------------------------------------------------------------------------------------------------------------------------------------------------------------------------------------------------------------------------------------------------------------------------------------------------------------------------------------------------------------------------------------------------------------------------------------------------------------------|
|                                                                                                                                                                                                               |                                                    | 1976–1977 (n=894), 1978–1981 (n=59), 1996–1997 (n=28)                                            |                                                                                         |                                                                                                                                                                                                                                                           | Increased Risk for breast cancer seen in earlier studies not sustained. Most women not yet in 50s so cancer risk may increase with longer follow up.<br><br>Risk of bias tier: 1                                                                                                                                                                                                                                                                                                                                                                                                                                                                                                                        |
| <b>OCCUPATIONAL STUDIES</b>                                                                                                                                                                                   |                                                    |                                                                                                  |                                                                                         |                                                                                                                                                                                                                                                           |                                                                                                                                                                                                                                                                                                                                                                                                                                                                                                                                                                                                                                                                                                         |
| <b>Heederik et al. (1998).</b><br>Modelling of 2,3,7,8-tetrachlorodibenzo- <i>p</i> -dioxin levels in a cohort of workers with exposure to phenoxy herbicides and chlorophenols.<br><br>n/a (The Netherlands) | Cohort<br><br>1963 (exposure due to accident)–1991 | 47<br><br>M, F<br><br>Age at outcome assessment: not reported<br><br>1993                        | 17 PCDD/Fs, 4 DL-PCBs (-77, -81, -126, -169)<br><br>Blood (serum)<br><br>Lipid adjusted | (pg/g fat)<br><br>TCDD Mean (SD): 37.3 (53.1)<br><br>TCDD Median (range): 8.2 (1.9-194)<br><br>Levels back-extrapolated TCDD at the time of occupational exposure (using three different half-life of 5.8 years, 7.1 years and 11.3 years) also provided. | <b>Relative risks of selected causes of death from occupational exposure for male workers with medium and high TCDD levels compared to workers with low levels based on model predicted TCDD<sub>max</sub> (t<sub>1/2</sub>=7.1 years)</b><br><br>RR (95% CI)<br>Low levels      Medium levels      High levels<br><br><b>All causes</b><br>1.0                      1.9 (1.2–2.8)      1.9 (1.3–2.8)<br><br><b>Malignant neoplasms</b><br>1.0                      4.8 (2.0–11.3)      4.4 (1.9–10.4)<br>Trachea, bronchus, lung<br>1.0                      6.4 (0.8–53.1)      6.8 (0.9–54.4)<br>Respiratory organs<br>1.0                      7.7 (1.0–63.2)      7.7 (1.0–61.1)<br>Urinary organs |

| Reference                                                                                                                                                                  | Study Type                                  | Participants in the study                                                                                           | Compounds                                                    | Levels of exposure                                                                                                                            | Parameters measured and Measures of effect                                                                                                                                                                                                                                         |
|----------------------------------------------------------------------------------------------------------------------------------------------------------------------------|---------------------------------------------|---------------------------------------------------------------------------------------------------------------------|--------------------------------------------------------------|-----------------------------------------------------------------------------------------------------------------------------------------------|------------------------------------------------------------------------------------------------------------------------------------------------------------------------------------------------------------------------------------------------------------------------------------|
| Trial or Study name (Geography)                                                                                                                                            | Duration                                    | Sex                                                                                                                 | Measurement of exposure                                      |                                                                                                                                               | Risk of bias tier                                                                                                                                                                                                                                                                  |
|                                                                                                                                                                            |                                             | Age at outcome assessment (years)                                                                                   |                                                              |                                                                                                                                               |                                                                                                                                                                                                                                                                                    |
|                                                                                                                                                                            |                                             | Year of tissue sampling                                                                                             |                                                              |                                                                                                                                               |                                                                                                                                                                                                                                                                                    |
|                                                                                                                                                                            |                                             |                                                                                                                     |                                                              |                                                                                                                                               | 1.0      8.5 (1.0–71.7)      1.0 (0.1–16.5)<br>Non-Hodgkin's lymphoma<br>1.0      1.2 (0.1–19.7)      2.4 (0.2–27.5)<br><br>Predicted levels were positively associated with increased (cause-specific) mortality.<br><br>Risk of bias tier: 1                                     |
| <b>Becher et al. (1998).</b><br>Quantitative cancer risk assessment for dioxins using an occupational cohort.<br><br>n/a (Hamburg, Germany)                                | Cohort<br><br>1952–1984<br>(follow up 1992) | 1,189<br><br>M<br><br>Age at outcome assessment: not reported (adults)<br><br>Year of tissue sampling: not reported | TCDD<br><br>Blood<br><br>Lipid adjusted                      | Exposure verified in sample of 275 workers<br><br>Mean (pg/g fat)<br>101.3 (2-2,252)<br><br>Integrated TCDD concentration over time           | <b>Total cancer mortality</b><br><br>Quantitative cancer RA<br><br>Increased SMR for total cancer 1.41, 95% CI 1.17–1.68. Interval of $10^{-3}$ – $10^{-2}$ additional cancer lifetime risk under daily intake 1 pg/kg bw/day from dose response model<br><br>Risk of bias tier: 1 |
| <b>Collins et al. (2009a).</b><br>Mortality rates among trichlorophenol workers with exposure to 2,3,7,8-tetrachlorobidibenzo- <i>p</i> -dioxin.<br><br>n/a (Michigan, US) | Cohort<br><br>Follow-up:<br>1942–2003       | 1,615<br><br>Mean age at start of follow-up: 29.6<br><br>Year of blood sampling not reported                        | TCDD<br><br>Blood<br><br>Not reported whether lipid adjusted | Blood samples were analysed from 17% of the subjects (n=280). Historical exposures based on these to estimate the TCDD levels of all workers. | 1 compartment model<br><br>No increase in SMR for all cancer combined (SMR=1.0, 95% CI 0.8–1.1). No increase in lung cancer (SMR=0.7, 95% CI 0.5–0.9). Four deaths from soft tissue sarcoma (SMR=4.1, 95% CI 1.1–10.5)<br><br>Risk of bias tier: 1                                 |

| Reference<br>Trial or Study name<br>(Geography)                                                                                                                                                                                                              | Study Type<br>Duration           | Participants in the study<br>Sex<br>Age at outcome assessment (years)<br>Year of tissue sampling       | Compounds<br>Measurement of exposure                                | Levels of exposure                                                                                                                                                      | Parameters measured and Measures of effect<br>Risk of bias tier                                                                                                                                                                                                                                         |
|--------------------------------------------------------------------------------------------------------------------------------------------------------------------------------------------------------------------------------------------------------------|----------------------------------|--------------------------------------------------------------------------------------------------------|---------------------------------------------------------------------|-------------------------------------------------------------------------------------------------------------------------------------------------------------------------|---------------------------------------------------------------------------------------------------------------------------------------------------------------------------------------------------------------------------------------------------------------------------------------------------------|
| <b>Collins et al. (2009b).</b><br>Mortality rates among workers exposed to dioxins in the manufacture of pentachlorophenol.<br><br>n/a (Michigan, US)                                                                                                        | Cohort<br><br>Exposure 1937-1980 | 773<br>128 blood samples<br><br>196 exposed<br><br>Year of tissue sampling: not reported               | TCDD<br><br>Blood<br><br>Not reported whether lipid adjusted        | Historical exposures based on these to estimate the TCDD levels of all workers.                                                                                         | 1 compartment model<br><br>No increase in SMR for all cancer combined using low, medium and high TCDD<br>8 deaths from NHL (SMR 2.4 95% CI1.0-4.8)<br><br>Risk of bias tier: 2                                                                                                                          |
| <b>Flesch-Janys et al. (1998).</b> Estimation of the cumulative exposure to polychlorinated dibenzo- <i>p</i> -dioxins/furans and standardised Mortality ratio analysis of cancer mortality by dose in an occupationally exposed cohort<br><br>n/a (Germany) | Cohort                           | 1,189<br><br>M<br><br>Age at outcome assessment: Unclear<br><br>Year of tissue sampling: not reported. | TCDD<br><br>Blood (serum) from 275<br><br>Measured blood in M and F | Estimation of cumulative job exposure to TCDD<br>413 deaths                                                                                                             | SMR all cancer 1.41 95% CI 1.17–1.68<br><br>Trend for increasing effect only significant for total cancer combined<br><br>Risk of bias tier: 2                                                                                                                                                          |
| <b>Steenland et al. (2001b).</b><br>Risk assessment for 2,3,7,8-tetrachlorodibenzo- <i>p</i> -dioxin (TCDD) based on an epidemiologic study.<br><br>n/a (US)                                                                                                 | Cohort                           | 170<br><br>M<br><br>1988<br><br>Age at outcome assessment: Unclear<br><br>Year of tissue               | TCDD<br><br>Blood (serum)<br><br>Lipid adjusted                     | Levels back-calculated using a half-life of 8.7 years<br><br>Estimated TCDD concentration from dose response using cumulative serum level<br><br><u>Estimated serum</u> | <b>All cancer mortality</b><br><br>Positive trend ( $p=0.003$ ) between estimated log cumulative TCDD serum level and cancer mortality.<br><br>For males excess lifetime risk of dying of cancer at intake of 1 pg/kg bw/day was 0.05–0.9% against a lifetime risk of 12.4%<br><br>Risk of bias tier: 1 |

| Reference<br>Trial or Study name<br>(Geography)                                                                                                                                                                         | Study Type<br>Duration                           | Participants in the study<br>Sex<br>Age at outcome assessment (years)<br>Year of tissue sampling                                                                                                               | Compounds<br>Measurement of exposure                       | Levels of exposure                                                                                                                                                                                                                 | Parameters measured and Measures of effect<br>Risk of bias tier                                                                                                                                                                                                                                                                                                                                                                                                                                                                                              |
|-------------------------------------------------------------------------------------------------------------------------------------------------------------------------------------------------------------------------|--------------------------------------------------|----------------------------------------------------------------------------------------------------------------------------------------------------------------------------------------------------------------|------------------------------------------------------------|------------------------------------------------------------------------------------------------------------------------------------------------------------------------------------------------------------------------------------|--------------------------------------------------------------------------------------------------------------------------------------------------------------------------------------------------------------------------------------------------------------------------------------------------------------------------------------------------------------------------------------------------------------------------------------------------------------------------------------------------------------------------------------------------------------|
|                                                                                                                                                                                                                         |                                                  | sampling: 1988                                                                                                                                                                                                 |                                                            | <u>level at end of follow-up:</u><br>Median (range): 9 (5–52,681)<br>Mean (SD): 343 (2,223)<br><br><u>Estimated serum level at end of exposure:</u><br>Median: 98 (6–210,054)<br>Mean (SD): 1,589 (8,208)                          |                                                                                                                                                                                                                                                                                                                                                                                                                                                                                                                                                              |
| <b>Ketchum et al. (1999).</b><br>Serum dioxin and cancer in veterans of Operation Ranch Hand.<br><br>Air Force Health Study (AFHS, Operation Ranch Hand) (US Veterans that served in Southeast Asia during Vietnam War) | Cohort<br><br>Follow-up measured in 1987 or 1992 | 2,255<br><br>M<br><br>Mean (SD) age at outcome assessment:<br><u>Comparison group:</u> 53.5 (7.6)<br><u>Ranch Hand:</u><br>Background: 54.6 (7.2)<br>'Low': 54.6 (7.6)<br>'High': 50.9 (7.4)<br><br>1987, 1992 | TCDD<br><br>Blood (serum)<br><br>Unclear if lipid adjusted | Median (range) (pg/g)<br><br><u>Comparison:</u> 4.0 (0–10)<br><br><u>Ranch Hand (Levels measured):</u><br>Background: 5.7 (0–10)<br>'Low': 52.3 (27–94)<br>'High': 195.7 (94–3,290)<br><br>Serum levels also back-calculated to at | <b>Skin cancer by cell type, cancers at sites other than the skin, specific cancer among veterans, cancer latency</b><br><br>There is no consistent dose response and no significant increase in cancer risk in the 'High' dioxin exposed group. Cancer risk at sites other than skin increased in low TCDD exposed group but results inconsistent. Some effects (latency) concluded not to be associated with TCDD exposure.<br><br>Risk of bias tier: 2<br><br>Comments: <i>This study had low power to detect an effect for specific or rare cancers.</i> |

| Reference<br>Trial or Study name<br>(Geography)                                                                                                                                                               | Study Type<br>Duration | Participants in the study<br>Sex<br>Age at outcome assessment (years)<br>Year of tissue sampling                                                                  | Compounds<br>Measurement of exposure            | Levels of exposure                                                                                                                                                                                                                                                               | Parameters measured and Measures of effect<br>Risk of bias tier                                                                                                                                           |
|---------------------------------------------------------------------------------------------------------------------------------------------------------------------------------------------------------------|------------------------|-------------------------------------------------------------------------------------------------------------------------------------------------------------------|-------------------------------------------------|----------------------------------------------------------------------------------------------------------------------------------------------------------------------------------------------------------------------------------------------------------------------------------|-----------------------------------------------------------------------------------------------------------------------------------------------------------------------------------------------------------|
|                                                                                                                                                                                                               |                        | 1962–1971                                                                                                                                                         |                                                 | the end of service in Vietnam using a constant half-life of 8.7 years.                                                                                                                                                                                                           |                                                                                                                                                                                                           |
| <b>Akhtar et al. (2004).</b><br>Cancer in US Air Force veterans of the Vietnam War.<br><br>Air Force Health Study (AFHS, Operation Ranch Hand) (US Veterans that served in Southeast Asia during Vietnam War) | Cohort<br>n/a          | 2,438<br>M<br><br>Median age at examination in 1982:<br>Comparison: 43.3<br>Ranch Hand<br>Background: 45.1<br>'Low': 45.5<br>'High': 37.2<br><br>1987, 1992, 1997 | TCDD<br><br>Blood (serum)<br><br>Lipid adjusted | Median (range) (pg/g fat) (1987, 1992 or 1997):<br><br>'Low':<br>15.2 (10–29.2)<br>'High':<br>47.7 (18–617.8)<br><br>Back-extrapolated to end of service in Vietnam using a constant half-life of 7.6 years:<br><br>'Low':<br>66 (32.2–118.5)<br>'High':<br>245.5 (119.3–4221.9) | <b>Cancer incidence, cancer mortality</b><br><br>White Ranch Hand veterans increased incidence prostate and melanoma but restricted to <2 years of service in Southeast Asia.<br><br>Risk of bias tier: 2 |
| <b>Pavuk et al. (2005).</b> Did TCDD exposure or service in southeast Asia increase the risk of cancer in air force Vietnam veterans who did not spray agent orange?                                          | Cohort<br>20 years     | 1,482<br>M<br><br>Age at outcome assessment: not                                                                                                                  | TCDD<br><br>Blood (serum)<br><br>Lipid adjusted | Median (range) (pg/g fat)<br><br>3.8 (5.2–54.8)                                                                                                                                                                                                                                  | <b>Cancer incidence</b><br><br>All sites cancer risk increased with TCDD (RR=1.6, 95% CI 1.2–2.2)<br><br>Risk of prostate cancer increased with years of                                                  |

| Reference<br>Trial or Study name<br>(Geography)                                                                                                                                                                                                                                                   | Study Type<br>Duration | Participants in the study<br>Sex<br>Age at outcome assessment (years)<br>Year of tissue sampling                                                            | Compounds<br>Measurement of exposure            | Levels of exposure                                                                                                                                                                                                                                                                                        | Parameters measured and Measures of effect<br>Risk of bias tier                                                                                                                                                                                                                                                                                                                 |
|---------------------------------------------------------------------------------------------------------------------------------------------------------------------------------------------------------------------------------------------------------------------------------------------------|------------------------|-------------------------------------------------------------------------------------------------------------------------------------------------------------|-------------------------------------------------|-----------------------------------------------------------------------------------------------------------------------------------------------------------------------------------------------------------------------------------------------------------------------------------------------------------|---------------------------------------------------------------------------------------------------------------------------------------------------------------------------------------------------------------------------------------------------------------------------------------------------------------------------------------------------------------------------------|
| Air Force Health Study (AFHS, Operation Ranch Hand) (US Veterans that served in Southeast Asia during Vietnam War)                                                                                                                                                                                |                        | clear<br>1987                                                                                                                                               |                                                 |                                                                                                                                                                                                                                                                                                           | service in Southeast Asia but not with TCDD exposure.<br><br>TCDD and years of service in Southeast Asia interacted with all sites cancer. Risk was greatest in those with highest TCDD levels and longest time served in Southeast Asia.<br><br>Risk of bias tier: 2<br><br><i>Comments:</i> Some confounding variables noted but potential for mixed exposures not considered |
| <b>Ketchum and Michalek (2005).</b> Postservice mortality of Air Force veterans occupationally exposed to herbicides during the Vietnam War: 20-year follow-up results.<br><br>Air Force Health Study (AFHS, Operation Ranch Hand) (US Veterans that served in Southeast Asia during Vietnam War) | Cohort<br>28–37 years  | 2,452<br>M<br><br>The median birth year and age range is indicated in Table VII. The median age range at exposure can be calculated<br><br>1987, 1992, 1997 | TCDD<br><br>Blood (serum)<br><br>Lipid adjusted | Median (range) in 1987, 1992, 1997 (pg/g fat)<br><br><u>Comparison:</u><br>4.0 (0.4–54.8)<br><u>Background:</u><br>5.7 (0.6–10.0)<br><u>Low:</u> 15.0 (10.0–29.2)<br><u>High:</u> 47.4 (18.0–617.8)<br><br>Median (range) TCDD extrapolated levels at the end of the last tour of duty in Vietnam using a | <b>Post service mortality</b><br><br>The risk of death caused by cancer was not increased (RR=1.0).<br><br>Highest exposure group had increased risk of mortality but circulatory disease rather than cancer.<br><br>Risk of bias tier: 2                                                                                                                                       |



| Reference                                                                                                                                                                                                                                    | Study Type                | Participants in the study                                                                                                               | Compounds                                       | Levels of exposure                                                                                                                                                                                                                                                                                                                             | Parameters measured and Measures of effect                                                                                                                                                                                                                           |
|----------------------------------------------------------------------------------------------------------------------------------------------------------------------------------------------------------------------------------------------|---------------------------|-----------------------------------------------------------------------------------------------------------------------------------------|-------------------------------------------------|------------------------------------------------------------------------------------------------------------------------------------------------------------------------------------------------------------------------------------------------------------------------------------------------------------------------------------------------|----------------------------------------------------------------------------------------------------------------------------------------------------------------------------------------------------------------------------------------------------------------------|
| Trial or Study name (Geography)                                                                                                                                                                                                              | Duration                  | Sex<br><br>Age at outcome assessment (years)<br><br>Year of tissue sampling                                                             | Measurement of exposure                         |                                                                                                                                                                                                                                                                                                                                                | Risk of bias tier                                                                                                                                                                                                                                                    |
|                                                                                                                                                                                                                                              |                           |                                                                                                                                         |                                                 | constant half-life of 7.6 years (pg/g fat)<br><br>'Low': 65.0 (32.2–117.4)<br>'High': 244.8 (117.9–4,221.9)                                                                                                                                                                                                                                    |                                                                                                                                                                                                                                                                      |
| <b>Kang et al. (2006).</b> Health status of Army Chemical Corps Vietnam veterans who sprayed defoliant in Vietnam.<br><br>Air Force Health Study (AFHS, Operation Ranch Hand) (US Veterans that served in Southeast Asia during Vietnam War) | Cohort<br><br>28-35 years | 1241<br><br>M<br><br>Median age at outcome assessment:<br><u>Vietnam service:</u> 53<br><u>Non-Vietnam service:</u> 51<br><br>1999–2000 | TCDD<br><br>Blood (serum)<br><br>Lipid adjusted | Mean (pg/g fat) <sup>(a)</sup><br><br>Vietnam service and self-reported herbicide spraying (n=357): 4.3 (0.5–85.8)<br><br>Vietnam service and no self-reported herbicide spraying (n=413): 2.7 (0.6–27.7)<br><br>Non-Vietnam service and self-reported herbicide spraying (n=9): 3.1 (0.8–9.6)<br><br>Non-Vietnam service and no self-reported | <b>All cancer and leukaemia</b><br><br>Higher prevalence of cancer in sprayers versus non sprayers but not significant.<br><br>All cancer prevalence:<br>Vietnam: 108 (7.2%)<br>Non-Vietnam: 53 (3.71%)<br>Adj OR=1.46, 95% CI 1.02–2.10<br><br>Risk of bias tier: 2 |

| Reference<br>Trial or Study name<br>(Geography)                                                                                                                                                                       | Study Type<br>Duration   | Participants in the study<br>Sex<br>Age at outcome assessment (years)<br>Year of tissue sampling                              | Compounds<br>Measurement of exposure            | Levels of exposure                                                                                                                                                                                                                                                                                                                                                             | Parameters measured and Measures of effect<br>Risk of bias tier                                                                                                                                                                                                                                                                                                                                                                                                                                                                                                                                                                                                               |
|-----------------------------------------------------------------------------------------------------------------------------------------------------------------------------------------------------------------------|--------------------------|-------------------------------------------------------------------------------------------------------------------------------|-------------------------------------------------|--------------------------------------------------------------------------------------------------------------------------------------------------------------------------------------------------------------------------------------------------------------------------------------------------------------------------------------------------------------------------------|-------------------------------------------------------------------------------------------------------------------------------------------------------------------------------------------------------------------------------------------------------------------------------------------------------------------------------------------------------------------------------------------------------------------------------------------------------------------------------------------------------------------------------------------------------------------------------------------------------------------------------------------------------------------------------|
| <b>Pavuk et al. (2006).</b><br>Prostate cancer in US Air Force veterans of the Vietnam war.<br><br>Air Force Health Study (AFHS, Operation Ranch Hand) (US Veterans that served in Southeast Asia during Vietnam War) | Cohort<br>21 years       | 2,516 (Ranch Hand: 1,019, Comparison: 1,497)<br><br>M<br><br>Age at outcome assessment: unclear<br><br>1987, 1992, 1997, 2003 | TCDD<br><br>Blood (serum)<br><br>Lipid adjusted | herbicide spraying (n=87):<br>2.1 (0.4–12.5)<br>Median (10-90%) in 1987 (pg/g fat)<br><br><u>Comparison:</u><br>3.9 (1.6-7.1)<br><u>Ranch Hand:</u><br>11.6 (3.6-61.6)<br><br>20-years median cumulative TCDD level from the end of exposure in Vietnam to the end of follow-up (pg/g fat):<br><br><u>Comparison:</u><br>77.2 (32–141)<br><u>Ranch Hand:</u><br>433 (72–3,008) | <b>Prostate cancer</b><br><br>No overall increase in the risk of prostate cancer in Ranch Hand veterans versus the Comparison group.<br><br>Positive association in Ranch Hand veterans in the Higher TCDD category who served before 1969 (RR=2.27, 95% CI 1.11–4.66) when more contaminated herbicides were used, but the number of cases was small (n=15).<br><br>Within-group comparison: in Comparison veterans the time served was associated with an increased risk of prostate cancer (RR=2.18, 95% CI 1.27–3.76).<br><br>No increase in the risk of prostate cancer within the Ranch Hand group in association with TCDD or time served.<br><br>Risk of bias tier: 2 |
| <b>Michalek and Pavuk (2008).</b> Diabetes and cancer in veterans of Operation Ranch Hand after adjustment for calendar period, days of                                                                               | Cohort<br>11 to 40 years | 2,583<br><br>M<br><br>Age at outcome                                                                                          | TCDD<br>Blood (serum)<br><br>Lipid adjusted     | Median (pg/g fat)<br><br><u>Vietnam service:</u><br>Comparisons: 4<br>Ranch Hand: 12.6                                                                                                                                                                                                                                                                                         | <b>Cancer</b><br><br>There is only an increased risk of cancer (all) when 3 levels of stratification are taken into account. This means smaller numbers.                                                                                                                                                                                                                                                                                                                                                                                                                                                                                                                      |

| Reference                                                                                                                                                                                                                                                                                              | Study Type                             | Participants in the study                                                        | Compounds                                                                                            | Levels of exposure                                                                                                                                                                                                                                                                                       | Parameters measured and Measures of effect                                                                                                                                                                                                                                                                                                                                                                                                                                                                                                 |
|--------------------------------------------------------------------------------------------------------------------------------------------------------------------------------------------------------------------------------------------------------------------------------------------------------|----------------------------------------|----------------------------------------------------------------------------------|------------------------------------------------------------------------------------------------------|----------------------------------------------------------------------------------------------------------------------------------------------------------------------------------------------------------------------------------------------------------------------------------------------------------|--------------------------------------------------------------------------------------------------------------------------------------------------------------------------------------------------------------------------------------------------------------------------------------------------------------------------------------------------------------------------------------------------------------------------------------------------------------------------------------------------------------------------------------------|
| Trial or Study name (Geography)                                                                                                                                                                                                                                                                        | Duration                               | Sex<br><br>Age at outcome assessment (years)<br><br>Year of tissue sampling      | Measurement of exposure                                                                              |                                                                                                                                                                                                                                                                                                          | Risk of bias tier                                                                                                                                                                                                                                                                                                                                                                                                                                                                                                                          |
| <p>spraying, and time spent in Southeast Asia.</p> <p>Air Force Health Study (AFHS, Operation Ranch Hand) (US Veterans that served in Southeast Asia during Vietnam War)</p>                                                                                                                           |                                        | <p>assessment: unclear</p> <p>1987, 1992, 1997, 2002</p>                         |                                                                                                      | <p><u>No Vietnam service:</u><br/>Comparison: 3.9<br/>Ranch Hand: 10.6</p> <p><u>Days of spraying:</u><br/>Comparison: 3.9<br/>Ranch Hand:<br/>≥90 days : 13.3<br/>&lt;90 days : 5.9</p> <p>Median TCDD extrapolated levels to the end of service in Vietnam using a constant half-life of 7.6 years</p> | <p>Without stratification: no significant increase in the risk of cancer with log(TCDD) in the combined cohort (P=0.24) and no significant increase in the risk of all-site SEER cancer in any of the Ranch Hand TCDD exposure categories.</p> <p>RR significantly increased in the Low category (RR=1.7, 95% CI 1–2.9, P=0.03) and risk of cancer increased significantly with log(TCDD) in the combined cohort (P=0.01) after restriction to those whose last year of service was during or before 1968.</p> <p>Risk of bias tier: 1</p> |
| <p><b>Li et al. (2013).</b> High level of dioxin-TEQ in tissue is associated with Agent Orange exposure but not with biochemical recurrence after radical prostatectomy.</p> <p>Air Force Health Study (AFHS, Operation Ranch Hand) (US Veterans that served in Southeast Asia during Vietnam War)</p> | <p>Case control</p> <p>34-47 years</p> | <p>93</p> <p>M</p> <p>Mean age at outcome assessment: 57–60</p> <p>2005–2009</p> | <p>CALUX determined BEQ levels</p> <p>Abdominal <i>s.c.</i> adipose tissue</p> <p>Lipid adjusted</p> | <p>Mean (SD), Median (IQR) (pg BEQ/g fat)</p> <p><u>‘Low’ (n=46):</u><br/>12.1 (3.5),<br/>13.4 (10.1–15.0)</p> <p><u>‘High’ (n=47):</u><br/>27.7 (10.4),<br/>24.7 (19.8–31.2)</p>                                                                                                                        | <p><b>Incidence of BioChemical Recurrence (BCR) after radical prostatectomy in prostate cancer patients</b></p> <p>Exposure to Agent Orange increases the adipose level of dioxin-TEQ but neither associated with BCR after radical prostatectomy.</p> <p>Risk of bias tier: 2</p>                                                                                                                                                                                                                                                         |
| <b>Landgren et al. (2015).</b>                                                                                                                                                                                                                                                                         | Cohort                                 | 958 (Ranch Hand:                                                                 | TCDD                                                                                                 | Median (IQR)                                                                                                                                                                                                                                                                                             | <b>Risk of monoclonal gammopathy of</b>                                                                                                                                                                                                                                                                                                                                                                                                                                                                                                    |

| Reference<br>Trial or Study name<br>(Geography)                                                                                                                                                                                                              | Study Type<br>Duration                                      | Participants in the study<br>Sex<br>Age at outcome assessment (years)<br>Year of tissue sampling                        | Compounds<br>Measurement of exposure                                                                                 | Levels of exposure                                                                                                                                                                                                                    | Parameters measured and Measures of effect<br>Risk of bias tier                                                                                                                                                                                                                                                                                                                                                                                                                                                                                                                                                                                            |
|--------------------------------------------------------------------------------------------------------------------------------------------------------------------------------------------------------------------------------------------------------------|-------------------------------------------------------------|-------------------------------------------------------------------------------------------------------------------------|----------------------------------------------------------------------------------------------------------------------|---------------------------------------------------------------------------------------------------------------------------------------------------------------------------------------------------------------------------------------|------------------------------------------------------------------------------------------------------------------------------------------------------------------------------------------------------------------------------------------------------------------------------------------------------------------------------------------------------------------------------------------------------------------------------------------------------------------------------------------------------------------------------------------------------------------------------------------------------------------------------------------------------------|
| <p>Agent Orange Exposure and Monoclonal Gammopathy of Undetermined Significance: An Operation Ranch Hand Veteran Cohort Study.</p> <p>Air Force Health Study (AFHS, Operation Ranch Hand) (US Veterans that served in Southeast Asia during Vietnam War)</p> | Up to 40 years                                              | <p>479, Comparison: 479)</p> <p>M</p> <p>Median age at outcome assessment in 2002: 65</p> <p>1987, 1992, 1997, 2002</p> | <p>Blood (serum)</p> <p>Lipid adjusted</p>                                                                           | <p>(pg/g fat)</p> <p><u>Ranch Hand:</u><br/>10.5 (6.2–21.4)</p> <p><u>Comparison:</u><br/>4.1 (2.9–5.8)</p>                                                                                                                           | <p><b>undetermined significance (MGUS)</b></p> <p>Increased risk of MGUS in veterans exposed to Agent Orange. The supports and association between Agent Orange and myltiple myeloma.</p> <p>No cancer measured.</p> <p>Crude prevalence of overall MGUS:<br/>Ranch Hand: 7.1% (34 of 479)<br/>Comparison: 3.1% (15 of 479)</p> <p>Risk of bias tier: 2</p>                                                                                                                                                                                                                                                                                                |
| <p><b>Hooiveld et al. (1998).</b><br/>Second follow-up of a Dutch cohort occupationally exposed to phenoxy herbicides, chlorophenols, and contaminants.</p> <p>Dutch Herbicide Cohort (The Netherlands)</p>                                                  | <p>Cohort</p> <p>Mean duration of follow-up: 22.3 years</p> | <p>562</p> <p>M, F</p> <p>Age at outcome assessment: unclear</p> <p>1993</p>                                            | <p>TCDD (also PCDD/Fs, DL-PCBs, but relations reported only for TCDD)</p> <p>Blood (serum)</p> <p>Lipid adjusted</p> | <p>Mean measured TCDD levels (n=47) (pg/g fat)</p> <p><u>Exposed, Accident:</u><br/>No main production: 55.8<br/>Main production: 111.4</p> <p><u>Exposed, no accident:</u><br/>No main production: 5.8<br/>Main production: 22.9</p> | <p><b>Cancer mortality</b></p> <p>Increased risk of NHL (3 cases) (SMR=3.8, 95% CI 0.8–11.0). Positively associated with TCDD level.</p> <p>Increased risk for cancer of respiratory organs (RR=10.3, 95% CI 1.5–72.6). After adjustment for possible confounding factors (age, calendar period at end of follow-up, and time since first exposure/employment), risk still elevated (RR=7.5, 95% CI 1.0–56.1) (no information about smoking habits).</p> <p>Elevated risk for bladder and kidney cancer (SMR=3.9, 95% CI 1.7–7.6). The relative risk compared with non-exposed workers was unstable because there were no cases in the referent group.</p> |

| Reference<br>Trial or Study name<br>(Geography)                                                                                                                                                                                                | Study Type<br>Duration                                                             | Participants in the study<br>Sex<br>Age at outcome assessment (years)<br>Year of tissue sampling                            | Compounds<br>Measurement of exposure                               | Levels of exposure                                                                                                                                                                                                                                                                                       | Parameters measured and Measures of effect<br>Risk of bias tier                                                                                                                                                                                                                                                                                                                                                                                                                         |
|------------------------------------------------------------------------------------------------------------------------------------------------------------------------------------------------------------------------------------------------|------------------------------------------------------------------------------------|-----------------------------------------------------------------------------------------------------------------------------|--------------------------------------------------------------------|----------------------------------------------------------------------------------------------------------------------------------------------------------------------------------------------------------------------------------------------------------------------------------------------------------|-----------------------------------------------------------------------------------------------------------------------------------------------------------------------------------------------------------------------------------------------------------------------------------------------------------------------------------------------------------------------------------------------------------------------------------------------------------------------------------------|
|                                                                                                                                                                                                                                                |                                                                                    |                                                                                                                             |                                                                    | <p>Extrapolated mean levels to the time of maximum exposure using a constant half-life of 7.1 years (pg/g fat)</p> <p><u>Exposed, Accident:</u><br/>No main production: 1,059<br/>Main production: 2,148</p> <p><u>Exposed, no accident:</u><br/>No main production: 40.8<br/>Main production: 285.9</p> | <p>Workers exposed as a result of the accident showed a statistically significant increased risk for prostate cancer.</p> <p>Risk of bias tier: 2</p> <p><i>Comments:</i> Mixed exposure to phenoxyherbicides, chlorophenols and contaminants (TCDD). Cancer mortality increased in exposed group but the exposure mixed. Smoking not considered. Modelled TCDD and used this to make associations but only actually measured TCDD in 47 individuals. Numbers are too small to use.</p> |
| <p><b>Boers et al. (2012).</b> Plasma dioxin levels and cause-specific mortality in an occupational cohort of workers exposed to chlorophenoxy herbicides, chlorophenols and contaminants.</p> <p>Dutch Herbicide Cohort (The Netherlands)</p> | <p>Cohort</p> <p>Vital statistics of cohort workers was updated until Dec 2006</p> | <p>2,056</p> <p>M</p> <p>Age at outcome assessment: not reported</p> <p>Exposure in factory A in 1963 from an accident.</p> | <p>TCDD</p> <p>Blood (plasma)</p> <p>Unclear if lipid adjusted</p> | <p>Plasma TCDD levels (n=187 workers) used to develop a predictive model for TCDD back-extrapolation at the time of last exposure using a half-life of 7.1 years</p>                                                                                                                                     | <p><b>Cause-specific mortality (including all cancers and other illness/disease)</b></p> <p>There was no association between TCDD exposure and all cancer mortality.</p> <p>There was a possible link to NHL but if factory B (no TCDD) included in the analysis the association disappeared.</p> <p>Risk of bias tier: 2</p>                                                                                                                                                           |

| Reference<br>Trial or Study name<br>(Geography)                                                                                                                      | Study Type<br>Duration                            | Participants in<br>the study<br>Sex<br>Age at outcome<br>assessment<br>(years)<br>Year of tissue<br>sampling    | Compounds<br>Measurement of<br>exposure                                                                    | Levels of exposure                                                                                                     | Parameters measured and Measures of<br>effect<br>Risk of bias tier                                                                                                                                                                                                                                                                                                                                                                                                                                                                                                                                                                                                     |
|----------------------------------------------------------------------------------------------------------------------------------------------------------------------|---------------------------------------------------|-----------------------------------------------------------------------------------------------------------------|------------------------------------------------------------------------------------------------------------|------------------------------------------------------------------------------------------------------------------------|------------------------------------------------------------------------------------------------------------------------------------------------------------------------------------------------------------------------------------------------------------------------------------------------------------------------------------------------------------------------------------------------------------------------------------------------------------------------------------------------------------------------------------------------------------------------------------------------------------------------------------------------------------------------|
|                                                                                                                                                                      |                                                   | Subjects from<br>Factory B<br>considered as<br>non-exposed.<br><br>2007-2008                                    |                                                                                                            | (pg/g):<br><br>Background: ≤0.4<br>Low: 0.4-1.9<br>Medium: 1.9-9.9<br>High: ≥9.9                                       |                                                                                                                                                                                                                                                                                                                                                                                                                                                                                                                                                                                                                                                                        |
| <b>OTHER STUDIES</b>                                                                                                                                                 |                                                   |                                                                                                                 |                                                                                                            |                                                                                                                        |                                                                                                                                                                                                                                                                                                                                                                                                                                                                                                                                                                                                                                                                        |
| <b>Steenland et al. (1999).</b><br>Cancer, heart disease, and<br>diabetes in workers exposed<br>to 2,3,7,8-tetrachlorodibenzo-<br><i>p</i> -dioxin.<br><br>n/a (USA) | Cohort<br><br>Follow up:<br>around 15-57<br>years | 3,538<br><br>M<br><br>Age at outcome<br>assessment: Not<br>reported<br><br>Year of tissue<br>sampling: unclear. | TCDD<br><br>Cumulative exposure<br>scores based on JEM,<br>calibrated against<br>serum TCDD in<br>subgroup | Estimated back-<br>calculated levels<br>about 200,000 ppt-<br>years in septile 6–7<br>(e.g. 10,000 pg/g x<br>20 years) | <b>Various cancer types</b><br><br>SMR for all cancers combined:<br>1.13 (95% CI 1.02–1.25).<br><br>Statistically significant positive linear trends in<br>SMRs with increasing exposure for all cancers<br>combined and for lung cancer.<br><br>All cancers combined for the highest exposure<br>group: SRM=1.60, 95% CI 1.15–1.82).<br><br>Internal analyses with Cox regression found<br>statistically significant trends for cancer (15-year<br>lagtime).<br><br>Excess cancer limited to the highest exposed group<br>possibly 100-1,000 times normal exposure<br><br>Analyses showed high TCDD exposure resulted in<br>an excess of all cancers but there was no |

| Reference                                                                                                                                                                                                | Study Type                                 | Participants in the study                                                                                  | Compounds                                                                                | Levels of exposure                                                                                                                                                                                    | Parameters measured and Measures of effect                                                                                                                                                                                                                                                                                                                                                                                                                                                                                                                       |
|----------------------------------------------------------------------------------------------------------------------------------------------------------------------------------------------------------|--------------------------------------------|------------------------------------------------------------------------------------------------------------|------------------------------------------------------------------------------------------|-------------------------------------------------------------------------------------------------------------------------------------------------------------------------------------------------------|------------------------------------------------------------------------------------------------------------------------------------------------------------------------------------------------------------------------------------------------------------------------------------------------------------------------------------------------------------------------------------------------------------------------------------------------------------------------------------------------------------------------------------------------------------------|
| Trial or Study name (Geography)                                                                                                                                                                          | Duration                                   | Sex<br><br>Age at outcome assessment (years)<br><br>Year of tissue sampling                                | Measurement of exposure                                                                  |                                                                                                                                                                                                       | Risk of bias tier                                                                                                                                                                                                                                                                                                                                                                                                                                                                                                                                                |
|                                                                                                                                                                                                          |                                            |                                                                                                            |                                                                                          |                                                                                                                                                                                                       | specificity for any one type.<br><br>Risk of bias tier: 2                                                                                                                                                                                                                                                                                                                                                                                                                                                                                                        |
| <b>De Roos et al. (2005).</b><br>Persistent organochlorine chemicals in plasma and risk of non-Hodgkin's lymphoma<br><br>n/a (USA - Iowa, Los Angeles County, metropolitan areas of Detroit and Seattle) | Case control<br><br>n/a                    | 200 (100 untreated cases, 100 controls)<br><br>M, F<br><br>Age at outcome assessment: unclear.<br><br>1998 | 17 PCDD/Fs, 4 DL-PCBs (-77, -81, -126, -169)<br><br>Blood (plasma)<br><br>Lipid adjusted | Levels divided into quartiles:<br><br>Total pg WHO <sub>1998</sub> -TEQ/ fat:<br>≤15.12<br>>15.12-19.39<br>>19.39-29.46<br>>29.46<br><br>Different quartiles for PCDDs-TEQ, PCDFs-TEQ and DL-PCBs-TEQ | <b>Non-Hodgkin's Lymphoma (NHL)</b><br><br>Each PCDF congener associated with risk of NHL, as were total PCDFs, with 3.5-fold increased risk for the highest versus lowest quartile and a significant trend across quartiles (P=0.006).<br><br>Coplanar PCB congeners -156, -180 and -194 showed increased risk of NHL.<br><br>Total TEQ associated with NHL, with 35% increased risk per 10 TEQ pg/g fat (95% CI 1.02–1.79). Only 2 cases had detectable TCDD.<br><br>Risk of bias tier: 2<br><br><i>Comments:</i> Used multiple imputation for missing values. |
| <b>McBride et al. (2009).</b><br>Mortality in workers exposure to 2,3,7,8-tetrachlordibenzo- <i>p</i> -dioxin at a trichlorophenol plant in New Zealand.<br><br>n/a (New Zealand)                        | Cohort<br><br>Worked between 1969 and 1988 | 1,599<br><br>M, F<br><br>Age at outcome assessment: unclear<br><br>Year of tissue                          | TCDD<br><br>Blood (serum)<br><br>Not specified whether lipid adjusted                    | Current serum TCDD levels used to develop cumulative TCDD exposure estimates for the 1,599 workers                                                                                                    | 196 deaths 61 from cancer<br><br>No increased mortality due to cancer<br><br>SMR = 1.1, 95% CI, 0.9–1.4<br><br>Risk of bias tier: 2                                                                                                                                                                                                                                                                                                                                                                                                                              |

| Reference<br>Trial or Study name<br>(Geography)                                                                                                                                                    | Study Type<br>Duration                                          | Participants in the study<br>Sex<br>Age at outcome assessment (years)<br>Year of tissue sampling                                                    | Compounds<br>Measurement of exposure                                 | Levels of exposure                                                                                                                                                                                                                           | Parameters measured and Measures of effect<br>Risk of bias tier                                                                                                                                                                                                                                                                                                                                      |
|----------------------------------------------------------------------------------------------------------------------------------------------------------------------------------------------------|-----------------------------------------------------------------|-----------------------------------------------------------------------------------------------------------------------------------------------------|----------------------------------------------------------------------|----------------------------------------------------------------------------------------------------------------------------------------------------------------------------------------------------------------------------------------------|------------------------------------------------------------------------------------------------------------------------------------------------------------------------------------------------------------------------------------------------------------------------------------------------------------------------------------------------------------------------------------------------------|
| <b>Viel et al. (2011).</b><br>Increased risk of non-Hodgkin lymphoma and serum organochlorine concentrations among neighbors of a municipal solid waste incinerator.<br><br>n/a (France, Besançon) | Case control<br><br>2                                           | sampling: unclear<br>68<br>M, F<br><br>Age at outcome assessment: Not reported, however, most subjects were between 55-63 years of age.<br><br>2003 | 17 PCDD/Fs,<br>12 DL-PCBs<br><br>Blood (serum)<br><br>Lipid adjusted | Mean (pg WHO <sub>1998</sub> -TEQ/g fat)<br><br>PCDDs:<br>Cases: 13.39<br>Control 8.73<br><br>PCDFs:<br>Cases: 9.44<br>Controls: 6.27<br><br>DL-PCBs:<br>Cases: 33.13<br>Controls: 20.10<br><br>Total TEQ:<br>Cases: 55.96<br>Control: 35.10 | <b>Non-Hodgkin lymphoma (NHL)</b><br><br>Sum of PCDD showed significant increase in OR (1.12, 95% CI 1.03–1.26) linked to risk of NHL.<br><br>Serum total WHO <sub>1998</sub> -TEQ concentrations, at levels experienced by people residing in the vicinity of a polluting MSWI.<br><br>Risk of bias tier: 3                                                                                         |
| <b>Manuwald et al. (2012).</b><br>Mortality study of chemical workers exposed to dioxins: follow-up 23 years after chemical plant closure.<br><br>n/a (Germany, Hamburg)                           | Cohort<br><br>23 year follow up after a chemical plant closure. | 1,589<br>M, F<br><br>Age at outcome assessment: Unclear<br><br>Year of tissue sampling: unclear (adults)                                            | TCDD<br><br>Blood (serum)<br><br>Lipid adjusted                      | Cumulative exposure estimated from work histories and serum TCDD (lipid adjusted) in subgroup.<br><br>Median: 77 pg/g fat<br>Upper quartile: >335                                                                                            | <b>Cause-specific standardised mortality ratios</b><br><br>Increase in all-cancer mortality in men (SMR=1.37, 95% CI 1.21-1.56) specific mortality from:<br>- respiratory cancer: SMR=1.64, 95%CI 1.32–2.03,<br>- oesophageal cancer: SMR=2.56, 95%CI 1.27-4.57,<br>- rectum cancer: SMR=1.96, 95% CI 0.98–3.51.<br><br>For women, increase in breast cancer mortality (SMR=1.86, 95% CI 1.12–2.91). |



| Reference                                                                                                                                                   | Study Type                  | Participants in the study                                                   | Compounds                                                                                                                                              | Levels of exposure                                                                            | Parameters measured and Measures of effect                                                                                                                                                                                                                                                                                                                                                                                                                                                                                                                                       |
|-------------------------------------------------------------------------------------------------------------------------------------------------------------|-----------------------------|-----------------------------------------------------------------------------|--------------------------------------------------------------------------------------------------------------------------------------------------------|-----------------------------------------------------------------------------------------------|----------------------------------------------------------------------------------------------------------------------------------------------------------------------------------------------------------------------------------------------------------------------------------------------------------------------------------------------------------------------------------------------------------------------------------------------------------------------------------------------------------------------------------------------------------------------------------|
| Trial or Study name (Geography)                                                                                                                             | Duration                    | Sex<br><br>Age at outcome assessment (years)<br><br>Year of tissue sampling | Measurement of exposure                                                                                                                                |                                                                                               | Risk of bias tier                                                                                                                                                                                                                                                                                                                                                                                                                                                                                                                                                                |
|                                                                                                                                                             |                             |                                                                             |                                                                                                                                                        |                                                                                               | Risk of bias tier: 2<br><br><i>Comments:</i> One problem is that when the TCDD content was analysed from a biological sample then the SMR all cause was 0.87 and for all cancer 1.18.<br>Exposure to multiple agents including asbestos (linked to pleural cancer).                                                                                                                                                                                                                                                                                                              |
| <b>Cheng et al. (2006).</b> TCDD exposure-response analysis and risk assessment.<br><br>National Institute for Occupational Safety and Health (NIOSH) (USA) | Cohort<br><br>1942-1993     | 3,538<br><br>M<br><br>Age at outcome assessment: not reported               | TCDD<br><br>Time-dependent cumulative exposure scores were converted into estimated cumulative serum lipid concentrations (ppt).<br><br>Lipid adjusted | See Steenland et al. (1999)                                                                   | <b>Standardized mortality ratio (SMR) and incremental cancer risks at age 75</b><br><br>Reanalysis of cancer risk in the study by Steenland et al. (1999). Main difference is using a CADM model instead of a one-compartment model to estimate the TCDD levels in workers over time. The CADM model assumes faster elimination when tissue levels are high. The reanalysis still shows an association between TCDD exposure and cancer risk, but a much attenuated slope, i.e. a lower risk per pg/g-year than presented by Steenland et al. (1999)<br><br>Risk of bias tier: 2 |
| <b>Boers et al. (2010).</b> Cause-specific mortality of Dutch chlorophenoxy herbicide manufacturing workers.<br><br>n/a (The Netherlands)                   | Cohort study<br>10-41 years | 2,016<br><br>M<br><br>Mean (SD) age at entry of the                         | TCDD<br><br>Blood (serum)<br><br>Lipid adjusted                                                                                                        | (pg/g fat)<br><br>Back extrapolation of TCDD measurements in serum collected from a sample of | <b>Cause of death, including all causes and some specific cancers</b><br><br>All cancer mortality increased (HR 1.31; 95%CI 0.86 to 2.01). However, previous increased risk of NHL and respiratory cancer was not confirmed.                                                                                                                                                                                                                                                                                                                                                     |

| Reference<br>Trial or Study name<br>(Geography)                                                                                                  | Study Type<br>Duration                             | Participants in the study<br>Sex<br>Age at outcome assessment (years)<br>Year of tissue sampling | Compounds<br>Measurement of exposure                                                                 | Levels of exposure                                                                                                                                                 | Parameters measured and Measures of effect<br>Risk of bias tier                                                                                                                                                                                                                                                                                                                                                                                                                                                                                        |
|--------------------------------------------------------------------------------------------------------------------------------------------------|----------------------------------------------------|--------------------------------------------------------------------------------------------------|------------------------------------------------------------------------------------------------------|--------------------------------------------------------------------------------------------------------------------------------------------------------------------|--------------------------------------------------------------------------------------------------------------------------------------------------------------------------------------------------------------------------------------------------------------------------------------------------------------------------------------------------------------------------------------------------------------------------------------------------------------------------------------------------------------------------------------------------------|
|                                                                                                                                                  |                                                    | exposed workers from factories A and B: around 32 (9.55).<br>1993                                |                                                                                                      | exposed workers (n=47) from factory A in 1993 using a half-life of 7.1 years.<br><br>Low exposure: 7.6<br><br>Medium exposure: 608.2<br><br>High exposure: 1,841.8 | Increased risks for prostate and urinary organ cancers:<br>Prostate: HR=2.93, 95%CI 0.61-14.15<br>Bladder and kidney cancer: HR=4.2, 95%CI 0.99-17.89.<br><br>In factory A increased risk of cancer mortality was found in exposed (accident) and occasionally exposed workers. In factory B increased risk for genital organ cancer.<br><br>Calculated SMRs (Observed/Expected):<br>Bladder cancer: SMR=3.72, O/E: 9/2.42<br>Kidney cancer SMR=3.69, O/E: 8/2.17 in exposed workers. Linked to other exposures than TCDD.<br><br>Risk of bias tier: 2 |
| <b>Lin et al. (2012b).</b><br>Environmental exposure to dioxin-like compounds and the mortality risk in the U.S. population.<br><br>NHANES (USA) | Cross sectional study<br><br>4.63 (range: <1-7.67) | 5,361<br><br>M, F<br><br>Age at outcome assessment: 40–>65<br><br>1999                           | 17 PCDD/Fs, 9 DL-PCBs (3 non-ortho and 6 mono-ortho PCBs)<br><br>Blood (serum)<br><br>Lipid adjusted | Median (IQR)<br>pg WHO-TEQ /g fat<br><br>19.2 (13.3–27.9)                                                                                                          | <b>Mortality risk</b><br><br>Deaths during the follow-up period: n=242, including:<br>- 72 from cancer.<br><br>Increased mortality risk associated with logarithmically expressed total TEQs for all-cause deaths (HR=1.19, 95% CI 1.02–1.39, p=0.02).<br><br>Similar graded dose-response trends were found for cancer mortality which did not reach statistical                                                                                                                                                                                      |

| Reference                       | Study Type | Participants in the study                                           | Compounds               | Levels of exposure | Parameters measured and Measures of effect |
|---------------------------------|------------|---------------------------------------------------------------------|-------------------------|--------------------|--------------------------------------------|
| Trial or Study name (Geography) | Duration   | Sex<br>Age at outcome assessment (years)<br>Year of tissue sampling | Measurement of exposure |                    | Risk of bias tier                          |
|                                 |            |                                                                     |                         |                    | significance.<br>Risk of bias tier: 1      |

(a): Units confirmed by the authors of the study. n/a: not applicable.

## ANNEX A.9. RISK OF BIAS APPRAISAL OF EPIDEMIOLOGICAL STUDIES

### A.9.1. Studies on male reproductive effects

**Table 76.** Risk of bias appraisal of studies on effects in male reproduction (combined score of two independent appraisals). Note: appraisal of individual studies focused only on risk of bias; additional quality aspects were considered when evaluating the overall confidence in the body of evidence (see Section 2.2.1.2 of the opinion).

| <b>SPERM QUALITY</b>        |                                                                                                           |                             |                                                                                                                                                                                                                                                                                  |
|-----------------------------|-----------------------------------------------------------------------------------------------------------|-----------------------------|----------------------------------------------------------------------------------------------------------------------------------------------------------------------------------------------------------------------------------------------------------------------------------|
| <b>Dhooge et al. (2006)</b> |                                                                                                           | <b>Risk of bias tier: 1</b> |                                                                                                                                                                                                                                                                                  |
| <b>Bias domain</b>          | <b>Question</b>                                                                                           | <b>Score</b>                | <b>Judgement</b>                                                                                                                                                                                                                                                                 |
| Confounding                 | <b>KQ-A</b> - Did the study design or analysis account for important confounding and modifying variables? | +                           |                                                                                                                                                                                                                                                                                  |
| Detection                   | <b>KQ-B</b> - Can we be confident in the exposure characterisation?                                       | +                           | No individual PCB or PCDD/F congeners measured. The authors stated that inter-laboratory validation is needed for the CALUX-TEQs and that it should be considered as relative measures of exposure within the present population.                                                |
| Detection                   | <b>KQ-C</b> - Can we be confident in the outcome assessment?                                              | +                           | Probably blinded, but not stated in the paper.                                                                                                                                                                                                                                   |
| Selection                   | Did selection of study participants result in appropriate comparison groups?                              | +                           | Participants most probably not aware of their exposure levels but some of them are aware of their fertility status (proven fertile). Out of 2,487 possible male candidates the study ended up with about 100 participants. Not known whether this will results in any selection. |
| Attrition/exclusion         | Were outcome data completely reported without attrition or exclusion from analysis?                       | ++                          | Results in absence and presence of excluded subjects are presented.                                                                                                                                                                                                              |
| Selective reporting         | Were all measured outcomes reported?                                                                      | ++                          |                                                                                                                                                                                                                                                                                  |
| <b>Toft et al. (2007)</b>   |                                                                                                           | <b>Risk of bias tier: 2</b> |                                                                                                                                                                                                                                                                                  |
| <b>Bias domain</b>          | <b>Question</b>                                                                                           | <b>Score</b>                | <b>Judgement</b>                                                                                                                                                                                                                                                                 |
| Confounding                 | <b>KQ-A</b> - Did the study design or analysis account for important confounding and modifying variables? | +                           |                                                                                                                                                                                                                                                                                  |
| Detection                   | <b>KQ-B</b> - Can we be confident in the exposure characterisation?                                       | -                           | Lack of information of the applied methodology of the CALUX test                                                                                                                                                                                                                 |
| Detection                   | <b>KQ-C</b> - Can we be confident in the outcome assessment?                                              | +                           |                                                                                                                                                                                                                                                                                  |
| Selection                   | Did selection of study participants result in appropriate comparison groups?                              | -                           | Men from Greenland, Warsaw and Kharkiv were fertile (partner of pregnant woman) but this was not reported for the Swedish fishermen. Participation rate is not clear.                                                                                                            |
| Attrition/exclusion         | Were outcome data completely reported without attrition or exclusion from analysis?                       | +                           |                                                                                                                                                                                                                                                                                  |
| Selective reporting         | Were all measured outcomes reported?                                                                      | +                           |                                                                                                                                                                                                                                                                                  |
| <b>Cok et al. (2008)</b>    |                                                                                                           | <b>Risk of bias tier: 2</b> |                                                                                                                                                                                                                                                                                  |
| <b>Bias domain</b>          | <b>Question</b>                                                                                           | <b>Score</b>                | <b>Judgement</b>                                                                                                                                                                                                                                                                 |
| Confounding                 | <b>KQ-A</b> - Did the study design                                                                        | -                           | The authors have information about potential                                                                                                                                                                                                                                     |

|                                |                                                                                                           |                             |                                                                                                                                                                                                                                                                                                                                                                                                                                                                                                                                                                                                       |
|--------------------------------|-----------------------------------------------------------------------------------------------------------|-----------------------------|-------------------------------------------------------------------------------------------------------------------------------------------------------------------------------------------------------------------------------------------------------------------------------------------------------------------------------------------------------------------------------------------------------------------------------------------------------------------------------------------------------------------------------------------------------------------------------------------------------|
|                                | or analysis account for important confounding and modifying variables?                                    |                             | confounders but they do not present the distributions among the fertile and infertile groups and, in addition, due to the small numbers of participants, it was not possible to adjust for more than a few numbers of confounders simultaneously.                                                                                                                                                                                                                                                                                                                                                     |
| Detection                      | <b>KQ-B</b> - Can we be confident in the exposure characterisation?                                       | ++                          |                                                                                                                                                                                                                                                                                                                                                                                                                                                                                                                                                                                                       |
| Detection                      | <b>KQ-C</b> - Can we be confident in the outcome assessment?                                              | +                           |                                                                                                                                                                                                                                                                                                                                                                                                                                                                                                                                                                                                       |
| Selection                      | Did selection of study participants result in appropriate comparison groups?                              | -                           | Hard to know whether there were differences between the fertile and infertile men regarding characteristics of interest such as socioeconomic status, smoking, etc, as only age was described (similar mean age).                                                                                                                                                                                                                                                                                                                                                                                     |
| Attrition/exclusion            | Were outcome data completely reported without attrition or exclusion from analysis?                       | ++                          |                                                                                                                                                                                                                                                                                                                                                                                                                                                                                                                                                                                                       |
| Selective reporting            | Were all measured outcomes reported?                                                                      | ++                          |                                                                                                                                                                                                                                                                                                                                                                                                                                                                                                                                                                                                       |
| <b>Mocarelli et al. (2008)</b> |                                                                                                           | <b>Risk of bias tier: 1</b> |                                                                                                                                                                                                                                                                                                                                                                                                                                                                                                                                                                                                       |
| <b>Bias domain</b>             | <b>Question</b>                                                                                           | <b>Score</b>                | <b>Judgement</b>                                                                                                                                                                                                                                                                                                                                                                                                                                                                                                                                                                                      |
| Confounding                    | <b>KQ-A</b> - Did the study design or analysis account for important confounding and modifying variables? | +                           | Other DL-compounds not accounted for, but no reason to believe it is different for exposed and unexposed.                                                                                                                                                                                                                                                                                                                                                                                                                                                                                             |
| Detection                      | <b>KQ-B</b> - Can we be confident in the exposure characterisation?                                       | +                           | Exposure information of control group not optimal.                                                                                                                                                                                                                                                                                                                                                                                                                                                                                                                                                    |
| Detection                      | <b>KQ-C</b> - Can we be confident in the outcome assessment?                                              | ++                          | Outcome measured in accordance with WHO recommendations and blind by the same two technicians.                                                                                                                                                                                                                                                                                                                                                                                                                                                                                                        |
| Selection                      | Did selection of study participants result in appropriate comparison groups?                              | -                           | Participation rate differed between the exposed group (33%) and the control group (49%). The control group comprised healthy volunteer blood donors which might not represent the general population, and they had higher education than the Seveso participants. The question is whether the men were aware of their reproductive status, for instance if they had fathered a child and whether the fractions differed between the exposed and the control group? This information is not presented in the paper. On the other hand, the men included in the study were in general relatively young. |
| Attrition/exclusion            | Were outcome data completely reported without attrition or exclusion from analysis?                       | +                           | The reason for exclusion of 16 highly exposed men is not explained.                                                                                                                                                                                                                                                                                                                                                                                                                                                                                                                                   |
| Selective reporting            | Were all measured outcomes reported?                                                                      | ++                          |                                                                                                                                                                                                                                                                                                                                                                                                                                                                                                                                                                                                       |
| <b>Mocarelli et al. (2011)</b> |                                                                                                           | <b>Risk of bias tier: 2</b> |                                                                                                                                                                                                                                                                                                                                                                                                                                                                                                                                                                                                       |
| <b>Bias domain</b>             | <b>Question</b>                                                                                           | <b>Score</b>                | <b>Judgement</b>                                                                                                                                                                                                                                                                                                                                                                                                                                                                                                                                                                                      |
| Confounding                    | <b>KQA</b> - Did the study design or analysis account for important confounding and modifying variables?  | +                           | The study includes the most important confounders. However, the relatively low number of participants makes it unreasonable to include too many confounders in the statistical models simultaneously.                                                                                                                                                                                                                                                                                                                                                                                                 |
| Detection                      | <b>KQB</b> - Can we be confident in the exposure characterisation?                                        | -                           | The extrapolation makes the exposure characterization more uncertain.                                                                                                                                                                                                                                                                                                                                                                                                                                                                                                                                 |
| Detection                      | <b>KQC</b> - Can we be confident in the outcome assessment?                                               | +                           | Blind tests were performed by the same two technicians according to the WHO recommendations.                                                                                                                                                                                                                                                                                                                                                                                                                                                                                                          |
| Selection                      | Did selection of study participants result in                                                             | ++                          | Relatively small study with relative high fraction of non-participants among the exposed group as well as in the                                                                                                                                                                                                                                                                                                                                                                                                                                                                                      |

|                                      |                                                                                                           |                             |                                                                                                                                                                                                                                                                                                                                                                      |
|--------------------------------------|-----------------------------------------------------------------------------------------------------------|-----------------------------|----------------------------------------------------------------------------------------------------------------------------------------------------------------------------------------------------------------------------------------------------------------------------------------------------------------------------------------------------------------------|
|                                      | appropriate comparison groups?                                                                            |                             | control group (as always in male reproductive studies including semen sampling). However, hard to see that this would introduce a bias. The fractions of non-participants were similar in the two groups.                                                                                                                                                            |
| Attrition/exclusion                  | Were outcome data completely reported without attrition or exclusion from analysis?                       | ++                          |                                                                                                                                                                                                                                                                                                                                                                      |
| Selective reporting                  | Were all measured outcomes reported?                                                                      | ++                          | All outcomes reported.                                                                                                                                                                                                                                                                                                                                               |
| <b>den Hond et al. (2015)</b>        |                                                                                                           | <b>Risk of bias tier: 2</b> |                                                                                                                                                                                                                                                                                                                                                                      |
| <b>Bias domain</b>                   | <b>Question</b>                                                                                           | <b>Score</b>                | <b>Judgement</b>                                                                                                                                                                                                                                                                                                                                                     |
| Confounding                          | <b>KQ-A</b> - Did the study design or analysis account for important confounding and modifying variables? | +                           |                                                                                                                                                                                                                                                                                                                                                                      |
| Detection                            | <b>KQ-B</b> - Can we be confident in the exposure characterisation?                                       | -                           | Unclear description of methods, a large proportion of samples appear to be below the LOQ. Authors report geometric means for PCDD/Fs and PCBs of 0.19 pg BEQ/g and 0.069 pg BEQ/g. Assuming that it is fresh weight and starting with a sample amount of 5 ml with a fat content of 0.3 %, a transformation into fat weight would lead to levels that are below LOQ. |
| Detection                            | <b>KQ-C</b> - Can we be confident in the outcome assessment?                                              | +                           |                                                                                                                                                                                                                                                                                                                                                                      |
| Selection                            | Did selection of study participants result in appropriate comparison groups?                              | +                           |                                                                                                                                                                                                                                                                                                                                                                      |
| Attrition/exclusion                  | Were outcome data completely reported without attrition or exclusion from analysis?                       | +                           |                                                                                                                                                                                                                                                                                                                                                                      |
| Selective reporting                  | Were all measured outcomes reported?                                                                      | +                           |                                                                                                                                                                                                                                                                                                                                                                      |
| <b>Mínguez-Alarcón et al. (2017)</b> |                                                                                                           | <b>Risk of bias tier: 1</b> |                                                                                                                                                                                                                                                                                                                                                                      |
| <b>Bias domain</b>                   | <b>Question</b>                                                                                           | <b>Score</b>                | <b>Judgement</b>                                                                                                                                                                                                                                                                                                                                                     |
| Confounding                          | <b>KQA</b> - Did the study design or analysis account for important confounding and modifying variables?  | ++                          | Confounding factors (including PCBs) included based on a priori evidence.                                                                                                                                                                                                                                                                                            |
| Detection                            | <b>KQB</b> - Can we be confident in the exposure characterisation?                                        | ++                          | Analysed with valid methods at the CDC. Fasting blood collected.                                                                                                                                                                                                                                                                                                     |
| Detection                            | <b>KQC</b> - Can we be confident in the outcome assessment?                                               | ++                          | Double semen sample, analysed with standard methods by one technician who was blinded to the serum OC concentration.                                                                                                                                                                                                                                                 |
| Selection                            | Did selection of study participants result in appropriate comparison groups?                              | +                           | No information about the 'non-participants'                                                                                                                                                                                                                                                                                                                          |
| Attrition/exclusion                  | Were outcome data completely reported without attrition or exclusion from analysis?                       | ++                          | Adequately reported and also discussed how some exclusion might affect the results.                                                                                                                                                                                                                                                                                  |
| Selective reporting                  | Were all measured outcomes reported?                                                                      | ++                          | All measured reported. However, surprising that despite high correlations between exposure variables quite different results.                                                                                                                                                                                                                                        |
| <b>CHRYPTORCHISIM</b>                |                                                                                                           | <b>Risk of bias tier: 1</b> |                                                                                                                                                                                                                                                                                                                                                                      |
| <b>Virtanen et al. (2012)</b>        |                                                                                                           | <b>Risk of bias tier: 1</b> |                                                                                                                                                                                                                                                                                                                                                                      |
| <b>Bias domain</b>                   | <b>Question</b>                                                                                           | <b>Score</b>                | <b>Judgement</b>                                                                                                                                                                                                                                                                                                                                                     |
| Confounding                          | <b>KQ-A</b> - Did the study design                                                                        | +                           | Co-exposures not known                                                                                                                                                                                                                                                                                                                                               |

|                                  |                                                                                                           |                             |                                                                                                                                                                                                                                                                                                                                                             |
|----------------------------------|-----------------------------------------------------------------------------------------------------------|-----------------------------|-------------------------------------------------------------------------------------------------------------------------------------------------------------------------------------------------------------------------------------------------------------------------------------------------------------------------------------------------------------|
|                                  | or analysis account for important confounding and modifying variables?                                    |                             |                                                                                                                                                                                                                                                                                                                                                             |
| Detection                        | <b>KQ-B</b> - Can we be confident in the exposure characterisation?                                       | ++                          |                                                                                                                                                                                                                                                                                                                                                             |
| Detection                        | <b>KQ-C</b> - Can we be confident in the outcome assessment?                                              | +                           | Blinded                                                                                                                                                                                                                                                                                                                                                     |
| Selection                        | Did selection of study participants result in appropriate comparison groups?                              | -                           | Matched controls in Finland, gestational age (used in Finland as matching criterium) was different between cases and controls in Denmark.                                                                                                                                                                                                                   |
| Attrition/exclusion              | Were outcome data completely reported without attrition or exclusion from analysis?                       | +                           | Not reported in paper                                                                                                                                                                                                                                                                                                                                       |
| Selective reporting              | Were all measured outcomes reported?                                                                      | +                           | All reported                                                                                                                                                                                                                                                                                                                                                |
| <b>Koskenniemi et al. (2015)</b> |                                                                                                           | <b>Risk of bias tier: 1</b> |                                                                                                                                                                                                                                                                                                                                                             |
| <b>Bias domain</b>               | <b>Question</b>                                                                                           | <b>Score</b>                | <b>Judgement</b>                                                                                                                                                                                                                                                                                                                                            |
| Confounding                      | <b>KQ-A</b> - Did the study design or analysis account for important confounding and modifying variables? | +                           | The study lacks information about e.g. data on the body size of the children and the accuracy of some data might be low. In addition, information is lacking for a great proportion of the participants for specific variables such as smoking. However, there are no indications that this lacks systematically differ between the cases and the controls. |
| Detection                        | <b>KQ-B</b> - Can we be confident in the exposure characterisation?                                       | +                           | The exposures are analysed with validated methods. However, the exposures are measured at different ages (not during the pregnancy/foetal period) and it was not possible to adjust for lipid content.                                                                                                                                                      |
| Detection                        | <b>KQ-C</b> - Can we be confident in the outcome assessment?                                              | ++                          |                                                                                                                                                                                                                                                                                                                                                             |
| Selection                        | Did selection of study participants result in appropriate comparison groups?                              | ++                          | Although this is a small study and selected groups due to recruitment of cases and controls at a paediatric surgery and thereby maybe loss of the possibility to generalize the results, this will not result in selection bias.                                                                                                                            |
| Attrition/exclusion              | Were outcome data completely reported without attrition or exclusion from analysis?                       | ++                          |                                                                                                                                                                                                                                                                                                                                                             |
| Selective reporting              | Were all measured outcomes reported?                                                                      | ++                          | Only TEQs and sums were analysed to avoid multiple comparisons which sounds reasonable                                                                                                                                                                                                                                                                      |
| <b>PUBERTAL DEVELOPMENT</b>      |                                                                                                           | <b>Risk of bias tier: 2</b> |                                                                                                                                                                                                                                                                                                                                                             |
| <b>Den Hond et al. (2002)</b>    |                                                                                                           | <b>Risk of bias tier: 2</b> |                                                                                                                                                                                                                                                                                                                                                             |
| <b>Bias domain</b>               | <b>Question</b>                                                                                           | <b>Score</b>                | <b>Judgement</b>                                                                                                                                                                                                                                                                                                                                            |
| Confounding                      | <b>KQ-A</b> - Did the study design or analysis account for important confounding and modifying variables? | +                           |                                                                                                                                                                                                                                                                                                                                                             |
| Detection                        | <b>KQ-B</b> - Can we be confident in the exposure characterisation?                                       | -                           | CALUX started with 2.5 ml serum. No LOQ given, but large proportion of the results appear to be at or below the normal LOQ for the method                                                                                                                                                                                                                   |
| Detection                        | <b>KQ-C</b> - Can we be confident in the outcome assessment?                                              | +                           | Indirect that assessors were blinded to exposure. Four physicians performed staging, three of them participated in validation study, kappa in good agreement                                                                                                                                                                                                |
| Selection                        | Did selection of study participants result in appropriate comparison groups?                              | +                           | 58.3 % participation rate. However, no obvious differences between participants and non-participants according to the information in the paper                                                                                                                                                                                                              |

|                              |                                                                                                           |                             |                                                                                                                                                                                                                                                                                   |
|------------------------------|-----------------------------------------------------------------------------------------------------------|-----------------------------|-----------------------------------------------------------------------------------------------------------------------------------------------------------------------------------------------------------------------------------------------------------------------------------|
| Attrition/<br>exclusion      | Were outcome data completely reported without attrition or exclusion from analysis?                       | +                           |                                                                                                                                                                                                                                                                                   |
| Selective reporting          | Were all measured outcomes reported?                                                                      | +                           |                                                                                                                                                                                                                                                                                   |
| <b>Leijs et al. (2008)</b>   |                                                                                                           | <b>Risk of bias tier: 2</b> |                                                                                                                                                                                                                                                                                   |
| <b>Bias domain</b>           | <b>Question</b>                                                                                           | <b>Score</b>                | <b>Judgement</b>                                                                                                                                                                                                                                                                  |
| Confounding                  | <b>KQ-A</b> - Did the study design or analysis account for important confounding and modifying variables? | -                           | Confounding not assessed. Due to the small number of participants (n=12) it is not possible to take confounders into account in a proper way.                                                                                                                                     |
| Detection                    | <b>KQ-B</b> - Can we be confident in the exposure characterisation?                                       | ++                          |                                                                                                                                                                                                                                                                                   |
| Detection                    | <b>KQ-C</b> - Can we be confident in the outcome assessment?                                              | +                           | Although some data were collected via a questionnaire which might question the quality of data there are no reason to believe that this will introduce a systematic error.                                                                                                        |
| Selection                    | Did selection of study participants result in appropriate comparison groups?                              | +                           | The fraction of non-participants is relatively high and final number of included participants is low. However, the participants are most probably not aware of the exposure levels.                                                                                               |
| Attrition/<br>exclusion      | Were outcome data completely reported without attrition or exclusion from analysis?                       | +                           | Not all reported (e.g. testicular volume not shown, just reported as not associated) and reasons why excluded from age at first ejaculation not given. Y axis fig 2 1nd 3 wrong                                                                                                   |
| Selective reporting          | Were all measured outcomes reported?                                                                      | ++                          |                                                                                                                                                                                                                                                                                   |
| <b>Korrick et al. (2011)</b> |                                                                                                           | <b>Risk of bias tier: 1</b> |                                                                                                                                                                                                                                                                                   |
| <b>Bias domain</b>           | <b>Question</b>                                                                                           | <b>Score</b>                | <b>Judgement</b>                                                                                                                                                                                                                                                                  |
| Confounding                  | <b>KQA</b> - Did the study design or analysis account for important confounding and modifying variables?  | +                           | Adjusted for total PCB, adjusted for lead. No obvious confounders are missing.                                                                                                                                                                                                    |
| Detection                    | <b>KQB</b> - Can we be confident in the exposure characterisation?                                        | ++                          | Samples collected in a standardized way (fasting) and analysed at CDC with well validated methods.                                                                                                                                                                                |
| Detection                    | <b>KQC</b> - Can we be confident in the outcome assessment?                                               | ++                          | Standardized physical examinations by a single endocrinologist without knowledge of the boys exposure.                                                                                                                                                                            |
| Selection                    | Did selection of study participants result in appropriate comparison groups?                              | ++                          | All boys in town invited, high participation rate among the eligible.                                                                                                                                                                                                             |
| Attrition/<br>exclusion      | Were outcome data completely reported without attrition or exclusion from analysis?                       | ++                          |                                                                                                                                                                                                                                                                                   |
| Selective reporting          | Were all measured outcomes reported?                                                                      | ++                          |                                                                                                                                                                                                                                                                                   |
| <b>Humblet et al. (2011)</b> |                                                                                                           | <b>Risk of bias tier: 1</b> |                                                                                                                                                                                                                                                                                   |
| <b>Bias domain</b>           | <b>Question</b>                                                                                           | <b>Score</b>                | <b>Judgement</b>                                                                                                                                                                                                                                                                  |
| Confounding                  | <b>KQ-A</b> - Did the study design or analysis account for important confounding and modifying variables? | ++                          | Adjusted for covariates and confounders in different models                                                                                                                                                                                                                       |
| Detection                    | <b>KQ-B</b> - Can we be confident in the exposure characterisation?                                       | +                           | The boy's exposure was measured by maternal blood sample taken at 9-10 years, as proxy for prenatal and lactational exposure. Factors that affect maternal level after giving birth (number of later births, breastfeeding) was not taken into account. This would however rather |



|                            |                                                                                                          |                             |                                                                                                                                                                                                 |
|----------------------------|----------------------------------------------------------------------------------------------------------|-----------------------------|-------------------------------------------------------------------------------------------------------------------------------------------------------------------------------------------------|
| Detection                  | <b>KQ-C</b> - Can we be confident in the outcome assessment?                                             | ++                          | under- than overestimate any effects.<br>Analysed with standard methods blinded to the serum OC concentration.                                                                                  |
| Selection                  | Did selection of study participants result in appropriate comparison groups?                             | ++                          | Prospective population cohort, 90% of the eligible families agreed to participate.                                                                                                              |
| Attrition/<br>exclusion    | Were outcome data completely reported without attrition or exclusion from analysis?                      | ++                          |                                                                                                                                                                                                 |
| Selective reporting        | Were all measured outcomes reported?                                                                     | ++                          |                                                                                                                                                                                                 |
| <b>Su et al. (2012)</b>    |                                                                                                          | <b>Risk of bias tier: 2</b> |                                                                                                                                                                                                 |
| <b>Bias domain</b>         | <b>Question</b>                                                                                          | <b>Score</b>                | <b>Judgement</b>                                                                                                                                                                                |
| Confounding                | <b>KQA</b> - Did the study design or analysis account for important confounding and modifying variables? | -                           | Not described and not reasonable to adjust for in such a small study.                                                                                                                           |
| Detection                  | <b>KQB</b> - Can we be confident in the exposure characterisation?                                       | +                           |                                                                                                                                                                                                 |
| Detection                  | <b>KQC</b> - Can we be confident in the outcome assessment?                                              | +                           | No information on blinding                                                                                                                                                                      |
| Selection                  | Did selection of study participants result in appropriate comparison groups?                             | -                           | Originally n=250. The basis for including only 56 (33 girls) is not explained.                                                                                                                  |
| Attrition/<br>exclusion    | Were outcome data completely reported without attrition or exclusion from analysis?                      | -                           | Insufficient information                                                                                                                                                                        |
| Selective reporting        | Were all measured outcomes reported?                                                                     | +                           | All reported                                                                                                                                                                                    |
| <b>Croes et al. (2014)</b> |                                                                                                          | <b>Risk of bias tier: 2</b> |                                                                                                                                                                                                 |
| <b>Bias domain</b>         | <b>Question</b>                                                                                          | <b>Score</b>                | <b>Judgement</b>                                                                                                                                                                                |
| Confounding                | <b>KQA</b> - Did the study design or analysis account for important confounding and modifying variables? | +                           | Information about potential confounders provided, age and BMI adjusted.                                                                                                                         |
| Detection                  | <b>KQB</b> - Can we be confident in the exposure characterisation?                                       | +                           | DR-CALUX. Incomplete description in this paper. Reference to previous paper.                                                                                                                    |
| Detection                  | <b>KQC</b> - Can we be confident in the outcome assessment?                                              | -                           | Insufficient information of assessment of pubertal development, in particular for males.                                                                                                        |
| Selection                  | Did selection of study participants result in appropriate comparison groups?                             | -                           | Different recruitment protocol and participation rate between the three regions. The regions have different local sources to dioxins and DL-PCBs. Relatively high fraction of non-participants. |
| Attrition/<br>exclusion    | Were outcome data completely reported without attrition or exclusion from analysis?                      | +                           | Incomplete description                                                                                                                                                                          |
| Selective reporting        | Were all measured outcomes reported?                                                                     | +                           | Only statistically significant associations presented.                                                                                                                                          |
| <b>Burns et al. (2016)</b> |                                                                                                          | <b>Risk of bias tier: 1</b> |                                                                                                                                                                                                 |
| <b>Bias domain</b>         | <b>Question</b>                                                                                          | <b>Score</b>                | <b>Judgement</b>                                                                                                                                                                                |
| Confounding                | <b>KQA</b> - Did the study design or analysis account for important confounding and modifying variables? | ++                          | Confounding factors included based on a priori evidence and analysed in a proper way (co-exposures with pesticides not assessed).                                                               |
| Detection                  | <b>KQB</b> - Can we be confident                                                                         | ++                          | Analysed with valid methods at the CDC. Fasting blood                                                                                                                                           |

|                     |                                                                                     |    |                                                                                                                                                              |
|---------------------|-------------------------------------------------------------------------------------|----|--------------------------------------------------------------------------------------------------------------------------------------------------------------|
|                     | in the exposure characterisation?                                                   |    | collected.                                                                                                                                                   |
| Detection           | <b>KQC</b> - Can we be confident in the outcome assessment?                         | ++ | Analysed with standard methods by one technician who was blinded to the serum OC concentration.                                                              |
| Selection           | Did selection of study participants result in appropriate comparison groups?        | +  | No information about the "non-participants" (i.e. the initial recruitment to the study).                                                                     |
| Attrition/exclusion | Were outcome data completely reported without attrition or exclusion from analysis? | ++ | Adequately reported and also discussed how some exclusion might affect the results. Table 1 indicates that the numbers with missing data were relatively few |
| Selective reporting | Were all measured outcomes reported?                                                | ++ | All measured reported.                                                                                                                                       |

### A.9.2. Studies on female reproductive effects

**Table 77.** Risk of bias appraisal of studies on effects in female reproduction (combined score of two independent appraisals). Note: appraisal of individual studies focused only on risk of bias; additional quality aspects were considered when evaluating the overall confidence in the body of evidence (see Section 2.2.1.2 of the opinion).

| <b>ENDOMETRIOSIS</b>           |                                                                                                          |                             |                                                                                                                                                                                                                                                                                                                                                  |
|--------------------------------|----------------------------------------------------------------------------------------------------------|-----------------------------|--------------------------------------------------------------------------------------------------------------------------------------------------------------------------------------------------------------------------------------------------------------------------------------------------------------------------------------------------|
| <b>Pauwels et al. (2001)</b>   |                                                                                                          | <b>Risk of bias tier: 2</b> |                                                                                                                                                                                                                                                                                                                                                  |
| <b>Bias domain</b>             | <b>Question</b>                                                                                          | <b>Score</b>                | <b>Judgement</b>                                                                                                                                                                                                                                                                                                                                 |
| Confounding                    | <b>KQA</b> - Did the study design or analysis account for important confounding and modifying variables? | ++                          | Small study and not possible to take all confounders into account simultaneously.                                                                                                                                                                                                                                                                |
| Detection                      | <b>KQB</b> - Can we be confident in the exposure characterisation?                                       | -                           | There are doubts on the validity of the "CALUX based TEQ levels", because of the high uncertainty associated with low sample weight for analysis (1-1.5 mL). The limit of detection is given as 32 fg TEQ/well. A conversion to pg TEQ/g fat is not reported. The distribution of TEQ-levels depicted in Figure 1 goes down to -20 pg TEQ/g fat. |
| Detection                      | <b>KQC</b> - Can we be confident in the outcome assessment?                                              | ++                          |                                                                                                                                                                                                                                                                                                                                                  |
| Selection                      | Did selection of study participants result in appropriate comparison groups?                             | ++                          |                                                                                                                                                                                                                                                                                                                                                  |
| Attrition/exclusion            | Were outcome data completely reported without attrition or exclusion from analysis?                      | ++                          |                                                                                                                                                                                                                                                                                                                                                  |
| Selective reporting            | Were all measured outcomes reported?                                                                     | ++                          |                                                                                                                                                                                                                                                                                                                                                  |
| <b>Eskenazi et al. (2002a)</b> |                                                                                                          | <b>Risk of bias tier: 2</b> |                                                                                                                                                                                                                                                                                                                                                  |
| <b>Bias domain</b>             | <b>Question</b>                                                                                          | <b>Score</b>                | <b>Judgement</b>                                                                                                                                                                                                                                                                                                                                 |
| Confounding                    | <b>KQA</b> - Did the study design or analysis account for important confounding and modifying variables? | +                           | 81% participation (n=751). 54 virgins excluded, of cultural reasons. Younger women underrepresented, not sufficiently controlled by age.                                                                                                                                                                                                         |
| Detection                      | <b>KQB</b> - Can we be                                                                                   | +                           | Co-exposure to other PCDD/Fs and DL-PCBs not                                                                                                                                                                                                                                                                                                     |

|                               |                                                                                                          |                             |                                                                                                                                                                                                                                                 |
|-------------------------------|----------------------------------------------------------------------------------------------------------|-----------------------------|-------------------------------------------------------------------------------------------------------------------------------------------------------------------------------------------------------------------------------------------------|
|                               | confident in the exposure characterisation?                                                              |                             | accounted for.                                                                                                                                                                                                                                  |
| Detection                     | <b>KQC</b> - Can we be confident in the outcome assessment?                                              | -                           | Only 19 cases, by biopsy or ultrasound (validated method). May have missed some cases in the Group of women with uncertain diagnose, may have underestimated the risk.                                                                          |
| Selection                     | Did selection of study participants result in appropriate comparison groups?                             | +                           | The recruitment of the cohort is well-defined and clearly described.                                                                                                                                                                            |
| Attrition/exclusion           | Were outcome data completely reported without attrition or exclusion from analysis?                      | +                           | 93 women excluded because they refused ultrasound, they may have endometriosis without symptoms. Laparoscopy performed only on subset of women.                                                                                                 |
| Selective reporting           | Were all measured outcomes reported?                                                                     | ++                          | Both verified and uncertain cases reported                                                                                                                                                                                                      |
| <b>Fierens et al. (2003)</b>  |                                                                                                          | <b>Risk of bias tier: 2</b> |                                                                                                                                                                                                                                                 |
| <b>Bias domain</b>            | <b>Question</b>                                                                                          | <b>Score</b>                | <b>Judgement</b>                                                                                                                                                                                                                                |
| Confounding                   | <b>KQA</b> - Did the study design or analysis account for important confounding and modifying variables? | -                           | Co-exposure not addressed (may differ for the exposure groups recruited). Not possible to adjust for confounders with so few cases.                                                                                                             |
| Detection                     | <b>KQB</b> - Can we be confident in the exposure characterisation?                                       | +                           | No information about LOQ                                                                                                                                                                                                                        |
| Detection                     | <b>KQC</b> - Can we be confident in the outcome assessment?                                              | -                           | Based on answers from a questionnaire and controls may have endometriosis as well.                                                                                                                                                              |
| Selection                     | Did selection of study participants result in appropriate comparison groups?                             | -                           | Controls may have endometriosis (undiagnosed). Recruited on volunteer basis via a mail. Hard to know who participated.                                                                                                                          |
| Attrition/exclusion           | Were outcome data completely reported without attrition or exclusion from analysis?                      | +                           |                                                                                                                                                                                                                                                 |
| Selective reporting           | Were all measured outcomes reported?                                                                     | +                           |                                                                                                                                                                                                                                                 |
| <b>de Felip et al. (2004)</b> |                                                                                                          | <b>Risk of bias tier: 2</b> |                                                                                                                                                                                                                                                 |
| <b>Bias domain</b>            | <b>Question</b>                                                                                          | <b>Score</b>                | <b>Judgement</b>                                                                                                                                                                                                                                |
| Confounding                   | <b>KQA</b> - Did the study design or analysis account for important confounding and modifying variables? | -                           | Age range between 18 and 40 years is too wide to control for factors related to exposure. Due to the low number of participants and the fact that the samples were pooled it was not possible to adjust for confounding.                        |
| Detection                     | <b>KQB</b> - Can we be confident in the exposure characterisation?                                       | --                          | Pooled samples, n=6, which means that no individual exposure measures were obtained.                                                                                                                                                            |
| Detection                     | <b>KQC</b> - Can we be confident in the outcome assessment?                                              | ++                          | The outcome was defined according to strict criteria and validated.                                                                                                                                                                             |
| Selection                     | Did selection of study participants result in appropriate comparison groups?                             | +                           | Were a priori suspect of different gynaecological conditions. Only women with comparably dietary habits enrolled, no information about those excluded. In addition, to have enough blood individual specimen were pooled into different groups. |
| Attrition/exclusion           | Were outcome data completely reported without attrition or exclusion from analysis?                      | +                           | None excluded.                                                                                                                                                                                                                                  |
| Selective                     | Were all measured                                                                                        | ++                          |                                                                                                                                                                                                                                                 |

| reporting                    | outcomes reported?                                                                                       |                             |                                                                                                                                                                                          |
|------------------------------|----------------------------------------------------------------------------------------------------------|-----------------------------|------------------------------------------------------------------------------------------------------------------------------------------------------------------------------------------|
| <b>Heilier et al. (2005)</b> |                                                                                                          | <b>Risk of bias tier: 1</b> |                                                                                                                                                                                          |
| Bias domain                  | Question                                                                                                 | Score                       | Judgement                                                                                                                                                                                |
| Confounding                  | <b>KQA</b> - Did the study design or analysis account for important confounding and modifying variables? | +                           | Adjusted only for age and BMI, other confounders not significantly associated (smoking, number of children, duration of breast feeding)                                                  |
| Detection                    | <b>KQB</b> - Can we be confident in the exposure characterisation?                                       | +                           | Analysed with validated methods.                                                                                                                                                         |
| Detection                    | <b>KQC</b> - Can we be confident in the outcome assessment?                                              | +                           | Histology provided for all cases. However, Controls may have endometriosis.                                                                                                              |
| Selection                    | Did selection of study participants result in appropriate comparison groups?                             | +                           | Positive that Controls are not from fertility clinic. However, Controls may have endometriosis.                                                                                          |
| Attrition/exclusion          | Were outcome data completely reported without attrition or exclusion from analysis?                      | +                           |                                                                                                                                                                                          |
| Selective reporting          | Were all measured outcomes reported?                                                                     | ++                          |                                                                                                                                                                                          |
| <b>Tsukino et al. (2005)</b> |                                                                                                          | <b>Risk of bias tier: 1</b> |                                                                                                                                                                                          |
| Bias domain                  | Question                                                                                                 | Score                       | Judgement                                                                                                                                                                                |
| Confounding                  | <b>KQA</b> - Did the study design or analysis account for important confounding and modifying variables? | ++                          |                                                                                                                                                                                          |
| Detection                    | <b>KQB</b> - Can we be confident in the exposure characterisation?                                       | +                           | May have been affected by high LOQ for some congeners (treated in analyses as LOQ/2) but the LOQ is not given.                                                                           |
| Detection                    | <b>KQC</b> - Can we be confident in the outcome assessment?                                              | ++                          |                                                                                                                                                                                          |
| Selection                    | Did selection of study participants result in appropriate comparison groups?                             | ++                          |                                                                                                                                                                                          |
| Attrition/exclusion          | Were outcome data completely reported without attrition or exclusion from analysis?                      | ++                          |                                                                                                                                                                                          |
| Selective reporting          | Were all measured outcomes reported?                                                                     | ++                          |                                                                                                                                                                                          |
| <b>Niskar et al. (2009)</b>  |                                                                                                          | <b>Risk of bias tier: 2</b> |                                                                                                                                                                                          |
| Bias domain                  | Question                                                                                                 | Score                       | Judgement                                                                                                                                                                                |
| Confounding                  | <b>KQA</b> - Did the study design or analysis account for important confounding and modifying variables? | +                           | Different sets of covariates adjusted for in different models.                                                                                                                           |
| Detection                    | <b>KQB</b> - Can we be confident in the exposure characterisation?                                       | -                           | Low volume of blood analyzed (7-15 mL) and low sensitivity. TCDD detected in 7 of 124 samples. (LR) TCDD only detected in 7 out of 124 samples (<6%).                                    |
| Detection                    | <b>KQC</b> - Can we be confident in the outcome assessment?                                              | +                           | Half of the controls were not confirmed non-endometriosis. However, separate analysis including only included confirmed controls gave similar results but the power was then even lower. |

|                              |                                                                                                          |                             |                                                                                                                                                                                                                                                                          |
|------------------------------|----------------------------------------------------------------------------------------------------------|-----------------------------|--------------------------------------------------------------------------------------------------------------------------------------------------------------------------------------------------------------------------------------------------------------------------|
| Selection                    | Did selection of study participants result in appropriate comparison groups?                             | +                           | Participants seeking help for infertility, half of the controls (33) were not confirmed as non-endometriosis (had infertile partner (N=27) or ovulation problems (n=7)). However, including only the 30 confirmed non-endometriosis controls did not affect the outcome. |
| Attrition/exclusion          | Were outcome data completely reported without attrition or exclusion from analysis?                      | ++                          | All reported or explained                                                                                                                                                                                                                                                |
| Selective reporting          | Were all measured outcomes reported?                                                                     | ++                          | All reported                                                                                                                                                                                                                                                             |
| <b>Porpora et al. (2009)</b> |                                                                                                          | <b>Risk of bias tier: 1</b> |                                                                                                                                                                                                                                                                          |
| <b>Bias domain</b>           | <b>Question</b>                                                                                          | <b>Score</b>                | <b>Judgement</b>                                                                                                                                                                                                                                                         |
| Confounding                  | <b>KQA</b> - Did the study design or analysis account for important confounding and modifying variables? | ++                          |                                                                                                                                                                                                                                                                          |
| Detection                    | <b>KQB</b> - Can we be confident in the exposure characterisation?                                       | ++                          |                                                                                                                                                                                                                                                                          |
| Detection                    | <b>KQC</b> - Can we be confident in the outcome assessment?                                              | ++                          | Laparoscopy performed in all participants.                                                                                                                                                                                                                               |
| Selection                    | Did selection of study participants result in appropriate comparison groups?                             | ++                          | Small differences in age and BMI between cases and Controls adjusted for in analysis.                                                                                                                                                                                    |
| Attrition/exclusion          | Were outcome data completely reported without attrition or exclusion from analysis?                      | ++                          | None removed.                                                                                                                                                                                                                                                            |
| Selective reporting          | Were all measured outcomes reported?                                                                     | ++                          |                                                                                                                                                                                                                                                                          |
| <b>Simsa et al. (2010)</b>   |                                                                                                          | <b>Risk of bias tier: 2</b> |                                                                                                                                                                                                                                                                          |
| <b>Bias domain</b>           | <b>Question</b>                                                                                          | <b>Score</b>                | <b>Judgement</b>                                                                                                                                                                                                                                                         |
| Confounding                  | <b>KQA</b> - Did the study design or analysis account for important confounding and modifying variables? | -                           | Included only age as a confounder in the analysis due to lack of information about other potentially important confounders.                                                                                                                                              |
| Detection                    | <b>KQB</b> - Can we be confident in the exposure characterisation?                                       | -                           | CALUX based on only 5 ml plasma. Much lower CALUX TEQ than expected based on pilot study.                                                                                                                                                                                |
| Detection                    | <b>KQC</b> - Can we be confident in the outcome assessment?                                              | ++                          | All cases and controls with laparoscopy and histology.                                                                                                                                                                                                                   |
| Selection                    | Did selection of study participants result in appropriate comparison groups?                             | +                           | Patients recruited because of infertility and investigation by laparoscopy. Other criteria or response rates not described. Period of sampling not mentioned. No information about non-participants.                                                                     |
| Attrition/exclusion          | Were outcome data completely reported without attrition or exclusion from analysis?                      | ++                          | All reported                                                                                                                                                                                                                                                             |
| Selective reporting          | Were all measured outcomes reported?                                                                     | ++                          | All reported                                                                                                                                                                                                                                                             |
| <b>Cai et al. (2011)</b>     |                                                                                                          | <b>Risk of bias tier: 2</b> |                                                                                                                                                                                                                                                                          |
| <b>Bias domain</b>           | <b>Question</b>                                                                                          | <b>Score</b>                | <b>Judgement</b>                                                                                                                                                                                                                                                         |
| Confounding                  | <b>KQA</b> - Did the study design or analysis                                                            | -                           | Too few women included in the study for having a chance to adjust for potential confounders in a                                                                                                                                                                         |

|                                      |                                                                                                          |                             |                                                                                                                                                           |
|--------------------------------------|----------------------------------------------------------------------------------------------------------|-----------------------------|-----------------------------------------------------------------------------------------------------------------------------------------------------------|
|                                      | account for important confounding and modifying variables?                                               |                             | reasonable way. Although not statistically significant, the controls were about three years older and have two units higher BMI compared to the controls. |
| Detection                            | <b>KQB</b> - Can we be confident in the exposure characterisation?                                       | -                           | Ascites not commonly analysed, low agreement with blood for PCDD.                                                                                         |
| Detection                            | <b>KQC</b> - Can we be confident in the outcome assessment?                                              | +                           | Performed in a systematic and well-defined way.                                                                                                           |
| Selection                            | Did selection of study participants result in appropriate comparison groups?                             | +                           | Insufficient information.                                                                                                                                 |
| Attrition/exclusion                  | Were outcome data completely reported without attrition or exclusion from analysis?                      | +                           |                                                                                                                                                           |
| Selective reporting                  | Were all measured outcomes reported?                                                                     | +                           |                                                                                                                                                           |
| <b>Martínez-Zamora et al. (2015)</b> |                                                                                                          | <b>Risk of bias tier: 1</b> |                                                                                                                                                           |
| <b>Bias domain</b>                   | <b>Question</b>                                                                                          | <b>Score</b>                | <b>Judgement</b>                                                                                                                                          |
| Confounding                          | <b>KQA</b> - Did the study design or analysis account for important confounding and modifying variables? | +                           | Low numbers and lack of information on socioeconomic and lifestyle factors.                                                                               |
| Detection                            | <b>KQB</b> - Can we be confident in the exposure characterisation?                                       | ++                          | Adipose tissue, mostly above LOQ.                                                                                                                         |
| Detection                            | <b>KQC</b> - Can we be confident in the outcome assessment?                                              | ++                          | Strict criteria for cases and controls.                                                                                                                   |
| Selection                            | Did selection of study participants result in appropriate comparison groups?                             | +                           | Next laparoscopy patient selected. Similar age in cases and controls.                                                                                     |
| Attrition/exclusion                  | Were outcome data completely reported without attrition or exclusion from analysis?                      | ++                          | Few excluded, well explained                                                                                                                              |
| Selective reporting                  | Were all measured outcomes reported?                                                                     | ++                          |                                                                                                                                                           |
| <b>Ploteau et al. (2017)</b>         |                                                                                                          | <b>Risk of bias tier: 1</b> |                                                                                                                                                           |
| <b>Bias domain</b>                   | <b>Question</b>                                                                                          | <b>Score</b>                | <b>Judgement</b>                                                                                                                                          |
| Confounding                          | <b>KQA</b> - Did the study design or analysis account for important confounding and modifying variables? | +                           |                                                                                                                                                           |
| Detection                            | <b>KQB</b> - Can we be confident in the exposure characterisation?                                       | ++                          |                                                                                                                                                           |
| Detection                            | <b>KQC</b> - Can we be confident in the outcome assessment?                                              | ++                          |                                                                                                                                                           |
| Selection                            | Did selection of study participants result in appropriate comparison groups?                             | +                           |                                                                                                                                                           |
| Attrition/exclusion                  | Were outcome data completely reported without attrition or                                               | ++                          |                                                                                                                                                           |

|                               |                                                                                                          |                             |                                                                                                                                                                                                                       |
|-------------------------------|----------------------------------------------------------------------------------------------------------|-----------------------------|-----------------------------------------------------------------------------------------------------------------------------------------------------------------------------------------------------------------------|
|                               | exclusion from analysis?                                                                                 |                             |                                                                                                                                                                                                                       |
| Selective reporting           | Were all measured outcomes reported?                                                                     | ++                          |                                                                                                                                                                                                                       |
| <b>PUBERTAL DEVELOPMENT</b>   |                                                                                                          |                             |                                                                                                                                                                                                                       |
| <b>Warner et al. (2004)</b>   |                                                                                                          | <b>Risk of bias tier: 1</b> |                                                                                                                                                                                                                       |
| <b>Bias domain</b>            | <b>Question</b>                                                                                          | <b>Score</b>                | <b>Judgement</b>                                                                                                                                                                                                      |
| Confounding                   | <b>KQA</b> - Did the study design or analysis account for important confounding and modifying variables? | +                           | Several confounders considered.                                                                                                                                                                                       |
| Detection                     | <b>KQB</b> - Can we be confident in the exposure characterisation?                                       | +                           | Uncertainty with back-calculation for 20 participants.                                                                                                                                                                |
| Detection                     | <b>KQC</b> - Can we be confident in the outcome assessment?                                              | +                           | Self-reported, but most likely remembered by women.                                                                                                                                                                   |
| Selection                     | Did selection of study participants result in appropriate comparison groups?                             | +                           |                                                                                                                                                                                                                       |
| Attrition/exclusion           | Were outcome data completely reported without attrition or exclusion from analysis?                      | +                           | Well reported.                                                                                                                                                                                                        |
| Selective reporting           | Were all measured outcomes reported?                                                                     | ++                          | All reported.                                                                                                                                                                                                         |
| <b>Den Hond et al. (2002)</b> |                                                                                                          | <b>Risk of bias tier: 2</b> |                                                                                                                                                                                                                       |
| <b>Bias domain</b>            | <b>Question</b>                                                                                          | <b>Score</b>                | <b>Judgement</b>                                                                                                                                                                                                      |
| Confounding                   | <b>KQA</b> - Did the study design or analysis account for important confounding and modifying variables? | +                           |                                                                                                                                                                                                                       |
| Detection                     | <b>KQB</b> - Can we be confident in the exposure characterisation?                                       | -                           | CALUX started with 2.5 ml serum. No LOQ given, but a large proportion of the results appear to be at or below the normal LOQ for the method.                                                                          |
| Detection                     | <b>KQC</b> - Can we be confident in the outcome assessment?                                              | +                           | Indirect that the assessors were blinded to exposure (although probably not regarding geographical areas). Four physicians performed staging; three of them participated in validation study kappa in good agreement. |
| Selection                     | Did selection of study participants result in appropriate comparison groups?                             | +                           | Participants and non-participants had similar age and sex distribution, parental social class, regional distribution and distance from main pollution source when applicable.                                         |
| Attrition/exclusion           | Were outcome data completely reported without attrition or exclusion from analysis?                      | +                           |                                                                                                                                                                                                                       |
| Selective reporting           | Were all measured outcomes reported?                                                                     | +                           |                                                                                                                                                                                                                       |
| <b>Su et al. (2012)</b>       |                                                                                                          | <b>Risk of bias tier: 2</b> |                                                                                                                                                                                                                       |
| <b>Bias domain</b>            | <b>Question</b>                                                                                          | <b>Score</b>                | <b>Judgement</b>                                                                                                                                                                                                      |
| Confounding                   | <b>KQA</b> - Did the study design or analysis account for important confounding and modifying variables? | -                           | Not described and not reasonable to adjust for in such a small study.                                                                                                                                                 |
| Detection                     | <b>KQB</b> - Can we be confident in the exposure characterisation?                                       | +                           |                                                                                                                                                                                                                       |



| Detection                                   | <b>KQC</b> - Can we be confident in the outcome assessment?                                              | +                           | No information on blinding.                                                                                                                                                                                                         |
|---------------------------------------------|----------------------------------------------------------------------------------------------------------|-----------------------------|-------------------------------------------------------------------------------------------------------------------------------------------------------------------------------------------------------------------------------------|
| Selection                                   | Did selection of study participants result in appropriate comparison groups?                             | -                           | Originally n=250. The basis for including only 56 (33 girls) is not explained. Limited information about participants/non-participants in paper.                                                                                    |
| Attrition/<br>exclusion                     | Were outcome data completely reported without attrition or exclusion from analysis?                      | -                           | Insufficient information.                                                                                                                                                                                                           |
| Selective reporting                         | Were all measured outcomes reported?                                                                     | +                           | All reported.                                                                                                                                                                                                                       |
| <b>Croes et al. (2014)</b>                  |                                                                                                          | <b>Risk of bias tier: 2</b> |                                                                                                                                                                                                                                     |
| Bias domain                                 | Question                                                                                                 | Score                       | Judgement                                                                                                                                                                                                                           |
| Confounding                                 | <b>KQA</b> - Did the study design or analysis account for important confounding and modifying variables? | +                           | Information about potential confounders..                                                                                                                                                                                           |
| Detection                                   | <b>KQB</b> - Can we be confident in the exposure characterisation?                                       | +                           | DR-CALUX. Incomplete description in this paper, Reference to previous paper.                                                                                                                                                        |
| Detection                                   | <b>KQC</b> - Can we be confident in the outcome assessment?                                              | -                           | Insufficient information of assessment of pubertal development.                                                                                                                                                                     |
| Selection                                   | Did selection of study participants result in appropriate comparison groups?                             | -                           | Different recruitment protocol and participation rate between the three regions. The regions have different local sources to dioxins and DL-PCBs. Relatively high fraction of non-participants and limited information about those. |
| Attrition/<br>exclusion                     | Were outcome data completely reported without attrition or exclusion from analysis?                      | +                           | Incomplete description                                                                                                                                                                                                              |
| Selective reporting                         | Were all measured outcomes reported?                                                                     | +                           | Only statistically significant associations are presented                                                                                                                                                                           |
| <b>OTHER EFFECTS IN FEMALE REPRODUCTION</b> |                                                                                                          |                             |                                                                                                                                                                                                                                     |
| <b>den Hond et al. (2002)</b>               |                                                                                                          | <b>Risk of bias tier: 2</b> |                                                                                                                                                                                                                                     |
| Bias domain                                 | Question                                                                                                 | Score                       | Judgement                                                                                                                                                                                                                           |
| Confounding                                 | <b>KQA</b> - Did the study design or analysis account for important confounding and modifying variables? | +                           |                                                                                                                                                                                                                                     |
| Detection                                   | <b>KQB</b> - Can we be confident in the exposure characterisation?                                       | -                           | CALUX started with 2.5 ml serum. No LOQ given, but large proportion of the results appear to be at or below the normal LOQ for the method..                                                                                         |
| Detection                                   | <b>KQC</b> - Can we be confident in the outcome assessment?                                              | +                           | Indirect that the assessors were blinded to exposure (although probably not regarding geographical areas). Four physicians performed staging; three of them participated in validation study kappa in good agreement.               |
| Selection                                   | Did selection of study participants result in appropriate comparison groups?                             | +                           | Participants and non-participants had similar age and sex distribution, parental social class, regional distribution and distance from main pollution source when applicable.                                                       |
| Attrition/<br>exclusion                     | Were outcome data completely reported without attrition or exclusion from analysis?                      | +                           |                                                                                                                                                                                                                                     |
| Selective                                   | Were all measured                                                                                        | +                           |                                                                                                                                                                                                                                     |



| reporting                      | outcomes reported?                                                                                       |                             |                                                                                                                                                               |
|--------------------------------|----------------------------------------------------------------------------------------------------------|-----------------------------|---------------------------------------------------------------------------------------------------------------------------------------------------------------|
| <b>Eskenazi et al. (2002b)</b> |                                                                                                          | <b>Risk of bias tier: 1</b> |                                                                                                                                                               |
| Bias domain                    | Question                                                                                                 | Score                       | Judgement                                                                                                                                                     |
| Confounding                    | <b>KQA</b> - Did the study design or analysis account for important confounding and modifying variables? | +                           |                                                                                                                                                               |
| Detection                      | <b>KQB</b> - Can we be confident in the exposure characterisation?                                       | +                           | TCDD back-calculated to 1976 Levels for 26 out of 301 women. Co-exposure to other dioxins and DL-PCBs not accounted for.                                      |
| Detection                      | <b>KQC</b> - Can we be confident in the outcome assessment?                                              | +                           | Self-reported menstrual cycle characteristics, but no reason the report should be biased in any direction. How valid are the information about the past year? |
| Selection                      | Did selection of study participants result in appropriate comparison groups?                             | +                           | Due to different exclusions only 310 out of 981 women were included in the study.                                                                             |
| Attrition/exclusion            | Were outcome data completely reported without attrition or exclusion from analysis?                      | +                           |                                                                                                                                                               |
| Selective reporting            | Were all measured outcomes reported?                                                                     | ++                          | All reported                                                                                                                                                  |
| <b>Chao et al. (2007)</b>      |                                                                                                          | <b>Risk of bias tier: 2</b> |                                                                                                                                                               |
| Bias domain                    | Question                                                                                                 | Score                       | Judgement                                                                                                                                                     |
| Confounding                    | <b>KQA</b> - Did the study design or analysis account for important confounding and modifying variables? | +                           |                                                                                                                                                               |
| Detection                      | <b>KQB</b> - Can we be confident in the exposure characterisation?                                       | +                           | Placenta samples analysed                                                                                                                                     |
| Detection                      | <b>KQC</b> - Can we be confident in the outcome assessment?                                              | -                           | Self-reported and possible recall bias. No knowledge about the dioxin levels.                                                                                 |
| Selection                      | Did selection of study participants result in appropriate comparison groups?                             | +                           | Insufficient information and only about 27% of the original women were included (randomly selected).                                                          |
| Attrition/exclusion            | Were outcome data completely reported without attrition or exclusion from analysis?                      | -                           | Insufficient information.                                                                                                                                     |
| Selective reporting            | Were all measured outcomes reported?                                                                     | +                           | Menstrual cycle changes not mentioned as hypothesis/purpose. Some outcomes just reported as no associations and data were not shown.                          |
| <b>Warner et al. (2007)</b>    |                                                                                                          | <b>Risk of bias tier: 1</b> |                                                                                                                                                               |
| Bias domain                    | Question                                                                                                 | Score                       | Judgement                                                                                                                                                     |
| Confounding                    | <b>KQA</b> - Did the study design or analysis account for important confounding and modifying variables? | +                           |                                                                                                                                                               |
| Detection                      | <b>KQB</b> - Can we be confident in the exposure characterisation?                                       | +                           | For 27 women (out of 363), exposure was back-calculated to levels in 1976. What about co-exposures? And what about high back-ground exposure?                 |
| Detection                      | <b>KQC</b> - Can we be confident in the outcome assessment?                                              | +                           |                                                                                                                                                               |

|                               |                                                                                                          |                             |                                                                                                                                                                                                                              |
|-------------------------------|----------------------------------------------------------------------------------------------------------|-----------------------------|------------------------------------------------------------------------------------------------------------------------------------------------------------------------------------------------------------------------------|
| Selection                     | Did selection of study participants result in appropriate comparison groups?                             | +                           |                                                                                                                                                                                                                              |
| Attrition/<br>exclusion       | Were outcome data completely reported without attrition or exclusion from analysis?                      | +                           |                                                                                                                                                                                                                              |
| Selective reporting           | Were all measured outcomes reported?                                                                     | ++                          |                                                                                                                                                                                                                              |
| <b>Eskenazi et al. (2010)</b> |                                                                                                          | <b>Risk of bias tier: 1</b> |                                                                                                                                                                                                                              |
| <b>Bias domain</b>            | <b>Question</b>                                                                                          | <b>Score</b>                | <b>Judgement</b>                                                                                                                                                                                                             |
| Confounding                   | <b>KQA</b> - Did the study design or analysis account for important confounding and modifying variables? | +                           |                                                                                                                                                                                                                              |
| Detection                     | <b>KQB</b> - Can we be confident in the exposure characterisation?                                       | +                           | Both exposure soon after explosion and calculated to conception gave similar associations. However, accuracy of calculated exposure is unknown. Background exposure comes in addition.                                       |
| Detection                     | <b>KQC</b> - Can we be confident in the outcome assessment?                                              | +                           | Retrospectively collected. Sometimes many years after. However, "women can fairly accurately report their time to conception" (Joffe)                                                                                        |
| Selection                     | Did selection of study participants result in appropriate comparison groups?                             | +                           |                                                                                                                                                                                                                              |
| Attrition/<br>exclusion       | Were outcome data completely reported without attrition or exclusion from analysis?                      | +                           |                                                                                                                                                                                                                              |
| Selective reporting           | Were all measured outcomes reported?                                                                     | ++                          |                                                                                                                                                                                                                              |
| <b>Eskenazi et al. (2007)</b> |                                                                                                          | <b>Risk of bias tier: 1</b> |                                                                                                                                                                                                                              |
| <b>Bias domain</b>            | <b>Question</b>                                                                                          | <b>Score</b>                | <b>Judgement</b>                                                                                                                                                                                                             |
| Confounding                   | <b>KQA</b> - Did the study design or analysis account for important confounding and modifying variables? | +                           | Co-exposure to other DL-compounds could not be addressed                                                                                                                                                                     |
| Detection                     | <b>KQB</b> - Can we be confident in the exposure characterisation?                                       | +                           | Back-calculation of TCDD Level in 1976 performed for 67 of the women out of 956.                                                                                                                                             |
| Detection                     | <b>KQC</b> - Can we be confident in the outcome assessment?                                              | +                           | Few women that were pre-menarcheal in 1976 have reached an age where leiomyoma can be expected, this may underestimate the risk if these women were in a susceptible age. Self-reported data completed with medical records. |
| Selection                     | Did selection of study participants result in appropriate comparison groups?                             | +                           | High participation rate in eligible population.                                                                                                                                                                              |
| Attrition/<br>exclusion       | Were outcome data completely reported without attrition or exclusion from analysis?                      | +                           | Ultrasound analysed for a subset.                                                                                                                                                                                            |
| Selective reporting           | Were all measured outcomes reported?                                                                     | ++                          |                                                                                                                                                                                                                              |
| <b>Eskenazi et al. (2005)</b> |                                                                                                          | <b>Risk of bias tier: 2</b> |                                                                                                                                                                                                                              |
| <b>Bias domain</b>            | <b>Question</b>                                                                                          | <b>Score</b>                | <b>Judgement</b>                                                                                                                                                                                                             |
| Confounding                   | <b>KQA</b> - Did the study                                                                               | +                           | Co-exposure from other DL-compounds not fully                                                                                                                                                                                |

|                     |                                                                                     |    |                                                                                                                                                               |
|---------------------|-------------------------------------------------------------------------------------|----|---------------------------------------------------------------------------------------------------------------------------------------------------------------|
|                     | design or analysis account for important confounding and modifying variables?       |    | known.                                                                                                                                                        |
| Detection           | <b>KQB</b> - Can we be confident in the exposure characterisation?                  | +  | Serum levels were back-calculated to 1976 Levels for 41 women. In models re-run excluding women with post-1977 blood samples, associations were strengthened. |
| Detection           | <b>KQC</b> - Can we be confident in the outcome assessment?                         | -  | Retrospective recall of age of natural menopause has been reported to have moderately high reliability.                                                       |
| Selection           | Did selection of study participants result in appropriate comparison groups?        | +  | High participation rate, all from Seveso zone A or B.                                                                                                         |
| Attrition/exclusion | Were outcome data completely reported without attrition or exclusion from analysis? | +  |                                                                                                                                                               |
| Selective reporting | Were all measured outcomes reported?                                                | ++ |                                                                                                                                                               |

### A.9.3. Studies on birth outcomes

**Table 78.** Risk of bias appraisal of studies on birth outcomes (studies on sex ratio: combined score of two independent appraisals. Studies on birth weight and other birth outcomes: scores corresponding to one appraisal). Note: appraisal of individual studies focused only on risk of bias; additional quality aspects were considered when evaluating the overall confidence in the body of evidence (see Section 2.2.1.2 of the opinion).

| <b>SEX RATIO</b>               |                                                                                                          |                             |                                                                                                          |
|--------------------------------|----------------------------------------------------------------------------------------------------------|-----------------------------|----------------------------------------------------------------------------------------------------------|
| <b>Mocarelli et al. (2000)</b> |                                                                                                          | <b>Risk of bias tier: 1</b> |                                                                                                          |
| <b>Bias domain</b>             | <b>Question</b>                                                                                          | <b>Score</b>                | <b>Judgement</b>                                                                                         |
| Confounding                    | <b>KQA</b> - Did the study design or analysis account for important confounding and modifying variables? | +                           | There are no strong confounders for sex ratio which could have biased the results in the present study.  |
| Detection                      | <b>KQB</b> - Can we be confident in the exposure characterisation?                                       | +                           | Imputation of some missing data, but repeated calculations with only analysed data gave similar results. |
| Detection                      | <b>KQC</b> - Can we be confident in the outcome assessment?                                              | ++                          |                                                                                                          |
| Selection                      | Did selection of study participants result in appropriate comparison groups?                             | ++                          | Subjects were from the same area and there are no reasons to believe that there would be any selection.  |
| Attrition/exclusion            | Were outcome data completely reported without attrition or exclusion from analysis?                      | ++                          | All recorded by municipalities' censuses.                                                                |
| Selective reporting            | Were all measured outcomes reported?                                                                     | ++                          |                                                                                                          |
| <b>Schnorr et al. (2001)</b>   |                                                                                                          | <b>Risk of bias tier: 2</b> |                                                                                                          |
| <b>Bias domain</b>             | <b>Question</b>                                                                                          | <b>Score</b>                | <b>Judgement</b>                                                                                         |
| Confounding                    | <b>KQA</b> - Did the study design or analysis account for important confounding and modifying variables? | +                           | Confounders assessed                                                                                     |
| Detection                      | <b>KQB</b> - Can we be confident in the                                                                  | -                           | Back calculation to exposure at                                                                          |

|                                              |                                                                                                          |                             |                                                                                                                                                                                                                                                                                                                                                                |
|----------------------------------------------|----------------------------------------------------------------------------------------------------------|-----------------------------|----------------------------------------------------------------------------------------------------------------------------------------------------------------------------------------------------------------------------------------------------------------------------------------------------------------------------------------------------------------|
|                                              | exposure characterisation?                                                                               |                             | conception does not take liver sequestration into account (I believe). Would give under-estimation of exposure and/or exposure misclassification. Long time span, background changing during the years.                                                                                                                                                        |
| Detection                                    | <b>KQC</b> - Can we be confident in the outcome assessment?                                              | ++                          | Child sex easy to remember                                                                                                                                                                                                                                                                                                                                     |
| Selection                                    | Did selection of study participants result in appropriate comparison groups?                             | -                           | Relatively high differences in participants rates between the exposed group and the referents                                                                                                                                                                                                                                                                  |
| Attrition/exclusion                          | Were outcome data completely reported without attrition or exclusion from analysis?                      | +                           |                                                                                                                                                                                                                                                                                                                                                                |
| Selective reporting                          | Were all measured outcomes reported?                                                                     | +                           |                                                                                                                                                                                                                                                                                                                                                                |
| <b>Ryan et al. (2002)</b>                    |                                                                                                          | <b>Risk of bias tier: 2</b> |                                                                                                                                                                                                                                                                                                                                                                |
| <b>Bias domain</b>                           | <b>Question</b>                                                                                          | <b>Score</b>                | <b>Judgement</b>                                                                                                                                                                                                                                                                                                                                               |
| Confounding                                  | <b>KQA</b> - Did the study design or analysis account for important confounding and modifying variables? | +                           | Co-exposure in workers different from general population but this is not expected to affect sex ratio.                                                                                                                                                                                                                                                         |
| Detection                                    | <b>KQB</b> - Can we be confident in the exposure characterisation?                                       | -                           | Long time between exposure and sampling. Level at conception not known. Different sampling time in different cohorts.                                                                                                                                                                                                                                          |
| Detection                                    | <b>KQC</b> - Can we be confident in the outcome assessment?                                              | ++                          |                                                                                                                                                                                                                                                                                                                                                                |
| Selection                                    | Did selection of study participants result in appropriate comparison groups?                             | ++                          | Although the study size is relatively small (especially when separate analyses were performed, e.g. for "mother only" in the 2,4,5-T-cohort) there is no obvious risk for selection bias. The comparison group is based on five individual years between the period 1959-1996, i.e. a quite long period, but the sex ratio is very much in line with expected. |
| Attrition/exclusion                          | Were outcome data completely reported without attrition or exclusion from analysis?                      | ++                          | The data is reported in a proper way.                                                                                                                                                                                                                                                                                                                          |
| Selective reporting                          | Were all measured outcomes reported?                                                                     | ++                          |                                                                                                                                                                                                                                                                                                                                                                |
| <b>'t Mannetje et al. (2017)</b>             |                                                                                                          | <b>Risk of bias tier: 2</b> |                                                                                                                                                                                                                                                                                                                                                                |
| <b>Bias domain</b>                           | <b>Question</b>                                                                                          | <b>Score</b>                | <b>Judgement</b>                                                                                                                                                                                                                                                                                                                                               |
| Confounding                                  | <b>KQA</b> - Did the study design or analysis account for important confounding and modifying variables? | +                           |                                                                                                                                                                                                                                                                                                                                                                |
| Detection                                    | <b>KQB</b> - Can we be confident in the exposure characterisation?                                       | -                           | Levels measured at least 24 years after exposure, high uncertainty associated with back-calculation.                                                                                                                                                                                                                                                           |
| Detection                                    | <b>KQC</b> - Can we be confident in the outcome assessment?                                              | ++                          |                                                                                                                                                                                                                                                                                                                                                                |
| Selection                                    | Did selection of study participants result in appropriate comparison groups?                             | +                           |                                                                                                                                                                                                                                                                                                                                                                |
| Attrition/exclusion                          | Were outcome data completely reported without attrition or exclusion from analysis?                      | +                           |                                                                                                                                                                                                                                                                                                                                                                |
| Selective reporting                          | Were all measured outcomes reported?                                                                     | +                           |                                                                                                                                                                                                                                                                                                                                                                |
| <b>BIRTH WEIGHT AND OTHER BIRTH OUTCOMES</b> |                                                                                                          |                             |                                                                                                                                                                                                                                                                                                                                                                |

| <b>Tsukimori et al. (2013)</b>   |                                                                                                          | <b>Risk of bias tier: 2</b> |                                                                                                          |
|----------------------------------|----------------------------------------------------------------------------------------------------------|-----------------------------|----------------------------------------------------------------------------------------------------------|
| <b>Bias domain</b>               | <b>Question</b>                                                                                          | <b>Score</b>                | <b>Judgement</b>                                                                                         |
| Confounding                      | <b>KQA</b> - Did the study design or analysis account for important confounding and modifying variables? | -                           | Small study, not possible to take all potential into account                                             |
| Detection                        | <b>KQB</b> - Can we be confident in the exposure characterisation?                                       | -                           | Estimated via back-calculations from samples collected up to 40 years after the pregnancy.               |
| Detection                        | <b>KQC</b> - Can we be confident in the outcome assessment?                                              | +                           |                                                                                                          |
| Selection                        | Did selection of study participants result in appropriate comparison groups?                             | -                           | Out of 737 officially registered Yusho patients the study ended up with 64 mothers                       |
| Attrition/exclusion              | Were outcome data completely reported without attrition or exclusion from analysis?                      | +                           |                                                                                                          |
| Selective reporting              | Were all measured outcomes reported?                                                                     | ++                          |                                                                                                          |
| <b>Tsukimori et al. (2012)</b>   |                                                                                                          | <b>Risk of bias tier: 2</b> |                                                                                                          |
| <b>Bias domain</b>               | <b>Question</b>                                                                                          | <b>Score</b>                | <b>Judgement</b>                                                                                         |
| Confounding                      | <b>KQA</b> - Did the study design or analysis account for important confounding and modifying variables? | +                           |                                                                                                          |
| Detection                        | <b>KQB</b> - Can we be confident in the exposure characterisation?                                       | -                           | Estimated up to 40 years after the pregnancy                                                             |
| Detection                        | <b>KQC</b> - Can we be confident in the outcome assessment?                                              | ++                          |                                                                                                          |
| Selection                        | Did selection of study participants result in appropriate comparison groups?                             | -                           | The study has about 50% non-participants.                                                                |
| Attrition/exclusion              | Were outcome data completely reported without attrition or exclusion from analysis?                      | +                           |                                                                                                          |
| Selective reporting              | Were all measured outcomes reported?                                                                     | ++                          |                                                                                                          |
| <b>Konishi et al. (2009)</b>     |                                                                                                          | <b>Risk of bias tier: 2</b> |                                                                                                          |
| <b>Bias domain</b>               | <b>Question</b>                                                                                          | <b>Score</b>                | <b>Judgement</b>                                                                                         |
| Confounding                      | <b>KQA</b> - Did the study design or analysis account for important confounding and modifying variables? | -                           | There was no association with smoking, which make the quality of the confounding variables questionable. |
| Detection                        | <b>KQB</b> - Can we be confident in the exposure characterisation?                                       | +                           |                                                                                                          |
| Detection                        | <b>KQC</b> - Can we be confident in the outcome assessment?                                              | ++                          |                                                                                                          |
| Selection                        | Did selection of study participants result in appropriate comparison groups?                             | -                           | Little/no information about the non-participants.                                                        |
| Attrition/exclusion              | Were outcome data completely reported without attrition or exclusion from analysis?                      | ++                          |                                                                                                          |
| Selective reporting              | Were all measured outcomes reported?                                                                     | +                           |                                                                                                          |
| <b>Halldorsson et al. (2009)</b> |                                                                                                          | <b>Risk of bias tier: 2</b> |                                                                                                          |
| <b>Bias domain</b>               | <b>Question</b>                                                                                          | <b>Score</b>                | <b>Judgement</b>                                                                                         |
| Confounding                      | <b>KQA</b> - Did the study design or analysis account for important confounding and modifying variables? | +                           |                                                                                                          |

|                                   |                                                                                                          |                             |                                                                                                                     |
|-----------------------------------|----------------------------------------------------------------------------------------------------------|-----------------------------|---------------------------------------------------------------------------------------------------------------------|
| Detection                         | <b>KQB</b> - Can we be confident in the exposure characterisation?                                       | -                           | As stated by the authors the CALUX assay can potentially be distorted by contamination from PAHs.                   |
| Detection                         | <b>KQC</b> - Can we be confident in the outcome assessment?                                              | ++                          |                                                                                                                     |
| Selection                         | Did selection of study participants result in appropriate comparison groups?                             | +                           |                                                                                                                     |
| Attrition/<br>exclusion           | Were outcome data completely reported without attrition or exclusion from analysis?                      | ++                          |                                                                                                                     |
| Selective reporting               | Were all measured outcomes reported?                                                                     | ++                          |                                                                                                                     |
| <b>Papadopoulou et al. (2013)</b> |                                                                                                          | <b>Risk of bias tier: 2</b> |                                                                                                                     |
| <b>Bias domain</b>                | <b>Question</b>                                                                                          | <b>Score</b>                | <b>Judgement</b>                                                                                                    |
| Confounding                       | <b>KQA</b> - Did the study design or analysis account for important confounding and modifying variables? | +                           |                                                                                                                     |
| Detection                         | <b>KQB</b> - Can we be confident in the exposure characterisation?                                       | -                           | Based on FFQ and dioxin levels in food.                                                                             |
| Detection                         | <b>KQC</b> - Can we be confident in the outcome assessment?                                              | +                           |                                                                                                                     |
| Selection                         | Did selection of study participants result in appropriate comparison groups?                             | +                           | Less than 40 % participated in MoBA.                                                                                |
| Attrition/<br>exclusion           | Were outcome data completely reported without attrition or exclusion from analysis?                      | ++                          |                                                                                                                     |
| Selective reporting               | Were all measured outcomes reported?                                                                     | ++                          |                                                                                                                     |
| <b>Papadopoulou et al. (2014)</b> |                                                                                                          | <b>Risk of bias tier: 2</b> |                                                                                                                     |
| <b>Bias domain</b>                | <b>Question</b>                                                                                          | <b>Score</b>                | <b>Judgement</b>                                                                                                    |
| Confounding                       | <b>KQA</b> - Did the study design or analysis account for important confounding and modifying variables? | +                           |                                                                                                                     |
| Detection                         | <b>KQB</b> - Can we be confident in the exposure characterisation?                                       | -                           | CALUX bioassay                                                                                                      |
| Detection                         | <b>KQC</b> - Can we be confident in the outcome assessment?                                              | ++                          |                                                                                                                     |
| Selection                         | Did selection of study participants result in appropriate comparison groups?                             | +                           | Limited information about non-participants.                                                                         |
| Attrition/<br>exclusion           | Were outcome data completely reported without attrition or exclusion from analysis?                      | +                           |                                                                                                                     |
| Selective reporting               | Were all measured outcomes reported?                                                                     | ++                          |                                                                                                                     |
| <b>Lawson et al. (2004)</b>       |                                                                                                          | <b>Risk of bias tier: 2</b> |                                                                                                                     |
| <b>Bias domain</b>                | <b>Question</b>                                                                                          | <b>Score</b>                | <b>Judgement</b>                                                                                                    |
| Confounding                       | <b>KQA</b> - Did the study design or analysis account for important confounding and modifying variables? | +                           |                                                                                                                     |
| Detection                         | <b>KQB</b> - Can we be confident in the exposure characterisation?                                       | -                           | TCDD measured several years after the pregnancies.                                                                  |
| Detection                         | <b>KQC</b> - Can we be confident in the outcome assessment?                                              | +                           | Self-reported                                                                                                       |
| Selection                         | Did selection of study participants result in appropriate comparison groups?                             | -                           | Could not calculate a true participation rate for the male referents which raise the question about selection bias. |

|                                    |                                                                                                          |                             |                                                                                                        |
|------------------------------------|----------------------------------------------------------------------------------------------------------|-----------------------------|--------------------------------------------------------------------------------------------------------|
| Attrition/<br>exclusion            | Were outcome data completely reported without attrition or exclusion from analysis?                      | +                           |                                                                                                        |
| Selective reporting                | Were all measured outcomes reported?                                                                     | ++                          |                                                                                                        |
| <b>Wohlfart-Veje et al. (2014)</b> |                                                                                                          | <b>Risk of bias tier: 1</b> |                                                                                                        |
| <b>Bias domain</b>                 | <b>Question</b>                                                                                          | <b>Score</b>                | <b>Judgement</b>                                                                                       |
| Confounding                        | <b>KQA</b> - Did the study design or analysis account for important confounding and modifying variables? | +                           | Limited information regarding other pollutants.                                                        |
| Detection                          | <b>KQB</b> - Can we be confident in the exposure characterisation?                                       | +                           |                                                                                                        |
| Detection                          | <b>KQC</b> - Can we be confident in the outcome assessment?                                              | ++                          |                                                                                                        |
| Selection                          | Did selection of study participants result in appropriate comparison groups?                             | +                           | Limited information about non-participants.                                                            |
| Attrition/<br>exclusion            | Were outcome data completely reported without attrition or exclusion from analysis?                      | ++                          |                                                                                                        |
| Selective reporting                | Were all measured outcomes reported?                                                                     | ++                          |                                                                                                        |
| <b>Vartiainen et al. (1998)</b>    |                                                                                                          | <b>Risk of bias tier: 1</b> |                                                                                                        |
| <b>Bias domain</b>                 | <b>Question</b>                                                                                          | <b>Score</b>                | <b>Judgement</b>                                                                                       |
| Confounding                        | <b>KQA</b> - Did the study design or analysis account for important confounding and modifying variables? | +                           |                                                                                                        |
| Detection                          | <b>KQB</b> - Can we be confident in the exposure characterisation?                                       | +                           |                                                                                                        |
| Detection                          | <b>KQC</b> - Can we be confident in the outcome assessment?                                              | ++                          |                                                                                                        |
| Selection                          | Did selection of study participants result in appropriate comparison groups?                             | -                           | Only about half of those who initially indicated that would participate did participate.               |
| Attrition/<br>exclusion            | Were outcome data completely reported without attrition or exclusion from analysis?                      | +                           |                                                                                                        |
| Selective reporting                | Were all measured outcomes reported?                                                                     | ++                          |                                                                                                        |
| <b>Tajimi et al. (2005)</b>        |                                                                                                          | <b>Risk of bias tier: 2</b> |                                                                                                        |
| <b>Bias domain</b>                 | <b>Question</b>                                                                                          | <b>Score</b>                | <b>Judgement</b>                                                                                       |
| Confounding                        | <b>KQA</b> - Did the study design or analysis account for important confounding and modifying variables? | -                           | No associations between smoking and birth weight, which makes the quality of the confounders doubtful. |
| Detection                          | <b>KQB</b> - Can we be confident in the exposure characterisation?                                       | +                           |                                                                                                        |
| Detection                          | <b>KQC</b> - Can we be confident in the outcome assessment?                                              | ++                          |                                                                                                        |
| Selection                          | Did selection of study participants result in appropriate comparison groups?                             | -                           | No information about non-participants or participation rate.                                           |
| Attrition/<br>exclusion            | Were outcome data completely reported without attrition or exclusion from analysis?                      | -                           | No information about it.                                                                               |
| Selective reporting                | Were all measured outcomes reported?                                                                     | -                           | The results were presented in two steps and all measured were only presented in step 1.                |
| <b>Govarts et al. (2016)</b>       |                                                                                                          | <b>Risk of bias tier: 2</b> |                                                                                                        |



| Bias domain                    | Question                                                                                                 | Score                       | Judgement                                                                                                        |
|--------------------------------|----------------------------------------------------------------------------------------------------------|-----------------------------|------------------------------------------------------------------------------------------------------------------|
| Confounding                    | <b>KQA</b> - Did the study design or analysis account for important confounding and modifying variables? | +                           |                                                                                                                  |
| Detection                      | <b>KQB</b> - Can we be confident in the exposure characterisation?                                       | -                           | Based on CALUX                                                                                                   |
| Detection                      | <b>KQC</b> - Can we be confident in the outcome assessment?                                              | ++                          |                                                                                                                  |
| Selection                      | Did selection of study participants result in appropriate comparison groups?                             | +                           |                                                                                                                  |
| Attrition/exclusion            | Were outcome data completely reported without attrition or exclusion from analysis?                      | +                           |                                                                                                                  |
| Selective reporting            | Were all measured outcomes reported?                                                                     | +                           |                                                                                                                  |
| <b>Tsukimori et al. (2008)</b> |                                                                                                          | <b>Risk of bias tier: 2</b> |                                                                                                                  |
| Bias domain                    | Question                                                                                                 | Score                       | Judgement                                                                                                        |
| Confounding                    | <b>KQA</b> - Did the study design or analysis account for important confounding and modifying variables? | -                           | Information collected in different ways (face-to-face interviews, mailed questionnaire, telephone interviews.    |
| Detection                      | <b>KQB</b> - Can we be confident in the exposure characterisation?                                       | -                           | Based on back-calculations                                                                                       |
| Detection                      | <b>KQC</b> - Can we be confident in the outcome assessment?                                              | -                           | Information collected in different ways (face-to-face interviews, mailed questionnaire, telephone interviews...) |
| Selection                      | Did selection of study participants result in appropriate comparison groups?                             | -                           | Due to different reasons, relatively many non-participants.                                                      |
| Attrition/exclusion            | Were outcome data completely reported without attrition or exclusion from analysis?                      | +                           |                                                                                                                  |
| Selective reporting            | Were all measured outcomes reported?                                                                     | ++                          |                                                                                                                  |
| <b>Eskenazi et al. (2003)</b>  |                                                                                                          | <b>Risk of bias tier: 1</b> |                                                                                                                  |
| Bias domain                    | Question                                                                                                 | Score                       | Judgement                                                                                                        |
| Confounding                    | <b>KQA</b> - Did the study design or analysis account for important confounding and modifying variables? | +                           |                                                                                                                  |
| Detection                      | <b>KQB</b> - Can we be confident in the exposure characterisation?                                       | +                           |                                                                                                                  |
| Detection                      | <b>KQC</b> - Can we be confident in the outcome assessment?                                              | +                           |                                                                                                                  |
| Selection                      | Did selection of study participants result in appropriate comparison groups?                             | +                           |                                                                                                                  |
| Attrition/exclusion            | Were outcome data completely reported without attrition or exclusion from analysis?                      | +                           |                                                                                                                  |
| Selective reporting            | Were all measured outcomes reported?                                                                     | ++                          |                                                                                                                  |
| <b>Wesselink et al. (2014)</b> |                                                                                                          | <b>Risk of bias tier: 1</b> |                                                                                                                  |
| Bias domain                    | Question                                                                                                 | Score                       | Judgement                                                                                                        |
| Confounding                    | <b>KQA</b> - Did the study design or analysis account for important confounding and modifying variables? | ++                          |                                                                                                                  |
| Detection                      | <b>KQB</b> - Can we be confident in the                                                                  | +                           | The exposure at pregnancy had to rely                                                                            |



|                               |                                                                                                          |                             |                                                                                               |
|-------------------------------|----------------------------------------------------------------------------------------------------------|-----------------------------|-----------------------------------------------------------------------------------------------|
| Detection                     | exposure characterisation?<br><b>KQC</b> - Can we be confident in the outcome assessment?                | +                           | on models<br>The outcomes were self-reported and sometimes many years after pregnancy         |
| Selection                     | Did selection of study participants result in appropriate comparison groups?                             | ++                          |                                                                                               |
| Attrition/<br>exclusion       | Were outcome data completely reported without attrition or exclusion from analysis?                      | ++                          |                                                                                               |
| Selective reporting           | Were all measured outcomes reported?                                                                     | ++                          |                                                                                               |
| <b>Michalek et al. (1998)</b> |                                                                                                          | <b>Risk of bias tier: 2</b> |                                                                                               |
| <b>Bias domain</b>            | <b>Question</b>                                                                                          | <b>Score</b>                | <b>Judgement</b>                                                                              |
| Confounding                   | <b>KQA</b> - Did the study design or analysis account for important confounding and modifying variables? | +                           |                                                                                               |
| Detection                     | <b>KQB</b> - Can we be confident in the exposure characterisation?                                       | -                           | Most often based samples collected many years after conception.                               |
| Detection                     | <b>KQC</b> - Can we be confident in the outcome assessment?                                              | +                           |                                                                                               |
| Selection                     | Did selection of study participants result in appropriate comparison groups?                             | +                           |                                                                                               |
| Attrition/<br>exclusion       | Were outcome data completely reported without attrition or exclusion from analysis?                      | +                           |                                                                                               |
| Selective reporting           | Were all measured outcomes reported?                                                                     | ++                          |                                                                                               |
| <b>Schnorr et al. (2001)</b>  |                                                                                                          | <b>Risk of bias tier: 2</b> |                                                                                               |
| <b>Bias domain</b>            | <b>Question</b>                                                                                          | <b>Score</b>                | <b>Judgement</b>                                                                              |
| Confounding                   | <b>KQA</b> - Did the study design or analysis account for important confounding and modifying variables? | +                           | Confounders assessed.                                                                         |
| Detection                     | <b>KQB</b> - Can we be confident in the exposure characterisation?                                       | -                           | Estimated based in a kinetic model                                                            |
| Detection                     | <b>KQC</b> - Can we be confident in the outcome assessment?                                              | -                           | Long time since pregnancy and based only on recognized clinical pregnancies                   |
| Selection                     | Did selection of study participants result in appropriate comparison groups?                             | -                           | Relatively high differences in participants rates between the exposed group and the referents |
| Attrition/<br>exclusion       | Were outcome data completely reported without attrition or exclusion from analysis?                      | +                           |                                                                                               |
| Selective reporting           | Were all measured outcomes reported?                                                                     | +                           |                                                                                               |
| <b>Vafeiadi et al. (2013)</b> |                                                                                                          | <b>Risk of bias tier: 1</b> |                                                                                               |
| <b>Bias domain</b>            | <b>Question</b>                                                                                          | <b>Score</b>                | <b>Judgement</b>                                                                              |
| Confounding                   | <b>KQA</b> - Did the study design or analysis account for important confounding and modifying variables? | +                           |                                                                                               |
| Detection                     | <b>KQB</b> - Can we be confident in the exposure characterisation?                                       | +                           | CALUX bioassay                                                                                |
| Detection                     | <b>KQC</b> - Can we be confident in the outcome assessment?                                              | +                           |                                                                                               |
| Selection                     | Did selection of study participants result in appropriate comparison groups?                             | +                           |                                                                                               |
| Attrition/<br>exclusion       | Were outcome data completely reported without attrition or                                               | +                           |                                                                                               |

|                               | exclusion from analysis?                                                                                 |                             |                |
|-------------------------------|----------------------------------------------------------------------------------------------------------|-----------------------------|----------------|
| Selective reporting           | Were all measured outcomes reported?                                                                     | ++                          |                |
| <b>Vafeiadi et al. (2014)</b> |                                                                                                          | <b>Risk of bias tier: 1</b> |                |
| Bias domain                   | Question                                                                                                 | Score                       | Judgement      |
| Confounding                   | <b>KQA</b> - Did the study design or analysis account for important confounding and modifying variables? | ++                          |                |
| Detection                     | <b>KQB</b> - Can we be confident in the exposure characterisation?                                       | +                           | CALUX bioassay |
| Detection                     | <b>KQC</b> - Can we be confident in the outcome assessment?                                              | ++                          |                |
| Selection                     | Did selection of study participants result in appropriate comparison groups?                             | +                           |                |
| Attrition/exclusion           | Were outcome data completely reported without attrition or exclusion from analysis?                      | ++                          |                |
| Selective reporting           | Were all measured outcomes reported?                                                                     | ++                          |                |

#### A.9.4. Studies on thyroid disease and thyroid hormones

**Table 79.** Risk of bias appraisal of studies on effects in thyroid disease and thyroid hormones (scores corresponding to one appraisal, except for Baccarelli et al. (2008) where the score is the combined scores of two independent appraisals). Note: appraisal of individual studies focused only on risk of bias; additional quality aspects were considered when evaluating the overall confidence in the body of evidence (see Section 2.2.1.2 of the opinion).

| <b>STUDIES IN ADULTS</b>     |                                                                                                          |                             |                                                                                                                                         |
|------------------------------|----------------------------------------------------------------------------------------------------------|-----------------------------|-----------------------------------------------------------------------------------------------------------------------------------------|
| <b>Calvert et al. (1999)</b> |                                                                                                          | <b>Risk of bias tier: 1</b> |                                                                                                                                         |
| Bias domain                  | Question                                                                                                 | Score                       | Judgement                                                                                                                               |
| Confounding                  | <b>KQA</b> - Did the study design or analysis account for important confounding and modifying variables? | +                           | Adjusted for sex age, race and medication but not other diseases, which is OK.                                                          |
| Detection                    | <b>KQB</b> - Can we be confident in the exposure characterisation?                                       | ++                          | Individual TCDD data, current and back-extrapolated.                                                                                    |
| Detection                    | <b>KQC</b> - Can we be confident in the outcome assessment?                                              | ++                          |                                                                                                                                         |
| Selection                    | Did selection of study participants result in appropriate comparison groups?                             | -                           | Referents from the area but not from the company, so potential "healthy workers selection". Poor participation rate (28%) in referents. |
| Attrition/exclusion          | Were outcome data completely reported without attrition or exclusion from analysis?                      | ++                          |                                                                                                                                         |
| Selective reporting          | Were all measured outcomes reported?                                                                     | ++                          |                                                                                                                                         |
| <b>Johnson et al. (2001)</b> |                                                                                                          | <b>Risk of bias tier: 2</b> |                                                                                                                                         |
| Bias domain                  | Question                                                                                                 | Score                       | Judgement                                                                                                                               |
| Confounding                  | <b>KQA</b> - Did the study design or analysis account for important confounding and modifying variables? | -                           | No confounder adjustment                                                                                                                |
| Detection                    | <b>KQB</b> - Can we be confident in the exposure characterisation?                                       | +                           | Individual TCDD determinations, but 9/32 < DL and extrapolated historical levels somewhat uncertain.                                    |

|                             |                                                                                                          |                             |                                                                                                                                                                            |
|-----------------------------|----------------------------------------------------------------------------------------------------------|-----------------------------|----------------------------------------------------------------------------------------------------------------------------------------------------------------------------|
| Detection                   | <b>KQC</b> - Can we be confident in the outcome assessment?                                              | ++                          |                                                                                                                                                                            |
| Selection                   | Did selection of study participants result in appropriate comparison groups?                             | ++                          | Random sample. Participation rate not described.                                                                                                                           |
| Attrition/exclusion         | Were outcome data completely reported without attrition or exclusion from analysis?                      | ++                          |                                                                                                                                                                            |
| Selective reporting         | Were all measured outcomes reported?                                                                     | ++                          |                                                                                                                                                                            |
| <b>Pavuk et al. (2003)</b>  |                                                                                                          | <b>Risk of bias tier: 1</b> |                                                                                                                                                                            |
| <b>Bias domain</b>          | <b>Question</b>                                                                                          | <b>Score</b>                | <b>Judgement</b>                                                                                                                                                           |
| Confounding                 | <b>KQA</b> - Did the study design or analysis account for important confounding and modifying variables? | +                           | Several but not all relevant potential confounders adjusted for. Smoking was assessed for a subgroup (another publication) indicating minor differences.                   |
| Detection                   | <b>KQB</b> - Can we be confident in the exposure characterisation?                                       | +                           | Individual TCDD data, although only on one occasion about 15 years after exposure. Back-extrapolation.                                                                     |
| Detection                   | <b>KQC</b> - Can we be confident in the outcome assessment?                                              | ++                          |                                                                                                                                                                            |
| Selection                   | Did selection of study participants result in appropriate comparison groups?                             | +                           | Participation based on register of staff. All could be followed up. Internal reference group similar to the exposed group.                                                 |
| Attrition/exclusion         | Were outcome data completely reported without attrition or exclusion from analysis?                      | ++                          |                                                                                                                                                                            |
| Selective reporting         | Were all measured outcomes reported?                                                                     | ++                          |                                                                                                                                                                            |
| <b>Foster et al. (2005)</b> |                                                                                                          | <b>Risk of bias tier: 2</b> |                                                                                                                                                                            |
| <b>Bias domain</b>          | <b>Question</b>                                                                                          | <b>Score</b>                | <b>Judgement</b>                                                                                                                                                           |
| Confounding                 | <b>KQA</b> - Did the study design or analysis account for important confounding and modifying variables? | ++                          | Impact of potential confounders checked and found not to be present.                                                                                                       |
| Detection                   | <b>KQB</b> - Can we be confident in the exposure characterisation?                                       | --                          | Serious doubts about the CALUX bioassay employed. Very low exposure; none of the women had a CALUX-TEQ > 1 pg/g.                                                           |
| Detection                   | <b>KQC</b> - Can we be confident in the outcome assessment?                                              | ++                          |                                                                                                                                                                            |
| Selection                   | Did selection of study participants result in appropriate comparison groups?                             | ++                          | Selection clearly described, and participation rate OK in those fulfilling inclusion criteria.                                                                             |
| Attrition/exclusion         | Were outcome data completely reported without attrition or exclusion from analysis?                      | ++                          |                                                                                                                                                                            |
| Selective reporting         | Were all measured outcomes reported?                                                                     | ++                          |                                                                                                                                                                            |
| <b>Bloom et al. (2006)</b>  |                                                                                                          | <b>Risk of bias tier: 2</b> |                                                                                                                                                                            |
| <b>Bias domain</b>          | <b>Question</b>                                                                                          | <b>Score</b>                | <b>Judgement</b>                                                                                                                                                           |
| Confounding                 | <b>KQA</b> - Did the study design or analysis account for important confounding and modifying variables? | -                           | Adjustment for PCB, but no difference if unadjusted. No adjustment for other confounders. Age may be a confounder. Non-consumers (N=15) may be different in other aspects. |
| Detection                   | <b>KQB</b> - Can we be confident in the exposure characterisation?                                       | +                           | A number of samples <LOD.                                                                                                                                                  |
| Detection                   | <b>KQC</b> - Can we be confident in the outcome assessment?                                              | +                           | T4 and T3 unreliable due to long term storage.                                                                                                                             |
| Selection                   | Did selection of study participants result in appropriate comparison groups?                             | +                           | Selection of anglers with high PCB is OK. Participation rate not described.                                                                                                |

|                                        |                                                                                                          |                             |                                                                                                                                                                                                                                                                                                        |
|----------------------------------------|----------------------------------------------------------------------------------------------------------|-----------------------------|--------------------------------------------------------------------------------------------------------------------------------------------------------------------------------------------------------------------------------------------------------------------------------------------------------|
| Attrition/<br>exclusion                | Were outcome data completely reported without attrition or exclusion from analysis?                      | +                           | One outlier excluded.                                                                                                                                                                                                                                                                                  |
| Selective reporting                    | Were all measured outcomes reported?                                                                     | ++                          |                                                                                                                                                                                                                                                                                                        |
| <b>Turyk et al. (2006)</b>             |                                                                                                          | <b>Risk of bias tier: 1</b> |                                                                                                                                                                                                                                                                                                        |
| <b>Bias domain</b>                     | <b>Question</b>                                                                                          | <b>Score</b>                | <b>Judgement</b>                                                                                                                                                                                                                                                                                       |
| Confounding                            | <b>KQA</b> - Did the study design or analysis account for important confounding and modifying variables? | ++                          | BMI, smoking age and medication uses seems appropriate.                                                                                                                                                                                                                                                |
| Detection                              | <b>KQB</b> - Can we be confident in the exposure characterisation?                                       | +                           |                                                                                                                                                                                                                                                                                                        |
| Detection                              | <b>KQC</b> - Can we be confident in the outcome assessment?                                              | ++                          |                                                                                                                                                                                                                                                                                                        |
| Selection                              | Did selection of study participants result in appropriate comparison groups?                             | +                           | Only limited number of characteristics were presented.                                                                                                                                                                                                                                                 |
| Attrition/<br>exclusion                | Were outcome data completely reported without attrition or exclusion from analysis?                      | +                           | The small size if of major concern as and 1 out of 10 outcomes is significant (total TEQ vs TSH with p=0.04) a chance finding cannot be excluded (has to be interpreted in the context of findings from other studies, which may be supportive). Would not survive adjustment for multiple comparisons |
| Selective reporting                    | Were all measured outcomes reported?                                                                     | ++                          |                                                                                                                                                                                                                                                                                                        |
| <b>Chevrier et al. (2014)</b>          |                                                                                                          | <b>Risk of bias tier: 1</b> |                                                                                                                                                                                                                                                                                                        |
| <b>Bias domain</b>                     | <b>Question</b>                                                                                          | <b>Score</b>                | <b>Judgement</b>                                                                                                                                                                                                                                                                                       |
| Confounding                            | <b>KQA</b> - Did the study design or analysis account for important confounding and modifying variables? | +                           | Good confounder control, and rational selection of which to include.                                                                                                                                                                                                                                   |
| Detection                              | <b>KQB</b> - Can we be confident in the exposure characterisation?                                       | ++                          | Individual TCDD data.                                                                                                                                                                                                                                                                                  |
| Detection                              | <b>KQC</b> - Can we be confident in the outcome assessment?                                              | ++                          |                                                                                                                                                                                                                                                                                                        |
| Selection                              | Did selection of study participants result in appropriate comparison groups?                             | ++                          | Participation based on residence. Relatively high participation rate and analyses only performed within the group.                                                                                                                                                                                     |
| Attrition/<br>exclusion                | Were outcome data completely reported without attrition or exclusion from analysis?                      | ++                          | Few exclusions, and sensitivity analyses performed.                                                                                                                                                                                                                                                    |
| Selective reporting                    | Were all measured outcomes reported?                                                                     | ++                          |                                                                                                                                                                                                                                                                                                        |
| <b>STUDIES IN NEWBORNS OR CHILDREN</b> |                                                                                                          |                             |                                                                                                                                                                                                                                                                                                        |
| <b>Nagayama et al. (1998)</b>          |                                                                                                          | <b>Risk of bias tier: 2</b> |                                                                                                                                                                                                                                                                                                        |
| <b>Bias domain</b>                     | <b>Question</b>                                                                                          | <b>Score</b>                | <b>Judgement</b>                                                                                                                                                                                                                                                                                       |
| Confounding                            | <b>KQA</b> - Did the study design or analysis account for important confounding and modifying variables? | -                           | No confounder adjustment. Total intake should be associated with age and weight of children, and grade of breast-feeding. No information on associations with dioxin levels.                                                                                                                           |
| Detection                              | <b>KQB</b> - Can we be confident in the exposure characterisation?                                       | +                           | Individual intake estimates.                                                                                                                                                                                                                                                                           |
| Detection                              | <b>KQC</b> - Can we be confident in the outcome assessment?                                              | ++                          |                                                                                                                                                                                                                                                                                                        |
| Selection                              | Did selection of study participants result in appropriate comparison groups?                             | +                           | Convenience sample. Participation rate not described.                                                                                                                                                                                                                                                  |
| Attrition/<br>exclusion                | Were outcome data completely                                                                             | ++                          |                                                                                                                                                                                                                                                                                                        |

|                               |                                                                                                          |                             |                                                                                                                                                   |
|-------------------------------|----------------------------------------------------------------------------------------------------------|-----------------------------|---------------------------------------------------------------------------------------------------------------------------------------------------|
| exclusion                     | reported without attrition or exclusion from analysis?                                                   |                             |                                                                                                                                                   |
| Selective reporting           | Were all measured outcomes reported?                                                                     | ++                          |                                                                                                                                                   |
| <b>Matsuura et al. (2001)</b> |                                                                                                          | <b>Risk of bias tier: 2</b> |                                                                                                                                                   |
| <b>Bias domain</b>            | <b>Question</b>                                                                                          | <b>Score</b>                | <b>Judgement</b>                                                                                                                                  |
| Confounding                   | <b>KQA</b> - Did the study design or analysis account for important confounding and modifying variables? | -                           | Analyses seem to be unadjusted for age and other potential confounders.                                                                           |
| Detection                     | <b>KQB</b> - Can we be confident in the exposure characterisation?                                       | ++                          | Individual breast milk TEQs.                                                                                                                      |
| Detection                     | <b>KQC</b> - Can we be confident in the outcome assessment?                                              | ++                          |                                                                                                                                                   |
| Selection                     | Did selection of study participants result in appropriate comparison groups?                             | +                           | Selection and participation rate not described, but it was a nationwide study.                                                                    |
| Attrition/exclusion           | Were outcome data completely reported without attrition or exclusion from analysis?                      | ++                          |                                                                                                                                                   |
| Selective reporting           | Were all measured outcomes reported?                                                                     | ++                          |                                                                                                                                                   |
| <b>Nagayama et al. (2001)</b> |                                                                                                          | <b>Risk of bias tier: 2</b> |                                                                                                                                                   |
| <b>Bias domain</b>            | <b>Question</b>                                                                                          | <b>Score</b>                | <b>Judgement</b>                                                                                                                                  |
| Confounding                   | <b>KQA</b> - Did the study design or analysis account for important confounding and modifying variables? | -                           | No adjustment for age or sex (which are associated with thyroid hormones), but TCDD TEQs were not associated with sex, however possibly with age. |
| Detection                     | <b>KQB</b> - Can we be confident in the exposure characterisation?                                       | ++                          | Individual TCDD data.                                                                                                                             |
| Detection                     | <b>KQC</b> - Can we be confident in the outcome assessment?                                              | ++                          |                                                                                                                                                   |
| Selection                     | Did selection of study participants result in appropriate comparison groups?                             | --                          | No relevant comparison group. 16 patients out of 83 patients examined 2 years earlier participated "voluntarily".                                 |
| Attrition/exclusion           | Were outcome data completely reported without attrition or exclusion from analysis?                      | ++                          |                                                                                                                                                   |
| Selective reporting           | Were all measured outcomes reported?                                                                     | ++                          |                                                                                                                                                   |
| <b>Wang et al. (2005)</b>     |                                                                                                          | <b>Risk of bias tier: 2</b> |                                                                                                                                                   |
| <b>Bias domain</b>            | <b>Question</b>                                                                                          | <b>Score</b>                | <b>Judgement</b>                                                                                                                                  |
| Confounding                   | <b>KQA</b> - Did the study design or analysis account for important confounding and modifying variables? | -                           | Most analyses seem to be unadjusted for age and other potential confounders.                                                                      |
| Detection                     | <b>KQB</b> - Can we be confident in the exposure characterisation?                                       | ++                          | Individual TCDD data.                                                                                                                             |
| Detection                     | <b>KQC</b> - Can we be confident in the outcome assessment?                                              | ++                          |                                                                                                                                                   |
| Selection                     | Did selection of study participants result in appropriate comparison groups?                             | +                           | Participation rate not described.                                                                                                                 |
| Attrition/exclusion           | Were outcome data completely reported without attrition or exclusion from analysis?                      | ++                          |                                                                                                                                                   |
| Selective reporting           | Were all measured outcomes reported?                                                                     | ++                          |                                                                                                                                                   |
| <b>Marvoet et al. (2007)</b>  |                                                                                                          | <b>Risk of bias tier: 1</b> |                                                                                                                                                   |
| <b>Bias domain</b>            | <b>Question</b>                                                                                          | <b>Score</b>                | <b>Judgement</b>                                                                                                                                  |
| Confounding                   | <b>KQA</b> - Did the study design or                                                                     | ++                          | Several potential confounders were                                                                                                                |

|                                 |                                                                                                          |                             |                                                                                                                                                                                                                                                                                           |
|---------------------------------|----------------------------------------------------------------------------------------------------------|-----------------------------|-------------------------------------------------------------------------------------------------------------------------------------------------------------------------------------------------------------------------------------------------------------------------------------------|
|                                 | analysis account for important confounding and modifying variables?                                      |                             | adjusted for.                                                                                                                                                                                                                                                                             |
| Detection                       | <b>KQB</b> - Can we be confident in the exposure characterisation?                                       | ++                          | Individual breast milk and blood TEQs.                                                                                                                                                                                                                                                    |
| Detection                       | <b>KQC</b> - Can we be confident in the outcome assessment?                                              | ++                          |                                                                                                                                                                                                                                                                                           |
| Selection                       | Did selection of study participants result in appropriate comparison groups?                             | +                           | Convenience sample. Participation rate not described.                                                                                                                                                                                                                                     |
| Attrition/exclusion             | Were outcome data completely reported without attrition or exclusion from analysis?                      | ++                          |                                                                                                                                                                                                                                                                                           |
| Selective reporting             | Were all measured outcomes reported?                                                                     | ++                          |                                                                                                                                                                                                                                                                                           |
| <b>Nagayama et al. (2007a)</b>  |                                                                                                          | <b>Risk of bias tier: 1</b> |                                                                                                                                                                                                                                                                                           |
| <b>Bias domain</b>              | <b>Question</b>                                                                                          | <b>Score</b>                | <b>Judgement</b>                                                                                                                                                                                                                                                                          |
| Confounding                     | <b>KQA</b> - Did the study design or analysis account for important confounding and modifying variables? | +                           | Only age and parity, adjustment for maternal BMI, and lipids in milk would have been appropriate. If there is a heritable component to cretinism that could be a source of confounding.                                                                                                   |
| Detection                       | <b>KQB</b> - Can we be confident in the exposure characterisation?                                       | +                           | Presenting lipid adjusted results would have been informative. Blood collected prior to or during pregnancy would have been more optimal in terms of excluding reverse causation. However breast milk samples have been shown to be highly correlated with maternal samples in pregnancy. |
| Detection                       | <b>KQC</b> - Can we be confident in the outcome assessment?                                              | ++                          |                                                                                                                                                                                                                                                                                           |
| Selection                       | Did selection of study participants result in appropriate comparison groups?                             | ++                          |                                                                                                                                                                                                                                                                                           |
| Attrition/exclusion             | Were outcome data completely reported without attrition or exclusion from analysis?                      | ++                          |                                                                                                                                                                                                                                                                                           |
| Selective reporting             | Were all measured outcomes reported?                                                                     | ++                          |                                                                                                                                                                                                                                                                                           |
| <b>Wilhelm et al. (2008)</b>    |                                                                                                          | <b>Risk of bias tier: 1</b> |                                                                                                                                                                                                                                                                                           |
| <b>Bias domain</b>              | <b>Question</b>                                                                                          | <b>Score</b>                | <b>Judgement</b>                                                                                                                                                                                                                                                                          |
| Confounding                     | <b>KQA</b> - Did the study design or analysis account for important confounding and modifying variables? | ++                          | Good description of, and adjustment for, potential confounders.                                                                                                                                                                                                                           |
| Detection                       | <b>KQB</b> - Can we be confident in the exposure characterisation?                                       | ++                          | Individual breast milk and blood TEQs.                                                                                                                                                                                                                                                    |
| Detection                       | <b>KQC</b> - Can we be confident in the outcome assessment?                                              | ++                          |                                                                                                                                                                                                                                                                                           |
| Selection                       | Did selection of study participants result in appropriate comparison groups?                             | +                           | Convenience sample. Participation rate not described.                                                                                                                                                                                                                                     |
| Attrition/exclusion             | Were outcome data completely reported without attrition or exclusion from analysis?                      | ++                          |                                                                                                                                                                                                                                                                                           |
| Selective reporting             | Were all measured outcomes reported?                                                                     | ++                          |                                                                                                                                                                                                                                                                                           |
| <b>Baccarelli et al. (2008)</b> |                                                                                                          | <b>Risk of bias tier: 1</b> |                                                                                                                                                                                                                                                                                           |
| <b>Bias domain</b>              | <b>Question</b>                                                                                          | <b>Score</b>                | <b>Judgement</b>                                                                                                                                                                                                                                                                          |
| Confounding                     | <b>KQA</b> - Did the study design or analysis account for important                                      | +                           | Analyses adjusted for most confounders. Data not available on iodine, but such                                                                                                                                                                                                            |



|                            |                                                                                                          |                             |                                                                                                                                                                                                                                                                                                                                                                          |
|----------------------------|----------------------------------------------------------------------------------------------------------|-----------------------------|--------------------------------------------------------------------------------------------------------------------------------------------------------------------------------------------------------------------------------------------------------------------------------------------------------------------------------------------------------------------------|
|                            | confounding and modifying variables?                                                                     |                             | confounding unlikely.<br>Information about timing of blood sample collection relative to the outcome assessment is missing.                                                                                                                                                                                                                                              |
| Detection                  | <b>KQB</b> - Can we be confident in the exposure characterisation?                                       | +                           | Individual data only for subgroup, so possible non-differential misclassification. They back their group level findings with dioxin measures in blood but a drawback is 1) small sample size and 2) samples are drawn at different time point in pregnancy. However the results from the two studies (group level exposure and measured exposure) more or less converge. |
| Detection                  | <b>KQC</b> - Can we be confident in the outcome assessment?                                              | +                           | Timing is not available for those with high TCDD and TSH.                                                                                                                                                                                                                                                                                                                |
| Selection                  | Did selection of study participants result in appropriate comparison groups?                             | +                           | Participation based on residence. Good tracing of children.<br>The groups are similar in relation to the few background variables compared. Lack of information on some lifestyle characteristics.                                                                                                                                                                       |
| Attrition/exclusion        | Were outcome data completely reported without attrition or exclusion from analysis?                      | +                           | There is little information available to evaluate attrition bias here.                                                                                                                                                                                                                                                                                                   |
| Selective reporting        | Were all measured outcomes reported?                                                                     | +                           |                                                                                                                                                                                                                                                                                                                                                                          |
| <b>Han et al. (2011)</b>   |                                                                                                          | <b>Risk of bias tier: 2</b> |                                                                                                                                                                                                                                                                                                                                                                          |
| <b>Bias domain</b>         | <b>Question</b>                                                                                          | <b>Score</b>                | <b>Judgement</b>                                                                                                                                                                                                                                                                                                                                                         |
| Confounding                | <b>KQA</b> - Did the study design or analysis account for important confounding and modifying variables? | --                          | Probably no adjustment for lifestyle factors. Other chemical exposures.                                                                                                                                                                                                                                                                                                  |
| Detection                  | <b>KQB</b> - Can we be confident in the exposure characterisation?                                       | +                           | Some pooled samples. Unclear numbers.                                                                                                                                                                                                                                                                                                                                    |
| Detection                  | <b>KQC</b> - Can we be confident in the outcome assessment?                                              | ++                          |                                                                                                                                                                                                                                                                                                                                                                          |
| Selection                  | Did selection of study participants result in appropriate comparison groups?                             | -                           | Recruitment and participation rate not described.                                                                                                                                                                                                                                                                                                                        |
| Attrition/exclusion        | Were outcome data completely reported without attrition or exclusion from analysis?                      | +                           | Not clearly described.                                                                                                                                                                                                                                                                                                                                                   |
| Selective reporting        | Were all measured outcomes reported?                                                                     | +                           | Difficult to judge. Insufficient information.                                                                                                                                                                                                                                                                                                                            |
| <b>Leijs et al. (2012)</b> |                                                                                                          | <b>Risk of bias tier: 2</b> |                                                                                                                                                                                                                                                                                                                                                                          |
| <b>Bias domain</b>         | <b>Question</b>                                                                                          | <b>Score</b>                | <b>Judgement</b>                                                                                                                                                                                                                                                                                                                                                         |
| Confounding                | <b>KQA</b> - Did the study design or analysis account for important confounding and modifying variables? | -                           | No confounder adjustment                                                                                                                                                                                                                                                                                                                                                 |
| Detection                  | <b>KQB</b> - Can we be confident in the exposure characterisation?                                       | +                           | Individual intake estimates.                                                                                                                                                                                                                                                                                                                                             |
| Detection                  | <b>KQC</b> - Can we be confident in the outcome assessment?                                              | ++                          |                                                                                                                                                                                                                                                                                                                                                                          |
| Selection                  | Did selection of study participants result in appropriate comparison groups?                             | +                           | Convenience sample. Participation rate not described                                                                                                                                                                                                                                                                                                                     |
| Attrition/exclusion        | Were outcome data completely reported without attrition or exclusion from analysis?                      | ++                          |                                                                                                                                                                                                                                                                                                                                                                          |
| Selective reporting        | Were all measured outcomes reported?                                                                     | ++                          |                                                                                                                                                                                                                                                                                                                                                                          |

| <b>Croes et al. (2014)</b> |                                                                                                          | <b>Risk of bias tier: 2</b> |                                                                                                                                          |
|----------------------------|----------------------------------------------------------------------------------------------------------|-----------------------------|------------------------------------------------------------------------------------------------------------------------------------------|
| <b>Bias domain</b>         | <b>Question</b>                                                                                          | <b>Score</b>                | <b>Judgement</b>                                                                                                                         |
| Confounding                | <b>KQA</b> - Did the study design or analysis account for important confounding and modifying variables? | -                           | Adjustment for some potential confounders on individual level but not for area.                                                          |
| Detection                  | <b>KQB</b> - Can we be confident in the exposure characterisation?                                       | ++                          |                                                                                                                                          |
| Detection                  | <b>KQC</b> - Can we be confident in the outcome assessment?                                              | ++                          |                                                                                                                                          |
| Selection                  | Did selection of study participants result in appropriate comparison groups?                             | +                           | Random approach. Low participation rate, but this is not likely to have introduced selection bias.                                       |
| Attrition/exclusion        | Were outcome data completely reported without attrition or exclusion from analysis?                      | ++                          |                                                                                                                                          |
| Selective reporting        | Were all measured outcomes reported?                                                                     | ++                          |                                                                                                                                          |
| <b>Xu et al. (2014)</b>    |                                                                                                          | <b>Risk of bias tier: 1</b> |                                                                                                                                          |
| <b>Bias domain</b>         | <b>Question</b>                                                                                          | <b>Score</b>                | <b>Judgement</b>                                                                                                                         |
| Confounding                | <b>KQA</b> - Did the study design or analysis account for important confounding and modifying variables? | +                           | No confounder adjustment but all children were 8 years old and sex ratio was the same in the two groups.                                 |
| Detection                  | <b>KQB</b> - Can we be confident in the exposure characterisation?                                       | ++                          |                                                                                                                                          |
| Detection                  | <b>KQC</b> - Can we be confident in the outcome assessment?                                              | ++                          |                                                                                                                                          |
| Selection                  | Did selection of study participants result in appropriate comparison groups?                             | -                           | Selection procedure not described.                                                                                                       |
| Attrition/exclusion        | Were outcome data completely reported without attrition or exclusion from analysis?                      | ++                          |                                                                                                                                          |
| Selective reporting        | Were all measured outcomes reported?                                                                     | ++                          |                                                                                                                                          |
| <b>Su et al. (2015)</b>    |                                                                                                          | <b>Risk of bias tier: 2</b> |                                                                                                                                          |
| <b>Bias domain</b>         | <b>Question</b>                                                                                          | <b>Score</b>                | <b>Judgement</b>                                                                                                                         |
| Confounding                | <b>KQA</b> - Did the study design or analysis account for important confounding and modifying variables? | -                           | No adjustment were made when comparing mean levels for each outcome across categories of increasing dioxin exposure                      |
| Detection                  | <b>KQB</b> - Can we be confident in the exposure characterisation?                                       | ++                          |                                                                                                                                          |
| Detection                  | <b>KQC</b> - Can we be confident in the outcome assessment?                                              | ++                          |                                                                                                                                          |
| Selection                  | Did selection of study participants result in appropriate comparison groups?                             | +                           | Appears to be the case difficult to evaluate as no comparison is made to other children whose maternal dioxin levels were not quantified |
| Attrition/exclusion        | Were outcome data completely reported without attrition or exclusion from analysis?                      | +                           |                                                                                                                                          |
| Selective reporting        | Were all measured outcomes reported?                                                                     | ++                          |                                                                                                                                          |



### A.9.5. Studies on diabetes and obesity

**Table 80.** Risk of bias appraisal of studies on effects in type 2 diabetes and obesity (scores corresponding to one appraisal). Note: appraisal of individual studies focused only on risk of bias; additional quality aspects were considered when evaluating the overall confidence in the body of evidence (see Section 2.2.1.2 of the opinion).

| <b>Michalek et al. (1999a)</b> |                                                                                                          | <b>Risk of bias tier: 2</b> |                                                                                                                                                 |
|--------------------------------|----------------------------------------------------------------------------------------------------------|-----------------------------|-------------------------------------------------------------------------------------------------------------------------------------------------|
| <b>Bias domain</b>             | <b>Question</b>                                                                                          | <b>Score</b>                | <b>Judgement</b>                                                                                                                                |
| Confounding                    | <b>KQA</b> - Did the study design or analysis account for important confounding and modifying variables? | ++                          |                                                                                                                                                 |
| Detection                      | <b>KQB</b> - Can we be confident in the exposure characterisation?                                       | -                           | Measured many years after the War ended, assuming a constant half-life.                                                                         |
| Detection                      | <b>KQC</b> - Can we be confident in the outcome assessment?                                              | ++                          |                                                                                                                                                 |
| Selection                      | Did selection of study participants result in appropriate comparison groups?                             | +                           |                                                                                                                                                 |
| Attrition/exclusion            | Were outcome data completely reported without attrition or exclusion from analysis?                      | ++                          |                                                                                                                                                 |
| Selective reporting            | Were all measured outcomes reported?                                                                     | ++                          |                                                                                                                                                 |
| <b>Steenland et al. (1999)</b> |                                                                                                          | <b>Risk of bias tier: 2</b> |                                                                                                                                                 |
| <b>Bias domain</b>             | <b>Question</b>                                                                                          | <b>Score</b>                | <b>Judgement</b>                                                                                                                                |
| Confounding                    | <b>KQA</b> - Did the study design or analysis account for important confounding and modifying variables? | -                           | Lack of information on, e.g. smoking.                                                                                                           |
| Detection                      | <b>KQB</b> - Can we be confident in the exposure characterisation?                                       | -                           | Based on job-exposure matrix.                                                                                                                   |
| Detection                      | <b>KQC</b> - Can we be confident in the outcome assessment?                                              | -                           | Death certificate data may be inadequate to study diabetes.                                                                                     |
| Selection                      | Did selection of study participants result in appropriate comparison groups?                             | +                           |                                                                                                                                                 |
| Attrition/exclusion            | Were outcome data completely reported without attrition or exclusion from analysis?                      | +                           |                                                                                                                                                 |
| Selective reporting            | Were all measured outcomes reported?                                                                     | ++                          |                                                                                                                                                 |
| <b>Cranmer et al. (2000)</b>   |                                                                                                          | <b>Risk of bias tier: 2</b> |                                                                                                                                                 |
| <b>Bias domain</b>             | <b>Question</b>                                                                                          | <b>Score</b>                | <b>Judgement</b>                                                                                                                                |
| Confounding                    | <b>KQA</b> - Did the study design or analysis account for important confounding and modifying variables? | -                           | Although information is obtained about potential confounders it is not possible to adjust when there are so few subjects in the highest decile. |
| Detection                      | <b>KQB</b> - Can we be confident in the exposure characterisation?                                       | ++                          |                                                                                                                                                 |
| Detection                      | <b>KQC</b> - Can we be confident in the outcome assessment?                                              | ++                          |                                                                                                                                                 |
| Selection                      | Did selection of study participants result in appropriate comparison groups?                             | +                           |                                                                                                                                                 |
| Attrition/exclusion            | Were outcome data completely reported without attrition or exclusion from analysis?                      | ++                          |                                                                                                                                                 |
| Selective reporting            | Were all measured outcomes reported?                                                                     | ++                          |                                                                                                                                                 |

| <b>Longnecker and Michalek (2000)</b> |                                                                                                          | <b>Risk of bias tier: 1</b> |                                                                                                                                                                        |
|---------------------------------------|----------------------------------------------------------------------------------------------------------|-----------------------------|------------------------------------------------------------------------------------------------------------------------------------------------------------------------|
| <b>Bias domain</b>                    | <b>Question</b>                                                                                          | <b>Score</b>                | <b>Judgement</b>                                                                                                                                                       |
| Confounding                           | <b>KQA</b> - Did the study design or analysis account for important confounding and modifying variables? | ++                          |                                                                                                                                                                        |
| Detection                             | <b>KQB</b> - Can we be confident in the exposure characterisation?                                       | +                           |                                                                                                                                                                        |
| Detection                             | <b>KQC</b> - Can we be confident in the outcome assessment?                                              | ++                          |                                                                                                                                                                        |
| Selection                             | Did selection of study participants result in appropriate comparison groups?                             | ++                          |                                                                                                                                                                        |
| Attrition/exclusion                   | Were outcome data completely reported without attrition or exclusion from analysis?                      | ++                          |                                                                                                                                                                        |
| Selective reporting                   | Were all measured outcomes reported?                                                                     | ++                          |                                                                                                                                                                        |
| <b>Steenland et al. (2001a)</b>       |                                                                                                          | <b>Risk of bias tier: 1</b> |                                                                                                                                                                        |
| <b>Bias domain</b>                    | <b>Question</b>                                                                                          | <b>Score</b>                | <b>Judgement</b>                                                                                                                                                       |
| Confounding                           | <b>KQA</b> - Did the study design or analysis account for important confounding and modifying variables? | ++                          |                                                                                                                                                                        |
| Detection                             | <b>KQB</b> - Can we be confident in the exposure characterisation?                                       | +                           | Same laboratory and same method in the studies.                                                                                                                        |
| Detection                             | <b>KQC</b> - Can we be confident in the outcome assessment?                                              | +                           | Different methods in the two studies.                                                                                                                                  |
| Selection                             | Did selection of study participants result in appropriate comparison groups?                             | +                           | Good participation in Ranch Hand, lower in NIOSH. Subsequent telephone interviews with non-participants did not suggest that systematic selection bias were operating. |
| Attrition/exclusion                   | Were outcome data completely reported without attrition or exclusion from analysis?                      | ++                          |                                                                                                                                                                        |
| Selective reporting                   | Were all measured outcomes reported?                                                                     | ++                          |                                                                                                                                                                        |
| <b>Johnson et al. (2001)</b>          |                                                                                                          | <b>Risk of bias tier: 2</b> |                                                                                                                                                                        |
| <b>Bias domain</b>                    | <b>Question</b>                                                                                          | <b>Score</b>                | <b>Judgement</b>                                                                                                                                                       |
| Confounding                           | <b>KQA</b> - Did the study design or analysis account for important confounding and modifying variables? | -                           | Small study, not possible to take potential confounders into account                                                                                                   |
| Detection                             | <b>KQB</b> - Can we be confident in the exposure characterisation?                                       | +                           |                                                                                                                                                                        |
| Detection                             | <b>KQC</b> - Can we be confident in the outcome assessment?                                              | ++                          |                                                                                                                                                                        |
| Selection                             | Did selection of study participants result in appropriate comparison groups?                             | +                           |                                                                                                                                                                        |
| Attrition/exclusion                   | Were outcome data completely reported without attrition or exclusion from analysis?                      | ++                          |                                                                                                                                                                        |
| Selective reporting                   | Were all measured outcomes reported?                                                                     | ++                          |                                                                                                                                                                        |
| <b>Fierens et al. (2003)</b>          |                                                                                                          | <b>Risk of bias tier: 2</b> |                                                                                                                                                                        |
| <b>Bias domain</b>                    | <b>Question</b>                                                                                          | <b>Score</b>                | <b>Judgement</b>                                                                                                                                                       |
| Confounding                           | <b>KQA</b> - Did the study design or analysis account for important confounding and modifying variables? | -                           | Too few participants/cases to make reasonable adjustments for potential confounders                                                                                    |
| Detection                             | <b>KQB</b> - Can we be confident in the                                                                  | +                           |                                                                                                                                                                        |

|                                  |                                                                                                          |                             |                                                                                                         |
|----------------------------------|----------------------------------------------------------------------------------------------------------|-----------------------------|---------------------------------------------------------------------------------------------------------|
| Detection                        | exposure characterisation?<br><b>KQC</b> - Can we be confident in the outcome assessment?                | +                           |                                                                                                         |
| Selection                        | Did selection of study participants result in appropriate comparison groups?                             | -                           | Recruited on a volunteer basis.                                                                         |
| Attrition/<br>exclusion          | Were outcome data completely reported without attrition or exclusion from analysis?                      | +                           |                                                                                                         |
| Selective reporting              | Were all measured outcomes reported?                                                                     | +                           |                                                                                                         |
| <b>Kern et al. (2004)</b>        |                                                                                                          | <b>Risk of bias tier: 1</b> |                                                                                                         |
| <b>Bias domain</b>               | <b>Question</b>                                                                                          | <b>Score</b>                | <b>Judgement</b>                                                                                        |
| Confounding                      | <b>KQA</b> - Did the study design or analysis account for important confounding and modifying variables? | +                           | The only confounding variables that were taken into account were the matching variables.                |
| Detection                        | <b>KQB</b> - Can we be confident in the exposure characterisation?                                       | ++                          |                                                                                                         |
| Detection                        | <b>KQC</b> - Can we be confident in the outcome assessment?                                              | +                           |                                                                                                         |
| Selection                        | Did selection of study participants result in appropriate comparison groups?                             | +                           |                                                                                                         |
| Attrition/<br>exclusion          | Were outcome data completely reported without attrition or exclusion from analysis?                      | ++                          |                                                                                                         |
| Selective reporting              | Were all measured outcomes reported?                                                                     | ++                          |                                                                                                         |
| <b>Baccarelli et al. (2005)</b>  |                                                                                                          | <b>Risk of bias tier: 2</b> |                                                                                                         |
| <b>Bias domain</b>               | <b>Question</b>                                                                                          | <b>Score</b>                | <b>Judgement</b>                                                                                        |
| Confounding                      | <b>KQA</b> - Did the study design or analysis account for important confounding and modifying variables? | -                           | The study did only adjust for age and sex (and zone).                                                   |
| Detection                        | <b>KQB</b> - Can we be confident in the exposure characterisation?                                       | +                           |                                                                                                         |
| Detection                        | <b>KQC</b> - Can we be confident in the outcome assessment?                                              | +                           |                                                                                                         |
| Selection                        | Did selection of study participants result in appropriate comparison groups?                             | +                           |                                                                                                         |
| Attrition/<br>exclusion          | Were outcome data completely reported without attrition or exclusion from analysis?                      | +                           |                                                                                                         |
| Selective reporting              | Were all measured outcomes reported?                                                                     | +                           |                                                                                                         |
| <b>Michalek and Pavuk (2008)</b> |                                                                                                          | <b>Risk of bias tier: 2</b> |                                                                                                         |
| <b>Bias domain</b>               | <b>Question</b>                                                                                          | <b>Score</b>                | <b>Judgement</b>                                                                                        |
| Confounding                      | <b>KQA</b> - Did the study design or analysis account for important confounding and modifying variables? | +                           |                                                                                                         |
| Detection                        | <b>KQB</b> - Can we be confident in the exposure characterisation?                                       | -                           | The exposure was based on a combination of different sources and assumptions, which makes it uncertain. |
| Detection                        | <b>KQC</b> - Can we be confident in the outcome assessment?                                              | +                           |                                                                                                         |
| Selection                        | Did selection of study participants result in appropriate comparison groups?                             | +                           |                                                                                                         |
| Attrition/<br>exclusion          | Were outcome data completely                                                                             | +                           |                                                                                                         |

|                               |                                                                                                          |                             |                                                                                                                                                |
|-------------------------------|----------------------------------------------------------------------------------------------------------|-----------------------------|------------------------------------------------------------------------------------------------------------------------------------------------|
| exclusion                     | reported without attrition or exclusion from analysis?                                                   |                             |                                                                                                                                                |
| Selective reporting           | Were all measured outcomes reported?                                                                     | +                           |                                                                                                                                                |
| <b>Chen et al. (2008)</b>     |                                                                                                          | <b>Risk of bias tier: 2</b> |                                                                                                                                                |
| <b>Bias domain</b>            | <b>Question</b>                                                                                          | <b>Score</b>                | <b>Judgement</b>                                                                                                                               |
| Confounding                   | <b>KQA</b> - Did the study design or analysis account for important confounding and modifying variables? | -                           | Other exposures (pesticides)?. Small study hard to adjust for confounders.                                                                     |
| Detection                     | <b>KQB</b> - Can we be confident in the exposure characterisation?                                       | ++                          |                                                                                                                                                |
| Detection                     | <b>KQC</b> - Can we be confident in the outcome assessment?                                              | +                           |                                                                                                                                                |
| Selection                     | Did selection of study participants result in appropriate comparison groups?                             | +                           | 80% of all ongoing pregnancies.                                                                                                                |
| Attrition/exclusion           | Were outcome data completely reported without attrition or exclusion from analysis?                      | ++                          |                                                                                                                                                |
| Selective reporting           | Were all measured outcomes reported?                                                                     | ++                          |                                                                                                                                                |
| <b>Uemura et al. (2008)</b>   |                                                                                                          | <b>Risk of bias tier: 1</b> |                                                                                                                                                |
| <b>Bias domain</b>            | <b>Question</b>                                                                                          | <b>Score</b>                | <b>Judgement</b>                                                                                                                               |
| Confounding                   | <b>KQA</b> - Did the study design or analysis account for important confounding and modifying variables? | +                           |                                                                                                                                                |
| Detection                     | <b>KQB</b> - Can we be confident in the exposure characterisation?                                       | +                           |                                                                                                                                                |
| Detection                     | <b>KQC</b> - Can we be confident in the outcome assessment?                                              | +                           |                                                                                                                                                |
| Selection                     | Did selection of study participants result in appropriate comparison groups?                             | -                           | The recruitment was performed via an open call for participants which makes it unclear who actually participate.                               |
| Attrition/exclusion           | Were outcome data completely reported without attrition or exclusion from analysis?                      | ++                          |                                                                                                                                                |
| Selective reporting           | Were all measured outcomes reported?                                                                     | ++                          |                                                                                                                                                |
| <b>Uemura et al. (2009)</b>   |                                                                                                          | <b>Risk of bias tier: 2</b> |                                                                                                                                                |
| <b>Bias domain</b>            | <b>Question</b>                                                                                          | <b>Score</b>                | <b>Judgement</b>                                                                                                                               |
| Confounding                   | <b>KQA</b> - Did the study design or analysis account for important confounding and modifying variables? | +                           |                                                                                                                                                |
| Detection                     | <b>KQB</b> - Can we be confident in the exposure characterisation?                                       | +                           | Doubtful whether the study focus on the sensitive exposure window.                                                                             |
| Detection                     | <b>KQC</b> - Can we be confident in the outcome assessment?                                              | -                           | BMI, one of criteria for the outcomes, may not rigorously reflect central obesity. In addition, the study lacks data on fasting serum glucose. |
| Selection                     | Did selection of study participants result in appropriate comparison groups?                             | -                           | Open call                                                                                                                                      |
| Attrition/exclusion           | Were outcome data completely reported without attrition or exclusion from analysis?                      | ++                          |                                                                                                                                                |
| Selective reporting           | Were all measured outcomes reported?                                                                     | ++                          |                                                                                                                                                |
| <b>Pelclova et al. (2009)</b> |                                                                                                          | <b>Risk of bias tier: 2</b> |                                                                                                                                                |
| <b>Bias domain</b>            | <b>Question</b>                                                                                          | <b>Score</b>                | <b>Judgement</b>                                                                                                                               |

|                            |                                                                                                          |                      |                                                                                                  |
|----------------------------|----------------------------------------------------------------------------------------------------------|----------------------|--------------------------------------------------------------------------------------------------|
| Confounding                | <b>KQA</b> - Did the study design or analysis account for important confounding and modifying variables? | -                    | Only 11 subjects which means that it is more or less impossible to take confounding into account |
| Detection                  | <b>KQB</b> - Can we be confident in the exposure characterisation?                                       | ++                   |                                                                                                  |
| Detection                  | <b>KQC</b> - Can we be confident in the outcome assessment?                                              | ++                   |                                                                                                  |
| Selection                  | Did selection of study participants result in appropriate comparison groups?                             | -                    | Only 11 out of 80 were examined in this follow-up study                                          |
| Attrition/exclusion        | Were outcome data completely reported without attrition or exclusion from analysis?                      | +                    |                                                                                                  |
| Selective reporting        | Were all measured outcomes reported?                                                                     | ++                   |                                                                                                  |
| <b>Burns et al. (2011)</b> |                                                                                                          | Risk of bias tier: 1 |                                                                                                  |
| <b>Bias domain</b>         | <b>Question</b>                                                                                          | <b>Score</b>         | <b>Judgement</b>                                                                                 |
| Confounding                | <b>KQA</b> - Did the study design or analysis account for important confounding and modifying variables? | +                    | Lack of parental height and weight                                                               |
| Detection                  | <b>KQB</b> - Can we be confident in the exposure characterisation?                                       | +                    | Doubtful whether the study focus on the sensitive exposure window?                               |
| Detection                  | <b>KQC</b> - Can we be confident in the outcome assessment?                                              | ++                   |                                                                                                  |
| Selection                  | Did selection of study participants result in appropriate comparison groups?                             | ++                   |                                                                                                  |
| Attrition/exclusion        | Were outcome data completely reported without attrition or exclusion from analysis?                      | ++                   |                                                                                                  |
| Selective reporting        | Were all measured outcomes reported?                                                                     | ++                   |                                                                                                  |
| <b>Yi et al. (2013)</b>    |                                                                                                          | Risk of bias tier: 2 |                                                                                                  |
| <b>Bias domain</b>         | <b>Question</b>                                                                                          | <b>Score</b>         | <b>Judgement</b>                                                                                 |
| Confounding                | <b>KQA</b> - Did the study design or analysis account for important confounding and modifying variables? | +                    |                                                                                                  |
| Detection                  | <b>KQB</b> - Can we be confident in the exposure characterisation?                                       | -                    | Exposure measured about 40 years after the war.                                                  |
| Detection                  | <b>KQC</b> - Can we be confident in the outcome assessment?                                              | +                    |                                                                                                  |
| Selection                  | Did selection of study participants result in appropriate comparison groups?                             | -                    | Limited/no information about participation rate.                                                 |
| Attrition/exclusion        | Were outcome data completely reported without attrition or exclusion from analysis?                      | ++                   |                                                                                                  |
| Selective reporting        | Were all measured outcomes reported?                                                                     | ++                   |                                                                                                  |
| <b>Waner et al. (2013)</b> |                                                                                                          | Risk of bias tier: 1 |                                                                                                  |
| <b>Bias domain</b>         | <b>Question</b>                                                                                          | <b>Score</b>         | <b>Judgement</b>                                                                                 |
| Confounding                | <b>KQA</b> - Did the study design or analysis account for important confounding and modifying variables? | ++                   |                                                                                                  |
| Detection                  | <b>KQB</b> - Can we be confident in the exposure characterisation?                                       | +                    |                                                                                                  |
| Detection                  | <b>KQC</b> - Can we be confident in the outcome assessment?                                              | +                    |                                                                                                  |

| Selection                    | Did selection of study participants result in appropriate comparison groups?                             | +                           |                                                                                                                  |
|------------------------------|----------------------------------------------------------------------------------------------------------|-----------------------------|------------------------------------------------------------------------------------------------------------------|
| Attrition/exclusion          | Were outcome data completely reported without attrition or exclusion from analysis?                      | ++                          |                                                                                                                  |
| Selective reporting          | Were all measured outcomes reported?                                                                     | ++                          |                                                                                                                  |
| <b>Delvaux et al. (2014)</b> |                                                                                                          | <b>Risk of bias tier: 2</b> |                                                                                                                  |
| Bias domain                  | Question                                                                                                 | Score                       | Judgement                                                                                                        |
| Confounding                  | <b>KQA</b> - Did the study design or analysis account for important confounding and modifying variables? | +                           |                                                                                                                  |
| Detection                    | <b>KQB</b> - Can we be confident in the exposure characterisation?                                       | -                           | No postnatal exposure information.                                                                               |
| Detection                    | <b>KQC</b> - Can we be confident in the outcome assessment?                                              | ++                          |                                                                                                                  |
| Selection                    | Did selection of study participants result in appropriate comparison groups?                             | -                           | Out of 1173 invitation letters only 281 completed the questionnaires and 114 were included in the present study. |
| Attrition/exclusion          | Were outcome data completely reported without attrition or exclusion from analysis?                      | ++                          |                                                                                                                  |
| Selective reporting          | Were all measured outcomes reported?                                                                     | ++                          |                                                                                                                  |
| <b>Iszatt et al. (2016)</b>  |                                                                                                          | <b>Risk of bias tier: 2</b> |                                                                                                                  |
| Bias domain                  | Question                                                                                                 | Score                       | Judgement                                                                                                        |
| Confounding                  | <b>KQA</b> - Did the study design or analysis account for important confounding and modifying variables? | +                           |                                                                                                                  |
| Detection                    | <b>KQB</b> - Can we be confident in the exposure characterisation?                                       | -                           | Different matrixes and different methods used between the populations                                            |
| Detection                    | <b>KQC</b> - Can we be confident in the outcome assessment?                                              | +                           |                                                                                                                  |
| Selection                    | Did selection of study participants result in appropriate comparison groups?                             | -                           | Limited information about the selection of participants.                                                         |
| Attrition/exclusion          | Were outcome data completely reported without attrition or exclusion from analysis?                      | +                           |                                                                                                                  |
| Selective reporting          | Were all measured outcomes reported?                                                                     | ++                          |                                                                                                                  |
| <b>Leijs et al. (2017)</b>   |                                                                                                          | <b>Risk of bias tier: 2</b> |                                                                                                                  |
| Bias domain                  | Question                                                                                                 | Score                       | Judgement                                                                                                        |
| Confounding                  | <b>KQA</b> - Did the study design or analysis account for important confounding and modifying variables? | -                           | Small study, which make it not reasonable to consider confounders in a propitiate way                            |
| Detection                    | <b>KQB</b> - Can we be confident in the exposure characterisation?                                       | +                           |                                                                                                                  |
| Detection                    | <b>KQC</b> - Can we be confident in the outcome assessment?                                              | +                           |                                                                                                                  |
| Selection                    | Did selection of study participants result in appropriate comparison groups?                             | -                           | No information.                                                                                                  |
| Attrition/exclusion          | Were outcome data completely reported without attrition or exclusion from analysis?                      | +                           |                                                                                                                  |
| Selective reporting          | Were all measured outcomes reported?                                                                     | ++                          |                                                                                                                  |

### A.9.6. Studies on cardiovascular effects

**Table 81.** Risk of bias appraisal of studies on cardiovascular effects (combined score of two independent appraisals). Note: appraisal of individual studies focused only on risk of bias; additional quality aspects were considered when evaluating the overall confidence in the body of evidence (see Section 2.2.1.2 of the opinion).

| <b>Calvert et al. (1998)</b>   |                                                                                                          | <b>Risk of bias tier: 1</b> |                                                                                                                                                      |
|--------------------------------|----------------------------------------------------------------------------------------------------------|-----------------------------|------------------------------------------------------------------------------------------------------------------------------------------------------|
| <b>Bias domain</b>             | <b>Question</b>                                                                                          | <b>Score</b>                | <b>Judgement</b>                                                                                                                                     |
| Confounding                    | <b>KQA</b> - Did the study design or analysis account for important confounding and modifying variables? | +                           | Good data on many potential confounders, but not SES.                                                                                                |
| Detection                      | <b>KQB</b> - Can we be confident in the exposure characterisation?                                       | ++                          | Individual TCDD data, current and back-extrapolated.                                                                                                 |
| Detection                      | <b>KQC</b> - Can we be confident in the outcome assessment?                                              | ++                          | Might be some 'recall bias' regarding history, but clinical exams were more important for cardiovascular outcomes, and they were blinded.            |
| Selection                      | Did selection of study participants result in appropriate comparison groups?                             | -                           | Referents from the area but not from the company, so potential "healthy workers selection".                                                          |
| Attrition/exclusion            | Were outcome data completely reported without attrition or exclusion from analysis?                      | +                           | Differential loss of follow-up due to increased mortality in exposed individuals.                                                                    |
| Selective reporting            | Were all measured outcomes reported?                                                                     | ++                          |                                                                                                                                                      |
| <b>Pesatori et al. (1998)</b>  |                                                                                                          | <b>Risk of bias tier: 2</b> |                                                                                                                                                      |
| <b>Bias domain</b>             | <b>Question</b>                                                                                          | <b>Score</b>                | <b>Judgement</b>                                                                                                                                     |
| Confounding                    | <b>KQA</b> - Did the study design or analysis account for important confounding and modifying variables? | --                          | Potential confounders were not assessed on individual level.                                                                                         |
| Detection                      | <b>KQB</b> - Can we be confident in the exposure characterisation?                                       | -                           | Considerable non-differential misclassification, since no individual data were available                                                             |
| Detection                      | <b>KQC</b> - Can we be confident in the outcome assessment?                                              | ++                          |                                                                                                                                                      |
| Selection                      | Did selection of study participants result in appropriate comparison groups?                             | +                           | Participation based on residence. 99% could be followed up. It is however likely that populations were not comparable with the reference population. |
| Attrition/exclusion            | Were outcome data completely reported without attrition or exclusion from analysis?                      | ++                          |                                                                                                                                                      |
| Selective reporting            | Were all measured outcomes reported?                                                                     | ++                          |                                                                                                                                                      |
| <b>Steenland et al. (1999)</b> |                                                                                                          | <b>Risk of bias tier: 2</b> |                                                                                                                                                      |
| <b>Bias domain</b>             | <b>Question</b>                                                                                          | <b>Score</b>                | <b>Judgement</b>                                                                                                                                     |
| Confounding                    | <b>KQA</b> - Did the study design or analysis account for important confounding and modifying variables? | --                          | Lack of data on potential confounders. Increase in lung cancer in those with highest exposure.                                                       |
| Detection                      | <b>KQB</b> - Can we be confident in the exposure characterisation?                                       | -                           | No individual TCDD data, only estimates by JEM. Another paper supports the ranking and gives serum TCDD levels for part of the individuals.          |
| Detection                      | <b>KQC</b> - Can we be confident in the outcome assessment?                                              | ++                          |                                                                                                                                                      |
| Selection                      | Did selection of study participants result in appropriate comparison                                     | +                           | Participation based on company registers. Unclear if they were complete. Internal                                                                    |



|                                    |                                                                                                          |                             |                                                                                                                                                     |
|------------------------------------|----------------------------------------------------------------------------------------------------------|-----------------------------|-----------------------------------------------------------------------------------------------------------------------------------------------------|
|                                    | groups?                                                                                                  |                             | reference group is an advantage.                                                                                                                    |
| Attrition/<br>exclusion            | Were outcome data completely reported without attrition or exclusion from analysis?                      | +                           | Differential loss of follow-up due to increased cancer mortality in exposed individuals.                                                            |
| Selective reporting                | Were all measured outcomes reported?                                                                     | ++                          |                                                                                                                                                     |
| <b>Bertazzi et al. (2001)</b>      |                                                                                                          | <b>Risk of bias tier: 2</b> |                                                                                                                                                     |
| <b>Bias domain</b>                 | <b>Question</b>                                                                                          | <b>Score</b>                | <b>Judgement</b>                                                                                                                                    |
| Confounding                        | <b>KQA</b> - Did the study design or analysis account for important confounding and modifying variables? | --                          | Potential confounders were not assessed on individual level.                                                                                        |
| Detection                          | <b>KQB</b> - Can we be confident in the exposure characterisation?                                       | --                          | Considerable non-differential misclassification, since no individual data were available.                                                           |
| Detection                          | <b>KQC</b> - Can we be confident in the outcome assessment?                                              | ++                          |                                                                                                                                                     |
| Selection                          | Did selection of study participants result in appropriate comparison groups?                             | +                           | Participation based on residence. 99% could be followed up. It is however likely that populations were not comparable with the reference population |
| Attrition/<br>exclusion            | Were outcome data completely reported without attrition or exclusion from analysis?                      | +                           |                                                                                                                                                     |
| Selective reporting                | Were all measured outcomes reported?                                                                     | ++                          |                                                                                                                                                     |
| <b>Ketchum and Michalek (2005)</b> |                                                                                                          | <b>Risk of bias tier: 2</b> |                                                                                                                                                     |
| <b>Bias domain</b>                 | <b>Question</b>                                                                                          | <b>Score</b>                | <b>Judgement</b>                                                                                                                                    |
| Confounding                        | <b>KQA</b> - Did the study design or analysis account for important confounding and modifying variables? | -                           | Smoking and other confounders were not assessed on individual level but were available for a subgroup indicating minor differences.                 |
| Detection                          | <b>KQB</b> - Can we be confident in the exposure characterisation?                                       | -                           | Considerable non-differential misclassification, since individual data were available only in part of the subjects.                                 |
| Detection                          | <b>KQC</b> - Can we be confident in the outcome assessment?                                              | ++                          |                                                                                                                                                     |
| Selection                          | Did selection of study participants result in appropriate comparison groups?                             | +                           | "Recall bias" is possible. Health conditions by interview only.                                                                                     |
| Attrition/<br>exclusion            | Were outcome data completely reported without attrition or exclusion from analysis?                      | +                           | Differential loss of follow-up due to increased mortality in exposed individuals.                                                                   |
| Selective reporting                | Were all measured outcomes reported?                                                                     | ++                          |                                                                                                                                                     |
| <b>Kang et al. (2006)</b>          |                                                                                                          | <b>Risk of bias tier: 2</b> |                                                                                                                                                     |
| <b>Bias domain</b>                 | <b>Question</b>                                                                                          | <b>Score</b>                | <b>Judgement</b>                                                                                                                                    |
| Confounding                        | <b>KQA</b> - Did the study design or analysis account for important confounding and modifying variables? | +                           | Smoking and some other confounders could be adjusted for.                                                                                           |
| Detection                          | <b>KQB</b> - Can we be confident in the exposure characterisation?                                       | --                          | Considerable non-differential misclassification, since individual data were available only for a subgroup.                                          |
| Detection                          | <b>KQC</b> - Can we be confident in the outcome assessment?                                              | +                           | 'Recall bias' is possible. Health conditions by interview only.                                                                                     |
| Selection                          | Did selection of study participants result in appropriate comparison groups?                             | -                           | Participation based on register of military staff. Only 70% could be assessed. An internal reference group similar to the exposed group.            |
| Attrition/<br>exclusion            | Were outcome data completely reported without attrition or                                               | +                           | Differential loss of follow-up due to increased mortality in exposed individuals.                                                                   |



|                               | exclusion from analysis?                                                                                 |                             |                                                                                                                                                                                               |
|-------------------------------|----------------------------------------------------------------------------------------------------------|-----------------------------|-----------------------------------------------------------------------------------------------------------------------------------------------------------------------------------------------|
| Selective reporting           | Were all measured outcomes reported?                                                                     | ++                          |                                                                                                                                                                                               |
| <b>Pelclova et al. (2007)</b> |                                                                                                          | <b>Risk of bias tier: 2</b> |                                                                                                                                                                                               |
| Bias domain                   | Question                                                                                                 | Score                       | Judgement                                                                                                                                                                                     |
| Confounding                   | <b>KQA</b> - Did the study design or analysis account for important confounding and modifying variables? | -                           | The exposed group was not healthy, but the control group was.                                                                                                                                 |
| Detection                     | <b>KQB</b> - Can we be confident in the exposure characterisation?                                       | ++                          | Individual TCDD data                                                                                                                                                                          |
| Detection                     | <b>KQC</b> - Can we be confident in the outcome assessment?                                              | +                           | This method is highly dependent on examiner. Hopefully the same person examined exposed and controls.                                                                                         |
| Selection                     | Did selection of study participants result in appropriate comparison groups?                             | --                          | Selection of exposed group (N=15) not described. Control group (N=14) not comparable.                                                                                                         |
| Attrition/exclusion           | Were outcome data completely reported without attrition or exclusion from analysis?                      | ++                          |                                                                                                                                                                                               |
| Selective reporting           | Were all measured outcomes reported?                                                                     | ++                          |                                                                                                                                                                                               |
| <b>Pelclova et al. (2009)</b> |                                                                                                          | <b>Risk of bias tier: 2</b> |                                                                                                                                                                                               |
| Bias domain                   | Question                                                                                                 | Score                       | Judgement                                                                                                                                                                                     |
| Confounding                   | <b>KQA</b> - Did the study design or analysis account for important confounding and modifying variables? | -                           | Not adjusted, too low N                                                                                                                                                                       |
| Detection                     | <b>KQB</b> - Can we be confident in the exposure characterisation?                                       | ++                          | Individual TCDD data.                                                                                                                                                                         |
| Detection                     | <b>KQC</b> - Can we be confident in the outcome assessment?                                              | +                           |                                                                                                                                                                                               |
| Selection                     | Did selection of study participants result in appropriate comparison groups?                             | --                          | Selection of cases (n=11) not described. No control group.                                                                                                                                    |
| Attrition/exclusion           | Were outcome data completely reported without attrition or exclusion from analysis?                      | -                           |                                                                                                                                                                                               |
| Selective reporting           | Were all measured outcomes reported?                                                                     | ++                          |                                                                                                                                                                                               |
| <b>Boers et al. (2010)</b>    |                                                                                                          | <b>Risk of bias tier: 2</b> |                                                                                                                                                                                               |
| Bias domain                   | Question                                                                                                 | Score                       | Judgement                                                                                                                                                                                     |
| Confounding                   | <b>KQA</b> - Did the study design or analysis account for important confounding and modifying variables? | -                           | Lack of data on potential confounders, but smoking prevalence was considered similar to referents                                                                                             |
| Detection                     | <b>KQB</b> - Can we be confident in the exposure characterisation?                                       | +                           | Individual TCDD data only for a subgroup, but the difference between "exposed" and non-exposed is valid. However non-differential misclassification is likely to be large in the ER analyses. |
| Detection                     | <b>KQC</b> - Can we be confident in the outcome assessment?                                              | ++                          |                                                                                                                                                                                               |
| Selection                     | Did selection of study participants result in appropriate comparison groups?                             | -                           | Participation based on complete company registers. External reference group with likely some "healthy worker selection"                                                                       |
| Attrition/exclusion           | Were outcome data completely reported without attrition or exclusion from analysis?                      | +                           | Differential loss of follow-up due to increased mortality in cancer in exposed individuals.                                                                                                   |
| Selective reporting           | Were all measured outcomes reported?                                                                     | ++                          |                                                                                                                                                                                               |
| <b>Manuwald et al. (2012)</b> |                                                                                                          | <b>Risk of bias tier: 2</b> |                                                                                                                                                                                               |

| Bias domain                | Question                                                                                                 | Score                       | Judgement                                                                                                                                                                                                                                                                                   |
|----------------------------|----------------------------------------------------------------------------------------------------------|-----------------------------|---------------------------------------------------------------------------------------------------------------------------------------------------------------------------------------------------------------------------------------------------------------------------------------------|
| Confounding                | <b>KQA</b> - Did the study design or analysis account for important confounding and modifying variables? | -                           | Lack of data on potential confounders, but smoking prevalence was considered similar to referents.                                                                                                                                                                                          |
| Detection                  | <b>KQB</b> - Can we be confident in the exposure characterisation?                                       | -                           | Individual TCDD data only for a subgroup, so likely non-differential misclassification in the ER analyses.                                                                                                                                                                                  |
| Detection                  | <b>KQC</b> - Can we be confident in the outcome assessment?                                              | ++                          |                                                                                                                                                                                                                                                                                             |
| Selection                  | Did selection of study participants result in appropriate comparison groups?                             | +                           | Participation based on company registers. External reference group with likely some "healthy worker selection".                                                                                                                                                                             |
| Attrition/exclusion        | Were outcome data completely reported without attrition or exclusion from analysis?                      | +                           | Differential loss of follow-up due to increased mortality in cancer in exposed individuals.                                                                                                                                                                                                 |
| Selective reporting        | Were all measured outcomes reported?                                                                     | ++                          |                                                                                                                                                                                                                                                                                             |
| <b>Lin et al. (2012b)</b>  |                                                                                                          | <b>Risk of bias tier: 1</b> |                                                                                                                                                                                                                                                                                             |
| Bias domain                | Question                                                                                                 | Score                       | Judgement                                                                                                                                                                                                                                                                                   |
| Confounding                | <b>KQA</b> - Did the study design or analysis account for important confounding and modifying variables? | +                           | Age, gender, body mass index, race/ethnicity, cigarette smoking, and alcohol consumption were accounted for. Age was by far the strongest predictor. Given the large age interval (40 to 65+) of the study, not properly reported, residual confounding by age might be a potential problem |
| Detection                  | <b>KQB</b> - Can we be confident in the exposure characterisation?                                       | ++                          |                                                                                                                                                                                                                                                                                             |
| Detection                  | <b>KQC</b> - Can we be confident in the outcome assessment?                                              | +                           | Information on mortality was missing for about 11%.                                                                                                                                                                                                                                         |
| Selection                  | Did selection of study participants result in appropriate comparison groups?                             | -                           | The large age interval at baseline would have resulted in overrepresentation of older adults among those who are more highly exposed. Most of the mortality are likely to have occurred in this group which makes residual confounding somewhat likely.                                     |
| Attrition/exclusion        | Were outcome data completely reported without attrition or exclusion from analysis?                      | +                           |                                                                                                                                                                                                                                                                                             |
| Selective reporting        | Were all measured outcomes reported?                                                                     | ++                          |                                                                                                                                                                                                                                                                                             |
| <b>Cypel et al. (2016)</b> |                                                                                                          | <b>Risk of bias tier: 2</b> |                                                                                                                                                                                                                                                                                             |
| Bias domain                | Question                                                                                                 | Score                       | Judgement                                                                                                                                                                                                                                                                                   |
| Confounding                | <b>KQA</b> - Did the study design or analysis account for important confounding and modifying variables? | +                           |                                                                                                                                                                                                                                                                                             |
| Detection                  | <b>KQB</b> - Can we be confident in the exposure characterisation?                                       | -                           | Considerable non-differential misclassification. Individual TCDD in only 20%, and only once. Exposure characterisation is crude (previous service status).                                                                                                                                  |
| Detection                  | <b>KQC</b> - Can we be confident in the outcome assessment?                                              | +                           |                                                                                                                                                                                                                                                                                             |
| Selection                  | Did selection of study participants result in appropriate comparison groups?                             | -                           | Participation based on register of military staff. Only "survivors" could be included.                                                                                                                                                                                                      |
| Attrition/exclusion        | Were outcome data completely reported without attrition or                                               | +                           | Only "survivors" included. Differential loss of follow-up.                                                                                                                                                                                                                                  |

|                     |                                      |    |
|---------------------|--------------------------------------|----|
|                     | exclusion from analysis?             |    |
| Selective reporting | Were all measured outcomes reported? | ++ |

### A.9.7. Studies on hepatic disorders and digestive effects

**Table 82.** Risk of bias appraisal of studies on hepatic disorders and digestive effects (scores corresponding to one appraisal). Note: appraisal of individual studies focused only on risk of bias; additional quality aspects were considered when evaluating the overall confidence in the body of evidence (see Section 2.2.1.2 of the opinion).

| <b>Neuberger et al. (1999)</b>  |                                                                                                          | <b>Risk of bias tier: 1</b> |                                                                                                                                                                                                                                                                                                                     |
|---------------------------------|----------------------------------------------------------------------------------------------------------|-----------------------------|---------------------------------------------------------------------------------------------------------------------------------------------------------------------------------------------------------------------------------------------------------------------------------------------------------------------|
| <b>Bias domain</b>              | <b>Question</b>                                                                                          | <b>Score</b>                | <b>Judgement</b>                                                                                                                                                                                                                                                                                                    |
| Confounding                     | <b>KQA</b> - Did the study design or analysis account for important confounding and modifying variables? | +                           | Partial consideration of confounders including age, smoking, alcohol, same physician assessment. Assessments blinded for exposure status.                                                                                                                                                                           |
| Detection                       | <b>KQB</b> - Can we be confident in the exposure characterisation?                                       | ++                          | Exposure to TCDD occupationally and quantitated by certified methods and laboratory close in time to assessment.                                                                                                                                                                                                    |
| Detection                       | <b>KQC</b> - Can we be confident in the outcome assessment?                                              | +                           | Some data from questionnaires                                                                                                                                                                                                                                                                                       |
| Selection                       | Did selection of study participants result in appropriate comparison groups?                             | +                           | Control group was matched occupational group but not to TCDD. Overall numbers relatively small.                                                                                                                                                                                                                     |
| Attrition/exclusion             | Were outcome data completely reported without attrition or exclusion from analysis?                      | +                           | Significant proportion of those originally mailed and known to have been exposed, did not respond or under other physicians. However, not associated statistically with previously known medical history or other parameters. 90% of agreed participants donated blood for clinical chemistry and TCDD measurement. |
| Selective reporting             | Were all measured outcomes reported?                                                                     | ++                          |                                                                                                                                                                                                                                                                                                                     |
| <b>Michalek et al. (2001a)</b>  |                                                                                                          | <b>Risk of bias tier: 1</b> |                                                                                                                                                                                                                                                                                                                     |
| <b>Bias domain</b>              | <b>Question</b>                                                                                          | <b>Score</b>                | <b>Judgement</b>                                                                                                                                                                                                                                                                                                    |
| Confounding                     | <b>KQA</b> - Did the study design or analysis account for important confounding and modifying variables? | ++                          | Many known confounders of adjusted for.                                                                                                                                                                                                                                                                             |
| Detection                       | <b>KQB</b> - Can we be confident in the exposure characterisation?                                       | +                           | Although original analyses were acceptable this involved subsequent extrapolations for others. Some exposures very close to detection limit.                                                                                                                                                                        |
| Detection                       | <b>KQC</b> - Can we be confident in the outcome assessment?                                              | +                           | Medical examinations and additional plasma chemistry determined but limitation of interpretation without more detailed studies.                                                                                                                                                                                     |
| Selection                       | Did selection of study participants result in appropriate comparison groups?                             | +                           | Apparently                                                                                                                                                                                                                                                                                                          |
| Attrition/exclusion             | Were outcome data completely reported without attrition or exclusion from analysis?                      | +                           |                                                                                                                                                                                                                                                                                                                     |
| Selective reporting             | Were all measured outcomes reported?                                                                     | +                           | No                                                                                                                                                                                                                                                                                                                  |
| <b>Baccarelli et al. (2005)</b> |                                                                                                          | <b>Risk of bias tier: 1</b> |                                                                                                                                                                                                                                                                                                                     |
| <b>Bias domain</b>              | <b>Question</b>                                                                                          | <b>Score</b>                | <b>Judgement</b>                                                                                                                                                                                                                                                                                                    |

|                                    |                                                                                                          |                             |                                                                                                                                             |
|------------------------------------|----------------------------------------------------------------------------------------------------------|-----------------------------|---------------------------------------------------------------------------------------------------------------------------------------------|
| Confounding                        | <b>KQA</b> - Did the study design or analysis account for important confounding and modifying variables? | +                           | Adjusted for age sex and residence.                                                                                                         |
| Detection                          | <b>KQB</b> - Can we be confident in the exposure characterisation?                                       | +                           | TCDD was quantitated by CDC with acceptable technology and accuracy.                                                                        |
| Detection                          | <b>KQC</b> - Can we be confident in the outcome assessment?                                              | +                           | Clinical data was acceptable but limited. More in depth investigations might have been invasive but more informative.                       |
| Selection                          | Did selection of study participants result in appropriate comparison groups?                             | +                           | Comparison group sizes were acceptable as an indication but larger group sizes would have greatly increased confidence.                     |
| Attrition/exclusion                | Were outcome data completely reported without attrition or exclusion from analysis?                      | +                           | Attrition of some data was noted.                                                                                                           |
| Selective reporting                | Were all measured outcomes reported?                                                                     | +                           | Apparently so given the limited objectives                                                                                                  |
| <b>Ketchum and Michalek (2005)</b> |                                                                                                          | <b>Risk of bias tier: 2</b> |                                                                                                                                             |
| <b>Bias domain</b>                 | <b>Question</b>                                                                                          | <b>Score</b>                | <b>Judgement</b>                                                                                                                            |
| Confounding                        | <b>KQA</b> - Did the study design or analysis account for important confounding and modifying variables? | -                           | Not as full as other related studies for this cohort and endpoint                                                                           |
| Detection                          | <b>KQB</b> - Can we be confident in the exposure characterisation?                                       | -                           | Although original analyses were acceptable this involved subsequent extrapolations for othes. Some exposures very close to detection limit. |
| Detection                          | <b>KQC</b> - Can we be confident in the outcome assessment?                                              | -                           | Minimum data                                                                                                                                |
| Selection                          | Did selection of study participants result in appropriate comparison groups?                             | +                           | Within limitations of exposure data                                                                                                         |
| Attrition/exclusion                | Were outcome data completely reported without attrition or exclusion from analysis?                      | +                           |                                                                                                                                             |
| Selective reporting                | Were all measured outcomes reported?                                                                     | +                           |                                                                                                                                             |
| <b>Boers et al. (2010)</b>         |                                                                                                          | <b>Risk of bias tier: 2</b> |                                                                                                                                             |
| <b>Bias domain</b>                 | <b>Question</b>                                                                                          | <b>Score</b>                | <b>Judgement</b>                                                                                                                            |
| Confounding                        | <b>KQA</b> - Did the study design or analysis account for important confounding and modifying variables? | -                           | Minimal confounder data                                                                                                                     |
| Detection                          | <b>KQB</b> - Can we be confident in the exposure characterisation?                                       | +                           | Probably valid but limited data on some as back extrapolated.                                                                               |
| Detection                          | <b>KQC</b> - Can we be confident in the outcome assessment?                                              | +                           | Probably good but limited based on death certificates.                                                                                      |
| Selection                          | Did selection of study participants result in appropriate comparison groups?                             | +                           | Satisfactory with limited data.                                                                                                             |
| Attrition/exclusion                | Were outcome data completely reported without attrition or exclusion from analysis?                      | +                           | Some attrition. Deaths considered after lack of significant long term exposure excluded.                                                    |
| Selective reporting                | Were all measured outcomes reported?                                                                     | ++                          |                                                                                                                                             |

### A.9.8. Studies on effects in the immune system

**Table 83.** Risk of bias appraisal of studies on effects on the immune system (scores corresponding to one appraisal). Note: appraisal of individual studies focused only on risk of bias; additional quality aspects were considered when evaluating the overall confidence in the body of evidence (see Section 2.2.1.2 of the opinion).

| <b>STUDIES IN ADULTS</b>      |                                                                                                          |                             |                                                                                                                                                                                                                                                                                                                                                                       |
|-------------------------------|----------------------------------------------------------------------------------------------------------|-----------------------------|-----------------------------------------------------------------------------------------------------------------------------------------------------------------------------------------------------------------------------------------------------------------------------------------------------------------------------------------------------------------------|
| <b>Jung et al. (1998)</b>     |                                                                                                          | <b>Risk of bias tier: 2</b> |                                                                                                                                                                                                                                                                                                                                                                       |
| <b>Bias domain</b>            | <b>Question</b>                                                                                          | <b>Score</b>                | <b>Judgement</b>                                                                                                                                                                                                                                                                                                                                                      |
| Confounding                   | <b>KQA</b> - Did the study design or analysis account for important confounding and modifying variables? | -                           | The subjects in the study are factory workers. Concomitant exposures to other chemicals was not monitored                                                                                                                                                                                                                                                             |
| Detection                     | <b>KQB</b> - Can we be confident in the exposure characterisation?                                       | +                           | Exposure in the selected subject group was available from tests done on blood by CDC-Atlanta. No details on the methods were given, but the stature of CDC and ERGO Hamburg ensures adequacy. For some individuals exposure data at the time of immunologic testing was not available, but these were extrapolated based on earlier measurements and half-life times. |
| Detection                     | <b>KQC</b> - Can we be confident in the outcome assessment?                                              | +                           | The outcomes are performed in clinical settings and seem adequate therefore. The chromate sensitivity test on proliferating lymphocytes, the only one showing an immunotoxic effect, is not a well-accepted widely used assay.                                                                                                                                        |
| Selection                     | Did selection of study participants result in appropriate comparison groups?                             | +                           | There is information that the cases and controls were similar in a number of aspects, i.e. age, social status, smoking.                                                                                                                                                                                                                                               |
| Attrition/exclusion           | Were outcome data completely reported without attrition or exclusion from analysis?                      | +                           | The subjects enrolled in the ultimate study were selected from a much bigger group of people, in principle based on volunteering to participate. Of the people eventually enrolled, no people were missing in the analysis.                                                                                                                                           |
| Selective reporting           | Were all measured outcomes reported?                                                                     | ++                          | All measures foreseen seem to be carried out                                                                                                                                                                                                                                                                                                                          |
| <b>Halperin et al. (1998)</b> |                                                                                                          | <b>Risk of bias tier: 2</b> |                                                                                                                                                                                                                                                                                                                                                                       |
| <b>Bias domain</b>            | <b>Question</b>                                                                                          | <b>Score</b>                | <b>Judgement</b>                                                                                                                                                                                                                                                                                                                                                      |
| Confounding                   | <b>KQA</b> - Did the study design or analysis account for important confounding and modifying variables? | -                           | Age, smoking, alcohol use were accounted for. Other occupational exposures might have occurred.                                                                                                                                                                                                                                                                       |
| Detection                     | <b>KQB</b> - Can we be confident in the exposure characterisation?                                       | +                           | The method for measuring exposure was described in an earlier paper (Shop et al., 1989). Measures in controls were not executed in all subjects, but just random, and all non-measured subjects were deemed to be within the range of the measured ones.                                                                                                              |
| Detection                     | <b>KQC</b> - Can we be confident in the outcome assessment?                                              | ++                          | Immunologic methods were standard.                                                                                                                                                                                                                                                                                                                                    |
| Selection                     | Did selection of study participants result in appropriate comparison groups?                             | ++                          | Workers of 2 plants were recruited. Exposure over a long time, but cross sectional analysis carried out in 2 years, 1987 and 1988. Matched controls were selected from the same neighborhood as where subjects lived.                                                                                                                                                 |
| Attrition/exclusion           | Were outcome data completely reported without attrition or exclusion from analysis?                      | +                           | Selection results were explained, and there are few subjects missing or excluded.                                                                                                                                                                                                                                                                                     |
| Selective                     | Were all measured outcomes                                                                               | +                           | There is no indication that outcomes have not                                                                                                                                                                                                                                                                                                                         |

| reporting                      | reported?                                                                                                |                             | been reported.                                                                                                                                                                                                                                                                                                                                                           |
|--------------------------------|----------------------------------------------------------------------------------------------------------|-----------------------------|--------------------------------------------------------------------------------------------------------------------------------------------------------------------------------------------------------------------------------------------------------------------------------------------------------------------------------------------------------------------------|
| <b>Michalek et al. (1999b)</b> |                                                                                                          | <b>Risk of bias tier: 2</b> |                                                                                                                                                                                                                                                                                                                                                                          |
| Bias domain                    | Question                                                                                                 | Score                       | Judgement                                                                                                                                                                                                                                                                                                                                                                |
| Confounding                    | <b>KQA</b> - Did the study design or analysis account for important confounding and modifying variables? | +                           | The authors indicate correction for confounders. The paper does not indicate which, and these may be also in Wolfe et al. (1995). However, the authors themselves indicate that there may be confounders that are unknown.                                                                                                                                               |
| Detection                      | <b>KQB</b> - Can we be confident in the exposure characterisation?                                       | -                           | There is no indication of how dioxin was measured (but there was a reference to Roegner et al., 1991). The measurements on dioxin were made as long as 30 years after exposure in Vietnam, and the time since exposure varied 2- to 3-TCDD half-lives. The measures in 1997 and 1992 were extrapolated to the time in service, to put the subjects into four categories. |
| Detection                      | <b>KQC</b> - Can we be confident in the outcome assessment?                                              | +                           | Immune tests were well described, although the source of antibodies for immunoglobulin measurement, and autoantibody tests were not given.                                                                                                                                                                                                                               |
| Selection                      | Did selection of study participants result in appropriate comparison groups?                             | ++                          | Wolfe et al. (1990) provides the details of the subjects.                                                                                                                                                                                                                                                                                                                |
| Attrition/exclusion            | Were outcome data completely reported without attrition or exclusion from analysis?                      | ++                          | The study indicates the low number of subjects removed from the study and the reasons why.                                                                                                                                                                                                                                                                               |
| Selective reporting            | Were all measured outcomes reported?                                                                     | ++                          | Whereas the a priori protocol was not provided, it appears that all tests foreseen were done                                                                                                                                                                                                                                                                             |
| <b>Kitamura et al. (2000)</b>  |                                                                                                          | <b>Risk of bias tier: 2</b> |                                                                                                                                                                                                                                                                                                                                                                          |
| Bias domain                    | Question                                                                                                 | Score                       | Judgement                                                                                                                                                                                                                                                                                                                                                                |
| Confounding                    | <b>KQA</b> - Did the study design or analysis account for important confounding and modifying variables? | ++                          | Weight, life style, health status were investigated. Corrections for age, smoking, alcohol were done and had an impact on the outcome.                                                                                                                                                                                                                                   |
| Detection                      | <b>KQB</b> - Can we be confident in the exposure characterisation?                                       | ++                          | Exposure assessment was done according standard methods and in the same time frame.                                                                                                                                                                                                                                                                                      |
| Detection                      | <b>KQC</b> - Can we be confident in the outcome assessment?                                              | -                           | The outcome measures done seem straightforward, but little information is provided on how these measures are done.                                                                                                                                                                                                                                                       |
| Selection                      | Did selection of study participants result in appropriate comparison groups?                             | --                          | There was indication of the subjects living in different areas. Workplaces were quite different. Response rates were not given.                                                                                                                                                                                                                                          |
| Attrition/exclusion            | Were outcome data completely reported without attrition or exclusion from analysis?                      | +                           | Of 96 individuals, 88 were tested. Of 8 the blood clotted and no analyses could be done.                                                                                                                                                                                                                                                                                 |
| Selective reporting            | Were all measured outcomes reported?                                                                     | +                           | From the text it seems that all individuals except the 8 mentioned earlier have been tested and data were presented.                                                                                                                                                                                                                                                     |
| <b>Nagayama et al. (2001)</b>  |                                                                                                          | <b>Risk of bias tier: 2</b> |                                                                                                                                                                                                                                                                                                                                                                          |
| Bias domain                    | Question                                                                                                 | Score                       | Judgement                                                                                                                                                                                                                                                                                                                                                                |
| Confounding                    | <b>KQA</b> - Did the study design or analysis account for important confounding and modifying variables? | -                           | There is no information on possible confounders.                                                                                                                                                                                                                                                                                                                         |
| Detection                      | <b>KQB</b> - Can we be confident in the exposure characterisation?                                       | ++                          | Blood was collected from Sept 94-Nov 95, and analysed for PCDD/Fs and DL-PCBs, using GC-MS, TEQs were calculated.                                                                                                                                                                                                                                                        |
| Detection                      | <b>KQC</b> - Can we be confident in the outcome assessment?                                              | +                           | There seems little information on how subpopulations of lymphocytes were determined other than by indirect fluorescence. Antibody                                                                                                                                                                                                                                        |



|                                 |                                                                                                          |                             | titres were measured by latex agglutination immunoassay using polyclonal antibodies.                                                                                                                                                                                                                                                                                                                                                                                          |
|---------------------------------|----------------------------------------------------------------------------------------------------------|-----------------------------|-------------------------------------------------------------------------------------------------------------------------------------------------------------------------------------------------------------------------------------------------------------------------------------------------------------------------------------------------------------------------------------------------------------------------------------------------------------------------------|
| Selection                       | Did selection of study participants result in appropriate comparison groups?                             | -                           | Except for the fact that the subjects were Yusho patients, there is no other information other than the age range.                                                                                                                                                                                                                                                                                                                                                            |
| Attrition/exclusion             | Were outcome data completely reported without attrition or exclusion from analysis?                      | -                           | 83 patients were recruited from which blood was taken to measure exposure. 16 were selected for measurement of thyroid hormones and lymphocyte subpopulations. Immunoglobulins and antibodies were measured in another 69 patients. The rationale for the selection was not indicated.                                                                                                                                                                                        |
| Selective reporting             | Were all measured outcomes reported?                                                                     | ++                          | It seems that all measures planned were carried out.                                                                                                                                                                                                                                                                                                                                                                                                                          |
| <b>Baccarelli et al. (2002)</b> |                                                                                                          | <b>Risk of bias tier: 2</b> |                                                                                                                                                                                                                                                                                                                                                                                                                                                                               |
| <b>Baccarelli et al. (2004)</b> |                                                                                                          | <b>Risk of bias tier: 2</b> |                                                                                                                                                                                                                                                                                                                                                                                                                                                                               |
| Bias domain                     | Question                                                                                                 | Score                       | Judgement                                                                                                                                                                                                                                                                                                                                                                                                                                                                     |
| Confounding                     | <b>KQA</b> - Did the study design or analysis account for important confounding and modifying variables? | +                           | The subjects in the cohorts were sex, age, and cigarette smoking matched. Other confounders may be there but were not reported.                                                                                                                                                                                                                                                                                                                                               |
| Detection                       | <b>KQB</b> - Can we be confident in the exposure characterisation?                                       | ++                          | TCDD exposure in plasma was assessed by CDC according adequate methodology.                                                                                                                                                                                                                                                                                                                                                                                                   |
| Detection                       | <b>KQC</b> - Can we be confident in the outcome assessment?                                              | +                           | Immune parameters were measured according accepted methods.                                                                                                                                                                                                                                                                                                                                                                                                                   |
| Selection                       | Did selection of study participants result in appropriate comparison groups?                             | -                           | Two small studies, likely using same subjects and therefore partly overlapping recruited at random from the Seveso Cohort. Although randomly selected no demographic characteristics were given.                                                                                                                                                                                                                                                                              |
| Attrition/exclusion             | Were outcome data completely reported without attrition or exclusion from analysis?                      | -                           | The studies are possibly over overlapping but this is not clearly stated in the publications. In addition, the numbers of subjects are not fully identical. Hence it is not clear if the outcomes were all reported.                                                                                                                                                                                                                                                          |
| Selective reporting             | Were all measured outcomes reported?                                                                     | -                           | In as far as it can be seen from the reports what was intended to measure, all was performed.                                                                                                                                                                                                                                                                                                                                                                                 |
| <b>Baccarelli et al. (2005)</b> |                                                                                                          | <b>Risk of bias tier: 2</b> |                                                                                                                                                                                                                                                                                                                                                                                                                                                                               |
| Bias domain                     | Question                                                                                                 | Score                       | Judgement                                                                                                                                                                                                                                                                                                                                                                                                                                                                     |
| Confounding                     | <b>KQA</b> - Did the study design or analysis account for important confounding and modifying variables? | +                           | Correction for an age was done, information on other confounders was not presented.                                                                                                                                                                                                                                                                                                                                                                                           |
| Detection                       | <b>KQB</b> - Can we be confident in the exposure characterisation?                                       | ++                          | TCDD exposure in plasma was assessed by CDC according adequate methodology.                                                                                                                                                                                                                                                                                                                                                                                                   |
| Detection                       | <b>KQC</b> - Can we be confident in the outcome assessment?                                              | --                          | The outcome in terms of immune effects, i.e. questionnaire based allergies. Jaundice and herpes. Respiratory disease is very insensitive and unprecise to draw conclusions on the immune system.                                                                                                                                                                                                                                                                              |
| Selection                       | Did selection of study participants result in appropriate comparison groups?                             | -                           | Diagnosed chloracne patients were recruited from the Seveso area who had lived there around the time of the accident, and matched controls were recruited from the same area. In addition, an additional control group was added from the same area. Whereas demographics were investigated, no information was provided to show the comparability of the group. There was an age difference between exposed and non-exposed (age at the time of the accident 8 vs 21 years). |

| Attrition/<br>exclusion                                                                                              | Were outcome data completely reported without attrition or exclusion from analysis?                      | ++                          | This is in part a case control study and in part a cross sectional study. Of the individuals enrolled, there is information on loss of subjects or missing data and how this was dealt with.                                                                                                                                                                                                                                                                                         |
|----------------------------------------------------------------------------------------------------------------------|----------------------------------------------------------------------------------------------------------|-----------------------------|--------------------------------------------------------------------------------------------------------------------------------------------------------------------------------------------------------------------------------------------------------------------------------------------------------------------------------------------------------------------------------------------------------------------------------------------------------------------------------------|
| Selective reporting                                                                                                  | Were all measured outcomes reported?                                                                     | +                           | There is no specific information on the research questions a priori, but it may be assumed the authors did what they set out to do.                                                                                                                                                                                                                                                                                                                                                  |
| <b>Saberi-Hosnijeh et al. (2011)</b><br><b>Saberi-Hosnijeh et al. (2012)</b><br><b>Saberi-Hosnijeh et al. (2013)</b> |                                                                                                          | <b>Risk of bias tier: 2</b> |                                                                                                                                                                                                                                                                                                                                                                                                                                                                                      |
| Bias domain                                                                                                          | Question                                                                                                 | Score                       | Judgement                                                                                                                                                                                                                                                                                                                                                                                                                                                                            |
| Confounding                                                                                                          | <b>KQA</b> - Did the study design or analysis account for important confounding and modifying variables? | --                          | Other occupational exposure or residual confounding has not been taken into account                                                                                                                                                                                                                                                                                                                                                                                                  |
| Detection                                                                                                            | <b>KQB</b> - Can we be confident in the exposure characterisation?                                       | -                           | Measures of exposure were done well, but decades after exposure had taken place, and the exposures were modelled based on kinetic modelling.                                                                                                                                                                                                                                                                                                                                         |
| Detection                                                                                                            | <b>KQC</b> - Can we be confident in the outcome assessment?                                              | +                           | Outcome measures were not addressing functionality of the immune system, but could indicate dysregulation.                                                                                                                                                                                                                                                                                                                                                                           |
| Selection                                                                                                            | Did selection of study participants result in appropriate comparison groups?                             | -                           | The subjects in this cross sectional study were tested several decades after the first exposures had started. The three reports are not based on the identical subjects, but the cohorts were overlapping. Whereas there is an indication of relative similarity between exposed and non-exposed at the time of measurements (2007-2008), it cannot be concluded that the history of the subjects have been comparable. Moreover, the non-exposed subjects were not closely matched. |
| Attrition/<br>exclusion                                                                                              | Were outcome data completely reported without attrition or exclusion from analysis?                      | +                           | At the time of exposure measurement and outcome analysis, all outcomes were reported. For an association of exposure with eczema, the only parameter that showed a significant correlation, individuals with chronic disease (not necessarily related to atopic eczema) were excluded.                                                                                                                                                                                               |
| Selective reporting                                                                                                  | Were all measured outcomes reported?                                                                     | ++                          | After measurement of exposure in serum and outcome measurement, all data were reported.                                                                                                                                                                                                                                                                                                                                                                                              |
| <b>Nakamoto et al. (2013)</b>                                                                                        |                                                                                                          | <b>Risk of bias tier: 2</b> |                                                                                                                                                                                                                                                                                                                                                                                                                                                                                      |
| Bias domain                                                                                                          | Question                                                                                                 | Score                       | Judgement                                                                                                                                                                                                                                                                                                                                                                                                                                                                            |
| Confounding                                                                                                          | <b>KQA</b> - Did the study design or analysis account for important confounding and modifying variables? | ++                          | Age, BMI, diet were all considered. Especially fatty acids in food was tested as confounder but no significant confounding was noted.                                                                                                                                                                                                                                                                                                                                                |
| Detection                                                                                                            | <b>KQB</b> - Can we be confident in the exposure characterisation?                                       | ++                          | Serum analysis of exposure has been described well and data are clear. It should be noted that the development of atopic dermatitis takes place at young age, whereas the exposure levels were measured at adulthood.                                                                                                                                                                                                                                                                |
| Detection                                                                                                            | <b>KQC</b> - Can we be confident in the outcome assessment?                                              | --                          | The outcomes regarding the immune system (rhinitis and atopic dermatitis) were self-reported and not clinically verified. Whereas the subjects would not have been aware of their exposure, it is not possible to draw a conclusion in terms of the true nature of the outcome, which may not be related to allergy. Hence, the outcome measure is too non-specific.                                                                                                                 |
| Selection                                                                                                            | Did selection of study participants result in                                                            | ++                          | Large cross sectional study. Subjects are well characterized, albeit recruited                                                                                                                                                                                                                                                                                                                                                                                                       |



|                                               |                                                                                                          |                             |                                                                                                                                                                                             |
|-----------------------------------------------|----------------------------------------------------------------------------------------------------------|-----------------------------|---------------------------------------------------------------------------------------------------------------------------------------------------------------------------------------------|
|                                               | appropriate comparison groups?                                                                           |                             | over a long period (2002–2010).                                                                                                                                                             |
| Attrition/exclusion                           | Were outcome data completely reported without attrition or exclusion from analysis?                      | ++                          | There were very few subjects eventually excluded from the study because of severe anemia, or missing serum analysis of exposure.                                                            |
| Selective reporting                           | Were all measured outcomes reported?                                                                     | ++                          |                                                                                                                                                                                             |
| <b>Croes et al. (2014)</b>                    |                                                                                                          | <b>Risk of bias tier: 2</b> |                                                                                                                                                                                             |
| <b>Bias domain</b>                            | <b>Question</b>                                                                                          | <b>Score</b>                | <b>Judgement</b>                                                                                                                                                                            |
| Confounding                                   | <b>KQA</b> - Did the study design or analysis account for important confounding and modifying variables? | -                           | Main confounders were taken into account, although it is not always clear how, there is information on education, breastfeeding, food consumption, (passive) smoking, and asthma in family. |
| Detection                                     | <b>KQB</b> - Can we be confident in the exposure characterisation?                                       | ++                          | Exposure (PCDD/Fs, DL-PCBs) was assessed in blood of all individuals recruited, and according state to the art approaches.                                                                  |
| Detection                                     | <b>KQC</b> - Can we be confident in the outcome assessment?                                              | ++                          | Asthma, animal allergy and hay fever were doctor diagnosed.                                                                                                                                 |
| Selection                                     | Did selection of study participants result in appropriate comparison groups?                             | ++                          | Cross-sectional study in two periods (2008-2009 and 2010). The characteristics of subjects are described in supplementary information. Subjects were all adolescents.                       |
| Attrition/exclusion                           | Were outcome data completely reported without attrition or exclusion from analysis?                      | +                           | It is a cross sectional study, and there is no indication that subjects were excluded after the eventual selection.                                                                         |
| Selective reporting                           | Were all measured outcomes reported?                                                                     | ++                          | All measures foreseen were carried out.                                                                                                                                                     |
| <b>Dinse et al. (2016)</b>                    |                                                                                                          | <b>Risk of bias tier: 1</b> |                                                                                                                                                                                             |
| <b>Bias domain</b>                            | <b>Question</b>                                                                                          | <b>Score</b>                | <b>Judgement</b>                                                                                                                                                                            |
| Confounding                                   | <b>KQA</b> - Did the study design or analysis account for important confounding and modifying variables? | +                           | There was some information on possible confounding, nulli- or multiparous, age, but not smoking, breast feeding.                                                                            |
| Detection                                     | <b>KQB</b> - Can we be confident in the exposure characterisation?                                       | +                           | There is no detailed information on the approach used to assess exposure. Yet, as a part of NHANES, it is likely adequate.                                                                  |
| Detection                                     | <b>KQC</b> - Can we be confident in the outcome assessment?                                              | +                           | There is little information on how the ANA determinations were done, although being di=one in the context of NHANES I am inclined to think it has been done adequately.                     |
| Selection                                     | Did selection of study participants result in appropriate comparison groups?                             | +                           | 7,106 subjects in the NHANES study were included in a multi-stage strategy to ensure representativeness. Of these, 4,754 had both chemical and ANA measurements.                            |
| Attrition/exclusion                           | Were outcome data completely reported without attrition or exclusion from analysis?                      | ++                          | All subjects included were assessed                                                                                                                                                         |
| Selective reporting                           | Were all measured outcomes reported?                                                                     | ++                          | All measures aimed for were performed.                                                                                                                                                      |
| <b>STUDIES ON EXPOSURE DURING DEVELOPMENT</b> |                                                                                                          |                             |                                                                                                                                                                                             |
| <b>Nagayama et al. (1998)</b>                 |                                                                                                          | <b>Risk of bias tier: 2</b> |                                                                                                                                                                                             |
| <b>Bias domain</b>                            | <b>Question</b>                                                                                          | <b>Score</b>                | <b>Judgement</b>                                                                                                                                                                            |
| Confounding                                   | <b>KQA</b> - Did the study design or analysis account for important confounding and modifying variables? | -                           | There is no information on possible confounding.                                                                                                                                            |
| Detection                                     | <b>KQB</b> - Can we be confident in the exposure characterisation?                                       | ++                          | The assessment of exposure is adequate done with good methodology in breast milk.                                                                                                           |
| Detection                                     | <b>KQC</b> - Can we be confident in the outcome assessment?                                              | +                           | The outcome (lymphocyte cell distribution) was done adequately, albeit that the plots of the analysis were not provided.                                                                    |

|                                       |                                                                                                          |                             |                                                                                                                                                                                                                                                                                                                                                                                                      |
|---------------------------------------|----------------------------------------------------------------------------------------------------------|-----------------------------|------------------------------------------------------------------------------------------------------------------------------------------------------------------------------------------------------------------------------------------------------------------------------------------------------------------------------------------------------------------------------------------------------|
| Selection                             | Did selection of study participants result in appropriate comparison groups?                             | -                           | There is no information on how the subjects were selected.                                                                                                                                                                                                                                                                                                                                           |
| Attrition/exclusion                   | Were outcome data completely reported without attrition or exclusion from analysis?                      | +                           | There is no indication that subjects were lost.                                                                                                                                                                                                                                                                                                                                                      |
| Selective reporting                   | Were all measured outcomes reported?                                                                     | ++                          | All measures aimed for were performed.                                                                                                                                                                                                                                                                                                                                                               |
| <b>Weisglas-Kuperus et al. (2000)</b> |                                                                                                          | <b>Risk of bias tier: 1</b> |                                                                                                                                                                                                                                                                                                                                                                                                      |
| <b>Bias domain</b>                    | <b>Question</b>                                                                                          | <b>Score</b>                | <b>Judgement</b>                                                                                                                                                                                                                                                                                                                                                                                     |
| Confounding                           | <b>KQA</b> - Did the study design or analysis account for important confounding and modifying variables? | ++                          | The data were corrected for sex, early feeding type (breast-fed or formula-fed), duration of breast-feeding, parity (firstborn or second born), maternal and parental occupation, tobacco smoking by one or both parents, family history of atopy in one or more and day care or nursery school attendance.                                                                                          |
| Detection                             | <b>KQB</b> - Can we be confident in the exposure characterisation?                                       | +                           | References to papers describing the methods for measurement of TEQ in mothers or cord blood were presented.                                                                                                                                                                                                                                                                                          |
| Detection                             | <b>KQC</b> - Can we be confident in the outcome assessment?                                              | ++                          | The immunological outcomes were assessed in a paediatric clinic and well described.                                                                                                                                                                                                                                                                                                                  |
| Selection                             | Did selection of study participants result in appropriate comparison groups?                             | +                           | There is information on the study subjects, 207 children were recruited. In 206 antibody responses to vaccination were measured. Complete health questionnaires were returned by 175 of the parents. Of these, 85 were tested immunologically. Breast fed and formula fed children were present in this cohort; breast fed children were under represented, but these conditions were corrected for. |
| Attrition/exclusion                   | Were outcome data completely reported without attrition or exclusion from analysis?                      | ++                          | All values on individuals tested were presented. A small number of individuals were excluded because they did not respond to vaccination.                                                                                                                                                                                                                                                            |
| Selective reporting                   | Were all measured outcomes reported?                                                                     | ++                          |                                                                                                                                                                                                                                                                                                                                                                                                      |
| <b>Van den Heuvel et al. (2002)</b>   |                                                                                                          | <b>Risk of bias tier: 1</b> |                                                                                                                                                                                                                                                                                                                                                                                                      |
| <b>Bias domain</b>                    | <b>Question</b>                                                                                          | <b>Score</b>                | <b>Judgement</b>                                                                                                                                                                                                                                                                                                                                                                                     |
| Confounding                           | <b>KQA</b> - Did the study design or analysis account for important confounding and modifying variables? | ++                          | There was an extensive description of potentially relevant confounders and correction.                                                                                                                                                                                                                                                                                                               |
| Detection                             | <b>KQB</b> - Can we be confident in the exposure characterisation?                                       | +                           | There is not much information on the exposure assessment, other than mentioning the CALUX assay. The institute however is well equipped to do this appropriately.                                                                                                                                                                                                                                    |
| Detection                             | <b>KQC</b> - Can we be confident in the outcome assessment?                                              | ++                          | Measures of outcome parameters were well described and in accord to common practice.                                                                                                                                                                                                                                                                                                                 |
| Selection                             | Did selection of study participants result in appropriate comparison groups?                             | ++                          | 355 subjects (adolescents, born 1980–1983) from two suburbs of Antwerp were invited to participate, 207 responded. 7 were excluded (just moved, unable to participate, illness). Samples were all taken in 1999.                                                                                                                                                                                     |
| Attrition/exclusion                   | Were outcome data completely reported without attrition or exclusion from analysis?                      | ++                          | Of all 200 recruited subjects samples were taken.                                                                                                                                                                                                                                                                                                                                                    |
| Selective reporting                   | Were all measured outcomes reported?                                                                     | ++                          | It seems that all the outcomes have been reported.                                                                                                                                                                                                                                                                                                                                                   |
| <b>Kaneko et al. (2006)</b>           |                                                                                                          | <b>Risk of bias tier: 1</b> |                                                                                                                                                                                                                                                                                                                                                                                                      |
| <b>Bias domain</b>                    | <b>Question</b>                                                                                          | <b>Score</b>                | <b>Judgement</b>                                                                                                                                                                                                                                                                                                                                                                                     |

|                                |                                                                                                          |                             |                                                                                                                                                                                                  |
|--------------------------------|----------------------------------------------------------------------------------------------------------|-----------------------------|--------------------------------------------------------------------------------------------------------------------------------------------------------------------------------------------------|
| Confounding                    | <b>KQA</b> - Did the study design or analysis account for important confounding and modifying variables? | +                           | Children were sampled at 1 year of age. There will be no occupational exposure, nor are main differences in body weight and diet to be expected.                                                 |
| Detection                      | <b>KQB</b> - Can we be confident in the exposure characterisation?                                       | ++                          | Exposure measure well described. For the methodology used to calculate the TEQs they referred to the WHO methodology.                                                                            |
| Detection                      | <b>KQC</b> - Can we be confident in the outcome assessment?                                              | ++                          | The outcome measures (lymphocyte distribution and immunoglobulin levels) were determined by well described methodologies.                                                                        |
| Selection                      | Did selection of study participants result in appropriate comparison groups?                             | ++                          | Recruited within a period of 5 years, residing in the same area for more than 5 years.                                                                                                           |
| Attrition/<br>exclusion        | Were outcome data completely reported without attrition or exclusion from analysis?                      | +                           | It is not clear why of 415 mothers only 281 breast fed children were sampled. Yet, all of these individuals recruited seem to be included in the analysis                                        |
| Selective reporting            | Were all measured outcomes reported?                                                                     | ++                          | It seems that all planned measures were reported.                                                                                                                                                |
| <b>Nagayama et al. (2007b)</b> |                                                                                                          | <b>Risk of bias tier: 1</b> |                                                                                                                                                                                                  |
| <b>Bias domain</b>             | <b>Question</b>                                                                                          | <b>Score</b>                | <b>Judgement</b>                                                                                                                                                                                 |
| Confounding                    | <b>KQA</b> - Did the study design or analysis account for important confounding and modifying variables? | +                           | Children were sampled at around 10 months of age. There will be no occupational exposure, nor are main differences in body weight and diet to be expected.                                       |
| Detection                      | <b>KQB</b> - Can we be confident in the exposure characterisation?                                       | ++                          | Methodology to measure the exposure was well described and adequate.                                                                                                                             |
| Detection                      | <b>KQC</b> - Can we be confident in the outcome assessment?                                              | ++                          | Methodology for assessing lymphocyte subpopulations was well described and adequate.                                                                                                             |
| Selection                      | Did selection of study participants result in appropriate comparison groups?                             | +                           | 108 mother children pairs were selected between June-August 1994 and 1995 living in Fukuoka and suburbs.                                                                                         |
| Attrition/<br>exclusion        | Were outcome data completely reported without attrition or exclusion from analysis?                      | -                           | Of 108 mother children pairs, blood samples were obtained from 101 infants, of these 92 were used to measure immune parameters. The difference is not big, but there is no explanation for this. |
| Selective reporting            | Were all measured outcomes reported?                                                                     | +                           | All outcomes planned seem to be reported; although it is not clear why only 92 of 101 samples were analysed for lymphocyte distribution.                                                         |
| <b>Leijs et al. (2009)</b>     |                                                                                                          | <b>Risk of bias tier: 2</b> |                                                                                                                                                                                                  |
| <b>Bias domain</b>             | <b>Question</b>                                                                                          | <b>Score</b>                | <b>Judgement</b>                                                                                                                                                                                 |
| Confounding                    | <b>KQA</b> - Did the study design or analysis account for important confounding and modifying variables? | -                           | There was no mention of any confounder or adjustment.                                                                                                                                            |
| Detection                      | <b>KQB</b> - Can we be confident in the exposure characterisation?                                       | +                           | There is no information in this paper on the methods for exposure assessment, but it is performed at a renowned laboratory.                                                                      |
| Detection                      | <b>KQC</b> - Can we be confident in the outcome assessment?                                              | +                           | There is little information on the assays to measure the outcomes. However, these are clinical measures performed at clinical chemical laboratories.                                             |
| Selection                      | Did selection of study participants result in appropriate comparison groups?                             | +                           | In the current paper no characteristics are given of the subjects, but there are references on the same cohort (Pluim et al., 1994; Ilsen et al., 1996; Ten Tuscher et al., 2003).               |
| Attrition/<br>exclusion        | Were outcome data completely reported without attrition or                                               | -                           | Of 60 subjects in the cohort, eventually only 30 remained to be tested. Whereas the reason for                                                                                                   |

|                                |                                                                                                          |                             |                                                                                                                                                                                                                                                                                                                                                                                                    |
|--------------------------------|----------------------------------------------------------------------------------------------------------|-----------------------------|----------------------------------------------------------------------------------------------------------------------------------------------------------------------------------------------------------------------------------------------------------------------------------------------------------------------------------------------------------------------------------------------------|
|                                | exclusion from analysis?                                                                                 |                             | the reduced number of subjects is given, the authors themselves mark this as a weakness of the study.                                                                                                                                                                                                                                                                                              |
| Selective reporting            | Were all measured outcomes reported?                                                                     | ++                          |                                                                                                                                                                                                                                                                                                                                                                                                    |
| <b>Miyashita et al. (2011)</b> |                                                                                                          | <b>Risk of bias tier: 1</b> |                                                                                                                                                                                                                                                                                                                                                                                                    |
| <b>Bias domain</b>             | <b>Question</b>                                                                                          | <b>Score</b>                | <b>Judgement</b>                                                                                                                                                                                                                                                                                                                                                                                   |
| Confounding                    | <b>KQA</b> - Did the study design or analysis account for important confounding and modifying variables? | +                           | Confounders (breast feeding, parental smoking, vaccination, Infant weight were taken into consideration. These characteristics were described in a paper by Kishi et al., in press).                                                                                                                                                                                                               |
| Detection                      | <b>KQB</b> - Can we be confident in the exposure characterisation?                                       | +                           | Exposure parameters were according accepted methods (referred to Tokada et al., 2003).                                                                                                                                                                                                                                                                                                             |
| Detection                      | <b>KQC</b> - Can we be confident in the outcome assessment?                                              | ++                          | Identification of infections and asthma followed doctors' diagnosis; for asthma in addition questionnaire based determination according ATS-DLD data were included.                                                                                                                                                                                                                                |
| Selection                      | Did selection of study participants result in appropriate comparison groups?                             | +                           | The subjects of this study were all recruited through medical examination between 2002 and 2005 at Sapporo Toho Hospital. Of 7,796 subjects contacted, 514 agreed. The subjects were well characterized. The participation rate was relatively low. However, it is not clear that this would have influenced assessment of exposure related effects. The study was performed in one hospital only. |
| Attrition/exclusion            | Were outcome data completely reported without attrition or exclusion from analysis?                      | ++                          | After delivery, 23 mother/children pairs were excluded (miscarriage, still birth, relocation, infant mortality). Of 491 remaining mothers, 390 responded and remained in the study.                                                                                                                                                                                                                |
| Selective reporting            | Were all measured outcomes reported?                                                                     | ++                          | All measures foreseen seem to have been performed.                                                                                                                                                                                                                                                                                                                                                 |
| <b>Stolevik et al. (2011)</b>  |                                                                                                          | <b>Risk of bias tier: 2</b> |                                                                                                                                                                                                                                                                                                                                                                                                    |
| <b>Bias domain</b>             | <b>Question</b>                                                                                          | <b>Score</b>                | <b>Judgement</b>                                                                                                                                                                                                                                                                                                                                                                                   |
| Confounding                    | <b>KQA</b> - Did the study design or analysis account for important confounding and modifying variables? | -                           | There is insufficient information on the study subjects and possible confounding has not been considered.                                                                                                                                                                                                                                                                                          |
| Detection                      | <b>KQB</b> - Can we be confident in the exposure characterisation?                                       | -                           | Exposure was assessed by food frequency questionnaires and no real exposure measurements were done.                                                                                                                                                                                                                                                                                                |
| Detection                      | <b>KQC</b> - Can we be confident in the outcome assessment?                                              | +                           | Wheeze was assessed with questionnaires. Discrimination between asthma and respiratory tract infections is not easy, but at the younger age wheeze is associated with respiratory tract infections. Exanthema subitum is easier concluded, although also other reasons for rashes may be evident.                                                                                                  |
| Selection                      | Did selection of study participants result in appropriate comparison groups?                             | -                           | There seems to be a selection bias as there was only a 38.5% participation rate in MoBa cohort.                                                                                                                                                                                                                                                                                                    |
| Attrition/exclusion            | Were outcome data completely reported without attrition or exclusion from analysis?                      | -                           | There is insufficient information provided about numbers of subjects lost to follow-up.                                                                                                                                                                                                                                                                                                            |
| Selective reporting            | Were all measured outcomes reported?                                                                     | ++                          | All measures aimed for were performed.                                                                                                                                                                                                                                                                                                                                                             |
| <b>Stolevik et al. (2013)</b>  |                                                                                                          | <b>Risk of bias tier: 2</b> |                                                                                                                                                                                                                                                                                                                                                                                                    |
| <b>Bias domain</b>             | <b>Question</b>                                                                                          | <b>Score</b>                | <b>Judgement</b>                                                                                                                                                                                                                                                                                                                                                                                   |
| Confounding                    | <b>KQA</b> - Did the study design or analysis account for important confounding and modifying variables? | -                           | There is insufficient information on the study subjects and possible confounding has not been considered.                                                                                                                                                                                                                                                                                          |

|                     |                                                                                     |    |                                                                                                                                                                                                                                                                 |
|---------------------|-------------------------------------------------------------------------------------|----|-----------------------------------------------------------------------------------------------------------------------------------------------------------------------------------------------------------------------------------------------------------------|
| Detection           | <b>KQB</b> - Can we be confident in the exposure characterisation?                  | -  | Exposure was assessed by food frequency questionnaires (FFQ) and no real exposure measurements were done.                                                                                                                                                       |
| Detection           | <b>KQC</b> - Can we be confident in the outcome assessment?                         | +  | Wheeze was assessed with questionnaires. Discrimination between asthma and respiratory tract infections is not easy, but at the younger age wheeze is associated with respiratory tract infections. Antibody titres were assessed using accepted methodologies. |
| Selection           | Did selection of study participants result in appropriate comparison groups?        | -  | There seems to be a selection bias as there was only a 38.5% participation rate in MoBa cohort.                                                                                                                                                                 |
| Attrition/exclusion | Were outcome data completely reported without attrition or exclusion from analysis? | -  | There is insufficient information provided about numbers of subjects lost to follow-up.                                                                                                                                                                         |
| Selective reporting | Were all measured outcomes reported?                                                | ++ | All measures aimed for were performed.                                                                                                                                                                                                                          |

### A.9.9. Studies on effects on the nervous system

**Table 84.** Risk of bias appraisal of studies on effects on the nervous system (scores corresponding to one appraisal). Note: appraisal of individual studies focused only on risk of bias; additional quality aspects were considered when evaluating the overall confidence in the body of evidence (see Section 2.2.1.2 of the opinion).

| <b>NEURODEVELOPMENT IN CHILDREN</b> |                                                                                                          |                             |                                                          |
|-------------------------------------|----------------------------------------------------------------------------------------------------------|-----------------------------|----------------------------------------------------------|
| <b>Lanting et al. (1998)</b>        |                                                                                                          | <b>Risk of bias tier: 1</b> |                                                          |
| <b>Bias domain</b>                  | <b>Question</b>                                                                                          | <b>Score</b>                | <b>Judgement</b>                                         |
| Confounding                         | <b>KQA</b> - Did the study design or analysis account for important confounding and modifying variables? | +                           |                                                          |
| Detection                           | <b>KQB</b> - Can we be confident in the exposure characterisation?                                       | +                           | Unclear TEF scheme used.                                 |
| Detection                           | <b>KQC</b> - Can we be confident in the outcome assessment?                                              | +                           | Assessors were blinded to exposure and feeding practice. |
| Selection                           | Did selection of study participants result in appropriate comparison groups?                             | +                           |                                                          |
| Attrition/exclusion                 | Were outcome data completely reported without attrition or exclusion from analysis?                      | ++                          | 94% of the children assessed at 42 months.               |
| Selective reporting                 | Were all measured outcomes reported?                                                                     | ++                          |                                                          |
| <b>Patandin et al. (1999)</b>       |                                                                                                          | <b>Risk of bias tier: 1</b> |                                                          |
| <b>Bias domain</b>                  | <b>Question</b>                                                                                          | <b>Score</b>                | <b>Judgement</b>                                         |
| Confounding                         | <b>KQA</b> - Did the study design or analysis account for important confounding and modifying variables? | +                           |                                                          |
| Detection                           | <b>KQB</b> - Can we be confident in the exposure characterisation?                                       | +                           |                                                          |
| Detection                           | <b>KQC</b> - Can we be confident in the outcome assessment?                                              | +                           |                                                          |
| Selection                           | Did selection of study participants result in appropriate comparison groups?                             | +                           |                                                          |
| Attrition/                          | Were outcome data completely                                                                             | +                           |                                                          |

|                                  |                                                                                                          |                             |                                                                                                                 |
|----------------------------------|----------------------------------------------------------------------------------------------------------|-----------------------------|-----------------------------------------------------------------------------------------------------------------|
| exclusion                        | reported without attrition or exclusion from analysis?                                                   |                             |                                                                                                                 |
| Selective reporting              | Were all measured outcomes reported?                                                                     | +                           |                                                                                                                 |
| <b>Vreugdenhil et al. (2002)</b> |                                                                                                          | <b>Risk of bias tier: 1</b> |                                                                                                                 |
| <b>Bias domain</b>               | <b>Question</b>                                                                                          | <b>Score</b>                | <b>Judgement</b>                                                                                                |
| Confounding                      | <b>KQA</b> - Did the study design or analysis account for important confounding and modifying variables? | +                           | Several confounders considered, including HOME score.                                                           |
| Detection                        | <b>KQB</b> - Can we be confident in the exposure characterisation?                                       | +                           |                                                                                                                 |
| Detection                        | <b>KQC</b> - Can we be confident in the outcome assessment?                                              | +                           | Parent reported. Validated questionnaire.                                                                       |
| Selection                        | Did selection of study participants result in appropriate comparison groups?                             | ++                          |                                                                                                                 |
| Attrition/exclusion              | Were outcome data completely reported without attrition or exclusion from analysis?                      | ++                          |                                                                                                                 |
| Selective reporting              | Were all measured outcomes reported?                                                                     | ++                          |                                                                                                                 |
| <b>Nakajima et al. (2006)</b>    |                                                                                                          | <b>Risk of bias tier: 1</b> |                                                                                                                 |
| <b>Bias domain</b>               | <b>Question</b>                                                                                          | <b>Score</b>                | <b>Judgement</b>                                                                                                |
| Confounding                      | <b>KQA</b> - Did the study design or analysis account for important confounding and modifying variables? | +                           | Adjusted for important confounders, co-exposure not known                                                       |
| Detection                        | <b>KQB</b> - Can we be confident in the exposure characterisation?                                       | ++                          |                                                                                                                 |
| Detection                        | <b>KQC</b> - Can we be confident in the outcome assessment?                                              | +                           | Bayley scale of infant Development not standardized in Japan, but justified that outcome is still interpretable |
| Selection                        | Did selection of study participants result in appropriate comparison groups?                             | ++                          |                                                                                                                 |
| Attrition/exclusion              | Were outcome data completely reported without attrition or exclusion from analysis?                      | ++                          | Fulfilling outcome test and providing samples was part of inclusion criteria, so no loss                        |
| Selective reporting              | Were all measured outcomes reported?                                                                     | ++                          |                                                                                                                 |
| <b>Wilhelm et al. (2008)</b>     |                                                                                                          | <b>Risk of bias tier: 1</b> |                                                                                                                 |
| <b>Bias domain</b>               | <b>Question</b>                                                                                          | <b>Score</b>                | <b>Judgement</b>                                                                                                |
| Confounding                      | <b>KQA</b> - Did the study design or analysis account for important confounding and modifying variables? | +                           | Adjusted for several confounders, method for selection not given.                                               |
| Detection                        | <b>KQB</b> - Can we be confident in the exposure characterisation?                                       | +                           |                                                                                                                 |
| Detection                        | <b>KQC</b> - Can we be confident in the outcome assessment?                                              | +                           | Blinding of examiner was not described. Examiner effect observed at two weeks, adjusted for.                    |
| Selection                        | Did selection of study participants result in appropriate comparison groups?                             | ++                          | Prospective cohort.                                                                                             |
| Attrition/exclusion              | Were outcome data completely reported without attrition or exclusion from analysis?                      | +                           |                                                                                                                 |
| Selective reporting              | Were all measured outcomes reported?                                                                     | +                           |                                                                                                                 |
| <b>Halldorson et al. (2009)</b>  |                                                                                                          | <b>Risk of bias tier: 2</b> |                                                                                                                 |



| Bias domain                  | Question                                                                                                 | Score                       | Judgement                                                                                                                                     |
|------------------------------|----------------------------------------------------------------------------------------------------------|-----------------------------|-----------------------------------------------------------------------------------------------------------------------------------------------|
| Confounding                  | <b>KQA</b> - Did the study design or analysis account for important confounding and modifying variables? | +                           | Socioeconomic status not adjusted for                                                                                                         |
| Detection                    | <b>KQB</b> - Can we be confident in the exposure characterisation?                                       | -                           | CALUX may be confounded by PAH, since increased with meat consumption and decreased with fish (opposite of expected).                         |
| Detection                    | <b>KQC</b> - Can we be confident in the outcome assessment?                                              | +                           | Although self-reported.                                                                                                                       |
| Selection                    | Did selection of study participants result in appropriate comparison groups?                             | +                           |                                                                                                                                               |
| Attrition/exclusion          | Were outcome data completely reported without attrition or exclusion from analysis?                      | ++                          |                                                                                                                                               |
| Selective reporting          | Were all measured outcomes reported?                                                                     | ++                          |                                                                                                                                               |
| <b>Sioen et al. (2013)</b>   |                                                                                                          | <b>Risk of bias tier: 1</b> |                                                                                                                                               |
| Bias domain                  | Question                                                                                                 | Score                       | Judgement                                                                                                                                     |
| Confounding                  | <b>KQA</b> - Did the study design or analysis account for important confounding and modifying variables? | +                           |                                                                                                                                               |
| Detection                    | <b>KQB</b> - Can we be confident in the exposure characterisation?                                       | +                           | Low volume and fat% in cord blood lead to high LOD.                                                                                           |
| Detection                    | <b>KQC</b> - Can we be confident in the outcome assessment?                                              | +                           | Parent reported, probably blinded.                                                                                                            |
| Selection                    | Did selection of study participants result in appropriate comparison groups?                             | +                           | Some differences between participants (maternal age and education) and non-participants adjusted for.                                         |
| Attrition/exclusion          | Were outcome data completely reported without attrition or exclusion from analysis?                      | +                           | Adjusted for as described above.                                                                                                              |
| Selective reporting          | Were all measured outcomes reported?                                                                     | ++                          |                                                                                                                                               |
| <b>Winneke et al. (2014)</b> |                                                                                                          | <b>Risk of bias tier: 1</b> |                                                                                                                                               |
| Bias domain                  | Question                                                                                                 | Score                       | Judgement                                                                                                                                     |
| Confounding                  | <b>KQA</b> - Did the study design or analysis account for important confounding and modifying variables? | +                           | Well addressed, but insufficient information about co-exposure as in all cohorts. High education overrepresented, may affect generalizability |
| Detection                    | <b>KQB</b> - Can we be confident in the exposure characterisation?                                       | ++                          | both blood and milk data, with high correlation                                                                                               |
| Detection                    | <b>KQC</b> - Can we be confident in the outcome assessment?                                              | +                           | Parent - reported. Parents knew exposure but could not interpret it since no Reference values for blood or milk exist.                        |
| Selection                    | Did selection of study participants result in appropriate comparison groups?                             | ++                          | Recruited in similar way, all exposed to some extent                                                                                          |
| Attrition/exclusion          | Were outcome data completely reported without attrition or exclusion from analysis?                      | ++                          |                                                                                                                                               |
| Selective reporting          | Were all measured outcomes reported?                                                                     | ++                          | All reported                                                                                                                                  |
| <b>Nowack et al. (2015)</b>  |                                                                                                          | <b>Risk of bias tier: 1</b> |                                                                                                                                               |
| Bias domain                  | Question                                                                                                 | Score                       | Judgement                                                                                                                                     |
| Confounding                  | <b>KQA</b> - Did the study design or analysis account for important confounding and modifying variables? | +                           | Important confounders addressed                                                                                                               |
| Detection                    | <b>KQB</b> - Can we be confident in the                                                                  | ++                          | Well documented in previous papers                                                                                                            |

|                                 |                                                                                                          |                             |                                                                                                                                                                                                                                                                                                      |
|---------------------------------|----------------------------------------------------------------------------------------------------------|-----------------------------|------------------------------------------------------------------------------------------------------------------------------------------------------------------------------------------------------------------------------------------------------------------------------------------------------|
| Detection                       | exposure characterisation?<br><b>KQC</b> - Can we be confident in the outcome assessment?                | +                           | SRS good reliability and validity<br>EQ-SQ not validated in children                                                                                                                                                                                                                                 |
| Selection                       | Did selection of study participants result in appropriate comparison groups?                             | -                           | Insufficient information about invitations at follow up.                                                                                                                                                                                                                                             |
| Attrition/<br>exclusion         | Were outcome data completely reported without attrition or exclusion from analysis?                      | +                           | Significant differences between participants and non-participants may influence generalizability of exposure-outcome associations.                                                                                                                                                                   |
| Selective reporting             | Were all measured outcomes reported?                                                                     | +                           |                                                                                                                                                                                                                                                                                                      |
| <b>Neugebauer et al. (2015)</b> |                                                                                                          | <b>Risk of bias tier: 2</b> |                                                                                                                                                                                                                                                                                                      |
| <b>Bias domain</b>              | <b>Question</b>                                                                                          | <b>Score</b>                | <b>Judgement</b>                                                                                                                                                                                                                                                                                     |
| Confounding                     | <b>KQA</b> - Did the study design or analysis account for important confounding and modifying variables? | +                           | Adjusted for a number of confounders/covariates, including lead                                                                                                                                                                                                                                      |
| Detection                       | <b>KQB</b> - Can we be confident in the exposure characterisation?                                       | ++                          | Levels in maternal blood and milk                                                                                                                                                                                                                                                                    |
| Detection                       | <b>KQC</b> - Can we be confident in the outcome assessment?                                              | -                           | KITAP is not validated. FBB-ADHS is validated but parent-reported and not blinded to exposure                                                                                                                                                                                                        |
| Selection                       | Did selection of study participants result in appropriate comparison groups?                             | +                           | Predictive cohort, 50% loss to follow up. Exposure similar in participants and non-participants                                                                                                                                                                                                      |
| Attrition/<br>exclusion         | Were outcome data completely reported without attrition or exclusion from analysis?                      | ++                          | All outcome data reported, but low participation rate at follow up (50%)                                                                                                                                                                                                                             |
| Selective reporting             | Were all measured outcomes reported?                                                                     | ++                          | All outcomes reported                                                                                                                                                                                                                                                                                |
| <b>Caspersen et al. (2016a)</b> |                                                                                                          | <b>Risk of bias tier: 2</b> |                                                                                                                                                                                                                                                                                                      |
| <b>Bias domain</b>              | <b>Question</b>                                                                                          | <b>Score</b>                | <b>Judgement</b>                                                                                                                                                                                                                                                                                     |
| Confounding                     | <b>KQA</b> - Did the study design or analysis account for important confounding and modifying variables? | ++                          | All the relevant confounders are counted for (age, BMI, breast feeding, smoking and others). Occupational exposures are not relevant here.                                                                                                                                                           |
| Detection                       | <b>KQB</b> - Can we be confident in the exposure characterisation?                                       | -                           | Dietary intake: indirect measure compared to blood levels.                                                                                                                                                                                                                                           |
| Detection                       | <b>KQC</b> - Can we be confident in the outcome assessment?                                              | +                           | The outcome is self-reported and parental report of their children's own progress is always subject to some bias.                                                                                                                                                                                    |
| Selection                       | Did selection of study participants result in appropriate comparison groups?                             | ++                          | This is a cohort study and subjects are recruited from the same target population (and they should be blinded towards their own exposure).                                                                                                                                                           |
| Attrition/<br>exclusion         | Were outcome data completely reported without attrition or exclusion from analysis?                      | ++                          | Loss of subjects was accurately described and I see no clear cause for concern as 85% of those eligible ended up in the final analyses.                                                                                                                                                              |
| Selective reporting             | Were all measured outcomes reported?                                                                     | ++                          | Reporting was detailed and no important information was lacking.                                                                                                                                                                                                                                     |
| <b>Caspersen et al. (2016b)</b> |                                                                                                          | <b>Risk of bias tier: 2</b> |                                                                                                                                                                                                                                                                                                      |
| <b>Bias domain</b>              | <b>Question</b>                                                                                          | <b>Score</b>                | <b>Judgement</b>                                                                                                                                                                                                                                                                                     |
| Confounding                     | <b>KQA</b> - Did the study design or analysis account for important confounding and modifying variables? | ++                          | Appropriate covariates were included in their analyses and use of statistical models was appropriate. The only important covariate not measured was maternal or parental IQ but this is rarely measured and it is unlikely that maternal/parental IQ would be related to maternal intake of dioxins. |
| Detection                       | <b>KQB</b> - Can we be confident in the                                                                  | -                           | Dietary intake: indirect measure compared to                                                                                                                                                                                                                                                         |



|                               |                                                                                                          |                             |                                                                                                                                                                                                                                                                                                                                                      |
|-------------------------------|----------------------------------------------------------------------------------------------------------|-----------------------------|------------------------------------------------------------------------------------------------------------------------------------------------------------------------------------------------------------------------------------------------------------------------------------------------------------------------------------------------------|
| Detection                     | exposure characterisation?<br><b>KQC</b> - Can we be confident in the outcome assessment?                | ++                          | blood levels<br>Clinical assessment by a trained health professional                                                                                                                                                                                                                                                                                 |
| Selection                     | Did selection of study participants result in appropriate comparison groups?                             | +                           | The comparison group is randomly selected and children with ADHD symptoms are selected based on initial screening. When invited to participate both groups had modest participation rate. Still the design in appropriate.                                                                                                                           |
| Attrition/<br>exclusion       | Were outcome data completely reported without attrition or exclusion from analysis?                      | +                           | The outcome data was completely reported. There was a modest response rate among potential ADHD candidates that were invited to participate (37.5%) which on its own is not so problematic as this is an association study but not a case controls study. Exclusion of subjects from the study was minor and should not have influenced the results. |
| Selective reporting           | Were all measured outcomes reported?                                                                     | ++                          | No indications on selective reporting.                                                                                                                                                                                                                                                                                                               |
| <b>Nakajima et al. (2017)</b> |                                                                                                          | <b>Risk of bias tier: 2</b> |                                                                                                                                                                                                                                                                                                                                                      |
| <b>Bias domain</b>            | <b>Question</b>                                                                                          | <b>Score</b>                | <b>Judgement</b>                                                                                                                                                                                                                                                                                                                                     |
| Confounding                   | <b>KQA</b> - Did the study design or analysis account for important confounding and modifying variables? | -                           | Breast feeding duration was not taken into consideration, possible confounding by postnatal exposure. Maternal intellectual performance not considered at 6 months.                                                                                                                                                                                  |
| Detection                     | <b>KQB</b> - Can we be confident in the exposure characterisation?                                       | +                           |                                                                                                                                                                                                                                                                                                                                                      |
| Detection                     | <b>KQC</b> - Can we be confident in the outcome assessment?                                              | +                           |                                                                                                                                                                                                                                                                                                                                                      |
| Selection                     | Did selection of study participants result in appropriate comparison groups?                             | +                           |                                                                                                                                                                                                                                                                                                                                                      |
| Attrition/<br>exclusion       | Were outcome data completely reported without attrition or exclusion from analysis?                      | +                           |                                                                                                                                                                                                                                                                                                                                                      |
| Selective reporting           | Were all measured outcomes reported?                                                                     | +                           |                                                                                                                                                                                                                                                                                                                                                      |
| <b>Ikeno et al. (2018)</b>    |                                                                                                          | <b>Risk of bias tier: 1</b> |                                                                                                                                                                                                                                                                                                                                                      |
| <b>Bias domain</b>            | <b>Question</b>                                                                                          | <b>Score</b>                | <b>Judgement</b>                                                                                                                                                                                                                                                                                                                                     |
| Confounding                   | <b>KQA</b> - Did the study design or analysis account for important confounding and modifying variables? | +                           | OK since they assess prenatal exposure in relation to endpoint. However, postnatal exposure (and effects) may be relevant and exposure from breastfeeding is not taken into consideration.                                                                                                                                                           |
| Detection                     | <b>KQB</b> - Can we be confident in the exposure characterisation?                                       | +                           |                                                                                                                                                                                                                                                                                                                                                      |
| Detection                     | <b>KQC</b> - Can we be confident in the outcome assessment?                                              | +                           |                                                                                                                                                                                                                                                                                                                                                      |
| Selection                     | Did selection of study participants result in appropriate comparison groups?                             | +                           |                                                                                                                                                                                                                                                                                                                                                      |
| Attrition/<br>exclusion       | Were outcome data completely reported without attrition or exclusion from analysis?                      | +                           |                                                                                                                                                                                                                                                                                                                                                      |
| Selective reporting           | Were all measured outcomes reported?                                                                     | +                           |                                                                                                                                                                                                                                                                                                                                                      |
| <b>Hui et al. (2016)</b>      |                                                                                                          | <b>Risk of bias tier: 1</b> |                                                                                                                                                                                                                                                                                                                                                      |
| <b>Bias domain</b>            | <b>Question</b>                                                                                          | <b>Score</b>                | <b>Judgement</b>                                                                                                                                                                                                                                                                                                                                     |
| Confounding                   | <b>KQA</b> - Did the study design or analysis account for important                                      | +                           |                                                                                                                                                                                                                                                                                                                                                      |

|                                |                                                                                                          |                             |                                                                                                              |
|--------------------------------|----------------------------------------------------------------------------------------------------------|-----------------------------|--------------------------------------------------------------------------------------------------------------|
|                                | confounding and modifying variables?                                                                     |                             |                                                                                                              |
| Detection                      | <b>KQB</b> - Can we be confident in the exposure characterisation?                                       | +                           | Assessed in relation to maternal BEQ, but postnatal exposure may be of importance for the outcome.           |
| Detection                      | <b>KQC</b> - Can we be confident in the outcome assessment?                                              | +                           |                                                                                                              |
| Selection                      | Did selection of study participants result in appropriate comparison groups?                             | +                           |                                                                                                              |
| Attrition/exclusion            | Were outcome data completely reported without attrition or exclusion from analysis?                      | +                           |                                                                                                              |
| Selective reporting            | Were all measured outcomes reported?                                                                     | +                           |                                                                                                              |
| <b>OCCUPATIONAL STUDIES</b>    |                                                                                                          |                             |                                                                                                              |
| <b>Michalek et al. (2001b)</b> |                                                                                                          | <b>Risk of bias tier: 2</b> |                                                                                                              |
| <b>Bias domain</b>             | <b>Question</b>                                                                                          | <b>Score</b>                | <b>Judgement</b>                                                                                             |
| Confounding                    | <b>KQA</b> - Did the study design or analysis account for important confounding and modifying variables? | +                           | Known confounders adjusted for                                                                               |
| Detection                      | <b>KQB</b> - Can we be confident in the exposure characterisation?                                       | -                           | Back calculated from samples in 1987-1997, long time after exposure (1962-1971).                             |
| Detection                      | <b>KQC</b> - Can we be confident in the outcome assessment?                                              | +                           | Neuropathy in 1997 could not be confirmed by nerve measurements of nerve conduction (only performed in 1982) |
| Selection                      | Did selection of study participants result in appropriate comparison groups?                             | +                           | Matched Reference population, but recruited at a later stage                                                 |
| Attrition/exclusion            | Were outcome data completely reported without attrition or exclusion from analysis?                      | ++                          | All reported                                                                                                 |
| Selective reporting            | Were all measured outcomes reported?                                                                     | ++                          | All reported                                                                                                 |
| <b>Barret et al. (2001)</b>    |                                                                                                          | <b>Risk of bias tier: 2</b> |                                                                                                              |
| <b>Bias domain</b>             | <b>Question</b>                                                                                          | <b>Score</b>                | <b>Judgement</b>                                                                                             |
| Confounding                    | <b>KQA</b> - Did the study design or analysis account for important confounding and modifying variables? | +                           |                                                                                                              |
| Detection                      | <b>KQB</b> - Can we be confident in the exposure characterisation?                                       | -                           | High uncertainty in the back-calculation of exposure.                                                        |
| Detection                      | <b>KQC</b> - Can we be confident in the outcome assessment?                                              | +                           |                                                                                                              |
| Selection                      | Did selection of study participants result in appropriate comparison groups?                             | +                           |                                                                                                              |
| Attrition/exclusion            | Were outcome data completely reported without attrition or exclusion from analysis?                      | +                           |                                                                                                              |
| Selective reporting            | Were all measured outcomes reported?                                                                     | ++                          |                                                                                                              |
| <b>Pelclova et al. (2001)</b>  |                                                                                                          | <b>Risk of bias tier: 2</b> |                                                                                                              |
| <b>Bias domain</b>             | <b>Question</b>                                                                                          | <b>Score</b>                | <b>Judgement</b>                                                                                             |
| Confounding                    | <b>KQA</b> - Did the study design or analysis account for important confounding and modifying variables? | -                           | Confounders could not be assessed with such low n.                                                           |
| Detection                      | <b>KQB</b> - Can we be confident in the exposure characterisation?                                       | +                           |                                                                                                              |
| Detection                      | <b>KQC</b> - Can we be confident in the                                                                  | +                           | Blinding not described, but known that all                                                                   |

|                               |                                                                                                          |                             |                                                                                                              |
|-------------------------------|----------------------------------------------------------------------------------------------------------|-----------------------------|--------------------------------------------------------------------------------------------------------------|
|                               | outcome assessment?                                                                                      |                             | were highly exposed workers, would probably not lead to bias.                                                |
| Selection                     | Did selection of study participants result in appropriate comparison groups?                             | -                           | Originally 80 intoxicated workers. Only 12 participated at follow up, no information about non-participants. |
| Attrition/exclusion           | Were outcome data completely reported without attrition or exclusion from analysis?                      | -                           | Insufficient information                                                                                     |
| Selective reporting           | Were all measured outcomes reported?                                                                     | -                           | Only main variables reported.                                                                                |
| <b>Pelclova et al. (2002)</b> |                                                                                                          | <b>Risk of bias tier: 2</b> |                                                                                                              |
| <b>Bias domain</b>            | <b>Question</b>                                                                                          | <b>Score</b>                | <b>Judgement</b>                                                                                             |
| Confounding                   | <b>KQA</b> - Did the study design or analysis account for important confounding and modifying variables? | -                           | Too low N to account for confounders                                                                         |
| Detection                     | <b>KQB</b> - Can we be confident in the exposure characterisation?                                       | +                           |                                                                                                              |
| Detection                     | <b>KQC</b> - Can we be confident in the outcome assessment?                                              | +                           |                                                                                                              |
| Selection                     | Did selection of study participants result in appropriate comparison groups?                             | -                           | Originally 80 intoxicated workers. Only 11 participated at follow up, no information about non-participants. |
| Attrition/exclusion           | Were outcome data completely reported without attrition or exclusion from analysis?                      | -                           | Few participants                                                                                             |
| Selective reporting           | Were all measured outcomes reported?                                                                     | +                           | More variables reported also from 1996 examination.                                                          |
| <b>Michalek et al. (2003)</b> |                                                                                                          | <b>Risk of bias tier: 2</b> |                                                                                                              |
| <b>Bias domain</b>            | <b>Question</b>                                                                                          | <b>Score</b>                | <b>Judgement</b>                                                                                             |
| Confounding                   | <b>KQA</b> - Did the study design or analysis account for important confounding and modifying variables? | +                           |                                                                                                              |
| Detection                     | <b>KQB</b> - Can we be confident in the exposure characterisation?                                       | -                           | Back calculated many years back in time of high exposure using linear model.                                 |
| Detection                     | <b>KQC</b> - Can we be confident in the outcome assessment?                                              | -                           | Self-reported. Aware of own exposure. Anxiety to TCDD exposure from Agent Orange.                            |
| Selection                     | Did selection of study participants result in appropriate comparison groups?                             | +                           | Matched comparisons                                                                                          |
| Attrition/exclusion           | Were outcome data completely reported without attrition or exclusion from analysis?                      | +                           |                                                                                                              |
| Selective reporting           | Were all measured outcomes reported?                                                                     | +                           |                                                                                                              |
| <b>Urban et al. (2007)</b>    |                                                                                                          | <b>Risk of bias tier: 2</b> |                                                                                                              |
| <b>Bias domain</b>            | <b>Question</b>                                                                                          | <b>Score</b>                | <b>Judgement</b>                                                                                             |
| Confounding                   | <b>KQA</b> - Did the study design or analysis account for important confounding and modifying variables? | -                           | Too low number of participants to adjust for confounders                                                     |
| Detection                     | <b>KQB</b> - Can we be confident in the exposure characterisation?                                       | +                           |                                                                                                              |
| Detection                     | <b>KQC</b> - Can we be confident in the outcome assessment?                                              | +                           |                                                                                                              |
| Selection                     | Did selection of study participants result in appropriate comparison groups?                             | -                           | Basis for selection of participants unclear                                                                  |
| Attrition/exclusion           | Were outcome data completely reported without attrition or                                               | -                           | Reasons for loss to follow up not described                                                                  |

|                               |                                                                                                          |                             |                                                                                |
|-------------------------------|----------------------------------------------------------------------------------------------------------|-----------------------------|--------------------------------------------------------------------------------|
|                               | exclusion from analysis?                                                                                 |                             |                                                                                |
| Selective reporting           | Were all measured outcomes reported?                                                                     | +                           |                                                                                |
| <b>Pelclova et al. (2009)</b> |                                                                                                          | <b>Risk of bias tier: 2</b> |                                                                                |
| <b>Bias domain</b>            | <b>Question</b>                                                                                          | <b>Score</b>                | <b>Judgement</b>                                                               |
| Confounding                   | <b>KQA</b> - Did the study design or analysis account for important confounding and modifying variables? | -                           | Too low N to account for confounders                                           |
| Detection                     | <b>KQB</b> - Can we be confident in the exposure characterisation?                                       | +                           | Analysis not described, refers to levels in 2008.                              |
| Detection                     | <b>KQC</b> - Can we be confident in the outcome assessment?                                              | +                           |                                                                                |
| Selection                     | Did selection of study participants result in appropriate comparison groups?                             | -                           | Low participation rate (8-11 out of 80), no information about non-participants |
| Attrition/exclusion           | Were outcome data completely reported without attrition or exclusion from analysis?                      | -                           | Reason for loss to follow up not described                                     |
| Selective reporting           | Were all measured outcomes reported?                                                                     | +                           |                                                                                |

### A.9.10. Studies on effects on teeth and bone

**Table 85.** Risk of bias appraisal of studies on effects on teeth and bone (scores corresponding to one appraisal). Note: appraisal of individual studies focused only on risk of bias; additional quality aspects were considered when evaluating the overall confidence in the body of evidence (see Section 2.2.1.2 of the opinion).

|                                |                                                                                                          |                             |                                                                                                                                             |
|--------------------------------|----------------------------------------------------------------------------------------------------------|-----------------------------|---------------------------------------------------------------------------------------------------------------------------------------------|
| <b>DEVELOPMENT OF TEETH</b>    |                                                                                                          |                             |                                                                                                                                             |
| <b>Alaluusua et al. (2002)</b> |                                                                                                          | <b>Risk of bias tier: 1</b> |                                                                                                                                             |
| <b>Bias domain</b>             | <b>Question</b>                                                                                          | <b>Score</b>                | <b>Judgement</b>                                                                                                                            |
| Confounding                    | <b>KQA</b> - Did the study design or analysis account for important confounding and modifying variables? | +                           |                                                                                                                                             |
| Detection                      | <b>KQB</b> - Can we be confident in the exposure characterisation?                                       | +                           |                                                                                                                                             |
| Detection                      | <b>KQC</b> - Can we be confident in the outcome assessment?                                              | ++                          |                                                                                                                                             |
| Selection                      | Did selection of study participants result in appropriate comparison groups?                             | ++                          |                                                                                                                                             |
| Attrition/exclusion            | Were outcome data completely reported without attrition or exclusion from analysis?                      | ++                          |                                                                                                                                             |
| Selective reporting            | Were all measured outcomes reported?                                                                     | ++                          |                                                                                                                                             |
| <b>Wang et al. (2003)</b>      |                                                                                                          | <b>Risk of bias tier: 1</b> |                                                                                                                                             |
| <b>Bias domain</b>             | <b>Question</b>                                                                                          | <b>Score</b>                | <b>Judgement</b>                                                                                                                            |
| Confounding                    | <b>KQA</b> - Did the study design or analysis account for important confounding and modifying variables? | +                           |                                                                                                                                             |
| Detection                      | <b>KQB</b> - Can we be confident in the exposure characterisation?                                       | +                           |                                                                                                                                             |
| Detection                      | <b>KQC</b> - Can we be confident in the outcome assessment?                                              | +                           | Definitely low risk related to dentist evaluations. But dental developmental history is parent reported, may be associated with recall bias |

|                                |                                                                                                          |                             |                                                                                                                                                                                                          |
|--------------------------------|----------------------------------------------------------------------------------------------------------|-----------------------------|----------------------------------------------------------------------------------------------------------------------------------------------------------------------------------------------------------|
| Selection                      | Did selection of study participants result in appropriate comparison groups?                             | ++                          | Matched controls                                                                                                                                                                                         |
| Attrition/exclusion            | Were outcome data completely reported without attrition or exclusion from analysis?                      | ++                          |                                                                                                                                                                                                          |
| Selective reporting            | Were all measured outcomes reported?                                                                     | ++                          |                                                                                                                                                                                                          |
| <b>Alaluusua et al. (2004)</b> |                                                                                                          | <b>Risk of bias tier: 1</b> |                                                                                                                                                                                                          |
| <b>Bias domain</b>             | <b>Question</b>                                                                                          | <b>Score</b>                | <b>Judgement</b>                                                                                                                                                                                         |
| Confounding                    | <b>KQA</b> - Did the study design or analysis account for important confounding and modifying variables? | +                           | Age, smoking, sex and education similar between ABR and non-ABR participants. Higher education independent explanator for lower risk of enamel defects, no interaction between TCDD and education level. |
| Detection                      | <b>KQB</b> - Can we be confident in the exposure characterisation?                                       | +                           | TCDD measured shortly after the accident, but no information on non-ABR participants except two pools from children from the same area, not participating in the non-ABR Group.                          |
| Detection                      | <b>KQC</b> - Can we be confident in the outcome assessment?                                              | ++                          | All investigated by the same dentist, high intra-examiner reproducibility, examiner blinded to exposures and participants. unaware of the research hypotheses                                            |
| Selection                      | Did selection of study participants result in appropriate comparison groups?                             | +                           | Participation rate in ABR 74%, non-ABR 58%                                                                                                                                                               |
| Attrition/exclusion            | Were outcome data completely reported without attrition or exclusion from analysis?                      | +                           |                                                                                                                                                                                                          |
| Selective reporting            | Were all measured outcomes reported?                                                                     | ++                          | All reported                                                                                                                                                                                             |
| <b>BONE</b>                    |                                                                                                          | <b>Risk of bias tier: 1</b> |                                                                                                                                                                                                          |
| <b>Eskenazi et al. (2014)</b>  |                                                                                                          | <b>Risk of bias tier: 1</b> |                                                                                                                                                                                                          |
| <b>Bias domain</b>             | <b>Question</b>                                                                                          | <b>Score</b>                | <b>Judgement</b>                                                                                                                                                                                         |
| Confounding                    | <b>KQA</b> - Did the study design or analysis account for important confounding and modifying variables? | ++                          |                                                                                                                                                                                                          |
| Detection                      | <b>KQB</b> - Can we be confident in the exposure characterisation?                                       | +                           | Variation in background exposure to other PCDD/Fs- and DL-PCBs is unknown.                                                                                                                               |
| Detection                      | <b>KQC</b> - Can we be confident in the outcome assessment?                                              | ++                          |                                                                                                                                                                                                          |
| Selection                      | Did selection of study participants result in appropriate comparison groups?                             | ++                          | High participation rate (82%).                                                                                                                                                                           |
| Attrition/exclusion            | Were outcome data completely reported without attrition or exclusion from analysis?                      | ++                          |                                                                                                                                                                                                          |
| Selective reporting            | Were all measured outcomes reported?                                                                     | ++                          |                                                                                                                                                                                                          |
| <b>Fukushi et al. (2016)</b>   |                                                                                                          | <b>Risk of bias tier: 2</b> |                                                                                                                                                                                                          |
| <b>Bias domain</b>             | <b>Question</b>                                                                                          | <b>Score</b>                | <b>Judgement</b>                                                                                                                                                                                         |
| Confounding                    | <b>KQA</b> - Did the study design or analysis account for important confounding and modifying variables? | -                           | Limited information, smoking not known.                                                                                                                                                                  |
| Detection                      | <b>KQB</b> - Can we be confident in the exposure characterisation?                                       | -                           | Sampled 36-39 y after the accident                                                                                                                                                                       |
| Detection                      | <b>KQC</b> - Can we be confident in the outcome assessment?                                              | +                           | DXA Method, different places                                                                                                                                                                             |

|                     |                                                                                     |    |
|---------------------|-------------------------------------------------------------------------------------|----|
| Selection           | Did selection of study participants result in appropriate comparison groups?        | +  |
| Attrition/exclusion | Were outcome data completely reported without attrition or exclusion from analysis? | +  |
| Selective reporting | Were all measured outcomes reported?                                                | ++ |

### A.8.11. Studies on cancer

**Table 86.** Risk of bias appraisal of studies on cancer (scores corresponding to one appraisal sal). Note: appraisal of individual studies focused only on risk of bias; additional quality aspects were considered when evaluating the overall confidence in the body of evidence (see Section 2.2.1.2 of the opinion).

| <b>INDUSTRIAL ACCIDENTS OR CONTAMINATION INCIDENTS</b> |                                                                                                          |                             |                                                 |
|--------------------------------------------------------|----------------------------------------------------------------------------------------------------------|-----------------------------|-------------------------------------------------|
| <b>Bertazzi et al. (2001)</b>                          |                                                                                                          | <b>Risk of bias tier: 2</b> |                                                 |
| <b>Bias domain</b>                                     | <b>Question</b>                                                                                          | <b>Score</b>                | <b>Judgement</b>                                |
| Confounding                                            | <b>KQA</b> - Did the study design or analysis account for important confounding and modifying variables? | -                           | Smoking status not known                        |
| Detection                                              | <b>KQB</b> - Can we be confident in the exposure characterisation?                                       | +                           |                                                 |
| Detection                                              | <b>KQC</b> - Can we be confident in the outcome assessment?                                              | ++                          |                                                 |
| Selection                                              | Did selection of study participants result in appropriate comparison groups?                             | +                           |                                                 |
| Attrition/exclusion                                    | Were outcome data completely reported without attrition or exclusion from analysis?                      | +                           |                                                 |
| Selective reporting                                    | Were all measured outcomes reported?                                                                     | ++                          |                                                 |
| <b>Warner et al. (2002)</b>                            |                                                                                                          | <b>Risk of bias tier: 1</b> |                                                 |
| <b>Bias domain</b>                                     | <b>Question</b>                                                                                          | <b>Score</b>                | <b>Judgement</b>                                |
| Confounding                                            | <b>KQA</b> - Did the study design or analysis account for important confounding and modifying variables? | +                           |                                                 |
| Detection                                              | <b>KQB</b> - Can we be confident in the exposure characterisation?                                       | +                           |                                                 |
| Detection                                              | <b>KQC</b> - Can we be confident in the outcome assessment?                                              | +                           |                                                 |
| Selection                                              | Did selection of study participants result in appropriate comparison groups?                             | +                           |                                                 |
| Attrition/exclusion                                    | Were outcome data completely reported without attrition or exclusion from analysis?                      | -                           | Only 80% participation                          |
| Selective reporting                                    | Were all measured outcomes reported?                                                                     | --                          | Only selected cases reported                    |
| <b>Pesatori et al. (2008)</b>                          |                                                                                                          | <b>Risk of bias tier: 2</b> |                                                 |
| <b>Bias domain</b>                                     | <b>Question</b>                                                                                          | <b>Score</b>                | <b>Judgement</b>                                |
| Confounding                                            | <b>KQA</b> - Did the study design or analysis account for important confounding and modifying            | NR                          | Confounding or modifying variables not recorded |

|                               |                                                                                                          |                             |                                                                                                                                       |
|-------------------------------|----------------------------------------------------------------------------------------------------------|-----------------------------|---------------------------------------------------------------------------------------------------------------------------------------|
|                               | variables?                                                                                               |                             |                                                                                                                                       |
| Detection                     | <b>KQB</b> - Can we be confident in the exposure characterisation?                                       | -                           | TCDD measurements not recorded                                                                                                        |
| Detection                     | <b>KQC</b> - Can we be confident in the outcome assessment?                                              | +                           |                                                                                                                                       |
| Selection                     | Did selection of study participants result in appropriate comparison groups?                             | ++                          |                                                                                                                                       |
| Attrition/exclusion           | Were outcome data completely reported without attrition or exclusion from analysis?                      | +                           |                                                                                                                                       |
| Selective reporting           | Were all measured outcomes reported?                                                                     | -                           | AIP loss of function mutations not recorded                                                                                           |
| <b>Consonni et al. (2008)</b> |                                                                                                          | <b>Risk of bias tier: 2</b> |                                                                                                                                       |
| <b>Bias domain</b>            | <b>Question</b>                                                                                          | <b>Score</b>                | <b>Judgement</b>                                                                                                                      |
| Confounding                   | <b>KQA</b> - Did the study design or analysis account for important confounding and modifying variables? | -                           | No data on confounding factors such as smoking                                                                                        |
| Detection                     | <b>KQB</b> - Can we be confident in the exposure characterisation?                                       | -                           | TCDD measured in soil and only a small number of serum samples collected                                                              |
| Detection                     | <b>KQC</b> - Can we be confident in the outcome assessment?                                              | +                           |                                                                                                                                       |
| Selection                     | Did selection of study participants result in appropriate comparison groups?                             | ++                          |                                                                                                                                       |
| Attrition/exclusion           | Were outcome data completely reported without attrition or exclusion from analysis?                      | ++                          |                                                                                                                                       |
| Selective reporting           | Were all measured outcomes reported?                                                                     | ++                          |                                                                                                                                       |
| <b>Pesatori et al. (2009)</b> |                                                                                                          | <b>Risk of bias tier: 2</b> |                                                                                                                                       |
| <b>Bias domain</b>            | <b>Question</b>                                                                                          | <b>Score</b>                | <b>Judgement</b>                                                                                                                      |
| Confounding                   | <b>KQA</b> - Did the study design or analysis account for important confounding and modifying variables? | -                           | No confounding or modifying agents mentioned                                                                                          |
| Detection                     | <b>KQB</b> - Can we be confident in the exposure characterisation?                                       | -                           | Environmental contamination serum measurements taken much later resident in area not necessarily present at time of accident measured |
| Detection                     | <b>KQC</b> - Can we be confident in the outcome assessment?                                              | ++                          |                                                                                                                                       |
| Selection                     | Did selection of study participants result in appropriate comparison groups?                             | ++                          |                                                                                                                                       |
| Attrition/exclusion           | Were outcome data completely reported without attrition or exclusion from analysis?                      | ++                          |                                                                                                                                       |
| Selective reporting           | Were all measured outcomes reported?                                                                     | ++                          |                                                                                                                                       |
| <b>Warner et al. (2011)</b>   |                                                                                                          | <b>Risk of bias tier: 1</b> |                                                                                                                                       |
| <b>Bias domain</b>            | <b>Question</b>                                                                                          | <b>Score</b>                | <b>Judgement</b>                                                                                                                      |
| Confounding                   | <b>KQA</b> - Did the study design or analysis account for important confounding and modifying variables? | ++                          |                                                                                                                                       |
| Detection                     | <b>KQB</b> - Can we be confident in the exposure characterisation?                                       | +                           |                                                                                                                                       |



|                               |                                                                                                          |                             |                         |
|-------------------------------|----------------------------------------------------------------------------------------------------------|-----------------------------|-------------------------|
| Detection                     | <b>KQC</b> - Can we be confident in the outcome assessment?                                              | ++                          |                         |
| Selection                     | Did selection of study participants result in appropriate comparison groups?                             | +                           |                         |
| Attrition/exclusion           | Were outcome data completely reported without attrition or exclusion from analysis?                      | +                           |                         |
| Selective reporting           | Were all measured outcomes reported?                                                                     | +                           |                         |
| <b>OCCUPATIONAL STUDIES</b>   |                                                                                                          |                             |                         |
| <b>Heederik et al. (1998)</b> |                                                                                                          | <b>Risk of bias tier: 1</b> |                         |
| <b>Bias domain</b>            | <b>Question</b>                                                                                          | <b>Score</b>                | <b>Judgement</b>        |
| Confounding                   | <b>KQA</b> - Did the study design or analysis account for important confounding and modifying variables? | +                           |                         |
| Detection                     | <b>KQB</b> - Can we be confident in the exposure characterisation?                                       | +                           |                         |
| Detection                     | <b>KQC</b> - Can we be confident in the outcome assessment?                                              | ++                          |                         |
| Selection                     | Did selection of study participants result in appropriate comparison groups?                             | +                           |                         |
| Attrition/exclusion           | Were outcome data completely reported without attrition or exclusion from analysis?                      | +                           |                         |
| Selective reporting           | Were all measured outcomes reported?                                                                     | +                           |                         |
| <b>Becher et al. (1998)</b>   |                                                                                                          | <b>Risk of bias tier: 1</b> |                         |
| <b>Bias domain</b>            | <b>Question</b>                                                                                          | <b>Score</b>                | <b>Judgement</b>        |
| Confounding                   | <b>KQA</b> - Did the study design or analysis account for important confounding and modifying variables? | +                           |                         |
| Detection                     | <b>KQB</b> - Can we be confident in the exposure characterisation?                                       | +                           |                         |
| Detection                     | <b>KQC</b> - Can we be confident in the outcome assessment?                                              | ++                          |                         |
| Selection                     | Did selection of study participants result in appropriate comparison groups?                             | +                           |                         |
| Attrition/exclusion           | Were outcome data completely reported without attrition or exclusion from analysis?                      | +                           |                         |
| Selective reporting           | Were all measured outcomes reported?                                                                     | +                           |                         |
| <b>Collins et al. (2009a)</b> |                                                                                                          | <b>Risk of bias tier: 1</b> |                         |
| <b>Bias domain</b>            | <b>Question</b>                                                                                          | <b>Score</b>                | <b>Judgement</b>        |
| Confounding                   | <b>KQA</b> - Did the study design or analysis account for important confounding and modifying variables? | +                           |                         |
| Detection                     | <b>KQB</b> - Can we be confident in the exposure characterisation?                                       | +                           |                         |
| Detection                     | <b>KQC</b> - Can we be confident in the outcome assessment?                                              | +                           |                         |
| Selection                     | Did selection of study participants result in appropriate comparison groups?                             | -                           | Small numbers described |
| Attrition/exclusion           | Were outcome data completely reported without attrition or                                               | +                           |                         |



|                                  | exclusion from analysis?                                                                                 |                             |                                                                 |
|----------------------------------|----------------------------------------------------------------------------------------------------------|-----------------------------|-----------------------------------------------------------------|
| Selective reporting              | Were all measured outcomes reported?                                                                     | +                           |                                                                 |
| <b>Collins et al. (2009b)</b>    |                                                                                                          | <b>Risk of bias tier: 2</b> |                                                                 |
| Bias domain                      | Question                                                                                                 | Score                       | Judgement                                                       |
| Confounding                      | <b>KQA</b> - Did the study design or analysis account for important confounding and modifying variables? | +                           |                                                                 |
| Detection                        | <b>KQB</b> - Can we be confident in the exposure characterisation?                                       | -                           | No estimated from historical data                               |
| Detection                        | <b>KQC</b> - Can we be confident in the outcome assessment?                                              | +                           |                                                                 |
| Selection                        | Did selection of study participants result in appropriate comparison groups?                             | +                           |                                                                 |
| Attrition/exclusion              | Were outcome data completely reported without attrition or exclusion from analysis?                      | +                           |                                                                 |
| Selective reporting              | Were all measured outcomes reported?                                                                     | +                           |                                                                 |
| <b>Flesh-Janys et al. (1998)</b> |                                                                                                          | <b>Risk of bias tier: 2</b> |                                                                 |
| Bias domain                      | Question                                                                                                 | Score                       | Judgement                                                       |
| Confounding                      | <b>KQA</b> - Did the study design or analysis account for important confounding and modifying variables? | -                           | Confounding factors were not addressed.                         |
| Detection                        | <b>KQB</b> - Can we be confident in the exposure characterisation?                                       | -                           | Measurements were only available for some workers.              |
| Detection                        | <b>KQC</b> - Can we be confident in the outcome assessment?                                              | +                           |                                                                 |
| Selection                        | Did selection of study participants result in appropriate comparison groups?                             | -                           | Study was in males but measurements from females also included. |
| Attrition/exclusion              | Were outcome data completely reported without attrition or exclusion from analysis?                      | +                           |                                                                 |
| Selective reporting              | Were all measured outcomes reported?                                                                     | +                           |                                                                 |
| <b>Steenland et al. (2001b)</b>  |                                                                                                          | <b>Risk of bias tier: 1</b> |                                                                 |
| Bias domain                      | Question                                                                                                 | Score                       | Judgement                                                       |
| Confounding                      | <b>KQA</b> - Did the study design or analysis account for important confounding and modifying variables? | +                           |                                                                 |
| Detection                        | <b>KQB</b> - Can we be confident in the exposure characterisation?                                       | +                           |                                                                 |
| Detection                        | <b>KQC</b> - Can we be confident in the outcome assessment?                                              | ++                          |                                                                 |
| Selection                        | Did selection of study participants result in appropriate comparison groups?                             | -                           | All participants exposed                                        |
| Attrition/exclusion              | Were outcome data completely reported without attrition or exclusion from analysis?                      | +                           |                                                                 |
| Selective reporting              | Were all measured outcomes reported?                                                                     | +                           |                                                                 |
| <b>Ketchum et al. (1999)</b>     |                                                                                                          | <b>Risk of bias tier: 2</b> |                                                                 |
| Bias domain                      | Question                                                                                                 | Score                       | Judgement                                                       |
| Confounding                      | <b>KQA</b> - Did the study design or analysis account for important                                      | +                           |                                                                 |

|                                    |                                                                                                          |                             |                                                                                                                                     |
|------------------------------------|----------------------------------------------------------------------------------------------------------|-----------------------------|-------------------------------------------------------------------------------------------------------------------------------------|
|                                    | confounding and modifying variables?                                                                     |                             |                                                                                                                                     |
| Detection                          | <b>KQB</b> - Can we be confident in the exposure characterisation?                                       | -                           | Aerial spraying so cannot be confident of exposure                                                                                  |
| Detection                          | <b>KQC</b> - Can we be confident in the outcome assessment?                                              | +                           |                                                                                                                                     |
| Selection                          | Did selection of study participants result in appropriate comparison groups?                             | +                           |                                                                                                                                     |
| Attrition/exclusion                | Were outcome data completely reported without attrition or exclusion from analysis?                      | +                           |                                                                                                                                     |
| Selective reporting                | Were all measured outcomes reported?                                                                     | +                           |                                                                                                                                     |
| <b>Akhtar et al. (2004)</b>        |                                                                                                          | <b>Risk of bias tier: 2</b> |                                                                                                                                     |
| <b>Bias domain</b>                 | <b>Question</b>                                                                                          | <b>Score</b>                | <b>Judgement</b>                                                                                                                    |
| Confounding                        | <b>KQA</b> - Did the study design or analysis account for important confounding and modifying variables? | +                           |                                                                                                                                     |
| Detection                          | <b>KQB</b> - Can we be confident in the exposure characterisation?                                       | -                           | Aerial spraying so cannot be confident of exposure                                                                                  |
| Detection                          | <b>KQC</b> - Can we be confident in the outcome assessment?                                              | +                           |                                                                                                                                     |
| Selection                          | Did selection of study participants result in appropriate comparison groups?                             | +                           |                                                                                                                                     |
| Attrition/exclusion                | Were outcome data completely reported without attrition or exclusion from analysis?                      | +                           |                                                                                                                                     |
| Selective reporting                | Were all measured outcomes reported?                                                                     | +                           |                                                                                                                                     |
| <b>Pavuk et al. (2005)</b>         |                                                                                                          | <b>Risk of bias tier: 2</b> |                                                                                                                                     |
| <b>Bias domain</b>                 | <b>Question</b>                                                                                          | <b>Score</b>                | <b>Judgement</b>                                                                                                                    |
| Confounding                        | <b>KQA</b> - Did the study design or analysis account for important confounding and modifying variables? | +                           |                                                                                                                                     |
| Detection                          | <b>KQB</b> - Can we be confident in the exposure characterisation?                                       | -                           | Aerial spraying so cannot be confident of exposure                                                                                  |
| Detection                          | <b>KQC</b> - Can we be confident in the outcome assessment?                                              | ++                          |                                                                                                                                     |
| Selection                          | Did selection of study participants result in appropriate comparison groups?                             | ++                          |                                                                                                                                     |
| Attrition/exclusion                | Were outcome data completely reported without attrition or exclusion from analysis?                      | ++                          |                                                                                                                                     |
| Selective reporting                | Were all measured outcomes reported?                                                                     | -                           | Multiple cancer cases not reported                                                                                                  |
| <b>Ketchum and Michalek (2005)</b> |                                                                                                          | <b>Risk of bias tier: 1</b> |                                                                                                                                     |
| <b>Bias domain</b>                 | <b>Question</b>                                                                                          | <b>Score</b>                | <b>Judgement</b>                                                                                                                    |
| Confounding                        | <b>KQA</b> - Did the study design or analysis account for important confounding and modifying variables? | -                           | Smoking and other confounders were not assessed on individual level but were available for a subgroup indicating minor differences. |
| Detection                          | <b>KQB</b> - Can we be confident in the exposure characterisation?                                       | -                           | Considerable non-differential misclassification, since individual data were available only in part of the subjects.                 |
| Detection                          | <b>KQC</b> - Can we be confident in the outcome assessment?                                              | ++                          |                                                                                                                                     |

|                                  |                                                                                                          |                             |                                                                                     |
|----------------------------------|----------------------------------------------------------------------------------------------------------|-----------------------------|-------------------------------------------------------------------------------------|
| Selection                        | Did selection of study participants result in appropriate comparison groups?                             | +                           |                                                                                     |
| Attrition/<br>exclusion          | Were outcome data completely reported without attrition or exclusion from analysis?                      | +                           |                                                                                     |
| Selective reporting              | Were all measured outcomes reported?                                                                     | +                           |                                                                                     |
| <b>Kang et al. (2006)</b>        |                                                                                                          | <b>Risk of bias tier: 2</b> |                                                                                     |
| <b>Bias domain</b>               | <b>Question</b>                                                                                          | <b>Score</b>                | <b>Judgement</b>                                                                    |
| Confounding                      | <b>KQA</b> - Did the study design or analysis account for important confounding and modifying variables? | +                           | Smoking and some other confounders could be adjusted for. Telephone interviews only |
| Detection                        | <b>KQB</b> - Can we be confident in the exposure characterisation?                                       | -                           | Aerial spraying so cannot be confident of exposure                                  |
| Detection                        | <b>KQC</b> - Can we be confident in the outcome assessment?                                              | +                           |                                                                                     |
| Selection                        | Did selection of study participants result in appropriate comparison groups?                             | +                           |                                                                                     |
| Attrition/<br>exclusion          | Were outcome data completely reported without attrition or exclusion from analysis?                      | +                           |                                                                                     |
| Selective reporting              | Were all measured outcomes reported?                                                                     | +                           |                                                                                     |
| <b>Pavuk et al. (2006)</b>       |                                                                                                          | <b>Risk of bias tier: 2</b> |                                                                                     |
| <b>Bias domain</b>               | <b>Question</b>                                                                                          | <b>Score</b>                | <b>Judgement</b>                                                                    |
| Confounding                      | <b>KQA</b> - Did the study design or analysis account for important confounding and modifying variables? | -                           | No confounding or modifying factors mentioned                                       |
| Detection                        | <b>KQB</b> - Can we be confident in the exposure characterisation?                                       | -                           | Aerial spraying so cannot be confident of exposure                                  |
| Detection                        | <b>KQC</b> - Can we be confident in the outcome assessment?                                              | +                           |                                                                                     |
| Selection                        | Did selection of study participants result in appropriate comparison groups?                             | +                           |                                                                                     |
| Attrition/<br>exclusion          | Were outcome data completely reported without attrition or exclusion from analysis?                      | +                           |                                                                                     |
| Selective reporting              | Were all measured outcomes reported?                                                                     | +                           |                                                                                     |
| <b>Michalek and Pavuk (2008)</b> |                                                                                                          | <b>Risk of bias tier: 1</b> |                                                                                     |
| <b>Bias domain</b>               | <b>Question</b>                                                                                          | <b>Score</b>                | <b>Judgement</b>                                                                    |
| Confounding                      | <b>KQA</b> - Did the study design or analysis account for important confounding and modifying variables? | +                           |                                                                                     |
| Detection                        | <b>KQB</b> - Can we be confident in the exposure characterisation?                                       | +                           |                                                                                     |
| Detection                        | <b>KQC</b> - Can we be confident in the outcome assessment?                                              | +                           |                                                                                     |
| Selection                        | Did selection of study participants result in appropriate comparison groups?                             | +                           |                                                                                     |
| Attrition/<br>exclusion          | Were outcome data completely reported without attrition or exclusion from analysis?                      | +                           |                                                                                     |
| Selective reporting              | Were all measured outcomes reported?                                                                     | +                           |                                                                                     |

| <b>Li et al. (2013)</b>        |                                                                                                          | <b>Risk of bias tier: 2</b> |                                                    |
|--------------------------------|----------------------------------------------------------------------------------------------------------|-----------------------------|----------------------------------------------------|
| <b>Bias domain</b>             | <b>Question</b>                                                                                          | <b>Score</b>                | <b>Judgement</b>                                   |
| Confounding                    | <b>KQA</b> - Did the study design or analysis account for important confounding and modifying variables? | -                           | Confounding or modifying agents not mentioned      |
| Detection                      | <b>KQB</b> - Can we be confident in the exposure characterisation?                                       | -                           | Aerial spraying so cannot be confident of exposure |
| Detection                      | <b>KQC</b> - Can we be confident in the outcome assessment?                                              | +                           |                                                    |
| Selection                      | Did selection of study participants result in appropriate comparison groups?                             | -                           | Selection bias only patients undergoing g RP       |
| Attrition/exclusion            | Were outcome data completely reported without attrition or exclusion from analysis?                      | +                           |                                                    |
| Selective reporting            | Were all measured outcomes reported?                                                                     | +                           |                                                    |
| <b>Landgreen et al. (2015)</b> |                                                                                                          | <b>Risk of bias tier: 2</b> |                                                    |
| <b>Bias domain</b>             | <b>Question</b>                                                                                          | <b>Score</b>                | <b>Judgement</b>                                   |
| Confounding                    | <b>KQA</b> - Did the study design or analysis account for important confounding and modifying variables? | +                           |                                                    |
| Detection                      | <b>KQB</b> - Can we be confident in the exposure characterisation?                                       | -                           | Aerial spraying so cannot be confident of exposure |
| Detection                      | <b>KQC</b> - Can we be confident in the outcome assessment?                                              | +                           |                                                    |
| Selection                      | Did selection of study participants result in appropriate comparison groups?                             | +                           |                                                    |
| Attrition/exclusion            | Were outcome data completely reported without attrition or exclusion from analysis?                      | +                           |                                                    |
| Selective reporting            | Were all measured outcomes reported?                                                                     | +                           |                                                    |
| <b>Hooiveld et al. (1998)</b>  |                                                                                                          | <b>Risk of bias tier: 2</b> |                                                    |
| <b>Bias domain</b>             | <b>Question</b>                                                                                          | <b>Score</b>                | <b>Judgement</b>                                   |
| Confounding                    | <b>KQA</b> - Did the study design or analysis account for important confounding and modifying variables? | -                           | No confounding or modifying agents mentioned       |
| Detection                      | <b>KQB</b> - Can we be confident in the exposure characterisation?                                       | +                           |                                                    |
| Detection                      | <b>KQC</b> - Can we be confident in the outcome assessment?                                              | -                           | Only measured TCDD in 47 samples                   |
| Selection                      | Did selection of study participants result in appropriate comparison groups?                             | +                           |                                                    |
| Attrition/exclusion            | Were outcome data completely reported without attrition or exclusion from analysis?                      | +                           |                                                    |
| Selective reporting            | Were all measured outcomes reported?                                                                     | +                           |                                                    |
| <b>Boers et al. (2012)</b>     |                                                                                                          | <b>Risk of bias tier: 2</b> |                                                    |
| <b>Bias domain</b>             | <b>Question</b>                                                                                          | <b>Score</b>                | <b>Judgement</b>                                   |
| Confounding                    | <b>KQA</b> - Did the study design or analysis account for important confounding and modifying variables? | -                           | No confounding or modifying agents mentioned       |
| Detection                      | <b>KQB</b> - Can we be confident in the exposure characterisation?                                       | +                           |                                                    |

|                                |                                                                                                          |                             |                                                                                                                                             |
|--------------------------------|----------------------------------------------------------------------------------------------------------|-----------------------------|---------------------------------------------------------------------------------------------------------------------------------------------|
| Detection                      | <b>KQC</b> - Can we be confident in the outcome assessment?                                              | +                           |                                                                                                                                             |
| Selection                      | Did selection of study participants result in appropriate comparison groups?                             | +                           |                                                                                                                                             |
| Attrition/exclusion            | Were outcome data completely reported without attrition or exclusion from analysis?                      | -                           | All female workers excluded                                                                                                                 |
| Selective reporting            | Were all measured outcomes reported?                                                                     | +                           |                                                                                                                                             |
| <b>OTHER STUDIES</b>           |                                                                                                          |                             |                                                                                                                                             |
| <b>Steenland et al. (1999)</b> |                                                                                                          | <b>Risk of bias tier: 2</b> |                                                                                                                                             |
| <b>Bias domain</b>             | <b>Question</b>                                                                                          | <b>Score</b>                | <b>Judgement</b>                                                                                                                            |
| Confounding                    | <b>KQA</b> - Did the study design or analysis account for important confounding and modifying variables? | -                           | No confounding or modifying agents mentioned                                                                                                |
| Detection                      | <b>KQB</b> - Can we be confident in the exposure characterisation?                                       | -                           | No individual TCDD data, only estimates by JEM. Another paper supports the ranking and gives serum TCDD levels for part of the individuals. |
| Detection                      | <b>KQC</b> - Can we be confident in the outcome assessment?                                              | +                           |                                                                                                                                             |
| Selection                      | Did selection of study participants result in appropriate comparison groups?                             | -                           | Unequal numbers in selected groups                                                                                                          |
| Attrition/exclusion            | Were outcome data completely reported without attrition or exclusion from analysis?                      | ++                          |                                                                                                                                             |
| Selective reporting            | Were all measured outcomes reported?                                                                     | +                           |                                                                                                                                             |
| <b>De Roos et al. (2005)</b>   |                                                                                                          | <b>Risk of bias tier: 2</b> |                                                                                                                                             |
| <b>Bias domain</b>             | <b>Question</b>                                                                                          | <b>Score</b>                | <b>Judgement</b>                                                                                                                            |
| Confounding                    | <b>KQA</b> - Did the study design or analysis account for important confounding and modifying variables? | -                           | No confounding or modifying agents mentioned                                                                                                |
| Detection                      | <b>KQB</b> - Can we be confident in the exposure characterisation?                                       | +                           |                                                                                                                                             |
| Detection                      | <b>KQC</b> - Can we be confident in the outcome assessment?                                              | -                           | Limited number of samples where detection was found                                                                                         |
| Selection                      | Did selection of study participants result in appropriate comparison groups?                             | +                           |                                                                                                                                             |
| Attrition/exclusion            | Were outcome data completely reported without attrition or exclusion from analysis?                      | -                           | Computer assisted interview                                                                                                                 |
| Selective reporting            | Were all measured outcomes reported?                                                                     | +                           |                                                                                                                                             |
| <b>McBride et al. (2009)</b>   |                                                                                                          | <b>Risk of bias tier: 2</b> |                                                                                                                                             |
| <b>Bias domain</b>             | <b>Question</b>                                                                                          | <b>Score</b>                | <b>Judgement</b>                                                                                                                            |
| Confounding                    | <b>KQA</b> - Did the study design or analysis account for important confounding and modifying variables? | +                           |                                                                                                                                             |
| Detection                      | <b>KQB</b> - Can we be confident in the exposure characterisation?                                       | -                           | Mixed exposure                                                                                                                              |
| Detection                      | <b>KQC</b> - Can we be confident in the outcome assessment?                                              | -                           | Small numbers cannot exclude by chance                                                                                                      |
| Selection                      | Did selection of study participants result in appropriate comparison                                     | +                           |                                                                                                                                             |

|                               |                                                                                                          |                             |                                                              |
|-------------------------------|----------------------------------------------------------------------------------------------------------|-----------------------------|--------------------------------------------------------------|
|                               | groups?                                                                                                  |                             |                                                              |
| Attrition/<br>exclusion       | Were outcome data completely reported without attrition or exclusion from analysis?                      | -                           | 21% loss to follow up                                        |
| Selective reporting           | Were all measured outcomes reported?                                                                     | +                           |                                                              |
| <b>Viel et al. (2011)</b>     |                                                                                                          | <b>Risk of bias tier: 3</b> |                                                              |
| <b>Bias domain</b>            | <b>Question</b>                                                                                          | <b>Score</b>                | <b>Judgement</b>                                             |
| Confounding                   | <b>KQA</b> - Did the study design or analysis account for important confounding and modifying variables? | -                           | No confounding or modifying agents mentioned                 |
| Detection                     | <b>KQB</b> - Can we be confident in the exposure characterisation?                                       | -                           | Mixed exposure from incinerator                              |
| Detection                     | <b>KQC</b> - Can we be confident in the outcome assessment?                                              | -                           | Only 34 cases examined some undergoing chemotherapy          |
| Selection                     | Did selection of study participants result in appropriate comparison groups?                             | +                           |                                                              |
| Attrition/<br>exclusion       | Were outcome data completely reported without attrition or exclusion from analysis?                      | -                           | 8 cases excluded                                             |
| Selective reporting           | Were all measured outcomes reported?                                                                     | -                           | Cumulative sum of congeners reported rather than individuals |
| <b>Manuwald et al. (2012)</b> |                                                                                                          | <b>Risk of bias tier: 2</b> |                                                              |
| <b>Bias domain</b>            | <b>Question</b>                                                                                          | <b>Score</b>                | <b>Judgement</b>                                             |
| Confounding                   | <b>KQA</b> - Did the study design or analysis account for important confounding and modifying variables? | -                           | No confounding or modifying agents mentioned                 |
| Detection                     | <b>KQB</b> - Can we be confident in the exposure characterisation?                                       | +                           |                                                              |
| Detection                     | <b>KQC</b> - Can we be confident in the outcome assessment?                                              | +                           |                                                              |
| Selection                     | Did selection of study participants result in appropriate comparison groups?                             | -                           | Exposed only                                                 |
| Attrition/<br>exclusion       | Were outcome data completely reported without attrition or exclusion from analysis?                      | ++                          |                                                              |
| Selective reporting           | Were all measured outcomes reported?                                                                     | +                           |                                                              |
| <b>Cheng et al. (2006)</b>    |                                                                                                          | <b>Risk of bias tier: 2</b> |                                                              |
| <b>Bias domain</b>            | <b>Question</b>                                                                                          | <b>Score</b>                | <b>Judgement</b>                                             |
| Confounding                   | <b>KQA</b> - Did the study design or analysis account for important confounding and modifying variables? | -                           | No confounding or modifying agents mentioned                 |
| Detection                     | <b>KQB</b> - Can we be confident in the exposure characterisation?                                       | +                           |                                                              |
| Detection                     | <b>KQC</b> - Can we be confident in the outcome assessment?                                              | +                           |                                                              |
| Selection                     | Did selection of study participants result in appropriate comparison groups?                             | -                           | Unequal numbers in selected groups                           |
| Attrition/<br>exclusion       | Were outcome data completely reported without attrition or exclusion from analysis?                      | ++                          |                                                              |
| Selective reporting           | Were all measured outcomes reported?                                                                     | +                           |                                                              |
| <b>Boers et al. (2010)</b>    |                                                                                                          | <b>Risk of bias tier: 2</b> |                                                              |

| Bias domain               | Question                                                                                                 | Score                       | Judgement                                                                                                                                                                                     |
|---------------------------|----------------------------------------------------------------------------------------------------------|-----------------------------|-----------------------------------------------------------------------------------------------------------------------------------------------------------------------------------------------|
| Confounding               | <b>KQA</b> - Did the study design or analysis account for important confounding and modifying variables? | -                           | Lack of data on potential confounders, but smoking prevalence was considered similar to referents.                                                                                            |
| Detection                 | <b>KQB</b> - Can we be confident in the exposure characterisation?                                       | +                           | Individual TCDD data only for a subgroup, but the difference between "exposed" and non-exposed is valid. However non-differential misclassification is likely to be large in the ER analyses. |
| Detection                 | <b>KQC</b> - Can we be confident in the outcome assessment?                                              | +                           |                                                                                                                                                                                               |
| Selection                 | Did selection of study participants result in appropriate comparison groups?                             | -                           | Participation based on complete company registers. External reference group with likely some 'healthy worker selection'.                                                                      |
| Attrition/exclusion       | Were outcome data completely reported without attrition or exclusion from analysis?                      | +                           |                                                                                                                                                                                               |
| Selective reporting       | Were all measured outcomes reported?                                                                     | ++                          |                                                                                                                                                                                               |
| <b>Lin et al. (2012b)</b> |                                                                                                          | <b>Risk of bias tier: 1</b> |                                                                                                                                                                                               |
| Bias domain               | Question                                                                                                 | Score                       | Judgement                                                                                                                                                                                     |
| Confounding               | <b>KQA</b> - Did the study design or analysis account for important confounding and modifying variables? | +                           |                                                                                                                                                                                               |
| Detection                 | <b>KQB</b> - Can we be confident in the exposure characterisation?                                       | ++                          |                                                                                                                                                                                               |
| Detection                 | <b>KQC</b> - Can we be confident in the outcome assessment?                                              | +                           |                                                                                                                                                                                               |
| Selection                 | Did selection of study participants result in appropriate comparison groups?                             | ++                          |                                                                                                                                                                                               |
| Attrition/exclusion       | Were outcome data completely reported without attrition or exclusion from analysis?                      | +                           |                                                                                                                                                                                               |
| Selective reporting       | Were all measured outcomes reported?                                                                     | +                           |                                                                                                                                                                                               |

## ANNEX A.10. EFFECTS OF PCDD/Fs AND DL-PCBs ON SERUM LEVELS OF SEX HORMONES AND RELATED PROTEINS

Reported changes in serum levels of sex hormones and related proteins following associations with postnatal or pre/postnatal PCDD/F and DL-PCB exposures are summarised in Table 87. These studies are described or mentioned in Sections 3.1.4.3.1, 3.1.4.3.2, 3.1.4.4–3.1.4.6, 3.1.4.8 and 3.1.4.12.

**Table 87.** Direction of changes in serum concentrations of sex hormones and related proteins/peptides associated with PCDD/F and DL-PCB exposure. [↑]: increase. [↓]: decrease. [-]: no change

|                                                        | Sex              | Exposure measure    | Age at sampling (years) | ASD | Testosterone | DHT | DHEA | SHBG | Inhibin-B | FSH | LH | E1 | E2 | Progesterone | Ratio |
|--------------------------------------------------------|------------------|---------------------|-------------------------|-----|--------------|-----|------|------|-----------|-----|----|----|----|--------------|-------|
|                                                        |                  |                     |                         |     |              |     |      |      |           |     |    |    |    |              |       |
| <b>STUDIES IN MALES (newborns, infants, boys, men)</b> |                  |                     |                         |     |              |     |      |      |           |     |    |    |    |              |       |
| <b>Industrial accidents or contamination incidents</b> |                  |                     |                         |     |              |     |      |      |           |     |    |    |    |              |       |
| <b>Mocarelli et al. (2008)</b>                         | Men              | Serum 1976/77       | 40–47 y                 | -   | -            | -   | -    | -    | -         | -   | -  | -  | -  | -            | -     |
|                                                        | Men              | Serum 1976/77       | 22–31 y                 | -   | -            | -   | -    | -    | -         | ↑   | -  | -  | ↓  | -            | -     |
|                                                        | Men              | Serum 1976/77       | 32–39 y                 | -   | -            | -   | -    | -    | -         | ↑   | ↓  | -  | ↓  | -            | -     |
| <b>Mocarelli et al. (2011)</b>                         | Boys/Breast-fed  | Maternal serum 1976 | 18–26 y                 | -   | -            | -   | -    | -    | ↓         | ↑   | -  | -  | -  | -            | -     |
|                                                        | Boys/Formula fed | Maternal serum 1976 | 18–26 y                 | -   | -            | -   | -    | -    | -         | -   | -  | -  | -  | -            | -     |
| <b>Sun et al. (2014)</b>                               | Men              | Serum               | 56–81 y                 | -   | -            | -   | -    | -    | -         | -   | -  | -  | -  | -            | -     |
| <b>Occupational exposure</b>                           |                  |                     |                         |     |              |     |      |      |           |     |    |    |    |              |       |
| <b>Michalek et al. (1999a)</b>                         | Men              | Serum               | 50–55 y                 | -   | -            | -   | -    | -    | -         | -   | -  | -  | -  | -            | -     |
| <b>Gupta et al. (2006)</b>                             | Men              | Serum               | 49 y                    | -   | ↓            | -   | -    | -    | -         | -   | -  | -  | -  | -            | -     |
| <b>Pelclova et al. (2009)</b>                          | Men              | Serum,              | 64.4 y                  | -   | -            | -   | -    | -    | -         | -   | -  | -  | -  | -            | -     |
| <b>Johnson et al. (2001)</b>                           | Men              | Serum               | 29–76 y                 | -   | ↓            | -   | -    | -    | -         | -   | -  | -  | -  | -            | -     |
| <b>Background exposure</b>                             |                  |                     |                         |     |              |     |      |      |           |     |    |    |    |              |       |
| <b>Dhooge et al. (2006)</b>                            | Men              | Serum               | 20–40 y                 | -   | ↓            | -   | -    | -    | -         | -   | -  | -  | -  | -            | -     |
| <b>Den Hond et al. (2002)</b>                          | Boys             | Serum               | 17 y                    | -   | -            | -   | -    | -    | -         | -   | -  | -  | -  | -            | -     |
| <b>Croes et al. (2014)</b>                             | Boys             | Serum               | 14–15 y                 | -   | -            | -   | -    | -    | -         | -   | -  | -  | -  | -            | -     |



|                                                        |                                                      |     |   |   |   |   |   |       |
|--------------------------------------------------------|------------------------------------------------------|-----|---|---|---|---|---|-------|
| <b>Virtanen et al. (2012)</b>                          | Boys<br>Placenta<br>3 months                         | -   | - | - | - | ↑ |   |       |
| <b>Su et al. (2012)</b>                                | Boys <sup>(b)</sup><br>Placenta<br>8 y               | (c) |   |   | - | - |   | ↓     |
| <b>Cao et al. (2008)</b>                               | Boys <sup>(b)</sup><br>Cord blood<br>Newborn         | ↓   |   |   |   |   |   | ↓     |
| <b>Rennert et al. (2012)<sup>(a)</sup></b>             | Boys <sup>(b)</sup><br>Maternal blood/milk<br>6/8 y  | (c) | ↑ |   |   |   |   | (c)   |
| <b>STUDIES IN FEMALES (newborns, girls, women)</b>     |                                                      |     |   |   |   |   |   |       |
| <b>Industrial accidents or contamination incidents</b> |                                                      |     |   |   |   |   |   |       |
| <b>Warner et al. (2007)</b>                            | Women<br>Serum 1976/77<br>20–40 y                    |     |   |   |   |   | - | -     |
| <b>Wang et al. (2006)</b>                              | Women/Pregnant<br>Placenta<br>28–30 y                | -   | - | - |   |   | - | ↓ - ↓ |
| <b>Background exposure</b>                             |                                                      |     |   |   |   |   |   |       |
| <b>Su et al. (2012)</b>                                | Girls <sup>(b)</sup><br>Placenta<br>8 y              | (c) |   |   | - | - |   | ↓     |
| <b>Cao et al. (2008)</b>                               | Girls <sup>(b)</sup><br>Cord blood<br>Newborn        | ↓   |   |   |   |   |   | ↓     |
| <b>Rennert et al. (2012)<sup>(a)</sup></b>             | Girls <sup>(b)</sup><br>Maternal blood/milk<br>6/8 y | (c) | ↑ |   |   |   |   | (c)   |

ASD: Androstendione; DHT: Dihydrotestosterone; DHEA: Dehydroepiandrosterone; SHBG: Steroidhormonebinding globuline; FSH: Follicle stimulating hormone; LH: Luteinizing hormone; E1: Estrone; E2: Estradiol; Ratio: 4-OH-E2/2-OH-E2.

(a): 17-OHP=17-hydroxyprogesterone was analysed by Rennert et al. (2012) to preclude an early onset of the adrenogenital syndrome. All samples were below cut-off level.

(b): No difference between boys and girls.

(c): Serum concentrations were below the level of detection.

## ANNEX A.11. STUDIES ON THE ADVERSE EFFECTS OF PCDD/Fs and DL-PCBs IN FARM AND COMPANION ANIMALS

### A.11.1. Studies in ruminants

**Table 88.** Studies on the adverse effects of PCDD/Fs and/or DL-PCBs in ruminants (cow, sheep and goats)

| Reference                                                                                                                                                                | Compounds and dose regime                                                                                                            | Endpoint                                    | Comments                                                                                                                                                                                                                                                                                                                                                                                        |
|--------------------------------------------------------------------------------------------------------------------------------------------------------------------------|--------------------------------------------------------------------------------------------------------------------------------------|---------------------------------------------|-------------------------------------------------------------------------------------------------------------------------------------------------------------------------------------------------------------------------------------------------------------------------------------------------------------------------------------------------------------------------------------------------|
| <b>COWS AND BUFFALOES</b>                                                                                                                                                |                                                                                                                                      |                                             |                                                                                                                                                                                                                                                                                                                                                                                                 |
| <b>Lavrusenko et al. (1996).</b> Effect of dioxine on the immune system of farm animals.                                                                                 | Not clear but probably TCDD<br>5, 10 µg/kg (for 15 days)<br>30 µg/kg (for 10 days)<br>5, 10 and 30 µg/kg (for 30 days)<br>Oral admin | Immunotoxicity                              | Dosing seems very high but reporting is not clear. Effects are not clearly presented. Most of the controls seem to be missing. Apparently high mortality; due to treatment?<br><i>Study not suitable for the risk assessment.</i>                                                                                                                                                               |
| <b>Cigliano et al. (2016).</b> Evaluation of serum markers of blood redox homeostasis and inflammation in PCB naturally contaminated heifers undergoing decontamination. | 17 PCDD/Fs<br>+ 12 DL-PCBs<br><i>Field exposure</i>                                                                                  | Oxidative stress<br>Liver weight            | Young cows exposed due to nearby decontamination plant; animals transferred to clean area; TEQ levels around 25 pg TEQ/g fat, primarily due to DL-PCBs; also NDL-PCBs around 165 ng/g; levels decreased in 6 months follow-up; also strong growth. Parameters related to oxidative stress, showing decrease; endpoint not suitable for RA.<br><i>Study not suitable for the risk assessment</i> |
| <b>Genuardo et al. (2012).</b> Chromosome fragility in river buffalo cows exposed to dioxins.                                                                            | 17 PCDD/Fs + 12 DL-PCBs<br><i>Field exposure</i><br><i>Case study</i>                                                                | Chromosome fragility                        | Cows (buffalo) from Campania region; milk levels 22 pg TEQ/g fat (primarily PCDD/Fs; possibly CALUX), not detected in milk from control farm; chromosome aberrations and SCEs in lymphocytes. Probably mixed exposure.<br><i>Study not useful for RA</i>                                                                                                                                        |
| <b>Iannuzzi et al. (2009).</b> Chromosome analyses in dairy cows exposed to dioxins and dioxin-like PCBs using the SCE test.                                             | 17 PCDD/Fs + 12 DL-PCBs<br><i>Field exposure</i><br><i>Case study</i>                                                                | SCE                                         | Cows (dairy); Susa valley; steel plant. Field exposure with 2 herds, one showing elevated TEQ in milk (19 vs 2 pg TEQ/g fat, primarily DL-PCBs); possibly mixed exposure; end-point not suitable for RA.<br><i>Study not suitable for the risk assessment</i>                                                                                                                                   |
| <b>Spagnuolo et al. (2012).</b> Analysis of plasma indices of redox homeostasis in dairy cows reared in polluted areas of Piedmont (northern Italy).                     | 17 PCDD/Fs + 12 DL-PCBs<br><i>Field exposure</i>                                                                                     | Retinol, ascorbate, N-tyr, blood parameters | Cows (dairy); Susa valley; steel plant. Field exposure with 3 herds, two showing elevated TEQ in milk (9, 19.1 vs 2 pg TEQ/g fat; primarily DL-PCBs); possibly mixed exposure; end-points not suitable for RA.                                                                                                                                                                                  |

| Reference                                                                                                                                                                                  | Compounds and dose regime                                                                                         | Endpoint                                 | Comments                                                                                                                                                                                                                                                                                                                                                                                |
|--------------------------------------------------------------------------------------------------------------------------------------------------------------------------------------------|-------------------------------------------------------------------------------------------------------------------|------------------------------------------|-----------------------------------------------------------------------------------------------------------------------------------------------------------------------------------------------------------------------------------------------------------------------------------------------------------------------------------------------------------------------------------------|
|                                                                                                                                                                                            |                                                                                                                   | redox status                             | <i>Study not suitable for the risk assessment</i>                                                                                                                                                                                                                                                                                                                                       |
| <b>Chamberland et al. (1994)</b> . Clinical-chemistry, growth and PCB levels in beef-cattle exposed to a PCB fire.                                                                         | PCB-118<br><i>Field exposure</i>                                                                                  | Growth, clinical chemistry               | Incident with PCB; levels in body fat. Study concerns a field study with cows (heifers) exposed to a mixture of PCBs, no data on TEQs.<br><i>Study not suitable for the risk assessment</i>                                                                                                                                                                                             |
| <b>Lloyd et al. (1991)</b> . Toxicity from ragwort and fat cow syndrome, or from industrial-chemicals - the value of epidemiologic analysis for interpreting clinicopathological findings. | (dioxins)<br><i>Field exposure</i>                                                                                | Other                                    | Case report of two farms likely to be affected by nearby waste incinerators. No levels in tissues; possibly coexposure to other contaminants.<br><i>Study not suitable for the risk assessment</i>                                                                                                                                                                                      |
| <b>Spagnuolo et al. (2011)</b> . Effect of dioxin exposure on several indices of blood redox status in lactating buffalo cows.                                                             | TEQs<br><i>Field exposure</i>                                                                                     | Plasma proteins, blood redox status      | Cows (buffalo) from Campania region; milk levels 22 pg TEQ/g fat (primarily PCDD/Fs; possibly CALUX), not detected in milk from control farm; only parameters related to oxidative stress. Probably mixed exposure.<br><i>Study not useful for the risk assessment</i>                                                                                                                  |
| <b>Davies et al. (1985)</b> . Possible dioxin poisoning in cattle.                                                                                                                         | (TCDD)<br><i>Field exposure</i>                                                                                   | Other                                    | Case report Cow (zebu); dead calves (63%), severe clinical jaundice; spraying nearby paddock with 2,4,5-T; route of exposure unclear; no measurements.<br><i>Study not suitable for the risk assessment</i>                                                                                                                                                                             |
| <b>SHEEP</b>                                                                                                                                                                               |                                                                                                                   |                                          |                                                                                                                                                                                                                                                                                                                                                                                         |
| <b>Lavrusenko et al. (1996)</b> . Effect of dioxine on the immune system of farm animals.                                                                                                  | Probably TCDD but unclear<br>Unclear dose regime                                                                  | Immunotoxicity                           | Dosing seems very high but is not very clear, and also the effects are not clearly presented. Most of the controls seem to be missing. Apparently high mortality; due to treatment?<br><i>Study not suitable for the risk assessment</i>                                                                                                                                                |
| <b>Gutleb et al. (2011)</b> . Effects of pre- and postnatal polychlorinated biphenyl exposure on emotional reactivity observed in lambs before weaning.                                    | PCB-118<br>49 µg/kg bw/day<br>Oral gavage (corn oil)<br>3 times/week for 6 months<br>(from mating until delivery) | Behavioural effects                      | <i>In utero</i> exposure via the dams. Cross contamination/co-admin with PCB-153. Levels in tissues of lambs reported in Berg et al. (2010), but summarized in this paper. PCB 118 levels 6-7 fold lower in PCB 153 than in 118 group. Some differences in behavioural effects observed. Impurities (no-PCBs, PCDFs) not reported.<br><i>Study not suitable for the risk assessment</i> |
| <b>Zimmer et al. (2013)</b> . Fetal Adrenal Development: Comparing Effects of Combined Exposures to PCB 118 and PCB 153 in a Sheep Model.                                                  | PCB-118<br>49 µg/kg bw/day<br>Oral gavage (corn oil)                                                              | Reproductive effects<br>Effects on other | Strong decrease in cortisol levels both in PCB 118 and 153 group. Effect may be due to PCB 153 rather than 118. Impurities not reported.                                                                                                                                                                                                                                                |

| Reference                                                                                                                                                                                                                           | Compounds and dose regime                                                                                            | Endpoint                                                                    | Comments                                                                                                                                                                                                                                                                                                         |
|-------------------------------------------------------------------------------------------------------------------------------------------------------------------------------------------------------------------------------------|----------------------------------------------------------------------------------------------------------------------|-----------------------------------------------------------------------------|------------------------------------------------------------------------------------------------------------------------------------------------------------------------------------------------------------------------------------------------------------------------------------------------------------------|
|                                                                                                                                                                                                                                     | 3 times/week for 6 months (from mating until delivery)                                                               | hormone levels                                                              | <i>Study not suitable for the risk assessment</i>                                                                                                                                                                                                                                                                |
| <b>Krogenaes et al. (2014).</b> In Utero Exposure to Environmentally Relevant Concentrations of PCB 153 and PCB 118 Disrupts Fetal Testis Development in Sheep.                                                                     | PCB-118<br>49 µg/kg bw/day<br>Oral gavage (corn oil)<br>3 times/week for 6 months<br>From mating until delivery)     | Reproductive effects (testis develop)                                       | Same study as Gutleb et al. (2011); cross contamination with PCB 153; no check on impurities. PCB 118 level 200 pg TEQ/g fat, 60 in controls. No effects on testis morphology and weight. Sperm counts/viability not studied. Effects on proteome observed.<br><i>Study not suitable for the risk assessment</i> |
| <b>Brambilla et al. (2011b).</b> Polychlorodibenzodioxin and -furan (PCDD and PCDF) and Dioxin-like Polychlorobiphenyl (DL-PCB) Congener Levels in Milk of Grazing Sheep as Indicators of the Environmental Quality of Rural Areas. | 17 PCDD/Fs<br>+ 12 DL-PCBs<br><i>Field exposure</i>                                                                  | Reproductive effects<br>Milk quality                                        | No clear effects observed on fertility. Only low levels in milk and small range (0.6-2 pg WHO <sub>1998</sub> -TEQ/g fat).<br><i>Study not suitable for the risk assessment</i>                                                                                                                                  |
| <b>Iannuzzi et al. (2004).</b> Chromosome fragility in two sheep flocks exposed to dioxins during pasturage.                                                                                                                        | 17 PCDD/Fs<br><i>Field exposure</i>                                                                                  | Reproductive effects<br>Clastogenicity<br>aneugenicity                      | Levels in milk, soil and grass but low.<br>No clear data on exposure of affected group and nothing on the controls. Effects on chromosome aberrations and SCEs. Potentially other contaminants.<br><i>Study not suitable for the risk assessment</i>                                                             |
| <b>Perucatti et al. (2006).</b> Increased frequencies of both chromosome abnormalities and SCEs in two sheep flocks exposed to high dioxin levels during pasturage.                                                                 | 17 PCDD/Fs<br><i>Field exposure</i>                                                                                  | Reproductive effects<br>Chromosome abnormalities, SCE, mortality            | Levels in milk, soil and grass, but not for the controls. Effects on SCEs and chromosome abnormalities. Potentially other contaminants involved.<br><i>Study not suitable for the risk assessment</i>                                                                                                            |
| <b>Lind et al. (2009).</b> Exposure to pastures fertilised with sewage sludge disrupts bone tissue homeostasis in sheep.                                                                                                            | Many contaminants, including PCBs. Only DL-PCB 118 reported<br><i>Field exposure</i>                                 | Musculoskeletal, bone                                                       | Effect of sewage sludge treatment pasture on bone density. However, no TEQ levels determined and also mixture of contaminants.<br><i>Study not suitable for the risk assessment.</i>                                                                                                                             |
| <b>GOATS</b>                                                                                                                                                                                                                        |                                                                                                                      |                                                                             |                                                                                                                                                                                                                                                                                                                  |
| <b>Azza et al. (2014).</b> Toxicological impact of exposure to 2,3,7,8-tetrachlorodibenzo- <i>p</i> -dioxin (TCDD) on some hormonal profiles and hematological parameters in goats.                                                 | TCDD<br>0.23 µg/kg bw (equivalent to 1/3 of TCDD LD <sub>50</sub> ref to rat)<br>Oral admin, 3 doses, 2-day interval | Reproductive effects<br>Effects on hormone levels (estradiol, progesterone, | Goat (Baladi); unclear if 0.23 µg/kg bw is sum of doses or per dose; just one dose applied, being LOAEL.<br><i>Study not suitable for the risk assessment.</i>                                                                                                                                                   |

| Reference                                                                                                                                                                                 | Compounds and dose regime                                                                                                                                                                                                                                                                                                                                                                                                                                                   | Endpoint                                                        | Comments                                                                                                                                                          |
|-------------------------------------------------------------------------------------------------------------------------------------------------------------------------------------------|-----------------------------------------------------------------------------------------------------------------------------------------------------------------------------------------------------------------------------------------------------------------------------------------------------------------------------------------------------------------------------------------------------------------------------------------------------------------------------|-----------------------------------------------------------------|-------------------------------------------------------------------------------------------------------------------------------------------------------------------|
|                                                                                                                                                                                           |                                                                                                                                                                                                                                                                                                                                                                                                                                                                             | prolactin and cortisol)<br>Hematological parameters             |                                                                                                                                                                   |
| <b>Fouzy et al. (2008)</b> . Effect of dioxins on properties of Egyptian goats' milk and blood profile with relation to mastitis.                                                         | 17 PCDD/Fs<br>Mixture of native and <sup>13</sup> C, equal composition, so may calibration mixture<br>0.037, 0.077, 0.11, 0.23 µg/kg bw (equal to 1/27, 1/13, 1/6 and 1/3 of LD50 guinea pig = 0.06µg/kg bw)<br>(doses seem not correct: based on stock and LD <sub>50</sub> guinea pig: 23, 11.6, 7.7, 3.9 ng/kg bw)<br>Oral admin but different number of doses, either 1 or 3 (in 6 days): unclear when milk was collected, during or after dosing follow-up for 16 days | Immunotox<br><br>Milk and blood profile                         | Goat (Baladi); exposure poorly described with unlikely low levels in milk, not very different from controls.<br><i>Study not suitable for the risk assessment</i> |
| <b>Lundberg et al. (2006)</b> . Perinatal exposure to PCB 153, but not PCB 126, alters bone tissue composition in female goat offspring.                                                  | PCB-126<br>49 ng/kg bw/day<br>Oral admin (corn oil)<br>From GD60 until delivery (about GD150)                                                                                                                                                                                                                                                                                                                                                                               | Musculoskeletal, bone                                           | Goat (Norwegian breed); Levels in adipose tissue, plasma and liver                                                                                                |
| <b>Lyche et al. (2004b)</b> . Effects of perinatal exposure to low doses of PCB 153 and PCB 126 on lymphocyte proliferation and hematology in goat kids.                                  | PCB-126<br>49 ng/kg bw/day<br>Oral admin (corn oil)<br>From GD60 until delivery (about GD150)                                                                                                                                                                                                                                                                                                                                                                               | Immunotox<br><br>Blood cell counts                              | Goat (Norwegian breed); Levels in adipose tissue, plasma and liver                                                                                                |
| <b>Lyche et al. (2004c)</b> . Effects of gestational and lactational exposure to low doses of PCBs 126 and 153 on anterior pituitary and gonadal hormones and on puberty in female goats. | PCB-126<br>49 ng/kg bw/day<br>Oral admin (corn oil)<br>From GD60 until delivery (about GD150)                                                                                                                                                                                                                                                                                                                                                                               | Effects on hormone levels (hypothalamic-pituitary-gonadal axis) | Goat (Norwegian breed); Levels in adipose tissue, plasma and liver                                                                                                |

| Reference                                                                                                                                                                        | Compounds and dose regime                                                                     | Endpoint                                                                   | Comments                                                           |
|----------------------------------------------------------------------------------------------------------------------------------------------------------------------------------|-----------------------------------------------------------------------------------------------|----------------------------------------------------------------------------|--------------------------------------------------------------------|
| <b>Oskam et al. (2005)</b> . Effects of long-term maternal exposure to low doses of PCB126 and PCB153 on the reproductive system and related hormones of young male goat.        | PCB-126<br>49 ng/kg bw/day<br>Oral admin (corn oil)<br>From GD60 until delivery (about GD150) | Reproductive effects (including organs)<br>Effects on other hormone levels | Goat (Norwegian breed); Levels in adipose tissue, plasma and liver |
| <b>Zimmer et al. (2009)</b> . Altered Stress-Induced Cortisol Levels in Goats Exposed to Polychlorinated Biphenyls (PCB 126 and PCB 153) During Fetal and Postnatal Development. | PCB-126<br>49 ng/kg bw/day<br>Oral admin (corn oil)<br>From GD60 until delivery (about GD150) | Effects on other hormone levels<br>Stress, cortisol, organ weight          | Goat (Norwegian breed); Levels in adipose tissue, plasma and liver |
| <b>Lyche et al. (2006)</b> . Perinatal exposure to low doses of PCB 153 and PCB 126 affects maternal and neonatal immunity in goat kids.                                         | PCB-126<br>49 ng/kg bw/day<br>Oral admin (corn oil)<br>From GD60 until delivery (about GD150) | Immunotoxicity                                                             | Goat (Norwegian breed); Levels in adipose tissue, plasma and liver |

### A.11.2. Studies in pigs

**Table 89.** Studies on the adverse effects of PCDD/Fs and/or DL-PCBs in pigs

| Reference                                                                                                                                  | Compounds and dose regime                                                                                                          | Endpoint(s) | Comments                                                                                                                                                                                                                                                                                        |
|--------------------------------------------------------------------------------------------------------------------------------------------|------------------------------------------------------------------------------------------------------------------------------------|-------------|-------------------------------------------------------------------------------------------------------------------------------------------------------------------------------------------------------------------------------------------------------------------------------------------------|
| <b>Ryan (1983).</b> Higher chlorinated dioxins implicated in the mortality of young-pigs kept on a pentachlorophenol-treated wooden floor. | PCDDs<br><i>Field exposure</i>                                                                                                     | Mortality   | <i>Case report.</i> Levels of dioxins (tetra, hex, hepta and octa) in milk and tissues from two piglets (brain, liver, skin, serum)<br>Exposure route unclear and probably mixed exposure.<br><i>Study not suitable for the risk assessment.</i>                                                |
| <b>Lavrusenko et al. (1996).</b> Effect of dioxine on the immune system of farm animals.                                                   | Unclear, but probably TCDD<br>10 µg/kg<br>(10 or 30 times)<br>50 µg/kg<br>(10 or 30 times)<br>70 µg/kg<br>(10 times)<br>Oral admin | Immunotox   | <i>Same study as before with other species.</i><br>Dosing seems very high but is not very clear, and also the effects are not clearly presented. Most of the controls seem to be missing.<br>Apparently high mortality; due to treatment?<br><i>Study not suitable for the risk assessment.</i> |

### A.11.3. Studies in rabbits

**Table 90.** Studies identified on the adverse effects of PCDD/Fs and/or DL-PCBs in **rabbits**

| Reference                                                                                                                                                               | Compounds<br>Dose regime                                                                                                                                                                | Endpoint(s)                                                                                                                                                                                                                                                                            | Comments                                                                                                                                                                                                                                   |
|-------------------------------------------------------------------------------------------------------------------------------------------------------------------------|-----------------------------------------------------------------------------------------------------------------------------------------------------------------------------------------|----------------------------------------------------------------------------------------------------------------------------------------------------------------------------------------------------------------------------------------------------------------------------------------|--------------------------------------------------------------------------------------------------------------------------------------------------------------------------------------------------------------------------------------------|
| <p><b>Schwetz et al. (1973).</b> Toxicology of chlorinated dibenzo-<i>p</i>-dioxins.</p> <p>Rabbit – New Zealand albino (mixed gender)</p>                              | <p>TCDD<br/>HxCDD, OCDD for eye irritation and acnegenic activity</p> <p>Oral, <i>i.p.</i> or skin absorption:<br/>0, 31.6, 63, 126, 252, 500 µg/kg bw</p> <p>Single administration</p> | <p><b>Lethality (LD<sub>50</sub>):</b><br/>Similar for <i>i.p.</i>, oral or skin administration.<br/>Oral: 115 µg/kg<br/>Skin: 275 µg/kg</p> <p><b>Acnegenic activity:</b> certain rabbits treated <i>i.p.</i> developed skin lesions typical of those associated with acnegenens.</p> | <p>LD<sub>50</sub> calculated by Litchfield and Wilcoxon method.<br/>NOEL <i>i.p.</i> was 32 µg/kg bw<br/>There is insufficient information to be useful in the risk assessment.<br/><i>Study not suitable for the risk assessment</i></p> |
| <p><b>Fanelli et al. (1980).</b> 2,3,7,8-Tetrachlorodibenzo-<i>p</i>-dioxin toxic effects and tissue levels in animals from the contaminated area of Seveso, Italy.</p> | <p>TCDD<br/><i>Field exposure</i></p>                                                                                                                                                   | <p>Mortality, hepatic lesions</p>                                                                                                                                                                                                                                                      | <p>Levels in rabbit liver correspond fairly well to soil contamination.<br/><i>Study not suitable for the risk assessment</i></p>                                                                                                          |
| <p><b>Kimbrough et al. (1977).</b> Epidemiology and pathology of a tetrachlorodibenzodioxin poisoning episode.</p>                                                      | <p>TCDD<br/><i>Field exposure</i></p>                                                                                                                                                   | <p>Hepatotoxicity, skin lesions</p>                                                                                                                                                                                                                                                    | <p>Pathology: Microscopic hyperkeratosis was found in ear lobe (rabbit bioassay) and microscopic necrosis in liver.<br/><i>Study not suitable for the risk assessment</i></p>                                                              |



#### A.11.4. Studies in horses

**Table 91.** Studies identified on the adverse effects of PCDD/Fs and/or DL-PCBs in horses

| Reference                                                                                                                            | Compounds                                                               | Endpoint(s)                                        | Comments                                                                                                                                                                                    |
|--------------------------------------------------------------------------------------------------------------------------------------|-------------------------------------------------------------------------|----------------------------------------------------|---------------------------------------------------------------------------------------------------------------------------------------------------------------------------------------------|
| <b>Kerkvliet et al. (1992).</b> Dioxin intoxication from chronic exposure of horses to pentachlorophenol-contaminated wood shavings. | Mixture of PCDD/Fs in PCP treated wood savings<br><i>Field exposure</i> | Numerous effects, including death                  | Case report. Dioxin present as impurity and measured in fat (n=1) and liver (n=2). Study not suitable to derive a NOAEL.                                                                    |
| <b>Kimbrough et al. (1977).</b> Epidemiology and pathology of a tetrachlorodibenzodioxin poisoning episode.                          | Individual PCDD/Fs<br><i>Field exposure</i>                             | Hepatotoxicity/gastrointestinal effects, and Other | Same study as Carter et al. (1975). No additional information that can lead to NOAEL.                                                                                                       |
| <b>Carter et al. (1975).</b> Tetrachlorodibenzodioxin: an accidental poisoning episode in horse arenas.                              | TCDD (TCP)<br><i>Field exposure</i>                                     | Numerous effects                                   | Various adverse effects described including death of many horses. Levels in contaminated soil provided but level and route of exposure cannot be established; i.e. no NOAEL can be derived. |

### A.11.5. Studies in poultry

**Table 92.** Studies on the adverse effects of PCDD/DFs and/or DL-PCBs in poultry (adult birds), including chicken, quail, duck, pheasant and turkey

| Reference                                                                                                                                                                                                                              | Compounds and dose regime                                                                                                                           | Results                                                                                                                                                                                                                                                                                                                                                                                                                    | NOAEL (or LOAEL)   |
|----------------------------------------------------------------------------------------------------------------------------------------------------------------------------------------------------------------------------------------|-----------------------------------------------------------------------------------------------------------------------------------------------------|----------------------------------------------------------------------------------------------------------------------------------------------------------------------------------------------------------------------------------------------------------------------------------------------------------------------------------------------------------------------------------------------------------------------------|--------------------|
| <b>Chicken</b>                                                                                                                                                                                                                         |                                                                                                                                                     |                                                                                                                                                                                                                                                                                                                                                                                                                            |                    |
| <b>Greig et al. (1973).</b> Toxic effects of 2,3,7,8-tetrachlorodibenzo- <i>p</i> -dioxin.<br><br>White leghorn chicken (4-6 weeks old)                                                                                                | TCDD                                                                                                                                                | <b>Mortality:</b> a dose of 25-50 µg/kg killed the animals 12-21 days later.<br><b>Weight gain:</b> the weight gain was less rapid than in controls.<br><b>General condition:</b> prior to death some animals were in poor condition (laboured breathing, beak agape, feathers ruffled). Accumulation of serous fluid in the pericardial sac (post-mortem finding).                                                        |                    |
|                                                                                                                                                                                                                                        | 25-50 µg/kg<br><br>Single oral dose                                                                                                                 |                                                                                                                                                                                                                                                                                                                                                                                                                            |                    |
| <b>EI-Sabeawy et al. (2001).</b><br>Biochemical and toxic effects of 2,3,7,8-tetrachlorodibenzo- <i>p</i> -dioxin in immature male and female chickens.<br><br>Chicken                                                                 | TCDD                                                                                                                                                | <b>Body weight/wasting syndrome:</b> significant decrease in bw in immature M and F chickens 10 days after treatment with 10 and 100 µg/kg. Bw gain decrease associated with hepatomegaly in M and F. At 10 µg/kg, significant increase in liver/bw ratio (48%) only in F, and at 100 µg/kg in M.<br><b>Lipoprotein lipase (LPL) and GT activity:</b> levels of GT significantly decreased in F and M at both dose levels. | LOAEL=<br>10 µg/kg |
|                                                                                                                                                                                                                                        | 0, 10, 100 µg/kg<br><br>Single <i>i.p.</i> dose                                                                                                     |                                                                                                                                                                                                                                                                                                                                                                                                                            | 10 µgTEQ/kg        |
| <b>Sawyer et al. (1986).</b> The biologic and toxic effects of 2,3,7,8-tetrachlorodibenzo- <i>p</i> -dioxin in chickens.<br><br>White leghorn cockerels                                                                                | TCDD                                                                                                                                                | <b>Bursa of Fabricius:</b> significant involution at 10 µg/kg for 3 days compared to corn-oil treated controls.                                                                                                                                                                                                                                                                                                            | NOAEL=<br>1 µg/kg  |
|                                                                                                                                                                                                                                        | 0, 0.01, 0.1, 1.0, 10, 100, 1,000 µg/kg<br><br><i>i.p.</i> administered for 3 consecutive days. Animals sacrificed on day 5.                        |                                                                                                                                                                                                                                                                                                                                                                                                                            | 1 µg TEQ/kg        |
| <b>Peden-Adams et al. (1998).</b><br>Effects of environmentally relevant concentrations of 2,3,7,8-TCDD on domestic chicken immune function and CYP450 activity: F1 generation and egg injection studies.<br><br>White leghorn chicken | TCDD                                                                                                                                                | <b>Lymphocyte proliferation:</b> adult T-cell proliferation significantly suppressed for all dose groups (including controls) when compared to baseline levels. Adult B-cell proliferation was suppressed from baseline for all dose groups.<br><b>Egg production:</b> loss of egg production at the highest dose group after 12 days of treatment.                                                                        |                    |
|                                                                                                                                                                                                                                        | 0, 8.6, 1,700 ng per day, plus 1,700 ng per day for one month<br><br><i>i.m.</i> dosing twice weekly during 6 weeks. (These doses were estimates of |                                                                                                                                                                                                                                                                                                                                                                                                                            |                    |

| Reference                                                                                                                                                                                                                        | Compounds and dose regime                                                                           | Results                                                                                                                                                                                                                                                                                                                                                                                                                                                                                                                                                                                                                                                                                                                                                                                            | NOAEL (or LOAEL)                                                       |
|----------------------------------------------------------------------------------------------------------------------------------------------------------------------------------------------------------------------------------|-----------------------------------------------------------------------------------------------------|----------------------------------------------------------------------------------------------------------------------------------------------------------------------------------------------------------------------------------------------------------------------------------------------------------------------------------------------------------------------------------------------------------------------------------------------------------------------------------------------------------------------------------------------------------------------------------------------------------------------------------------------------------------------------------------------------------------------------------------------------------------------------------------------------|------------------------------------------------------------------------|
|                                                                                                                                                                                                                                  | potential exposure from remediated and contaminated soils at a Superfund site)                      |                                                                                                                                                                                                                                                                                                                                                                                                                                                                                                                                                                                                                                                                                                                                                                                                    |                                                                        |
| <b>Alonso et al. (1998).</b> Effects of <i>in ovo</i> exposure to 2,3,7,8-TCDD on F1 generation adult chickens ( <i>Gallus gallus</i> ).<br><br>White leghorn chickens                                                           | TCDD<br><br>0, 8.6, 1,700 ng/day<br><br><i>i.m.</i> dosing twice weekly during for 6 weeks          | <b>Egg production:</b> loss of egg production at the highest dose group after 12 days of treatment<br><b>Estradiol, testosterone and estrogen receptor levels in F1:</b> no statistically different from controls.<br><b>Body weight in F1:</b> at both dose groups F bw lower than those of M. Control had lower bw than low dose (8.6) by sex. Low dose M bw were statistically different from control M.                                                                                                                                                                                                                                                                                                                                                                                        |                                                                        |
| <b>McKinney et al. (1976).</b> Toxicological assessment of hexachlorobiphenyl isomers and 2,3,7,8 tetrachlorodibenzofuran in chicks. I. Relationship of chemical parameters.                                                     | TCDF<br><br>0, 1, 5 µg/kg/day<br><br>Oral (gastric intubation)                                      | <b>Mortality:</b> animals at the highest dose died at an average of 11.5 days.<br><b>Food consumption and body weight:</b> both reduced at the highest dose group during the 7- to 14-day observation period, and also reduced at the 1 µg/kg/day group during the 14- to 21-day period.<br><b>Liver weight:</b> no significant effect at any dose group.<br><b>Spleen weight:</b> significant reduction in spleen weight at 1 µg/kg.<br><b>Histopathology:</b> Mild changes only at the high dose group: accumulation of clear fluid (sc edema), ascites, and hydropericardium, with the severity of fluid accumulation greater at the 5 µg/kg dose. The thymus was markedly involuted at 1 µg/kg. Histologically, there was marked depletion of lymphocytic cell types in the spleen and thymus. | LOAEL= 1 µg/kg<br><br>0.1 µg<br>TEQ/kg/day                             |
| <b>Goldstein et al. (1976).</b> Toxicological assessment of hexachlorobiphenyl isomers and 2,3,7,8,-tetrachlorodibenzofuran in chicks. II. Effects on drug metabolism and porphyrin accumulation.<br><br>White leghorn cockerels | TCDF<br>0, 1, 5 µg/kg/day<br><br>PCB-169<br>100, 300 mg/kg in diet<br><br>Oral (gastric intubation) | <b>Mortality:</b> animals at the highest dose died before sacrifice.<br><b>Liver weight:</b> not significantly increased at any dose level. Incidence of hepatic porphyrin elevation.                                                                                                                                                                                                                                                                                                                                                                                                                                                                                                                                                                                                              | LOAEL = 1 µg/kg<br><br>0.1 TEQ<br>µg/kg/day<br><br>LOAEL=<br>100 mg/kg |
| <b>Schwetz et al. (1973).</b> Toxicology of chlorinated dibenzo- <i>p</i> -dioxins.<br><br>White leghorn, single-comb cockerels                                                                                                  | TCDD, HxCDDs, OCDD<br><br>Birds given TCDD at 1 and 10 µg/kg or the HxCDD at 10 and 100 µg/kg       | Chick bioassay for chick edema factor.<br>High incidence of mortality by 21 days (no survival at the highest doses), exhibiting pericardial, peritoneal, subcutaneous and pulmonary oedema as well as liver hypertrophy                                                                                                                                                                                                                                                                                                                                                                                                                                                                                                                                                                            |                                                                        |

| Reference                                                                                                                                                                                                                 | Compounds and dose regime                                                                                                                                                                                                                                                                                                | Results                                                                                                                                                                                     | NOAEL (or LOAEL)                                                                               |
|---------------------------------------------------------------------------------------------------------------------------------------------------------------------------------------------------------------------------|--------------------------------------------------------------------------------------------------------------------------------------------------------------------------------------------------------------------------------------------------------------------------------------------------------------------------|---------------------------------------------------------------------------------------------------------------------------------------------------------------------------------------------|------------------------------------------------------------------------------------------------|
|                                                                                                                                                                                                                           | Oral (gavage)                                                                                                                                                                                                                                                                                                            |                                                                                                                                                                                             |                                                                                                |
|                                                                                                                                                                                                                           | 20 or 21 days of treatment                                                                                                                                                                                                                                                                                               |                                                                                                                                                                                             |                                                                                                |
|                                                                                                                                                                                                                           | PCDDs                                                                                                                                                                                                                                                                                                                    |                                                                                                                                                                                             |                                                                                                |
| <b>Metcalfe (1972)</b> . Proposed source of chick edema factor.                                                                                                                                                           | Animals were fed contaminated fat that was then analysed                                                                                                                                                                                                                                                                 | Chick edema factor                                                                                                                                                                          |                                                                                                |
|                                                                                                                                                                                                                           | 17 PCDD/Fs (uncertain doses of individuals congeners)                                                                                                                                                                                                                                                                    |                                                                                                                                                                                             |                                                                                                |
| <b>Flick et al. (1972)</b> . Studies of the chick edema disease part 9 response of chicks fed or singly administered synthetic edema producing compounds.                                                                 | Several experiments with 1 day chicks fed or administered single oral or <i>i.p.</i> doses of mixtures                                                                                                                                                                                                                   | Cardiovascular effects, edema after 3 weeks, weight gain                                                                                                                                    |                                                                                                |
|                                                                                                                                                                                                                           | PCB-118<br>(PCBs added to diets as a mixture of 7 (PCB-28, -52, -101, -118, -138, -153, -180) 0, 1.5 and 6 ng/g diet 41 weeks                                                                                                                                                                                            | Performance, egg quality.<br>Levels in fat fraction of egg yolk, abdominal adipose tissue, thigh and breast muscle. Feed conversion and percentage of egg production were determined weekly | Seven indicator PCBs. Congener specific data provided. Only DL-PCB is PCB-118 and TEF 0.00003. |
| <b>De Vos et al. (2005)</b> . Digestibility, retention and incorporation of low-level dietary PCB contents in laying hens.                                                                                                |                                                                                                                                                                                                                                                                                                                          |                                                                                                                                                                                             |                                                                                                |
|                                                                                                                                                                                                                           | Feeding diets for 18 week chicken that contained 31–35% ocean fish and/or carp which provided concentrations analogous to 3.3 (control), 26 (low-dose) or 59 (high-dose) pg TEQs/g diet ww<br>Control diet contained PCDDs. The diets also contained high levels of NDL-PCBs and potentially other contaminants were not | Reproductive effects, Hepatotoxicity<br>Feed consumption, bw, organ weight haematocrit values                                                                                               | TEQs determined by H4IIE bioassay and calculated (different values)                            |
| <b>Summer et al. (1996a)</b> . Effects induced by feeding organochlorine-contaminated carp from Saginaw Bay, Lake Huron, to laying White Leghorn hens. I. Effects on health of adult hens, egg production, and fertility. |                                                                                                                                                                                                                                                                                                                          |                                                                                                                                                                                             |                                                                                                |

| Reference                                                                                                                                                                                       | Compounds and dose regime                                                                                                                                             | Results                                                                         | NOAEL (or LOAEL)                 |
|-------------------------------------------------------------------------------------------------------------------------------------------------------------------------------------------------|-----------------------------------------------------------------------------------------------------------------------------------------------------------------------|---------------------------------------------------------------------------------|----------------------------------|
|                                                                                                                                                                                                 | analysed.<br>8 weeks                                                                                                                                                  |                                                                                 |                                  |
| <b>Summer et al. (1996b)</b> . Effects induced by feeding organochlorine-contaminated carp from Saginaw Bay, Lake Huron, to laying White Leghorn hens. II. Embryotoxic and teratogenic effects. | TEQs                                                                                                                                                                  | Reproductive effects                                                            |                                  |
| <b>Stanton et al. (2002)</b> . Effect of estrogen and 2,3,7,8-tetrachlorodibenzo-rho-dioxin (TCDD) on plasma fatty acids of immature male chickens ( <i>Gallus domesticus</i> ).                | TCDD<br>G1: Vehicle<br>G2: Estrogen<br>G3: TCDD: 50 µg/kg bw/day<br>G4: Estrogen + TCDD: 50 µg/kg bw/day<br><i>i.p.</i>                                               | Plasma lipids and fatty acid changes                                            | Single dose study                |
| <b>Spear and Moon (1986)</b> . Thyroid-vitamin A interactions in 3 week chicks exposed to 3,4,3',4'-tetrachlorobiphenyl: influence of low dietary vitamin A and iodine.                         | PCB-77<br>10 µg/g bw<br>On days 2 and 6<br><i>i.m.</i><br>Animals maintained on experimental diets with (i) low Vit A (ii) low Vit A and low iodine and (iii) control | Metabolic rate, food intake, serum T3 and T4 decreased. Thyroid size increased. | Single dose study                |
| <b>Ax and Hansen (1975)</b> . Effects of purified polychlorinated biphenyl analogs on chicken reproduction.                                                                                     | PCB-118 and Aroclors (possible presence of PCDDs)<br>20 ppm<br>Oral (diet)<br>10 weeks + 2 weeks elimination period                                                   | Reproductive effects, fertility, embryo mortality                               | Single dose study                |
| <b>Fanelli et al. (1980)</b> . 2,3,7,8-Tetrachlorodibenzo- <i>p</i> -dioxin toxic effects and tissue levels in animals from the contaminated area of Seveso, Italy.                             | TCDD<br><br><b>Field exposure</b>                                                                                                                                     | Mortality, pathology<br>Hepatic lesions and hydrpericardia                      | Seveso area<br>Levels in tissues |

| Reference                                                                                                                                                                               | Compounds and dose regime                                                                                                    | Results                                                                      | NOAEL (or LOAEL)                            |
|-----------------------------------------------------------------------------------------------------------------------------------------------------------------------------------------|------------------------------------------------------------------------------------------------------------------------------|------------------------------------------------------------------------------|---------------------------------------------|
| Chicken                                                                                                                                                                                 |                                                                                                                              |                                                                              |                                             |
| <b>Newsome et al. (1984).</b> Chlorinated compounds in tissues raised on pentachlorophenol-contaminated litter.                                                                         | OCDD (Exposure to commercial wood shavings containing PCP)<br><br><b>Field exposure</b>                                      | Gross pathology                                                              | Levels in tissues (liver, fat, muscle)      |
| <b>Bernard et al. (2002).</b> The Belgian PCB/dioxin incident: Analysis of the food chain contamination and health risk evaluation.                                                     | PCB-118, 17 PCDD/Fs<br><br><b>Field exposure</b>                                                                             | Chick edema                                                                  | Report Belgian incident                     |
| <b>Quail</b>                                                                                                                                                                            |                                                                                                                              |                                                                              |                                             |
| <b>Boily et al. (2003a).</b> Retinoids, LRAT and REH activities in eggs of Japanese quail following maternal and <i>in ovo</i> exposures to 3,3',4,4'-tetrachlorobiphenyl.              | PCB-77<br>5 µg/g bw<br><i>i.p.</i>                                                                                           | Embryo mortality, retinol levels, maternal toxicity                          | Single dose study<br><br>Also <i>In ovo</i> |
| Japanese quail                                                                                                                                                                          |                                                                                                                              |                                                                              |                                             |
| <b>Elliott et al. (1997).</b> Comparative toxicity of polychlorinated biphenyls to Japanese quail ( <i>Coturnix c-japonica</i> ) and American kestrels ( <i>Falco sparverius</i> ).     | PCB-77<br>PCB-126<br><u>Acute</u> - Single oral doses.<br>PCB-77: 250 mg/kg<br>PCB-126: 25 mg/kg<br>Sacrificed after 5 days. | Hepatic and renal porphyrin levels                                           | Single dose study                           |
| Japanese Quail                                                                                                                                                                          |                                                                                                                              |                                                                              |                                             |
| <b>Miranda et al. (1987).</b> Effects of polychlorinated biphenyls on porphyrin synthesis and cytochrome P-450-dependent monooxygenases in small intestine and liver of Japanese quail. | PCB-77<br>300 µmol/kg<br>(87.6 mg/kg)<br>Oral admin<br>Sacrificed at 48 h                                                    | Porphyrin synthesis                                                          | Single dose study                           |
| Japanese Quail                                                                                                                                                                          |                                                                                                                              |                                                                              |                                             |
| <b>Pheasants</b>                                                                                                                                                                        |                                                                                                                              |                                                                              |                                             |
| <b>Hornung et al. (1998).</b> Lack of                                                                                                                                                   | PCB-105                                                                                                                      | <b>Egg production:</b> not significantly different between treatment groups, | None                                        |

| Reference                                                                                                                                                                      | Compounds and dose regime                                                                                                                                                           | Results                                                                                                                                                                                                                                                                                                                                                                                                                                                                                                                                                                                                                                                                                                                                                                                                                  | NOAEL (or LOAEL) |
|--------------------------------------------------------------------------------------------------------------------------------------------------------------------------------|-------------------------------------------------------------------------------------------------------------------------------------------------------------------------------------|--------------------------------------------------------------------------------------------------------------------------------------------------------------------------------------------------------------------------------------------------------------------------------------------------------------------------------------------------------------------------------------------------------------------------------------------------------------------------------------------------------------------------------------------------------------------------------------------------------------------------------------------------------------------------------------------------------------------------------------------------------------------------------------------------------------------------|------------------|
| <p>developmental and reproductive toxicity of 2,3,3',4,4'-pentachlorobiphenyl (PCB 105) in ring-necked pheasants.</p> <p>Ring-necked pheasant (<i>Phasianus colchicus</i>)</p> | <p>0, 0.06, 0.6, 6 mg/kg bw/week</p> <p>For 10 weeks after which hens were bred with untreated roosters once per week for 8 weeks</p> <p>Oral administration in gelatin capsule</p> | <p>except at week 6 of the egg-laying period when cumulative egg production in the 6 mg PCB 105/kg hen group was greater than controls.</p> <p><b>Embryo mortality and chick mortality:</b> no significantly different between treatment groups.</p> <p><b>Total body and heart weights:</b> not different between groups in chicks 1 day posthatch. Liver weights of chicks at the highest dose group were greater than controls at 1 day posthatch.</p> <p>The first chick to hatch from each hen was reared to 21 days posthatch total body, liver, and heart weights were not different between groups.</p> <p><b>Malformations:</b> no dose-related malformations of the beak or limbs.</p> <p><b>Cardiac effects:</b> No signs of sc edema, ascites, or pericardial edema in chicks at 1 or 21 days posthatch.</p> |                  |

**Table 93.** Studies on the adverse effects of PCDD/Fs and/or DL-PCBs *in ovo* in **poultry** (studies with more than one dose group)

| Reference                                                                                                                                                                                                      | Compounds and dose regime                                                           | Site of injection | Time of injection      | Conversion of dose Assuming 50 g egg | Results                                                                                                                     | NOAEL (or LOAEL)                        |
|----------------------------------------------------------------------------------------------------------------------------------------------------------------------------------------------------------------|-------------------------------------------------------------------------------------|-------------------|------------------------|--------------------------------------|-----------------------------------------------------------------------------------------------------------------------------|-----------------------------------------|
| <b>CHIKEN</b>                                                                                                                                                                                                  |                                                                                     |                   |                        |                                      |                                                                                                                             |                                         |
| <b>Peden-Adams et al. (1998).</b><br>Effects of environmentally relevant concentrations of 2,3,7,8-TCDD on domestic chicken immune function and CYP450 activity: F1 generation and egg injection studies.      | TCDD                                                                                |                   |                        |                                      |                                                                                                                             |                                         |
|                                                                                                                                                                                                                | 6 µL of 0, 20, 200 pg/mL and 2, 20, 200 ng/mL                                       |                   |                        |                                      |                                                                                                                             |                                         |
|                                                                                                                                                                                                                | F1 generation<br>n=300 eggs, 50 eggs/group<br><br>Examined at 14-day old post-hatch | Yolk sac          | not reported?          |                                      | Immunotoxicity (lymphocyte proliferation)                                                                                   | Also study in adults (see Table FARM-8) |
| <b>Ivnitski et al. (2001).</b> 2,3,7,8-tetrachlorodibenzo- <i>p</i> -dioxin (TCDD) inhibition of coronary development is preceded by a decrease in myocyte proliferation and an increase in cardiac apoptosis. | TCDD<br>0, 0.24, 0.40 pmol/egg<br><br>Fertile eggs                                  | Yolk sac          | Before incubation      | 0, 1.5, 2.5 pg/g egg                 | Both doses<br>Immunotoxicity<br>Cardiovascular effects                                                                      |                                         |
| <b>Bruggeman et al. (2005).</b><br>Effects of early prenatal exposure to 2,3,7,8-tetrachlorodibenzo- <i>p</i> -dioxin (TCDD) on postnatal reproduction in the laying hen ( <i>Gallus gallus</i> ).             | TCDD<br>0, 10, 20 ng/egg<br><br>n=1,000 eggs                                        | Yolk sac          | Embryonic day 0        | 0, 200, 400 pg/g egg                 | Hatchability and body weight gain depressed with 200 pg/g egg.<br>Reproductive effects seen in all TCDD adult hens          |                                         |
| <b>Bruggeman et al. (2003).</b><br>Embryonic exposure to 2,3,7,8-tetrachlorodibenzo- <i>p</i> -dioxin in chickens: effects of dose and embryonic stage on hatchability and growth.                             | TCDD<br>0, 8, 20, 50 ng/egg<br><br>n=600 eggs                                       | Yolk sac          | Embryonic day 4, 8, 12 | 0, 160, 400, 1,000 pg/g egg          | Metabolic effects<br>Organ weight, glucose, TG depending on dose and time.<br><br>T3/T4 ratio increased accompanied delayed |                                         |



| Reference                                                                                                                                                                                                                            | Compounds and dose regime                                                                                                                                                   | Site of injection   | Time of injection   | Conversion of dose Assuming 50 g egg                                                                                   | Results                                                                                                  | NOAEL (or LOAEL)                                                     |
|--------------------------------------------------------------------------------------------------------------------------------------------------------------------------------------------------------------------------------------|-----------------------------------------------------------------------------------------------------------------------------------------------------------------------------|---------------------|---------------------|------------------------------------------------------------------------------------------------------------------------|----------------------------------------------------------------------------------------------------------|----------------------------------------------------------------------|
|                                                                                                                                                                                                                                      | TCDD                                                                                                                                                                        |                     |                     |                                                                                                                        | growth                                                                                                   |                                                                      |
| <b>Henshel et al. (1997a)</b> . The relative sensitivity of chicken embryos to yolk- or air-cell-injected 2,3,7,8-tetrachlorodibenzo- <i>p</i> -dioxin.                                                                              | 0, 10, 100, 300, 1,000 pg/g egg - Embryos sacrificed prior to hatching<br><br>0, 10, 30, 60, 100, 300, 1,000 pg/g egg - Embryos allowed to hatch                            | Yolk sac<br>Air sac | Embryonic day 0     | 0, 10, 100, 300, 1,000 pg/g egg                                                                                        | Reproductive effects<br>Embryo lethality<br>Mortality, embryo growth                                     | NOAEL= 100 pg/g egg for embryo lethality                             |
|                                                                                                                                                                                                                                      | n=204 eggs, fertile                                                                                                                                                         |                     |                     |                                                                                                                        |                                                                                                          |                                                                      |
| <b>Powell et al. (1996)</b> . Effects of 3,3',4,4',5-pentachlorobiphenyl (PCB 126) and 2,3,7,8-tetrachlorodibenzo- <i>p</i> -dioxin (TCDD) injected into the yolks of chicken ( <i>Gallus domesticus</i> ) eggs prior to incubation. | <b>TCDD:</b> 0, 0.04, 0.08, 0.16, 0.32, 0.64 µg/kg egg ww<br><b>PCB-126:</b> 0, 0.1, 0.2, 0.4, 0.8, 1.6, 3.2, 6.4, 12.8 µg/kg egg ww<br><br>Examined within 24h of hatching | Yolk sac            | Prior to incubation | <b>TCDD:</b> 0, 40, 80, 160, 320, 640 pg/g egg<br><b>PCB-126:</b> 0, 10, 20, 40, 80, 160, 320, 640, 1,280 pg TEQ/g egg | Musculoskeletal, bone<br><br>Reproductive effects: hatching success<br><br>Body weight, lethality, edema | <b>TCDD:</b> 40 pg TEQ/g egg<br><br><b>PCB-126:</b> 160 pg TEQ/g egg |
| <b>Walker and Catron (2000)</b> . Characterization of cardiotoxicity induced by 2,3,7,8-tetrachlorodibenzo- <i>p</i> -dioxin and related chemicals during early chick embryo development.                                            | <b>TCDD:</b> 0, 0.125, 0.25, 0.5, 1.0, 2.0, 3.0 pmol/g egg dosed on day 0 and up to day 12                                                                                  | Yolk sac            | Prior to incubation | <b>TCDD:</b> 0, 40,80, 160, 320, 640, 960 pg/g egg                                                                     | Cardiovascular effects including increase in heart weight for TCDD and PCB-126.                          | <b>TCDD:</b> 40 pg/g egg                                             |
| Two strains White Leghorn chicken eggs: Babcock variety (WLB) and Plymouth Rock Barred (PRB) variety                                                                                                                                 | <b>PCB-126:</b> 0, 0.875, 1.75, 3.5, 7.0 pmol/g egg                                                                                                                         |                     |                     | <b>PCB-126:</b> 0, 28, 57, 114, 228 pg TEQ/g egg                                                                       | Other strain Plymouth Rock-Barred more sensitive.                                                        | <b>PCB-126:</b> 28 pg TEQ/g egg                                      |
| <b>Heid et al. (2001)</b> . Correlation of cardiotoxicity mediated by halogenated aromatic hydrocarbons to aryl hydrocarbon                                                                                                          | <b>TCDD:</b> 0, 0.06, 0.12, 0.24, 0.40, 0.8 pmol/g (19-258 pg/g)                                                                                                            | Yolk sac            | Prior to incubation |                                                                                                                        | Cardiovascular effects                                                                                   |                                                                      |

| Reference                                                                                                                                                                                | Compounds and dose regime                                                                                                                                                                                                                                                                                                     | Site of injection | Time of injection | Conversion of dose Assuming 50 g egg                          | Results   | NOAEL (or LOAEL)                                                             |
|------------------------------------------------------------------------------------------------------------------------------------------------------------------------------------------|-------------------------------------------------------------------------------------------------------------------------------------------------------------------------------------------------------------------------------------------------------------------------------------------------------------------------------|-------------------|-------------------|---------------------------------------------------------------|-----------|------------------------------------------------------------------------------|
| receptor activation.                                                                                                                                                                     | <p><b>PeCDD:</b> 0, 0.1, 0.2, 0.4, 0.8 pmol/g (36-285 pg/g)</p> <p><b>TCDF:</b> 0, 0.12, 0.24, 0.36, 0.48 pmol/g (37-122 pg/g)</p> <p><b>2,3,4,7,8-PeCDF:</b> 0, 0.75, 1.5, 2.0, 3.0 pmol/g (256-1023 pg/g)</p> <p><b>PCB-77:</b> 0, 2, 4, 6, 8 pmol/g (584-2336 pg/g)</p> <p>Fertile eggs, examined at incubation day 10</p> |                   |                   |                                                               |           |                                                                              |
| <p><b>Brunström (1989).</b> Toxicity of coplanar polychlorinated-biphenyls in avian embryos.</p> <p>Chicken (also duck and turkey)</p>                                                   | <p><b>PCB-118:</b> 500, 2,000, 8,000 µg/kg</p> <p><b>PCB-156:</b> 100, 500, 2,000 µg/kg</p> <p>Fertile eggs. Examined after 18 days</p>                                                                                                                                                                                       | Yolk sac          | Incubation day 5  | <p>15, 60, 120 pg TEQ/g egg</p> <p>3, 15, 60 pg TEQ/g egg</p> | Mortality | <p>NOAEL=</p> <p>PCB-118: 60 pg TEQ/g egg</p> <p>PCB-156: 3 pg TEQ/g egg</p> |
| <p><b>Brunström (1988).</b> Sensitivity of embryos from duck, goose, herring gull, and various chicken breeds to 3,3',4,4'-tetrachlorobiphenyl.</p> <p>Chicken (also duck and goose)</p> | <p>PCB-77 (purity 98%)</p> <p>0, 1 000, 5 000 µg/kg egg</p> <p>Fertile eggs</p>                                                                                                                                                                                                                                               | Yolk sac          | Incubation day 5  |                                                               | Mortality |                                                                              |
| <p><b>Brunström and Reutergardh (1986).</b> Differences in sensitivity of some avian species to the embryotoxicity of a PCB, 3,3',4,4'-</p>                                              | <p>PCB-77 (purity ≥98%)</p> <p>0.004, 0.02 mg/kg</p>                                                                                                                                                                                                                                                                          | Yolk sac          | Incubation day 5  | 0.4, 2 pg TEQ/g egg                                           | Hatching  |                                                                              |

| Reference                                                                                                                                                                                                                                                                          | Compounds and dose regime                                                                                                                 | Site of injection | Time of injection | Conversion of dose Assuming 50 g egg                                                                                            | Results                                                                                                                                                                                                                                                                                                                | NOAEL (or LOAEL)        |
|------------------------------------------------------------------------------------------------------------------------------------------------------------------------------------------------------------------------------------------------------------------------------------|-------------------------------------------------------------------------------------------------------------------------------------------|-------------------|-------------------|---------------------------------------------------------------------------------------------------------------------------------|------------------------------------------------------------------------------------------------------------------------------------------------------------------------------------------------------------------------------------------------------------------------------------------------------------------------|-------------------------|
| tetrachlorobiphenyl, injected into the eggs.<br><br>Chicken<br><br>(also pheasant and Mallard)                                                                                                                                                                                     |                                                                                                                                           |                   |                   |                                                                                                                                 |                                                                                                                                                                                                                                                                                                                        |                         |
| <b>Brunström and Lund (1988).</b><br>Differences between chick and turkey embryos in sensitivity to 3,3',4,4'-tetrachloro-biphenyl and in concentration/affinity of the hepatic receptor for 2,3,7,8-tetrachlorodibenzo- <i>p</i> -dioxin.<br><br>Chicken<br><br>(also in turkeys) | PCB-77 (≥98% purity)<br><br>0, 2, 10, 50 µg/kg egg<br><br>Experiment terminated after 18 days of incubation                               | Yolk sac          | Incubation day 5  |                                                                                                                                 | At 50 µg/kg egg all chick embryos died during incubation (a 20-fold higher dose caused 60% mortality among the turkey embryos).<br><br>At the highest doses not causing substantial mortality among the embryos, the thymus weight was significantly reduced in the chick embryos (not affected in the turkey embryos) | Levels in avian embryos |
| <b>Lipsitz et al. (1997).</b><br>Assessment of cerebral hemispheric symmetry in hatchling chickens exposed <i>in ovo</i> to polychlorinated biphenyl congeners.                                                                                                                    | <b>PCB- 77:</b> 3.0, 9.0 µg/kg egg<br><br><b>PCB-126:</b> 0.3, 0.9 µg/kg egg<br><br><b>PCB-77+PCB-126:</b> 0.09 µg/kg egg + 0.8 µg/kg egg | Yolk sac          | Incubation day 0  | Dosages based on the LD <sub>50</sub> values of PCB-77 (8.8 µg/kg egg) and PCB-126 (0.6 µg/kg egg) (as in Powell et al., 1996). | Neurotoxicity<br><br>Cerebral hemispheric symmetry may be affected by a variety of extrinsic and intrinsic factors                                                                                                                                                                                                     |                         |
| <b>de Roode et al. (2002a).</b><br>Effects of furazolidone, PCB77, PCB126, Aroclor 1248, paraquat and p,p'-DDE on transketolase activity in embryonal chicken brain.                                                                                                               | <b>PCB-126:</b> 0, 0.00115, 0.0115, 0.115 µg/egg<br><br><b>PCB-77:</b> 0, 0.015, 0.15, 0.3 µg/egg                                         | Yolk sac          | Incubation day 0  |                                                                                                                                 | Thiamine, transketolase activity                                                                                                                                                                                                                                                                                       |                         |

| Reference                                                                                                                                                 | Compounds and dose regime                                                                                                                                                                                                               | Site of injection | Time of injection | Conversion of dose Assuming 50 g egg             | Results                                                                                                                              | NOAEL (or LOAEL) |
|-----------------------------------------------------------------------------------------------------------------------------------------------------------|-----------------------------------------------------------------------------------------------------------------------------------------------------------------------------------------------------------------------------------------|-------------------|-------------------|--------------------------------------------------|--------------------------------------------------------------------------------------------------------------------------------------|------------------|
|                                                                                                                                                           | Examined in day 19                                                                                                                                                                                                                      |                   |                   |                                                  |                                                                                                                                      |                  |
| <b>Zhao et al. (1997)</b> . Inhibition of 3,3',4,4',5-pentachlorobiphenyl-induced chicken embryotoxicity by 2,2',4,4',5,5'-hexachlorobiphenyl.            | PCB-126<br>0.5, 1.0, 2.0, 3.0, 4.0, 8.0, 12.0 µg/kg<br>Fertilised eggs                                                                                                                                                                  | Yolk sac          | Incubation day 4  | 0,50, 100, 200, 300, 400, 800, 1200 pg TEQ/g egg | Reproductive effects<br>Hepatotoxicity,<br>gastrointestinal effects,<br>Lethality<br><br>Dose dependant at all doses                 |                  |
| <b>Gould et al. (1997)</b> . Effects of polychlorinated biphenyl mixtures and three specific congeners on growth and circulating growth-related hormones. | PCB-77<br>(purity >99%)<br>3, 30, 300 ng/egg<br>(converted to ppm based on the dose administered divided by the weight of the egg yolk, presumed to be 15 g): 0.0002, 0.002, 0.02 ppm<br>Fertile eggs, examined in day 17 of incubation | Yolk sac          | Incubation day 0  | 300 ng/g egg is 0.6 pg TEQ/g egg                 | Metabolic effects (thyroid function)<br><br>Effects on other hormone levels<br><br>Embryonic growth, pituitary GH content, mortality |                  |
| <b>Gould et al. (1999)</b> . Effects of polychlorinated biphenyls on thyroid hormones and liver type I monodeiodinase in the chick embryo.                | PCB-77<br>3, 30, 300 ng/egg<br>(converted to ppm based on the dose administered divided by the weight of the egg yolk (14.9 ±0.5 g): 0.0002, 0.002, 0.02 ppm<br>Fertile eggs, examined on incubation day 21                             | Yolk sac          | Incubation day 0  | 300 ng/g egg is 0.6 pg TEQ/g egg                 | Metabolic effects (thyroid function)<br>Growth                                                                                       |                  |
| <b>de Roode et al. (2002b)</b> .                                                                                                                          | Bioassay                                                                                                                                                                                                                                | Yolk sac          | Before            |                                                  | Morphological                                                                                                                        |                  |

| Reference                                                                                                                                                                         | Compounds and dose regime                                                                                                                                      | Site of injection                                       | Time of injection       | Conversion of dose Assuming 50 g egg                                      | Results                                                                                                                        | NOAEL (or LOAEL) |
|-----------------------------------------------------------------------------------------------------------------------------------------------------------------------------------|----------------------------------------------------------------------------------------------------------------------------------------------------------------|---------------------------------------------------------|-------------------------|---------------------------------------------------------------------------|--------------------------------------------------------------------------------------------------------------------------------|------------------|
| Embryotoxic potential of persistent organic pollutants extracted from tissues of guillemots ( <i>Uria aalge</i> ) from the Baltic Sea and the Atlantic Ocean.                     | 0.03, 0.3, 3 <i>bird egg equivalents</i> of contaminants/egg.<br><br>Fertilised eggs<br>Bioassay                                                               |                                                         | onset of the incubation |                                                                           | alterations bursa of Fabricius, mortality, malformations, hepatic porphyrin levels.                                            |                  |
| <b>Carro et al. (2013)</b> . Effects of an environmentally relevant polychlorinated biphenyl (PCB) mixture on embryonic survival and cardiac development in the domestic chicken. | 0, 0.03, 0.08, 0.3, 0.5, 0.7, 2.06 mg PCBs/g egg weight.<br><br>Fertile eggs, allowed to hatch at embryonic day 20                                             | Albumin                                                 | Embryonic day 0         | 0, 0.004, 0.010, 0.039, 0.064, 0.090, 0.266 ng TEQ <sub>1998</sub> /g egg | Cardiovascular effects<br>Embryo survival                                                                                      |                  |
| <b>Sechman et al. (2011)</b> . Effect of 2,3,7,8-tetrachlorodibenzo- <i>p</i> -dioxin (TCDD) on steroid concentrations in blood and gonads of chicken embryo.                     | TCDD<br><br><u>Experiment 1:</u><br>n=400 eggs<br>0, 2.5, 5, 10 ng/egg<br>At Embryonic day 7<br><br><u>Experiment 2:</u><br>n=500 eggs<br>0, 2.5, 5, 10 ng/egg | Across the chorioallantoic membrane into the albumen    | Embryonic day 7 and 6   | 50, 100, 200 pg/g egg                                                     | Hormonal activity in ovary and testis, hatchability<br><br>Variable effects depending on endpoint and not simple dose response |                  |
| <b>Henshel et al. (1997b)</b> . Brain asymmetry as a potential biomarker for developmental TCDD intoxication: A dose-response study.                                              | TCDD<br><br>0, 10, 100, 300, 1,000 pg/g egg Embryos sacrificed prior to hatching<br><br>0, 10, 30, 60, 100, 300, 1,000 pg/g egg. Embryos allowed to hatch.     | Injection through a hole in the shell above the air sac | Before incubation       | 0, 10, 100, 300, 1,000 pg/g egg                                           | Brain asymmetry<br>Observable at all doses depending on timing, brain region and doses                                         |                  |

| Reference                                                                                                                                                                                                                                                                        | Compounds and dose regime                                                                                                        | Site of injection                                                                 | Time of injection                                         | Conversion of dose Assuming 50 g egg | Results                                                                                            | NOAEL (or LOAEL)                   |
|----------------------------------------------------------------------------------------------------------------------------------------------------------------------------------------------------------------------------------------------------------------------------------|----------------------------------------------------------------------------------------------------------------------------------|-----------------------------------------------------------------------------------|-----------------------------------------------------------|--------------------------------------|----------------------------------------------------------------------------------------------------|------------------------------------|
|                                                                                                                                                                                                                                                                                  | Fertilised eggs                                                                                                                  |                                                                                   |                                                           |                                      |                                                                                                    |                                    |
|                                                                                                                                                                                                                                                                                  | TCDD                                                                                                                             |                                                                                   |                                                           |                                      |                                                                                                    |                                    |
| <b>Cheung et al. (1981).</b> Cardiovascular teratogenicity of 2,3,7,8-tetrachlorodibenzo- <i>p</i> -dioxin in the chick-embryo.                                                                                                                                                  | Control plus 9 dose levels of TCDD ranging from 0.009 to 77.5 pmol/egg<br><br>Fertile eggs, examined at day 14<br><br>n=374 eggs | Injection into the egg white through a hole at the pointed end of the shell       | Embryonic day 0                                           |                                      | Cardiovascular effects in control at 28% and 60% in highest dose.<br><br>Teratogenicity, lethality | No NOAEL                           |
| <b>Fan et al. (2000).</b> Ventricular preexcitation sensitive to flecainide in late stage chick embryo ECGs: 2,3,7,8-tetrachlorodibenzo- <i>p</i> -dioxin impairs inotropic but not chronotropic or dromotropic responses to isoproterenol and confers resistance to flecainide. | TCDD<br><br>1, 2 nmol/egg<br><br>Fertilised eggs                                                                                 | Fluids surrounding the embryo                                                     | At incubation day 16 to 18 (close to hatching at 21 days) | 6,400, 13,000 pg/g egg               | Cardiovascular ECG effects<br>Neurotoxicity                                                        | Not useful. No real dose response. |
| <b>Canga et al. (1993).</b> 2,3,7,8-tetrachlorodibenzo- <i>p</i> -dioxin increases cardiac myocyte intracellular calcium and progressively impairs ventricular contractile responses to isoproterenol and to calcium in chick-embryo hearts.                                     | TCDD<br><br>0, 1, 5 nmol<br><br>Fertilised eggs, examined at 18- to 20-day old                                                   | Fluids surrounding the embryos                                                    | Not reported                                              | 0, 6360, 3,180 pg/g egg              | Cardiovascular effects                                                                             |                                    |
| <b>Nikolaidis et al. (1988).</b> Effects of TCDD and its congeners 3,3',4,4'-tetrachloroazoxybenzene and 3,3',4,4'-tetrachlorobiphenyl on lymphoid development in the thymus of avian embryos.                                                                                   | PCB-77<br><br>100-300 µg/kg egg<br><br>Examined at day 19                                                                        | Injection via a hole in the shell outside the air chamber at the blunt end of the | Incubation day 13                                         | 10, 30 pg TEQ/g                      | Immunotoxicity of bursa cells<br>Dose response decrease in bursa size                              | LOAEL=10 pg TEQ/g                  |

| Reference                                                                                                                                                                                                                                                                  | Compounds and dose regime                                                                                                                                         | Site of injection | Time of injection                                        | Conversion of dose Assuming 50 g egg | Results                                                        | NOAEL (or LOAEL)          |
|----------------------------------------------------------------------------------------------------------------------------------------------------------------------------------------------------------------------------------------------------------------------------|-------------------------------------------------------------------------------------------------------------------------------------------------------------------|-------------------|----------------------------------------------------------|--------------------------------------|----------------------------------------------------------------|---------------------------|
|                                                                                                                                                                                                                                                                            |                                                                                                                                                                   | egg               |                                                          |                                      |                                                                |                           |
| <b>Sommer et al. (2005).</b> Early developmental 2,3,7,8-tetrachlorodibenzo- <i>p</i> -dioxin exposure decreases chick embryo heart chronotropic response to isoproterenol but not to agents affecting signals downstream of the beta-adrenergic receptor.                 | TCDD<br>0, 0.24, 0.3 pmol/egg<br>Incubation day 0<br><br>0, 0.3 pmol/egg<br>Incubation day 5                                                                      | Air sac           | Incubation day 0 and 5                                   | 0, 1.5, 1.9 pg/g egg on day          | Cardiovascular effects                                         |                           |
| <b>Wikenheiser et al. (2013).</b> Altering HIF-1 alpha Through 2,3,7,8-tetrachlorodibenzo- <i>p</i> -dioxin (TCDD) exposure affects coronary vessel development.                                                                                                           | TCDD<br>0, 1.0, 3.0 pmol/g                                                                                                                                        | Air sac           | At HH30 (6.5-7 days) and HH35 (8.5-9 days) of incubation | 0, 320, 960 pg/g egg                 | Immunotoxicity<br>Cardiovascular effects<br>Mortality          | NOAEL= 320 pg/g egg       |
| <b>Allred and Strange (1977).</b> Effects of 2,4,5-trichlorophenoxyacetic acid and 2,3,7,8-tetrachlorodibenzo- <i>p</i> -dioxin on developing chicken embryos.                                                                                                             | TCDD<br>6.65 10 <sup>-4</sup> , 6.65 10 <sup>-5</sup> , 6.65 10 <sup>-6</sup> , 6.65 10 <sup>-7</sup> mg/kg egg<br><br>Fertile eggs, examined on embryonic day 18 | Air sac           |                                                          |                                      | Liver weight, embryo viability, LD50                           |                           |
| <b>Ivnitski-Steele et al. (2005).</b> 2,3,7,8-tetrachlorodibenzo- <i>p</i> -dioxin (TCDD) inhibition of coronary vasculogenesis is mediated, in part, by reduced responsiveness to endogenous angiogenic stimuli, including vascular endothelial growth factor A (VEGF-A). | TCDD<br>0, 0.075, 0.15, 0.24, 0.3 pmol/g egg<br><br>Fertile eggs                                                                                                  | Air sac           | Incubation day 5                                         | 0, 24, 48, 76, 95 pg/g egg           | Cardiovascular effects<br>All doses decreased VEGF-A secretion |                           |
| <b>Yaeger et al. (2006a).</b> Embryonic growth and hatching implications of developmental 670-nm phototherapy and dioxin co-exposure.                                                                                                                                      | TCDD<br>0, 20, 200 ppt<br><br>Fertile eggs injected                                                                                                               | Air sac           | Prior to the start of incubation                         |                                      | Reproductive effects<br>Embryonic growth, hatching             | 670 nm light cotreatment. |

| Reference                                                                                                                                                                             | Compounds and dose regime                                                                                                                                        | Site of injection               | Time of injection                | Conversion of dose Assuming 50 g egg | Results                                                              | NOAEL (or LOAEL)         |
|---------------------------------------------------------------------------------------------------------------------------------------------------------------------------------------|------------------------------------------------------------------------------------------------------------------------------------------------------------------|---------------------------------|----------------------------------|--------------------------------------|----------------------------------------------------------------------|--------------------------|
| <b>Yeager et al. (2006b).</b> Survivorship and mortality implications of developmental 670-nm phototherapy: Dioxin co-exposure.                                                       | TCDD<br>0, 20, 200 ppt<br>Fertile eggs                                                                                                                           | Air sac                         | Prior to the start of incubation |                                      | Survival and hatching success                                        | 670 nm light cotreatment |
| <b>Yeager et al. (2006b).</b> Brief report: embryonic growth and hatching implications of developmental 670-nm phototherapy and dioxin co-exposure.                                   | TCDD<br>0, 20, 200 ppt<br>Fertile eggs                                                                                                                           | Air sac                         | Prior to the start of incubation |                                      | Reproductive effects<br>Musculoskeletal, bone<br>Liver weight/length | 670 nm light cotreatment |
| <b>Lim et al. (2008).</b> Attenuation of TCDD-induced oxidative stress by 670 nm photobiomodulation in developmental chicken kidney.                                                  | TCDD<br>0, 2, 200 pg/g egg (dose range that reflects environmental background concentrations up through approximately the LD <sub>50</sub> for chick embryo)     | Air sac (assumed as next paper) | Embryonic day 0                  | 0, 2, 200 pg/g egg                   | Renal toxicity, weight                                               |                          |
| <b>Lim et al. (2007).</b> Suppression of endogenous antioxidant enzymes by 2,3,7,8-tetrachlorodibenzo- <i>p</i> -dioxin-induced oxidative stress in chicken liver during development. | TCDD<br>0, 2, 20, 200 pg/g egg (dose range that reflects environmental background concentrations up through approximately the LD <sub>50</sub> for chick embryo) | Air sac                         | Embryonic day 0                  | 0, 2, 20, 200 pg/g egg               | Organ's weights                                                      |                          |
| <b>Henshel (1998).</b> Developmental neurotoxic effects of dioxin and dioxin-like compounds on domestic and wild avian species.                                                       | TCDD<br>0, 10, 100, 300, 1,000 pg/g egg Embryos sacrificed prior to hatching<br>0, 30, 60 pg/g egg Embryos allowed to hatch                                      | not reported?                   |                                  | 0, 10, 100, 300, 1,000 pg/g egg      | Immunotoxicity, Brain asymmetry                                      |                          |



| Reference                                                                                                                                                                                        | Compounds and dose regime                                                                | Site of injection | Time of injection   | Conversion of dose Assuming 50 g egg                                  | Results                                                                                       | NOAEL (or LOAEL)       |
|--------------------------------------------------------------------------------------------------------------------------------------------------------------------------------------------------|------------------------------------------------------------------------------------------|-------------------|---------------------|-----------------------------------------------------------------------|-----------------------------------------------------------------------------------------------|------------------------|
| <b>Fox and Grasman (1999).</b> Effects of PCB 126 on primary immune organ development in chicken embryos.<br><br>White leghorn eggs                                                              | PCB-126<br><br>0.051, 0.13, 0.32, 0.80 ng/g egg<br><br>Examined from day 0 until day 20  | Air sac           | Prior to incubation | 51, 130, 320, 800 pg/g egg<br><br>5, 13, 32, 80 pg TEQ/g egg          | Immunotoxicity (lymphoid cell numbers and viability)                                          | NOAEL= 5 pg/g egg      |
| <b>Goff et al. (2005).</b> Effects of PCB 126 on primary immune organs and thymocyte apoptosis in chicken embryos.                                                                               | PCB-126<br><br>0.05, 0.13, 0.32, 0.64, 0.80 ng/g egg                                     | Air sac           | Incubation day 0    | 50, 130, 320, 640, 800 pg/g egg<br><br>5, 13, 32, 64, 80 pg TEQ/g egg | Immunotoxicity                                                                                | NOAEL 5pg TEQ/g egg    |
| <b>Grasman and Whitacre (2001).</b> Effects of PCB 126 on thymocyte surface marker expression and immune organ development in chicken embryos.<br><br>White leghorn eggs                         | PCB-126<br><br>0, 0.051, 0.13, 0.32, 0.8 ng/g egg<br><br>Examined on day 20              | Air sac           | Before incubation   | 51, 130, 320, 800 pg/g egg<br>5, 13, 32, 80 pg TEQ/g egg              | Immunotoxicity (masses and cellularity of lymphoid organs, thymocyte phenotypes)<br>Mortality | NOAEL= 5 pg/g egg      |
| <b>McNabb et al. (2001).</b> Thyroid function in PCB-Exposed avian embryos and chicks.                                                                                                           | PCB-126<br><br>Doses up to 0.8 ng/g<br><br>Sampled on day 20 of the 21 incubation period | Air sac           | Prior to incubation | Up to 80 pg TEQ/g egg                                                 | Metabolic effects (thyroid function)                                                          |                        |
| <b>Jin et al. (2001).</b> Role of oxidative stress and antioxidant defense in 3,3',4,4',5-pentachlorobiphenyl-induced toxicity and species-differential sensitivity in chicken and duck embryos. | PCB-126<br><br>0, 0.4, 0.8, 1.2, 1.6 µg/kg egg                                           | Air sac           | Prior to incubation | 0, 40, 80, 120, 160 pg TEQ/g egg                                      | Hepatotoxicity, gastrointestinal effects. Mortality, edema, malformations                     | LOAEL= 40 pg TEQ/g egg |

| Reference                                                                                                                                                                                                                     | Compounds and dose regime                                                                                                                                                    | Site of injection  | Time of injection    | Conversion of dose Assuming 50 g egg                                                      | Results                                                                                                                                                               | NOAEL (or LOAEL)   |
|-------------------------------------------------------------------------------------------------------------------------------------------------------------------------------------------------------------------------------|------------------------------------------------------------------------------------------------------------------------------------------------------------------------------|--------------------|----------------------|-------------------------------------------------------------------------------------------|-----------------------------------------------------------------------------------------------------------------------------------------------------------------------|--------------------|
| Chicken and duck eggs                                                                                                                                                                                                         |                                                                                                                                                                              |                    |                      |                                                                                           |                                                                                                                                                                       |                    |
| <b>Lavoie et al. (2007).</b> Effect of <i>In ovo</i> exposure to an organochlorine mixture extracted from double crested cormorant eggs ( <i>Phalacrocorax auritus</i> ) and PCB 126 on immune function of juvenile chickens. | PCB-126<br>0, 0.55, 0.96, 1.38, 1.79 ng WHO <sub>1998</sub> -TEQ/egg (55 g/egg) (TEF=0.1)<br>Fertile eggs                                                                    | Air sac            | Prior to incubation  | 0, 0.1, 0.175, 0.25, 0.325 ng/g (0.01, 0.0175, 0.025, 0.0325 ng WHO-TEQ <sub>98</sub> /g) | Immunotox<br>Decreased antibody titres at all doses in resulting 28 day chicks.<br><br>Decreased thymus and bursa weights with highest dose depending on age of chick |                    |
| <b>McKernan et al. (2007).</b> Egg incubation position affects toxicity of air cell administered polychlorinated biphenyl 126 (3,3',4,4',5-pentachlorobiphenyl) in chicken ( <i>Gallus gallus</i> ) embryos.                  | PCB-126<br>0, 500, 1 000, 2 000 pg/g egg<br>Fertile eggs                                                                                                                     | Air sac            | Day 4 of development | 0, 50, 100, 200 pg TEQ/g egg                                                              | Embryonic survival, pipping, and hatching success<br>Depending on dose, position of egg affects results                                                               |                    |
| <b>Hoffman et al. (1998).</b> Comparative developmental toxicity of planar polychlorinated biphenyl congeners in chickens, American kestrels, and common terns.<br><br>White Leghorn eggs                                     | <b>PCB-126:</b> 0, 0.3, 0.5, 1.0, 3.2 ng/g<br><b>PCB-77:</b> 0, 0.12, 1.2, 6, 12 ng/g<br>Concentrations selected on the basis of initial range finders and studies of others | Air sac            | Incubation day 4     | PCB 126 0, 30,50,100 320 pg TEQ/g egg                                                     | Reproductive effects<br><br>Embryonic development                                                                                                                     |                    |
| <b>Brunström (1992).</b> Embryo lethality and induction of 7-ethoxyresorufin O-deethylase in chick embryos by polychlorinated biphenyls and polycyclic aromatic hydrocarbons having Ah receptor affinity.                     | <b>PCB-77</b><br><b>PCB-126</b><br><b>PCB-169</b><br>Dosing unclear<br>Examined 72 h later                                                                                   | Air sac            | Incubation day 7     |                                                                                           | Mortality                                                                                                                                                             |                    |
| <b>Rifkind et al. (1984).</b> Coordinate induction of                                                                                                                                                                         | PCB-77                                                                                                                                                                       | Injected through a | Incubation day 17    |                                                                                           | Histopathology<br>No plasma enzyme                                                                                                                                    | NOAEL<br>5nmol/egg |

| Reference                                                                                                                                                                                                                                                                                                                                                                      | Compounds and dose regime                                                                                                                                                                                        | Site of injection      | Time of injection   | Conversion of dose Assuming 50 g egg | Results                                                                                                                             | NOAEL (or LOAEL)             |
|--------------------------------------------------------------------------------------------------------------------------------------------------------------------------------------------------------------------------------------------------------------------------------------------------------------------------------------------------------------------------------|------------------------------------------------------------------------------------------------------------------------------------------------------------------------------------------------------------------|------------------------|---------------------|--------------------------------------|-------------------------------------------------------------------------------------------------------------------------------------|------------------------------|
| cytochrome P-448 mediated mixed function oxidases and histopathologic changes produced acutely in chick embryo liver by polychlorinated biphenyl congeners.                                                                                                                                                                                                                    | 0, 0.5, 5, 50, 500 nmol/egg                                                                                                                                                                                      | hole made in the-shell |                     |                                      | changes                                                                                                                             |                              |
| <b>Cohen-Barnhouse et al. (2011a).</b> Developmental and posthatch effects of <i>in ovo</i> exposure to 2,3,7,8-TCDD, 2,3,4,7,8-PECDF, and 2,3,7,8-TCDF in japanese quail ( <i>Coturnix japonica</i> ), common pheasant ( <i>Phasianus colchicus</i> ), and white leghorn chicken ( <i>Gallus gallus domesticus</i> ) embryos.<br><br>Chicken<br><br>(also quail and pheasant) | <b>TCDD:</b> 0, 0.049, 0.096, 0.19, 0.42, 0.77, 1.6, 3.1 pmol/g egg<br><br><b>PeCDF:</b> 0.044, 0.087, 0.14, 0.33, 0.69, 1.4, 2.5 pmol/g egg<br><br><b>TCDF:</b> 0.074, 0.15, 0.25, 0.52, 1.1, 1.8, 4 pmol/g egg | Air sac                | Prior to incubation |                                      | Reproductive effects<br><br>Deformities, changes in body and relative organ masses, organ pathology of hatchlings, embryo mortality |                              |
| <b>Cohen-Barnhouse et al. (2011b).</b> Sensitivity of Japanese Quail ( <i>Coturnix japonica</i> ), Common Pheasant ( <i>Phasianus colchicus</i> ), and White Leghorn Chicken ( <i>Gallus gallus domesticus</i> ) Embryos to <i>In Ovo</i> Exposure to TCDD, PeCDF, and TCDF.<br><br>Chicken<br><br>(also quail and pheasant)                                                   | <b>TCDD:</b> 0, 0.049, 0.096, 0.19, 0.42, 0.77, 1.6, 3.1 pmol/g egg<br><br><b>PeCDF:</b> 0.044, 0.087, 0.14, 0.33, 0.69, 1.4, 2.5 pmol/g egg<br><br><b>TCDF:</b> 0.074, 0.15, 0.25, 0.52, 1.1, 1.8, 4 pmol/g egg | Air sac                | Prior to incubation |                                      | Hatchability, embryo lethality                                                                                                      | NOAEL= 61 pg/g egg           |
| 1802 - <b>Somers et al. (1978).</b> Influence of hen dietary calcium and phosphorus on integrity of                                                                                                                                                                                                                                                                            | TCDD<br><br>Eggs sprayed with 2,4,5-T                                                                                                                                                                            |                        |                     |                                      | Eggs shell strength                                                                                                                 | 2,4,5-T measurements, but no |

| Reference                                                                                                                                                                                                                | Compounds and dose regime                                                                                                                        | Site of injection | Time of injection   | Conversion of dose Assuming 50 g egg                                                                  | Results                                                                                                                         | NOAEL (or LOAEL)                                       |
|--------------------------------------------------------------------------------------------------------------------------------------------------------------------------------------------------------------------------|--------------------------------------------------------------------------------------------------------------------------------------------------|-------------------|---------------------|-------------------------------------------------------------------------------------------------------|---------------------------------------------------------------------------------------------------------------------------------|--------------------------------------------------------|
| egg-shell as it would influence hatching success and consequences of pre-incubation 2,4,5-T spraying with and without a high TCDD level.                                                                                 | alone or 2,4,5-T + 2 ppm TCDD.                                                                                                                   |                   |                     |                                                                                                       |                                                                                                                                 | TCDD determination. Not useful for the risk assessment |
| <b>QUAIL</b>                                                                                                                                                                                                             |                                                                                                                                                  |                   |                     |                                                                                                       |                                                                                                                                 |                                                        |
| <b>Boily et al. (2003a)</b> . Retinoids, LRAT and REH activities in eggs of Japanese quail following maternal and <i>in ovo</i> exposures to 3,3',4,4'-tetrachlorobiphenyl.                                              | PCB-77<br>0.2, 1, 2 µg/g egg (10 g eggs)                                                                                                         | Yolk sac          | Incubation day 3    | 20, 100, 200 pg TEQ/g                                                                                 | Embryo mortality, retinol levels and metabolism, maternal toxicity                                                              |                                                        |
| Japanese quail                                                                                                                                                                                                           |                                                                                                                                                  |                   |                     |                                                                                                       |                                                                                                                                 |                                                        |
| <b>Boily et al. (2003b)</b> . Retinoid metabolism (LRAT, REH) in the yolk-sac membrane of Japanese quail eggs and effects of mono-ortho-PCBs.                                                                            | PCB-105<br>2, 10, 20 µg/egg, or 40, 200 400 ng/g                                                                                                 | Yolk sac          | Incubation day 3    | 1.2, 6, 12 pg TEQ/g egg                                                                               | Retinoid metabolism                                                                                                             |                                                        |
| Japanese quail                                                                                                                                                                                                           |                                                                                                                                                  |                   |                     |                                                                                                       |                                                                                                                                 |                                                        |
| <b>McMurry and Dickerson (2001)</b> . Effects of binary mixtures of six xenobiotics on hormone concentrations and morphometric endpoints of northern bobwhite quail ( <i>Colinus virginianus</i> ).                      | TCDD<br>0, 0.003, 0.01, 0.03, 0.1, 0.3 µg/kg                                                                                                     | Below the air sac |                     | 3, 10, 30, 100, 300 pg/g egg                                                                          | Effects on other hormone levels<br>Survival,                                                                                    | NOAEL= 100 pg/g egg<br>survival                        |
| Northern bobwhite quail                                                                                                                                                                                                  |                                                                                                                                                  |                   |                     |                                                                                                       |                                                                                                                                 |                                                        |
| <b>Cohen-Barnhouse et al. (2011a)</b> . Developmental and posthatch effects of <i>in ovo</i> exposure to 2,3,7,8-TCDD, 2,3,4,7,8-PECDF, and 2,3,7,8-TCDF in Japanese quail ( <i>Coturnix japonica</i> ), common pheasant | <b>TCDD:</b> 0, 0.22, 0.50, 0.75, 1.2, 2.9, 5.7, 11, 28, 37 pmol/g egg<br><b>PeCDF:</b> 0.42, 0.92, 1.8, 2.6, 5.3, 11.2, 11.3, 21, 22 pmol/g egg | Below the air sac | Prior to incubation | <b>TCDD:</b> 0, 7, 160, 240, 384, 928, 1,824, 3,520, 8,960, 11,840 pg/g egg<br><b>PeCDF:</b> TEF 0.03 | Reproductive effects<br>Deformities, changes in body and relative organ masses, organ pathology of hatchlings, embryo mortality | -                                                      |

| Reference                                                                                                                                                                                                                                                                                                                              | Compounds and dose regime                                                                                                                                                                                                          | Site of injection | Time of injection   | Conversion of dose Assuming 50 g egg                                        | Results                                                                                                                                        | NOAEL (or LOAEL)                                 |
|----------------------------------------------------------------------------------------------------------------------------------------------------------------------------------------------------------------------------------------------------------------------------------------------------------------------------------------|------------------------------------------------------------------------------------------------------------------------------------------------------------------------------------------------------------------------------------|-------------------|---------------------|-----------------------------------------------------------------------------|------------------------------------------------------------------------------------------------------------------------------------------------|--------------------------------------------------|
| ( <i>Phasianus colchicus</i> ), and white leghorn chicken ( <i>Gallus gallus domesticus</i> ) embryos.<br><br>Japanese quail<br><br>(also pheasant and chicken)                                                                                                                                                                        | <b>TCDF:</b> 0.42, 0.63, 1.6, 2.9, 4.8, 7.9, 8.6, 15, 24, 31 pmol/g egg                                                                                                                                                            |                   |                     | <b>TCDF:</b><br>TEF 0.1                                                     |                                                                                                                                                |                                                  |
| <b>Cohen-Barnhouse et al. (2011b)</b> . Sensitivity of Japanese Quail ( <i>Coturnix japonica</i> ), Common Pheasant ( <i>Phasianus colchicus</i> ), and White Leghorn Chicken ( <i>Gallus gallus domesticus</i> ) Embryos to <i>In Ovo</i> Exposure to TCDD, PeCDF, and TCDF.<br><br>Japanese quail<br><br>(also pheasant and chicken) | <b>TCDD:</b> 0, 022, 0.50, 0.75, 1.2, 2.9, 5.7, 11, 28, 37 pmol/g egg<br><br><b>PeCDF:</b> 0.42, 0.92, 1.8, 2.6, 5.3, 11.2, 11.3, 21, 22 pmol/g egg<br><br><b>TCDF:</b> 0.42, 0.63, 1.6, 2.9, 4.8, 7.9, 8.6, 15, 24, 31 pmol/g egg | Below the air sac | Prior to incubation | <b>TCDD:</b> 0, 7, 160, 240, 384, 928, 1,824, 3,520, 8,960, 11,840 pg/g egg | Hatchability, embryo lethality                                                                                                                 | NOAEL<br><br>TCDD: 1,824 pg/g egg                |
| <b>DUCKS</b>                                                                                                                                                                                                                                                                                                                           |                                                                                                                                                                                                                                    |                   |                     |                                                                             |                                                                                                                                                |                                                  |
| <b>Brunström (1989)</b> . Toxicity of coplanar polychlorinated-biphenyls in avian embryos.<br><br>Duck<br>(also chicken and turkeys)                                                                                                                                                                                                   | No clear reporting of the dosing                                                                                                                                                                                                   | Yolk sac          | Incubation day 5    |                                                                             | Mortality                                                                                                                                      |                                                  |
| <b>Brunström (1988)</b> . Sensitivity of embryos from duck, goose, herring gull, and various chicken breeds to 3,3',4,4'-tetrachlorobiphenyl.<br><br>Duck (local duck suppliers)<br>(also chicken and goose)                                                                                                                           | PCB-77 (purity 98%)<br><br>0, 1,000, 5,000 µg/kg egg                                                                                                                                                                               | Yolk sac          | Incubation day 5    | 0, 1,000, 5,000 ng/g egg                                                    | No embryo mortality or pericardial toxicity at highest dose for duck or goose. Diiffcult to assess useful true NOAEL without dose relationship | NOAEL=<br>5,000 ng/g egg<br><br>500 pg TEQ/g egg |

| Reference                                                                                                                                                                                                                                                                | Compounds and dose regime                                                                                        | Site of injection | Time of injection     | Conversion of dose Assuming 50 g egg | Results                                                                                                                                                                                                                                                                                                                                        | NOAEL (or LOAEL)                                   |
|--------------------------------------------------------------------------------------------------------------------------------------------------------------------------------------------------------------------------------------------------------------------------|------------------------------------------------------------------------------------------------------------------|-------------------|-----------------------|--------------------------------------|------------------------------------------------------------------------------------------------------------------------------------------------------------------------------------------------------------------------------------------------------------------------------------------------------------------------------------------------|----------------------------------------------------|
| <b>Brunström and Reutergårdh (1986)</b> . Differences in sensitivity of some avian species to the embryotoxicity of a PCB, 3,3',4,4'-tetrachlorobiphenyl, injected into the eggs.<br><br>Mallard<br>(also pheasant and chicken)                                          | PCB-77<br>(purity ≥98%)<br><br>0.1 mg/kg egg                                                                     | Yolk sac          | Incubation day 4 or 5 | 100 ng/g egg Mallard                 | Mallard single dose 100 ng/g no effect                                                                                                                                                                                                                                                                                                         | NOAEL=<br>100 ng/g egg<br><br>10 pg TEQ/g egg      |
| <b>TURKEY</b>                                                                                                                                                                                                                                                            |                                                                                                                  |                   |                       |                                      |                                                                                                                                                                                                                                                                                                                                                |                                                    |
| <b>Brunström (1989)</b> . Toxicity of coplanar polychlorinated-biphenyls in avian embryos.<br><br>Turkey<br>(also chicken and duck)                                                                                                                                      | PCB-126<br><br>0, 20, 60 µg/kg egg                                                                               | Yolk sac          | Incubation day 5      | 0, 20, 60 ng/g egg                   | Significant mortality at lower dose                                                                                                                                                                                                                                                                                                            | LOEL= 20 ng/g egg                                  |
| <b>Brunström and Lund (1988)</b> . Differences between chick and turkey embryos in sensitivity to 3,3',4,4'-tetrachloro-biphenyl and in concentration/affinity of the hepatic receptor for 2,3,7,8-tetrachlorodibenzo- <i>p</i> -dioxin.<br><br>Turkey<br>(also chicken) | PCB-77 (purity ≥98%)<br><br>0, 40, 200, 1,000 µg/kg egg<br><br>Experiment terminated after 24 days of incubation | Yolk sac          | Incubation day 5      | 0, 40, 200, 1000 ng/g egg            | At 50 µg/kg egg all chick embryos died during incubation, while a 20-fold higher dose caused 60% mortality among the turkey embryos.<br><br><i>At the highest doses not causing substantial mortality among the embryos, the thymus weight was significantly reduced in the chick embryos, while it was not affected in the turkey embryos</i> | NOAEL= 200 ng/g egg<br><br>Levels in avian embryos |
| <b>PHEASANT</b>                                                                                                                                                                                                                                                          |                                                                                                                  |                   |                       |                                      |                                                                                                                                                                                                                                                                                                                                                |                                                    |
| <b>Cohen-Barnhouse et al. (2011a)</b> . Developmental and                                                                                                                                                                                                                | <b>TCDD:</b> 0, 0.075, 0.1, 0.22, 0.31, 0.82, 3.2, 6.7 pmol/g                                                    | Air cell          | Prior to              |                                      | Reproductive effects                                                                                                                                                                                                                                                                                                                           | Concentrations available in                        |

| Reference                                                                                                                                                                                                                                                                                            | Compounds and dose regime                                                                                                                                                                                                                             | Site of injection   | Time of injection   | Conversion of dose Assuming 50 g egg                                                                                                                                                                                 | Results                                                                                                                                                                                                                              | NOAEL (or LOAEL)                |
|------------------------------------------------------------------------------------------------------------------------------------------------------------------------------------------------------------------------------------------------------------------------------------------------------|-------------------------------------------------------------------------------------------------------------------------------------------------------------------------------------------------------------------------------------------------------|---------------------|---------------------|----------------------------------------------------------------------------------------------------------------------------------------------------------------------------------------------------------------------|--------------------------------------------------------------------------------------------------------------------------------------------------------------------------------------------------------------------------------------|---------------------------------|
| <p>posthatch effects of <i>in ovo</i> exposure to 2,3,7,8-TCDD, 2,3,4,7,8-PeCDF, and 2,3,7,8-TCDF in japanese quail (<i>Coturnix japonica</i>), common pheasant (<i>Phasianus colchicus</i>), and white leghorn chicken (<i>Gallus gallus domesticus</i>) embryos.</p> <p>Common pheasant</p>        | <p>egg</p> <p><b>2,3,4,7,8-PeCDF:</b> 0.14, 0.24, 0.39, 0.6, 1.1, 4.1, 6.8 pmol/g egg</p> <p><b>TCDF:</b> 0.13, .017, 0.29, 0.65, 1.1, 4.8, 14 pmol/g egg</p> <p>80 eggs/dose group</p>                                                               |                     | incubation          |                                                                                                                                                                                                                      | <p>Deformities, changes in body and relative organ masses, organ pathology of hatchlings, embryo mortality</p> <p>Less sensitive than chicken</p>                                                                                    | ng/g egg                        |
| <p><b>Cohen-Barnhouse et al. (2011b).</b> Sensitivity of Japanese Quail (<i>Coturnix japonica</i>), Common Pheasant (<i>Phasianus colchicus</i>), and White Leghorn Chicken (<i>Gallus gallus domesticus</i>) Embryos to <i>In Ovo</i> Exposure to TCDD, PeCDF, and TCDF.</p> <p>Common pheasant</p> | <p><b>TCDD:</b> 0, 0.075, 0.1, 0.22, 0.31, 0.82, 3.2, 6.7 pmol/g egg</p> <p><b>2,3,4,7,8-PeCDF:</b> 0.14, 0.24, 0.39, 0.6, 1.1, 4.1, 6.8 pmol/g egg</p> <p><b>TCDF:</b> 0.13, .017, 0.29, 0.65, 1.1, 4.8, 14 pmol/g egg</p> <p>80 eggs/dose group</p> | Air cell            | Prior to incubation | <p><b>TCDD:</b> 0, 0.075, 0.1, 0.22, 0.31, 0.82, 3.2, 6.7 pmol/g egg</p> <p><b>PeCDF:</b> 0.14, 0.24, 0.39, 0.6, 1.1, 4.1, 6.8 pmol/g egg</p> <p><b>TCDF:</b> 0.13, 0.017, 0.029, 0.065, 1.1, 4.8, 14 pmol/g egg</p> | <p>Hatchability, embryo lethality</p> <p>TCDD less potent in quail and pheasant than PCDF and TCDF</p>                                                                                                                               |                                 |
| <p><b>Nosek et al. (1993).</b> Embryotoxicity of 2,3,7,8-tetrachlorodibenzo-<i>p</i>-dioxin in the ring-necked pheasant.</p> <p>Ring-necked pheasant</p>                                                                                                                                             | <p>TCDD</p> <p>0, 0.01, 0.1, 1, 10, 100, 1,000, 10,000, 100,000 pg/g egg</p>                                                                                                                                                                          | Albumin<br>Yolk sac | Embryonic day 0     | 0, 0.01, 0.1, 1, 10, 100, 1,000, 10,000, 100,000 pg/g egg                                                                                                                                                            | <p>LD<sub>50</sub> injected into the albumin: 1,354 pg TCDD/g egg</p> <p>LD<sub>50</sub> injected into the yolk: 2,182 pg TCDD/g egg,</p> <p>Doses up to and 1,000 pg/g egg had no effect in body growth, organ weights, carcass</p> | NOAEL estimated as 100 pg/g egg |

| Reference                                                                                                                                                                                                                           | Compounds and dose regime                                                                                | Site of injection | Time of injection          | Conversion of dose Assuming 50 g egg | Results                                                                                                                                                                                                                                                                                                    | NOAEL (or LOAEL) |
|-------------------------------------------------------------------------------------------------------------------------------------------------------------------------------------------------------------------------------------|----------------------------------------------------------------------------------------------------------|-------------------|----------------------------|--------------------------------------|------------------------------------------------------------------------------------------------------------------------------------------------------------------------------------------------------------------------------------------------------------------------------------------------------------|------------------|
|                                                                                                                                                                                                                                     |                                                                                                          |                   |                            |                                      | <p>morphometrics, incidence of edema, incidence of histological alterations in the liver, spleen, heart, Bursa of Fabricius, or thymus.</p> <p>At 1,000 pg/g egg, no effect on cardiac morphometrics, cardiac malformations (1-d-old hatchlings), or on antibody-mediated immunity (28-day old chicks)</p> |                  |
| <p><b>Brunström and Reutergårdh (1986).</b> Differences in sensitivity of some avian species to the embryotoxicity of a PCB, 3,3',4,4'-tetrachlorobiphenyl, injected into the eggs.</p> <p>Phaesant (also maillard and chicken)</p> | <p>PCB-77 (purity ≥98%)</p> <p>Highest dose: 1.0 mg/kg egg<br/>Dosing unclear</p> <p>Fertilised eggs</p> | Yolk sac          | After 4 days of incubation | 100 and 1000 pg/g egg                | Zero hatching at high dose in pheasant                                                                                                                                                                                                                                                                     |                  |
| <b>GOOSE</b>                                                                                                                                                                                                                        |                                                                                                          |                   |                            |                                      |                                                                                                                                                                                                                                                                                                            |                  |
| <p><b>Brunström (1988).</b> Sensitivity of embryos from duck, goose, herring gull, and various chicken breeds to 3,3',4,4'-tetrachlorobiphenyl.</p> <p>Goose (also chicken and duck)</p>                                            | <p>PCB-77</p> <p>0, 100, 1,000 µg/kg egg</p>                                                             | Yolk sac          | Incubation day 5           | 0, 100, 1,000 ng/g egg               | No mortality or gross abnormalities at highest dose                                                                                                                                                                                                                                                        |                  |



### A.11.6. Studies in fish

**Table 94.** Studies on the adverse effects of PCDD/Fs and/or DL-PCBs in trout

| Reference                                                                                                                                                                                                                                                                                                                                                                                                                                     | Compounds<br>Dosed regime                                                                                                                                                                | Parameters measured and measure of effect                                                                                                                                                                                                                                                                                                                                                                                                                                                                                                                                                                                                                                                                                                                                                                                                                                                                                                                       | NOAEL (or<br>LOAEL)                                                                  |
|-----------------------------------------------------------------------------------------------------------------------------------------------------------------------------------------------------------------------------------------------------------------------------------------------------------------------------------------------------------------------------------------------------------------------------------------------|------------------------------------------------------------------------------------------------------------------------------------------------------------------------------------------|-----------------------------------------------------------------------------------------------------------------------------------------------------------------------------------------------------------------------------------------------------------------------------------------------------------------------------------------------------------------------------------------------------------------------------------------------------------------------------------------------------------------------------------------------------------------------------------------------------------------------------------------------------------------------------------------------------------------------------------------------------------------------------------------------------------------------------------------------------------------------------------------------------------------------------------------------------------------|--------------------------------------------------------------------------------------|
| <p><b>Giesy et al. (2002).</b> Effects of chronic dietary exposure to environmentally relevant concentrations to 2,3,7,8-tetrachlorodibenzo-<i>p</i>-dioxin on survival, growth, reproduction and biochemical responses of female rainbow trout (<i>Oncorhynchus mykiss</i>).</p> <p>Rainbow trout (<i>Oncorhynchus mykiss</i>)<br/>Juveniles and adults (F)</p> <p>(Other results from this study are published in Walter et al. (2000))</p> | <p>TCDD</p> <p>Average daily concentrations:<br/>0, 1.8, 18, 90 ng/kg ww feed</p> <p>320 days</p> <p>Oral (via feed)</p>                                                                 | <p><b>Reproductive outcomes:</b><br/>All fish in the control group died due to pump failure so there were no outcomes for this group.</p> <ul style="list-style-type: none"> <li>- Survival of eggs to hatching: significantly reduced in all TCDD-exposed groups compared to the surrogate control group.</li> <li>- Survival of fry: significantly lower in the 18 and 90 ng TCDD/kg groups compared to the 18 ng TCDD/kg and control group.</li> </ul> <p>No treatment-related effects on egg quality, size or number</p> <p><b>Clinical- and gross pathology, histopathological examinations:</b><br/>No significant changes in gross pathology, in serum chemistry, or in erythrocyte parameters at any exposure level or duration. Dose-related hepatocellular changes seen in all TCDD-exposed groups but not in the control fish.</p> <p><b>Adult mortality:</b> 14.3, 25.7 and 40% in the 1.8, 18 and 90 ng TCDD/kg exposure groups, respectively.</p> | <p>NOAEL not established (lack of suitable control group and limited statistics)</p> |
| <p><b>Hawkes and Norris (1977).</b> Chronic oral toxicity of 2,3,7,8-tetrachlorodibenzo-<i>p</i>-dioxin (TCDD) to rainbow-trout.</p> <p>Rainbow trout (<i>Oncorhynchus mykiss</i>)<br/>Juveniles</p>                                                                                                                                                                                                                                          | <p>TCDD</p> <p>0.0023 µg/kg, 2.3 µg/kg or 2,300 µg/kg diet</p> <p>(reported to correspond to doses of 0.0000096, 0.0108 or 6.3 µg TCDD/kg bw/day)</p> <p>105 days</p> <p>Oral (feed)</p> | <p><b>Chronic oral toxicity:</b></p> <ul style="list-style-type: none"> <li>- Growth: no effects</li> <li>- Mortality: highest treatment group had 88% mortality following 71 days of exposure</li> </ul> <p><b>Mortality, food consumption, growth, fin erosion:</b> no effects in the lowest or middle TCDD groups. In the highest TCDD group, average mortality of 50% and 88% after 61 and 71 days, respectively. Feeding activity and growth reduced, and fin erosion and liver pathology increased.</p>                                                                                                                                                                                                                                                                                                                                                                                                                                                   | <p>NOAEL=0.0108 µg TCDD/kg bw</p> <p>LOAEL=6.3 µg TCDD/kg bw</p>                     |
| <p><b>Spitsbergen et al. (1988a).</b> Morphologic lesions and acute toxicity in rainbow trout (<i>Salmo gairdneri</i>) treated with 2,3,7,8-tetrachlorodibenzo-<i>p</i>-dioxin</p>                                                                                                                                                                                                                                                            | <p>TCDD</p> <p>Acute toxicity experiment:</p>                                                                                                                                            | <p><b>Mortality:</b> no mortality after 80 days in the control or 1 µg/kg. Mortality was 20, 90 and 95% in the 5, 25 and 125 µg/kg bw groups, respectively.</p> <p>80 day LD<sub>50</sub>=10 µg/kg.</p>                                                                                                                                                                                                                                                                                                                                                                                                                                                                                                                                                                                                                                                                                                                                                         | <p>NOAEL not established (limited statistics)</p>                                    |

| Reference                                                                                                                                                                                                                                                                                              | Compounds<br>Dosed regime                                                                                                                     | Parameters measured and measure of effect                                                                                                                                                                                                                                                                                                                                                                                                                                                                                                                                                                       | NOAEL (or<br>LOAEL)                        |
|--------------------------------------------------------------------------------------------------------------------------------------------------------------------------------------------------------------------------------------------------------------------------------------------------------|-----------------------------------------------------------------------------------------------------------------------------------------------|-----------------------------------------------------------------------------------------------------------------------------------------------------------------------------------------------------------------------------------------------------------------------------------------------------------------------------------------------------------------------------------------------------------------------------------------------------------------------------------------------------------------------------------------------------------------------------------------------------------------|--------------------------------------------|
| Rainbow trout ( <i>Oncorhynchus mykiss</i> )<br>Juveniles                                                                                                                                                                                                                                              | 0, 1, 5, 25, 125 µg TCDD/kg bw<br>Experiments for histopathology<br>and haematology:<br>0, 0.1, 1, 10 µg TCDD/kg bw<br><br><i>i.p.</i> single | <b>Histopathology:</b> reduced density of leucocytes and thrombocytes in fish treated with 1 or 10 µg/kg, results not given for 0.1 µg/kg bw group. Gross and microscopic lesions in fish treated with 10 µg/kg, not in fish treated with 0.1 or 1 µg/kg                                                                                                                                                                                                                                                                                                                                                        |                                            |
| <b>Spitsbergen et al. (1988b).</b> Effects of 2,3,7,8-tetrachlorodibenzo- <i>p</i> -dioxin (TCDD) or aroclor-1254 on the resistance of rainbow-trout, <i>salmo-gairdneri richardson</i> , to infectious hematopoietic necrosis virus.<br><br>Rainbow trout ( <i>Oncorhynchus mykiss</i> )<br>Juveniles | TCDD<br><br>0, 0.1, 1, 10 µg TCDD/kg<br><br><i>i.p.</i> single                                                                                | <b>Growth, mortality, morphologic lesions:</b> No mortality observed five weeks after treatment. Reduced feed intake and activity, and fin necrosis (which was not observed in any of the other groups) at the highest dose.<br>After challenge with infectious haematopoietic necrosis virus (IHNV): mortality in TCDD-exposed fish not significantly different from the control group (although more severe and diffuse lesions of IHNV disease in fish in the exposed groups versus controls).                                                                                                               | NOAEL (fin necrosis)=0.1 µg TCDD/kg bw     |
| <b>Van der Weiden et al. (1992).</b> Concurrence of p450-1a1 induction and toxic effects after administration of a low-dose of 2,3,7,8 (TCDD) in the rainbow trout ( <i>Oncorhynchus mykiss</i> )<br><br>Rainbow trout ( <i>Oncorhynchus mykiss</i> )<br>Juveniles                                     | TCDD<br><br>0.006, 0.03, 0.06, 0.30, 0.60 3.06 µg TCDD/kg bw<br><br><i>i.p.</i> single<br><br>Killed after 3, 6 or 12 weeks                   | <b>Growth:</b> reduced at the highest dose group 6 weeks after exposure.<br><b>Mortality:</b> 20% mortality in the highest dose group after 12 weeks.<br><b>Haemorrhages:</b> in 3 highest dose groups (0.30, 0.60, 3.06 µg/kg bw) after 6 weeks of treatment.<br><b>Organ weight:</b> no pronounced changes in relative liver weight. Relative spleen weight increased after 3 and 6 weeks of treatment.<br><b>Histopathology:</b> inflammation, single cell necrosis, sinusoidal dilatation of the liver.<br><b>Immunotoxicity:</b> Lymphocyte depletion and congestion observed from 0.30 µg/kg dose levels. | NOAEL (growth)=0.6 µg TCDD/kg bw           |
| <b>Walter et al. (2000).</b> Pathologic alterations in adult rainbow trout, <i>Oncorhynchus mykiss</i> , exposed to dietary 2,3,7,8-tetrachlorodibenzo- <i>p</i> -dioxin.<br><br>Rainbow trout ( <i>Oncorhynchus mykiss</i> )<br>Adults (F)                                                            | TCDD<br><br>0, 1.8, 18, 90 ng/kg diet<br><br>Oral (feed)<br><br>50, 100, 150, 200, 250+ days                                                  | <b>Reproductive effects:</b> The proportion of primary to secondary oocytes varied among fish but was not associated with any dose group, time interval or other histopathological alteration.<br><b>Hepatotoxicity:</b> dose-related hepatocellular changes in all TCDD treated groups but not in control fish.<br><b>Clinical pathology:</b> No TCDD-related alterations in any serum chemistry parameters or in erythrocyte parameters at any exposure time. Total number of leukocytes decreased in the                                                                                                     | NOAEL not established (limited statistics) |

| Reference                                                                                                                                                                                                                                       | Compounds<br>Dosed regime                                                                               | Parameters measured and measure of effect                                                                                                                                                                                                                                                                                                                                                                                                                                                                                                                                                                                                                                            | NOAEL (or<br>LOAEL)                                                                 |
|-------------------------------------------------------------------------------------------------------------------------------------------------------------------------------------------------------------------------------------------------|---------------------------------------------------------------------------------------------------------|--------------------------------------------------------------------------------------------------------------------------------------------------------------------------------------------------------------------------------------------------------------------------------------------------------------------------------------------------------------------------------------------------------------------------------------------------------------------------------------------------------------------------------------------------------------------------------------------------------------------------------------------------------------------------------------|-------------------------------------------------------------------------------------|
| (Part of the study by Giesy et al., (2002))                                                                                                                                                                                                     |                                                                                                         | highest dose compared to controls (no clear dose-response).<br><b>Gross pathology:</b> necrosis of the caudal and occasionally anal fins. Incidence of fin lesions slightly greater in treated groups than in the controls at the same time intervals (not dose dependent).<br><b>Histopathology:</b> inflammation, fibroblasts and neovascularization increased. Changes not dose-related and occurred with similar frequency among all treatment groups.<br><b>Growth:</b> no statistically significant differences in growth among treatment groups after 200 days of exposure.                                                                                                   |                                                                                     |
| <b>Brown et al. (2002).</b> Dietary accumulation and biochemical responses of juvenile rainbow trout ( <i>Oncorhynchus mykiss</i> ) to 3,3',4,4',5-pentachlorobiphenyl (PCB 126).<br><br>Rainbow trout ( <i>Oncorhynchus mykiss</i> ) Juveniles | PCB-126<br><br>0, 12.4, 126 µg/kg ww<br><br>Oral (feed)<br><br>For 30 days, plus 160 days of clean food | <b>Liver and thyroid histology:</b> not affected after 30 days of exposure. Significantly lower didehydroretinol, didehydroretinyl palmitate and tocopherol levels in fish exposed to 126 ng/g than in control fish. Significantly lower muscle T3 and T4 levels in both exposed groups compared to control fish.<br><b>Growth:</b> not affected after 30 days of exposure.                                                                                                                                                                                                                                                                                                          | NOAEL=126 µg PCB-126/kg feed (highest level tested)                                 |
| <b>Bellehumeur et al. (2016).</b> Exposure to sublethal levels of PCB-126 impacts fuel metabolism and swimming performance in rainbow trout.<br><br>Rainbow trout ( <i>Oncorhynchus mykiss</i> ) Adult (F)                                      | PCB-126<br><br>0, 100, 400 µg/kg bw<br><br><i>i.p.</i> single                                           | <b>Swimming performance:</b> Assessed after 1, 3, 5, 7 or 9 days following <i>i.p.</i> injection. Highest for fish in the high dose group, although their initial condition factor was also higher, largely due to their greater body mass. Trout in the high and low dose groups showed impaired recovery following intense exercise as they swam comparatively poorly when provided a second challenge.<br><b>Spleen somatic indices:</b> reduced in all groups.<br><b>Muscle glucose, glycogen contents:</b> reduced in all groups.<br><b>Plasma cortisol, glucose levels:</b> elevated in all groups (indicating higher metabolic costs during recovery and muscle restoration). | NOAEL not established (difference in fish size in groups at the start of the study) |
| <b>Kleeman et al. (1988).</b> Species differences in 2,3,7,8-tetrachlorodibenzo- <i>p</i> -dioxin toxicity and biotransformation in fish.<br><br>Rainbow trout ( <i>Oncorhynchus mykiss</i> )                                                   | TCDD<br><br>0, 1, 5, 25, 125 µg/kg bw<br><br><i>i.p.</i>                                                | <b>Lethality:</b> 80-day LD <sub>50</sub> (median, 95 CI)=10 (7-15) µg/kg<br><b>Body weight gain:</b> significant decrease at all doses greater than 1 µg/kg.<br><b>Fin necrosis:</b> observed at the two highest dose groups.                                                                                                                                                                                                                                                                                                                                                                                                                                                       | Based on growth in rainbow trout, NOAEL=1 µg TCDD/kg bw                             |

| Reference                                                                                                                                                                                                                                                                                                                      | Compounds<br>Dosed regime                                                                                                                                                                          | Parameters measured and measure of effect                                                                                                                                                                                                                                                                                                     | NOAEL (or<br>LOAEL)                                        |
|--------------------------------------------------------------------------------------------------------------------------------------------------------------------------------------------------------------------------------------------------------------------------------------------------------------------------------|----------------------------------------------------------------------------------------------------------------------------------------------------------------------------------------------------|-----------------------------------------------------------------------------------------------------------------------------------------------------------------------------------------------------------------------------------------------------------------------------------------------------------------------------------------------|------------------------------------------------------------|
| <p><b>Quabius et al. (2000).</b> Influence of dietary exposure to polychlorinated biphenyl 126 and nutritional state on stress response in tilapia (<i>Oreochromis mossambicus</i>) and rainbow trout (<i>Oncorhynchus mykiss</i>).</p> <p>Trout (<i>Oncorhynchus mykiss</i>)<br/>Tilapia (<i>Oreochromis mossambicus</i>)</p> | <p>PCB-126<br/>0, 25, 2,500 µg/kg food/day<br/>(approximately 0, 0.5, 50 mg/kg<br/>bw per day)</p> <p>Oral (feed)</p> <p>Examination after 5 days exposure<br/>or after 3 weeks of starvation.</p> | <p><b>Mortality:</b> no mortality.<br/><b>Behavior:</b> no changes observed.<br/><b>Food consumption:</b> no changes observed.<br/><b>Resting plasma ACTH and cortisol levels:</b> not affected by treatment.<br/><b>Resting plasma glucose:</b> affected only in fish sampled at the end of the starvation period (both doses in trout).</p> | <p>NOAEL=50<br/>mg/kg bw<br/>(highest dose<br/>tested)</p> |
| <p><b>Belpaeme (1996).</b> Cytogenetic studies of PCB77 on brown trout (<i>Salmo trutta fario</i>) using the micronucleus test and the alkaline comet assay.</p> <p>Brown trout (<i>Salmo trutta</i>)<br/>Juveniles</p>                                                                                                        |                                                                                                                                                                                                    |                                                                                                                                                                                                                                                                                                                                               | <p>Waterborne<br/>exposure</p>                             |
| <p><b>Helder (1981).</b> Effects of 2,3,7,8-tetrachlorodibenzo-dioxin (TCDD) on early life stages of rainbow trout (<i>Salmo gairdneri</i>, Richardson).</p> <p>Rainbow trout (<i>Oncorhynchus mykiss</i>)<br/>Juveniles</p>                                                                                                   |                                                                                                                                                                                                    |                                                                                                                                                                                                                                                                                                                                               | <p>Waterborne<br/>exposure</p>                             |
| <p><b>Mehrle et al. (1988).</b> Toxicity and bioconcentration of 2,3,7,8-tetrachlorodibenzodioxin and 2,3,7,8-tetrachlorodibenzofuran in rainbow-trout.</p> <p>Rainbow trout (<i>Oncorhynchus mykiss</i>)</p>                                                                                                                  |                                                                                                                                                                                                    |                                                                                                                                                                                                                                                                                                                                               | <p>Waterborne<br/>exposure</p>                             |
| <p><b>Delistraty and Stone (2007).</b> Dioxins, metals, and fish toxicity in ash residue from space heaters burning used motor oil.</p> <p>Rainbow trout (<i>Oncorhynchus mykiss</i>)</p>                                                                                                                                      |                                                                                                                                                                                                    |                                                                                                                                                                                                                                                                                                                                               | <p>Study not<br/>eligible. Mixed<br/>exposure</p>          |
| <p><b>Helder et al. (1982).</b> The toxicity and toxic potential of fly-ash from municipal incinerators assessed by means of a fish early life stage test.</p> <p>Rainbow trout (<i>Oncorhynchus mykiss</i>)</p>                                                                                                               |                                                                                                                                                                                                    |                                                                                                                                                                                                                                                                                                                                               | <p>Study not<br/>eligible. Mixed<br/>exposure</p>          |
| <p><b>Brinkmann et al. (2015).</b> Towards science-based sediment quality standards- Effects of field-collected sediments in rainbow trout (<i>Oncorhynchus mykiss</i>).</p>                                                                                                                                                   |                                                                                                                                                                                                    |                                                                                                                                                                                                                                                                                                                                               | <p>Study not<br/>eligible. Mixed<br/>exposure</p>          |

| Reference                                                                                                                                                                                               | Compounds<br>Dosed regime | Parameters measured and measure of effect | NOAEL (or<br>LOAEL)                |
|---------------------------------------------------------------------------------------------------------------------------------------------------------------------------------------------------------|---------------------------|-------------------------------------------|------------------------------------|
| Rainbow trout ( <i>Oncorhynchus mykiss</i> )                                                                                                                                                            |                           |                                           |                                    |
| <b>Fitzsimons et al. (1995)</b> . Occurrence of a swim-up syndrome in Lake Ontario lake trout in relation to contaminants and cultural practices.                                                       |                           |                                           | Study not eligible. Mixed exposure |
| Lake trout ( <i>Salvelinus namaycush</i> )                                                                                                                                                              |                           |                                           |                                    |
| <b>Cook et al. (2003)</b> . Effects of aryl hydrocarbon receptor-mediated early life stage toxicity on lake trout populations in Lake Ontario during the 20th century.                                  |                           |                                           | Study not eligible. Mixed exposure |
| Lake trout ( <i>Salvelinus namaycush</i> )                                                                                                                                                              |                           |                                           |                                    |
| <b>Whittle et al.</b> Foodchain accumulation of PCDD and PCDF isomers in the great-lakes aquatic community.                                                                                             |                           |                                           | Study not eligible. Mixed exposure |
| Lake trout ( <i>Salvelinus namaycush</i> )                                                                                                                                                              |                           |                                           |                                    |
| <b>Maier et al. 2015</b> . Biological plausibility as a tool to associate analytical data for micropollutants and effect potentials in wastewater, surface water, and sediments with effects in fishes. |                           |                                           | Study not eligible. Mixed exposure |
| Rainbow trout ( <i>Oncorhynchus mykiss</i> )<br>Brown trout ( <i>Salmo trutta</i> )                                                                                                                     |                           |                                           |                                    |
| <b>Buckman et al. (2007b)</b> . PCBs can diminish the influence of temperature on thyroid indices in rainbow trout ( <i>Oncorhynchus mykiss</i> ).                                                      |                           |                                           | Study not eligible. Mixed exposure |
| Rainbow trout ( <i>Oncorhynchus mykiss</i> )<br>Juveniles                                                                                                                                               |                           |                                           |                                    |
| <b>Miranda et al. (1992)</b> . Differential effects of 3,4,5,3',4',5'-hexachlorobiphenyl (HCB) on interrenal steroidogenesis in male and female rainbow trout <i>Oncorhynchus mykiss</i> .              |                           |                                           | Not a relevant endpoint            |
| Rainbow trout ( <i>Oncorhynchus mykiss</i> )<br>Adults (M and F)                                                                                                                                        |                           |                                           |                                    |
| <b>Palace et al. (1996)</b> . Mixed-function oxidase enzyme activity and oxidative stress in lake trout ( <i>Salvelinus namaycush</i> ) exposed to 3,3',4,4',5-pentachlorobiphenyl (PCB-126).           |                           |                                           | Not a relevant endpoint            |

| Reference                                                                                                                                                                                                                                                                                                                                         | Compounds<br>Dosed regime | Parameters measured and measure of effect | NOAEL (or<br>LOAEL)                           |
|---------------------------------------------------------------------------------------------------------------------------------------------------------------------------------------------------------------------------------------------------------------------------------------------------------------------------------------------------|---------------------------|-------------------------------------------|-----------------------------------------------|
| Lake trout ( <i>Salvelinus namaycush</i> )<br>Juveniles                                                                                                                                                                                                                                                                                           |                           |                                           |                                               |
| <b>Ait-Aissa et al. (2003)</b> . Biomarker responses in juvenile rainbow trout ( <i>Oncorhynchus mykiss</i> ) after single and combined exposure to low doses of cadmium, zinc, PCB77 and 17beta-oestradiol.                                                                                                                                      |                           |                                           | Single dose study.<br>Endpoints not relevant. |
| Rainbow trout ( <i>Oncorhynchus mykiss</i> )<br>Juveniles                                                                                                                                                                                                                                                                                         |                           |                                           |                                               |
| <b>Palace et al. (1997)</b> . Metabolism of H-3-retinol by lake trout ( <i>Salvelinus namaycush</i> ) pre-exposed to 3,3',4,4',5-pentachlorobiphenyl (PCB 126).                                                                                                                                                                                   |                           |                                           | Study not relevant.                           |
| Lake trout ( <i>Salvelinus namaycush</i> )                                                                                                                                                                                                                                                                                                        |                           |                                           |                                               |
| <b>Foster and Curtis (1999)</b> . 2,2',4,4',5,5'- and 3,3',4,4',5,5'-Hexachlorobiphenyl pretreatments alter the biliary excretion of a challenge dose of 7,12-(3H)dimethylbenz(a)anthracene in rainbow trout ( <i>Oncorhynchus mykiss</i> ).                                                                                                      |                           |                                           | Co-administration of PAHs. Study not eligible |
| Rainbow trout ( <i>Oncorhynchus mykiss</i> )                                                                                                                                                                                                                                                                                                      |                           |                                           |                                               |
| <b>Brown et al. (1998)</b> . Biochemical and histological responses in rainbow trout ( <i>Oncorhynchus mykiss</i> ) exposed to 2,3,4,7,8-pentachlorodibenzofuran.                                                                                                                                                                                 |                           |                                           | One dose group                                |
| Rainbow trout ( <i>Oncorhynchus mykiss</i> )                                                                                                                                                                                                                                                                                                      |                           |                                           |                                               |
| <b>Nault et al. (2102)</b> . Effects of polychlorinated biphenyls on whole animal energy mobilization and hepatic cellular respiration in rainbow trout, <i>Oncorhynchus mykiss</i> .                                                                                                                                                             |                           |                                           | One dose group                                |
| Rainbow trout ( <i>Oncorhynchus mykiss</i> )                                                                                                                                                                                                                                                                                                      |                           |                                           |                                               |
| <b>Vijayan et al. (1997)</b> . 3,3',4,4'-Tetrachlorobiphenyl affects cortisol dynamics and hepatic function in rainbow trout.                                                                                                                                                                                                                     |                           |                                           | One dose group                                |
| Rainbow trout ( <i>Oncorhynchus mykiss</i> )                                                                                                                                                                                                                                                                                                      |                           |                                           |                                               |
| <b>Gilbert et al. (1995)</b> . Retinoic acid hydroxylation in rainbow trout ( <i>Oncorhynchus mykiss</i> ) and the effect of a coplanar PCB, 3,3',4,4'-tetrachlorobiphenyl. Correction of title from Retinoic acid hydroxylation in rainbow trout ( <i>Oncorhynchus mykiss</i> ) and the effect of a coplanar PCP, 3,3',4,4'-tetrachlorobiphenyl. |                           |                                           | One dose group. Not eligible parameters.      |

| Reference                                                                                                                                                                             | Compounds<br>Dosed regime | Parameters measured and measure of effect | NOAEL (or<br>LOAEL)                       |
|---------------------------------------------------------------------------------------------------------------------------------------------------------------------------------------|---------------------------|-------------------------------------------|-------------------------------------------|
| Rainbow trout ( <i>Oncorhynchus mykiss</i> )                                                                                                                                          |                           |                                           |                                           |
| <b>Otto et al. (1997)</b> . Role of exogenous glutathione in teleost fish and its effects on antioxidant defense responses in rainbow trout exposed to 3,3',4,4'-tetrachlorobiphenyl. |                           |                                           | One dose group.<br>Endpoint not relevant. |
| Rainbow trout ( <i>Oncorhynchus mykiss</i> )                                                                                                                                          |                           |                                           |                                           |

**Table 95.** Studies on the adverse effects of PCDD/Fs and/or DL-PCBs in salmon

| Reference                                                                                                                                                                                                                                                                                             | Comments                                             |
|-------------------------------------------------------------------------------------------------------------------------------------------------------------------------------------------------------------------------------------------------------------------------------------------------------|------------------------------------------------------|
| <b>Miller et al. (1979).</b> Response of coho salmon and guppies to 2,3,7,8-tetrachlorodibenzo-para-dioxin (TCDD) in water.                                                                                                                                                                           | Waterborne exposure                                  |
| <b>Servizi et al. (1993).</b> Effects of biotreated bleached kraft mill effluent on fingerling chinook salmon ( <i>oncorhynchus-tshawytscha</i> ).                                                                                                                                                    | Not relevant. Exposure to effluent (mixed exposure). |
| <b>Asplund et al. (1999).</b> Organohalogen substances in muscle, egg and blood from healthy Baltic salmon ( <i>Salmo salar</i> ) and Baltic salmon that produced offspring with the M74 syndrome.                                                                                                    | Study not eligible. Mixed exposure                   |
| <b>Stehr et al. (2000).</b> Exposure of juvenile chinook and chum salmon to chemical contaminants in the Hylebos Waterway of Commencement Bay, Tacoma, Washington.                                                                                                                                    | Study not eligible. Mixed exposure                   |
| <b>Williams and Giesy (1992).</b> Relationships among concentrations of individual polychlorinated biphenyl (PCB) congeners, 2,3,7,8-tetrachlorodibenzo- <i>p</i> -dioxin equivalents (TCDD-EQ), and rearing mortality of chinook salmon ( <i>Oncorhynchus-tshawytscha</i> ) eggs from lake-michigan. | Study not eligible. Mixed exposure                   |
| <b>Vuorinen et al. (2002).</b> PCDD, PCDF, PCB and thiamine in Baltic herring ( <i>Clupea harengus</i> L.) and sprat <i>Sprattus sprattus</i> (L.) as a background to the M74 syndrome of Baltic salmon ( <i>Salmo salar</i> L.).                                                                     | Study not eligible. Mixed exposure                   |
| <b>Zitko and Choi (1973).</b> Oral toxicity of chlorinated dibenzofurans to juvenile Atlantic salmon.                                                                                                                                                                                                 | Study not eligible. Mixed exposure                   |
| <b>Vuorinen et al. (1997).</b> The M74 syndrome of Baltic salmon ( <i>Salmo salar</i> ) and organochlorine concentrations in the muscle of female salmon.                                                                                                                                             | Study not eligible. Mixed exposure                   |
| <b>Arukwe et al. (2001).</b> <i>In vivo</i> modulation of nonylphenol-induced zonagenesis and vitellogenesis by the antiestrogen, 3,3',4,4'-tetrachlorobiphenyl (PCB-77) in juvenile fish.                                                                                                            | One dose group                                       |



**Table 96.** Studies on the effects of PCDD/Fs and/or DL-PCBs in feeding trials with Atlantic salmon

| Reference                                                                                                                                                                                                                                                                                                                                                                                                                   | Feeds and experimental design                                                                                                                                                                                                                                                                                                                                                                                              | Dose and effects                                                                                                                                                                                                                                                                                                                                                                                                                                                     | NOAEL (or LOAEL)                                                                                 |
|-----------------------------------------------------------------------------------------------------------------------------------------------------------------------------------------------------------------------------------------------------------------------------------------------------------------------------------------------------------------------------------------------------------------------------|----------------------------------------------------------------------------------------------------------------------------------------------------------------------------------------------------------------------------------------------------------------------------------------------------------------------------------------------------------------------------------------------------------------------------|----------------------------------------------------------------------------------------------------------------------------------------------------------------------------------------------------------------------------------------------------------------------------------------------------------------------------------------------------------------------------------------------------------------------------------------------------------------------|--------------------------------------------------------------------------------------------------|
| <p><b>Berntssen et al. (2010b).</b> Reducing persistent organic pollutants while maintaining long chain omega-3 fatty acid in farmed Atlantic salmon using decontaminated fish oils for an entire production cycle.</p> <p><b>Lock et al. (2011).</b> Dietary decontaminated fish oil has no negative impact on fish performance, flesh quality or production-related diseases in Atlantic salmon (<i>Salmo salar</i>).</p> | <p>Control diet (uncleaned fish oil, mixture of POPs), diet with clean oil<br/>Feed concentrations:<br/>Control: 0.29 ng/kg feed (1.5 ng PCDD/F/kg feed and 2.7 ng sum PCDD/F+DL-PCB/kg feed<br/>Clean: 0.064 ng TCDD/kg feed (0.4 ng PCDD/F/kg feed and 0.6 ng sum PCDD/F+DL-PCB/kg feed<br/>Feeding rate 0.076% bw/day.<br/>Four replicates of 200 fish/dietary treatment.<br/>Approx. 18 months exposure.</p>           | <p><b>Dose:</b> Control feed: 0.02 ng PCDD/F + DL-PCB<sub>2005</sub> TEQ/kg bw/day<br/>Clean oil feed: 0.004 ng PCDD/F + DL-PCB<sub>2005</sub> TEQ/kg bw/day<br/>Fish grew from 81 g to 4.9 kg<br/>Growth: no effects<br/>Feed conversion: no effects<br/>Mortality: none</p> <p>No significant changes were observed in production-related diseases (fin/skin erosion, bone deformity, cataracts) between treatments.</p>                                           | <p>NOAEL=0.02 ng PCDD/F + DL-PCB<sub>2005</sub> TEQ/kg bw/day<br/><br/>(highest dose tested)</p> |
| <p><b>Berntssen et al. (2010a).</b> Chemical contaminants in aquafeeds and Atlantic salmon (<i>Salmo salar</i>) following the use of traditional- versus alternative feed ingredients.</p> <p><b>Torstensen et al. (2008).</b> Novel production of Atlantic salmon (<i>Salmo salar</i>) protein based on combined replacement of fish meal and fish oil with plant meal and vegetable oil blends.</p>                       | <p>Control diet (fish meal and fish oil; mixture of POPs), diet with mainly plant oil and meal.<br/>Feed concentrations:<br/>Control: 0.27 ng/kg feed (2.2 ng PCDD/F/kg feed and 8.1 ng sum PCDD/F+DL-PCB/kg feed<br/>Clean: 0.04 ng TCDD/kg feed (0.25 ng PCDD/F/kg feed and 0.98 ng sum PCDD/F+DL-PCB/kg feed<br/>Feeding rate: overfeeding Triplicates of 500 fish/dietary treatment<br/>Approx. 12 months exposure</p> | <p><b>Dose:</b> for calculation of dose the feeding rate used by Berntssen et al. (2010) was applied to this study: Control feed: 0.06 ng PCDD/F + DL-PCB<sub>2005</sub> TEQ/kg bw/day<br/>Plant-based feed: 0.007 ng PCDD/F + DL-PCB<sub>2005</sub> TEQ/kg bw/day</p> <p>Fish grew from 350 g to 3.9 kg (control fish) and to 3.3 kg (plant-fed fish)</p> <p>Growth: Significantly lower in plant-fed fish</p> <p>Mortality: negligible (&lt;1% in both groups)</p> | <p>NOAEL=0.06 ng PCDD/F + DL-PCB<sub>2005</sub> TEQ/kg bw/day<br/><br/>(highest dose tested)</p> |
| <p><b>Olli et al. (2010).</b> Removal of persistent organic pollutants from Atlantic salmon (<i>Salmo salar</i> L.) diets: Influence on growth, feed utilization efficiency and product quality.</p>                                                                                                                                                                                                                        | <p>Control diet (uncleaned fish oil), diet with clean oil.<br/>Mean feed concentrations:<br/>Control: 1.4 ng PCDD/F/kg feed and 2.8 ng sum PCDD/F+DL-PCB/kg feed<br/>Clean: 0.2 ng PCDD/F/kg feed and 0.5 ng sum PCDD/F+DL-PCB/kg feed.</p>                                                                                                                                                                                | <p><b>Dose:</b> for calculation of dose, the feeding rate used by Berntssen et al. (2010a) was applied to this study:<br/>Control feed: 0.02 ng PCDD/F + DL-PCB<sub>2005</sub> TEQ/kg bw/day<br/>Clean oil feed: 0.004 ng PCDD/F + DL-PCB<sub>2005</sub> TEQ/kg bw/day<br/>Fish grew from 65 g to 4.4 kg.</p>                                                                                                                                                        | <p>NOAEL=0.02 ng PCDD/F + DL-PCB<sub>2005</sub> TEQ/kg bw/day<br/><br/>(highest dose tested)</p> |

| Reference | Feeds and experimental design                                                                                   | Dose and effects                                                                                                                                                                                                                  | NOAEL (or LOAEL) |
|-----------|-----------------------------------------------------------------------------------------------------------------|-----------------------------------------------------------------------------------------------------------------------------------------------------------------------------------------------------------------------------------|------------------|
|           | Feeding rate: 10% overfeeding.<br>Four replicates of 300 fish/dietary treatment.<br>Approx. 18 months exposure. | Growth: significantly increased in clean oil group in one of five time periods, not in the other four periods. No significant differences in nutrient digestibility or condition factor between treatments<br><br>Mortality: none |                  |

**Table 97.** Studies on the adverse effects of PCDD/Fs and/or DL-PCBs in sea bream, bass and sole

| Reference                                                                                                                                                                                                                                                                              | Compounds<br>Dose regime                              | Parameters measured and measure of effect                                                                                                                                                                                                                  | NOAEL (or LOAEL)                                                            |
|----------------------------------------------------------------------------------------------------------------------------------------------------------------------------------------------------------------------------------------------------------------------------------------|-------------------------------------------------------|------------------------------------------------------------------------------------------------------------------------------------------------------------------------------------------------------------------------------------------------------------|-----------------------------------------------------------------------------|
| <b>Kleeman et al. (1998).</b> Species differences in 2,3,7,8-tetrachlorodibenzo- <i>p</i> -dioxin toxicity and biotransformation in fish.<br><br>Largemouth bass ( <i>Micropterus salmoide</i> )                                                                                       | TCDD<br><br>0, 1, 5, 25, 125 µg/kg<br><br><i>i.p.</i> | <b>Lethality:</b> 80-day LD <sub>50</sub> (median, 95 CI)=11 (9-14) µg/kg<br><b>Body weight gain:</b> no significant decrease compared to controls.<br><b>Fin necrosis:</b> observed at the two highest dose groups. Cutaneous hyperpigmentation observed. | NOAEL (fin necrosis): 5 µg/kg                                               |
| <b>Arellano et al. (2001).</b> Histopathological alterations and induction of cytochrome P-450 1A in the liver and gills of the gilthead seabream ( <i>Sparus aurata</i> ) exposed to 2,3,7,8-tetrachlorodibenzo- <i>p</i> -dioxin.<br><br>Gilthead sea bream ( <i>Sparus aurata</i> ) |                                                       |                                                                                                                                                                                                                                                            | Waterborne exposure                                                         |
| <b>Calo et al. (2010).</b> Estrogenic followed by anti-estrogenic effects of PCBs exposure in juvenil fish ( <i>Spaurus aurata</i> ).<br><br><i>Spaurus aurata</i>                                                                                                                     |                                                       |                                                                                                                                                                                                                                                            | Waterborne exposure. One dose group                                         |
| <b>Torre et al. (2015).</b> Influence of titanium dioxide nanoparticles on 2,3,7,8-tetrachlorodibenzo- <i>p</i> -dioxin bioconcentration and toxicity in the marine fish European sea bass ( <i>Dicentrarchus labrax</i> ).<br><br>Sea bass ( <i>Dicentrarchus labrax</i> )            |                                                       |                                                                                                                                                                                                                                                            | Waterborne exposure. Not a relevant study                                   |
| <b>Cannas et al. (2013).</b> PCBs contamination does not alter aerobic metabolism and tolerance to hypoxia of juvenile sole ( <i>Solea solea</i> L. 1758).<br><br>Sole ( <i>Solea solea</i> )                                                                                          |                                                       |                                                                                                                                                                                                                                                            | Mixed exposure, not relevant (Mix of 4 congeners (PCB-153, -149, 105, 118)) |
| <b>Houtman et al. (2007).</b> Biomonitoring of estrogenic exposure and identification of responsible compounds in bream from Dutch surface waters.<br><br>Bream ( <i>Abramis brama</i> )                                                                                               |                                                       |                                                                                                                                                                                                                                                            | Mixed exposure, not relevant                                                |
| <b>Navas et al. (2005).</b> Organochlorine compounds in liver and concentrations of vitellogenin and 17beta-estradiol in plasma of sea bass fed with a commercial or with a natural diet.                                                                                              |                                                       |                                                                                                                                                                                                                                                            | Mixed exposure, not relevant                                                |

| Reference                                                                                                                                                                                                                                                       | Compounds<br>Dose regime | Parameters measured and measure of effect | NOAEL (or LOAEL)             |
|-----------------------------------------------------------------------------------------------------------------------------------------------------------------------------------------------------------------------------------------------------------------|--------------------------|-------------------------------------------|------------------------------|
| Sea bass ( <i>Dicentrarchus labrax</i> )<br><b>Greco et al. (2010)</b> . Bioaccumulation markers and biochemical responses in European sea bass ( <i>Dicentrarchus labrax</i> ) raised under different environmental conditions.                                |                          |                                           | Mixed exposure, not relevant |
| Sea bass ( <i>Dicentrarchus labrax</i> )<br><b>Schnitzler (2008)</b> . Effects of persistent organic pollutants on the thyroid function of the European sea bass ( <i>Dicentrarchus labrax</i> ) from the Aegean sea, is it an endocrine disruption?.           |                          |                                           | Mixed exposure, not relevant |
| Sea bass ( <i>Dicentrarchus labrax</i> )<br><b>Schnitzler et al. (2012)</b> . Environmental factors affecting thyroid function of wild sea bass ( <i>Dicentrarchus labrax</i> ) from European coasts.                                                           |                          |                                           | Mixed exposure, not relevant |
| Wild sea bass ( <i>Dicentrarchus labrax</i> )<br><b>Hinck et al. 2007</b> . Chemical contaminants, health indicators, and reproductive biomarker responses in fish from the Colorado River and its tributaries.                                                 |                          |                                           | Mixed exposure, not relevant |
| Largemouth bass ( <i>Micropterus salmoides</i> )<br><b>Hinck et al. 2008</b> . Chemical contaminants, health indicators, and reproductive biomarker responses in fish from rivers in the Southeastern United States. <i>Sci Total Environ.</i> 2008. 390:538-57 |                          |                                           | Mixed exposure, not relevant |
| Largemouth bass ( <i>Micropterus salmoides</i> )<br>Common carp ( <i>Cyprinus carpio</i> )<br><b>Hodson et al. 1992</b> . Effects of bleached kraft mill effluent on fish in the St-Maurice river, Quebec.                                                      |                          |                                           | Mixed exposure, not relevant |
| White suckers ( <i>Cutostomus commersoni</i> )<br><b>Martyniuk et al. (2009)</b> . Aquatic contaminants alter genes involved in neurotransmitter synthesis and gonadotropin release in largemouth bass.                                                         |                          |                                           | Not a relevant endpoint      |
| Largemouth bass ( <i>Micropterus salmoides</i> )<br><b>Vaccaro et al. (2005)</b> . Effects of 17 beta-estradiol, 4-nonylphenol and PCB 126                                                                                                                      |                          |                                           | Not a relevant endpoint      |

| Reference                                                                                                                                                                                                                                          | Compounds<br>Dose regime | Parameters measured and measure of effect | NOAEL (or LOAEL)                                                                                           |
|----------------------------------------------------------------------------------------------------------------------------------------------------------------------------------------------------------------------------------------------------|--------------------------|-------------------------------------------|------------------------------------------------------------------------------------------------------------|
| on the estrogenic activity and phase 1 and 2 biotransformation enzymes in male sea bass ( <i>Dicentrarchus labrax</i> ).                                                                                                                           |                          |                                           |                                                                                                            |
| Sea bass ( <i>Dicentrarchus labrax</i> )                                                                                                                                                                                                           |                          |                                           |                                                                                                            |
| <b>Rankouhi et al. (2004)</b> . Effects of natural and synthetic estrogens and various environmental contaminants on vitellogenesis in fish primary hepatocytes: comparison of bream ( <i>Abramis brama</i> ) and carp ( <i>Cyprinus carpio</i> ). |                          |                                           | <i>In vitro</i> study only one dose; not a relevant study                                                  |
| Sea bream ( <i>Abramis brama</i> )                                                                                                                                                                                                                 |                          |                                           |                                                                                                            |
| <b>Lauriano et al. (2012)</b> . Mast cells in the intestine and gills of the sea bream, <i>Sparus aurata</i> , exposed to a polychlorinated biphenyl, PCB 126.                                                                                     |                          |                                           | <i>In vitro</i> exposure, only one dose; not a relevant study                                              |
| Sea bream ( <i>Sparus aurata</i> )                                                                                                                                                                                                                 |                          |                                           |                                                                                                            |
| <b>Ábalos et al. (2008)</b> . Effects on growth and biochemical responses in juvenile gilthead seabream 'Sparus aurata' after long-term dietary exposure to low levels of dioxins.                                                                 |                          |                                           | Exposure to a mixture of PCDD/Fs at one dose, not relevant endpoints – only EROD induction was significant |
| Gilthead sea bream ( <i>Sparus aurata</i> )                                                                                                                                                                                                        |                          |                                           |                                                                                                            |

**Table 98.** Studies on the adverse effects of PCDD/Fs and/or DL-PCBs in eel

| Reference                                                                                                                                                                                                                                                                          | Comments                                      |
|------------------------------------------------------------------------------------------------------------------------------------------------------------------------------------------------------------------------------------------------------------------------------------|-----------------------------------------------|
| <b>Foekema et al. (2016).</b> Maternally transferred dioxin-like compounds can affect the reproductive success of european eel.                                                                                                                                                    | Field exposure. TK modelling.<br>Not relevant |
| <b>Couderc et al. (2016).</b> Thyroid endocrine status of wild European eels ( <i>Anguilla anguilla</i> ) in the Loire (France). Relationships with organic contaminant body burdens.                                                                                              | Field exposure                                |
| <b>Geeraerts et al. (2011).</b> Reproduction of European eel jeopardised by high levels of dioxins and dioxin-like PCBs?                                                                                                                                                           | Field exposure                                |
| <b>Burroni et al. (2009).</b> Persistent organic pollutants and enzyme activities in European eel ( <i>Anguilla anguilla</i> ) from Orbetello lagoon.                                                                                                                              | Field exposure                                |
| <b>Oliver et al. (2015).</b> Lipid increases in European eel ( <i>Anguilla anguilla</i> ) in Scotland 1986-2008: an assessment of physical parameters and the influence of organic pollutants.                                                                                     | Field exposure                                |
| <b>Palstra et al. (2006).</b> Are dioxin-like contaminants responsible for the eel ( <i>Anguilla anguilla</i> ) drama?                                                                                                                                                             | Field exposure                                |
| <b>Nigro et al. (2002).</b> Induction of DNA strand breakage and apoptosis in the eel <i>Anguilla anguilla</i> .                                                                                                                                                                   | Not a relevant endpoint                       |
| <b>Otto et al. (1997).</b> Role of exogenous glutathione in teleost fish and its effects on antioxidant defense responses in rainbow trout exposed to 3,3',4,4'-tetrachlorobiphenyl.                                                                                               | Single dose, and endpoints not relevant       |
| <b>Sures et al. (2006).</b> Effects of infection with <i>Anguillicola crassus</i> and simultaneous exposure with Cd and 3,3',4,4',5-pentachlorobiphenyl (PCB 126) on the levels of cortisol and glucose in European eel ( <i>Anguilla anguilla</i> ).                              | One dose group only                           |
| <b>Sures and Knopf (2004).</b> Individual and combined effects of cadmium and 3,3',4,4',5-pentachlorobiphenyl (PCB 126) on the humoral immune response in European eel ( <i>Anguilla anguilla</i> ) experimentally infected with larvae of <i>Anguillicola crassus</i> (Nematoda). | One dose group only                           |
| <b>van Ginneken et al. (2009).</b> PCBs and the energy cost of migration in the European eel ( <i>Anguilla anguilla</i> L.).                                                                                                                                                       | One dose group only                           |

**Table 99.** Studies on the adverse effects of PCDD/Fs and/or DL-PCBs in sturgeon

| Reference                                                                                                                                                                                                                                                                                                                   | Comments       |
|-----------------------------------------------------------------------------------------------------------------------------------------------------------------------------------------------------------------------------------------------------------------------------------------------------------------------------|----------------|
| <p><b>Ndayibagira et al. (1995).</b> Effects of 3,3',4,4'-tetrachlorobiphenyl on the dynamics of vitamin-a in brook trout (<i>Salvelinus-fontinalis</i>) and intestinal retinoid concentrations in lake sturgeon (<i>Acipenser-fulvescens</i>).</p> <p>Sturgeon (<i>Acipenser fulvescens</i>)</p>                           | One dose group |
| <p><b>Foster et al. (2001).</b> Plasma androgen correlation, EROD induction, reduced, condition factor, and the occurrence of organochlorine pollutants in reproductively immature white sturgeon (<i>Acipenser transmontanus</i>) from the Columbia River, USA.</p> <p>White sturgeon (<i>Acipenser transmontanus</i>)</p> | Field exposure |
| <p><b>Koch et al. (2006).</b> Elevated organochlorines in the brain-hypothalamic-pituitary complex of intersexual shovelnose sturgeon.</p> <p>Shovelnose sturgeon (<i>Scaphirhynchus platorynchus</i>)</p>                                                                                                                  | Field exposure |

**Table 100.** Studies on the adverse effects of PCDD/Fs and/or DL-PCBs in carp

| Reference                                                                                                                                                                                                                                                                        | Compounds<br>Dose regime                                                                                                                         | Parameters measured and measures of effect                                                                                                                                                                                                                                                                                                                                                                                                                                                                                                                                                                                                                                               | NOAEL<br>(or LOAEL)                                       |
|----------------------------------------------------------------------------------------------------------------------------------------------------------------------------------------------------------------------------------------------------------------------------------|--------------------------------------------------------------------------------------------------------------------------------------------------|------------------------------------------------------------------------------------------------------------------------------------------------------------------------------------------------------------------------------------------------------------------------------------------------------------------------------------------------------------------------------------------------------------------------------------------------------------------------------------------------------------------------------------------------------------------------------------------------------------------------------------------------------------------------------------------|-----------------------------------------------------------|
| <p><b>Van der weiden et al. (1994).</b> Concurrence of P450-1A induction and toxic effects in the mirror carp (<i>Cyprinus-carpio</i>), after administration of a low-dose of 2,3,7,8-tetrachlorodibenzo-<i>p</i>-dioxin.</p> <p>Carp (<i>Cyprinus carpio</i>)<br/>Juveniles</p> | <p>TCDD</p> <p>0, 0.01, 0.03, 0.05, 0.27, 0.57, 2.93 µg/kg bw</p> <p><i>i.p.</i> single</p> <p>Sampling 1, 3, 6 and 12 weeks after treatment</p> | <p><b>Mortality:</b> 60 % between 6-12 weeks after administration of the highest dose.</p> <p><b>Growth:</b> statistical decrease in body weight after 12 weeks in the highest dose group.</p> <p><b>Pathology:</b> Cutaneous haemorrhages, apathetical behaviour, swollen gills, sunken eyes at doses of 0.27 µg/kg bw and higher after 3 weeks. Histopathological effects in spleen (increased number of erythrocytes and melano-macrophage centres) at 0.05 µg/kg and higher; data not statistically analysed.</p> <p>Significant decreases in haemoglobin and haematocrit at the highest dose, and significant increase in spleen and kidney weight at this dose after 12 weeks.</p> | <p>NOAEL=0.57 µg/kg bw (growth, organ weight, Hb, Ht)</p> |
| <p><b>Kleeman et al. (1998).</b> Species differences in 2,3,7,8-tetrachlorodibenzo-<i>p</i>-dioxin toxicity and biotransformation in fish.</p> <p>Carp (<i>Cyprinus carpio</i>)</p>                                                                                              | <p>TCDD</p> <p>0, 1, 5, 25, 125 µg/kg</p> <p><i>i.p.</i></p>                                                                                     | <p><b>Lethality:</b> 80-day LD<sub>50</sub> (median, 95 CI) = 3 (2-4) µg/kg</p> <p><b>Body weight gain:</b> non significant decrease.</p> <p><b>Fin necrosis:</b> observed at the two highest dose groups. Cutaneous hyperpigmentation evident at the lowest dose (1 µg/kg) and further graded increases in pigmentation with increasing dose.</p>                                                                                                                                                                                                                                                                                                                                       | <p>NOAEL (fin necrosis)= 5 µg/kg bw</p>                   |
| <p><b>Van der weiden et al. (1989).</b> Bioavailability of PCDDs and PCDFs from bottom sediments and some associated biological effects in the carp (<i>cyprinus-carpio</i>).</p>                                                                                                |                                                                                                                                                  |                                                                                                                                                                                                                                                                                                                                                                                                                                                                                                                                                                                                                                                                                          | <p>Mixed exposure, not relevant.</p>                      |
| <p><b>Bervoets (2009).</b> Bioaccumulation of micropollutants and biomarker responses in caged carp (<i>Cyprinus carpio</i>).</p>                                                                                                                                                |                                                                                                                                                  |                                                                                                                                                                                                                                                                                                                                                                                                                                                                                                                                                                                                                                                                                          | <p>Field exposure</p>                                     |
| <p><b>Svobodova et al. (1996).</b> Ontogenetic characterization of young carp (<i>Cyprinus carpio</i>) obtained by artificial reproduction of parental fishes loaded with PCB residues.</p>                                                                                      |                                                                                                                                                  |                                                                                                                                                                                                                                                                                                                                                                                                                                                                                                                                                                                                                                                                                          | <p>Field exposure</p>                                     |
| <p><b>Xu et al. (2002).</b> Endocrine effects of sublethal exposure to persistent organic pollutants (POPS) on silver carp (<i>Hypophthalmichthys molitrix</i>).</p>                                                                                                             |                                                                                                                                                  |                                                                                                                                                                                                                                                                                                                                                                                                                                                                                                                                                                                                                                                                                          | <p>Field exposure</p>                                     |
| <p><b>Van der weiden et al. (1993).</b> Cytochrome-P450-1A induction in the common carp (<i>cyprinus-carpio</i>) following exposure to contaminated sediments with halogenated polyaromatics.</p>                                                                                |                                                                                                                                                  |                                                                                                                                                                                                                                                                                                                                                                                                                                                                                                                                                                                                                                                                                          | <p>Sediment from the field, mixed exposure</p>            |



| Reference                                                                                                                                                                                                                                         | Compounds<br>Dose regime | Parameters measured and measures od effect | NOEL<br>(or LOAEL)                  |
|---------------------------------------------------------------------------------------------------------------------------------------------------------------------------------------------------------------------------------------------------|--------------------------|--------------------------------------------|-------------------------------------|
| <b>Hinck et al. 2007.</b> Chemical contaminants, health indicators, and reproductive biomarker responses in fish from the Colorado River and its tributaries.                                                                                     |                          |                                            | Field exposure                      |
| <b>Hinck et al. 2008.</b> Chemical contaminants, health indicators, and reproductive biomarker responses in fish from rivers in the Southeastern United States.                                                                                   |                          |                                            | Field exposure                      |
| <b>Rankouhi et al. (2004).</b> Effects of natural and synthetic estrogens and various environmental contaminants on vitellogenesis in fish primary hepatocytes: comparison of bream ( <i>Abramis brama</i> ) and carp ( <i>Cyprinus carpio</i> ). |                          |                                            | <i>in vitro</i> study, not relevant |

**Table 101.** Studies on the adverse effects of PCDD/Fs and/or DL-PCBs in tilapia

| Reference                                                                                                                                                                                                                                                      | Compounds<br>Dose regime                                                                                                                                                            | Endpoint health category                                                                                                                                                                                                                                                                                                                                                                                                                                                                                                                                                      | NOAEL<br>(or LOAEL) |
|----------------------------------------------------------------------------------------------------------------------------------------------------------------------------------------------------------------------------------------------------------------|-------------------------------------------------------------------------------------------------------------------------------------------------------------------------------------|-------------------------------------------------------------------------------------------------------------------------------------------------------------------------------------------------------------------------------------------------------------------------------------------------------------------------------------------------------------------------------------------------------------------------------------------------------------------------------------------------------------------------------------------------------------------------------|---------------------|
| <b>Hart et al. (1999).</b> Leukocyte hypocellularity in the spleen and pronephros of tilapia ( <i>Oreochromis niloticus</i> ) exposed to 2,3,7,8-tetrachlorodibenzo- <i>p</i> -dioxin (TCDD) may result from antiproliferative effects and enhanced apoptosis. | TCDD<br><br>0, 1, 5 µg/kg/day<br><br><i>i.p.</i> For 5 days                                                                                                                         | <b>Splenic and Pronephric Cellularity:</b> Significant reduction in splenic and pronephric cellularity at 5 µg/kg.<br><b>Histopathology:</b> Lymphoid depletion observed at the highest dose group                                                                                                                                                                                                                                                                                                                                                                            | NOAEL= 1 µg/kg/day  |
| <b>Quabius et al. (2000).</b> Influence of dietary exposure to polychlorinated biphenyl 126 and nutritional state on stress response in tilapia ( <i>Oreochromis mossambicus</i> ) and rainbow trout ( <i>Oncorhynchus mykiss</i> ).                           | PCB-126<br><br>Low dose: 25 mg/kg food/day (equal to 0.5 mg/kg fish/day)<br><br>High dose: 2,500 mg/kg food/day (equal to 50 mg/kg fish/day)<br><br>Control food<br><br>Oral (feed) | <b>Mortality:</b> no mortality.<br><b>Behavior:</b> no changes observed.<br><b>Food consumption:</b> no changes observed.<br><b>Resting plasma ACTH and cortisol levels:</b> not affected by treatment.<br><b>Resting plasma glucose:</b> affected only in fish sampled at the end of the starvation period (high-dose only). Confinement in fish sampled either before or after starvation led to significant increases in all parameters investigated.<br><b>Morphometric analysis:</b> reduced nuclear area of starved fish sampled at rest, and only at the highest dose. |                     |
| <b>Adeogun et al. (2016).</b> Intersex and alterations in reproductive development of a cichlid, <i>Tilapia guineensis</i> , from a municipal domestic water supply lake (Eleyele) in Southwestern Nigeria.                                                    |                                                                                                                                                                                     |                                                                                                                                                                                                                                                                                                                                                                                                                                                                                                                                                                               | Field exposure      |
| <b>Quabius et al. (1997).</b> Interrenal stress responsiveness of tilapia ( <i>Oreochromis mossambicus</i> ) is impaired by dietary exposure to PCB 126.                                                                                                       |                                                                                                                                                                                     |                                                                                                                                                                                                                                                                                                                                                                                                                                                                                                                                                                               | One dose group      |

**Table 102.** Studies on the adverse effects of PCDD/Fs and/or DL-PCBs in other fish species

| Reference                                                                                                                                                                                                                                                                            | Compounds<br>Dose regime                                                                                                                                                              | Endpoint(s)                                                                                                                                                                                                                                                                                                                                                                                                                                               | NOAEL<br>(or LOAEL)                                                                                 |
|--------------------------------------------------------------------------------------------------------------------------------------------------------------------------------------------------------------------------------------------------------------------------------------|---------------------------------------------------------------------------------------------------------------------------------------------------------------------------------------|-----------------------------------------------------------------------------------------------------------------------------------------------------------------------------------------------------------------------------------------------------------------------------------------------------------------------------------------------------------------------------------------------------------------------------------------------------------|-----------------------------------------------------------------------------------------------------|
| <p><b>Regala et al. (2001).</b> The effects of tributyltin (TBT) and 3,3',4,4',5-pentachlorobiphenyl (PCB-126) mixtures on antibody responses and phagocyte oxidative burst activity in channel catfish, <i>Ictalurus punctatus</i>.</p> <p>Catfish (<i>Ictalurus punctatus</i>)</p> | <p>PCB-126</p> <p>Acute: <i>i.p.</i> single<br/>0, 0.01, 1 mg/kg</p> <p>Repeated: 0, 1.7, 170 µg/kg.<br/>Every 3 days over 16 days to yield a cumulative dose of 0.01 or 1 mg/kg.</p> | <p><b>Antibody response:</b><br/><u>Acute:</u> the highest dose resulted in lower antibody response.<br/><u>Repeated:</u> no effect.</p>                                                                                                                                                                                                                                                                                                                  |                                                                                                     |
| <p><b>Kleeman et al. (1998).</b> Species differences in 2,3,7,8-tetrachlorodibenzo-<i>p</i>-dioxin toxicity and biotransformation in fish.</p> <p>Yellow perch (<i>Perca fluviatilis</i>)<br/>Bullhead (<i>Ictalurus melas</i>)</p>                                                  | <p>TCDD</p> <p>0, 1, 5, 25, 125 µg/kg</p> <p><i>i.p.</i></p>                                                                                                                          | <p><b>Lethality:</b> 80-day LD<sub>50</sub> (median, 95 CI) for:<br/>Yellow perch: 3 (2-4) µg/kg<br/>Bullhead: 5 (4-8) µg/kg</p> <p><b>Body weight gain:</b><br/>Yellow perch: significant decrease at 5 µg/kg.<br/>Bullhead: non significant decrease.</p> <p><b>Fin necrosis:</b><br/>Yellow perch: observed at the two highest dose groups. Cutenous hemorrhages.<br/>Bullhead: observed at the two highest dose groups. No cutaneous hemorrhages.</p> | <p>NOAEL:</p> <p>Yellow perch:<br/>1 µg/kg<br/>(growth)</p> <p>Bullhead: 5 µg/kg (fin necrosis)</p> |
| <p><b>Hutchinson et al. (1999).</b> Evaluation of immune function in juvenile turbot <i>Scophthalmus maximus</i> (L.) exposed to sediments contaminated with polychlorinated biphenyls.</p> <p>Turbot (<i>Scophthalmus maximus</i>)</p>                                              |                                                                                                                                                                                       |                                                                                                                                                                                                                                                                                                                                                                                                                                                           | Field exposure                                                                                      |
| <p><b>Bussolaro et al. (2012).</b> Bioaccumulation and related effects of PCBs and organochlorinated pesticides in freshwater fish <i>Hypostomus commersoni</i>.</p> <p>Catfish (<i>Hypostomus commersoni</i>)</p>                                                                   |                                                                                                                                                                                       |                                                                                                                                                                                                                                                                                                                                                                                                                                                           | Field exposure                                                                                      |
| <p><b>Hinck et al. 2007.</b> Chemical contaminants, health indicators, and reproductive biomarker responses in fish from the Colorado River and its tributaries.</p>                                                                                                                 |                                                                                                                                                                                       |                                                                                                                                                                                                                                                                                                                                                                                                                                                           | Field exposure                                                                                      |

| Reference                                                                                                                                                                                                 | Compounds<br>Dose regime | Endpoint(s) | NOAEL<br>(or LOAEL) |
|-----------------------------------------------------------------------------------------------------------------------------------------------------------------------------------------------------------|--------------------------|-------------|---------------------|
| Channel catfish ( <i>Ictalurus punctatus</i> )                                                                                                                                                            |                          |             |                     |
| <b>Maisano et al. (2016)</b> . PCB and OCP accumulation and evidence of hepatic alteration in the Atlantic bluefin tuna, <i>T. thynnus</i> , from the Mediterranean Sea.                                  |                          |             | Field exposure      |
| Atlantic bluefin tuna ( <i>Thunnus thynnus</i> )                                                                                                                                                          |                          |             |                     |
| 4503 - <b>Whittle et al. (1992)</b> . Foodchain accumulation of PCDD and PCDF isomers in the great-lakes aquatic community.                                                                               |                          |             | Field exposure      |
| Alewife, Asmelt, Aculpin                                                                                                                                                                                  |                          |             |                     |
| <b>Maier et al. (2015)</b> . Biological plausibility as a tool to associate analytical data for micropollutants and effect potentials in wastewater, surface water, and sediments with effects in fishes. |                          |             | Mixed exposure      |
| Chub ( <i>Leuciscus cephalus</i> )                                                                                                                                                                        |                          |             |                     |

**Table 103.** Studies on the adverse effects of PCDD/Fs and/or DL-PCBs in several fish species administered *in ovo* (more than one dose group studies)

| Reference                                                                                                                                                                                                                                                                         | Compounds<br>Dose regime                                                                                                                             | Endpoint(s)                                                                                              | Comments       |
|-----------------------------------------------------------------------------------------------------------------------------------------------------------------------------------------------------------------------------------------------------------------------------------|------------------------------------------------------------------------------------------------------------------------------------------------------|----------------------------------------------------------------------------------------------------------|----------------|
| <b>Carvalho and Tillitt (2004).</b> 2,3,7,8-TCDD effects on visual structure and function in swim-up rainbow trout.<br><br>Rainbow trout                                                                                                                                          | TCDD<br><br>0, 38, 113, 300 pg/g egg                                                                                                                 | Visual/motor function                                                                                    |                |
| <b>Carvalho et al. (2004).</b> Intra-strain dioxin sensitivity and morphometric effects in swim-up rainbow trout ( <i>Oncorhynchus mykiss</i> ).<br><br>Rainbow trout ( <i>Oncorhynchus mykiss</i> )                                                                              | TCDD<br><br>0, 38, 113, 200, 300, 500, 1,000 pg/g egg                                                                                                | Mortality, yolk-sac edema, morphometric measures.                                                        |                |
| <b>Hornung et al. (1999).</b> 2,3,7,8-Tetrachlorodibenzo- <i>p</i> -dioxin alters cardiovascular and craniofacial development and function in sac fry of rainbow trout ( <i>Oncorhynchus mykiss</i> ).<br><br>Rainbow trout ( <i>Oncorhynchus mykiss</i> )                        | TCDD<br><br>0, 385, 640 pg/g egg                                                                                                                     | Reproductive effects, cardiovascular effects, musculoskeletal, bone, mortality, craniofacial development |                |
| <b>Zabel et al. (1995a).</b> Toxic equivalency factors of polychlorinated dibenzo- <i>p</i> -dioxin, dibenzofuran and biphenyl congeners based on early-life stage mortality in rainbow-trout ( <i>Oncorhynchus mykiss</i> ).<br><br>Rainbow trout ( <i>Oncorhynchus mykiss</i> ) | TCDD, 12378-PeCDD, 123478-HxCDD, 1234678-HpCDD<br>TCDF, 23478-PeCDF<br>PCB-77, -126, -105, -118<br><br>Exact dosing not clear to me<br><br>Injection | Reproductive effects, fry sac mortality                                                                  | Acute toxicity |
| <b>Zabel et al. (1995b).</b> Interactions of polychlorinated dibenzo- <i>p</i> -dioxin, dibenzofuran, and biphenyl congeners for producing rainbow trout early life stage mortality.<br><br>Rainbow trout                                                                         | Individual PCDD/Fs and DL-PCBs<br><br>Combined exposure to pairs of congeners<br><br>Injection                                                       | Reproductive effects, early life stage mortality                                                         | Acute toxicity |
| <b>Walker et al. (1992).</b> An egg injection method for assessing early life stage mortality of polychlorinated dibenzo- <i>para</i> -dioxins, dibenzofurans, and biphenyls in rainbow-trout ( <i>Oncorhynchus mykiss</i> ).                                                     | TCDD<br><br><u>Injection</u> : 0, 194, 291, 437, 656, 983 pg/g egg                                                                                   | Reproductive effects, mortality, LD50                                                                    |                |

| Reference                                                                                                                                                                       | Compounds<br>Dose regime                                                                                                                                                                                                | Endpoint(s)                                                                                       | Comments                      |
|---------------------------------------------------------------------------------------------------------------------------------------------------------------------------------|-------------------------------------------------------------------------------------------------------------------------------------------------------------------------------------------------------------------------|---------------------------------------------------------------------------------------------------|-------------------------------|
| Rainbow trout ( <i>Oncorhynchus mykiss</i> )                                                                                                                                    | TCDD                                                                                                                                                                                                                    |                                                                                                   |                               |
| <b>Helder (1981)</b> . Effects of 2,3,7,8-tetrachlorodibenzo-dioxin (TCDD) on early life stages of rainbow trout ( <i>Salmo gairdneri</i> , Richardson).                        | Different experiments:<br>(i) eggs<br>(ii) newly hatch fry                                                                                                                                                              | Growth retardation, mortality                                                                     | Aquatic exposure              |
| Rainbow trout                                                                                                                                                                   | Aquatic exposure                                                                                                                                                                                                        |                                                                                                   |                               |
| <b>Akerman et al. (1998)</b> . Studies with oxythiamine to mimic reproduction disorders among fish early life stages.                                                           | PCB-77                                                                                                                                                                                                                  |                                                                                                   |                               |
| Sea trout ( <i>Salmo trutta</i> ), rainbow trout ( <i>Oncorhynchus mykiss</i> )                                                                                                 | 0, 0.5, 5.0, 50 µg/kg controlled exposure                                                                                                                                                                               | Reproductive effects, deformities                                                                 | Mixed exposure – not relevant |
| <b>Ishaq et al (1999)</b> . Organic pollutant characterization and toxicity testing of settling particulate matter by nano-injection in sea trout ( <i>Salmo trutta</i> ) eggs. | Individual PCDD/Fs and DL-PCBs, TEQs by bioassay                                                                                                                                                                        |                                                                                                   |                               |
| Trout ( <i>Salmo trutta</i> )                                                                                                                                                   | Extract of settling particulate matter – exposure to the fraction containing PCDDs, PCDFs, and other planar compounds.                                                                                                  | Reproductive effects, deformities at hatching, larval stages and on the basis of larvae mortality | Mixed exposure – not relevant |
|                                                                                                                                                                                 | TEQs (bioassay)                                                                                                                                                                                                         |                                                                                                   |                               |
| <b>Wright and Tillitt (1999)</b> . Embryotoxicity of Great Lakes lake trout extracts to developing rainbow trout.                                                               | Exposure to lake trout extracts<br><u>Lake Michigan lake trout extract:</u><br>0, 0.02, 0.10, 0.20, 1.0, 2.0, 4.0, 10.0, 20.0 eggEQ/g egg<br><u>Lake Superior lake trout extract:</u><br>0, 0.02, 2.0, 20.0 eggEQ/g egg | Reproductive effects, mortality, gross pathological lesions                                       | Mixed exposure – not relevant |
| Trout                                                                                                                                                                           |                                                                                                                                                                                                                         |                                                                                                   |                               |
| <b>Mac and Edsall (1991)</b> . Environmental contaminants and the reproductive success of lake trout in the Great Lakes: an epidemiological approach.                           | PCB-77                                                                                                                                                                                                                  |                                                                                                   |                               |
| Lake trout                                                                                                                                                                      | Field exposure                                                                                                                                                                                                          | Reproductive effects, swim-up mortality                                                           | Exposure route not relevant   |
| <b>Guiney et al. (2000)</b> . Hemodynamic dysfunction and                                                                                                                       | TCDD                                                                                                                                                                                                                    | Mortality, yolk-sac edema                                                                         | Aquatic                       |

| Reference                                                                                                                                                                                                                                                                            | Compounds<br>Dose regime                                                                                                                                                                                                                    | Endpoint(s)                                                                    | Comments         |
|--------------------------------------------------------------------------------------------------------------------------------------------------------------------------------------------------------------------------------------------------------------------------------------|---------------------------------------------------------------------------------------------------------------------------------------------------------------------------------------------------------------------------------------------|--------------------------------------------------------------------------------|------------------|
| cytochrome P4501A mRNA expression induced by 2,3,7,8-tetrachlorodibenzo- <i>p</i> -dioxin during embryonic stages of lake trout development.<br><br>Lake trout                                                                                                                       | Nominal water concentration of [ <sup>3</sup> H]TCDD ranged from 3 to 100 ppt (ng/L water): 0, 60, 110, 170 ppt<br><br>Waterborne exposure                                                                                                  |                                                                                | exposure         |
| <b>Zabel et al. (1995c).</b> Potency of 3,3',4,4',5-pentachlorobiphenyl (PCB-126), alone and in combination with 2,3,7,8-tetrachlorodibenzo- <i>p</i> -dioxin (TCDD), to produce lake trout early life-stage mortality.<br><br>Lake trout                                            | TCDD, PCB-126<br><br>TCDD: 0, 10, 17, 22, 43, 72, 110, 425 pg/g]<br><br>PCB-126: 141, 13200, 27200, 34600, 39000, 102000 pg/g<br><br>Waterborne exposure                                                                                    | Reproductive effects, cardiovascular effects, musculoskeletal, bone, mortality | Aquatic exposure |
| <b>Guiney et al. (1996).</b> Assessment of 2,3,7,8-tetrachlorodibenzo- <i>p</i> -dioxin induced sac fry mortality in lake trout ( <i>Salvelinus namaycush</i> ) from different regions of the Great Lakes.<br><br>Lake trout ( <i>Salvelinus namaycush</i> )                         | Lake Ontario eggs: [ <sup>3</sup> H]TCDD: 0, 2, 4, 6, 8, 10, 15, 20, 30, 40, 60, 80, 100, 120, 150 ng/L water<br><br>Lake Superior eggs: [ <sup>3</sup> H]TCDD: 10, 20, 40, 62, 100 ng/L water<br><br>Aquatic exposure                      | Reproductive effects, sac fry mortality                                        | Aquatic exposure |
| <b>Walker et al. (1994).</b> Translocation of 2,3,7,8-tetrachlorodibenzo- <i>p</i> -dioxin from adult female lake trout ( <i>Salvelinus namaycush</i> ) to oocytes - effects on early-life stage development and sac fry survival.<br><br>Lake trout ( <i>Salvelinus namaycush</i> ) | TCDD<br><br>Total amounts (11 weeks) provided for the duration of the study:<br>- Tank A: 25.1 µg (4.6 µg from feed, 20.5 µg from minnows)<br>- Tank B: 22.8 µg (15.3 µg from feed, 7.5 µg from minnows)<br>- Tank C: 62.2 µg (46.2 µg from | Reproductive effects                                                           | Aquatic exposure |

| Reference                                                                                                                                                                                                                                          | Compounds<br>Dose regime                     | Endpoint(s)                                                     | Comments         |
|----------------------------------------------------------------------------------------------------------------------------------------------------------------------------------------------------------------------------------------------------|----------------------------------------------|-----------------------------------------------------------------|------------------|
|                                                                                                                                                                                                                                                    | feed, 16.0 µg from minnows)                  |                                                                 |                  |
|                                                                                                                                                                                                                                                    | Waterborne exposure                          |                                                                 |                  |
| <b>Iida et al. (2014)</b> . Transient suppression of AHR activity in early red seabream embryos does not prevent the disruption of peripheral nerve projection by 2,3,7,8-tetrachlorodibenzo- <i>p</i> -dioxin.                                    | TCDD<br>0.1, 1.7, 12 g/L<br>[0.3, 5.3, 37 n] | Reproductive effects, neurotoxicity, hatchability, mortality    | Aquatic exposure |
| Sea bream                                                                                                                                                                                                                                          | Waterborne exposure                          |                                                                 |                  |
| <b>Ortiz-Delgado and Sarasquete (2004)</b> . Toxicity, histopathological alterations and immunohistochemical CYP1A induction in the early life stages of the seabream, <i>Sparus aurata</i> , following waterborne exposure to B(a)P and TCDD.     | TCDD<br>0.025, 0.05, 0.1, 1.5, 5 µg/L        | Histopathological analysis, hatching                            | Aquatic exposure |
| Sea bream ( <i>Sparus aurata</i> )                                                                                                                                                                                                                 | Waterborne exposure                          |                                                                 |                  |
| <b>Yamauchi et al. (2006)</b> . Toxic effects of 2,3,7,8-tetrachlorodibenzo- <i>p</i> -dioxin (TCDD) in developing red seabream ( <i>Pagrus major</i> ) embryo: An association of morphological deformities with AHR1, AHR2 and CYP1A expressions. | TCDD<br>3.1, 6.2, 12.5, 25, 50, 100 g/L      | Mortality, yolk sac edema, body growth, others                  | Aquatic exposure |
| Red seabream ( <i>Pagrus major</i> )                                                                                                                                                                                                               | Waterborne exposure                          |                                                                 |                  |
| <b>Arukwe et al. (2014)</b> . Effects on Development, Growth Responses and Thyroid-Hormone Systems in Eyed-Eggs and Yolk-Sac Larvae of Atlantic Salmon ( <i>Salmo salar</i> ) Continuously Exposed to 3,3',4,4'-Tetrachlorobiphenyl (PCB-77).      | PCB-77<br>0, 1, 10 ng/L                      | Metabolic effects (thyroid function), development, growth,      | Aquatic exposure |
| Atlantic salmon ( <i>Salmo salar</i> )                                                                                                                                                                                                             | Waterborne exposure                          |                                                                 |                  |
| <b>Olufsen and Arukwe (2011)</b> . Developmental effects related to angiogenesis and osteogenic differentiation in Salmon larvae continuously exposed to dioxin-like 3,3',4,4'-tetrachlorobiphenyl (congener 77).                                  | PCB-77<br>0, 1, 10 ng/L                      | Cardiovascular effects, musculoskeletal, bone, growth, survival | Aquatic exposure |
| Salmon                                                                                                                                                                                                                                             | Waterborne exposure                          |                                                                 |                  |



| Reference                                                                                                                                                                                                                                                                        | Compounds<br>Dose regime                                                                                                                                                        | Endpoint(s)                                                               | Comments                |
|----------------------------------------------------------------------------------------------------------------------------------------------------------------------------------------------------------------------------------------------------------------------------------|---------------------------------------------------------------------------------------------------------------------------------------------------------------------------------|---------------------------------------------------------------------------|-------------------------|
| <p><b>Foekema et al. (2014).</b> Internal effect concentrations of organic substances for early life development of egg-exposed fish.</p> <p>Sole</p>                                                                                                                            | <p>PCB-126</p> <p>0.003, 0.01, 0.03 µg/L</p>                                                                                                                                    | <p>Reproductive effects, mortality and disrupted development</p>          | <p>Aquatic exposure</p> |
| <p><b>Buckler et al. (2015).</b> Sensitivity of shovelnose sturgeon (<i>Scaphirhynchus platorynchus</i>) and pallid sturgeon (<i>S. albus</i>) early life stages to 3,3',4,4',5-pentachlorobiphenyl and 2,3,7,8-tetrachlorodibenzo-<i>p</i>-dioxin exposure.</p> <p>Sturgeon</p> | <p>TCDD</p> <p>PCB-126</p> <p>Pallid sturgeon:<br/>0, 60, 194, 383, 671 ng/g egg</p> <p>Shovelnose sturgeon:<br/>2, 87, 213, 1145, 1711 ng/g egg</p> <p>Waterborne exposure</p> | <p>Reproductive effects, develop and morphological effects, mortality</p> | <p>Aquatic exposure</p> |

**Table 104.** Studies on the adverse effects of PCDD/Fs and/or DL-PCBs in poultry *in ovo* (one dose group studies).

| Reference                                                                                                                                                                                                                                                                                   | Compounds       | Dosing                                               |
|---------------------------------------------------------------------------------------------------------------------------------------------------------------------------------------------------------------------------------------------------------------------------------------------|-----------------|------------------------------------------------------|
| <b>Fujisawa et al. (2014).</b> TCDD-induced chick cardiotoxicity is abolished by a selective cyclooxygenase-2 (COX-2) inhibitor NS398.                                                                                                                                                      | TCDD            | 50 pmol TCDD / egg                                   |
| <b>Ivnitski-Steele et al. (2004).</b> 2,3,7,8-Tetrachlorodibenzo- <i>p</i> -dioxin reduces myocardial hypoxia and vascular endothelial growth factor expression during chick embryo development.                                                                                            | TCDD            | 0, 0.24 pmol/g egg on GD0                            |
| <b>Ivnitski-Steele and Walker (2003).</b> Vascular endothelial growth factor rescues 2,3,7,8-tetrachlorodibenzo- <i>p</i> -dioxin inhibition of coronary vasculogenesis.                                                                                                                    | TCDD            | 0, 0.3 pmol/g on GD0                                 |
| <b>Janz and Bellward (1996a).</b> <i>In ovo</i> 2,3,7,8-tetrachlorodibenzo- <i>p</i> -dioxin exposure in three avian species .1. Effects on thyroid hormones and growth during the perinatal period.                                                                                        | TCDD            | 0, 0.1 µg/kg on E4.5                                 |
| <b>Janz and Bellward (1996b).</b> <i>In ovo</i> 2,3,7,8-tetrachlorodibenzo- <i>p</i> -dioxin exposure in three avian species .2. Effects on estrogen receptor and plasma sex steroid hormones during the perinatal period.                                                                  | TCDD            | 0, 0.1 µg/kg on E4.5                                 |
| <b>Walker et al. (1997).</b> Expression of the aryl hydrocarbon receptor (AhR) and AhR nuclear translocator during chick cardiogenesis is consistent with 2,3,7,8-tetrachlorodibenzo- <i>p</i> -dioxin-induced heart defects.                                                               | TCDD            | 0, 1.0 pmol/g egg prior to incubation                |
| <b>Yeager et al. (2006d).</b> 670 nanometer light treatment attenuates dioxin toxicity in the developing chick embryo.                                                                                                                                                                      | TCDD            | 0, 200 ppt on E0                                     |
| <b>Blankenship et al. (2003).</b> Mechanisms of TCDD-induced abnormalities and embryo lethality in white leghorn chickens.                                                                                                                                                                  | TCDD            | 0, 150 pg/g egg                                      |
| <b>Bruggeman et al. (2006).</b> Effect of a single <i>in ovo</i> injection of 2,3,7,8-tetra-chlorodibenzo- <i>p</i> -dioxin on protein expression in liver and ovary of the one-day-old chick analyzed by fluorescent two-dimensional difference gel electrophoresis and mass spectrometry. | TCDD            | 0, 20 ng/egg on ED0                                  |
| <b>Kanzawa et al. (2004).</b> Biochemical and molecular biological analysis of different responses to 2,3,7,8-tetrachlorodibenzo- <i>p</i> -dioxin in chick embryo heart and liver. <i>Archives of Biochemistry and Biophysics</i> . 2004. 427:58-67                                        | TCDD            | 0, 1.0 pmol/g egg                                    |
| <b>Hilscherova et al. (2003).</b> Oxidative stress in liver and brain of the hatchling chicken ( <i>Gallus domesticus</i> ) following <i>in ovo</i> injection with TCDD.                                                                                                                    | TCDD            | 0, 150 pg/g egg                                      |
| <b>Stanton et al. (2003).</b> Fatty acid metabolism in neonatal chickens ( <i>Gallus domesticus</i> ) treated with 2,3,7,8-tetrachlorodibenzo- <i>p</i> -dioxin (TCDD) or 3,3',4,4',5-pentachlorobiphenyl (PCB-126) <i>in ovo</i> .                                                         | TCDD<br>PCB-126 | TCDD: 0, 0.2 mg/kg egg<br>PCB-126: 0, 1.0 mg/kg egg  |
| <b>Katynski et al. (2004).</b> 3,3',4,4',5-Pentachlorobiphenyl (PCB 126) impacts hepatic lipid peroxidation, membrane fluidity and beta-adrenoceptor kinetics in chick embryos.                                                                                                             | PCB-126         | 0, 1.6 µg/kg                                         |
| <b>Roelens et al. (2005).</b> The dioxin-like PCB 77 but not the ortho-substituted PCB 153 interferes with chicken embryo thyroid hormone homeostasis and delays hatching.                                                                                                                  | PCB-77          | Experiment 1: 1 µg + PCB153<br>Experiment 2: 0, 1 µg |
| <b>Beck et al. (2006).</b> Exposure to PCB 77 induces tissue-dependent changes in iodothyronine deiodinase activity patterns in the embryonic chicken.                                                                                                                                      | PCB-77          | 1 µg on day 4 of incubation                          |

### A.11.7. Studies in cats and dogs

**Table 105.** Studies identified on the adverse effects of PCDD/Fs and/or DL-PCBs in cats and/or dogs

| Reference                                                                                                                                          | Compounds                              | Endpoint(s)                                                                                                                                                                                                                                                                                                                                                                                                                | Comments                                                                                                                                                         |
|----------------------------------------------------------------------------------------------------------------------------------------------------|----------------------------------------|----------------------------------------------------------------------------------------------------------------------------------------------------------------------------------------------------------------------------------------------------------------------------------------------------------------------------------------------------------------------------------------------------------------------------|------------------------------------------------------------------------------------------------------------------------------------------------------------------|
| <p><b>Schwetz et al. (1973).</b><br/>Toxicology of chlorinated dibenzo-<i>p</i>-dioxins.</p> <p>Dog (Beagle) (M and F, two of each)</p>            | <p>TCDD<br/>0.3, 3 mg/kg<br/>Oral</p>  | <p><b>Lethality:</b><br/>(n death/n treated)<br/>M: At 0.3 mg/kg: 0/2<br/>At 3 mg/kg: 2/2<br/>F: At 0.03 mg/kg: 0/2<br/>At 0.33 mg/kg: 0/2</p>                                                                                                                                                                                                                                                                             | <p>NOEL = 0.3 mg/kg/bw<br/>There is insufficient information provided to be used in the risk assessment.<br/><i>Study not useful for the risk assessment</i></p> |
| <p><b>Kimbrough et al. (1977).</b><br/>Epidemiology and pathology of a tetrachlorodibenzodioxin poisoning episode.</p> <p><a href="#">Cats</a></p> | <p>PCDD/Fs?<br/><i>Case report</i></p> | <p>Autopsies of 2 cats:<br/>Severe emaciation, skin lesions, alopecia, edema, ascites. Adipose tissue was absent.<br/>Liver: degeneration of liver cells. Fibrosis in the periphery of the lobules, proliferation of bile ducts, enlarged Kupffer cells, pleomorphic hepatocytes. Atrophic spleen.<br/>Degenerative changes in the kidneys. Interstitial fibrosis and acute focal interstitial nephritis (in one cat).</p> | <p><i>Study not suitable for the risk assessment</i></p>                                                                                                         |

### A.11.8. Studies in fur animals

**Table 106.** Studies on the effects of the target compounds in mink: studies with animal feed supplemented with pre-designed concentrations of PCDD/Fs and/or DL-PCBs

| Reference                                                                                                                                                                      | Compounds<br>Dose Regime                                                                                                                                                        | Results                                                                                                                                                                                                                                                             | NOAEL (or LOAEL)                                                                                                                                          |
|--------------------------------------------------------------------------------------------------------------------------------------------------------------------------------|---------------------------------------------------------------------------------------------------------------------------------------------------------------------------------|---------------------------------------------------------------------------------------------------------------------------------------------------------------------------------------------------------------------------------------------------------------------|-----------------------------------------------------------------------------------------------------------------------------------------------------------|
| <b>Aulerich et al. (1985).</b><br>Toxicological manifestations of 2,4,5,-2',4',5'-, 2,3,6,2',3',6'-, and 3,4,5,3',4',5'-hexachlorobiphenyl and Aroclor 1254 in mink.           | PCB-169<br><i>Reproductive study</i><br><br>Mink (n=90, F) were fed diets that contained PCB-169 at 0, 0.1 or 0.5 mg/kg feed from 1 month prior to breeding through parturition | All mink fed 0.5 mg/kg feed PCB-169 died within 60 days, while those fed 0.1 mg/kg feed (300 ng WHO <sub>2005</sub> TEQ/kg bw/day) showed 50% mortality after 3 months of exposure (control: 0%)                                                                    | Based on mortality,<br><br>LOAEL=300 ng WHO <sub>2005</sub> -TEQ/kg bw/day                                                                                |
| <b>Aulerich et al. (1987).</b><br>Toxicity of 3,4,5,3',4',5'-Hexachlorobiphenyl to mink.                                                                                       | PCB-169<br><i>Sub-chronic study</i><br><br>Mink (n=50, F) were fed diets supplemented with PCB-169 at 0.05 or 0.01 mg/kg feed                                                   | In the 0.05 mg/kg feed group, 50% (5/10) of the minks died (in pair-fed and ad-libitum controls, 20% and in 0.01 mg/kg feed, 0%).<br><br>At 0.01 mg/kg feed, liver, kidney and adrenal weights were increased and serum concentrations of T3 and free T3 decreased. | Based on changes in organ weights and thyroid hormone levels,<br><br>LOAEL=0.01 mg/kg feed, corresponding to 30 ng WHO <sub>2005</sub> -TEQ/kg bw per day |
| <b>Aulerich et al. (1988).</b><br>Biological Effects of Epidermal Growth Factor and 2,3,7,8-tetrachlorodibenzo- <i>p</i> -dioxin on developmental parameters of neonatal mink. | TCDD<br><i>Post-natal developmental study</i><br><br>Newborn mink (n=82, M, F) were administered TCDD at 0.1 or 1 µg/kg bw/day by <i>i.p.</i> injection for 12 consecutive days | The higher dose of TCDD caused mortality (>50%) while the lower one reduced body weight gain                                                                                                                                                                        | Based on retarded growth,<br><br>LOAEL=100 ng TCDD/kg bw/day                                                                                              |
| <b>Hochstein et al. (1988).</b><br>Acute toxicity of 2,3,7,8-tetrachlorodibenzo- <i>p</i> -dioxin to mink.                                                                     | TCDD<br><i>Acute study</i><br><br>Mink (n=16, M) were administered TCDD once <i>p.o.</i> at 0, 2.5, 5.0, or 7.5 µg/kg bw. Minks were observed for 28 days                       | Body weight decreased significantly vs. control already at the lowest dose.                                                                                                                                                                                         | Based on decreased body weight,<br><br>LOAEL=2.5 µg TCDD/kg bw                                                                                            |
| <b>Hochstein et al. (1998).</b><br>Effects of Dietary Exposure to 2,3,7,8-Tetrachlorodibenzo- <i>p</i> -dioxin in Adult Female Mink                                            | TCDD<br><i>Sub-chronic study</i><br><br>Adult mink (n=56, F) distributed among six dietary concentrations of TCDD (8 mink/group) at 0, 1, 10,                                   | Band (immature) neutrophils significantly greater (without a clear dose-response) in all TCDD treatment groups relative to controls, suggesting low-grade inflammation. However, no change in mature (segmented) or total neutrophils.                              | Based on mortality and body weight loss:<br><br>NOAEL=100 ng/kg feed, corresponding to 5.5 ng                                                             |

| Reference                                                                                                                     | Compounds<br>Dose Regime                                                                                                                                                                                                                                                                       | Results                                                                                                                                                                                                                                                                                                                                                                                                                                                                                                                                                                                                                                                                                                                                                                                                           | NOAEL (or LOAEL)                                                                                                                                |
|-------------------------------------------------------------------------------------------------------------------------------|------------------------------------------------------------------------------------------------------------------------------------------------------------------------------------------------------------------------------------------------------------------------------------------------|-------------------------------------------------------------------------------------------------------------------------------------------------------------------------------------------------------------------------------------------------------------------------------------------------------------------------------------------------------------------------------------------------------------------------------------------------------------------------------------------------------------------------------------------------------------------------------------------------------------------------------------------------------------------------------------------------------------------------------------------------------------------------------------------------------------------|-------------------------------------------------------------------------------------------------------------------------------------------------|
| ( <i>Mustela vison</i> ).                                                                                                     | 100, 1,000, 10,000 and 100,000 ng/kg feed. Mink fed the diets for up to 125 days.                                                                                                                                                                                                              | Mink in all groups, including control, lost body weight during 18 week exposure period, with some surviving animals losing more than 30% of initial weight (final body weight was significantly decreased in survivors of the 1,000 ng/kg group). Significant mortality in the 1,000, 10,000 and 100,000 ng/kg groups (62.5, 100 and 100%, respectively, by day 125).<br><br>Cortisol and thyroid hormone concentrations altered in treated mink at dose levels of 10 and 100 ng/kg surviving to study termination, but not in a statistically significant manner. However, a general dose-dependent upward tendency in plasma T4, free T4 and free T3 and a downward tendency in plasma cortisol.                                                                                                                | TCDD/kg bw per day                                                                                                                              |
| 159 - Hochstein et al. (2001). Chronic toxicity of dietary 2,3,7,8-TCDD to mink.                                              | TCDD<br><i>Reproductive study</i><br><br>Adult mink (n=60, F) administered diets containing TCDD at 0.6 (control), 16, 53, 180, or 1,400 ng/kg feed for 131-132 days. Exposed F mink mated with unexposed M on days 35-64 following start of TCDD treatment.                                   | Mating and reproduction: no F mink in 16 or 1,400 ng/kg feed groups whelped. Also control whelping rate poor (5/12). At euthanasia, evidence of resorbed fetuses in uteri of two F mink from highest dose group (1,400 ng/kg feed).<br><br>In groups where kits were whelped, a decrease in kit body weights at 180 ng/kg feed at birth, but not at 3 or 6 weeks. Three-week survival rates for control, 53 and 180 ng/kg feed groups were 83%, 47% and 11%, respectively. Kits that survived to 6 weeks of age appeared normal.<br><br>Statistically significant dose-dependent decrease in F1 serum total solids and white blood cell count identified in 180 and 1,400 ng/kg feed groups, relative to controls. In serum, iron concentration decreased and total carbon dioxide level increased in all groups. | Based on clinical chemistry findings,<br><br>LOAEL=16 ng/kg feed, corresponding to 1.6 ng TCDD/kg bw per day                                    |
| Beckett et al. (2008). The effects of PCB 126 on mink ( <i>Mustela vison</i> ) reproduction and kit survivability and growth. | PCB-126<br>WHO <sub>2005</sub> -TEQs<br><i>Reproductive study</i><br><br>Mink (n=28, F) administered 0, 0.24, 2.4, and 24 µg PCB-126/kg feed from 21 days prior to breeding until weaning of kits at six weeks of age, corresponding to 0, 24, 240, 2,400 ng WHO <sub>2005</sub> -TEQ/kg feed. | No significant differences in number of F mink that whelped or average litter size between control group and 24 ng WHO <sub>2005</sub> -TEQ/kg feed group.<br><br>F mink at two highest dose groups (240 and 2,400 ng WHO <sub>2005</sub> -TEQ/kg feed) that had confirmed matings, failed to whelp and fetal implantation sites or placental scars, indicating partial fetal development, were identified by histological examination of their uterine horns.                                                                                                                                                                                                                                                                                                                                                    | Based on fertility outcome,<br><br>NOAEL=24 ng WHO <sub>2005</sub> -TEQ/kg feed, corresponding to 2.4 ng WHO <sub>2005</sub> -TEQ/kg bw per day |

| Reference                                                                                                                                                                                          | Compounds<br>Dose Regime                                                                                                                                                                                                                                                                                                                                                                                                                                                                                                                                                                                                                                                     | Results                                                                                                                                                                                                                                                                                                                                                                                                   | NOAEL (or LOAEL)                                                                                                                                                          |
|----------------------------------------------------------------------------------------------------------------------------------------------------------------------------------------------------|------------------------------------------------------------------------------------------------------------------------------------------------------------------------------------------------------------------------------------------------------------------------------------------------------------------------------------------------------------------------------------------------------------------------------------------------------------------------------------------------------------------------------------------------------------------------------------------------------------------------------------------------------------------------------|-----------------------------------------------------------------------------------------------------------------------------------------------------------------------------------------------------------------------------------------------------------------------------------------------------------------------------------------------------------------------------------------------------------|---------------------------------------------------------------------------------------------------------------------------------------------------------------------------|
| <b>Moore et al. (2009).</b><br>Hepatic P450 Enzyme Activity, Tissue Morphology and Histology of Mink ( <i>Mustela vison</i> ) Exposed to Polychlorinated Dibenzofurans.                            | TCDF, 2,3,4,5,7,8-PeCDF<br>WHO <sub>2005</sub> -TEQs<br><i>Sub-chronic study</i><br><br>Mink (n=50, F) were distributed among 8 treatments groups (6 mink in each of the 7 dosed groups, and 8 mink in the control group) being exposed (in feed) to:<br><br>TCDF: 0.98, 3.8, 20 ng WHO <sub>2005</sub> -TEQ/kg bw/day<br>PeCDF: 0.62, 2.2, 9.5 ng WHO <sub>2005</sub> -TEQ/kg bw/day<br>TCDF/PeCDF mixture:<br>4.1 ng WHO <sub>2005</sub> -TEQ/kg bw/day (TCDF)<br>2.8 ng WHO <sub>2005</sub> -TEQ/kg bw/day (PeCDF)                                                                                                                                                        | No statistically significant treatment related changes in gross morphology or histology (jaws, liver, kidney, spleen), although fatty liver was only detected in (a few) exposed mink).<br><br>Hepatic EROD activity increased at all PeCDF doses, at two highest TCDF doses, and by mixture. No morphological changes could be linked to exposures.                                                      | Based on morphological changes,<br><br>NOAEL for TCDF=20 ng WHO <sub>2005</sub> -TEQ/kg bw per day<br><br>NOAEL for PeCDF=9.5 ng WHO <sub>2005</sub> -TEQ/kg bw per day   |
| <b>Moore et al. (2012).</b><br>Effects of dietary exposure of mink ( <i>Mustela vison</i> ) to 2,3,7,8-TCDD, 2,3,4,7,8-PeCDF, and 2,3,7,8-TCDF on reproduction and offspring viability and growth. | TCDD, TCDF, 2,3,4,7,8-PeCDF<br>WHO <sub>2005</sub> -TEQs<br><i>Reproductive study</i><br><br>Mink (n=117, F) received targeted dietary concentrations of TCDD, PeCDF and TCDF in feed (9 mink/group) corresponding to<br><br>(ng WHO <sub>2005</sub> -TEQ/kg feed):<br>TCDD: 23, 53, 77, 101<br>TCDF: 68, 146, 240, 287<br>PeCDF: 50, 86, 109, 186<br><br>(ng WHO <sub>2005</sub> -TEQ/kg bw per day):<br>TCDD: 2.1, 4.6, 6.0, 8.4<br>TCDF: 5.2, 12, 21, 25<br>PeCDF: 4.0, 7.6, 9.0, 15<br><br>Adult F mink exposed for 5-6 months. Kits exposed <i>in utero</i> and via lactation until weaning; some kits additionally through the age of 27 weeks via lactation and diet. | No significant effects on reproductive performance.<br><br>In 27-week-old male mink, relative liver size increased at the highest doses of PeCDF and TCDF while relative spleen and adrenal weights increased at the highest dose of TCDD (but were not accompanied by histopathological changes). Liver, heart and thyroid mineralization increased at 25 ng WHO <sub>2005</sub> -TEQ/kg bw/day of TCDF. | Based on tissue morphology in mink treated with TCDF,<br><br>NOAEL=240 ng WHO <sub>2005</sub> -TEQ/kg feed, corresponding to 21 ng WHO <sub>2005</sub> -TEQ/kg bw per day |
| <b>Bursian et al. (2012).</b><br>Incidence of jaw lesions and activity and gene expression of hepatic                                                                                              | TCDD, TCDF, 2,3,4,7,8-PeCDF<br>WHO <sub>2005</sub> -TEQs<br><i>Reproductive study</i>                                                                                                                                                                                                                                                                                                                                                                                                                                                                                                                                                                                        | Histopathological assessment of the mandible and maxilla of 27-week-old juvenile mink indicated the presence of jaw lesions (gingival epithelial proliferation and cysts) in mink exposed to TCDD, TCDF, or PeCDF.                                                                                                                                                                                        | Based on jaw lesions in mink treated with TCDD,<br><br>NOAEL=2.1 ng TCDD/kg                                                                                               |

| Reference                                                                                                           | Compounds<br>Dose Regime                                                                                                                                                                                                                                                                                                                                                                                                                                                                                                                                                           | Results                                                                                                                                                                                                                                                                                              | NOAEL (or LOAEL)                                                                                                          |
|---------------------------------------------------------------------------------------------------------------------|------------------------------------------------------------------------------------------------------------------------------------------------------------------------------------------------------------------------------------------------------------------------------------------------------------------------------------------------------------------------------------------------------------------------------------------------------------------------------------------------------------------------------------------------------------------------------------|------------------------------------------------------------------------------------------------------------------------------------------------------------------------------------------------------------------------------------------------------------------------------------------------------|---------------------------------------------------------------------------------------------------------------------------|
| P4501A enzymes in mink ( <i>Mustela vison</i> ) exposed to dietary 2,3,7,8-TCDD, 2,3,7,8-TCDF, and 2,3,4,7,8-PeCDF. | <p>Mink (n=117, F) received targeted dietary concentrations of TCDD, PeCDF or TCDF in feed (9 mink/group) corresponding to</p> <p>(ng WHO<sub>2005</sub>-TEQ/kg feed):<br/>TCDD: 23, 53, 77, 101<br/>TCDF: 68, 146, 240, 287<br/>PeCDF: 50, 86, 109, 186</p> <p>(ng WHO<sub>2005</sub>-TEQ/kg bw per day):<br/>TCDD: 2.1, 4.6, 6.0, 8.4<br/>TCDF: 5.2, 12, 21, 25<br/>PeCDF: 4.0, 7.6, 9.0, 15</p> <p>Adult F mink were exposed for 5-6 months. Kits exposed <i>in utero</i> and via lactation until weaning. Some kits additionally through the age of the 27 weeks via diet.</p> | <p>Jaw lesion severity was predominantly mild to moderate, expect for one animal at the highest PeCDF dose (15 ng WHO-TEQ/kg bw per day) whose lesion score was severe.</p> <p>Jaw lesions occurred dose-dependently in all other groups except for control and the lowest TCDD treatment group.</p> | <p>bw/day</p> <p>(LOAELs for TCDF and 2,3,4,7,8-PeCDF: 5.2 and 4.0 ng WHO<sub>2005</sub>-TEQ/kg bw/day, respectively)</p> |

F: female; M: male.

**Table 107.** Studies on the effects of the target compounds in mink: feeding studies with fish contaminated with PCDD/Fs, DL-PCBs and other pollutants

| Reference                                                                                                                                                                                                           | Compounds                                                                                                                                                                                                             | Dose Regime                                                                                          | Results                                                                                                                                                                                                                                                                                                          | NOAEL (or LOAEL)                                                                                                                                                                                          |
|---------------------------------------------------------------------------------------------------------------------------------------------------------------------------------------------------------------------|-----------------------------------------------------------------------------------------------------------------------------------------------------------------------------------------------------------------------|------------------------------------------------------------------------------------------------------|------------------------------------------------------------------------------------------------------------------------------------------------------------------------------------------------------------------------------------------------------------------------------------------------------------------|-----------------------------------------------------------------------------------------------------------------------------------------------------------------------------------------------------------|
| <b>Heaton et al. (1995a).</b><br>Dietary exposure of mink to carp from Saginaw Bay, Michigan. 1. Effects on reproduction and survival, and the potential risks to wild mink populations.                            | BEQs (bioassay)<br><i>Reproductive study</i>                                                                                                                                                                          |                                                                                                      | Gestation length was shortened in all three treatment groups. The weight of kits was reduced at the highest dose at birth and at all doses at 3 and 6 weeks.                                                                                                                                                     | Based on adverse effects on gestation length, kit survival and growth rate as well as relative organ weights,                                                                                             |
|                                                                                                                                                                                                                     | Mink (n=60, M, F) were randomly assigned to five treatment groups (15 animals per group) fed diets containing carp at 0.015 (control), 0.72, 1.53, and 2.56 mg PCBs/kg diet, or 1, 19, 40 and 81 ng BEQ/kg diet.      | Animals were fed on these diets prior to and throughout the reproductive period (182 days in total). | F mink fed the highest dose whelped the fewest number of kits, all of which were stillborn or died within 24 hours.                                                                                                                                                                                              | LOAEL=19 ng BEQ/kg diet, corresponding to 3.6 ng BEQ/kg bw/day                                                                                                                                            |
|                                                                                                                                                                                                                     | The total BEQs ingested by the mink over the treatment period were 23, 360, 660, and 1,000 ng BEQ/mink, respectively.                                                                                                 |                                                                                                      | A number of relative organ weights were altered in adult and/or kit mink in all treatment groups.                                                                                                                                                                                                                |                                                                                                                                                                                                           |
| <b>Heaton et al. (1995b).</b><br>Dietary exposure of mink to carp from Saginaw Bay, Michigan: 2. Hematology and liver pathology.                                                                                    | BEQs (bioassay)<br><i>Sub-chronic study</i>                                                                                                                                                                           |                                                                                                      | Treated mink showed a general dose-dependent occurrence of listlessness, nervousness when approached, anorexia, and melena.                                                                                                                                                                                      |                                                                                                                                                                                                           |
|                                                                                                                                                                                                                     | Mink (n=60, M, F) were randomly assigned to five treatment groups (15 animals per group) fed diets containing carp at 0.015 (control), 0.72, 1.53, and 2.56 mg PCBs/kg diet, or 0, 1.0, 19, 40 and 81 ng BEQ/kg diet. | Animals were fed on these diets prior to and throughout the reproductive period (182 days in total). | Erythrocyte counts were lower in all mink exposed to the diets compared to controls, while the number of white blood cells was larger than in controls.                                                                                                                                                          | Based on haematological changes,                                                                                                                                                                          |
|                                                                                                                                                                                                                     | The total BEQs ingested by the mink over the treatment period were 23, 360, 660, and 1,000 ng BEQ/mink, respectively.                                                                                                 |                                                                                                      | Significant differences ( $p < 0.05$ ) in the concentrations of neutrophils, lymphocytes, monocytes, and eosinophils were observed between the control and carp-fed groups. Haematocrit values for the mink fed the two highest dose groups were significantly lower than in controls and the lowest dose group. | LOAEL was the same as in the previous study                                                                                                                                                               |
| <b>Restum et al. (1998).</b><br>Multigenerational study of the effects of consumption of PCB-contaminated carp from Saginaw Bay, Lake Huron, on mink. 1. Effects on mink reproduction, kit growth and survival, and | 17 PCDD/Fs, 12 DL-PCBs<br>The diet also contained other contaminants (e.g. metals, pesticides, NDL-PCBs with levels reported)<br><i>Mutigenerational study</i>                                                        |                                                                                                      | All doses, including the lowest dose reduced vulvar swelling in P1 and F1-1 generations and F1-1 kits' body weight gain at 3 and 6 weeks.                                                                                                                                                                        | Carp calculated to contain 120 ng WHO <sub>2005</sub> -TEQ/kg and 8.4 mg PCBs/kg, so 14.3 ng WHO <sub>2005</sub> -TEQ/mg PCBs. Thus, 0.25 mg/kg PCBs in feed equals to 3.6 ng WHO <sub>2005</sub> -TEQ/kg |
|                                                                                                                                                                                                                     | Mink (n=96, M and F) randomly assigned to 4 dietary groups (24 animals per group) (P1) fed diets containing carp at 0 (control), 0.25, 0.5 or 1.0 mg/kg PCBs for 6 months. Mink mated within their                    |                                                                                                      | The lowest dose also increased spleen weight in F1-1 animals and caused hepatocellular lipidosis in P1 mink.                                                                                                                                                                                                     |                                                                                                                                                                                                           |



| Reference                                                                                                                                                                                                                                                            | Compounds                                              | Dose Regime                                                                                                                                                                                                                                                                                                                                                                                                                                                                                                                                                                                                                                     | Results                                                                                                                                                                                                                                                                                                                                                                                                                                                              | NOAEL (or LOAEL)                                                                                                                                                                               |
|----------------------------------------------------------------------------------------------------------------------------------------------------------------------------------------------------------------------------------------------------------------------|--------------------------------------------------------|-------------------------------------------------------------------------------------------------------------------------------------------------------------------------------------------------------------------------------------------------------------------------------------------------------------------------------------------------------------------------------------------------------------------------------------------------------------------------------------------------------------------------------------------------------------------------------------------------------------------------------------------------|----------------------------------------------------------------------------------------------------------------------------------------------------------------------------------------------------------------------------------------------------------------------------------------------------------------------------------------------------------------------------------------------------------------------------------------------------------------------|------------------------------------------------------------------------------------------------------------------------------------------------------------------------------------------------|
| selected biological parameters.                                                                                                                                                                                                                                      |                                                        | respective dietary groups. The first year F1 generation (F1-1) kits weaned at 6 weeks of age and half of the P1 mink switched (except controls) to control diet while other half remained on their respective treatment diet and continued on the trial for a 2 <sup>nd</sup> reproductive season. F1-1 mink whelped by P1 females exposed to either 0, 0.25, 0.5 or 1.0 mg/kg feed PCBs for 6 months. Half of the kits switched from their parents' diet to control diet after weaning, while other half remained on their parents' diet throughout study. F1-1 mink continued on trial through reproductive season and whelped F2 generation. |                                                                                                                                                                                                                                                                                                                                                                                                                                                                      | feed <sup>(a)</sup><br><br>Based on reduced vulvar swelling and body weight gain,<br><br>LOAEL=0.25 mg/kg, corresponding to about 0.4 ng WHO <sub>2005</sub> -TEQ/kg bw per day <sup>(b)</sup> |
| <b>Bursian et al. (2006a).</b><br>Dietary exposure of mink ( <i>Mustela vison</i> ) to fish from the Housatonic River, Berkshire County, Massachusetts, USA: Effects on reproduction, kit growth, and survival.                                                      | WHO <sub>1998</sub> -TEQs<br><i>Reproductive study</i> | Mink (n=72, F) randomly assigned to 6 treatment groups (12 mink/group), receiving about 1 month prior to mating diets containing goldfish and carp at concentrations equivalent to 1.1 (control diet), 3.5, 5.7, 9.2 16.1, 68.5 ng WHO <sub>1998</sub> -TEQ/kg.<br><br>Mink fed on diets for two months before breeding through weaning of kits. Twelve kits from each treatment group maintained on their respective diets for an additional 180 days.                                                                                                                                                                                         | At 6 weeks of age, survival of kits in the highest dose group (68.5 ng WHO <sub>1998</sub> -TEQ/kg) significantly lower compared with control kits and the 16.1 ng WHO <sub>1998</sub> -TEQ/kg group (p=0.0391).<br><br>At birth, kits in the 5.7 ng WHO <sub>1998</sub> -TEQ/kg group had significantly greater body weights (p=0.0106) when compared with kits in the control group and all other groups from birth to 6 weeks, but this may have been incidental. | Based on kit mortality,<br><br>NOAEL=16.1 ng WHO <sub>1998</sub> -TEQ/kg feed for kit survival, corresponding to 1.6 ng WHO <sub>1998</sub> -TEQ/kg bw per day                                 |
| <b>Bursian et al. (2006b).</b><br>Dietary exposure of mink ( <i>Mustela vison</i> ) to fish from the Housatonic River, Berkshire County, Massachusetts, USA: Effects on organ weights and histology and hepatic concentrations of PCBs and 2,3,7,8-TCDD equivalence. | WHO <sub>1998</sub> -TEQs<br><i>Reproductive study</i> | Mink (n=72, F) randomly assigned to 6 treatment groups (12 mink/group), receiving for 1 month prior to mating, diets containing goldfish and carp at concentrations equivalent to 1.1 (control diet), 3.5, 5.7, 9.2 16.1, 68.5 ng WHO <sub>1998</sub> -TEQ/kg.<br><br>Mink fed on the diets 8 weeks prior to breeding through weaning of kits. Offspring maintained on their respective diets for an additional 180 days.                                                                                                                                                                                                                       | Dose-dependent maxillary and/or mandibular squamous cell proliferation: 1/6 juveniles, 2/6 juveniles, and 6/6 juveniles in the 9.2, 16.1, and 68.5 ng WHO <sub>1998</sub> -TEQ/kg groups, respectively.                                                                                                                                                                                                                                                              | Based on jaw lesions,<br><br>NOAEL=5.7 ng WHO <sub>1998</sub> -TEQ/kg feed, corresponding to 0.6 ng WHO <sub>1998</sub> -TEQ/kg bw per day                                                     |
| <b>Bursian et al. (2006c).</b><br>Assessment of effects in mink caused by consumption of carp collected from the Saginaw River, Michigan, USA.                                                                                                                       | WHO <sub>1998</sub> -TEQs<br><i>Reproductive study</i> | Mink (n=40, F) randomly assigned to 4 treatment groups (10 mink/group), receiving diets containing contaminated carp equivalent to 2.5 (control diet), 28, 47, 73 ng WHO <sub>1998</sub> -TEQ/kg.<br><br>Mink fed on diets for 3 weeks prior to breeding through weaning of                                                                                                                                                                                                                                                                                                                                                                     | Mandibular and maxillary squamous cell proliferation observed at 48 and 73 ng WHO <sub>1998</sub> -TEQ/kg, but not at 28 ng WHO <sub>1998</sub> -TEQ/kg                                                                                                                                                                                                                                                                                                              | Based on jaw lesions,<br><br>NOAEL=28 ng WHO <sub>1998</sub> -TEQ/kg feed, corresponding to 2.8 ng WHO <sub>1998</sub> -TEQ/kg bw per day                                                      |

| Reference                                                                                                                                                                                           | Compounds                                                                               | Dose Regime                                                                                                                                                                                                                                                                                                                                                                                                                                                  | Results                                                                                                                                                                                                                                                                                                                                                                                                                                                                                                                                                                                                                                                                                          | NOAEL (or LOAEL)                                                                                                                                                                                                                               |
|-----------------------------------------------------------------------------------------------------------------------------------------------------------------------------------------------------|-----------------------------------------------------------------------------------------|--------------------------------------------------------------------------------------------------------------------------------------------------------------------------------------------------------------------------------------------------------------------------------------------------------------------------------------------------------------------------------------------------------------------------------------------------------------|--------------------------------------------------------------------------------------------------------------------------------------------------------------------------------------------------------------------------------------------------------------------------------------------------------------------------------------------------------------------------------------------------------------------------------------------------------------------------------------------------------------------------------------------------------------------------------------------------------------------------------------------------------------------------------------------------|------------------------------------------------------------------------------------------------------------------------------------------------------------------------------------------------------------------------------------------------|
| <b>Martin et al. (2006).</b><br>Changes in thyroid and vitamin A status in mink fed polyhalogenated-aromatic-hydrocarbon-contaminated carp from the Saginaw River, Michigan, USA.                   |                                                                                         | the resulting offspring at 6 weeks. Eight kits from each group further maintained on diets until 27 weeks of age.                                                                                                                                                                                                                                                                                                                                            |                                                                                                                                                                                                                                                                                                                                                                                                                                                                                                                                                                                                                                                                                                  |                                                                                                                                                                                                                                                |
|                                                                                                                                                                                                     | WHO <sub>1998</sub> -TEQs<br><i>Developmental study</i>                                 | Mink (n=40, F) randomly assigned to 4 treatment groups (10 mink/group) and fed diets that contained 0% (control), 10%, 20% or 30% wild carp (equivalent to 3.4 (control), 27.9, 47.6, and 73.2 ng WHO <sub>1998</sub> -TEQ/kg feed, respectively).<br><br>Mink fed 3 weeks prior to breeding through weaning. The weaned kits were continued on diets until 27 weeks of age.                                                                                 | Reductions in plasma retinyl palmitate and total esters (in juvenile females) and in kidney total retinyl esters (in kits and juvenile mink) observed at all dose levels.<br><br>In 6-week-old kits, T4 and free T4 were increased at the lowest dose only versus control and were thus not deemed dose-related.                                                                                                                                                                                                                                                                                                                                                                                 | Based on thyroid hormones,<br><br>NOAEL=73.2 ng WHO <sub>1998</sub> -TEQ/kg feed, corresponding to 7.3 ng WHO <sub>1998</sub> -TEQ/kg bw per day                                                                                               |
| <b>Bursian et al. (2013a).</b><br>Dietary exposure of mink ( <i>Mustela vison</i> ) to fish from the upper Hudson River, New York, USA: Effects on reproduction and offspring growth and mortality. | 17 PCDD/Fs,<br>12 DL-PCBs<br><br>WHO <sub>2005</sub> -TEQs<br><i>Reproductive study</i> | Minks (n=105, M and F) fed diets containing contaminated fish (carp) at 0, 2.5, 5.0, 10, 15 and 20% of total diet, corresponding to measured concentrations of total PCBs of 0.0074, 0.72, 1.5, 2.8, 4.5 and 6.1 mg/kg feed (corresponding to 0.41, 4.8, 10, 18, 28 and 38 ng WHO <sub>2005</sub> -TEQ/kg feed).<br><br>Exposure started about two months prior to breeding and continued up to the age of 7 months for some of the offspring.               | Mean number of kits whelped alive per litter reduced in the high dietary group (p<0.04). Percentage of F whelping at least one kit was 100% in the control, 4.8 and 10 ng WHO <sub>2005</sub> -TEQ/kg feed groups, and 90, 87, and 73% for F in the three highest dose groups. Compared to controls, mean number of kits whelped alive per litter was 44% less (CI 17–63%, p=0.0039) in the 28 ng WHO <sub>2005</sub> -TEQ/kg feed group and 49% less (CI 21–67%, p=0.0023) in the highest dose group. Kit mortality increased over time, ultimately resulting in no kits surviving to end of trial with exception of those in control and in the 4.8 ng WHO <sub>2005</sub> -TEQ/kg feed group. | Based on kit mortality,<br><br>NOAEL= 0.72 mg/kg total PCBs, corresponding to 4.8 ng TEQ <sub>2005</sub> /kg feed.<br><br>Using the conversion factor of 100 g feed/kg bw, this is equivalent to 0.5 ng WHO <sub>2005</sub> -TEQ/kg bw per day |
|                                                                                                                                                                                                     | WHO <sub>2005</sub> -TEQs<br><i>Developmental and sub-chronic study</i>                 | Mink (n=105, M and F) randomly assigned to 6 treatment groups (between 15-20 mink/group) treated beginning two months before breeding and continuing through gestation, lactation, and early kit growth for 170 days and, for some kits, for a further 170 days, with diets containing carp incorporated into basal mink diet at 0, 2.5, 5.0, 10, 15 and 20% of total diet (equivalent to 0.41, 4.8, 10, 18, 28 and 38 ng WHO <sub>2005</sub> -TEQ/kg feed). | Mandibular and/or maxillary squamous cell hyperplastic foci occurred dose-dependently in all exposed groups but not in controls.                                                                                                                                                                                                                                                                                                                                                                                                                                                                                                                                                                 | Based on jaw lesions,<br><br>LOAEL=4.8 ng WHO <sub>2005</sub> -TEQ/kg feed, corresponding to 0.5 ng WHO <sub>2005</sub> -TEQ/kg bw per day                                                                                                     |

F: female; M: male.

(a): The TEQ content was not provided in the paper but calculated by the CONTAM Panel based on the data shown in Table 1.

(b): Based on the studies of Moore et al. (2012), Bleavins and Auerlich (1981), and Bursian et al. (2013), the average daily feed intake level was estimated at 100 g/kg bw.

## References

- Ábalos M, Abad E, Estevez A, Sole M, Buet A, Quiros L, Pina B and Rivera J, 2008. Effects on growth and biochemical responses in juvenile gilthead seabream '*Sparus aurata*' after long-term dietary exposure to low levels of dioxins. *Chemosphere*, 73, S303-310. doi:10.1016/j.chemosphere.2007.12.032
- Ábalos M, Parera J, Estevez A, Sole M, Fabregat MC, Pina B, Navarro A and Abad E, 2011. Decontamination trends in the aquacultured fish gilthead seabream (*Sparus aurata*) after feeding long-term a PCDD/F spiked feed. *Chemosphere*, 82, 64-71. doi:10.1016/j.chemosphere.2010.10.008
- Abbott JD, Hinton SW and Borton DL, 1995. Pilot-scale validation of the river-fish bioaccumulation modeling program for nonpolar hydrophobic organic-compounds using the model compounds 2,3,7,8-TCDD and 2,3,7,8-TCDF. *Environmental Toxicology and Chemistry*, 14, 1999-2012. doi:10.1897/1552-8618(1995)14[1999:psvotf]2.0.co;2
- Åberg A, McLeod M and Wiberg K, 2015. Performance of the CalTOX fate and exposure model in a case study for a dioxin-contaminated site. *Environmental Science and Pollution Research*, 22, 8719-8727.
- Adeogun AO, Ibor OR, Adeduntan SD and Arukwe A, 2016. Intersex and alterations in reproductive development of a cichlid, *Tilapia guineensis*, from a municipal domestic water supply lake (Eleyele) in Southwestern Nigeria. *Science of the Total Environment*, 541, 372-382. doi:10.1016/j.scitotenv.2015.09.061
- Adolphs J, Kleinjung F, Numata J, Mielke H, Abraham K, Schafft H, Muller-Graf C and Greiner M, 2013. A probabilistic model for the carry-over of PCDD/Fs from feed to growing pigs. *Chemosphere*, 93, 474-479. doi:10.1016/j.chemosphere.2013.06.015
- AFRC (Agricultural and Food Research Council), 1993. Energy and protein requirements of ruminants. An advisory manual prepared by the AFRC Technical Committee on Responses to Nutrients. CAB International.
- AFSSA (Agence française de sécurité sanitaire des aliments), 2009. Étude Individuelle Nationale des Consommations Alimentaires 2 (INCA 2) 2006–2007. Available online: <http://www.anses.fr/Documents/PASER-Ra-INCA2.pdf>
- Ait-Aissa S, Ausseil O, Palluel O, Vindimian E, Garnier-Laplace J and Porcher JM, 2003. Biomarker responses in juvenile rainbow trout (*Oncorhynchus mykiss*) after single and combined exposure to low doses of cadmium, zinc, PCB77 and 17beta-oestradiol. *Biomarkers*, 8, 491-508. doi:10.1080/13547500310001640037
- Akerman G, Tjarnlund U, Noaksson E and Balk L, 1998. Studies with oxythiamine to mimic reproduction disorders among fish early life stages. *Marine Environmental Research*, 46, 493-497. doi:10.1016/s0141-1136(97)00098-6
- Akhtar FZ, Garabrant DH, Ketchum NS and Michalek JE, 2004. Cancer in US Air Force veterans of the Vietnam War. *J Occup Environ Med*, 46, 123-136. doi:10.1097/01.jom.0000111603.84316.0f
- Alaluusua S, Kiviranta H, Leppaniemi A, Holttä P, Lukinmaa PL, Lope L, Jarvenpää AL, Renlund M, Toppari J, Virtanen H, Kaleva M and Vartiainen T, 2002. Natal and neonatal teeth in relation to environmental toxicants. *Pediatr Res*, 52, 652-655. doi:10.1203/00006450-200211000-00008
- Alaluusua S, Calderara P, Gerthoux PM, Lukinmaa PL, Kovero O, Needham L, Patterson DG, Tuomisto J and Mocarelli P, 2004. Developmental dental aberrations after the dioxin accident in Seveso. *Environmental Health Perspectives*, 112, 1313-1318.
- Allan IJ, Baek K, Haugen TO, Hawley KL, Hogfeldt AS and Lillicrap AD, 2013. *In vivo* passive sampling of nonpolar contaminants in brown trout (*Salmo trutta*). *Environmental Science and Technology*, 47, 11660-11667. doi:10.1021/es401810r

- Allred PM and Strange JR, 1977. The effects of 2,4,5-trichlorophenoxyacetic acid and 2,3,7,8-tetrachlorodibenzo-*p*-dioxin on developing chicken embryos. *Arch Environ Contam Toxicol*, 6, 483-489.
- Alonso KR, Peden-Adams MM, Liu JY, Charbonneau C, Henshel D and Dickerson RL, 1998. Effects of *in ovo* exposure to 2,3,7,8-TCDD on F1 generation adult chickens (*Gallus gallus*). *Chemosphere*, 37, 1873-1883.
- Antunes P, Gil O, Ferreira M, Vale C and Reis-Henriques MA, 2007. Depuration of PCBs and DDTs in mullet under captivity clean conditions. *Chemosphere*, 67, S58-S64. doi:10.1016/j.chemosphere.2006.05.091
- Antunes P, Hendriks AJ, Huijbregts MA, Gil O and Reis-Henriques MA, 2008. Organ-specific accumulation and elimination patterns of PCBs in adult seabass (*Dicentrarchus labrax*). *Sci Total Environ*, 407, 204-210. doi:10.1016/j.scitotenv.2008.09.005
- Aragon AC, Kopf PG, Campen MJ, Huwe JK and Walker MK, 2008. In utero and lactational 2,3,7,8-tetrachlorodibenzo-*p*-dioxin exposure: Effects on fetal and adult cardiac gene expression and adult cardiac and renal morphology. *Toxicological Sciences*, 101, 321-330.
- Arellano JM, Ortiz JB, de Canales M and Sarasquete C, 2001. Histopathological alterations and induction of cytochrome P-450 1A in the liver and gills of the gilthead seabream (*Sparus aurata*) exposed to 2,3,7,8-tetrachlorodibenzo-*p*-dioxin. *Histochemical Journal*, 33, 663-674. doi:10.1023/a:1016358518743
- Arima A, Kato H, Ooshima Y, Tateishi T, Inoue A, Muneoka A, Ihara T, Kamimura S, Fukusato T, Kubota S, Sumida H and Yasuda M, 2009. *In utero* and lactational exposure to 2,3,7,8-tetrachlorodibenzo-*p*-dioxin (TCDD) induces a reduction in epididymal and ejaculated sperm number in rhesus monkeys. *Reproductive Toxicology*, 28, 495-502.
- Arima A, Kato H, Ise R, Ooshima Y, Inoue A, Muneoka A, Kamimura S, Fukusato T, Kubota S, Sumida H and Yasuda M, 2010. In utero and lactational exposure to 2,3,7,8-tetrachlorodibenzo-*p*-dioxin (TCDD) induces disruption of glands of the prostate and fibrosis in rhesus monkeys. *Reproductive Toxicology*, 29, 317-322.
- Arukwe A, Yadetie F, Male R and Goksoyr A, 2001. *In vivo* modulation of nonylphenol-induced zonagenesis and vitellogenesis by the antiestrogen, 3,3',4,4'-tetrachlorobiphenyl (PCB-77) in juvenile fish. *Environmental Toxicology and Pharmacology*, 10, 5-15. doi:10.1016/s1382-6689(01)00063-1
- Arukwe A, Olufsen M, Cicero N and Hansen MD, 2014. Effects on development, growth responses and thyroid-hormone systems in eyed-eggs and yolk-sac larvae of Atlantic salmon (*Salmo salar*) continuously exposed to 3,3',4,4'-tetrachlorobiphenyl (PCB-77). *J Toxicol Environ Health A*, 77, 574-586. doi:10.1080/15287394.2014.887422
- Asplund L, Athanasiadou M, Sjodin A, Bergman A and Borjeson H, 1999. Organohalogen substances in muscle, egg and blood from healthy Baltic salmon (*Salmo salar*) and Baltic salmon that produced offspring with the M74 syndrome. *Ambio*, 28, 67-76.
- ATSDR (Agency for Toxic Substances and Disease Registry), 1998. Toxicological profile for chlorinated dibenzo-*p*-dioxins. U.S. Department of Health and Human Services. Public Health Service. Available at: <http://www.atsdr.cdc.gov/toxprofiles/tp.asp?id=366&tid=63>
- Aulerich RJ, Bursian SJ, Breslin WJ, Olson BA and Ringer RK, 1985. Toxicological manifestations of 2,4,5,-2',4',5'-, 2,3,6,2',3',6'-, and 3,4,5,3',4',5'-hexachlorobiphenyl and Aroclor 1254 in mink. *Journal of Toxicology and Environmental Health*, 15, 63-79, doi: 10.1080/15287398509530636
- Aulerich RJ, Bursian SJ, Evans MG, Hochstein JR, Koudele KA, Olson BA and Napolitano AC, 1987. Toxicity of 3,4,5,3',4',5'-Hexachlorobiphenyl to mink. *Archives of Environmental Contamination and Toxicology*, 16, 53-60.
- Aulerich RJ, Bursian SJ and Napolitano AC, 1988. Biological Effects of Epidermal Growth Factor and 2,3,7,8-tetrachlorodibenzo-*p*-dioxin on developmental parameters of neonatal mink. *Archives of Environmental Contamination and Toxicology*, 17, 27-31.

- Ax RL and Hansen LG, 1975. Effects of purified polychlorinated biphenyl analogs on chicken reproduction. *Poultry Science*, 54, 895-900.
- Azza MM, Hegab AO, Yousef JM and MEA EHa, 2014. Toxicological Impact of Exposure to 2,3,7,8-tetrachlorodibenzo-*p*-dioxin (TCDD) on Some Hormonal Profiles and Hematological Parameters in Goats. *Annual Research & Review in Biology*, 4, 1278-1289. doi: 10.9734/ARRB/2014/6614
- Baccarelli A, Mocarelli P, Patterson DG, Bonzini M, Pesatori AC, Caporaso N and Landi MT, 2002. Immunologic effects of dioxin: New results from Seveso and comparison with other studies. *Environmental Health Perspectives*, 110, 1169-1173. doi: 10.1289/ehp.021101169
- Baccarelli A, Pesatori AC, Masten SA, Patterson DG, Needham LL, Mocarelli P, Caporaso NE, Consonni D, Grassman JA, Bertazzi PA and Landi MT, 2004. Aryl-hydrocarbon receptor-dependent pathway and toxic effects of TCDD in humans: a population-based study in Seveso, Italy. *Toxicology Letters*, 149, 287-293. doi:10.1016/j.toxlet.2003.12.062
- Baccarelli A, Pesatori AC, Consonni D, Mocarelli P, Patterson DG, Caporaso NE, Bertazzi PA and Landi MT, 2005. Health status and plasma dioxin levels in chloracne cases 20 years after the Seveso, Italy accident. *British Journal of Dermatology*, 152, 459-465. doi:10.1111/J.1365-2133.2005.06444.X
- Baccarelli A, Giacomini SM, Corbetta C, Landi MT, Bonzini M, Consonni D, Grillo P, Patterson DG, Pesatori AC and Bertazzi PA, 2008. Neonatal thyroid function in seveso 25 years after maternal exposure to dioxin. *Plos Medicine*, 5, 1133-1142. doi:10.1371/journal.pmed.0050161
- Barber MC, Suarez LA and Lassiter RR, 1991. Modeling bioaccumulation of organic pollutants in fish with an application to PCBs in lake-ontario salmonids. *Canadian Journal of Fisheries and Aquatic Sciences*, 48, 318-337. doi:10.1139/f91-044
- Bargar TA, Scott GI and Cobb GP, 2001a. Maternal transfer of contaminants: case study of the excretion of three polychlorinated biphenyl congeners and technical-grade endosulfan into eggs by white Leghorn chickens (*Gallus domesticus*). *Environ Toxicol Chem*, 20, 61-67.
- Bargar TA, Scott GI and Cobb GP, 2001b. Uptake and distribution of three PCB congeners and endosulfan by developing white leghorn chicken embryos (*Gallus domesticus*). *Arch Environ Contam Toxicol*, 41, 508-514. doi:10.1007/s002440010278
- Barrett DH, Morris RD, Akhtar FZ and Michalek JE, 2001. Serum Dioxin and Cognitive Functioning among Veterans of Operation Ranch Hand. *Neurotoxicology*, 22, 491-502. doi:https://doi.org/10.1016/S0161-813X(01)00051-1
- Becher H, Steindorf K and Flesch-Janys D, 1998. Quantitative cancer risk assessment for dioxins using an occupational cohort. *Environmental Health Perspectives*, 106, 663-670.
- Beck V, Roelens SA and Darras VM, 2006. Exposure to PCB 77 induces tissue-dependent changes in iodothyronine deiodinase activity patterns in the embryonic chicken. *General and Comparative Endocrinology*, 148, 327-335. doi:10.1016/j.ygcen.2006.04.003
- Beckett KJ, Yamini B and Bursian SJ, 2008. The effects of 3,3',4,4',5-pentachlorobiphenyl (PCB 126) on mink (*Mustela vison*) reproduction and kit survivability and growth. *Archives of Environmental Contamination and Toxicology*, 54, 123-129.
- Bell JG, McGhee F, Dick JR and Tocher DR, 2005. Dioxin and dioxin-like polychlorinated biphenyls (PCBS) in Scottish farmed salmon (*Salmo salar*): effects of replacement of dietary marine fish oil vegetable oils. *Aquaculture*, 243, 305-314.
- Bell DR, Clode S, Fan MQ, Fernandes A, Foster PMD, Jiang T, Loizou G, MacNicoll A, Miller BG, Rose M, Tran L and White S, 2007a. Toxicity of 2,3,7,8-tetrachlorodibenzo-*p*-dioxin in the developing male Wistar(Han) rat. I: No decrease in epididymal sperm count after a single acute dose. *Toxicological Sciences*, 99, 214-223. doi:10.1093/toxsci/kfm140
- Bell DR, Clode S, Fan MQ, Fernandes A, Foster PMD, Jiang T, Loizou G, MacNicoll A, Miller BG, Rose M, Tran L and White S, 2007b. Toxicity of 2,3,7,8-tetrachlorodibenzo-*p*-dioxin in the developing male Wistar(Han) rat. II: Chronic dosing causes developmental delay. *Toxicological Sciences*, 99, 224-233. doi:10.1093/toxsci/kfm141



- Bell DR, Clode S, Fan MQ, Fernandes A, Foster PMD, Jiang T, Loizou G, MacNicoll A, Miller BG, Rose M, Tran L and White S, 2007c. Relationships between tissue levels of 2,3,7,8-tetrachlorodibenzo-*p*-dioxin (TCDD), mRNAs, and toxicity in the developing male Wistar(Han) rat. *Toxicological Sciences*, 99, 591-604. doi:10.1093/toxsci/kfm179
- Bell JG, Dick JR, Strachan F, Guy DR, Berntssen MHG and Sprague M, 2012. Complete replacement of fish oil with a blend of vegetable oils affects dioxin, dioxin-like polychlorinated biphenyls (PCBs) and polybrominated diphenyl ethers (PBDEs) in 3 Atlantic salmon (*Salmo salar*) families differing in flesh adiposity. *Aquaculture*, 324, 118-126. doi:10.1016/j.aquaculture.2011.11.004
- Bellehumeur K, Lapointe D, Cooke SJ and Moon TW, 2016. Exposure to sublethal levels of PCB-126 impacts fuel metabolism and swimming performance in rainbow trout. *Comp Biochem Physiol B Biochem Mol Biol*. doi:10.1016/j.cbpb.2016.01.005
- Belpaeme K, Delbeke K, Zhu L and KirschVolders M, 1996. Cytogenetic studies of PCB77 on brown trout (*Salmo trutta fario*) using the micronucleus test and the alkaline comet assay. *Mutagenesis*, 11, 485-492. doi:10.1093/mutage/11.5.485
- Berg V, Lyche JL, Gutleb AC, Lie E, Skaare JU, Aleksandersen M and Ropstad E, 2010. Distribution of PCB 118 and PCB 153 and hydroxylated PCB metabolites (OH-CBs) in maternal, fetal and lamb tissues of sheep exposed during gestation and lactation. *Chemosphere*, 80, 1144-1150. doi:10.1016/j.chemosphere.2010.06.022
- Berge JA, Hylland K, Schlabach M and Ruus A, 2011. Accumulation of Polychlorinated Dibenzo-*p*-Dioxins and Furans in Atlantic Cod (*Gadus morhua*) Cage Experiments in a Norwegian Fjord. *Journal of Toxicology and Environmental Health-Part a-Current Issues*, 74, 455-465. doi:10.1080/15287394.2011.550556
- Bernard A, Broeckaert F, De Poorter G, De Cock A, Hermans C, Saegerman C and Houins G, 2002. The Belgian PCB/dioxin incident: Analysis of the food chain contamination and health risk evaluation. *Environmental Research*, 88, 1-18. doi:10.1006/enrs.2001.4274
- Bernhoft A, hektoen H, Skaare JU and Ingebrigtsen K, 1994. Tissue distribution and effects on hepatic xenobiotic-metabolizing enzymes of 2,3,3',4,4'-pentachlorobiphenyl (PCB-105) in cod (*Gadus morhua*) and rainbow-trout (*Oncorhynchus-mykiss*). *Environmental Pollution*, 85, 351-359.
- Berntssen MH, Giskegjerde TA, Rosenlund G, Torstensen BE and Lundebye AK, 2007. Predicting World Health Organization toxic equivalency factor dioxin and dioxin-like polychlorinated biphenyl levels in farmed Atlantic salmon (*Salmo salar*) based on known levels in feed. *Environ Toxicol Chem*, 26, 13-23.
- Berntssen MHG, Julshamn K and Lundebye A-K, 2010a. Chemical contaminants in aquafeeds and Atlantic salmon (*Salmo salar*) following the use of traditional- versus alternative feed ingredients. *Chemosphere*, 78, 637-646. doi:10.1016/j.chemosphere.2009.12.021
- Berntssen MH, Olsvik PA, Torstensen BE, Julshamn K, Midtun T, Goksoyr A, Johansen J, Sigholt T, Joerum N, Jakobsen JV, Lundebye AK and Lock EJ, 2010b. Reducing persistent organic pollutants while maintaining long chain omega-3 fatty acid in farmed Atlantic salmon using decontaminated fish oils for an entire production cycle. *Chemosphere*, 81, 242-252. doi:10.1016/j.chemosphere.2010.06.031
- Berntssen MH, Maage A, Julshamn K, Oeye BE and Lundebye AK, 2011. Carry-over of dietary organochlorine pesticides, PCDD/Fs, PCBs, and brominated flame retardants to Atlantic salmon (*Salmo salar* L.) fillets. *Chemosphere*, 83, 95-103. doi:10.1016/j.chemosphere.2011.01.017
- Berntssen MHG, Sanden M, Hove H and Lie O, 2016. Modelling scenarios on feed-to-fillet transfer of dioxins and dioxin-like PCBs in future feeds to farmed Atlantic salmon (*Salmo salar*). *Chemosphere*, 163, 413-421.
- Bertazzi PA, Consonni D, Bachetti S, Rubagotti M, Baccarelli A, Zocchetti C and Pesatori AC, 2001. Health effects of dioxin exposure: A 20-year mortality study. *American Journal of Epidemiology*, 153, 1031-1044. doi:10.1093/aje/153.11.1031

- Bervoets L, Van Campenhout K, Reynders H, Knapen D, Covaci A and Blust R, 2009. Bioaccumulation of micropollutants and biomarker responses in caged carp (*Cyprinus carpio*). *Ecotoxicol Environ Saf*, 72, 720-728. doi:10.1016/j.ecoenv.2008.10.008
- Bhavsar SP, Gewurtz SB, Helm PA, Labencki TL, Marvin CH, Fletcher R, Hayton A, Reiner EJ and Boyd D, 2010. Estimating Sediment Quality Thresholds To Prevent Restrictions on Fish Consumption: Application to Polychlorinated Biphenyls and Dioxins-Furans in the Canadian Great Lakes. *Integr Environ Assess Manag*, 6, 641-652. doi:10.1002/ieam.102
- Blanco SL, Sobrado C, Quintela C, Cabaleiro S, Gonzalez JC and Vieites JM, 2007. Dietary uptake of dioxins (PCDD/PCDFs) and dioxin-like PCBs in Spanish aquacultured turbot (*Psetta maxima*). *Food Addit Contam*, 24, 421-428. doi:10.1080/02652030601064821
- Blankenship AL, Hilscherova K, Nie M, Coady KK, Villalobos SA, Kannan K, Powell DC, Bursian SJ and Giesy JP, 2003. Mechanisms of TCDD-induced abnormalities and embryo lethality in white leghorn chickens. *Comparative Biochemistry and Physiology C-Toxicology & Pharmacology*, 136, 47-62. doi:10.1016/s1532-0456(03)00166-2
- Bloom M, Vena J, Olson J and Moysich K, 2006. Chronic exposure to dioxin-like compounds and thyroid function among New York anglers. *Environmental Toxicology and Pharmacology*, 21, 260-267. doi:10.1016/j.etap.2005.09.001
- Boers D, Portengen L, Bueno-de-Mesquita HB, Heederik D and Vermeulen R, 2010. Cause-specific mortality of Dutch chlorophenoxy herbicide manufacturing workers. *Occup Environ Med*, 67, 24-31. doi:10.1136/oem.2008.044222
- Boers D, Portengen L, Turner WE, Bueno-de-Mesquita HB, Heederik D and Vermeulen R, 2012. Plasma dioxin levels and cause-specific mortality in an occupational cohort of workers exposed to chlorophenoxy herbicides, chlorophenols and contaminants. *Occup Environ Med*, 69, 113-118. doi:10.1136/oem.2010.060426
- Boily MH, Ndayibagira A and Spear PA, 2003a. Retinoids, LRAT and REH activities in eggs of Japanese quail following maternal and *in ovo* exposures to 3,3',4,4'-tetrachlorobiphenyl. *Ecotoxicology*, 12, 9-21. doi:10.1023/a:1022572425466
- Boily MH, Ndayibagira A and Spear PA, 2003b. Retinoid metabolism (LRAT, REH) in the yolk-sac membrane of Japanese quail eggs and effects of mono-ortho-PCBs. *Comparative Biochemistry and Physiology C-Toxicology & Pharmacology*, 134, 11-23. doi:10.1016/s1532-0456(02)00146-1
- Boverhof DR, Burgoon LD, Tashiro C, Chittim B, Harkema JR, Jump DB and Zacharewski TR, 2005. Temporal and dose-dependent hepatic gene expression patterns in mice provide new insights into TCDD-mediated hepatotoxicity. *Toxicological Sciences*, 85, 1048-1063.
- Boverhof DR, Burgoon LD, Tashiro C, Sharratt B, Chittim B, Harkema JR, Mendrick DL and Zacharewski TR, 2006. Comparative toxicogenomic analysis of the hepatotoxic effects of TCDD in Sprague Dawley rats and C57BL/6 mice. *Toxicological Sciences*, 94, 398-416. doi:10.1093/toxsci/kfl100
- Bowman RE, Schantz SL, Gross ML and Fergusson, SA, 1989a. Behavioural effects in monkeys exposed to 2,3,7,8-TCDD transmitted maternally during gestation and for four months of nursing. *Chemosphere*; 18, 235-242.
- Bowman RE, Schantz SL, Weerasinghe NCA, Gross ML and Barsotti DA, 1989b. Chronic dietary intake of 2,3,7,8-tetrachlorodibenzo-*p*-dioxin (TCDD) at 5 or 25 parts per trillion in the monkey: TCDD kinetics and dose-effect estimate of reproductive toxicity. *Chemosphere*; 18, 243-252
- Brambilla G, Dellatte E, Fochi I, Iacovella N, Miniero R and di Domenico A, 2007. Depletion of selected polychlorinated biphenyl, dibenzodioxin, and dibenzofuran congeners in farmed rainbow trout (*Oncorhynchus mykiss*): A hint for safer fish farming. *Chemosphere*, 66, 1019-1030. doi:10.1016/j.chemosphere.2006.07.033
- Brambilla G, Fochi I, De Filippis SP, Iacovella N and di Domenico A, 2009. Pentachlorophenol, polychlorodibenzodioxin and polychlorodibenzofuran in eggs from hens exposed to contaminated

- wood shavings. Food Addit Contam Part A Chem Anal Control Expo Risk Assess, 26, 258-264. doi:10.1080/02652030802322572
- Brambilla G, De Filippis SP, Iamiceli AL, Iacovella N, Abate V, Aronica V, Di Marco V and di Domenico A, 2011a. Bioaccumulation of dioxin-like substances and selected brominated flame retardant congeners in the fat and livers of black pigs farmed within the Nebrodi Regional Park of Sicily. J Food Prot, 74, 261-269. doi:10.4315/0362-028x.jfp-10-176
- Brambilla G, Abate V, De Filippis SP, Fulgenzi AR, Iamiceli AL, Mazzette A, Miniero R and Pulina G, 2011b. Polychlorodibenzodioxin and -furan (PCDD and PCDF) and Dioxin-like Polychlorobiphenyl (DL-PCB) Congener Levels in Milk of Grazing Sheep as Indicators of the Environmental Quality of Rural Areas. Journal of Agricultural and Food Chemistry, 59, 8513-8517. doi:10.1021/jf2010673
- Brambilla G, Abate V, Battacone G, De Filippis SP, Esposito M, Esposito V and Miniero R, 2016. Potential impact on food safety and food security from persistent organic pollutants in top soil improvers on Mediterranean pasture. Science of the Total Environment, 543, 581-590. doi:10.1016/j.scitotenv.2015.10.159
- Branson DR, Takahashi IT, Parker WM and Blau GE, 1985. Bioconcentration kinetics of 2,3,7,8-tetrachlorodibenzo-para-dioxin in rainbow-trout. Environmental Toxicology and Chemistry, 4, 779-788. doi:10.1897/1552-8618(1985)4[779:bkotir]2.0.co;2
- Brinkmann M, Eichbaum K, Reininghaus M, Koglin S, Kammann U, Baumann L, Segner H, Zennegg M, Buchinger S, Reifferscheid G and Hollert H, 2015. Towards science-based sediment quality standards-Effects of field-collected sediments in rainbow trout (*Oncorhynchus mykiss*). Aquatic Toxicology, 166, 50-62. doi:10.1016/j.aquatox.2015.07.010
- Brix AE, Jokinen MP, Walker NJ, Sells DM and Nyska A, 2004. Characterization of bronchiolar metaplasia of the alveolar epithelium in female Sprague-Dawley rats exposed to 3,3',4,4',5-pentachlorobiphenyl (PCB126). Toxicologic Pathology, 32, 333-337.
- Brown SB, Delorme PD, Evans RE, Lockhart WL, Muir DCG and Ward FJ, 1998. Biochemical and histological responses in rainbow trout (*Oncorhynchus mykiss*) exposed to 2,3,4,7,8-pentachlorodibenzofuran. Environmental Toxicology and Chemistry, 17, 915-921. doi:10.1002/etc.5620170521
- Brown SB, Fisk AT, Brown M, Villella M, Muir DCG, Evans RE, Lockhart WL, Metner DA and Cooley HM, 2002. Dietary accumulation and biochemical responses of juvenile rainbow trout (*Oncorhynchus mykiss*) to 3,3',4,4',5-pentachlorobiphenyl (PCB 126). Aquatic Toxicology, 59, 139-152. doi:10.1016/s0166-445x(01)00246-6
- Browne EM, Juniper DT, Bryant MJ, Beever DE and Fisher AV, 2004. Intake, live-weight gain and carcass characteristics of beef cattle given diets based on forage maize silage harvested at different stages of maturity. Animal Science, 79, 405-413.
- Bruggeman V, Swennen Q, De Ketelaere B, Onagbesan O, Tona K and Decuypere E, 2003. Embryonic exposure to 2,3,7,8-tetrachlorodibenzo-*p*-dioxin in chickens: effects of dose and embryonic stage on hatchability and growth. Comparative Biochemistry and Physiology C-Toxicology & Pharmacology, 136, 17-28. doi:10.1016/s1532-0456(03)00168-6
- Bruggeman B, Onagbesan O, Dumez L, De Ketelaere B and Decuypere E, 2005. Effects of early prenatal exposure to 2,3,7,8-tetrachlorodibenzo-*p*-dioxin (TCDD) on postnatal reproduction in the laying hen (*Gallus gallus*). Comparative Biochemistry and Physiology C-Toxicology & Pharmacology, 141, 349-355. doi:10.1016/j.cbpc.2005.07.011
- Bruggeman V, van den Bergh G, Clerens S, Dumez L, Onagbesan O, Arckens L and decuypere E, 2006. Effect of a single *in ovo* injection of 2,3,7,8-tetrachlorodibenzo-*p*-dioxin on protein expression in liver and ovary of the one-day-old chick analyzed by fluorescent two-dimensional difference gel electrophoresis and mass spectrometry. Proteomics, 6, 2576-2585.
- Brunström B, 1988. Sensitivity of embryos from duck, goose, herring gull, and various chicken breeds to 3,3',4,4'-tetrachlorobiphenyl. Poult Sci, 67, 52-57. doi:10.3382/ps.0670052



- Brunström B, 1989. Toxicity of coplanar polychlorinated-biphenyls in avian embryos. *Chemosphere*, 19, 765-768. doi:10.1016/0045-6535(89)90405-0
- Brunström B, 1992. Embryo lethality and induction of 7-ethoxyresorufin O-deethylase in chick embryos by polychlorinated biphenyls and polycyclic aromatic hydrocarbons having Ah receptor affinity. *Chem Biol Interact*, 81, 69-77.
- Brunström B and Reutergårdh L, 1986. Differences in sensitivity of some avian species to the embryotoxicity of a PCB, 3,3',4,4'-tetrachlorobiphenyl, injected into the eggs. *Environmental Pollution Series a-Ecological and Biological*, 42, 37-45. doi:10.1016/0143-1471(86)90043-7
- Brunström B and Lund J, 1988. Differences between chick and turkey embryos in sensitivity to 3,3',4,4'-tetrachloro-biphenyl and in concentration/affinity of the hepatic receptor for 2,3,7,8-tetrachlorodibenzo-*p*-dioxin. *Comp Biochem Physiol C*, 91, 507-512.
- Buckler J, Candrl JS, McKee MJ, Papoulias DM, Tillitt DE and Galat DL, 2015. Sensitivity of shovelnose sturgeon (*Scaphirhynchus platyrhynchus*) and pallid sturgeon (*S. albus*) early life stages to 3,3',4,4',5-pentachlorobiphenyl and 2,3,7,8-tetrachlorodibenzo-*p*-dioxin exposure. *Environ Toxicol Chem*, 34, 1417-1424. doi:10.1002/etc.2950
- Buckman AH, Brown SB, Hoekstra PF, Solomon KR and Fisk AT, 2004. Toxicokinetics of three polychlorinated biphenyl technical mixtures in rainbow trout (*Oncorhynchus mykiss*). *Environmental Toxicology and Chemistry*, 23, 1725-1736,
- Buckman AH, Wong CS, Chow EA, Brown SB, Solomon KR and Fisk AT, 2006. Biotransformation of polychlorinated biphenyls (PCBs) and bioformation of hydroxylated PCBs in fish. *Aquat Toxicol*, 78, 176-185. doi:10.1016/j.aquatox.2006.02.033
- Buckman AH, Brown SB, Small J, Muir DC, Parrott J, Solomon KR and Fisk AT, 2007a. Role of temperature and enzyme induction in the biotransformation of polychlorinated biphenyls and bioformation of hydroxylated polychlorinated biphenyls by rainbow trout (*Oncorhynchus mykiss*). *Environ Sci Technol*, 41, 3856-3863.
- Buckman AH, Fisk AT, Parrott JL, Solomon KR and Brown SB, 2007b. PCBs can diminish the influence of temperature on thyroid indices in rainbow trout (*Oncorhynchus mykiss*). *Aquat Toxicol*, 84, 366-378. doi:10.1016/j.aquatox.2007.06.016
- Burkhard LP, Cook PM and Lukasewycz MT, 2004. Biota-sediment accumulation factors for polychlorinated biphenyls, dibenzo-*p*-dioxins, and dibenzofurans in southern Lake Michigan lake trout (*Salvelinus namaycush*). *Environ Sci Technol*, 38, 5297-5305.
- Burkhard LP, Cook PM and Lukasewycz MT, 2006. A hybrid empirical-mechanistic modeling approach for extrapolating biota-sediment accumulation factors and bioaccumulation factors across species, time, and/or ecosystems. *Environ Toxicol Chem*, 25, 1946-1952.
- Burns JS, Williams PL, Sergeev O, Korrick S, Lee MM, Revich B, Altshul L, Del Prato JT, Humblet O, Patterson DG, Turner WE, Needham LL, Starovoytov M and Hauser R, 2011. Serum Dioxins and Polychlorinated Biphenyls Are Associated With Growth Among Russian Boys. *Pediatrics*, 127, 59-68. doi:10.1542/peds.2009-3556
- Burns JS, Lee MM, Williams PL, Korrick SA, Sergeev O, Lam T, Revich B and Hauser R, 2016. Associations of Peripubertal Serum Dioxin and Polychlorinated Biphenyl Concentrations with Pubertal Timing among Russian Boys. *Environmental Health Perspectives*, 124, 1801-1807. doi:10.1289/ehp154
- Burreau S, Axelman J, Broman D and Jakobsson E, 1997. Dietary uptake in pike (*Esox lucius*) of some polychlorinated biphenyls, polychlorinated naphthalenes and polybrominated diphenyl ethers administered in natural diet. *Environmental Toxicology and Chemistry*, 16, 2508-2513. doi:10.1897/1551-5028(1997)016<2508:duipel>2.3.co;2
- Burroni C, Mariottini M, Della Torre C, Corsi I, Caruso T, Sensini C, Perra G, Volpi V, Zucchi S and Focardi S, 2009. Persistent organic pollutants and enzyme activities in European eel (*Anguilla anguilla*) from Orbetello lagoon. *Transitional Waters Bulletin*, 3, 14-28

- Bursian SJ, Sharma C, Aulerich RJ, Yamini B, Mitchell RR, Orazio CE, Moore DRJ, Svirsky S and Tillitt DE, 2006a. Dietary exposure of mink (*Mustela vison*) to fish from the Housatonic River, Berkshire County, Massachusetts, USA: Effects on reproduction, kit growth, and survival. *Environmental Toxicology and Chemistry*, 25, 1533-1540.
- Bursian SJ, Sharma C, Aulerich RJ, Yamini B, Mitchell RR, Beckett KJ, Orazio CE, Moore D, Svirsky S and Tillitt DE, 2006b. Dietary exposure of mink (*Mustela vison*) to fish from the Housatonic River, Berkshire County, Massachusetts, USA: Effects on organ weights and histology and hepatic concentrations of polychlorinated biphenyls and 2,3,7,8-tetrachlorodibenzo-*p*-dioxin toxic equivalence. *Environmental Toxicology and Chemistry*, 25, 1541-1550.
- Bursian SJ, Beckett KJ, Yamini B, Martin PA, Kannan K, Shields KL and Mohr FC, 2006c. Assessment of effects in mink caused by consumption of carp collected from the Saginaw River, Michigan, USA. *Archives of Environmental Contamination and Toxicology*, 50, 614-623.
- Bursian SJ, Moore J, Newsted JL, Link JE, Fitzgerald SD, Bello N, Bhat VS, Kay D, Zhang XW, Wiseman S, Budinsky RA, Giesy JP and Zwiernik MJ, 2012. Incidence of jaw lesions and activity and gene expression of hepatic P4501A enzymes in mink (*Mustela vison*) exposed to dietary 2,3,7,8-tetrachlorodibenzo-*p*-dioxin, 2,3,7,8-tetrachlorodibenzofuran, and 2,3,4,7,8-pentachlorodibenzofuran. *Environmental Toxicology and Chemistry*, 31, 2545-2556.
- Bursian SJ, Kern J, Remington RE, Link JE and Fitzgerald SD, 2013a. Dietary exposure of mink (*Mustela vison*) to fish from the upper Hudson River, New York, USA: Effects on reproduction and offspring growth and mortality. *Environmental Toxicology and Chemistry*, 32, 780-793.
- Bursian SJ, Kern J, Remington RE, Link JE and Fitzgerald SD, 2013b. Dietary exposure of mink (*Mustela vison*) to fish from the upper Hudson River, New York, USA: Effects on organ mass and pathology. *Environmental Toxicology and Chemistry*, 32, 794-801.
- Bussolaro D, Filipak Neto F, Glinski A, Roche H, Guiloski IC, Mela M, Silva de Assis HC and Oliveira Ribeiro CA, 2012. Bioaccumulation and related effects of PCBs and organochlorinated pesticides in freshwater fish *Hypostomus commersoni*. *Journal of Environmental Monitoring*, 14, 2154-2163. doi:10.1039/c2em10863a
- Bytingsvik J, Frantzen M, Gotsch A, Heimstad ES, Christensen G and Evenset A, 2015. Current status, between-year comparisons and maternal transfer of organohalogenated compounds (OHCs) in Arctic char (*Salvelinus alpinus*) from Bjornoya, Svalbard (Norway). *Science of the Total Environment*, 521, 421-430. doi:10.1016/j.scitotenv.2015.03.104
- Cai LY, Izumi S, Suzuki T, Goya K, Nakamura E, Sugiyama T and Kobayashi H, 2011. Dioxins in ascites and serum of women with endometriosis: a pilot study. *Human Reproduction*, 26, 117-126. doi:10.1093/humrep/deq312
- Calo M, Alberghina D, Bitto A, Lauriano ER and Lo Cascio P, 2010. Estrogenic followed by anti-estrogenic effects of PCBs exposure in juvenile fish (*Spaarus aurata*). *Food and Chemical Toxicology*, 48, 2458-2463. doi:10.1016/j.fct.2010.06.013
- Calvert GM, Wall DK, Sweeney MH and Fingerhut MA, 1998. Evaluation of cardiovascular outcomes among US workers exposed to 2,3,7,8-tetrachlorodibenzo-*p*-dioxin. *Environmental Health Perspectives*, 106, 635-643. doi:10.2307/3433814
- Calvert GM, Sweeney MH, Deddens J and Wall DK, 1999. Evaluation of diabetes mellitus, serum glucose, and thyroid function among United States workers exposed to 2,3,7,8-tetrachlorodibenzo-*p*-dioxin. *Occup Environ Med*, 56, 270-276.
- Canga L, Paroli L, Blanck TJJ, Silver RB and Rifkind AB, 1993. 2,3,7,8-Tetrachlorodibenzo-*P*-dioxin increases cardiac myocyte intracellular calcium and progressively impairs ventricular contractile responses to isoproterenol and to calcium in chick-embryo hearts. *Molecular Pharmacology*, 44, 1142-1151.
- Cannas M, Atzori F, Rupsard F, Bustamante P, Loizeau V and Lefrancois C, 2013. PCBs contamination does not alter aerobic metabolism and tolerance to hypoxia of juvenile sole (*Solea solea* L. 1758). *Aquat Toxicol*, 127, 54-60. doi:10.1016/j.aquatox.2012.04.017

- Cao Y, Winneke G, Wilhelm M, Wittsiepe J, Lemm F, Fürst P, Ranfte U, Imöhl M, Kraft M, Oesch-Bartlomowicz B, Krämer U, 2008. Environmental exposure to dioxins and polychlorinated biphenyls reduce levels of gonadal hormones in newborns: Results from the Duisburg cohort study. *Int. J. Hyg. Environ. Health*, 211, 30–39.
- Cappelletti N, Speranza E, Tatone L, Astoviza M, Migoya MC and Colombo JC, 2015. Bioaccumulation of dioxin-like PCBs and PBDEs by detritus-feeding fish in the Rio de la Plata estuary, Argentina. *Environmental Science and Pollution Research*, 22, 7093-7100. doi:10.1007/s11356-014-3935-z
- Carabano R and Piquer J, 1998. The digestive system of the rabbit. In: de Blas C and Wiseman J (eds.). *The Nutrition of the Rabbit*, CABI Publishing, Oxfordshire. pp. 1–16.
- Carro T, Dean K and Ottinger MA, 2013. Effects of an environmentally relevant polychlorinated biphenyl (PCB) mixture on embryonic survival and cardiac development in the domestic chicken. *Environmental Toxicology and Chemistry*, 32, 1325-1331. doi:10.1002/etc.2178
- Carter CD, Kimbrough RD, Liddle JA, Cline RE, Zack MM, Barthel WF, Koehler RE and Phillips PE, 1975. Tetrachlorodibenzodioxin: an accidental poisoning episode in horse arenas. *Science*, 188(4189), 738-740.
- Carvalho PS and Tillitt DE, 2004. 2,3,7,8-TCDD effects on visual structure and function in swim-up rainbow trout. *Environ Sci Technol*, 38, 6300-6306.
- Carvalho PS, Noltie DB and Tillitt DE, 2004. Intra-strain dioxin sensitivity and morphometric effects in swim-up rainbow trout (*Oncorhynchus mykiss*). *Comp Biochem Physiol C Toxicol Pharmacol*, 137, 133-142. doi:10.1016/j.cca.2003.12.005
- Caspersen IH, Haugen M, Schjolberg S, Vejrup K, Knutsen HK, Brantster AL, Meltzer HM, Alexander J, Magnus P and Kvaalem HE, 2016a. Maternal dietary exposure to dioxins and polychlorinated biphenyls (PCBs) is associated with language delay in 3 year old Norwegian children. *Environment International*, 91, 180-187. doi:10.1016/j.envint.2016.02.031
- Caspersen IH, Aase H, Biele G, Brantsaeter AL, Haugen M, Kvaalem HE, Skogan AH, Zeiner P, Alexander J, Meltzer HM and Knutsen HK, 2016b. The influence of maternal dietary exposure to dioxins and PCBs during pregnancy on ADHD symptoms and cognitive functions in Norwegian preschool children. *Environment International*, 94, 649-660. doi:10.1016/j.envint.2016.06.033
- Catalan J, Ventura M, Vives I and Grimalt JO, 2004. The roles of food and water in the bioaccumulation of organochlorine compounds in high mountain lake fish. *Environmental Science and Technology*, 38, 4269-4275. doi:10.1021/es040035p
- Cavret S, Laurent C, Feidt C, Laurent F and Rychen G, 2003. Intestinal absorption of <sup>14</sup>C from <sup>14</sup>C-phenanthrene, <sup>14</sup>C-benzo[a]pyrene and <sup>14</sup>C-tetrachlorodibenzo-para-dioxin: approaches with the Caco-2 cell line and with portal absorption measurements in growing pigs. *Reprod Nutr Dev*, 43, 145-154.
- Chamberland G, Tremblay A, Lamothe P and Gignac M, 1994. Clinical-chemistry, growth and PCB levels in beef-cattle exposed to a PCB fire. *Toxicological and Environmental Chemistry*, 44, 177-187. doi:10.1080/02772249409358056
- Chang HJ, Wang S, Li HW, Lin KH, Chao CC and Lai YC, 2010. Polychlorinated dibenzo-*p*-dioxins and dibenzofuran contents in fish and sediment near a pentachlorophenol contaminated site. *Journal of Environmental Science and Health Part a-Toxic/Hazardous Substances & Environmental Engineering*, 45, 923-931. doi:10.1080/10934521003772303
- Chao HR, Wang SL, Lin LY, Lee WJ and Papke O, 2007. Placental transfer of polychlorinated dibenzo-*p*-dioxins, dibenzofurans, and biphenyls in Taiwanese mothers in relation to menstrual cycle characteristics. *Food and Chemical Toxicology*, 45, 259-265. doi:10.1016/j.fct.2006.07.032
- Chen JW, Wang SL, Liao PC, Chen HY, Ko YC and Lee CC, 2008. Relationship between insulin sensitivity and exposure to dioxins and polychlorinated biphenyls in pregnant women. *Environmental Research*, 107, 245-253. doi:10.1016/j.envres.2008.01.004

- Cheung MO, Gilbert EF and Peterson RE, 1981. Cardiovascular teratogenicity of 2,3,7,8-Tetrachlorodibenzo-para-dioxin in the chick-embryo. *Toxicology and Applied Pharmacology*, 61, 197-204. doi:10.1016/0041-008x(81)90409-9
- Cheng H, Aylward L, Beall C, Starr TB, Brunet RC, Carrier G and Delzell E, 2006. TCDD exposure-response analysis and risk assessment. *Risk Anal*, 26, 1059-1071. doi:10.1111/j.1539-6924.2006.00800.x
- Chevrier J, Warner M, Gunier RB, Brambilla P, Eskenazi B and Mocarelli P, 2014. Serum Dioxin Concentrations and Thyroid Hormone Levels in the Seveso Women's Health Study. *American Journal of Epidemiology*, 180, 490-498. doi:10.1093/aje/kwu160
- Chu I, Poon R, Yagminas A, Lecavalier P, Hakansson H, Valli VE, Kennedy SW, Bergman A, Seegal RF and Feeley M, 1998. Subchronic toxicity of PCB 105 (2,3,3',4,4'-entachlorobiphenyl) in rats. *Journal of Applied Toxicology*;18 (4): 285-292 JUL-AUG 1998, 18, 285-292.
- Cigliano L, Nebbia C, Rychen G, Feidt C, Girolami F, Rossetti C and Spagnuolo MS, 2016. Evaluation of serum markers of blood redox homeostasis and inflammation in PCB naturally contaminated heifers undergoing decontamination. *Science of the Total Environment*, 542, 653-664. doi:10.1016/j.scitotenv.2015.10.104
- Cohen-Barnhouse AM, Zwiernik MJ, Link JE, Fitzgerald SD, Kennedy SW, Giesy JP, Wiseman S, Jones PD, Newsted JL, Kay D and Bursian SJ, 2011a. Developmental and posthatch effects of *in ovo* exposure to 2,3,7,8-TCDD, 2,3,4,7,8-PECDF, and 2,3,7,8-TCDF in Japanese quail (*Coturnix japonica*), common pheasant (*Phasianus colchicus*), and white leghorn chicken (*Gallus gallus domesticus*) embryos. *Environ Toxicol Chem*, 30, 1659-1668. doi:10.1002/etc.551
- Cohen-Barnhouse AM, Zwiernik MJ, Link JE, Fitzgerald SD, Kennedy SW, Herve JC, Giesy JP, Wiseman S, Yang Y, Jones PD, Wan Y, Collins B, Newsted JL, Kay D and Bursian SJ, 2011b. Sensitivity of Japanese Quail (*Coturnix japonica*), Common Pheasant (*Phasianus colchicus*), and White Leghorn Chicken (*Gallus gallus domesticus*) Embryos to *In Ovo* Exposure to TCDD, PeCDF, and TCDF. *Toxicological Sciences*, 119, 93-103. doi:10.1093/toxsci/kfq289
- Cok I, Donmez MK, Satioglu MH, Aydinuraz B, Henkelmann B, Shen H, Kotalik J and Schramm KW, 2008. Concentrations of polychlorinated dibenzo-*p*-dioxins (PCDDs), polychlorinated dibenzofurans (PCDFs), and dioxin-like PCBs in adipose tissue of infertile men. *Arch Environ Contam Toxicol*, 55, 143-152. doi:10.1007/s00244-007-9094-1
- Collins JJ, Bodner K, Aylward LL, Wilken M and Bodnar CM, 2009a. Mortality rates among trichlorophenol workers with exposure to 2,3,7,8-tetrachlorodibenzo-*p*-dioxin. *Am J Epidemiol*, 170, 501-506. doi:10.1093/aje/kwp153
- Collins JJ, Bodner K, Aylward LL, Wilken M, Swaen G, Budinsky R, Rowlands C and Bodnar CM, 2009b. Mortality rates among workers exposed to dioxins in the manufacture of pentachlorophenol. *J Occup Environ Med*, 51, 1212-1219. doi:10.1097/JOM.0b013e3181badd4e
- Colombo JC, Cappelletti N, Migoya MC and Speranza E, 2007. Bioaccumulation of anthropogenic contaminants by detritivorous fish in the Rio de la Plata estuary: 2-Polychlorinated biphenyls. *Chemosphere*, 69, 1253-1260. doi:10.1016/j.chemosphere.2007.05.073
- Consonni D, Pesatori AC, Zocchetti C, Sindaco R, D'Oro LC, Rubagotti M and Bertazzi PA, 2008. Mortality in a population exposed to dioxin after the Seveso, Italy, accident in 1976 : 25 years of follow-up. *American Journal of Epidemiology*, 167, 847-858. doi:10.1093/aje/kwm371
- Cook PM, Robbins JA, Endicott DD, Lodge KB, Guiney PD, Walker MK, Zabel EW and Peterson RE, 2003. Effects of aryl hydrocarbon receptor-mediated early life stage toxicity on lake trout populations in Lake Ontario during the 20th century. *Environ Sci Technol*, 37, 3864-3877.
- Cristine S, Haffner GD, Ciborowski JJH, Lazar R, Nanni ME and Metcalfe CD, 1996. Elimination rates of selected di-ortho, mono-ortho, and non-ortho substituted polychlorinated biphenyls in rainbow trout (*Oncorhynchus mykiss*). *Environmental Toxicology and Chemistry*, 15, 1382-1387. doi:10.1897/1551-5028(1996)015<1382:erosdo>2.3.co;2

- Costera A, Feidt C, Marchand P, Le Bizec B and Rychen G, 2006. PCDD/F and PCB transfer to milk in goats exposed to a long-term intake of contaminated hay. *Chemosphere*, 64, 650-657. doi:10.1016/j.chemosphere.2005.10.052
- Couderc M, Marchand J, Zalouk-Vergnoux A, Kamari A, Moreau B, Blanchet-Letrouye I, Le Bizec B, Mouneyrac C and Poirier L, 2016. Thyroid endocrine status of wild European eels (*Anguilla anguilla*) in the Loire (France). Relationships with organic contaminant body burdens. *Science of the Total Environment*, 550, 391-405. doi:10.1016/j.scitotenv.2015.12.136
- Cranmer M, Louie S, Kennedy RH, Kern PA and Fonseca VA, 2000. Exposure to 2,3,7,8-tetrachlorodibenzo-*p*-dioxin (TCDD) is associated with hyperinsulinemia and insulin resistance. *Toxicol Sci*, 56, 431-436.
- Croes K, Den Hond E, Bruckers L, Loots I, Morrens B, Nelen V, Colles A, Schoeters G, Sioen I, Covaci A, Vandermarken T, Van Larebeke N and Baeyens W, 2014. Monitoring chlorinated persistent organic pollutants in adolescents in Flanders (Belgium): Concentrations, trends and dose-effect relationships (FLEHS II). *Environment International*, 71, 20-28. doi:10.1016/j.envint.2014.05.022
- Crofton KM, Craft ES, Hedge JM, Gennings C, Simmons JE, Carchman RA, Carter WH and DeVito MJ, 2005. Thyroid-hormone-disrupting chemicals: Evidence for dose-dependent additivity or synergism. *Environmental Health Perspectives*, 113, 1549-1554.
- Croutch CR, Lebofsky M, Schramm KW, Terranova PF and Rozman KK, 2005. 2,3,7,8-Tetrachlorodibenzo-*p*-dioxin (TCDD) and 1,2,3,4,7,8-hexachlorodibenzo-*p*-dioxin (HxCDD) alter body weight by decreasing insulin-like growth factor I (IGF-I) signaling. *Toxicological Sciences*, 85, 560-571.
- Cypel YS, Kress AM, Eber SM, Schneiderman AI and Davey VJ, 2016. Herbicide Exposure, Vietnam Service, and Hypertension Risk in Army Chemical Corps Veterans. *J Occup Environ Med*, 58, 1127-1136. doi:10.1097/jom.0000000000000876
- Daley JM, Leadley TA, Piycher TE and Drouillard KG, 2012. Bioamplification and the selective depletion of persistent organic pollutants in Chinook salmon larvae. *Environmental Science and Technology*, 46, 2420-2426. doi: 10.1021/es204003a
- Daley JM, Leadley TA, Pitcher TE and Drouillard KG, 2013. The effect of food provisioning on persistent organic pollutant bioamplification in Chinook salmon larvae. *Chemosphere*, 92, 10-15. doi:10.1016/j.chemosphere.2013.03.036
- Davies FG, de Souza C, Waghela S and Mohn S, 1985. Possible dioxin poisoning in cattle. *Vet Rec*, 117, 207. Doi:10.1136/vr.117.9.207
- De Boer J and Pieters H, 1991. Dietary accumulation of polychlorinated biphenyls chlorinated pesticides and mercury by cultivated eels *anguilla-anguilla* L. *Aquaculture and Fisheries Management*, 22, 329-334.
- De Felip E, Porpora MG, di Domenico A, Ingelido AM, Cardelli M, Cosmi EV and Donnez J, 2004. Dioxin-like compounds and endometriosis: a study on Italian and Belgian women of reproductive age. *Toxicology Letters*, 150, 203-209. doi:10.1016/j.toxlet.2004.01.008
- De Filippis SP, Chirollo C, Brambilla G, Anastasio A, Sarnelli P, De Felip E, di Domenico A, Iamiceli AL and Cortesi ML, 2013. Polychlorodibenzodioxin and -furan and dioxin-like polychlorobiphenyl distribution in tissues and dairy products of dairy buffaloes. *J Agric Food Chem*, 61, 6552-6561. doi:10.1021/jf401004c
- De Roode DF, Vuorinen PJ and Bosveld ATC, 2002a. Effects of furazolidone, PCB77, PCB126, Aroclor 1248, paraquat and p,p'-DDE on transketolase activity in embryonal chicken brain. *Toxicology*, 173, 203-210. doi:10.1016/s0300-483x(02)00009-4
- De Roode DE, Gustavsson MB, Rantalainen AL, Klomp AV, Koeman JH and Bosveld ATC, 2002b. Embryotoxic potential of persistent organic pollutants extracted from tissues of guillemots (*Uria aalge*) from the Baltic Sea and the Atlantic Ocean. *Environmental Toxicology and Chemistry*, 21, 2401-2411. doi:10.1897/1551-5028(2002)021<2401:epopop>2.0.co;2



- De Roos AJ, Hartge P, Lubin JH, Colt JS, Davis S, Cerhan JR, Severson RK, Cozen W, Patterson DG, Jr., Needham LL and Rothman N, 2005. Persistent organochlorine chemicals in plasma and risk of non-Hodgkin's lymphoma. *Cancer Res*, 65, 11214-11226. doi:10.1158/0008-5472.can-05-1755
- De Vos S, Maervoet J, Schepens P and De Schrijver R, 2003. Polychlorinated biphenyls in broiler diets: their digestibility and incorporation in body tissues. *Chemosphere*, 51, 7-11.
- De Vos S, Verschueren D and De Schrijver R, 2005. Digestibility, retention and incorporation of low-level dietary PCB contents in laying hens. *Chemosphere*, 58, 1553-1562. doi:10.1016/j.chemosphere.2004.11.081
- Dean CE, Benjamin SA, Chubb LS, Tessari JD and Keefe TJ, 2002. Nonadditive hepatic tumor promoting effects by a mixture of two structurally different polychlorinated biphenyls in female rat livers. *Toxicological Sciences*, 66, 54-61.
- Debruyn AMH, Ikonomou MG and Gobas F, 2004. Magnification and toxicity of PCBs, PCDDs, and PCDFs in upriver-migrating Pacific salmon. *Environmental Science & Technology*, 38, 6217-6224. doi:10.1021/es049607w
- DeKrey GK, Teagarden RE, Lenberg JL and Titus RG, 2013. 2,3,7,8-Tetrachlorodibenzo-*p*-dioxin Slows the Progression of Experimental Cutaneous Leishmaniasis in Susceptible BALB/c and SCID Mice. *PLOS ONE*;8 (10): - OCT 1 2013, 8.
- Delistraty D and Stone A, 2007. Dioxins, metals, and fish toxicity in ash residue from space heaters burning used motor oil. *Chemosphere*, 68, 907-914. doi:10.1016/j.chemosphere.2007.01.070
- Delvaux I, Van Cauwenberghe J, Den Hond E, Schoeters G, Govarts E, Nelen V, Baeyens W, Van Larebeke N and Sioen I, 2014. Prenatal exposure to environmental contaminants and body composition at age 7-9 years. *Environmental Research*, 132, 24-32. doi:10.1016/j.envres.2014.03.019
- Den Hond E, Roels HA, Hoppenbrouwers K, Nawrot T, Thijs L, Vandermeulen C, Winneke G, Vanderschueren D and Staessen JA, 2002. Sexual maturation in relation to polychlorinated aromatic hydrocarbons: Sharpe and Skakkebaek's hypothesis revisited. *Environmental Health Perspectives*, 110, 771-776.
- Den Hond E, Tournaye H, De Sutter P, Ombelet W, Baeyens W, Covaci A, Cox B, Nawrot TS, Van Larebeke N and D'Hooghe T, 2015. Human exposure to endocrine disrupting chemicals and fertility: A case-control study in male subfertility patients. *Environ Int*, 84, 154-160. doi:10.1016/j.envint.2015.07.017
- Desaulniers D, Leingartner K, Musicki B, Yagminas A, Xiao GH, Cole J, Marro L, Charbonneau M and Tsangt BK, 2003. Effects of postnatal exposure to mixtures of non-ortho-PCBs, PCDDs, and PCDFs in prepubertal female rats. *Toxicological Sciences*, 75, 468-480.
- Dhooge W, van Larebeke N, Koppen G, Nelen V, Schoeters G, Vlietinck R, Kaufman JM and Comhaire F, 2006. Serum dioxin-like activity is associated with reproductive parameters in young men from the general Flemish population. *Environmental Health Perspectives*, 114, 1670-1676. doi:10.1289/ehp.9224
- Di Paolo C, Gandhi N, Bhavsar SP, Van den Heuvel-Greve M and Koelmans AA, 2010. Black Carbon Inclusive Multichemical Modeling of PBDE and PCB Biomagnification and -Transformation in Estuarine Food Webs. *Environmental Science and Technology*, 44, 7548-7554. doi:10.1021/es101247e
- Dinse GE, Jusko TA, Whitt IZ, Co CA, Parks CG, Satoh M, Chan EKL, Rose KM, Walker NJ, Birnbaum LS, Zeldin DC, Weinberg CR and Miller FW, 2016. Associations Between Selected Xenobiotics and Antinuclear Antibodies in the National Health and Nutrition Examination Survey, 1999-2004. *Environmental Health Perspectives*, 124, 426-436. doi:10.1289/ehp.1409345
- Doi AM, Lou Z, Holmes E, Venugopal CS, Nyagode B, James MO and Kleinow KM, 2006. Intestinal bioavailability and biotransformation of 3,3',4,4'-tetrachlorobiphenyl (CB 77) in *in situ* preparations of channel catfish following dietary induction of CYP1A. *Aquatic Toxicology*, 77, 33-42.

- Drew MD, Ogunkoya AE, Janz DM and Van Kessel AG, 2007. Dietary influence of replacing fish meal and oil with canola protein concentrate and vegetable oils on growth performance, fatty acid composition and organochlorine residues in rainbow trout (*Oncorhynchus mykiss*). *Aquaculture*, 267, 260-268. doi:10.1016/j.aquaculture.2007.01.002
- EBLEX (Division of the Agriculture and Horticulture Development Board - AHDB), 2008. Feeding growing and finishing cattle for better return. EBLEX BEEF BPR Manual 7. Available online: <http://beefandlamb.ahdb.org.uk/about/>
- EBLEX (Division of the Agriculture and Horticulture Development Board - AHDB), 2012. Maize in beef system. Available online: <http://beefandlamb.ahdb.org.uk/about/>
- EFSA (European Food Safety Authority), 2006. Guidance of the Scientific Committee on a request from EFSA related to Uncertainties in Dietary Exposure Assessment. *EFSA Journal*, 4(12):438, 54 pp. doi:10.2903/j.efsa.2007.438
- EFSA (European Food Safety Authority), 2009a. Guidance of the Scientific Committee on use of the benchmark dose approach in risk assessment. *EFSA Journal* 2009;7(6):1150, 72 pp. doi:10.2903/j.efsa.2009.1150
- EFSA (European Food Safety Authority), 2009b. Guidance of the Scientific Committee on transparency in the scientific aspects of risk assessments carried out by EFSA. Part 2: General principles. *EFSA Journal* 2009;7(6):1051, 22 pp. doi:10.2903/j.efsa.2009.1151
- EFSA (European Food Safety Authority), 2009c. Guidance for the preparation of dossiers for sensory additives. *EFSA Journal*;7(10):1352, 26 pp. doi:10.2903/j.efsa.2009.1352
- EFSA (European Food Safety Authority), 2010a. Management of left-censored data in dietary exposure assessment of chemical substances. *EFSA Journal* 2010;8(3):1557, 96 pp. doi:10.2903/j.efsa.2010.1557
- EFSA (European Food Safety Authority), 2010b. Application of systematic review methodology to food and feed safety assessments to support decision making. *EFSA Journal* 2010;8(6):1637. 90 pp. doi:10.2903/j.efsa.2010.1637
- EFSA (European Food Safety Authority), 2010c. Standard sample description for food and feed. *EFSA Journal* 2010;8(1):1457, 54 pp. doi:10.2903/j.efsa.2010.1457
- EFSA (European Food Safety Authority), 2011a. Use of BMDS and PROAST software packages by EFSA Scientific Panels and Units for applying the Benchmark Dose (BMD) approach risk assessment. Technical Report. EFSA Supporting Publications 2011, EN-113, 190 pp.
- EFSA (European Food Safety Authority), 2011b. Guidance of EFSA on the use of the EFSA Comprehensive European Food Consumption Database in Exposure Assessment. *EFSA Journal* 2011;9(3):2097, 34 pp. doi:10.2903/j.efsa.2011.2097
- EFSA (European Food Safety Authority), 2011c. Overview of the procedures currently used at EFSA for the assessment of dietary exposure to different chemical substances. *EFSA Journal* 2011;9(12):2490, 33 pp. doi:10.2903/j.efsa.2011.2490
- EFSA (European Food Safety Authority), 2011d. Evaluation of the FoodEx, the food classification system applied to the development of the EFSA Comprehensive European Food Consumption Database. *EFSA Journal* 2011;9(3):1970, 27 pp. doi:10.2903/j.efsa.2011.1970
- EFSA (European Food Safety Authority), 2015. Scientific report on Principles and process for dealing with data and evidence in scientific assessments. *EFSA Journal* 2015;13(5):4121, 35 pp. doi:10.2903/j.efsa.2015.4121
- EFSA FEEDAP Panel (EFSA Panel on Additives and Products or Substances used in Animal Feed), 2012. Guidance for the preparation of dossiers for sensory additives. *EFSA Journal* 2012;10(1):2534, 26 pp. <https://doi.org/10.2903/j.efsa.2012.2534>
- EFSA SC (EFSA Scientific Committee), 2012a. Guidance on selected default values to be used by the EFSA Scientific Committee, Scientific Panels and Units in the absence of actual measured data. *EFSA Journal* 2012;10(3):2579, 32 pp. doi:10.2903/j.efsa.2012.2579

- EFSA SC (EFSA Scientific Committee), 2012b. Scientific Opinion on Risk Assessment Terminology. EFSA Journal 2012;10(5):2664, 43 pp. doi:10.2903/j.efsa.2012.2664
- Elliott JE, Kennedy SW and Lorenzen A, 1997. Comparative toxicity of polychlorinated biphenyls to Japanese quail (*Coturnix c-japonica*) and American kestrels (*Falco sparverius*). Journal of Toxicology and Environmental Health, 51, 57-75. doi:10.1080/009841097160221
- El-Sabeawy F, Enan E and Lasley B, 2001. Biochemical and toxic effects of 2,3,7,8-tetrachlorodibenzo-*p*-dioxin in immature male and female chickens. Comparative Biochemistry and Physiology C-Toxicology & Pharmacology, 129, 317-327. doi:10.1016/s1532-0456(01)00199-5
- Endicott DD and Cook PM, 1994. Modeling the partitioning and bioaccumulation of TCDD and other hydrophobic organic-chemicals in Lake Ontario. Chemosphere, 28, 75-87. doi:10.1016/0045-6535(94)90202-x
- Eskenazi B, Mocarelli P, Warner M, Samuels S, Vercellini P, Olive D, Needham LL, Patterson DG, Brambilla P, Gavoni N, Casalini S, Panazza S, Turner W and Gerthoux PM, 2002a. Serum dioxin concentrations and endometriosis: A cohort study in Seveso, Italy. Environmental Health Perspectives, 110, 629-634.
- Eskenazi B, Warner M, Mocarelli P, Samuels S, Needham LL, Patterson DG, Lippman S, Vercellini P, Gerthoux PM, Brambilla P and Olive D, 2002b. Serum dioxin concentrations and menstrual cycle characteristics. American Journal of Epidemiology, 156, 383-392. doi:10.1093/aje/kwf046
- Eskenazi B, Mocarelli P, Warner M, Chee WY, Gerthoux PM, Samuels S, Needham LL and Patterson DG, 2003. Maternal serum dioxin levels and birth outcomes in Women of Seveso, Italy. Environmental Health Perspectives, 111, 947-953. doi:10.1289/ehp.6080
- Eskenazi B, Warner M, Marks AR, Samuels S, Gerthoux PM, Vercellini P, Olive DL, Needham L, Patterson DG and Mocarelli P, 2005. Serum dioxin concentrations and age at menopause. Environmental Health Perspectives, 113, 858-862. doi:10.1289/ehp.7820
- Eskenazi B, Warner M, Samuels S, Young J, Gerthoux PM, Needham L, Patterson D, Olive D, Gavoni N, Vercellini P and Mocarelli P, 2007. Serum dioxin concentrations and risk of uterine leiomyoma in the Seveso Women's Health Study. American Journal of Epidemiology, 166, 79-87. doi:10.1093/aje/kwm048
- Eskenazi B, Warner M, Marks AR, Samuels S, Needham L, Brambilla P and Mocarelli P, 2010. Serum Dioxin Concentrations and Time to Pregnancy. Epidemiology, 21, 224-231. doi:10.1097/EDE.0b013e3181cb8b95
- Eskenazi B, Warner M, Sirtori M, Fuerst T, Rauch SA, Brambilla P, Mocarelli P and Rubinacci A, 2014. Serum Dioxin Concentrations and Bone Density and Structure in the Seveso Women's Health Study. Environmental Health Perspectives, 122, 51-57. doi:10.1289/ehp.1306788
- Ewing WN, 2002. The FEEDS Directory: branded Products Guide. Context, Leicestershire, UK, ISBN13:9781899043026, 220 pp. Available online: <https://www.contextbookshop.com/books/the-feeds-directory-branded-products-guide>
- Fader KA, Nault R, Ammendolia DA, Harkema JR, Williams KJ, Crawford RB, Kaminski NE, Potter D, Sharratt B and Zacharewski TR, 2015. 2,3,7,8-Tetrachlorodibenzo-*p*-Dioxin Alters Lipid Metabolism and Depletes Immune Cell Populations in the Jejunum of C57BL/6 Mice. Toxicological Sciences, 148, 567-580. doi:10.1093/toxsci/kfv206
- Fan L, Ovadia M, Friedman DM and Rifkind AB, 2000. Ventricular preexcitation sensitive to flecainide in late stage chick embryo ECGs: 2,3,7,8-tetrachlorodibenzo-*p*-dioxin impairs inotropic but not chronotropic or dromotropic responses to isoproterenol and confers resistance to flecainide. Toxicology and Applied Pharmacology, 166, 43-50. doi:10.1006/taap.2000.8948
- Fanelli F, Bertoni MP, Castelli MG, Chiabrando C, Martelli GP, Nosedà A, Garattini S, Binaghi C, Marazza V and Pezza F, 1980. 2,3,7,8-Tetrachlorodibenzo-*p*-dioxin toxic effects and tissue levels in animals from the contaminated area of Seveso, Italy. Archives of Environmental Contam and Toxicology, 9, 569-577.



- Faqi AS, Dalsenter PR, Mathar W, Heinrich-Hirsch B and Chahoud I, 1998a. Reproductive toxicity and tissue concentrations of 3,3',4,4'-tetrachlorobiphenyl (PCB 77) in male adult rats. *Human and Experimental Toxicology*, 17, 151-156.
- Faqi AS, Dalsenter PR, Merker HJ and Chahoud I, 1998b. Reproductive toxicity and tissue concentrations of low doses of 2,3,7,8-tetrachlorodibenzo-*p*-dioxin in male offspring rats exposed throughout pregnancy and lactation. *Toxicology and Applied Pharmacology*, 150, 383-392. doi:10.1006/taap.1998.8433
- Fatemi MH and Chahi ZG, 2012. QSPR-based estimation of the half-lives for polychlorinated biphenyl congeners. *Sar and Qsar in Environmental Research*, 23, 155-168. doi:10.1080/1062936x.2011.645876
- Fatemi MH, Abraham MH and Haghdadi M, 2009. Prediction of biomagnification factors for some organochlorine compounds using linear free energy relationship parameters and artificial neural networks. *Sar and Qsar in Environmental Research*, 20, 453-465. doi:10.1080/10629360903278776
- Fattore E, Trossvik C and Håkansson H, 2000. Relative Potency Values Derived from Hepatic Vitamin A Reduction in Male and Female Sprague–Dawley Rats Following Subchronic Dietary Exposure to Individual Polychlorinated Dibenzo-*p*-dioxin and Dibenzofuran Congeners and a Mixture Thereof. *Toxicology and Applied Pharmacology* 165, 184–194.
- FEFAC (Federation Europeenne des Fabricants D'aliments Composes pour Animaux), 2009. Feed and Food: Statistical Yearbook 2009. Available from: <http://www.fefac.eu/file.pdf?FileID=326962009>
- Feidt C, Cavret S, grova N, Laurent C and Rychen G, 2005. Evaluation of the risk of PAHs and Dioxins transfer to humans via the dairy ruminant. *Environmental Chemistry*, 419-430.
- Feidt C, Ounnas F, Julien-David D, Jurjanz S, Toussaint H, Jondreville C and Rychen G, 2013. Relative bioavailability of soil-bound polychlorinated biphenyls in lactating goats. *J Dairy Sci*, 96, 3916-3923. doi:10.3168/jds.2012-6319
- Feil VJ, Huwe JK, Zaylskie RG, Davison KL, Anderson VL, Marchello M and Tiernan TO, 2000. Chlorinated dibenzo-*p*-dioxin and dibenzofuran concentrations in beef animals from a feeding study. *J Agric Food Chem*, 48, 6163-6173.
- Fernandes AR, Foxall C, Lovett A, Rose M and Dowding A, 2011. The assimilation of dioxins and PCBs in conventionally reared farm animals: occurrence and biotransfer factors. *Chemosphere*, 83, 815-822. doi:10.1016/j.chemosphere.2011.02.083
- Fierens S, Mairesse H, Heilier JF, De Burbure C, Focant JF, Eppe G, De Pauw E and Bernard A, 2003. Dioxin/polychlorinated biphenyl body burden, diabetes and endometriosis: findings in a population-based study in Belgium. *Biomarkers*, 8, 529-534. doi:10.1080/1354750032000158420
- Fierens T, Cornelis C, Standaert A, Sioen I, De Henauw S and Van Holderbeke, 2014. Modelling the environmental transfer of phthalates and polychlorinated dibenzo-*p*-dioxins and dibenzofurans into agricultural products: The EN-forc model. *Environmental Research*, 133, 282-293.
- Fisher JW, Campbell J, Muralidhara S, Bruckner JV, Ferguson D, Mumtaz M, Harmon B, Hedge JM, Crofton KM, Kim H and Almekinder TL, 2006. Effect of PCB 126 on hepatic metabolism of thyroxine and perturbations in the hypothalamic-pituitary-thyroid axis in the rat. *Toxicological Sciences*, 90, 87-95.
- Fisk AT, Yarechewski AL, Metner DA, Evans RE, Lockhart WL and Muir DCG, 1997. Accumulation, depuration and hepatic mixed-function oxidase enzyme induction in juvenile rainbow trout and lake whitefish exposed to dietary 2,3,7,8-tetrachlorodibenzo-*p*-dioxin. *Aquatic Toxicology*, 37, 201-220.
- Fisk AT, Hobson KA and Norstrom RJ, 2001. Influence of chemical and biological factors on trophic transfer of persistent organic pollutants in the northwater polynya marine food web. *Environ Sci Technol*, 35, 732-738.

- Fitzsimons JD, Huestis S and Williston B, 1995. Occurrence of a swim-up syndrome in Lake Ontario lake trout in relation to contaminants and cultural practices. *Journal of Great Lakes Research*, 21, 277-285.
- Flesch-Janys D, Steindorf K, Gurn P and Becher H, 1998. Estimation of the cumulated exposure to polychlorinated dibenzo-*p*-dioxins/furans and standardized mortality ratio analysis of cancer mortality by dose in an occupationally exposed cohort. *Environmental Health Perspectives*, 106, 655-662.
- Fletcher N, Hanberg A and Hakansson H, 2001. Hepatic vitamin A depletion is a sensitive marker of 2,3,7,8-tetrachlorodibenzo-*p*-dioxin (TCDD) exposure in four rodent species. *Toxicological Sciences*, 62, 166-175.
- Flick DF, Firestone D and Higginbotham GR, 1972. Studies of the chick edema disease part 9 response of chicks fed or singly administered synthetic edema producing compounds. *Poultry Science*, 51, 2026-2034. doi:10.3382/ps.0512026
- Foekema EM, Lopez Parron M, Mergia MT, Carolus ER, vd Berg JH, Kwadijk C, Dao Q and Murk AJ, 2014. Internal effect concentrations of organic substances for early life development of egg-exposed fish. *Ecotoxicol Environ Saf*, 101, 14-22. doi:10.1016/j.ecoenv.2013.12.006
- Foekema EM, Kotterman M, de Vries P and Murk AJ, 2016. Maternally transferred dioxin-like compounds can affect the reproductive success of European eel. *Environmental Toxicology and Chemistry*, 35, 241-246. doi:10.1002/etc.3160
- Foster EP and Curtis LR, 1999. 2,2',4,4',5,5'- and 3,3',4,4',5,5'-Hexachlorobiphenyl pretreatments alter the biliary excretion of a challenge dose of 7,12-(3H)dimethylbenz(a)anthracene in rainbow trout (*Oncorhynchus mykiss*). *Canadian Journal of Fisheries and Aquatic Sciences*, 56, 642-649. doi:10.1139/cjfas-56-4-642
- Foster EP, Fitzpatrick MS, Feist GW, Schreck CB, Yates J, Spitsbergen JM and Heidel JR, 2001. Plasma androgen correlation, EROD induction, reduced condition factor, and the occurrence of organochlorine pollutants in reproductively immature white sturgeon (*Acipenser transmontanus*) from the Columbia River, USA. *Archives of Environmental Contamination and Toxicology*, 41, 182-191.
- Foster WG, Holloway AC and Hughes CL, 2005. Dioxin-like activity and maternal thyroid hormone levels in second trimester maternal serum. *American Journal of Obstetrics and Gynecology*, 193, 1900-1907. doi:10.1016/j.ajog.2005.08.013
- Fournier A, Feidt C, Travel A, Le Bizec B, Venisseau A, Marchand P and Jondreville C, 2012. Relative bioavailability to laying hens of indicator polychlorobiphenyls present in soil. *Chemosphere*, 88, 300-306. doi:10.1016/j.chemosphere.2012.02.041
- Fournier A, Rychen G, Marchand P, Toussaint H, Le Bizec B and Feidt C, 2013. Polychlorinated biphenyl (PCB) decontamination kinetics in lactating goats (*Capra hircus*) following a contaminated corn silage exposure. *J Agric Food Chem*, 61, 7156-7164. doi:10.1021/jf401048j
- Fouzy ASM and Ruoff U, 2006. Distribution of PCDDs/PCDFs into milk and organs of Egyptian Baladi goats after oral supplementation of dioxins. *Kieler Milchwirtschaftliche Forschungsberichte*, 58, 5-15.
- Fouzy ASM, El-Loly MM and Ghazi YA, 2008. Effect of dioxins on properties of Egyptian goats' milk and blood profile with relation to mastitis. *International Journal of Dairy Science*, 3, 1-10. Doi:10.3923/ijds.2008.1.10
- Fox LL and Grasman KA, 1999. Effects of PCB 126 on primary immune organ development in chicken embryos. *Journal of Toxicology and Environmental Health-Part A*, 58, 233-244. doi:10.1080/009841099157313
- Frakes RA, Zeeman CQT and Mower B, 1993. Bioaccumulation of 2,3,7,8-tetrachlorodibenzo-*p*-dioxin (TCDD) by fish downstream of pulp and paper-mills in Maine. *Ecotoxicology and Environmental Safety*, 25, 244-252. doi:10.1006/eesa.1993.1023

- Fries GF, Paustenbach DJ, Mather DB and Luksemburg WJ, 1999. A congener specific evaluation of transfer of chlorinated dibenzo-*p*-dioxins and dibenzofurans to milk of cows following ingestion of pentachlorophenol-treated wood. *Environmental Science and Technology*, 33, 1165-1170. doi:10.1021/es981153d
- Fries GF, Paustenbach DJ and Luksemburg WJ, 2002. Complete mass balance of dietary polychlorinated dibenzo-*p*-dioxins and dibenzofurans in dairy cattle and characterization of the apparent synthesis of hepta- and octachlorodioxins. *J Agric Food Chem*, 50, 4226-4231.
- Friesen EN, Skura BJ, Ikonomou MG, Oterhals A and Higgs DA, 2015. Influence of terrestrial lipid and protein sources and activated carbon-treated fish oil on levels of persistent organic pollutants and fatty acids in the flesh of Atlantic salmon. *Aquaculture Research*, 46, 358-381. doi:10.1111/are.12182
- Fujisawa N, Nakayama SMM, Ikenaka Y and Ishizuka M, 2014. TCDD-induced chick cardiotoxicity is abolished by a selective cyclooxygenase-2 (COX-2) inhibitor NS398. *Archives of Toxicology*, 88, 1739-1748. doi:10.1007/s00204-014-1225-7
- Fukushi J, Tokunaga S, Nakashima Y, Motomura G, Mitoma C, Uchi H, Furue M and Iwamoto Y, 2016. Effects of dioxin-related compounds on bone mineral density in patients affected by the Yusho incident. *Chemosphere*, 145, 25-33. doi:10.1016/j.chemosphere.2015.11.091
- Geeraerts C, Focant JF, Eppe G, De Pauw E and Belpaire C, 2011. Reproduction of European eel jeopardised by high levels of dioxins and dioxin-like PCBs? *Sci Total Environ*, 409, 4039-4047. doi:10.1016/j.scitotenv.2011.05.046
- Genuardo V, Perucatti A, Iannuzzi A, Di Meo GP, Spagnuolo SM, Caputi-Jambrenghi A, Coletta A, Vonghia G and Iannuzzi L, 2012. Chromosome fragility in river buffalo cows exposed to dioxins. *Journal of Applied Genetics*, 53, 221-226. doi:10.1007/s13353-012-0092-2
- Gewurtz SB, Laposa R, Gandhi N, Christensen GN, Evenset A, Gregor D and Diamond ML, 2006. A comparison of contaminant dynamics in arctic and temperate fish: A modeling approach. *Chemosphere*, 63, 1328-1341. doi:10.1016/j.chemosphere.2005.09.031
- Gewurtz SB, Lega R, Crozier PW, Whittle DM, Fayez L, Reiner EJ, Helm PA, Marvin CH and Tomy GT, 2009. Factors influencing trends of polychlorinated naphthalenes and other dioxin-like compounds in lake trout (*Salvelinus namaycush*) from Lake Ontario, North America (1979-2004). *Environ Toxicol Chem*, 28, 921-930. doi:10.1897/08-307.1
- Giesy JP, Kannan K, Kubitz JA, Williams LL and Zabik MJ, 1999. Polychlorinated dibenzo-*p*-dioxins (PCDDs) and dibenzofurans (PCDFs) in muscle and eggs of salmonid fishes from the Great Lakes. *Archives of Environmental Contamination and Toxicology*, 36, 432-446.
- Giesy JP, Jones PD, Kannan K, Newsted JL, Tillitt DE and Williams LL, 2002. Effects of chronic dietary exposure to environmentally relevant concentrations to 2,3,7,8-tetrachlorodibenzo-*p*-dioxin on survival, growth, reproduction and biochemical responses of female rainbow trout (*Oncorhynchus mykiss*). *Aquat Toxicol*, 59, 35-53.
- Gilbert ML, Cloutier MJ and Spear PA, 1995. Retinoic acid hydroxylation in rainbow-trout (*Oncorhynchus mykiss*) and the effects of a coplanar PCB, 3,3',4,4'-tetrachlorobiphenyl. *Aquatic Toxicology*, 32, 177-187.
- Goff KF, Hull BE and Grasman KA, 2005. Effects of PCB 126 on primary immune organs and thymocyte apoptosis in chicken embryos. *J Toxicol Environ Health A*, 68, 485-500. doi:10.1080/15287390590903720
- Goldstein JA, McKinney JD, Lucier GW, Hickman P, Bergman H and Moore JA, 1976. Toxicological assessment of hexachlorobiphenyl isomers and 2,3,7,8-tetrachlorodibenzofuran in chicks. II. Effects on drug metabolism and porphyrin accumulation. *Toxicol Appl Pharmacol*, 36, 81-92. doi:10.1016/0041-008X(76)90027-2
- Gould JC, Cooper KR and Scanes CG, 1997. Effects of polychlorinated biphenyl mixtures and three specific congeners on growth and circulating growth-related hormones. *General and Comparative Endocrinology*, 106, 221-230. doi:10.1006/gcen.1996.6868

- Gould JC, Cooper KR and Scanes CG, 1999. Effects of polychlorinated biphenyls on thyroid hormones and liver type I monodeiodinase in the chick embryo. *Ecotoxicology and Environmental Safety*, 43, 195-203. doi:10.1006/eesa.1999.1776
- Govarts E, Remy S, Bruckers L, Den Hond E, Sioen I, Nelen V, Baeyens W, Nawrot TS, Loots I, Van Larebeke N and Schoeters G, 2016. Combined Effects of Prenatal Exposures to Environmental Chemicals on Birth Weight. *International Journal of Environmental Research and Public Health*, 13, 495. doi:10.3390/ijerph1305049
- Grasman KA and Whitacre LL, 2001. Effects of PCB 126 on thymocyte surface marker expression and immune organ development in chicken embryos. *Journal of Toxicology and Environmental Health-Part A*, 62, 191-206. doi:10.1080/009841001458307
- Greco L, Serrano R, Blanes MA, Serrano E and Capri E, 2010. *Bioaccumulation markers and biochemical responses in European sea bass (Dicentrarchus labrax) raised under different environmental conditions.* *Ecotoxicol Environ Saf*, 73, 38-45. doi:10.1016/j.ecoenv.2009.09.011
- Greig JB, Jones G, Butler WH and Barnes JM, 1973. Toxic effects of 2,3,7,8-tetrachlorodibenzo-*p*-dioxin. *Food Cosmet Toxicol*, 11, 585-595. doi:10.1016/S0015-6264(73)80329-3
- Grova N, Feidt C, Laurent C and Rychen G, 2002. C-14 Milk, urine and faeces excretion kinetics in lactating goats after an oral administration of C-14 polycyclic aromatic hydrocarbons. *International Dairy Journal*, 12, 1025-1031. doi:10.1016/s0958-6946(02)00126-7
- Guiney PD, Cook PM, Casselman JM, Fitzsimmons JD, Simonin HA, Zabel EW and Peterson RE, 1996. Assessment of 2,3,7,8-tetrachlorodibenzo-*p*-dioxin induced sac fry mortality in lake trout (*Salvelinus namaycush*) from different regions of the Great Lakes. *Canadian Journal of Fisheries and Aquatic Sciences*, 53, 2080-2092. doi:10.1139/cjfas-53-9-2080
- Guiney PD, Walker MK, Spitsbergen JM and Peterson RE, 2000. Hemodynamic dysfunction and cytochrome P4501A mRNA expression induced by 2,3,7,8-tetrachlorodibenzo-*p*-dioxin during embryonic stages of lake trout development. *Toxicol Appl Pharmacol*, 168, 1-14. doi:10.1006/taap.2000.8999
- Gupta A, Ketchum N, Roehrborn CG, Schechter A, Aragaki CC and Michalek JE, 2006. Serum Dioxin, Testosterone, and Subsequent Risk of Benign Prostatic Hyperplasia: A Prospective Cohort Study of Air Force Veterans. *Environmental Health Perspectives*, 114, 1649-1654.
- Gutleb AC, Lilienthal H, Erhard HW, Zimmer KE, Skaare JU and Ropstad E, 2011. Effects of pre- and postnatal polychlorinated biphenyl exposure on emotional reactivity observed in lambs before weaning. *Ecotoxicology and Environmental Safety*, 74, 1396-1401. doi:10.1016/j.ecoenv.2011.03.004
- Hailey JR, Walker NJ, Sells DM, Brix AE, Jokinen MP and Nyska A, 2005. Classification of proliferative hepatocellular lesions in Harlan Sprague-Dawley rats chronically exposed to dioxin-like compounds. *Toxicologic Pathology*, 33, 165-174.
- Hajslova J, Schoula R, Kocourek V, Gregor P, Kohoutkova J, Holadova K, Poustka J, Svobodova Z and Vykusova B, 1997. Elimination of PCBs from heavily contaminated carp (*Cyprinus carpio* L) in clean water-depuration study. *Bulletin of Environmental Contamination and Toxicology*, 59, 452-459.
- Halldorsson TI, Thorsdottir I, Meltzer HM, Strom M and Olsen SF, 2009. Dioxin-like activity in plasma among Danish pregnant women: dietary predictors, birth weight and infant development. *Environ Res*, 109, 22-28. doi:10.1016/j.envres.2008.08.011
- Halperin W, Vogt R, Sweeney MH, Shopp G, Fingerhut M and Petersen M, 1998. Immunological markers among workers exposed to 2,3,7,8-tetrachlorodibenzo-*p*-dioxin. *Occup Environ Med*, 55, 742-749. doi:10.1136/oem.55.11.742
- Hamm JT, Chen CY and Birnbaum LS, 2003. A mixture of dioxins, furans, and non-ortho PCBs based upon consensus toxic equivalency factors produces dioxin-like reproductive effects. *Toxicological Sciences*, 74, 182-191. doi:10.1093/toxsci/kfg107

- Han G, Ding G, Lou X, Wang X, Han J, Shen H, Zhou Y and Du L, 2011. Correlations of PCBs, DIOXIN, and PBDE with TSH in Children's Blood in Areas of Computer E-waste Recycling. *Biomedical and Environmental Sciences*, 24, 112-116. doi:10.3967/0895-3988.2011.02.004
- Harrill JA, Layko D, Nyska A, Hukkanen RR, Manno RA, Grasseti A, Lawson M, Martin G, Budinsky RA, Rowlands JC and Thomas RS, 2016. Aryl hydrocarbon receptor knockout rats are insensitive to the pathological effects of repeated oral exposure to 2,3,7,8-tetrachlorodibenzo-*p*-dioxin. *Journal of Applied Toxicology*, 36, 802-814. doi:10.1002/jat.3211
- Hart LJ, Gogal RM, Smith SA, Smith BJ, Robertson J and Holladay SD, 1999. Leukocyte hypocellularity in the spleen and pronephros of tilapia (*Oreochromis niloticus*) exposed to 2,3,7,8-tetrachlorodibenzo-*p*-dioxin (TCDD) may result from antiproliferative effects and enhanced apoptosis. *Toxic Substance Mechanisms*, 18, 21-38.
- Hassoun EA, Li F, Abushaban A and Stohs SJ, 2001. Production of superoxide anion, lipid peroxidation and DNA damage in the hepatic and brain tissues of rats after subchronic exposure to mixtures of TCDD and its congeners. *Journal of Applied Toxicology*, 21, 211-219.
- Hawkes CL and Norris LA, 1977. Chronic oral toxicity of 2,3,7,8-tetrachlorodibenzo-para-dioxin (TCDD) to rainbow-trout. *Transactions of the American Fisheries Society*, 106, 641-645. doi:10.1577/1548-8659(1977)106<641:cotott>2.0.co;2
- Heaton SN, Bursian SJ, Giesy JP, Tillit DE, Render JA, Jones PD, Verbrugge DA, Kubiak TJ and Aulerich RJ, 1995a. Dietary exposure of mink to carp from Saginaw Bay, Michigan. 1. Effects on reproduction and survival, and the potential risks to wild mink populations. *Archives of Environmental Contamination and Toxicology*, 28, 334-343.
- Heaton SN, Bursian SJ, Giesy JP, Tillit DE, Render JA, Jones PD, Verbrugge DA, Kubiak TJ and Aulerich RJ, 1995b. Dietary exposure of mink to carp from Saginaw Bay, Michigan: 2. Hematology and liver pathology. *Archives of Environmental Contamination and Toxicology*, 29, 411-417.
- Heederik D, Hooiveld M and Bueno-de-Mesquita HB, 1998. Modelling of 2,3,7,8-tetrachlorodibenzo-*p*-dioxin levels in a cohort of workers with exposure to phenoxy herbicides and chlorophenols. *Chemosphere*, 37, 1743-1754. doi: 10.1016/S0045-6535(98)00239-2
- Heid SE, Walker MK and Swanson HI, 2001. Correlation of cardiotoxicity mediated by halogenated aromatic hydrocarbons to aryl hydrocarbon receptor activation. *Toxicol Sci*, 61, 187-196.
- Heilier JF, Nackers F, Verougstraete V, Tonglet R, Lison D and Donnez J, 2005. Increased dioxin-like compounds in the serum of women with peritoneal endometriosis and deep endometriotic (adenomyotic) nodules. *Fertility and sterility*, 84, 305-312. doi:10.1016/j.fertnstert.2005.04.001
- Hektoen H, Ingebrigtsen K, Brevik EM and Oehme M, 1992. Interspecies differences in tissue distribution of 2,3,7,8-tetrachlorodibenzo-para-dioxin between cod (*Gadus morhua*) and rainbow-trout (*Oncorhynchus mykiss*). *Chemosphere*, 24, 581-587.
- Hektoen H, Bernhoft A, Ingebrigtsen K, Skaare JU and Goksoyr A, 1994. Response of hepatic xenobiotic-metabolizing enzymes in rainbow-trout (*Oncorhynchus mykiss*) and cod (*Gadus morhua*) to 2,3,7,8-tetrachlorodibenzo-*p*-dioxin (2,3,7,8-TCDD). *Aquatic Toxicology*, 28, 97-106. doi:10.1016/0166-445x(94)90023-x
- Helder T, 1981. Effects of 2,3,7,8-tetrachlorodibenzo-dioxin (TCDD) on early life stages of rainbow trout (*Salmo gairdneri*, Richardson). *Toxicology*, 19, 101-112.
- Helder T, Stutterheim E and Olie K, 1982. The toxicity and toxic potential of fly-ash from municipal incinerators assessed by means of a fish early life stage test. *Chemosphere*, 11, 965-972. doi:10.1016/0045-6535(82)90068-6
- Hellou J, Mackay D and Banoub J, 1999. Levels, persistence and bioavailability of organic contaminants present in marine harbor sediments impacted by raw sewage. *Chemosphere*, 38, 457-473.
- Helm PA, Gewurtz SB, Whittle DM, Marvin CH, Fisk AT and Tomy GT, 2008. Occurrence and biomagnification of polychlorinated naphthalenes and non- and mono-ortho PCBs in Lake Ontario



- sediment and biota. *Environmental Science and Technology*, 42, 1024-1031. doi:10.1021/es071819g
- Hendriks AJ, Pieters H and de Boer J, 1998. Accumulation of metals, polycyclic (halogenated) aromatic hydrocarbons, and biocides in zebra mussel and eel from the Rhine and Meuse rivers. *Environmental Toxicology and Chemistry*, 17, 1885-1898. doi:10.1897/1551-5028(1998)017<1885:aompha>2.3.co;2
- Henshel DS, 1998. Developmental neurotoxic effects of dioxin and dioxin-like compounds on domestic and wild avian species. *Environmental Toxicology and Chemistry*, 17, 88-98. doi:10.1002/etc.5620170111
- Henshel DS, Hehn B, Wagey R, Vo M and Steeves JD, 1997a. The relative sensitivity of chicken embryos to yolk- or air-cell-injected 2,3,7,8-tetrachlorodibenzo-*p*-dioxin. *Environmental Toxicology and Chemistry*, 16, 725-732. doi:10.1002/etc.5620160417
- Henshel DS, Martin JW and Dewitt JC, 1997b. Brain asymmetry as a potential biomarker for developmental TCDD intoxication: A dose-response study. *Environmental Health Perspectives*, 105, 718-725. doi:10.1289/ehp.97105718
- Herlin M, Kalantari F, Stern N, Sand S, Larsson S, Viluksela M, Tuomisto JT, Tuomisto J, Tuukkanen J, Jamsa T, Lind PM and Hakansson H, 2010. Quantitative characterization of changes in bone geometry, mineral density and biomechanical properties in two rat strains with different Ah-receptor structures after long-term exposure to 2,3,7,8-tetrachlorodibenzo-*p*-dioxin. *Toxicology*, 273, 1-11. doi:10.1016/j.tox.2010.04.006
- Hermesen SAB, Larsson S, Arima A, Muneoka A, Ihara T, Sumida H, Fukusato T, Kubota S, Yasuda M and Lind PM, 2008. *In utero* and lactational exposure to 2,3,7,8-tetrachlorodibenzo-*p*-dioxin (TCDD) affects bone tissue in rhesus monkeys. *Toxicology*, 253, 147-152.
- Higgins JPT and Green S (editors), 2011. *Cochrane Handbook for Systematic Reviews of Interventions* Version 5.1.0 [updated March 2011]. The Cochrane Collaboration, 2011. Available from [www.cochrane-handbook.org](http://www.cochrane-handbook.org)
- Hilscherova K, Blankenship AL, Nie M, Coady KK, Upham BL, Trosko JE and Giesy JP, 2003. Oxidative stress in liver and brain of the hatchling chicken (*Gallus domesticus*) following *in ovo* injection with TCDD. *Comparative Biochemistry and Physiology C-Toxicology & Pharmacology*, 136, 29-45. doi:10.1016/s1532-0456(03)00167-4
- Hinck JE, Blazer VS, Denslow ND, Echols KR, Gross TS, May TW, Anderson PJ, Coyle JJ and Tillitt DE, 2007. Chemical contaminants, health indicators, and reproductive biomarker responses in fish from the Colorado River and its tributaries. *Science of the Total Environment*, 378, 376-402. doi:10.1016/j.scitotenv.2007.02.032
- Hinck JE, Blazer VS, Denslow ND, Echols KR, Gale RW, Wieser C, Maya TW, Eilersiecke M, Coyle JJ and Tillitt DE, 2008. Chemical contaminants, health indicators, and reproductive biomarker responses in fish from rivers in the Southeastern United States. *Science of the Total Environment*, 390, 538-557. doi:10.1016/j.scitotenv.2007.10.026
- Hirai Y, Sakai S-I, Watanabe N and Takatsuki H, 2004. Congener-specific intake fractions for PCDDs/DFs and Co-PCBs: modeling and validation. *Chemosphere*, 54, 1383-1400.
- Hirako M, Aoki M, Kimura K, Hanafusa Y, Ishizaki H and Kariya Y, 2005. Comparison of the concentrations of polychlorinated dibenzo-*p*-dioxins, dibenzofurans, and dioxin-like polychlorinated biphenyls in maternal and fetal blood, amniotic and allantoic fluids in cattle. *Reprod Toxicol*, 20, 247-254. doi:10.1016/j.reprotox.2005.01.011
- Hirako M, 2008a. Transfer and accumulation of persistent organochlorine compounds from bovine dams to newborn and suckling calves. *J Agric Food Chem*, 56, 6768-6774. doi:10.1021/jf8010118
- Hirako M, 2008b. Distribution of PCDDs, PCDFs and dioxin-like PCBs in the blood, testis and adipose tissue of suckling beef calves. *Chemosphere*, 71, 219-226. doi:10.1016/j.chemosphere.2007.09.047

- Hochstein JR, Aulerich RJ and Bursian SJ, 1988. Acute toxicity of 2,3,7,8-tetrachlorodibenzo-*p*-dioxin to mink. *Archives of Environmental Contamination and Toxicology*, 17, 33-37.
- Hochstein JR, Bursian SJ and Aulerich RJ, 1998. Effects of dietary exposure to 2,3,7,8-tetrachlorodibenzo-*p*-dioxin in adult female mink (*Mustela vison*). *Archives of Environmental Contamination and Toxicology*, 35, 348-353.
- Hochstein JR, Render JA, Bursian SJ and Aulerich RJ, 2001. Chronic toxicity of dietary 2,3,7,8-tetrachlorodibenzo-*p*-dioxin to mink. *Veterinary and Human Toxicology*, 43, 134-139.
- Hodson PV, McWhirter M, Ralph K, Gray B, Thivierge D, Carey JH, Vanderkraak G, Whittle DM and Levesque MC, 1992. Effects of bleached kraft mill effluent on fish in the St. Maurice river, Quebec. *Environmental Toxicology and Chemistry*, 11, 1635-1651. doi:10.1897/1552-8618(1992)11[1635:eobkme]2.0.co;2
- Hoekstra PF, O'Hara TM, Fisk AT, Borga K, Solomon KR and Muir DC, 2003. Trophic transfer of persistent organochlorine contaminants (OCs) within an Arctic marine food web from the southern Beaufort-Chukchi Seas. *Environ Pollut*, 124, 509-522.
- Hoffman DJ, Melancon MJ, Klein PN, Eisemann JD and Spann JW, 1998. Comparative developmental toxicity of planar polychlorinated biphenyl congeners in chickens, American kestrels, and common terns. *Environmental Toxicology and Chemistry*, 17, 747-757. doi:10.1002/etc.5620170432
- Hoogenboom LA, Kan CA, Bovee TF, van der Weg G, Onstenk C and Traag WA, 2004. Residues of dioxins and PCBs in fat of growing pigs and broilers fed contaminated feed. *Chemosphere*, 57, 35-42. doi:10.1016/j.chemosphere.2004.04.057
- Hoogenboom LAP, Kan CA, Zeilmaker MJ, Eijkeren van JCH and Traag WA, 2006. Carry-over of dioxins and PCBs from feed and soil to eggs at low contamination levels. *Food Additives and Contaminants* 23, 518-527.
- Hoogenboom LAP, Van Eijkeren JCH, Zeilmaker MJ, Mengelers MJB, Herbes R, Immerzeel J and Traag WA, 2007. A novel source for dioxins present in recycled fat from gelatin production. *Chemosphere*, 68, 814-823. doi:10.1016/j.chemosphere.2007.02.032
- Hoogenboom R, Zeilmaker M, Eijkeren J, Kan K, Mengelers M, Luykx D and Traag W, 2010. Kaolinic clay derived PCDD/Fs in the feed chain from a sorting process for potatoes. *Chemosphere*, 78, 99-105. doi:10.1016/j.chemosphere.2009.10.016
- Hoogenboom RL, Klop A, Herbes R, van Eijkeren JC, Zeilmaker MJ, van Vuuren AM and Traag WA, 2015a. Carry-over of polychlorinated dibenzo-*p*-dioxins and dibenzofurans (PCDD/Fs) and polychlorinated biphenyls (PCBs) in dairy cows fed smoke contaminated maize silage or sugar beet pulp. *Chemosphere*, 137, 214-220. doi:10.1016/j.chemosphere.2015.07.040
- Hoogenboom RL, Stark ML, Spolders M, Zeilmaker MJ, Traag WA, Ten Dam G and Schafft HA, 2015b. Accumulation of polychlorinated dibenzo-*p*-dioxins, dibenzofurans, and biphenyls in livers of young sheep. *Chemosphere*, 122, 137-144. doi:10.1016/j.chemosphere.2014.11.030
- Hooiveld M, Heederik DJ, Kogevinas M, Boffetta P, Needham LL, Patterson DG, Jr. and Bueno-de-Mesquita HB, 1998. Second follow-up of a Dutch cohort occupationally exposed to phenoxy herbicides, chlorophenols, and contaminants. *Am J Epidemiol*, 147, 891-901.
- Hornung MW, Miller L, Goodman B, Melancon MJ and Peterson RE, 1998. Lack of developmental and reproductive toxicity of 2,3,3',4,4'-pentachlorobiphenyl (PCB 105) in ring-necked pheasants. *Archives of Environmental Contamination and Toxicology*, 35, 646-653.
- Hornung MW, Spitsbergen JM and Peterson RE, 1999. 2,3,7,8-Tetrachlorodibenzo-*p*-dioxin alters cardiovascular and craniofacial development and function in sac fry of rainbow trout (*Oncorhynchus mykiss*). *Toxicol Sci*, 47, 40-51.
- Houtman CJ, Booij P, van der Valk KM, van Bodegom PM, van den Ende F, Gerritsen AA, Lamoree MH, Legler J and Brouwer A, 2007. Biomonitoring of estrogenic exposure and identification of responsible compounds in bream from Dutch surface waters. *Environ Toxicol Chem*, 26, 898-907

- Huang A, Powell D and Chou K, 1998a. Pre- and postnatal exposure to 3,3',4,4'-tetrachlorobiphenyl: I. Effects on breeding ability and sperm fertilizing ability in male mice. *Archives of Environmental Contamination and Toxicology*, 34, 204-208.
- Huang A, Lin S, Inglis R, Powell D and Chou K, 1998b. Pre- and postnatal exposure to 3,3',4,4'-tetrachlorobiphenyl: II. Effects on the reproductive capacity and fertilizing ability of eggs in female mice. *Archives of Environmental Contamination and Toxicology*, 34, 209-214.
- Hui LL, Lam SH, Lau E, Nelson E, Wong TW and Fielding R, 2016. Prenatal dioxin exposure and neurocognitive development in Hong Kong 11-year-old children. *Environmental Research*, 150, 205-212. doi:10.1016/j.envres.2016.06.003
- Humblet O, Williams PL, Korricks SA, Sergeev O, Emond C, Birnbaum LS, Burns JS, Altshul L, Patterson DG, Turner WE, Lee MM, Revich B and Hauser R, 2011. Dioxin and Polychlorinated Biphenyl Concentrations in Mother's Serum and the Timing of Pubertal Onset in Sons. *Epidemiology*, 22, 827-835. doi:10.1097/EDE.0b013e318230b0d1
- Hurst CH, DeVito MJ, Setzer RW and Birnbaum LS, 2000. Acute administration of 2,3,7,8-tetrachlorodibenzo-*p*-dioxin (TCDD) in pregnant Long Evans rats: Association of measured tissue concentrations with developmental effects. *Toxicological Sciences*, 53, 411-420. doi:10.1093/toxsci/53.2.411
- Hutchinson TH, Field MDR and Manning MJ, 1999. Evaluation of immune function in juvenile turbot *Scophthalmus maximus* (L.) exposed to sediments contaminated with polychlorinated biphenyls. *Fish & Shellfish Immunology*, 9, 457-472. doi:10.1006/fsim.1998.0207
- Huuskonen S, Lindstrom-Seppa P, Koponen K and Roy S, 1996. Effects of non-ortho-substituted polychlorinated biphenyls (Congeners 77 and 126) on cytochrome P4501A and conjugation activities in rainbow trout (*Oncorhynchus mykiss*). *Comparative Biochemistry and Physiology C-Toxicology & Pharmacology*, 113, 205-213. doi:10.1016/0742-8413(95)02089-6
- Huwe JK, Davison K, Feil VJ, Larsen G, Lorentzen M, Zaylskie R and Tiernan TO, 2004. Levels of polychlorinated dibenzo-*p*-dioxins and dibenzofurans in cattle raised at agricultural research facilities across the USA and the influence of pentachlorophenol-treated wood. *Food Additives and Contaminants*, 21, 182-194.
- Huwe JK and Smith DJ, 2005. Laboratory and on-farm studies on the bioaccumulation and elimination of dioxins from a contaminated mineral supplement fed to dairy cows. *J Agric Food Chem*, 53, 2362-2370. doi:10.1021/jf0480997
- Huybrechts I, Sioen I, Boon PE, Ruprich J, Lafay L, Turrini A, Amiano P, Hirvonen T, De Neve M, Arcella D, Moschandreas J, Westerlund A, Ribas-Barba L, Hilbig A, Papoutsou S, Christensen T, Oltarzewski M, Virtanen S, Rehurkova I, Azpiri M, Sette S, Kersting M, Walkiewicz A, Serra-Majem L, Volatier JL, Trolle E, Tornaritis M, Busk L, Kafatos A, Fabiansson S, De Henauw S and Van Klaveren J, 2011. Dietary exposure assessments for children in Europe (the EXPOCHI project): rationale, methods and design. *Archives of Public Health*, 69, 4. doi: 10.1186/0778-7367-1169-1184.
- Iannuzzi L, Perucatti A, Di Meo GP, Polimeno F, Ciotola F, Incarnato D, Peretti V, Caputi-Jambrenghi A, Pecoraro A, Manniti F, D'Alessandro A and Vonghia G, 2004. Chromosome fragility in two sheep flocks exposed to dioxins during pasturage. *Mutagenesis*, 19, 355-359. doi:10.1093/mutage/geh041
- Iannuzzi L, Perucatti A, Genuardo V, Incarnato D, Peretti V, Rasero R, Nebbia C and Di Meo GP, 2009. Chromosome analyses in dairy cows exposed to dioxins and dioxin-like PCBs using the SCE test. *Italian Journal of Animal Science*, 8, 93-95.
- IARC (International Agency for Research on Cancer), 1997. IARC Monographs on the evaluation of carcinogenic risks to humans. Volume 69. Polychlorinated dibenzo-*para*-dioxins and polychlorinated dibenzofurans. IARC, Lyon, France.
- Iben C, Bohm J, Tausch H, Leibetseder J and Luf W, 2003. Dioxin residues in the edible tissue of broiler chicken. *Journal of Animal Physiology and Animal Nutrition*, 87, 142-148.



- Iida M, Bak SM, Murakami Y, Kim EY and Iwata H, 2014. Transient suppression of AHR activity in early red seabream embryos does not prevent the disruption of peripheral nerve projection by 2,3,7,8-tetrachlorodibenzo-*p*-dioxin. *Aquat Toxicol*, 154, 39-47. doi:10.1016/j.aquatox.2014.05.001
- Ikeno T, Miyashita C, Nakajima S, Kobayashi S, Yamazaki K, Saijo Y, Kita T, Sasaki S, Konishi K, Kajiwara J, Hori T and Kishi R, 2018. Effects of low-level prenatal exposure to dioxins on cognitive development in Japanese children at 42 months. *Sci Total Environ*, 618, 1423-1430. doi:10.1016/j.scitotenv.2017.09.267
- Ingebrigtsen K, Hektoen H, Andersson T, Bergman A and Brandt I, 1990. Species-specific accumulation of the polychlorinated biphenyl (PCB) 2,3,3',4,4'-pentachlorobiphenyl in fish brain - a comparison between cod (*Gadus morhua*) and rainbow-trout (*Oncorhynchus mykiss*). *Pharmacol Toxicol*, 67, 344-345.
- Ishaq R, Akerman G, Naf C, Balk L, Bandh C and Broman D, 1999. Organic pollutant characterization and toxicity testing of settling particulate matter by nanoinjection in sea trout (*Salmo trutta*) eggs. *Environmental Toxicology and Chemistry*, 18, 533-543. doi:10.1897/1551-5028(1999)018<0533:opcatt>2.3.co;2
- Ishimura R, Ohsako S, Miyabara Y, Sakaue M, Kawakami T, Aoki Y, Yonemoto J and Tohyama C, 2002. Increased glycogen content and glucose transporter 3 mRNA level in the placenta of Holtzman rats after exposure to 2,3,7,8-tetrachlorodibenzo-*p*-dioxin. *Toxicology and Applied Pharmacology*, 178, 161-171.
- Isosaari P, Vartiainen T, Hallikainen A and Ruohonen K, 2002. Feeding trial on rainbow trout: comparison of dry fish feed and Baltic herring as a source of PCDD/Fs and PCBs. *Chemosphere*, 48, 795-804. doi:10.1016/s0045-6535(02)00128-5
- Isosaari P, Kiviranta H, Lie O, Lundebye AK, Ritchie G and Vartiainen T, 2004. Accumulation and distribution of polychlorinated dibenzo-*p*-dioxin, dibenzofuran, and polychlorinated biphenyl congeners in Atlantic salmon (*Salmo salar*). *Environmental Toxicology and Chemistry*, 23, 1672-1679. doi:10.1897/03-367
- Iszatt N, Stigum H, Govarts E, Murinova LP, Schoeters G, Trnovec T, Legler J, Thomsen C, Koppen G and Eggesbo M, 2016. Perinatal exposure to dioxins and dioxin-like compounds and infant growth and body mass index at seven years: A pooled analysis of three European birth cohorts. *Environment International*, 94, 399-407. doi:10.1016/j.envint.2016.04.040
- Ivnitski I, Elmaoued R and Walker MK, 2001. 2,3,7,8-tetrachlorodibenzo-*p*-dioxin (TCDD) inhibition of coronary development is preceded by a decrease in myocyte proliferation and an increase in cardiac apoptosis. *Teratology*, 64, 201-212. doi:10.1002/tera.1065
- Ivnitski-Steele ID and Walker MK, 2003. Vascular endothelial growth factor rescues 2,3,7,8-tetrachlorodibenzo-*p*-dioxin inhibition of coronary vasculogenesis. *Birth Defects Research Part a-Clinical and Molecular Teratology*, 67, 496-503. doi:10.1002/bdra.10074
- Ivnitski-Steele ID, Sanchez A and Walker MK, 2004. 2,3,7,8-Tetrachlorodibenzo-*p*-dioxin reduces myocardial hypoxia and vascular endothelial growth factor expression during chick embryo development. *Birth Defects Research Part a-Clinical and Molecular Teratology*, 70, 51-58. doi:10.1002/bdra.10151
- Ivnitski-Steele ID, Friggens M, Chavez M and Walker MK, 2005. 2,3,7,8-tetrachlorodibenzo-*p*-dioxin (TCDD) inhibition of coronary vasculogenesis is mediated, in part, by reduced responsiveness to endogenous angiogenic stimuli, including vascular endothelial growth factor A (VEGF-A). *Birth Defects Research Part a-Clinical and Molecular Teratology*, 73, 440-446. doi:10.1002/bdra.20137
- Jahnke A, Mayer P, McLachlan MS, Wickstrom H, Gilbert D and MacLeod M, 2014. Silicone passive equilibrium samplers as 'chemometers' in eels and sediments of a Swedish lake. *Environ Sci Process Impacts*, 16, 464-472. doi:10.1039/c3em00589e
- Jämsä T, Viluksela M, Tuomisto JT, Tuomisto J and Tuukkanen J, 2001. Effects of 2,3,7,8-tetrachlorodibenzo-*p*-dioxin on bone in two rat strains with different aryl hydrocarbon receptor structures. *Journal of Bone and Mineral Research*, 16, 1812-1820. doi:10.1359/jbmr.2001.16.10.1812

- Jan J, Vrecl M, Pogacnik A and Bavdek SV, 1999. Tissue distribution of planar and non-planar chlorobiphenyls, 4,4'-DDE and hexachlorobenzene in sheep and lambs. *Chemosphere*, 38, 2607-2612.
- Jan J, Vrecl M, Pogacnik A and Gaspersic D, 2001. Bioconcentration of lipophilic organochlorines in ovine dentine. *Arch Oral Biol*, 46, 1111-1116.
- Jan J, Milka V, Azra P, Dominik G and Matjaz Z, 2006. Distribution of organochlorine pollutants in ovine dental tissues and bone. *Environ Toxicol Pharmacol*, 21, 103-107. doi:10.1016/j.etap.2005.08.002
- Jan J, Ursic M and Vrecl M, 2013. Levels and distribution of organochlorine pollutants in primary dental tissues and bone of lamb. *Environmental toxicology and Pharmacology*, 36, 1040-1045.
- Janz DM and Bellward GD, 1996a. *In ovo* 2,3,7,8-tetrachlorodibenzo-*p*-dioxin exposure in three avian species .1. Effects on thyroid hormones and growth during the perinatal period. *Toxicology and Applied Pharmacology*, 139, 281-291. doi:10.1006/taap.1996.0167
- Janz DM and Bellward GD, 1996b. *In ovo* 2,3,7,8-tetrachlorodibenzo-*p*-dioxin exposure in three avian species. 2. Effects on estrogen receptor and plasma sex steroid hormones during the perinatal period. *Toxicology and Applied Pharmacology*, 139, 292-300.
- Jin X, Kennedy SW, Di Muccio T and Moon TW, 2001. Role of oxidative stress and antioxidant defense in 3,3',4,4',5-pentachlorobiphenyl-induced toxicity and species-differential sensitivity in chicken and duck embryos. *Toxicol Appl Pharmacol*, 172, 241-248. doi:10.1006/taap.2001.9150
- Johnson JE, Heckathorn WD and Thompson AL, 1996. Dispersal and persistence of 2,3,7,8-tetrachlorodibenzo-*p*-dioxin (TCDD) in a contaminated aquatic ecosystem, Bayou Meto, Arkansas. *Transactions of the American Fisheries Society*, 125, 450-457. doi:10.1577/1548-8659(1996)125<0450:dapotp>2.3.co;2
- Johnson ES, Shorter C, Bestervelt LL, Patterson DG, Needham LL, Piper WN, Lucier G and Nolan CJ, 2001. Serum hormone levels in humans with low serum concentrations of 2,3,7,8-TCDD. *Toxicology and Industrial Health*, 17, 105-112. doi:10.1191/0748233701th096oa
- Jones PD, Kannan K, Newsted JL, Tillitt DE, Williams LL and Giesy JP, 2001. Accumulation of 2,3,7,8-tetrachlorodibenzo-*p*-dioxin by rainbow trout (*Onchorhynchus mykiss*) at environmentally relevant dietary concentrations. *Environ Toxicol Chem*, 20, 344-350.
- Jung D, Berg PA, Edler L, Ehrental W, Fenner D, Flesch-Janys D, Huber C, Klein R, Koitka C, Lucier G, Manz A, Muttray A, Needham L, Papke O, Pietsch M, Portier C, Patterson D, Prellwitz W, Rose DM, Thews A and Konietzko J, 1998. Immunologic findings in workers formerly exposed to 2,3,7,8-tetrachlorodibenzo-*p*-dioxin and its congeners. *Environmental Health Perspectives*, 106, 689-695. doi:10.2307/3433821
- Kekeyama M, Sone H, Miyabara Y and Tohyama C, 2003. Perinatal exposure to 2,3,7,8-tetrachlorodibenzo-*p*-dioxin alters activity-dependent expression of BDNF mRNA in the neocortex and male rat sexual behavior in adulthood. *Neurotoxicology*, 24, 207-217.
- Kang HK, Dalager NA, Needham LL, Patterson DG, Jr., Lees PS, Yates K and Matanoski GM, 2006. Health status of Army Chemical Corps Vietnam veterans who sprayed defoliant in Vietnam. *Am J Ind Med*, 49, 875-884. doi:10.1002/ajim.20385
- Kanzawa N, Kondo M, Okushima T, Yamaguchi M, Temmei Y, Honda M and Tsuchiya T, 2004. Biochemical and molecular biological analysis of different responses to 2,3,7,8-tetrachlorodibenzo-*p*-dioxin in chick embryo heart and liver. *Archives of Biochemistry and Biophysics*, 427, 58-67. doi:10.1016/j.abb.2004.04.021
- Karjalainen A, Paakkonen J-PJ and Karjalainen J, 2006. Tissue-specific and whole-fish accumulation of polychlorinated biphenyls by juvenile Baltic salmon (*Salmo salar* L.) after oral gavage exposure. *Boreal Environment Research*, 11, 421-430.
- Katynski AL, Vijayan MM, Kennedy SW and Moon TW, 2004. 3,3',4,4',5-Pentachlorobiphenyl (PCB 126) impacts hepatic lipid peroxidation, membrane fluidity and beta-adrenoceptor kinetics in chick

- embryos. *Comparative Biochemistry and Physiology C-Toxicology & Pharmacology*, 137, 81-93. doi:10.1016/j.cca.2003.11.004
- Kawakami T, Ishimura R, Nohara K, Takeda K, Tohyama C and Ohsako S, 2006. Differential susceptibilities of Holtzman and Sprague-Dawley rats to fetal death and placental dysfunction induced by 2, 3,7,8-tetrachlorodibenzo-*p*-dioxin (TCDD) despite the identical primary structure of the aryl hydrocarbon receptor. *Toxicology and Applied Pharmacology*, 212, 224-236.
- Kelly BC, Gray SL, Ikonomou MG, MacDonald JS, Bandiera SM and Hrycay EG, 2007. Lipid reserve dynamics and magnification of persistent organic pollutants in spawning sockeye salmon (*Oncorhynchus nerka*) from the Fraser River, British Columbia. *Environmental Science & Technology*, 41, 3083-3089. doi:10.1021/es061559n
- Kelly BC, Fernandez MP, Ikonomou MG and Knapp W, 2008. Persistent organic pollutants in aquafeed and Pacific salmon smolts from fish hatcheries in British Columbia, Canada. *Aquaculture*, 285, 224-233. doi:10.1016/j.aquaculture.2008.08.035
- Kelly BC, Ikonomou MG, MacPherson N, Sampson T, Patterson DA and Dubetz C, 2011. Tissue residue concentrations of organohalogen and trace elements in adult Pacific salmon returning to the Fraser River, British Columbia, Canada. *Environmental Toxicology and Chemistry*, 30, 367-376. doi:10.1002/etc.410
- Kerkvliet NI, Wagner SL, Schmotzer WB, Hackett M, Schrader WK and Hultgren B, 1992. Dioxin intoxication from chronic exposure of horses to pentachlorophenol-contaminated wood shavings. *JAVMA*, 2, 296-304.
- Kern PA, Said S, Jackson WG, Jr. and Michalek JE, 2004. Insulin sensitivity following agent orange exposure in Vietnam veterans with high blood levels of 2,3,7,8-tetrachlorodibenzo-*p*-dioxin. *J Clin Endocrinol Metab*, 89, 4665-4672. doi:10.1210/jc.2004-0250
- Ketchum NS, Michalek JE and Burton JE, 1999. Serum dioxin and cancer in veterans of Operation Ranch Hand. *Am J Epidemiol*, 149, 630-639.
- Ketchum NS and Michalek JE, 2005. Postservice mortality of Air Force veterans occupationally exposed to herbicides during the Vietnam War: 20-year follow-up results. *Mil Med*, 170, 406-413. doi:10.7205/MILMED.170.5.406
- Kim J, Gobas FAPC, Arnot JA, Powell DE, Seston RM and Woodburn KB, 2016. Evaluating the roles of biotransformation, spatial concentration differences, organism home range, and field sampling design on trophic magnification factors. *Science of the Total Environment*, 551, 438-451. doi:10.1016/j.scitotenv.2016.02.013
- Kimbrough RD, Coleman DC, Liddle JA, Cline RE and Phillips PE, 1977. Epidemiology and pathology of a tetrachlorodibenzodioxin poisoning episode. *Archives of Environmental Health: An International Journal*, 32:2, 77-86, doi: 10.1080/00039896.1977.10667259
- Kimura E, Kubo K, Matsuyoshi C, Benner S, Hosokawa M, Endo T, Ling W, Kohda M, Yokoyama K, Nakajima K, Kakeyama M and Tohyama C, 2015. Developmental origin of abnormal dendritic growth in the mouse brain induced by in utero disruption of aryl hydrocarbon receptor signaling. *Neurotoxicology and Teratology*, 52, 42-50.
- Kitamura K, Kikuchi Y, Watanabe S, Waechter G, Sakurai H and Takada T, 2000. Health Effects of Chronic Exposure to Polychlorinated Dibenzo-*P*-Dioxins (PCDD), Dibenzofurans (PCDF) and Coplanar PCB (Co-PCB) of Municipal Waste Incinerator Workers. *Journal of Epidemiology*, 10, 262-270. doi:10.2188/jea.10.262
- Kleeman JM, Olson JR, Chen SM and Peterson RE, 1986. Metabolism and disposition of 2,3,7,8-tetrachlorodibenzo-*p*-dioxin in rainbow trout. *Toxicol Appl Pharmacol*, 83, 391-401.
- Kleeman JM, Olson JR and Peterson RE, 1988. Species differences in 2,3,7,8-tetrachlorodibenzo-*p*-dioxin toxicity and biotransformation in fish. *Fundam Appl Toxicol*, 10, 206-213.
- Kobayashi J, Kinoshita K, Mizukawa K, Sakurai T, Imaizumi Y, Takada H and Suzuki N, 2011. Dietary uptake kinetics of polychlorinated biphenyls from sediment-contaminated sandworms in a marine

- benthic fish (*Pseudopleuronectes yokohamae*). *Chemosphere*, 82, 745-750. doi:10.1016/j.chemosphere.2010.10.087
- Kobayashi J, Sakurai T, Mizukawa K, Kinoshita K, Ito N, Hashimoto S, Nakajima D, Kawai T, Imaizumi Y, Takada H and Suzuki N, 2013. Respiratory uptake kinetics of neutral hydrophobic organic chemicals in a marine benthic fish, *Pseudopleuronectes yokohamae*. *Chemosphere*, 93, 1479-1486. doi:10.1016/j.chemosphere.2013.07.031
- Kobayashi J, Imuta Y, Komorita T, Yamada K, Ishibashi H, Ishihara F, Nakashima N, Sakai J, Arizono K and Koga M, 2015. Trophic magnification of polychlorinated biphenyls and polybrominated diphenyl ethers in an estuarine food web of the Ariake Sea, Japan. *Chemosphere*, 118, 201-206. doi:10.1016/j.chemosphere.2014.08.066
- Koch BT, Garvey JE, You J and Lydy MJ, 2006. Elevated organochlorines in the brain-hypothalamic-pituitary complex of intersexual shovelnose sturgeon. *Environ Toxicol Chem*, 25, 1689-1697.
- Konishi K, Sasaki S, Kato S, Ban S, Washino N, Kajiwara J, Todaka T, Hirakawa H, Hori T, Yasutake D and Kishi R, 2009. Prenatal exposure to PCDDs/PCDFs and dioxin-like PCBs in relation to birth weight. *Environmental Research*, 109, 906-913. doi:10.1016/j.envres.2009.07.010
- Kopec AK, Boverhof DR, Burgoon LD, Ibrahim-Aibo D, Harkema JR, Tashiro C, Chittim B and Zacharewski TR, 2008. Comparative toxicogenomic examination of the hepatic effects of PCB126 and TCDD in immature, ovariectomized C57BL/6 mice. *Toxicological Sciences*, 102, 61-75.
- Kopec AK, Burgoon LD, Ibrahim-Aibo D, Burg AR, Lee AW, Tashiro C, Potter D, Sharratt B, Harkema JR, Rowlands JC, Budinsky RA and Zacharewski TR, 2010. Automated Dose-Response Analysis and Comparative Toxicogenomic Evaluation of the Hepatic Effects Elicited by TCDD, TCDF, and PCB126 in C57BL/6 Mice. *Toxicological Sciences*, 118, 286-297.
- Kopec AK, D'Souza ML, Mets BD, Burgoon LD, Reese SE, Archer KJ, Potter D, Tashiro C, Sharratt B, Harkema JR and Zacharewski TR, 2011. Non-additive hepatic gene expression elicited by 2,3,7,8-tetrachlorodibenzo-*p*-dioxin (TCDD) and 2,2',4,4',5,5'-hexachlorobiphenyl (PCB153) co-treatment in C57BL/6 mice. *Toxicology and Applied Pharmacology*, 256, 154-167.
- Koponen K, Kukkonen JVK and Lindstrom-Seppa P, 1998. Chemical accumulation and biotransformation enzyme activities of rainbow trout embryos in waterborne exposure to PCB-77. *Marine Environmental Research*, 46, 475-478. doi:10.1016/s0141-1136(97)00064-0
- Koponen K, Lindstrom-Seppa P and Kukkonen JV, 2000. Accumulation pattern and biotransformation enzyme induction in rainbow trout embryos exposed to sublethal aqueous concentrations of 3,3',4,4'-tetrachlorobiphenyl. *Chemosphere*, 40, 245-253.
- Korenaga T, Fukusato T, Ohta M, Asaoka K, Murata N, Arima A and Kubota S, 2007. Long-term effects of subcutaneously injected 2,3,7,8-tetrachlorodibenzo-*p*-dioxin on the liver of rhesus monkeys. *Chemosphere*, 67, S399-S404.
- Korrick SA, Lee MM, Williams PL, Sergeev O, Burns JS, Patterson DG, Turner WE, Needham LL, Altshul L, Revich B and Hauser R, 2011. Dioxin Exposure and Age of Pubertal Onset among Russian Boys. *Environmental Health Perspectives*, 119, 1339-1344. doi:10.1289/ehp.1003102
- Koskenniemi JJ, Virtanen HE, Kiviranta H, Damgaard IN, Matomaki J, Thorup JM, Hurme T, Skakkebaek NE, Main KM and Toppari J, 2015. Association between levels of persistent organic pollutants in adipose tissue and cryptorchidism in early childhood: a case-control study. *Environmental Health*, 14, 78-78. doi:10.1186/s12940-015-0065-0
- Koslowski SE, Metcalfe CD, Lazar R and Haffner GD, 1994. The distribution of 42 PCBs, including 3 coplanar congeners, in the food-web of the western basin of Lake Erie. *Journal of Great Lakes Research*, 20, 260-270.
- Kransler KM, McGarrigle BP and Olson JR, 2007a. Comparative developmental toxicity of 2,3,7,8-tetrachlorodibenzo-*p*-dioxin in the hamster, rat and guinea pig. *Toxicology*, 229, 214-225.
- Kransler KM, Tonucci DA, McGarrigle BP, Napoli JL and Olson JR, 2007b. Gestational exposure to 2,3,7,8-tetrachlorodibenzo-*p*-dioxin alters retinoid homeostasis in maternal and perinatal tissues of the Holtzman rat. *Toxicology and Applied Pharmacology*, 224, 29-38.

- Kransler KM, McGarrigle BP, Russell RJ and Olson JR, 2008. Effects of Helicobacter infection on developmental toxicity of 2,3,7,8-tetrachlorodibenzo-*p*-dioxin in Holtzman rats. *Lab Animal*, 37, 171-175.
- Kransler KM, McGarrigle BP, Swartz DD and Olson JR, 2009. Lung Development in the Holtzman Rat is Adversely Affected by Gestational Exposure to 2,3,7,8-Tetrachlorodibenzo-*p*-Dioxin. *Toxicological Sciences*, 107, 498-511.
- Krogenaes AK, Ropstad E, Gutleb AC, Hardnes N, Berg V, Dahl E and Fowler PA, 2014. In Utero Exposure to Environmentally Relevant Concentrations of PCB 153 and PCB 118 Disrupts Fetal Testis Development in Sheep. *Journal of Toxicology and Environmental Health-Part a-Current Issues*, 77, 628-649. doi:10.1080/15287394.2014.887426
- Kuehl DW, Cook PM, Batterman AR, Lothenbach DB, Butterworth BC and Johnson DL, 1985. Bioavailability of 2,3,7,8-tetrachlorodibenzo-*p*-dioxin from municipal incinerator fly-ash to fresh-water fish. *Chemosphere*, 14, 427-437. doi:10.1016/0045-6535(85)90237-1
- Kuehl DW, Cook PM, Batterman AR, Lothenbach D and Butterworth BC, 1987a. Bioavailability of polychlorinated dibenzo-*p*-dioxins and dibenzofurans from contaminated Wisconsin river sediment to carp. *Chemosphere*, 16, 667-679. doi:10.1016/0045-6535(87)90003-8
- Kuehl DW, Cook PM, Batterman AR and Butterworth BC, 1987b. Isomer dependent bioavailability of polychlorinated dibenzo-*p*-dioxins and dibenzofurans from municipal incinerator fly-ash to carp. *Chemosphere*, 16, 657-666. doi:10.1016/0045-6535(87)90002-6
- Laender FD, Oevelen DV, Frantzen S, Middelburg JJ and Soetaert K, 2010. Seasonal PCB bioaccumulation in an arctic marine ecosystem: a model analysis incorporating lipid dynamics, food-web productivity and migration. *Environ Sci Technol*, 44, 356-361. doi:10.1021/es902625u
- Landgren O, Shim YK, Michalek J, Costello R, Burton D, Ketchum N, Calvo KR, Caporaso N, Raveche E, Middleton D, Marti G and Vogt RF, Jr., 2015. Agent Orange Exposure and Monoclonal Gammopathy of Undetermined Significance: An Operation Ranch Hand Veteran Cohort Study. *JAMA Oncol*, 1, 1061-1068. doi:10.1001/jamaoncol.2015.2938
- Lanting CI, Patandin S, Fidler V, Weisglas-Kuperus N, Sauer PJJ, Boersma ER and Touwen BCL, 1998. Neurological condition in 42-month-old children in relation to pre- and postnatal exposure to polychlorinated biphenyls and dioxins. *Early Human Development*, 50, 283-292. doi:10.1016/S0378-3782(97)00066-2
- Lauriano ER, Calo M, Silvestri G, Zaccone D, Pergolizzi S and Lo Cascio P, 2012. Mast cells in the intestine and gills of the sea bream, *Sparus aurata*, exposed to a polychlorinated biphenyl, PCB 126. *Acta Histochem*, 114, 166-171. doi:10.1016/j.acthis.2011.04.004
- Lavoie ET, Wiley F, Grasman KA, Tillitt DE, Sikarskie JG and Bowerman WW, 2007. Effect of *In Ovo* exposure to an organochlorine mixture extracted from double crested cormorant eggs (*Phalacrocorax auritus*) and PCB 126 on immune function of juvenile chickens. *Arch Environ Contam Toxicol*, 53, 655-661. doi:10.1007/s00244-006-0150-z
- Lavrusenko GP, Zheltov VA, Ponomarev VN, Lavrov AL, Volkov VN, Yerokhina LM, Malogolovkin SA, Novikov BV, Dmitrenko VV and Shadymova NG, 1996. Effect of dioxine on the immune system of farm animals. *Russian Agricultural Sciences*, 8-14.
- Lawson CC, Schnorr TM, Whelan EA, Deddens JA, Dankovic DA, Piacitelli LA, Sweeney MH and Connally LB, 2004. Paternal occupational exposure to 2,3,7,8-tetrachlorodibenzo-*p*-dioxin and birth outcomes of offspring: birth weight, preterm delivery, and birth defects. *Environmental Health Perspectives*, 112, 1403-1408. doi:10.1289/ehp.7051
- Lebas C and Renouf B, 2009. Raw materials utilization and feeding techniques: new contributions in the 9th World Rabbit Congress. *Journée d'étude de ASFC*, 5 February 2009, Vêrone - Ombres & Lumières, 30-36.
- Leeson S and Summers JD, 2008. *Commercial Poultry Nutrition*, 3rd Edition. Nottingham University Press, Guelph, Ontario, Canada. 412 pp.



- Leijds MM, Koppe JG, Olie K, van Aalderen WM, Voogt P, Vulsma T, Westra M and ten Tusscher GW, 2008. Delayed initiation of breast development in girls with higher prenatal dioxin exposure; a longitudinal cohort study. *Chemosphere*, 73, 999-1004. doi:10.1016/j.chemosphere.2008.05.053
- Leijds MM, Koppe JG, Olie K, van Aalderen WMC, de Voogt P and ten Tusscher GW, 2009. Effects of Dioxins, PCBs, and PBDEs on Immunology and Hematology in Adolescents. *Environmental science & technology*, 43, 7946-7951. doi:10.1021/es901480f
- Leijds MM, ten Tusscher GW, Olie K, van Teunenbroek T, van Aalderen WM, de Voogt P, Vulsma T, Bartonova A, Kraymer von Krauss M, Mosoiu C, Riojas-Rodriguez H, Calamandrei G and Koppe JG, 2012. Thyroid hormone metabolism and environmental chemical exposure. *Environ Health*, 11 Suppl 1, S10. doi:10.1186/1476-069x-11-s1-s10
- Leijds MM, Koppe JG, Vulsma T, Olie K, van Aalderen WMC, de Voogt P, Legler J and ten Tusscher GW, 2017. Alterations in the programming of energy metabolism in adolescents with background exposure to dioxins, DL-PCBs and PBDEs. *Plos One*, 12. doi:10.1371/journal.pone.0184006
- Li B, Liu HY, Dai LJ, Lu JC, Yang ZM and Huang L, 2006. The early embryo loss caused by 2,3,7,8-tetrachlorodibenzo-*p*-dioxin may be related to the accumulation of this compound in the uterus. *Reproductive Toxicology*, 21, 301-306. doi:10.1016/j.reprotox.2005.09.008
- Li Q, Lan L, Klaassen Z, Shah SR, Moses KA and Terris MK, 2013. High level of dioxin-TEQ in tissue is associated with Agent Orange exposure but not with biochemical recurrence after radical prostatectomy. *Prostate Cancer Prostatic Dis*, 16, 376-381. doi:10.1038/pcan.2013.33
- Lim J, DeWitt JC, Sanders RA, Watkins JB, 3rd and Henshel DS, 2007. Suppression of endogenous antioxidant enzymes by 2,3,7,8-tetrachlorodibenzo-*p*-dioxin-induced oxidative stress in chicken liver during development. *Arch Environ Contam Toxicol*, 52, 590-595. doi:10.1007/s00244-006-0168-2
- Lim J, Sanders RA, Yeager RL, Millsap DS, Watkins JB, III, Eells JT and Henshel DS, 2008. Attenuation of TCDD-induced oxidative stress by 670 nm photobiomodulation in developmental chicken kidney. *J Biochem Mol Toxicol*, 22, 230-239. doi:10.1002/jbt.20233
- Lin C, Hsu JF and Liao PC, 2012a. Coexposure of dioxin-like polychlorinated biphenyls and polychlorinated dibenzo-*p*-dioxins and dibenzofurans in free-range hens and implications derived from congener profile analysis. *J Agric Food Chem*, 60, 1963-1972. doi:10.1021/jf204468s
- Lin YS, Caffrey JL, Hsu PC, Chang MH, Faramawi MF and Lin JW, 2012b. Environmental exposure to dioxin-like compounds and the mortality risk in the U.S. population. *Int J Hyg Environ Health*, 215, 541-546. doi:10.1016/j.ijheh.2012.02.006
- Lind PM, Gustafsson M, Hermsen SA, Larsson S, Kyle CE, Orberg J and Rhind SM, 2009. Exposure to pastures fertilised with sewage sludge disrupts bone tissue homeostasis in sheep. *Sci Total Environ*, 407, 2200-2208. doi:10.1016/j.scitotenv.2008.12.035
- Lipsitz L, Powell D, Bursian S and Tanaka D, 1997. Assessment of cerebral hemispheric symmetry in hatchling chickens exposed *in ovo* to polychlorinated biphenyl congeners. *Archives of Environmental Contamination and Toxicology*, 32, 399-406.
- Liu J, Haffner GD and Drouillard KG, 2010. The influence of diet on the assimilation efficiency of 47 polychlorinated biphenyl congeners in Japanese koi (*Cyprinus carpio*). *Environmental Toxicology and Chemistry*, 29, 401-409. doi:10.1002/etc.47
- Lloyd OL, Lloyd MM, Williams FLR, McKenzie A and Hay A, 1991. Toxicity from Ragwort and fat cow syndrome, or from industrial chemicals – The value of epidemiologic analysis for interpreting clinicopathological findings. *Science of the Total Environment*, 106, 83-96. doi:10.1016/0048-9697(91)90022-7
- Lock EJ, Fjellidal PG, Torstensen BE, Bjornevik M, Breck O, Johansen J, Reynolds P, Sigholt T, Joerum N, Jakobsen JV, Ruohonen K, Waagbo R and Berntssen MHG, 2011. Dietary decontaminated fish oil has no negative impact on fish performance, flesh quality or production-related diseases in Atlantic salmon (*Salmo salar*). *Aquaculture Nutrition*, 17, e760-e772.

- Loizeau V, Abarnou A and Menesguen A, 2001. A steady-state model of PCB bioaccumulation in the sea bass (*Dicentrarchus labrax*) food web from the Seine estuary, France. *Estuaries*, 24, 1074-1087. doi:10.2307/1353019
- Longnecker MP and Michalek JE, 2000. Serum dioxin level in relation to diabetes mellitus among Air Force veterans with background levels of exposure. *Epidemiology*, 11, 44-48. doi:10.1097/00001648-200001000-00010
- Loonen H, Tonkes M, Parsons JR and Govers HAJ, 1994. Bioconcentration of polychlorinated dibenzo-*p*-dioxins and polychlorinated dibenzofurans in guppies after aqueous exposure to a complex pcdd pcdf mixture - relationship with molecular-structure. *Aquatic Toxicology*, 30, 153-169
- Lundberg R, Lyche JL, Ropstad E, Aleksandersen M, Ronn M, Skaare JU, Larsson S, Orberg J and Lind PM, 2006. Perinatal exposure to PCB 153, but not PCB 126, alters bone tissue composition in female goat offspring. *Toxicology*, 228, 33-40. doi:10.1016/j.tox.2006.08.016
- Lundebye AK, Berntssen MHG, Lie O, Ritchie G, Isosaari P, Kiviranta H and Vartiainen T, 2004. Dietary uptake of dioxins (PCDD/PCDFs) and dioxin-like PCBs in Atlantic salmon (*Salmo salar*). *Aquaculture Nutrition*, 10, 199-207. doi:10.1111/j.1365-2095.2004.00299.x
- Lyche JL, Skaare JU, Larsen HJ and Ropstad E, 2004a. Levels of PCB 126 and PCB 153 in plasma and tissues in goats exposed during gestation and lactation. *Chemosphere*, 55, 621-629. doi:10.1016/j.chemosphere.2003.11.024
- Lyche JL, Larsen HJS, Skaare JU, Tverdal A, Dahl E, Johansen GM and Ropstad E, 2004b. Effects of perinatal exposure to low doses of PCB 153 and PCB 126 on lymphocyte proliferation and hematology in goat kids. *Journal of Toxicology and Environmental Health-Part a-Current Issues*, 67, 889-904. doi:10.1080/15287390490443740
- Lyche JL, Oskam IC, Skaare JU, Reksen O, Sweeney T, Dahl E, Farstad W and Ropstad E, 2004c. Effects of gestational and lactational exposure to low doses of PCBs 126 and 153 on anterior pituitary and gonadal hormones and on puberty in female goats. *Reproductive Toxicology*, 19, 87-95. doi:10.1016/j.reprotox.2004.05.005
- Lyche JL, Larsen HJ, Skaare JU, Tverdal A, Johansen GM and Ropstad E, 2006. Perinatal exposure to low doses of PCB 153 and PCB 126 affects maternal and neonatal immunity in goat kids. *J Toxicol Environ Health A*, 69, 139-158. doi:10.1080/15287390500259418
- Mac MJ and Edsall CC, 1991. Environmental contaminants and the reproductive success of lake trout in the Great Lakes: an epidemiological approach. *J Toxicol Environ Health*, 33, 375-394. doi:10.1080/15287399109531536
- Madenjian CP, Schmidt LJ, Chernyak SM, Elliott RF, Desorcie TJ, Quintal RT, Begnoche LJ and Hesselberg RJ, 1999. Variation in net trophic transfer efficiencies among 21 PCB congeners. *Environmental Science & Technology*, 33, 3768-3773. doi:10.1021/es9903882
- Madenjian CP, O'Connor DV, Rediske RR, O'Keefe JP and Pothoven SA, 2008. Net trophic transfer efficiencies of polychlorinated biphenyl congeners to lake whitefish (*Coregonus clupeaformis*) from their food. *Environmental Toxicology and Chemistry*, 27, 631-636. doi:10.1897/07-274.1
- Madenjian CP, David SR, Rediske RR and O'Keefe JP, 2012. Net trophic transfer efficiencies of polychlorinated biphenyl congeners to lake trout (*Salvelinus namaycush*) from its prey. *Environmental Toxicology and Chemistry*, 31, 2821-2827. doi:10.1002/etc.1996
- Madenjian CP, Rediske RR, O'Keefe JP and David SR, 2014. Laboratory estimation of net trophic transfer efficiencies of PCB Congeners to lake trout (*Salvelinus namaycush*) from its prey. *J Vis Exp*. doi:10.3791/51496
- Maervoet J, Chu SG, De Vos S, Covaci A, Voorspoels S, De Schrijver R and Schepens P, 2004. Accumulation and tissue distribution of selected polychlorinated biphenyl congeners in chickens. *Chemosphere*, 57, 61-66. doi:10.1016/j.chemosphere.2004.06.015
- Maervoet J, Beck V, Roelens SA, Covaci A, Voorspoels S, Geuns JMC, Darras VM and Schepens P, 2005. Uptake and tissue-specific distribution of selected polychlorinated biphenyls in developing chicken embryos. *Environmental Toxicology and Chemistry*, 24, 597-602. doi:10.1897/04-266r.1

- Maervoet J, Vermeir G, Covaci A, Van Larebeke N, Koppen G, Schoeters G, Nelen V, Baeyens W, Schepens P and Viaene MK, 2007. Association of thyroid hormone concentrations with levels of organochlorine compounds in cord blood of neonates. *Environmental Health Perspectives*, 115, 1780-1786. doi:10.1289/ehp.10486
- Maier D, Blaha L, Giesy JP, Henneberg A, Kohler HR, Kuch B, Osterauer R, Peschke K, Richter D, Scheurer M and Triebkorn R, 2015. Biological plausibility as a tool to associate analytical data for micropollutants and effect potentials in wastewater, surface water, and sediments with effects in fishes. *Water Res*, 72, 127-144. doi:10.1016/j.watres.2014.08.050
- Maisano M, Cappello T, Oliva S, Natalotto A, Giannetto A, Parrino V, Battaglia P, Romeo T, Salvo A, Spano N and Mauceri A, 2016. PCB and OCP accumulation and evidence of hepatic alteration in the Atlantic bluefin tuna, *T. thynnus*, from the Mediterranean Sea. *Mar Environ Res*. doi:10.1016/j.marenvres.2016.03.003
- Malisch R, 2000. Increase of the PCDD/F-contamination of milk, butter and meat samples by use of contaminated citrus pulp. *Chemosphere*, 40, 1041-1053. doi:10.1016/s0045-6535(99)00352-5
- Manuwald U, Velasco Garrido M, Berger J, Manz A and Baur X, 2012. Mortality study of chemical workers exposed to dioxins: follow-up 23 years after chemical plant closure. *Occup Environ Med*, 69, 636-642. doi:10.1136/oemed-2012-100682
- Martin PA, Mayne GJ, Bursian S, Palace V and Kannan K, 2006. Changes in thyroid and vitamin A status in mink fed polyhalogenated-aromatic-hydrocarbon-contaminated carp from the Saginaw River, Michigan, USA. *Environmental Research*, 101, 53-67.
- Martínez-Zamora MA, Mattioli L, Parera J, Abad E, Coloma JL, van Babel B, Galceran MT, Balasch J and Carmona F, 2015. Increased levels of dioxin-like substances in adipose tissue in patients with deep infiltrating endometriosis. *Human Reproduction*, 30, 1059-1068. doi:10.1093/humrep/dev026
- Martyniuk CJ, Sanchez BC, Szabo NJ, Denslow ND and Sepulveda MS, 2009. Aquatic contaminants alter genes involved in neurotransmitter synthesis and gonadotropin release in largemouth bass. *Aquat Toxicol*, 95, 1-9. doi:10.1016/j.aquatox.2009.06.009
- Matsuura N, Uchiyama T, Tada H, Nakamura Y, Kondo N, Morita M and Fukushima M, 2001. Effects of dioxins and polychlorinated biphenyls (PCBs) on thyroid function in infants born in Japan - the second report from research on environmental health. *Chemosphere*, 45, 1167-1171. doi:10.1016/S0045-6535(01)00050-9
- McBride DI, Collins JJ, Humphry NF, Herbison P, Bodner KM, Aylward LL, Burns CJ and Wilken M, 2009. Mortality in workers exposed to 2,3,7,8-tetrachlorodibenzo-*p*-dioxin at a trichlorophenol plant in New Zealand. *J Occup Environ Med*, 51, 1049-1056. doi:10.1097/JOM.0b013e3181b571ae
- McDonald P, Greenhalgh JFD, Morgan CA, Edwards R, Sinclair L and Wilkinson R, 2011. *Animal Nutrition*. 7th Edition, Benjamin Cummings. 692 pp.
- McKernan MA, Rattner BA, Hale RC and Ottinger MA, 2007. Egg incubation position affects toxicity of air cell administered polychlorinated biphenyl 126 (3,3',4,4',5-pentachlorobiphenyl) in chicken (*Gallus gallus*) embryos. *Environ Toxicol Chem*, 26, 2724-2727. doi:10.1897/07-291.1
- McKinney JD, Chae K, Gupta BN, Moore JA and Goldstein HA, 1976. Toxicological assessment of hexachlorobiphenyl isomers and 2,3,7,8 tetrachlorodibenzofuran in chicks. I. Relationship of chemical parameters. *Toxicol Appl Pharmacol*, 36, 65-80.
- McLeod A, Leadley TA, Drouillard KG and Haffner GD, 2014. Effect of Season and Habitat on PCB Bioaccumulation by Caged Bluegill Sunfish Deployed in a Great Lakes Area of Concern. *Bulletin of Environmental Contamination and Toxicology*, 93, 1-6. doi:10.1007/s00128-014-1280-z
- McLeod AM, Paterson G, Drouillard KG and Haffner GD, 2015. PCB Food Web Dynamics Quantify Nutrient and Energy Flow in Aquatic Ecosystems. *Environmental Science and Technology*, 49, 12832-12839. doi:10.1021/acs.est.5b03978
- McMurry CS and Dickerson RL, 2001. Effects of binary mixtures of six xenobiotics on hormone concentrations and morphometric endpoints of northern bobwhite quail (*Colinus virginianus*). *Chemosphere*, 43, 829-837. doi:10.1016/s0045-6535(00)00441-0



- McNabb FMA, McCleary RJR, Fowler LA, Parsons CM, Grasman KA and Fox GA, 2001. Thyroid function in PCB-Exposed avian embryos and chicks. Eds Goos HJT, Rastogi RK, Vaudry H and Pierantoni R. Monduzzi Editore, Bologna, Italy, 275-280 pp.
- Mehrle PM, Buckler DR, Little EE, Smith LM, Petty JD, Peterman PH, Stalling DL, Degraeve GM, Coyle JJ and Adams WJ, 1988. Toxicity and bioconcentration of 2,3,7,8-tetrachlorodibenzodioxin and 2,3,7,8-tetrachlorodibenzofuran in rainbow-trout. *Environmental Toxicology and Chemistry*, 7, 47-62. doi:10.1897/1552-8618(1988)7[47:tabota]2.0.co;2
- Mehrtens G and Laturnus F, 1999. Mixed function oxidase dependent biotransformation of polychlorinated biphenyls by different species of fish from the North Sea. *Chemosphere*, 38, 2995-3002. doi:10.1016/s0045-6535(98)00501-3
- Menotta S, D'Antonio M, Diegoli G, Montella L, Raccanelli S and Fedrizzi G, 2010. Depletion study of PCDD/Fs and dioxin-like PCBs concentrations in contaminated home-produced eggs: Preliminary study. *Analytica Chimica Acta*, 672, 50-54. doi:10.1016/j.aca.2010.04.043
- Merten C, Ferrari P, Bakker M, Boss A, Hearty A, Leclercq C, Lindtner O, Tlustos C, Verger P, Volatier JL and Arcella D, 2011. Methodological characteristics of the national dietary surveys carried out in the European Union as included in the European Food Safety Authority (EFSA) Comprehensive European Food Consumption Database, Food Additives and Contaminants. Part A, 28, 975-995.
- Metcalfe LD, 1972. Proposed source of chick edema factor. *J Assoc Off Anal Chem*, 55, 542-546.
- Metcalfe TL and Metcalfe CD, 1997. The trophodynamics of PCBs, including mono- and non-ortho congeners, in the food web of North-Central Lake Ontario. *Science of the Total Environment*, 201, 245-272. doi:10.1016/s0048-9697(97)84061-2
- Michalek JE, Rahe AJ and Boyle CA, 1998. Paternal dioxin, preterm birth, intrauterine growth retardation, and infant death. *Epidemiology*, 9, 161-167. doi:10.1097/00001648-199803000-00010
- Michalek JE, Akhtar FZ and Kiel JL, 1999a. Serum dioxin, insulin, fasting glucose, and sex hormone-binding globulin in veterans of operation ranch hand. *Journal of Clinical Endocrinology & Metabolism*, 84, 1540-1543. doi:10.1210/jc.84.5.1540
- Michalek JE, Ketchum NS and Check IJ, 1999b. Serum dioxin and immunologic response in veterans of Operation Ranch Hand. *Am J Epidemiol*, 149, 1038-1046.
- Michalek JE, Ketchum NS and Longnecker MP, 2001a. Serum dioxin and hepatic abnormalities in veterans of Operation Ranch Hand. *Ann Epidemiol*, 11, 304-311. doi:10.1016/S1047-2797(00)00218-0
- Michalek JE, Akhtar FZ, Arezzo JC, Garabrant DH and Albers JW, 2001b. Serum dioxin and peripheral neuropathy in veterans of Operation Ranch Hand. *Neurotoxicology*, 22, 479-490. doi:10.1016/S0161-813X(01)00052-3
- Michalek JE, Barrett DH, Morris RD and Jackson WG, Jr., 2003. Serum dioxin and psychological functioning in U.S. Air Force veterans of the Vietnam War. *Mil Med*, 168, 153-159.
- Michalek JE and Pavuk M, 2008. Diabetes and cancer in veterans of Operation Ranch Hand after adjustment for calendar period, days of spraying, and time spent in Southeast Asia. *J Occup Environ Med*, 50, 330-340. doi:10.1097/JOM.0b013e31815f889b
- Miller RA, Norris LA and Loper BR, 1979. Response of Coho salmon and guppies to 2,3,7,8-tetrachlorodibenzo-para-dioxin (TCDD) in water. *Transactions of the American Fisheries Society*, 108, 401-407. doi:10.1577/1548-8659(1979)108<401:trocса>2.0.co;2
- Mínguez-Alarcón L, Sergeev O, Burns JS, Williams PL, Lee MM, Korrick SA, Smigulina L, Revich B and Hauser R, 2017. A Longitudinal Study of Peripubertal Serum Organochlorine Concentrations and Semen Parameters in Young Men: The Russian Children's Study. *Environmental Health Perspectives*, 125, 460-466. doi:10.1289/EHP25
- Miranda CL, Henderson MC, Wang JL, Nakaue HS and Buhler DR, 1987. Effects of polychlorinated biphenyls on porphyrin synthesis and cytochrome P-450-dependent monooxygenases in small

- intestine and liver of Japanese quail. *J Toxicol Environ Health*, 20, 27-35. doi:10.1080/15287398709530959
- Miranda CL, Henderson MC, Wang JL, Chang HS, Hendricks JD and Buhler DR, 1992. Differential effects of 3,4,5,3',4',5'-hexachlorobiphenyl (HCB) on interrenal steroidogenesis in male and female rainbow trout *Oncorhynchus mykiss*. *Comp Biochem Physiol C*, 103, 153-157.
- Miyashita C, Sasaki S, Saijo Y, Washino N, Okada E, Kobayashi S, Konishi K, Kajiwara J, Todaka T and Kishi R, 2011. Effects of prenatal exposure to dioxin-like compounds on allergies and infections during infancy. *Environmental Research*, 111, 551-558. doi:10.1016/j.envres.2011.01.021
- Mocarelli P, Gerthoux PM, Ferrari E, Patterson DG, Kieszak SM, Brambilla P, Vincoli N, Signorini S, Tramacere P, Carreri V, Sampson EJ, Turner WE and Needham LL, 2000. Paternal concentrations of dioxin and sex ratio of offspring. *Lancet*, 355, 1858-1863. doi:10.1016/S0140-6736(00)02290-X
- Mocarelli P, Gerthoux PM, Patterson DG, Milani S, Limonta G, Bertona M, Signorini S, Tramacere P, Colombo L, Crespi C, Brambilla P, Sarto C, Carreri V, Sampson EJ, Turner WE and Needham LL, 2008. Dioxin exposure, from infancy through puberty, produces endocrine disruption and affects human semen quality. *Environmental Health Perspectives*, 116, 70-77. doi:10.1289/ehp.10399
- Mocarelli P, Gerthoux PM, Needham LL, Patterson DG, Limonta G, Falbo R, Signorini S, Bertona M, Crespi C, Sarto C, Scott PK, Turner WE and Brambilla P, 2011. Perinatal Exposure to Low Doses of Dioxin Can Permanently Impair Human Semen Quality. *Environmental Health Perspectives*, 119, 713-718. doi:10.1289/ehp.1002134
- Moermond CTA, Roozen F, Zwolsman JJG and Koelmans AA, 2004. Uptake of sediment-bound bioavailable polychlorobiphenyls by benthivorous carp (*Cyprinus carpio*). *Environmental Science & Technology*, 38, 4503-4509. doi:10.1021/es040029t
- Moher D, Liberati A, Tetzlaff J, Altman DG, The PRISMA Group, 2009. Preferred reporting items for systematic reviews and meta-analyses: the PRISMA statement. *PLoS Med* 6(7) e1000097. doi:10.1371/journal.pmed.1000097
- Moore JN, Newsted JL, Hecker M, Zwiernik MJ, Fitzgerald SD, Kay DP, Zhang XW, Higley EB, Aylward LL, Beckett KJ, Budinsky RA, Bursian SJ and Giesy JP, 2009. Hepatic P450 Enzyme Activity, Tissue Morphology and Histology of Mink (*Mustela vison*) Exposed to Polychlorinated Dibenzofurans. *Archives of Environmental Contamination and Toxicology*, 57, 416-425.
- Moore JN, Zwiernik MJ, Newsted JL, Fitzgerald SD, Link JE, Bradley PW, Kay D, Budinsky R, Giesy JP and Bursian SJ, 2012. Effects of dietary exposure of mink (*Mustela vison*) to 2,3,7,8-tetrachlorodibenzo-*p*-dioxin, 2,3,4,7,8-pentachlorodibenzofuran, and 2,3,7,8-tetrachlorodibenzofuran on reproduction and offspring viability and growth. *Environmental Toxicology and Chemistry*, 31, 360-369.
- Morris DL, Jeong HG, Jordan SD, Kaminski NE and Holsapple MP, 1998. Characterization of the effects of 2,3,7,8-tetrachlorodibenzo-*p*-dioxin in B6C3F1 and DBA/2 mice following single and repeated exposures. *Archives of Toxicology*, 72, 157-168.
- Muto T, Imano N, Nakaaki K, Takahashi H, Hano H, Wakui S and Furusato M, 2003. Estrous cyclicity and ovarian follicles in female rats after prenatal exposure to 3,3',4,4',5-pentachlorobiphenyl. *Toxicology Letters*;143 (3): 271-277 AUG 28 2003, 143, 271-277
- Nacher-Mestre J, Serrano R, Benedito-Palos L, Navarro JC, Lopez FJ and Perez-Sanchez J, 2009. Effects of fish oil replacement and re-feeding on the bioaccumulation of organochlorine compounds in gilthead sea bream (*Sparus aurata* L.) of market size. *Chemosphere*, 76, 811-817. doi:10.1016/j.chemosphere.2009.04.046
- Nagayama J, Okamura K, Iida T, Hirakawa H, Matsueda T, Tsuji H, Hasegawa M, Sato K, Ma HY, Yanagawa T, Igarashi H, Fukushima J and Watanabe T, 1998. Postnatal exposure to chlorinated dioxins and related chemicals on thyroid hormone status in Japanese breast-fed infants. *Chemosphere*, 37, 1789-1793.

- Nagayama J, Tsuji H, Iida T, Hirakawa H, Matsueda T and Ohki M, 2001. Effects of contamination level of dioxins and related chemicals on thyroid hormone and immune response systems in patients with "Yusho". *Chemosphere*, 43, 1005-1010.
- Nagayama J, Kohno H, Kunisue T, Kataoka K, Shimomura H, Tanabe S and Konishi S, 2007a. Concentrations of organochlorine pollutants in mothers who gave birth to neonates with congenital hypothyroidism. *Chemosphere*, 68, 972-976. doi:10.1016/j.chemosphere.2007.01.010
- Nagayama J, Tsuji H, Iida T, Nakagawa R, Matsueda T, Hirakawa H, Yanagawa T, Fukushima J and Watanabe T, 2007b. Immunologic effects of perinatal exposure to dioxins, PCBs and organochlorine pesticides in Japanese infants. *Chemosphere*, 67, S393-398. doi:10.1016/j.chemosphere.2006.05.134
- Nakajima S, Saijo Y, Kato S, Sasaki S, Uno K, Kanagami N, Hirakawa H, Hori T, Tobiishi K, Todaka T, Nakamura Y, Yanagiya S, Sengoku Y, Iida T, Sata F and Kishi R, 2006. Effects of prenatal exposure to polychlorinated biphenyls and dioxins on mental and motor development in Japanese children at 6 months of age. *Environmental Health Perspectives*, 114, 773-778. doi:10.1289/ehp.8614
- Nakajima S, Saijo Y, Miyashita C, Ikeno T, Sasaki S, Kajiwara J and Kishi R, 2017. Sex-specific differences in effect of prenatal exposure to dioxin-like compounds on neurodevelopment in Japanese children: Sapporo cohort study. *Environ Res*, 159, 222-231. doi:10.1016/j.envres.2017.08.006
- Nakamoto M, Arisawa K, Uemura H, Katsuura S, Takami H, Sawachika F, Yamaguchi M, Juta T, Sakai T, Toda E, Mori K, Hasegawa M, Tanto M, Shima M, Sumiyoshi Y, Morinaga K, Kodama K, Suzuki T, Nagai M and Satoh H, 2013. Association between blood levels of PCDDs/PCDFs/dioxin-like PCBs and history of allergic and other diseases in the Japanese population. *International archives of occupational and environmental health*, 86, 849-859. doi:10.1007/s00420-012-0819-8
- Nault R, Al-Hameedi S and Moon TW, 2012. Effects of polychlorinated biphenyls on whole animal energy mobilization and hepatic cellular respiration in rainbow trout, *Oncorhynchus mykiss*. *Chemosphere*, 87, 1057-1062. doi:10.1016/j.chemosphere.2012.02.012
- Nault R, Fader KA, Ammendolia DA, Dornbos P, Potter D, Sharratt B, Kumagai K, Harkema JR, Lunt SY, Matthews J and Zacharewski T, 2016. Dose-Dependent Metabolic Reprogramming and Differential Gene Expression in TCDD-Elicited Hepatic Fibrosis. *Toxicological Sciences*, 154, 253-266. doi:10.1093/toxsci/kfw163
- Navas JM, Merino R, Jimenez B, Rivera J, Abad E, Zanuy S and Carrillo M, 2005. Organochlorine compounds in liver and concentrations of vitellogenin and 17 beta-estradiol in plasma of sea bass fed with a commercial or with a natural diet. *Aquatic Toxicology*, 75, 306-315. doi:10.1016/j.aquatox.2005.07.014
- Ndayibagira A, Cloutier MJ, Anderson PD and Spear PA, 1995. Effects of 3,3',4,4'-tetrachlorobiphenyl on the dynamics of vitamin A in brook trout (*Salvelinus fontinalis*) and intestinal retinoid in lake sturgeon (*Acipenser Fulvescens*). *Canadian Journal of Fisheries and Aquatic Sciences*, 52, 512-520. doi:10.1139/f95-052
- Negishi T, Shimomura H, Koyama T, Kawasaki K, Ishii Y, Kyuwa S, Yasuda M, Kuroda Y and Yoshikawa Y, 2006. Gestational and lactational exposure to 2,3,7,8-tetrachlorodibenzo-*p*-dioxin affects social behaviors between developing rhesus monkeys (*Macaca mulatta*). *Toxicology Letters*, 160, 233-244.
- Neuberger M, Rappe C, Bergek S, Cai H, Hansson M, Jager R, Kundi M, Lim CK, Wingfors H and Smith AG, 1999. Persistent health effects of dioxin contamination in herbicide production. *Environ Res*, 81, 206-214. doi:10.1006/enrs.1999.3983
- Neugebauer J, Wittsiepe J, Kasper-Sonnenberg M, Schoneck N, Scholmerich A and Wilhelm M, 2015. The influence of low level pre- and perinatal exposure to PCDD/Fs, PCBs, and lead on attention performance and attention-related behavior among German school-aged children: results from the Duisburg Birth Cohort Study. *Int J Hyg Environ Health*, 218, 153-162. doi:10.1016/j.ijheh.2014.09.005

- Newsome WH, Iverson F, Ryan JJ, Lau PY and McLeod HA, 1984. Chlorinated compounds in tissues of chickens raised on pentachlorophenol-contaminated litter. *Food Additives and Contaminants*, 1, 3-10.
- Nguyen Van T, Nguyen Xuan H, Nguyen Thi M, Nguyen Manh T, Pham Quang H, Hoang Van B, Vu Duc N, Nguyen Van T, Le Ke S and Nguyen Hung M, 2015. Transport and bioaccumulation of polychlorinated dibenzo-*p*-dioxins and dibenzofurans at the Bien Hoa Agent Orange hotspot in Vietnam. *Environmental Science and Pollution Research*, 22, 14431-14441. doi:10.1007/s11356-014-3946-9
- Nigro M, Frenzilli G, Scarcelli V, Gorbi S and Regoli F, 2002. Induction of DNA strand breakage and apoptosis in the eel *Anguilla anguilla*. *Marine Environmental Research*, 54, 517-520. doi:10.1016/s0141-1136(02)00178-2
- Niimi AJ and Oliver BG, 1983. Biological half-lives of polychlorinated biphenyl (PCB) congeners in whole fish and muscle of rainbow-trout (*Salmo gairdneri*). *Canadian Journal of Fisheries and Aquatic Sciences*, 40, 1388-1394. doi:10.1139/f83-160
- Niimi AJ and Oliver BG, 1986. Biological half-lives of chlorinated dibenzo-para-dioxins and dibenzofurans in rainbow-trout (*Salmo gairdneri*). *Environmental Toxicology and Chemistry*, 5, 49-53. doi:10.1897/1552-8618(1986)5[49:bhocda]2.0.co;2
- Nikolaidis E, Brunstrom B and Dencker L, 1988. Effects of TCDD and its congeners 3,3',4,4'-tetrachloroazoxybenzene and 3,3',4,4'-tetrachlorobiphenyl on lymphoid development in the thymus of avian embryos. *Pharmacol Toxicol*, 63, 333-336.
- Nilsson T, Hakkinen J, Larsson P and Bjorklund E, 2006. Selective supercritical fluid extraction to identify aged sediment-bound PCBs available for uptake by eel. *Environmental Pollution*, 140, 87-94. doi:10.1016/j.envpol.2005.06.021
- Nishimura N, Miyabara Y, Suzuki JS, Sato M, Aoki Y, Satoh M, Yonemoto J and Tohyama C, 2001. Induction of metallothionein in the livers of female Sprague-Dawley rats treated with 2,3,7,8-tetrachlorodibenzo-*p*-dioxin. *Life Sciences*, 69, 1291-1303.
- Nishimura N, Miyabara Y, Sato M, Yonemoto J and Tohyama C, 2002. Immunohistochemical localization of thyroid stimulating hormone induced by a low oral dose of 2,3,7,8-tetrachlorodibenzo *p*-dioxin in female Sprague-Dawley rats. *Toxicology*, 171, 73-82.
- Nishimura N, Yonemoto J, Miyabara Y, Sato M and Tohyama C, 2003. Rat thyroid hyperplasia induced by gestational and lactational exposure to 2,3,7,8-tetrachlorodibenzo-*p*-dioxin. *Endocrinology*, 144, 2075-2083.
- Nishimura K, Miyamoto S, Takeda T, Ando M and Tanabe S, 2005. Dioxin concentrations in body tissues and egg of female chicken. *Journal of Poultry Science*, 42, 346-355. doi:10.2141/jpsa.42.346
- Niskar AS, Needham LL, Rubin C, Turner WE, Martin CA, Patterson DG, Jr., Hasty L, Wong L-Y and Marcus M, 2009. Serum dioxins, polychlorinated biphenyls, and endometriosis: A case-control study in Atlanta. *Chemosphere*, 74, 944-949. doi:10.1016/j.chemosphere.2008.10.005
- Nix JS, 2010. The John Nix Farm Management Pocketbook. 40th Edition. The Anderson Centre.
- Nohara K, Fujimaki H, Tsukumo S, Ushio H, Miyabara Y, Kijima M, Tohyama C and Yonemoto J, 2000. The effects of perinatal exposure to low doses of 2,3,7,8-tetrachlorodibenzo-*p*-dioxin on immune organs in rats. *Toxicology*, 154, 123-133. doi:10.1016/s0300-483x(00)00323-1
- Nosek JA, Sullivan JR, Craven SR, Gendronfitzpatrick A and Peterson RE, 1993. Embryotoxicity of 2,3,7,8-tetrachlorodibenzo-*p*-dioxin in the ring-necked pheasant. *Environmental Toxicology and Chemistry*, 12, 1215-1222. doi:10.1002/etc.5620120710
- Nowack N, Wittsiepe J, Kasper-Sonnenberg M, Wilhelm M and Scholmerich A, 2015. Influence of Low-Level Prenatal Exposure to PCDD/Fs and PCBs on Empathizing, Systemizing and Autistic Traits: Results from the Duisburg Birth Cohort Study. *Plos One*, 10, e0129906. doi:10.1371/journal.pone.0129906

- NRC (National Research Council), 1982. Nutrient requirements of Mink and Foxes. 2nd, Revised edition. National Academies Press, Washington, DC.
- NRC (National Research Council), 2000. Nutrient requirements of beef cattle: 7th Revised Edition (Updated 2000). National Academies Press, Washington, DC.
- NRC (National Research Council), 2006. Nutrient requirements of dogs and cats. National Academies Press, Washington, DC.
- NRC (National Research Council), 2007a. Nutrient requirements of small ruminants: sheep, goats, cervids and new world camelids. US National Academy of Science, Washington DC.
- NRC (National Research Council), 2007b. Nutrient requirement of horses. 6th Revised Edition. National Academies Press, Washington, DC.
- NTP (National Toxicology Programme), 2006. Technical report on the toxicology and carcinogenesis studies of 2,3,7,8-tetrachlorodibenzo-*p*-dioxin (TCDD) (CAS NO. 1746-01-6) in female Harlan Sprague-Dawley rats (gavage studies). NTP TR 521. NIH Publication No. 06-4468. National Institutes of Health. Public Health Service. U.S. Department of Health and Human Services.
- NTP (National Toxicology Program), 2015. Handbook for conducting a literature-based health assessment using OHAT approach for systematic review and evidence integration. National Toxicology Program, US Department of Health and Human Services. Office of Health Assessment and Translation (OHAT). Available online: <https://ntp.niehs.nih.gov/pubhealth/hat/noms/index-2.html#OHAT-Systematic-Review-Publications>
- Nyska A, Jokinen MP, Brix AE, Sells DM, Wyde ME, Orzech D, Haseman JK, Flake G and Walker NJ, 2004. Exocrine pancreatic pathology in female harlan Sprague-Dawley rats after chronic treatment with 2,3,7,8-tetrachlorodibenzo-*p*-dioxin and dioxin-like compounds. *Environmental Health Perspectives*, 112, 903-909.
- Nyska A, Yoshizawa K, Jokinen MP, Brix AE, Sells DM, Wyde ME, Orzech DP, Kissling GE and Walker NJ, 2005. Olfactory epithelial metaplasia and hyperplasia in female Harlan Sprague-Dawley rats following chronic treatment with polychlorinated biphenyls. *Toxicologic Pathology*, 33, 371-377.
- O'Keefe PW, Hilker DR, Smith RM, Aldous KM, Donnelly RJ, Long D and Pope DH, 1986. Nonaccumulation of chlorinated dioxins and furans by goldfish exposed to contaminated sediment and fly-ash. *Bulletin of Environmental Contamination and Toxicology*, 36, 452-459.
- OECD (Organisation for Economic Co-operation and Development), 2009. Guidance document on overview of residue chemistry studies (as revised in 2009). Series on Testing and Assessment number 64 and Series on Pesticides number 32, OECD Environment, Health and Safety Publications, Paris, ENV/JM/MONO (2009) 31, 93 pp
- Ohsako S, Miyabara Y, Nishimura N, Kurosawa S, Sakaue M, Ishimura R, Sato M, Takeda K, Aoki Y, Sone H, Tohyama C and Yonemoto J, 2001. Maternal exposure to a low dose of 2,3,7,8-tetrachlorodibenzo-*p*-dioxin (TCDD) suppressed the development of reproductive organs of male rats: Dose-dependent increase of mRNA levels of 5 alpha-reductase type 2 in contrast to decrease of androgen receptor in the pubertal ventral prostate. *TOXICOLOGICAL SCIENCES*, 60, 132-143.
- Oliver IW, Macgregor K, Godfrey JD, Harris L and Duguid A, 2015. Lipid increases in European eel (*Anguilla anguilla*) in Scotland 1986-2008: an assessment of physical parameters and the influence of organic pollutants. *Environmental Science and Pollution Research*, 22, 7519-7528. doi:10.1007/s11356-015-4116-4
- Olli JJ, Breivik H, Morkore T, Ruyter T, Johansen J, Reynolds P, Thorstad O and Berge G, 2010. Removal of persistent organic pollutants from Atlantic salmon (*Salmo salar* L.) diets: Influence on growth, feed utilization efficiency and product quality. *Aquaculture*, 310, 145-155.
- Olufsen M and Arukwe A, 2011. Developmental effects related to angiogenesis and osteogenic differentiation in Salmon larvae continuously exposed to dioxin-like 3,3',4,4'-tetrachlorobiphenyl (congener 77). *Aquat Toxicol*, 105, 669-680. doi:10.1016/j.aquatox.2011.09.005



- Ortiz-Delgado JB and Sarasquete C, 2004. Toxicity, histopathological alterations and immunohistochemical CYP1A induction in the early life stages of the seabream, *Sparus aurata*, following waterborne exposure to B(a)P and TCDD. *J Mol Histol*, 35, 29-45.
- Oskam IC, Lyche JL, Krogenaes A, Thomassen R, Skaare JU, Wiger R, Dahl E, Sweeney T, Stien A and Ropstad E, 2005. Effects of long-term maternal exposure to low doses of PCB126 and PCB153 on the reproductive system and related hormones of young male goats. *Reproduction*, 130, 731-742. doi:10.1530/rep.1.00690
- Otto DME, Sen CK, Hidiroglou N, Madere R and Moon TW, 1997. Role of exogenous glutathione in teleost fish and its effects on antioxidant defense responses in rainbow trout exposed to 3,3',4,4'-tetrachlorobiphenyl. *Fish Physiology and Biochemistry*, 16, 449-457. doi:10.1023/a:1007765609695
- Uunnas F, Feidt C, Toussaint H, Marchand P, Bizec BL, Rychen G and Jurjanz S, 2010. Polychlorinated biphenyl and low polybrominated diphenyl ether transfer to milk in lactating goats chronically exposed to contaminated soil. *Environ Sci Technol*, 44, 2682-2688. doi:10.1021/es9036786
- Palace VP, Klaverkamp JF, Lockhart WL, Metner DA, Muir DCG and Brown SB, 1996. Mixed-function oxidase enzyme activity and oxidative stress in lake trout (*Salvelinus namaycush*) exposed to 3,3',4,4',5-pentachlorobiphenyl (PCB-126). *Environmental Toxicology and Chemistry*, 15, 955-960. doi:10.1897/1551-5028(1996)015<0955:mfoeaa>2.3.co;2
- Palace VP, Klaverkamp JF, Baron CL and Brown SB, 1997. Metabolism of H-3-retinol by lake trout (*Salvelinus namaycush*) pre-exposed to 3,3',4,4',5-pentachlorobiphenyl (PCB 126). *Aquatic Toxicology*, 39, 321-332. doi:10.1016/s0166-445x(97)00025-8
- Palstra AP, van Ginneken VJ, Murk AJ and van den Thillart GE, 2006. Are dioxin-like contaminants responsible for the eel (*Anguilla anguilla*) drama? *Naturwissenschaften*, 93, 145-148. doi:10.1007/s00114-005-0080-z
- Panton SW, Smith F, Fernandes A and Foxall C, 2013. Transfer and uptake of dioxins and polychlorinated biphenyls (PCBs) into sheep: a case study. In: Eds Rose M and Fernandes A. *Persistent Organic Pollutants and Toxic Metals in Foods*. 145-172.
- Papadopoulou E, Caspersen IH, Kvaalem HE, Knutsen HK, Duarte-Salles T, Alexander J, Meltzer HM, Kogevinas M, Brantsaeter AL and Haugen M, 2013. Maternal dietary intake of dioxins and polychlorinated biphenyls and birth size in the Norwegian Mother and Child Cohort Study (MoBa). *Environment International*, 60, 209-216. doi:10.1016/j.envint.2013.08.017
- Papadopoulou E, Kogevinas M, Botsivali M, Pedersen M, Besselink H, Mendez MA, Fleming S, Hardie LJ, Knudsen LE, Wright J, Agramunt S, Sunyer J, Granum B, Gutzkow KB, Brunborg G, Alexander J, Meltzer HM, Brantsaeter AL, Sarri K, Chatzi L, Merlo DF, Kleinjans JC and Haugen M, 2014. Maternal diet, prenatal exposure to dioxin-like compounds and birth outcomes in a European prospective mother-child study (NewGeneris). *Science of the Total Environment*, 484, 121-128. doi:10.1016/j.scitotenv.2014.03.047
- Parera J, Abalos M, Perez-Vendrell AM, Brufau J, de Juan F, Escribano F, Abad E and Rivera J, 2008. Occurrence and bioaccumulation study of PCDD and PCDF from mineral feed additives. *Chemosphere*, 73, S252-260. doi:10.1016/j.chemosphere.2007.04.089
- Patandin S, Lanting CI, Mulder PGH, Boersma ER, Sauer PJJ and Weisglas-Kuperus N, 1999. Effects of environmental exposure to polychlorinated biphenyls and dioxins on cognitive abilities in Dutch children at 42 months of age. *The Journal of Pediatrics*, 134, 33-41. doi:https://doi.org/10.1016/S0022-3476(99)70369-0
- Patterson RM, Stachlewitz R and Germolec D, 2003. Induction of apoptosis by 2,3,7,8-tetrachlorodibenzo-*p*-dioxin following endotoxin exposure. *Toxicology and Applied Pharmacology*, 190, 120-134.
- Paterson G, Drouillard KG and Haffner GD, 2007. PCB elimination by yellow perch (*Perca flavescens*) during an annual temperature cycle. *Environmental Science & Technology*, 41, 824-829. doi:10.1021/es060266r

- Paterson G, Liu J, Haffner GD and Drouillard KG, 2010. Contribution of Fecal Egestion to the Whole Body Elimination of Polychlorinated Biphenyls by Japanese Koi (*Cyprinus carpio*). *Environmental Science and Technology*, 44, 5769-5774.
- Pauwels A, Schepens PJ, D'Hooghe T, Delbeke L, Dhont M, Brouwer A and Weyler J, 2001. The risk of endometriosis and exposure to dioxins and polychlorinated biphenyls: a case-control study of infertile women. *Hum Reprod*, 16, 2050-2055.
- Pavuk M, Schecter AJ, Akhtar FZ and Michalek JE, 2003. Serum 2,3,7,8-tetrachlorodibenzo-*p*-dioxin (TCDD) levels and thyroid function in Air Force veterans of the Vietnam War. *Ann Epidemiol*, 13, 335-343.
- Pavuk M, Michalek JE, Schecter A, Ketchum NS, Akhtar FZ and Fox KA, 2005. Did TCDD exposure or service in southeast Asia increase the risk of cancer in air force Vietnam veterans who did not spray agent orange? *Journal of Occupational and Environmental Medicine*, 47, 335-342. doi:10.1097/01.jom.0000158739.56427.24
- Pavuk M, Michalek JE and Ketchum NS, 2006. Prostate cancer in US Air Force veterans of the Vietnam war. *J Expo Sci Environ Epidemiol*, 16, 184-190. doi:10.1038/sj.jea.7500448
- Peden-Adams M, Alonso K, Godard C, Skipper S, Mashburn W, Hoover J, Charbonneau C, Henshel D and Dickerson R, 1998. Effects of environmentally relevant concentrations of 2,3,7,8-TCDD on domestic chicken immune function and CYP450 activity: F1 generation and egg injection studies. *Chemosphere*, 37, 1923-1939.
- Pelcova D, Fenclova Z, Dlaskova Z, Urban P, Lukas E, Prochazka B, Rappe C, Preiss J, Kocan A and Vejtlupkova J, 2001. Biochemical, neuropsychological, and neurological abnormalities following 2,3,7,8-tetrachlorodibenzo-*p*-dioxin (TCDD) exposure. *Arch Environ Health*, 56, 493-500. doi:10.1080/00039890109602897
- Pelcova D, Fenclova Z, Preiss J, Prochazka B, Spacil J, Dubska Z, Okrouhlik B, Lukas E and Urban P, 2002. Lipid metabolism and neuropsychological follow-up study of workers exposed to 2,3,7,8-tetrachlorodibenzo-*p*-dioxin. *Int Arch Occup Environ Health*, 75 Suppl, S60-66. doi:10.1007/s00420-002-0350-4
- Pelcova D, Prazny M, Skrha J, Fenclova Z, Kalousova M, Urban P, Navratil T, Senholdova Z and Smerhovsky Z, 2007. 2,3,7,8-TCDD exposure, endothelial dysfunction and impaired microvascular reactivity. *Human & experimental toxicology*, 26, 705-713. doi:10.1177/0960327107083971
- Pelcova D, Fenclova Z, Urban P, Ridzon P, Preiss J, Kupka K, Malik J, Dubska Z and Navratil T, 2009. Chronic health impairment due to 2,3,7,8-tetrachloro-dibenzo-*p*-dioxin exposure. *Neuroendocrinology letters*, 30, 219-224.
- Peltonen H, Kiljunen M, Kiviranta H, Vuorinen PJ, Verta M and Karjalainen J, 2007. Predicting effects of exploitation rate on weight-at-age, population dynamics, and bioaccumulation of PCDD/Fs and PCBs in herring (*Clupea harengus* L.) in the Northern Baltic Sea. *Environmental Science & Technology*, 41, 1849-1855. doi:10.1021/es0618346
- Perucatti A, Di Meo GP, Albarella S, Ciotola F, Incarnato D, Jambrenghi AC, Peretti V, Vonghia G and Iannuzzi L, 2006. Increased frequencies of both chromosome abnormalities and SCEs in two sheep flocks exposed to high dioxin levels during pasturage. *Mutagenesis*, 21, 67-75. doi:10.1093/mutage/gei076
- Pesatori AC, Zocchetti C, Guercilena S, Consonni D, Turrini D and Bertazzi PA, 1998. Dioxin exposure and non-malignant health effects: a mortality study. *Occupational and Environmental Medicine*, 55, 126-131.
- Pesatori AC, Baccarelli A, Consonni D, Lania A, Beck-Peccoz P, Bertazzi PA and Spada A, 2008. Aryl hydrocarbon receptor-interacting protein and pituitary adenomas: a population-based study on subjects exposed to dioxin after the Seveso, Italy, accident. *Eur J Endocrinol*, 159, 699-703. doi:10.1530/eje-08-0593



- Pesatori AC, Consonni D, Rubagotti M, Grillo P and Bertazzi PA, 2009. Cancer incidence in the population exposed to dioxin after the "Seveso accident": twenty years of follow-up. *Environmental Health*, 8. doi:10.1186/1476-069X-8-39
- Petro EM, Covaci A, Leroy JL, Dirtu AC, De Coen W and Bols PE, 2010. Occurrence of endocrine disrupting compounds in tissues and body fluids of Belgian dairy cows and its implications for the use of the cow as a model to study endocrine disruption. *Sci Total Environ*, 408, 5423-5428. doi:10.1016/j.scitotenv.2010.07.051
- Phadnis-Moghe AS, Chen W, Li J, Crawford RB, Bach A, D'Ingillo S, Kovalova N, Suarez-Martinez JE, Kaplan BLF, Harrill JA, Budinsky R, Rowlands JC, Thomas RS and Kaminski NE, 2016. Immunological characterization of the aryl hydrocarbon receptor (AHR) knockout rat in the presence and absence of 2,3,7,8-tetrachlorodibenzo-*p*-dioxin (TCDD). *Toxicology*, 368, 172-182.
- Phua STG, Davey KR and Daughtry BJ, 2007. A new risk framework for predicting chemical residue(s) - Preliminary research for PCBs and PCDD/Fs in farmed Australian Southern Bluefin Tuna (*Thunnus maccoyii*). *Chemical Engineering and Processing*, 46, 491-496. doi:10.1016/j.cep.2006.06.016
- Pirard C and De Pauw E, 2005. Uptake of polychlorodibenzo-*p*-dioxins, polychlorodibenzofurans and coplanar polychlorobiphenyls in chickens. *Environment International*, 31, 585-591. doi:10.1016/j.envint.2004.10.008
- Pirard C and De Pauw E, 2006. Toxicokinetic study of dioxins and furans in laying chickens. *Environment International*, 32, 466-469. doi:10.1016/j.envint.2005.10.005
- Piskorska-Pliszczynska J, Mikolajczyk S, Warenik-Bany M, Maszewski S and Strucinski P, 2014. Soil as a source of dioxin contamination in eggs from free-range hens on a Polish farm. *Science of the Total Environment*, 466, 447-454. doi:10.1016/j.scitotenv.2013.07.061
- Ploteau S, Cano-Sancho G, Volteau C, Legrand A, Vénisseau A, Vacher V, Marchand P, Le Bizec B and Antignac J-P, 2017. Associations between internal exposure levels of persistent organic pollutants in adipose tissue and deep infiltrating endometriosis with or without concurrent ovarian endometrioma. *Environment International* 108, 195–203. doi: 10.1016/j.envint.2017.08.019
- Porpora MG, Medda E, Abballe A, Bolli S, De Angelis I, di Domenico A, Ferro A, Ingelido AM, Maggi A, Panici PB and De Felip E, 2009. Endometriosis and organochlorinated environmental pollutants: a case-control study on Italian women of reproductive age. *Environ Health Perspect*, 117, 1070-1075. doi:10.1289/ehp.0800273
- Porte C and Albaiges J, 1994. Bioaccumulation patterns of hydrocarbons and polychlorinated-biphenyls in bivalves, crustaceans, and fishes. *Archives of Environmental Contamination and Toxicology*, 26, 273-281
- Powell DC, Aulerich RJ, Meadows JC, Tillitt DE, Giesy JP, Stromberg KL and Bursian SJ, 1996. Effects of 3,3',4,4',5-pentachlorobiphenyl (PCB 126) and 2,3,7,8-tetrachlorodibenzo-*p*-dioxin (TCDD) injected into the yolks of chicken (*Gallus domesticus*) eggs prior to incubation. *Arch Environ Contam Toxicol*, 31, 404-409. doi: 10.1007/BF00212680
- Qiao GL and Riviere JE, 2001. Enhanced systemic tissue distribution after dermal versus intravenous 3,3',4,4'-tetrachlorobiphenyl exposure: limited utility of radiolabel blood area under the curve and excretion data in dermal absorption calculations and tissue exposure assessment. *Toxicol Appl Pharmacol*, 177, 26-37. doi:10.1006/taap.2001.9284
- Quabius ES, Balm PH and Wendelaar Bonga SE, 1997. Interrenal stress responsiveness of tilapia (*Oreochromis mossambicus*) is impaired by dietary exposure to PCB 126. *Gen Comp Endocrinol*, 108, 472-482. doi:10.1006/gcen.1997.7003
- Quabius ES, Nolan DT, Allin CJ and Bonga SEW, 2000. Influence of dietary exposure to polychlorinated biphenyl 126 and nutritional state on stress response in tilapia (*Oreochromis mossambicus*) and rainbow trout (*Oncorhynchus mykiss*). *Environmental Toxicology and Chemistry*, 19, 2892-2899. doi:10.1897/1551-5028(2000)019<2892:iodetp>2.0.co;2
- Rankouhi TR, Sanderson JT, van Holsteijn I, van Leeuwen C, Vethaak AD and van den Berg M, 2004. Effects of natural and synthetic estrogens and various environmental contaminants on

- vitellogenesis in fish primary hepatocytes: comparison of bream (*Abramis brama*) and carp (*Cyprinus carpio*). *Toxicological Sciences*, 81, 90-102. doi:10.1093/toxsci/kfh176
- Rebourcet D, Odet F, Verot A, Combe E, Meugnier E, Pesenti S, Leduque P, Dechaud H, Magre S and Le Magueresse-Battistoni B, 2010. The effects of an in utero exposure to 2,3,7,8-tetrachlorodibenzo-*p*-dioxin on male reproductive function: identification of Ccl5 as a potential marker. *International Journal of Andrology*, 33, 413-424. doi:10.1111/j.1365-2605.2009.01020.x
- Regala RP, Rice CD, Schwedler TE and Dorociak IR, 2001. The effects of tributyltin (TBT) and 3,3',4,4',5-pentachlorobiphenyl (PCB-126) mixtures on antibody responses and phagocyte oxidative burst activity in channel catfish, *Ictalurus punctatus*. *Archives of Environmental Contamination and Toxicology*, 40, 386-391.
- Rennert A, Wittsiepe J, Kasper-Sonnenberg M, Binder G, Fürst P, Cramer C, Krämer U and Wilhelm M, 2012. Prenatal and Early Life Exposure to Polychlorinated Dibenzo-*p*-Dioxins, Dibenzofurans and Biphenyls May Influence Dehydroepiandrosterone Sulfate Levels at Prepubertal Age: Results from the Duisburg Birth Cohort Study. *Journal of Toxicology and Environmental Health, Part A*, 75:19-20, 1232-1240. doi: 10.1080/15287394.2012.709375
- Restum JC, Bursian SJ, Giesy JP, Render JA, Helferich WC, Shipp EB, Verbrugge DA and Aulerich RJ, 1998. Multigenerational study of the effects of consumption of PCB-contaminated carp from Saginaw Bay, Lake Huron, on mink. 1. Effects on mink reproduction, kit growth and survival, and selected biological parameters. *Journal of Toxicology and Environmental Health-Part A*, 54, 343-375.
- Rhind SM, Kyle CE, Mackie C and McDonald L, 2009. Accumulation of endocrine disrupting compounds in sheep fetal and maternal liver tissue following exposure to pastures treated with sewage sludge. *J Environ Monit*, 11, 1469-1476. doi:10.1039/b902085c
- Rhind SM, Kyle CE, Mackie C, McDonald L, Zhang Z, Duff EI, Bellingham M, Amezaga MR, Mandon-Pepin B, Loup B, Cotinot C, Evans NP, Sharpe RM and Fowler PA, 2010. Maternal and fetal tissue accumulation of selected endocrine disrupting compounds (EDCs) following exposure to sewage sludge-treated pastures before or after conception. *J Environ Monit*, 12, 1582-1593. doi:10.1039/c0em00009d
- Rhind SM, Kyle CE, Kerr C, Osprey M and Zhang ZL, 2011. Effect of duration of exposure to sewage sludge-treated pastures on liver tissue accumulation of persistent endocrine disrupting compounds (EDCs) in sheep. *Sci Total Environ*, 409, 3850-3856. doi:10.1016/j.scitotenv.2011.03.021
- Rice DC and Hayward S, 1998. Lack of effect of 3,3',4,4',5-pentachlorobiphenyl (PCB 126) throughout gestation and lactation on multiple fixed interval fixed ratio and DRL performance in rats. *Neurotoxicology and Teratology*, 20, 645-650.
- Rice DC and Hayward S, 1999. Effects of exposure to 3,3',4,4',5-pentachlorobiphenyl (PCB 126) throughout gestation and lactation on behavior (concurrent random interval-random interval and progressive ratio performance) in rats. *Neurotoxicology and Teratology*, 21, 679-687.
- Rice DC, 1999. Effect of exposure to 3,3',4,4',5-pentachlorobiphenyl (PCB 126) throughout gestation and lactation on development and spatial delayed alternation performance in rats. *Neurotoxicology and Teratology*, 21, 59-69.
- Rier SE, Martin DC, Bowman RE, Dmowski WP and Becker JL, 1993. Endometriosis in Rhesus-monkeys (*Macaca mulatta*) following chronic exposure to 2,3,7,8-tetrachlorodibenzo-*p*-dioxin. *Fundamental and Applied Toxicology*, 21, 433-441. doi:10.1006/faat.1993.1119
- Rier SE, Turner WE, Martin DC, Morris R, Lucier GW and Clark GC, 2001a. Serum levels of TCDD and dioxin-like chemicals in rhesus monkeys chronically exposed to dioxin: correlation of increased serum PCB levels with endometriosis. *Toxicol. Sci.*, 59, 147-159.
- Rier SE, Coe CL, Lemieux AM, Martin DC, Morris R, Lucier GW and Clark GC, 2001b. Increased tumor necrosis factor- $\alpha$  production by peripheral blood leukocytes from TCDD-exposed rhesus monkeys. *Toxicol. Sci.*, 60, 327-337.

- Rifkind AB, Firpo A, Jr. and Alonso DR, 1984. Coordinate induction of cytochrome P-448 mediated mixed function oxidases and histopathologic changes produced acutely in chick embryo liver by polychlorinated biphenyl congeners. *Toxicol Appl Pharmacol*, 72, 343-354. doi:10.1016/0041-008X(84)90319-3
- Roelens SA, Beck V, Maervoet J, Aerts G, Reyns GE, Schepens P and Darras VA, 2005. The dioxin-like PCB 77 but not the ortho-substituted PCB 153 interferes with chicken embryo thyroid hormone homeostasis and delays hatching. *General and Comparative Endocrinology*, 143, 1-9. doi:10.1016/j.ygcen.2005.02.015
- Rooney AA, Boyles AL, Wolfe MS, Bucher JR and Thayer KA, 2014. Systematic review and evidence integration for literature-based environmental health science assessments. *Environmental Health Perspectives*, 122, 711-718.
- Rose M, Fernandes A, Foxall C and Dowding A, 2012. Transfer and uptake of polychlorinated dibenzo-*p*-dioxins and furans (PCDD/Fs) and polychlorinated biphenyls (PCBs) into meat and organs of indoor and outdoor reared pigs. *Food Addit Contam Part A Chem Anal Control Expo Risk Assess*, 29, 431-448. doi:10.1080/19440049.2011.635346
- Rossi F, Bertuzzi T, Vitali A, Rubini A, Masoero F, Morlacchini M and Piva G, 2010. Monitoring of the declining trend of Polychlorobiphenyls concentration in milk of contaminated dairy cows. *Italian Journal of Animal Science*, 9, 88-92. doi:10.4081/ijas.2010.e18
- Rowlands JC, Budinsky RA, Aylward LL, Faqi AS and Carney EW, 2006. Sex ratio of the offspring of Sprague-Dawley rats exposed to 2,3,7,8-tetrachlorodibenzo-*p*-dioxin (TCDD) in utero and lactationally in a three-generation study. *Toxicology and Applied Pharmacology*, 216, 29-33.
- Ruus A, Daae IA and Hylland K, 2012. Accumulation of polychlorinated biphenyls from contaminated sediment by Atlantic cod (*Gadus morhua*): Direct accumulation from resuspended sediment and dietary accumulation via the polychaete *Nereis virens*. *Environmental Toxicology and Chemistry*, 31, 2472-2481. doi:10.1002/etc.1973
- Ryan JJ, 1983. Higher chlorinated dioxins implicated in the mortality of young-pigs kept on a pentachlorophenol-treated wooden floor. *Can Vet*, 24, 72-75.
- Ryan JJ, Amirova Z and Carrier G, 2002. Sex ratios of children of Russian pesticide producers exposed to dioxin. *Environmental Health Perspectives*, 110, A699-A701. doi:10.1289/ehp.021100699
- Rychen G, Laurent C, Feidt C, Grova N, Lafargue PE, Hachimi A and Laurent F, 2002. Milk-arterial plasma transfer of PCDDs and PCDFs in pigs. *J Agric Food Chem*, 50, 1695-1699.
- Saberi Hosnijeh F, Boers D, Portengen L, Bueno-de-Mesquita HB, Heederik D and Vermeulen R, 2011. Long-term effects on humoral immunity among workers exposed to 2,3,7,8-tetrachlorodibenzo-*p*-dioxin (TCDD). *Occup Environ Med*, 68, 419-424. doi:10.1136/oem.2010.058016
- Saberi Hosnijeh F, Lenters V, Boers D, Portengen L, Baeten E, Bueno-de-Mesquita HB, Heederik DJ, Bloem AC and Vermeulen R, 2012. Changes in lymphocyte subsets in workers exposed to 2,3,7,8-tetrachlorodibenzo-*p*-dioxin (TCDD). *Occup Environ Med*, 69, 781-786. doi:10.1136/oemed-2011-100463
- Saberi Hosnijeh F, Portengen L, Bueno-de-Mesquita HB, Heederik D and Vermeulen R, 2013. Circulating soluble CD27 and CD30 in workers exposed to 2,3,7,8-Tetrachlorodibenzo-*p*-dioxin (TCDD). *Cancer Epidemiol Biomarkers Prev*, 22, 2420-2424. doi:10.1158/1055-9965.epi-13-0651
- Sakurai T, Kobayashi J, Imaizumi Y and Suzuki N, 2009. Non-food-chain transfer of sediment-associated persistent organic pollutants to a marine benthic fish. *Mar Pollut Bull*, 58, 1072-1077. doi:10.1016/j.marpolbul.2009.04.009
- Sawyer T, Jones D, Rosanoff K, Mason G, Piskorska-Pliszczynska J and Safe S, 1986. The biologic and toxic effects of 2,3,7,8-tetrachlorodibenzo-*p*-dioxin in chickens. *Toxicology*, 39, 197-206. doi:10.1016/0300-483X(86)90136-8
- SCAN (Scientific Committee on Animal Nutrition), 2000. Dioxin Contamination of feedingstuffs and their contribution to the contamination of food of animal origin. Available at: [https://ec.europa.eu/food/sites/food/files/safety/docs/animal-feed-undes-sub-out55\\_en.pdf](https://ec.europa.eu/food/sites/food/files/safety/docs/animal-feed-undes-sub-out55_en.pdf)

- SCF (Scientific Committee on Food), 2000. Opinion on the risk assessment of dioxins and dioxin-like PCBs in food. SCF/CS/CNTM/DIOXIN/8 Final. SCF, Health and Consumer Protection Directorate-General, European Commission. Brussels, 141 pp. Available from [http://ec.europa.eu/food/fs/sc/scf/out78\\_en.pdf](http://ec.europa.eu/food/fs/sc/scf/out78_en.pdf)
- SCF (Scientific Committee on Food), 2001. Opinion on the risk assessment of dioxins and dioxinlike PCB in food (update based on the new scientific information available since the adoption of the SCF opinion of 22 November 2000) (adopted by the SCF on 30 May 2001), 29 pp. Available from [http://ec.europa.eu/food/fs/sc/scf/out90\\_en.pdf](http://ec.europa.eu/food/fs/sc/scf/out90_en.pdf)
- Schantz SL, Laughlin NK, Van Valkenberg HC and Bowman RE, 1986. Maternal care by Rhesus monkeys of infant monkeys exposed to either lead or 2,3,7,8-tetrachlorodibenzo-*p*-dioxin. *Neuro Toxicology*, 7, 637-650.
- Schantz SL and Bowman RE, 1989. Learning in monkeys exposed perinatally to 2,3,7,8-tetrachlorodibenzo-*para*-dioxin (TCDD). *Neurotoxicology and Teratology*, 11, 13-19. doi:10.1016/0892-0362(89)90080-9
- Schnitzler JG, Koutrakis E, Siebert U, Thome JP and Das K, 2008. Effects of persistent organic pollutants on the thyroid function of the European sea bass (*Dicentrarchus labrax*) from the Aegean sea, is it an endocrine disruption? *Mar Pollut Bull*, 56, 1755-1764. doi:10.1016/j.marpolbul.2008.06.011
- Schnitzler JG, Klaren PHM, Bouquegneau J-M and Das K, 2012. Environmental factors affecting thyroid function of wild sea bass (*Dicentrarchus labrax*) from European coasts. *Chemosphere*, 87, 1009-1017. doi:10.1016/j.chemosphere.2011.11.039
- Schnorr TM, Lawson CC, Whelan EA, Dankovic DA, Deddens JA, Piacitelli LA, Reefhuis J, Sweeney MH, Connally LB and Fingerhut MA, 2001. Spontaneous abortion, sex ratio, and paternal occupational exposure to 2,3,7,8-tetrachlorodibenzo-*p*-dioxin. *Environmental Health Perspectives*, 109, 1127-1132. doi:10.2307/3454859
- Schulz AJ, Wiesmuller T, Appuhn H, Stehr D, Severin K, Landmann D and Kamphues J, 2005. Dioxin concentration in milk and tissues of cows and sheep related to feed and soil contamination. *Journal of Animal Physiology and Animal Nutrition*, 89, 72-78.
- Schultz S, Vallant B and Kainz MJ, 2012. Preferential feeding on high quality diets decreases methyl mercury of farm-raised common carp (*Cyprinus carpio* L.). *Aquaculture*, 338-341, 105-110. <https://doi.org/10.1016/j.aquaculture.2012.01.006>
- Schwetz BA, Norris JM, Sparschu GL, Rowe UK, Gehring PJ, Emerson JL and Gerbig CG, 1973. Toxicology of chlorinated dibenzo-*p*-dioxins. *Environ Health Perspect*, 5, 87-99.
- Sechman A, Hrabia A, Lis MW and Niedziolka J, 2011. Effect of 2,3,7,8-tetrachlorodibenzo-*p*-dioxin (TCDD) on steroid concentrations in blood and gonads of chicken embryo. *Toxicology Letters*, 205, 190-195. doi:10.1016/j.toxlet.2011.06.004
- Serrano R, Simal-Julian A, Pitarch E, Hernandez F, Varo I and Navarro JC, 2003. Biomagnification study on organochlorine compounds in marine aquaculture: the sea bass (*Dicentrarchus labrax*) as a model. *Environmental Science and Technology*, 37, 3375-3381.
- Servizi JA, Gordon RW, Martens DW, Lockhart WL, Metner DA, Rogers IH, McBride JR and Norstrom RJ, 1993. Effects of biotreated bleached kraft mill effluent on fingerling chinook salmon (*Oncorhynchus tshawytscha*). *Canadian Journal of Fisheries and Aquatic Sciences*, 50, 846-857.
- Servos MR, Muir DCG and Webster GRB, 1989. The effect of dissolved organic-matter on the bioavailability of polychlorinated dibenzo-*para*-dioxins. *Aquatic Toxicology*, 14, 169-184. doi:10.1016/0166-445x(89)90026-x
- Shen H, Henkelmann B, Rambeck WA, Mayer R, Wehr U and Schramm K-W, 2012a. Physiologically based persistent organic pollutant accumulation in pig tissues and their edible safety differences: An *in vivo* study. *Food Chemistry*, 132, 1830-1835. doi:10.1016/j.foodchem.2011.12.015

- Shen H, Henkelmann B, Rambeck WA, Mayer R, Wehr U and Schramm KW, 2012b. The predictive power of the elimination of dioxin-like pollutants from pigs: an *in vivo* study. *Environ Int*, 38, 73-78. doi:10.1016/j.envint.2011.08.009
- Sherman WR, Keenan RE and Gunster DG, 1992. Reevaluation of dioxin bioconcentration and bioaccumulation factors for regulatory purposes. *Journal of Toxicology and Environmental Health*, 37, 211-229.
- Shih SI, Wang IC, Wu KY, Li HW, Wang LC and Chang-Chien GP, 2009. Uptake of polychlorinated dibenzo-*p*-dioxins and dibenzofurans in laying ducks. *J Environ Sci Health A Tox Hazard Subst Environ Eng*, 44, 799-807.
- Shimada ALB, Cruz WS, Loiola RA, Drewes CC, Dorr F, Figueiredo NG, Pinto E and Farsky SHP, 2015. Absorption of PCB126 by upper airways impairs G protein-coupled receptor-mediated immune response. *Scientific Reports*, 5 – Oct 2015, 5.
- Shirota M, Kaneko T, Okuyama M, Sakurada Y, Shirota K and Matsuki Y, 2007. Internal dose-effects of 2,3,7,8-tetrachlorodibenzo-*p*-dioxin (TCDD) in gonadotropin-primed weanling rat model. *Archives of Toxicology*, 81, 261-269.
- Sijm D, Yarechewski AL, Muir DCG, Webster GRB, Seinen W and Opperhuizen A, 1990. Biotransformation and tissue distribution of 1,2,3,7-tetrachlorodibenzo-*p*-dioxin, 1,2,3,4,7-pentachlorodibenzo-*p*-dioxin and 2,3,4,7,8-pentachlorodibenzofuran in rainbow-trout. *Chemosphere*, 21, 845-866. doi:10.1016/0045-6535(90)90166-q
- Sijm Dm Part P and Opperhuizen A, 1993. The influence of temperature on the uptake rate constants of hydrophobic compounds determined by the isolated perfused gills of rainbow-trout (*Oncorhynchus mykiss*). *Aquatic Toxicology*, 25, 1-14. doi:10.1016/0166-445x(93)90016-t
- Sijm DTHM, Verberne ME, de Jonge WJ, Pärt P and Opperhuizen A, 1995. Allometry in the uptake of hydrophobic chemicals determined *in vivo* and in isolated-perfused gills. *Toxicology and Applied Pharmacology*, 131, 130-135.
- Simsa P, Mihalyi A, Schoeters G, Koppen G, Kyama CM, Den Hond EM, Fueleop V and D'Hooghe TM, 2010. Increased exposure to dioxin-like compounds is associated with endometriosis in a case-control study in women. *Reproductive Biomedicine Online*, 20, 681-688. doi:10.1016/j.rbmo.2010.01.018
- Sioen I, Den Hond E, Nelen V, Van de Mierop E, Croes K, Van Larebeke N, Nawrot TS and Schoeters G, 2013. Prenatal exposure to environmental contaminants and behavioural problems at age 7–8 years. *Environment International*, 59, 225-231. doi:https://doi.org/10.1016/j.envint.2013.06.014
- Slezak BP, Hatch GE, Devito MJ, Diliberto JJ, Slade R, Crissman K, Hassoun E and Birnbaum LS, 2000. Oxidative stress in female B6C3F1 mice following acute and subchronic exposure to 2,3,7,8-tetrachlorodibenzo-*p*-dioxin (TCDD). *Toxicological Sciences*, 54, 390-398.
- Somers JD, Moran ET and Reinhart BS, 1978. Influence of then dietary calcium and phosphorus on integrity of egg-shell as it would influence hatching success and consequences of pre-incubation 2,4,5-T spraying with and without a high TCDD level. *Bulletin of Environmental Contamination and Toxicology*, 19, 648-654.
- Sommer RJ, Hume AJ, Ciak JM, Vannostrand JJ, Friggens M and Walker MK, 2005. Early developmental 2,3,7,8-tetrachlorodibenzo-*p*-dioxin exposure decreases chick embryo heart chronotropic response to isoproterenol but not to agents affecting signals downstream of the beta-adrenergic receptor. *Toxicol Sci*, 83, 363-371. doi:10.1093/toxsci/kfi041
- Spagnuolo MS, Sarubbi F, Rossetti C, Grazioli G, Di Meo GP and Iannuzzi L, 2011. Effect of dioxin exposure on several indices of blood redox status in lactating buffalo cows. *Journal of Dairy Research*, 78, 154-159. doi:10.1017/s0022029911000021
- Spagnuolo MS, Cigliano L, Nebbia C, Rossetti C, Grazioli G and Iannuzzi L, 2012. Analysis of plasma indices of redox homeostasis in dairy cows reared in polluted areas of Piedmont (northern Italy). *Science of the Total Environment*, 433, 450-455. doi:10.1016/j.scitotenv.2012.06.100



- Spear PA and Moon TW, 1986. Thyroid-vitamin A interactions in chicks exposed to 3,4,3',4'-tetrachlorobiphenyl: influence of low dietary vitamin A and iodine. *Environ Res*, 40, 188-198.
- Spitaler M, Iben C and Tausch H, 2005. Dioxin residues in the edible tissue of finishing pigs after dioxin feeding. *J Anim Physiol Anim Nutr (Berl)*, 89, 65-71. doi:10.1111/j.1439-0396.2005.00542.x
- Spitsbergen JM, Kleeman JM and Peterson RE, 1988a. Morphologic lesions and acute toxicity in rainbow trout (*Salmo gairdneri*) treated with 2,3,7,8-tetrachlorodibenzo-*p*-dioxin. *J Toxicol Environ Health*, 23, 333-358. doi:10.1080/15287398809531119
- Spitsbergen JM, Schat KA, Kleeman JM and Peterson RE, 1988b. Effects of 2,3,7,8-tetrachlorodibenzo-*P*-dioxin (TCDD) or arochlor-1254 on the resistance of rainbow-trout, *Salmo gairdneri* Richardson, to infectious hematopoietic necrosis virus. *Journal of Fish Diseases*, 11, 73-83. doi:10.1111/j.1365-2761.1988.tb00524.x
- Sprague M, Bendiksen EA, Dick JR, Strachan F, Pratoomyot J, Berntssen MHG, Tocher DR and Bell JG, 2010. Effects of decontaminated fish oil or a fish and vegetable oil blend on persistent organic pollutant and fatty acid compositions in diet and flesh of Atlantic salmon (*Salmo salar*). *British Journal of Nutrition*, 103, 1442-1451. doi:10.1017/s0007114510000139
- Sprague M, Walton J, Campbell PJ, Strachan F, Dick JR and Bell JG, 2015. Replacement of fish oil with a DHA-rich algal meal derived from *Schizochytrium* sp on the fatty acid and persistent organic pollutant levels in diets and flesh of Atlantic salmon (*Salmo salar*, L.) post-smolts. *Food Chemistry*, 185, 413-421. doi:10.1016/j.foodchem.2015.03.150
- Stanton BJ, Watkins SM, German JB and Lasley BL, 2002. Effect of estrogen and 2,3,7,8-tetrachlorodibenzo-*p*-dioxin (TCDD) on plasma fatty acids of immature male chickens (*Gallus domesticus*). *Comparative Biochemistry and Physiology C-Toxicology & Pharmacology*, 132, 129-142. doi:10.1016/s1532-0456(02)00056-x
- Stanton B, DeWitt J, Henshel D, Watkins S and Lasley B, 2003. Fatty acid metabolism in neonatal chickens (*Gallus domesticus*) treated with 2,3,7,8-tetrachlorodibenzo-*p*-dioxin (TCDD) or 3,3',4,4',5-pentachlorobiphenyl (PCB-126) *in ovo*. *Comparative Biochemistry and Physiology C-Toxicology & Pharmacology*, 136, 73-84. doi:10.1016/j.cca.2003.08.002
- Stapanian MA, Madenjian CP, Rediske RR and O'Keefe JP, 2013. Sexual difference in PCB congener distributions of burbot (*Lota Iota*) from Lake Erie. *Chemosphere*, 93, 1615-1623. doi:10.1016/j.chemosphere.2013.08.016
- Steenland K, Piacitelli L, Deddens J, Fingerhut M and Chang LI, 1999. Cancer, heart disease, and diabetes in workers exposed to 2,3,7,8-tetrachlorodibenzo-*p*-dioxin. *J Natl Cancer Inst*, 91, 779-786.
- Steenland K, Calvert G, Ketchum N and Michalek J, 2001a. Dioxin and diabetes mellitus: an analysis of the combined NIOSH and Ranch Hand data. *Occup Environ Med*, 58, 641-648.
- Steenland K, Deddens J and Piacitelli L, 2001b. Risk assessment for 2,3,7,8-tetrachlorodibenzo-*p*-dioxin (TCDD) based on an epidemiologic study. *Am J Epidemiol*, 154, 451-458.
- Stehr CM, Brown DW, Hom T, Anulacion BF, Reichert WL and Collier TK, 2000. Exposure of juvenile chinook and chum salmon to chemical contaminants in the Hylebos Waterway of Commencement Bay, Tacoma, Washington. *Journal of Aquatic Ecosystem Stress and Recovery*, 7, 215-227. doi:10.1023/a:1009905322386
- Steward AR, Maslanka R, Stuart KG, Kumar S and Sikka HC, 1996. Disposition and metabolism of 2,3,7,8-tetrachlorodibenzofuran by channel catfish (*Ictalurus punctatus*). *Toxicology and Applied Pharmacology*, 139, 430-436. doi:10.1006/taap.1996.0184
- Stolevik SB, Nygaard UC, Namork E, Haugen M, Kvalem HE, Meltzer HM, Alexander J, van Delft JHM, van Loveren H, Lovik M and Granum B, 2011. Prenatal exposure to polychlorinated biphenyls and dioxins is associated with increased risk of wheeze and infections in infants. *Food and Chemical Toxicology*, 49, 1843-1848. doi:10.1016/j.fct.2011.05.002
- Stolevik SB, Nygaard UC, Namork E, Haugen M, Meltzer HM, Alexander J, Knutsen HK, Aaberge I, Vainio K, van Loveren H, Lovik M and Granum B, 2013. Prenatal exposure to polychlorinated

- biphenyls and dioxins from the maternal diet may be associated with immunosuppressive effects that persist into early childhood. *Food and Chemical Toxicology*, 51, 165-172. doi:10.1016/j.fct.2012.09.027
- Su PH, Huang PC, Lin CY, Ying TH, Chen JY and Wang SL, 2012. The effect of in utero exposure to dioxins and polychlorinated biphenyls on reproductive development in eight year-old children. *Environment International*, 39, 181-187. doi:10.1016/j.envint.2011.09.009
- Su PH, Chen HY, Chen SJ, Chen JY, Liou SH and Wang SL, 2015. Thyroid and growth hormone concentrations in 8-year-old children exposed in utero to dioxins and polychlorinated biphenyls. *J Toxicol Sci*, 40, 309-319. doi:10.2131/jts.40.309
- Sucman E, Vavrova M, Zima S, Korinek P, Pavelka J and Gargosova HZ, 2001. Studies on the transfer of harmful substances from feed to chicken tissues. *Canadian Journal of Analytical Sciences and Spectroscopy*, 46, 89-94.
- Summer CL, Giesy JP, Bursian SJ, Render JA, Kubiak TJ, Jones PD, Verbrugge DA and Aulerich RJ, 1996a. Effects induced by feeding organochlorine-contaminated carp from Saginaw Bay, Lake Huron, to laying White Leghorn hens. I. Effects on health of adult hens, egg production, and fertility. *J Toxicol Environ Health*, 49, 389-407.
- Summer CL, Giesy JP, Bursian SJ, Render JA, Kubiak TJ, Jones PD, Verbrugge DA and Aulerich RJ, 1996b. Effects induced by feeding organochlorine-contaminated carp from Saginaw Bay, Lake Huron, to laying White Leghorn hens. II. Embryotoxic and teratogenic effects. *J Toxicol Environ Health*, 49, 409-438.
- Sun XL, Kido T, Okamoto B, HD, Manh, Maruzeni S, Nishijo M, Nakagawa H, Honma S, Nakano T, Takasuga T, Nhu DD, Hung NN and Son LK, 2014. Relationship between dioxin and steroid hormones in sera of Vietnamese men, *Biomarkers*, Early online: 1-5.
- Sures B and Knopf K, 2004. Individual and combined effects of cadmium and 3,3',4,4',5-pentachlorobiphenyl (PCB 126) on the humoral immune response in European eel (*Anguilla anguilla*) experimentally infected with larvae of *Anguillicola crassus* (Nematoda). *Parasitology*, 128, 445-454.
- Sures B, Lutz I and Kloas W, 2006. Effects of infection with *Anguillicola crassus* and simultaneous exposure with Cd and 3,3',4,4',5-pentachlorobiphenyl (PCB 126) on the levels of cortisol and glucose in European eel (*Anguilla anguilla*). *Parasitology*, 132, 281-288. doi:10.1017/s0031182005009017
- Svobodova Z, Prokes M, Groch L, Piacka V, Penaz M and Barus V, 1996. Ontogenetic characterization of young carp (*Cyprinus carpio*) obtained by artificial reproduction of parental fishes loaded with PCB residues. *Acta Universitatis Carolinae-Biologica*, 39, 251-259.
- 't Mannelte A, Eng A, Walls C, Dryson E, Kogevinas M, Brooks C, McLean D, Cheng S, Smith AH and Pearce N, 2017. Sex ratio of the offspring of New Zealand phenoxy herbicide producers exposed to 2,3,7,8-tetrachlorodibenzo-*p*-dioxin. *Occupational and Environmental Medicine*, 74, 24-29. doi:10.1136/oemed-2016-103771
- Tajimi M, Uehara R, Watanabe M, Oki I, Ojima T and Nakamura Y, 2005. Relationship of PCDD/F and Co-PCB concentrations in breast milk with infant birthweights in Tokyo, Japan. *Chemosphere*, 61, 383-388. doi:10.1016/j.chemosphere.2005.02.085
- Thomae TL, Glover E and Bradfield CA, 2004. A maternal Ahr null genotype sensitizes embryos to chemical teratogenesis. *Journal of Biological Chemistry*, 279, 30189-30194.
- Thomas GO, Sweetman AJ and Jones KC, 1999. Metabolism and body-burden of PCBs in lactating dairy cows. *Chemosphere*, 39, 1533-1544.
- Thorpe S, Kelly M, Startin J, Harrison N and Rose M, 2001. Concentration changes for 5 PCDD/F congeners after administration in beef cattle. *Chemosphere*, 43, 869-879.
- Tietge JE, Johnson RD, Jensen KM, Cook PM, Elonen GE, Fernandez JD, Holcombe GW, Lothenbach DB and Nichols JW, 1998. Reproductive toxicity and disposition of 2,3,7,8-tetrachlorodibenzo-*p*-



- dioxin in adult brook trout (*Salvelinus fontinalis*) following a dietary exposure. *Environmental Toxicology and Chemistry*, 17, 2395-2407.
- Toft G, Long M, Krüger T, Hjelmberg PS, Bonde JP, Rignell-Hydbom A, Tyrkiel E, Hagmar L, Giwercman A, Spanó M, Bizzaro D, Pedersen HS, Lesovoy V, Ludwicki JK and Bonefeld-Jørgensen EC, 2007. Semen Quality in Relation to Xenohormone and Dioxin-like Serum Activity Among Inuits and Three European Populations. *Environmental Health Perspectives*, 115, 15-20. doi:10.1289/ehp.9352
- Torre CD, Buonocore F, Frenzilli G, Corsolini S, Brunelli A, Guidi P, Kocan A, Mariottini M, Mottola F, Nigro M, Pozo K, Randelli E, Vannuccini ML, Picchietti S, Santonastaso M, Scarcelli V, Focardi S, Marcomini A, Rocco L, Scapigliati G and Corsi I, 2015. Influence of titanium dioxide nanoparticles on 2,3,7,8-tetrachlorodibenzo-*p*-dioxin bioconcentration and toxicity in the marine fish European sea bass (*Dicentrarchus labrax*). *Environ Pollut*, 196, 185-193. doi:10.1016/j.envpol.2014.09.020
- Torstensen BE, Espe M, Sanden M, Stubhaug I, Waagbø R, Hemre GI, Fontanillas R, Nordgarden U, Hevrøy EM, Olsvik P and Berntssen MHG, 2008. Novel production of Atlantic salmon (*Salmo salar*) protein based on combined replacement of fish meal and fish oil with plant meal and vegetable oil blends. *Aquaculture*, 285, 193-200. doi:https://doi.org/10.1016/j.aquaculture.2008.08.025
- Traag WA, Kan CA, van der Weg G, Onstenk C and Hoogenboom LA, 2006. Residues of dioxins (PCDD/Fs) and PCBs in eggs, fat and livers of laying hens following consumption of contaminated feed. *Chemosphere*, 65, 1518-1525. doi:10.1016/j.chemosphere.2006.04.001
- Tsukimori K, Tokunaga S, Shibata S, Uchi H, Nakayama D, Lshimam T, Nakano H, Wake N, Yoshimura T and Furue M, 2008. Long-term effects of polychlorinated biphenyls and dioxins on pregnancy outcomes in women affected by the Yusho incident. *Environmental Health Perspectives*, 116, 626-630. doi:10.1289/ehp.10686
- Tsukimori K, Uchi H, Mitoma C, Yasukawa F, Chiba T, Todaka T, Kajiwara J, Yoshimura T, Hirata T, Fukushima K, Wake N and Furue M, 2012. Maternal exposure to high levels of dioxins in relation to birth weight in women affected by Yusho disease. *Environment International*, 38, 79-86. doi:10.1016/j.envint.2011.08.010
- Tsukimori K, Uchi H, Tokunaga S, Yasukawa F, Chiba T, Kajiwara J, Hirata T and Furue M, 2013. Blood levels of PCDDs, PCDFs, and coplanar PCBs in Yusho mothers and their descendants: Association with fetal Yusho disease. *Chemosphere*, 90, 1581-1588. doi:10.1016/j.chemosphere.2012.08.024
- Tsukino H, Hanaoka T, Sasaki H, Motoyama H, Hiroshima M, Tanaka T, Kabuto M, Niskar AS, Rubin C, Patterson DG, Turner W, Needham L and Tsugane S, 2005. Associations between serum levels of selected organochlorine compounds and endometriosis in infertile Japanese women. *Environmental Research*, 99, 118-125. doi:https://doi.org/10.1016/j.envres.2005.04.003
- Tuomisto JT, Viluksela M, Pohjanvirta R and Tuomisto J, 2000. Changes in food intake and food selection in rats after 2,3,7,8-tetrachlorodibenzo-*p*-dioxin (TCDD) exposure. *Pharmacology Biochemistry and Behavior*, 65, 381-387.
- Turyk ME, Anderson HA, Freels S, Chatterton R, Jr., Needham LL, Patterson DG, Jr., Steenport DN, Knobeloch L, Imm P and Persky VW, 2006. Associations of organochlorines with endogenous hormones in male Great Lakes fish consumers and nonconsumers. *Environ Res*, 102, 299-307. doi:10.1016/j.envres.2006.01.009
- Uemura H, Arisawa K, Hiyoshi M, Satoh H, Sumiyoshi Y, Morinaga K, Kodama K, Suzuki T, Nagai M and Suzuki T, 2008. Associations of environmental exposure to dioxins with prevalent diabetes among general inhabitants in Japan. *Environ Res*, 108, 63-68. doi:10.1016/j.envres.2008.06.002
- Uemura H, Arisawa K, Hiyoshi M, Kitayama A, Takami H, Sawachika F, Dakeshita S, Nii K, Satoh H, Sumiyoshi Y, Morinaga K, Kodama K, Suzuki T, Nagai M and Suzuki T, 2009. Prevalence of metabolic syndrome associated with body burden levels of dioxin and related compounds among Japan's general population. *Environ Health Perspect*, 117, 568-573. doi:10.1289/ehp.0800012

- United States Environmental Protection Agency (US EPA). 2012. EPA's Reanalysis of Key Issues Related to Dioxin Toxicity and Response to NAS Comments, Volume 1. Washington, DC: US Environmental Protection Agency. EPA/600/R-10/038F.
- Urban P, Pelclova D, Lukas E, Kupka K, Preiss J, Fenclova Z and Smerhovsky Z, 2007. Neurological and neurophysiological examinations on workers with chronic poisoning by 2,3,7,8-TCDD: follow-up 35 years after exposure. *European Journal of Neurology*, 14, 213-218. doi:10.1111/j.1468-1331.2006.01618.x
- US-EPA (United States - Environmental Protection Agency), 2012. EPA's Reanalysis of Key Issues Related to Dioxin Toxicity and Response to NAS Comments, Volume 1. Washington, DC: US Environmental Protection Agency. EPA/600/R-10/038F.
- Vaccaro E, Meucci V, Intorre L, Soldani G, Di Bello D, Longo V, Gervasi PG and Pretti C, 2005. Effects of 17 beta-estradiol, 4-nonylphenol and PCB 126 on the estrogenic activity and phase 1 and 2 biotransformation enzymes in male sea bass (*Dicentrarchus labrax*). *Aquatic Toxicology*, 75, 293-305. doi:10.1016/j.aquatox.2005.08.009
- Vafeiadi M, Agramunt S, Papadopoulou E, Besselink H, Mathianaki K, Karakosta P, Spanaki A, Koutis A, Chatzi L, Vrijheid M and Kogevinas M, 2013. *In Utero* Exposure to Dioxins and Dioxin-like Compounds and Anogenital Distance in Newborns and Infants. *Environmental Health Perspectives*, 121, 125-130. doi:10.1289/ehp.1205221
- Vafeiadi M, Agramunt S, Pedersen M, Besselink H, Chatzi L, Fthenou E, Fleming S, Hardie LJ, Wright J, Knudsen LE, Nielsen JK, Sunyer J, Carreras R, Brunborg G, Gutzkow KB, Nygaard UC, Lovik M, Kyrtopoulos SA, Segerback D, Merlo DF, Kleinjans JC, Vrijheid M and Kogevinas M, 2014. *In utero* exposure to compounds with dioxin-like activity and birth outcomes. *Epidemiology*, 25, 215-224. doi:10.1097/ede.0000000000000046
- van den Berg M, Birnbaum LS, Denison M, de Vito M, Farland W, Feeley M, Fiedler H, Hakansson H, Hanberg A, Haws L, Rose M, Safe S, Schrenk D, Tohyama C, Tritscher A, Tuomisto J, Tysklind, Walker N and Peterson RE, 2006. The 2005 World Health Organization re-evaluation of human and mammalian toxic equivalency factors for dioxins and dioxin-like compounds.
- Van Den Heuvel RL, Koppen G, Staessen JA, Hond ED, Verheyen G, Nawrot TS, Roels HA, Vlietinck R and Schoeters GER, 2002. Immunologic biomarkers in relation to exposure markers of PCBs and dioxins in Flemish adolescents (Belgium). *Environmental Health Perspectives*, 110, 595-600.
- van der Plas SA, Haag-Gronlund M, Scheu G, Warngard L, van den Berg M, Wester P, Koeman JH and Brouwer A, 1999. Induction of altered hepatic foci by a mixture of dioxin-like compounds with and without 2,2',4,4',5,5'-hexachlorobiphenyl in female Sprague-Dawley rats. *Toxicology and Applied Pharmacology*, 156, 30-39.
- Van Eijkeren JC, Zeilmaker MJ, Kan CA, Traag WA and Hoogenboom LA, 2006. A toxicokinetic model for the carry-over of dioxins and PCBs from feed and soil to eggs. *Food Addit Contam*, 23, 509-517. doi:10.1080/02652030500512045
- van Esterik JCJ, Verharen HW, Hodemaekers HM, Gremmer ER, Nagarajah B, Kamstra JH, Dolle MET, Legler J and van der Ven LTM, 2015. Compound- and sex-specific effects on programming of energy and immune homeostasis in adult C57BL/6JxWB mice after perinatal TCDD and PCB 153. *Toxicology and Applied Pharmacology*, 289, 262-275. doi:10.1016/j.taap.2015.09.017
- Van Ginneken V, Palstra A, Leonards P, Nieveen M, van den Berg H, Flik G, Spanings T, Niemantsverdriet P, van den Thillart G and Murk A, 2009. PCBs and the energy cost of migration in the European eel (*Anguilla anguilla* L.). *Aquat Toxicol*, 92, 213-220. doi:10.1016/j.aquatox.2009.01.004
- vanderOost R, Opperhuizen A, Satumalay K, Heida H and Vermeulen NPE, 1996. Biomonitoring aquatic pollution with feral eel (*Anguilla anguilla*) .1. Bioaccumulation: Biota-sediment ratios of PCBs, OCPs, PCDDs and PCDFs. *Aquatic Toxicology*, 35, 21-46. doi:10.1016/0166-445x(96)00002-1
- Van der Weiden MEJ, Craane LHJ, Evers EHG, Kooke RMM, Olie K, Seinen W and Vandenberg M, 1989. Bioavailability of PCDDs and PCDFs from bottom sediments and some associated biological

- effects in the carp (*Cyprinus carpio*). *Chemosphere*, 19, 1009-1016. doi:10.1016/0045-6535(89)90450-5
- Van der Weiden MEJ, Vanderkolk J, Bleumink R, Seinen W and Vandenberg M, 1992. Concurrence of P450-1A1 induction and toxic effects after administration of a low dose of 2,3,7,8-tetrachlorodibenzo-*p*-dioxin (TCDD) in the rainbow trout (*Oncorhynchus mykiss*). *Aquatic Toxicology*, 24, 123-142. doi:10.1016/0166-445x(92)90020-n
- Van der Weiden MEJ, Tibosch HJH, Bleumink R, Sinnige TL, Vandeguchte C, Seinen W and Vandenberg M, 1993. Cytochrome P450-1A1 induction in the common carp (*Cyprinus carpio*) following exposure to contaminated sediments with halogenated polyaromatics. *Chemosphere*, 27, 1297-1309. doi:10.1016/0045-6535(93)90177-7
- Van der Weiden MEJ, Bleumink R, Seinen W and Vandenberg M, 1994. Concurrence of P450-1A1 induction and toxic effects in the mirror carp (*Cyprinus carpio*), after administration of a low-dose of 2,3,7,8-tetrachlorodibenzo-*p*-dioxin. *Aquatic Toxicology*, 29, 147-162. doi:10.1016/0166-445x(94)90065-5
- Vartiainen T, Jaakkola JJ, Saarikoski S and Tuomisto J, 1998. Birth weight and sex of children and the correlation to the body burden of PCDDs/PCDFs and PCBs of the mother. *Environ Health Perspect*, 106, 61-66.
- Verweij F, Booij K, Satumalay K, van der Molen N and van der Oost R, 2004. Assessment of bioavailable PAH, PCB and OCP concentrations in water, using semipermeable membrane devices (SPMDs), sediments and caged carp. *Chemosphere*, 54, 1675-1689. doi:10.1016/j.chemosphere.2003.10.002
- Viel JF, Floret N, Deconinck E, Focant JF, De Pauw E and Cahn JY, 2011. Increased risk of non-Hodgkin lymphoma and serum organochlorine concentrations among neighbors of a municipal solid waste incinerator. *Environ Int*, 37, 449-453. doi:10.1016/j.envint.2010.11.009
- Vijayan MM, Feist G, Otto DME, Schreck CB and Moon TW, 1997. 3,3',4,4'-Tetrachlorobiphenyl affects cortisol dynamics and hepatic function in rainbow trout. *Aquatic Toxicology*, 37, 87-98. doi:10.1016/s0166-445x(96)00828-4
- Viluksela M, Stahl BU, Birnbaum LS, Schramm KW, Kettrup A and Rozman KK, 1998a. Subchronic/chronic toxicity of a mixture of four chlorinated dibenzo-*p*-dioxins in rats - I. Design, general observations, hematology, and liver concentrations. *Toxicology and Applied Pharmacology*, 151, 57-69
- Viluksela M, Stahl BU, Birnbaum LS and Rozman KK, 1998b. Subchronic/chronic toxicity of a mixture of four chlorinated dibenzo-*p*-dioxins in rats - II. Biochemical effects. *Toxicology and Applied Pharmacology*, 151, 70-78
- Viluksela M, Bager Y, Tuomisto JT, Scheu G, Unkila M, Pohjanvirta R, Flodstrom S, Kosma VM, Maki-Paakkanen J, Vartiainen T, Klimm C, Schramm KW, Warngard L and Tuomisto J, 2000. Liver tumor-promoting activity of 2,3,7,8-tetrachlorodibenzo-*p*-dioxin (TCDD) in TCDD-sensitive and TCDD-resistant rat strains. *Cancer Research*, 60, 6911-6920.
- Virtanen HE, Koskeniemi JJ, Sundqvist E, Main KM, Kiviranta H, Tuomisto JT, Tuomisto J, Viluksela M, Vartiainen T, Skakkebaek NE and Toppari J, 2012. Associations between congenital cryptorchidism in newborn boys and levels of dioxins and PCBs in placenta. *International Journal of Andrology*, 35, 283-293. doi:10.1111/j.1365-2605.2011.01233.x
- Vives I, Grimalt JO, Ventura M, Catalan J and Rosseland BO, 2005. Age dependence of the accumulation of organochlorine pollutants in brown trout (*Salmo trutta*) from a remote high mountain lake (Redo, Pyrenees). *Environ Pollut*, 133, 343-350. doi:10.1016/j.envpol.2004.05.027
- Vrecl M, Ursic M, Pogacnik A, Zupancic-Kralj L and Jan J, 2005. Excretion pattern of co-planar and non-planar tetra- and hexa-chlorobiphenyls in ovine milk and faeces. *Toxicol Appl Pharmacol*, 204, 170-174. doi:10.1016/j.taap.2004.08.017

- Vreugdenhil HJI, Slijper FME, Mulder PGH and Weisglas-Kuperus N, 2002. Effects of perinatal exposure to PCBs and dioxins on play behavior in Dutch children at school age. *Environmental Health Perspectives*, 110, A593-A598.
- Vuorinen PJ, Paasivirta J, Keinanen M, Koistinen J, Rantio T, Hyotylainen T and Welling L, 1997. The M74 syndrome of Baltic salmon (*Salmo salar*) and organochlorine concentrations in the muscle of female salmon. *Chemosphere*, 34, 1151-1166. doi:10.1016/s0045-6535(97)00415-3
- Vuorinen PJ, Parmanne R, Vartiainen T, Keinanen M, Kiviranta H, Kotovuori O and Halling F, 2002. PCDD, PCDF, PCB and thiamine in Baltic herring (*Clupea harengus* L.) and sprat *Sprattus sprattus* (L.) as a background to the M74 syndrome of Baltic salmon (*Salmo salar* L.). *Ices Journal of Marine Science*, 59, 480-496. doi:10.1006/jmsc.2002.1200
- Vuorinen PJ, Keinanen M, Kiviranta H, Koistinen J, Kiljunen M, Myllyla T, Ponni J, Peltonen H, Verta M and Karjalainen J, 2012. Biomagnification of organohalogens in Atlantic salmon (*Salmo salar*) from its main prey species in three areas of the Baltic Sea. *Sci Total Environ*, 421-422, 129-143. doi:10.1016/j.scitotenv.2012.02.002
- Wakui S, Muto T, Motohashi M, Kobayashi Y, Suzuki Y, Takahashi H and Hano H, 2010. Testicular spermiation failure in rats exposed prenatally to 3,3',4,4',5-pentachlorobiphenyl. *Journal of Toxicological Sciences*, 35, 757-765. doi:10.2131/jts.35.757
- Walker MK, Hufnagle LC, Clayton MK and Peterson RE, 1992. An egg injection method for assessing early life stage mortality of polychlorinated dibenzo-para-dioxins, dibenzofurans, and biphenyls in rainbow-trout, (*Oncorhynchus mykiss*). *Aquatic Toxicology*, 22, 15-37. doi:10.1016/0166-445x(92)90033-j
- Walker MK, Cook PM, Batterman AR, Butterworth BC, Berini C, Libal JJ, Hufnagle LC and Peterson RE, 1994. Translocation of 2,3,7,8-tetrachlorodibenzo-*p*-dioxin from adult female lake trout (*Salvelinus namaycush*) to oocytes – effects on early-life stage development and sac fry survival. *Canadian Journal of Fisheries and Aquatic Sciences*, 51, 1410-1419. doi:10.1139/f94-141
- Walker MK, Pollenz RS and Smith SM, 1997. Expression of the aryl hydrocarbon receptor (AhR) and AhR nuclear translocator during chick cardiogenesis is consistent with 2,3,7,8-tetrachlorodibenzo-*p*-dioxin-induced heart defects. *Toxicology and Applied Pharmacology*, 143, 407-419. doi:10.1006/taap.1996.8068
- Walker MK and Catron TF, 2000. Characterization of cardiotoxicity induced by 2,3,7,8-tetrachlorodibenzo-*p*-dioxin and related chemicals during early chick embryo development. *Toxicology and Applied Pharmacology*, 167, 210-221. doi:10.1006/taap.2000.8992
- Walker NJ, Crockett PW, Nyska A, Brix AE, Jokinen MP, Sells DM, Hailey JR, Easterling M, Haseman JK, Yin M, Wyde ME, Bucher JR and Portier CJ, 2005. Dose-additive carcinogenicity of a defined mixture of "dioxin-like compounds". *Environmental Health Perspectives*, 113, 43-48.
- Walker NJ, Wyde ME, Fischer LJ, Nyska A and Bucher JR, 2006. Comparison of chronic toxicity and carcinogenicity of 2,3,7,8-tetrachlorodibenzo-*p*-dioxin (TCDD) in 2-year bioassays in female Sprague-Dawley rats. *Molecular Nutrition & Food Research*, 50, 934-944
- Walker NJ, Yoshizawa K, Miller RA, Brix AE, Sells DM, Jokinen MP, Wyde ME, Easterling M and Nyska A, 2007. Pulmonary lesions in female Harlan Sprague-Dawley rats following two-year oral treatment with dioxin-like compounds. *Toxicol Pathol*, 35, 880-889.
- Walter GL, Jones PD and Giesy JP, 2000. Pathologic alterations in adult rainbow trout, *Oncorhynchus mykiss*, exposed to dietary 2,3,7,8-tetrachlorodibenzo-*p*-dioxin. *Aquatic Toxicology*, 50, 287-299. doi:10.1016/s0166-445x(00)00095-3
- Wang SL, Chen TT, Hsu JF, Hsu CC, Chang LW, Ryan JJ, Guo YLL and Lambert GH, 2003. Neonatal and childhood teeth in relation to perinatal exposure to polychlorinated biphenyls and dibenzofurans: observations of the Yucheng children in Taiwan. *Environmental Research*, 93, 131-137.

- Wang SL, Su PH, Jong SB, Guo YL, Chou WL and Papke O, 2005. *In utero* exposure to dioxins and polychlorinated biphenyls and its relations to thyroid function and growth hormone in newborns. *Environmental Health Perspectives*, 113, 1645-1650. doi:10.1289/ehp.7994
- Wang S-L, Chang Y-C, Chao H-R, Li C-M, Li L-A, Lin L-Y and Olaf Pöpke, 2006. Body Burdens of Polychlorinated Dibenzo-*p*-dioxins, Dibenzofurans, and Biphenyls and Their Relations to Estrogen Metabolism in Pregnant Women. *Environmental Health Perspectives*, 114, 740-745.
- Wang L, Liu XH, Wu D, Xu MZ, Sun T, Cui BS and Yang ZF, 2009. Modelling the depuration rates of polychlorinated biphenyls in *Oncorhynchus mykiss* with quantum chemical descriptors. *SAR QSAR Environmental Research*, 20, 91-101. doi:10.1080/10629360902726031
- Wang I-C and Lee W-J, 2010. Polychlorinated dibenzo-*p*-dioxin, polychlorinated dibenzofurans and polychlorinated biphenyls in farmed fish, water, sediment, and feed. *Journal of Environmental Science and Health, Part A*, 45:2, 201-210, doi: 10.1080/10934520903429873
- Warner M, Eskenazi B, Mocarelli P, Gerthoux PM, Samuels S, Needham L, Patterson D and Brambilla P, 2002. Serum dioxin concentrations and breast cancer risk in the Seveso Women's Health Study. *Environmental Health Perspectives*, 110, 625-628.
- Warner M, Samuels S, Mocarelli P, Gerthoux PM, Needham L, Patterson DG and Eskenazi B, 2004. Serum dioxin concentrations and age at menarche. *Environmental Health Perspectives*, 112, 1289-1292. doi:10.1289/ehp.7004
- Warner M, Eskenazi B, Olive DL, Samuels S, Quick-Miles S, Vercellini P, Gerthoux PM, Needham L, Patterson DG and Mocarelli P, 2007. Serum dioxin concentrations and quality of ovarian function in women of seveso. *Environmental Health Perspectives*, 115, 336-340. doi:10.1289/ehp.9667
- Warner M, Mocarelli P, Samuels S, Needham L, Brambilla P and Eskenazi B, 2011. Dioxin Exposure and Cancer Risk in the Seveso Women's Health Study. *Environmental Health Perspectives*, 119, 1700-1705. doi:10.1289/ehp.1103720
- Warner M, Mocarelli P, Brambilla P, Wesselink A, Samuels S, Signorini S and Eskenazi B, 2013. Diabetes, Metabolic Syndrome, and Obesity in Relation to Serum Dioxin Concentrations: The Seveso Women's Health Study. *Environmental Health Perspectives*, 121, 906-911. doi:10.1289/ehp.1206113
- Watanabe MX, Kunisue T, Tao L, Kannan K, Subramanian A, Tanabe S and Iwata H, 2010. Dioxin-like and perfluorinated compounds in pigs in an Indian open waste dumping site: toxicokinetics and effects on hepatic cytochrome P450 and blood plasma hormones. *Environ Toxicol Chem*, 29, 1551-1560. doi:10.1002/etc.189
- Weisglas-Kuperus N, Patandin S, Berbers GAM, Sas TCJ, Mulder PGH, Sauer PJJ and Hooijkaas H, 2000. Immunologic effects of background exposure to polychlorinated biphenyls and dioxins in Dutch preschool children. *Environmental Health Perspectives*, 108, 1203-1207. doi:10.2307/3434834
- Wesselink A, Warner M, Samuels S, Parigi A, Brambilla P, Mocarelli P and Eskenazi B, 2014. Maternal dioxin exposure and pregnancy outcomes over 30 years of follow-up in Seveso. *Environment International*, 63, 143-148. doi:10.1016/j.envint.2013.11.005
- Whittle DM, Sergeant DB, Huestis SY and Hyatt WH, 1992. Foodchain accumulation of PCDD and PCDF isomers in the great-lakes aquatic community. *Chemosphere*, 25, 1559-1563. doi:10.1016/0045-6535(92)90184-s
- WHO (World Health Organization), 1998. Executive summary. Assessment of the health risk of dioxins: re-evaluation of the Tolerable Daily Intake (TDI). WHO Consultation May 25-29, 1998, Geneva, Switzerland. WHO European Centre for Environmental Health and International Programme on Chemical Safety. World Health Organization, Geneva.
- WHO/FAO (World Health Organization/Food and Agricultural Organisation), 2002. WHO Technical report Series 909. Evaluation of certain food additives and contaminants. Fifty-seventh report of the Joint FAO/WHO Expert Committee on Food Additives. Geneva 2002.



- WHO/IPCS (World Health Organization/International Programme on Chemical Safety), 2008. Uncertainty and data quality in exposure assessment. Harmonisation project document No. 6. ISBN 978 92 4 156376 5.U.
- WHO/IPCS (World Health Organization/International Programme on Chemical Safety), 2009. Principles and Methods for the Risk Assessment of Chemicals in Food, International Programme on Chemical Safety, Environmental Health Criteria 240. Available online: [http://www.inchem.org/documents/ehc/ehc/ehc240\\_index.htm](http://www.inchem.org/documents/ehc/ehc/ehc240_index.htm)
- Wikenheiser J, Karunamuni G, Slotter E, Walker MK, Roy D, Wilson DL and Watanabe M, 2013. Altering HIF-1 alpha Through 2,3,7,8-Tetrachlorodibenzo-*p*-Dioxin (TCDD) Exposure Affects Coronary Vessel Development. *Cardiovasc Toxicol*, 13, 161-167. doi:10.1007/s12012-012-9194-7
- Wilhelm M, Wittsiepe J, Lemm F, Ranft U, Kramer U, Furst P, Roseler SC, Greshake M, Imohl M, Eberwein G, Rauchfuss K, Kraft M and Winneke G, 2008. The Duisburg birth cohort study: Influence of the prenatal exposure to PCDD/Fs and dioxin-like PCBs on thyroid hormone status in newborns and neurodevelopment of infants until the age of 24 months. *Mutation Research-Reviews in Mutation Research*, 659, 83-92. doi:10.1016/j.mrrev.2007.11.002
- Williams LL and Giesy JP, 1992. Relationships among concentrations of individual polychlorinated biphenyl (PCB) congeners, 2,3,7,8-tetrachlorodibenzo-*P*-dioxin equivalents (TCDD-eq), and rearing mortality of chinook salmon (*Oncorhynchus tshawytscha*) eggs from lake Michigan. *Journal of Great Lakes Research*, 18, 108-124.
- Winneke G, Ranft U, Wittsiepe J, Kasper-Sonnenberg M, Furst P, Kramer U, Seitner G and Wilhelm M, 2014. Behavioral Sexual Dimorphism in School-Age Children and Early Developmental Exposure to Dioxins and PCBs: A Follow-Up Study of the Duisburg Cohort. *Environmental Health Perspectives*, 122, 292-298. doi:10.1289/ehp.1306533
- Wittsiepe J, Erlenkaemper B, Welge P, Hack A and Wilhelm M, 2007. Bioavailability of PCDD/F from contaminated soil in young Goettingen minipigs. *Chemosphere*, 67, S355-S364. doi:10.1016/j.chemosphere.2006.05.129
- Wohlfahrt-Veje C, Audouze K, Brunak S, Antignac JP, Bizec BI, Juul A, Skakkebaek NE and Main KM, 2014. Polychlorinated dibenzo-*p*-dioxins, furans, and biphenyls (PCDDs/PCDFs and PCBs) in breast milk and early childhood growth and IGF1. *Reproduction*, 147, 391-399. doi:10.1530/REP-13-0422
- Wright PJ and Tillitt DE, 1999. Embryotoxicity of Great Lakes lake trout extracts to developing rainbow trout. *Aquatic Toxicology*, 47, 77-92,
- Wu WZ, Schramm KW, Xu Y and Kettrup A, 2001a. Accumulation and partition of polychlorinated dibenzo-*p*-dioxins and dibenzofurans (PCDD/F) in the muscle and liver of fish. *Chemosphere*, 43, 633-641. doi:10.1016/s0045-6535(00)00415-x
- Wu WZ, Schramm KW, Xu Y and Kettrup A, 2001b. Bioaccumulation of polychlorinated dibenzo-*p*-dioxins and dibenzofurans in the foodweb of Ya-Er Lake area, China. *Water Research*, 35, 1141-1148.
- Wu J-P, Luo X-J, Zhang Y, Luo Y, Chen S-J, Mai B-X and Yang Z-Y, 2008. Bioaccumulation of polybrominated diphenyl ethers (PBDEs) and polychlorinated biphenyls (PCBs) in wild aquatic species from an electronic waste (e-waste) recycling site in South China. *Environment International*, 34, 1109-1113. doi:10.1016/j.envint.2008.04.001
- Wu J-P, Luo X-J, Zhang Y, Yu M, Chen S-J, Mai B-X and Yang Z-Y, 2009. Biomagnification of polybrominated diphenyl ethers (PBDEs) and polychlorinated biphenyls in a highly contaminated freshwater food web from South China. *Environmental Pollution*, 157, 904-909. doi:10.1016/j.envpol.2008.11.001
- Wu X, Yang J, Morisseau C, Robertson LW, Hammock B and Lehmler H-J, 2016. 3,3',4,4',5-Pentachlorobiphenyl (PCB 126) decreases hepatic and systemic ratios of epoxide to diol metabolites of unsaturated fatty acids in male rats. *Toxicological Sciences*, 152, 309-322. doi:10.1093/toxsci/kfw084

- Xiao R, Arnot JA and MacLeod M, 2015. Towards an improved understanding of processes controlling absorption efficiency and biomagnification of organic chemicals by fish. *Chemosphere*, 138, 89-95. doi:10.1016/j.chemosphere.2015.05.053
- Xu Y, Zhang J, Li W, Schramm KW and Kettrup A, 2002. Endocrine effects of sublethal exposure to persistent organic pollutants (POPs) on silver carp (*Hypophthalmichthys molitrix*). *Environmental Pollution*, 120, 683-690.
- Xu P, Lou X, Ding G, Shen H, Wu L, Chen Z, Han J, Han G and Wang X, 2014. Association of PCB, PBDE and PCDD/F body burdens with hormone levels for children in an e-waste dismantling area of Zhejiang Province, China. *Science of the Total Environment*, 499, 55-61. doi:10.1016/j.scitotenv.2014.08.057
- Yamauchi M, Kim E-Y, Iwata H, Shima Y and Tanabe S, 2006. Toxic effects of 2,3,7,8-tetrachlorodibenzo-*p*-dioxin (TCDD) in developing red seabream (*Pagrus major*) embryo: An association of morphological deformities with AHR1, AHR2 and CYP1A expressions. *Aquatic Toxicology*, 80, 166-179. doi:10.1016/j.aquatox.2006.08.006
- Yang JZ, Agarwal SK and Foster WG, 2000. Subchronic exposure to 2,3,7,8-tetrachlorodibenzo-*p*-dioxin modulates the pathophysiology of endometriosis in the cynomolgus monkey. *Toxicological Sciences*, 56, 374-381. doi:10.1093/toxsci/56.2.374
- Yasuda I, Yasuda M, Sumida H, Tsusaki H, Arima A, Ihara T, Kubota S, Asaoka K, Tsuga K and Akagawa Y, 2005. In utero and lactational exposure to 2,3,7,8-tetrachlorodibenzo-*p*-dioxin (TCDD) affects tooth development in rhesus monkeys. *Reproductive Toxicology*, 20, 21-30.
- Yeager RL, Franzosa JA, Millsap DS, Lim J, Hansen CM, Jasevicius AV, Heise SS, Wakhungu P, Whelan HT, Eells JT and Henshel DS, 2006a. Embryonic growth and hatching implications of developmental 670-nm phototherapy and dioxin co-exposure. *Photomedicine and Laser Surgery*, 24, 410-413. doi:10.1089/pho.2006.24.410
- Yeager RL, Franzosa JA, Millsap DS, Lim J, Heise SS, Wakhungu P, Whelan HT, Eells JT and Henshel DS, 2006b. Survivorship and mortality implications of developmental 670-nm phototherapy: Dioxin co-exposure. *Photomedicine and Laser Surgery*, 24, 29-32. doi:10.1089/pho.2006.24.29
- Yeager RL, Franzosa JA, Millsap DS, Lim J, Hansen CM, Jasevicius AV, Heise SS, Wakhungu P, Whelan HT, Eells JT and Henshel DS, 2006c. Brief report: embryonic growth and hatching implications of developmental 670-nm phototherapy and dioxin co-exposure. *Photomed Laser Surg*, 24, 410-413. doi:10.1089/pho.2006.24.410
- Yeager RL, Lim J, Millsap DS, Jasevicius AV, Sanders RA, Whelan HT, Watkins JB, Eells JT and Henshel DS, 2006d. 670 nanometer light treatment attenuates dioxin toxicity in the developing chick embryo. *J Biochem Mol Toxicol*, 20, 271-278. doi:10.1002/jbt.20146
- Yi SW, Ohrr H, Won JU, Song JS and Hong JS, 2013. Serum 2,3,7,8-tetrachlorodibenzo-*p*-dioxin levels and their association with age, body mass index, smoking, military record-based variables, and estimated exposure to Agent Orange in Korean Vietnam veterans. *J Prev Med Public Health*, 46, 226-236. doi:10.3961/jpmp.2013.46.5.226
- Yoshizawa K, Walker NJ, Jokinen MP, Brix AE, Sells DM, Marsh T, Wyde ME, Orzech D, Haseman JK and Nyska A, 2005. Gingival carcinogenicity in female Harlan Sprague-Dawley rats following two-year oral treatment with 2,3,7,8-tetrachlorodibenzo-*p*-dioxin and dioxin-like compounds. *Toxicol Sci*, 83, 64-77.
- Yoshizawa K, Brix AE, Sells DM, Jokinen MP, Wyde M, Orzech DP, Kissling GE, Walker NJ and Nyska A, 2009. Reproductive Lesions in Female Harlan Sprague-Dawley Rats Following Two-Year Oral Treatment with Dioxin and Dioxin-like Compounds. *Toxicologic Pathology*, 37, 921-937.
- Yoshizawa K, Walker NJ, Nyska A, Kissling GE, Jokinen MP, Brix AE, Sells DM and Wyde ME, 2010. Thyroid Follicular Lesions Induced by Oral Treatment for 2 Years with 2,3,7,8-Tetrachlorodibenzo-*p*-dioxin and Dioxin-like Compounds in Female Harlan Sprague-Dawley Rats. *Toxicologic Pathology*, 38, 1037-1050.



- Zabel EW, Cook PM and Peterson RE, 1995a. Toxic equivalency factors of polychlorinated dibenzo-*p*-dioxin, dibenzofuran and biphenyl congeners based on early-life stage mortality in rainbow trout (*Oncorhynchus mykiss*). *Aquatic Toxicology*, 31, 315-328. doi:10.1016/0166-445x(94)00075-2
- Zabel EW, Walker MK, Hornung MW, Clayton MK and Peterson RE, 1995b. Interactions of polychlorinated dibenzo-*p*-dioxin, dibenzofuran, and biphenyl congeners for producing rainbow trout early life stage mortality. *Toxicol Appl Pharmacol*, 134, 204-213. doi:10.1006/taap.1995.1185
- Zabel EW, Cook PM and Peterson RE, 1995c. Potency of 3,3',4,4',5-pentachlorobiphenyl (PCB-126), alone and in combination with 2,3,7,8-tetrachlorodibenzo-*p*-dioxin (TCDD), to produce lake trout early life-stage mortality. *Environmental Toxicology and Chemistry*, 14, 2175-2179. doi:10.1897/1552-8618(1995)14[2175:poppaa]2.0.co;2
- Zabik MJ, Polin D, Underwood M, Wiggers P and Zabik ME, 1998. Tissue residues in male chickens fed a 50 ng/kg dietary concentration of 2,3,7,8-tetrachlorodibenzo-*p*-dioxin. *Bull Environ Contam Toxicol*, 61, 664-668.
- Zhang Q, Yang L and Wang WX, 2011. Bioaccumulation and trophic transfer of dioxins in marine copepods and fish. *Environ Pollut*, 159, 3390-3397. doi:10.1016/j.envpol.2011.08.031
- Zhao F, Mayura K, Kocurek N, Edwards JF, Kubena LF, Safe SH and Phillips TD, 1997. Inhibition of 3,3',4,4',5-pentachlorobiphenyl-induced chicken embryotoxicity by 2,2',4,4',5,5'-hexachlorobiphenyl. *Fundamental and Applied Toxicology*, 35, 1-8. doi:10.1006/faat.1996.2251
- Zhao X, Zheng M, Zhang B, Zhang Q and Liu W, 2006. Evidence for the transfer of polychlorinated biphenyls, polychlorinated dibenzo-*p*-dioxins, and polychlorinated dibenzofurans from soil into biota. *Sci Total Environ*, 368, 744-752. doi:10.1016/j.scitotenv.2006.02.027
- Zheng XB, Luo XJ, Zheng J, Zeng YH and Mai BX, 2015. Contaminant sources, gastrointestinal absorption, and tissue distribution of organohalogenated pollutants in chicken from an e-waste site. *Sci Total Environ*, 505, 1003-1010. doi:10.1016/j.scitotenv.2014.10.076
- Zhu C, Wang P, Li Y, Chen Z, Li W, Ssebugere P, Zhang Q and Jiang G, 2015. Bioconcentration and trophic transfer of polychlorinated biphenyls and polychlorinated dibenzo-*p*-dioxins and dibenzofurans in aquatic animals from an e-waste dismantling area in East China. *Environmental Science-Processes & Impacts*, 17, 693-699. doi:10.1039/c5em00028a
- Zimmer KE, Gutleb AC, Lyche JL, Dahl E, Oskam IC, Krogeneraes A, Skaare JU and Ropstad E, 2009. Altered Stress-Induced Cortisol Levels in Goats Exposed to Polychlorinated Biphenyls (PCB 126 and PCB 153) During Fetal and Postnatal Development. *Journal of Toxicology and Environmental Health-Part a-Current Issues*, 72, 164-172. doi:10.1080/15287390802539004
- Zimmer KE, Kraugerud M, Aleksandersen M, Gutleb AC, Ostby GC, Dahl E, Berg V, Skaare JU, Olsaker I and Ropstad E, 2013. Fetal Adrenal Development: Comparing Effects of Combined Exposures to PCB 118 and PCB 153 in a Sheep Model. *Environmental Toxicology*, 28, 164-177. doi:10.1002/tox.20703
- Zitko V and Choi PM, 1973. Oral toxicity of chlorinated dibenzofurans to juvenile Atlantic salmon. *Bull Environ Contam Toxicol*, 10, 120-122.

## Abbreviations

|                |                                                                                   |
|----------------|-----------------------------------------------------------------------------------|
| ADME           | Absorption, distribution, metabolism and excretion                                |
| AHR            | Aryl hydrocarbon receptor                                                         |
| AFHS           | Air Force Health Study                                                            |
| ALP            | Alkaline phosphatase                                                              |
| ALT            | Alanine aminotransferase                                                          |
| ALT            | Alanine transaminase                                                              |
| AST            | Aspartate aminotransferase                                                        |
| ATSDR          | Agency for Toxic Substances and Disease Registry                                  |
| BCF            | Bioconcentration factor                                                           |
| BFRs           | Brominated Flame Retardants                                                       |
| BIOCONTAM Unit | EFSA Unit on Biological Hazards and Contaminants                                  |
| BMD            | Benchmark dose                                                                    |
| BMDL           | Benchmark dose lower confidence limit                                             |
| BMI            | Body mass index                                                                   |
| bw             | Body weight                                                                       |
| CAT            | Critical appraisal tool                                                           |
| Cd             | Cadmium                                                                           |
| CI             | Confidence interval                                                               |
| CONTAM Panel   | EFSA Panel on Contaminants in the Food Chain                                      |
| CYP            | Cytochrome P450                                                                   |
| DATA Unit      | EFSA Evidence Management Unit (former DCM Unit)                                   |
| DL-PCBs        | Dioxin-like PCBs                                                                  |
| DM             | Dry matter                                                                        |
| EFSA           | European Food Safety Authority                                                    |
| ELS            | Extensive literature search                                                       |
| EPA            | Environmental Protection Agency                                                   |
| EROD           | Ethoxyresorufin-O-deethylase                                                      |
| EU             | European Union                                                                    |
| FAO/WHO        | Food and Agriculture Organization of the United Nations/World Health Organization |
| FDA            | US Food and Drug Administration (US)                                              |
| FEDIAF         | European Pet Food Industry Federation                                             |
| FFQ            | Food Frequency Questionnaire                                                      |
| FLEHS          | Flemish Environment and Health Study                                              |
| FSH            | Follicle stimulating hormone                                                      |
| GC             | Gas chromatography                                                                |
| GD             | Gestation day                                                                     |
| GST            | Glutathione <i>S</i> -transferase                                                 |
| HBGV           | Health-based guidance value                                                       |

|                  |                                                        |
|------------------|--------------------------------------------------------|
| HRMS             | high-resolution mass spectrometry                      |
| IARC             | International Agency for Research on Cancer            |
| IgA              | Immunoglobulin A                                       |
| IgE              | Immunoglobulin E                                       |
| IgG              | Immunoglobulin G                                       |
| IgM              | Immunoglobulin M                                       |
| IL               | Interleukin                                            |
| <i>i.m.</i>      | intramuscular                                          |
| <i>i.p.</i>      | intraperitoneal                                        |
| IPCS             | International Programme on Chemical Safety             |
| KVHS             | Korean Veterans Health Study                           |
| LB               | Lower bound                                            |
| LD <sub>50</sub> | Lethal dose, median                                    |
| LH               | Luteinizing hormone                                    |
| LOAEL            | Lowest-observed-adverse-effect level                   |
| LOEL             | Lowest-observed-effect level                           |
| LOD              | Limit of detection                                     |
| LOQ              | Limit of quantification                                |
| MS               | Mass spectrometry                                      |
| MSWI             | Municipal solid waste incinerator                      |
| NATO             | North Atlantic Treaty Organization                     |
| NDL-PCBs         | Non dioxin-like PCBs                                   |
| NHANES           | National Health and Nutrition Examination Survey       |
| NK               | Natural killer (cells)                                 |
| NOAEL            | no-observed-adverse-effect level                       |
| NOEL             | no-observed-effect level                               |
| NTP              | US National Toxicology Program                         |
| OCP              | Organochlorine pesticides                              |
| OECD             | Organisation for Economic Co-operation and Development |
| OHAT             | NTP Office of Health Assessment and Translation        |
| OR               | Odds ratio                                             |
| PBDEs            | Polybrominated diphenyl ethers                         |
| PB(P)K           | Physiologically-based (pharmaco)kinetic (model)        |
| PCBs             | Polychlorinated biphenyls                              |
| PCDDs            | Polychlorinated dibenzo- <i>p</i> -dioxins             |
| PCDFs            | Polychlorinated dibenzofurans                          |
| PND              | Post-natal day                                         |
| POPs             | Persistent organic pollutants                          |
| RfD              | Reference dose                                         |
| <i>s.c.</i>      | Subcutaneous                                           |
| SCAN             | Scientific Committee on Animal Nutrition               |

|        |                                               |
|--------|-----------------------------------------------|
| SCE    | Sister chromatid exchange                     |
| SCF    | Scientific Committee on Food                  |
| SD     | Standard deviation                            |
| SEM    | Standard error of the mean                    |
| SGOT   | Serum glutamic oxaloacetic transaminase       |
| SOP    | Standard operational procedure                |
| SWHS   | Seveso Women's Health Study                   |
| T3     | Triiodothyronine                              |
| T4     | Thyroxine                                     |
| TBG    | Thyroxin binding globulin                     |
| TCDD   | 2,3,7,8- tetrachlorodibenzo- <i>p</i> -dioxin |
| TDI    | Tolerable daily intake                        |
| TEF    | Toxicity equivalency factor                   |
| TEQ    | Toxic equivalents                             |
| TSH    | Thyroid stimulating hormone                   |
| TWI    | Tolerable Weekly Intake                       |
| UB     | Upper bound                                   |
| US EPA | United States Environmental Protection Agency |
| WHO    | World Health Organization                     |
| ww     | Wet weight                                    |
